# Supplementary material for: Local agricultural transition, crisis and migration in the Southern Andes
Source: Research Square preprint supplement (doi:10.21203/rs.3.rs-6450570/v1), 2025-05-05
Supplement: Supplementary file 1 [file 2ecc34f6fb56e9f181d63f44.xlsx]

## Sheet: Hoja1
Site	Latitude	Longitude	Individual	Life history	Sex	Age	14C date	Error	Lab Code	Pasteur Code	Sample	Laterality	87Sr/86Sr	Error	C:N	13Ccoll	13Capat.	15N	Source
Potrero Las Colonias	-32.6093	-69.3621	290	1	ND	adult					cranium	left	0.707345	1.208e-05	3.27454	-14.0178	-5.29083	8.1108	This paper
Potrero Las Colonias	-32.6093	-69.3621	290		ND	adult				AR0500	petrous	left	0.707201	1.882e-05	3.24978	-13.4579	-4.57571	9.04651	This paper
Potrero Las Colonias	-32.6093	-69.3621	292	2	male	adult					cranium	left	0.707365	1.742e-05	3.23435	-16.4378	-5.96032	7.81625	This paper
Potrero Las Colonias	-32.6093	-69.3621	292		male	adult				AR0501	petrous	left	0.707481	1.072e-05	3.31611	-16.6649	-5.83189	7.3104	This paper
Potrero Las Colonias	-32.6093	-69.3621	293	3	male	adult					cranium	right	0.707329	1.206e-05	3.20614	-12.4718	-5.03053	10.3715	This paper
Potrero Las Colonias	-32.6093	-69.3621	293		male	adult				AR0502	petrous	right	0.707304	2.14e-05	3.38369	-12.4884	-5.98736	10.3007	This paper
Potrero Las Colonias	-32.6093	-69.3621	295	4	male	young adult					atlas	NA	0.70736	1.108e-05	3.2456	-13.1966	-5.16597	9.49822	This paper
Potrero Las Colonias	-32.6093	-69.3621	295		male	young adult				AR0196	I1 Md	NA	0.707919	1.356e-05	3.28424	-12.2651	-5.29727	11.328	This paper
Potrero Las Colonias	-32.6093	-69.3621	297	5	female	adult					atlas	NA	0.706787	3.14e-05	3.27827	-11.8878	-5.20502	9.22761	This paper
Potrero Las Colonias	-32.6093	-69.3621	297		female	adult	689	29	CIRAM-11751	AR0195	PM1d Mx	NA	0.707874	1.252e-05	3.28978	-11.9731	NA	10.6359	This paper
Potrero Las Colonias	-32.6093	-69.3621	298		male	23-34				AR0194	atlas	NA	0.707313	1.206e-05	3.29755	NA	NA	NA	This paper
Potrero Las Colonias	-32.6093	-69.3621	299		female	23-34				AR0193	M2d Mx	NA	0.707789	1.6e-05	3.25516	-11.049	NA	10.4839	This paper
Potrero Las Colonias	-32.6093	-69.3621	300	6	male	>49	834	19	D-AMS 047819	AR0192	atlas	NA	0.707328	1.128e-05	3.3016	-13.5358	-5.28397	8.77693	This paper
Potrero Las Colonias	-32.6093	-69.3621	300		male	>49					C Mx	NA	0.707885	1.168e-05	3.54947	-10.91	-6.76726	10.0478	This paper
Potrero Las Colonias	-32.6093	-69.3621	301		male	adult	744	19	D-AMS 047820	AR0524	cranium	right	0.7075	1.496e-05	3.26435	-13.5562	-5.59004	10.0363	This paper
Potrero Las Colonias	-32.6093	-69.3621	302	7	male	23-34					cranium	NA	0.707358	1.316e-05	3.22304	-14.0938	-6.29071	9.99366	This paper
Potrero Las Colonias	-32.6093	-69.3621	302		male	23-34				AR0191	PM2i Mx	NA	0.707337	1.036e-05	3.29965	-15.991	-4.86548	10.7108	This paper
Potrero Las Colonias	-32.6093	-69.3621	303	8	female	35-49					cranium	NA	0.707223	1.214e-05	3.2484	-12.8666	-4.26664	10.9668	This paper
Potrero Las Colonias	-32.6093	-69.3621	303		female	35-49				AR0190	M3 Mx	NA	0.707223	1.214e-05	3.25821	NA	NA	NA	This paper
Potrero Las Colonias	-32.6093	-69.3621	307	9	ND	adult	747	19	D-AMS 047822		mandible	NA	0.707387	1.282e-05	3.24454	-13.2763	-4.37877	10.2143	This paper
Potrero Las Colonias	-32.6093	-69.3621	307		ND	adult				AR0188	M2i Md	NA	0.707904	1.648e-05	3.38002	-12.3958	-4.96245	9.53986	This paper
Potrero Las Colonias	-32.6093	-69.3621	308	10	male	adult					atlas	NA	0.707225	1.62e-05	3.35632	-12.6015	-5.13022	10.4506	This paper
Potrero Las Colonias	-32.6093	-69.3621	308		male	adult					canine	NA	0.708135	1.172e-05	3.29075	-11.9926	-5.66183	10.9314	This paper
Potrero Las Colonias	-32.6093	-69.3621	387	11	ND	adult					cranium	right	0.707241	3.2e-05	3.22241	-12.5153	-3.80367	10.0821	This paper
Potrero Las Colonias	-32.6093	-69.3621	387		ND	adult	667	27	CIRAM-5976	AR0504	petrous	right	0.707318	1.418e-05	3.27895	-13.5525	-6.44946	10.6171	This paper
Potrero Las Colonias	-32.6093	-69.3621	471 (s/letra 1)		ND	subadult				AR0526	petrous	left	0.70733	1.066e-05	3.30205	-15.4664	-7.20105	10.7732	This paper
Potrero Las Colonias	-32.6093	-69.3621	471 (s/letra 2)		ND	subadult				AR0527	petrous	left	0.707238	2.08e-05	3.29949	-11.3892	-4.79854	11.3082	This paper
Potrero Las Colonias	-32.6093	-69.3621	471 (s/letra 3)		ND	subadult				AR0528	petrous	left	NA		NA	NA	NA	NA	This paper
Potrero Las Colonias	-32.6093	-69.3621	471a		ND	subadult	739	19	D-AMS 047823	AR0505	petrous	left	0.707307	1.042e-05	3.31036	-11.2381	-5.00721	11.6694	This paper
Potrero Las Colonias	-32.6093	-69.3621	471b		ND	subadult				AR0506	petrous	left	0.707244	1.424e-05	3.22369	-10.8053	-3.43725	11.2135	This paper
Potrero Las Colonias	-32.6093	-69.3621	471k		ND	subadult	646	30	CIRAM-11746	AR0510	petrous	left	0.707234	9.12e-06	3.23748	-10.5791	-4.83859	12.5374	This paper
Potrero Las Colonias	-32.6093	-69.3621	471m		ND	subadult				AR0511	petrous	left	0.707183	1.364e-05	3.33953	-10.694	-4.08128	10.1987	This paper
Potrero Las Colonias	-32.6093	-69.3621	809	12	female	adult					cranium	ND	0.707171	1.794e-05	3.22098	-12.7127	-4.52294	10.029	This paper
Potrero Las Colonias	-32.6093	-69.3621	809		female	adult				AR0503	petrous	right	0.707925	2.88e-05	3.32588	-12.6423	-4.62177	10.7587	This paper
Potrero Las Colonias	-32.6093	-69.3621	810a	13	male	adult	850	21	D-AMS 047821		mandible	NA	0.707351	1.198e-05	3.27586	-12.05	-3.76148	9.79798	This paper
Potrero Las Colonias	-32.6093	-69.3621	810a		male	adult				AR0185	M2i Md	NA	0.707618	1.014e-05	3.26858	-16.1115	-4.66124	7.58726	This paper
Potrero Las Colonias	-32.6093	-69.3621	811	14	male	adult					cranium	right	0.707361	1.072e-05	3.25366	-15.8483	-5.51094	8.38766	This paper
Potrero Las Colonias	-32.6093	-69.3621	811		male	adult	682	25	D-AMS 033194	AR0512	petrous	right	0.707449	1.292e-05	3.27266	-12.0491	-6.02225	10.002	This paper
Potrero Las Colonias	-32.6093	-69.3621	lote Petr. Der. #2	15	ND	adult					cranium	right	0.707335	9.98e-06	3.32082	-12.7072	-5.27338	10.104	This paper
Potrero Las Colonias	-32.6093	-69.3621	lote Petr. Der. #2		ND	adult	686	29	CIRAM-11748	AR0514	petrous	right	0.707365	2.42e-05	3.24363	-13.5478	-6.17028	10.4329	This paper
Potrero Las Colonias	-32.6093	-69.3621	lote Petr. Der. #8	16	ND	adult					cranium	right	0.709236	1.338e-05	3.30949	-13.8695	-7.44934	6.40384	This paper
Potrero Las Colonias	-32.6093	-69.3621	lote Petr. Der. #8		ND	adult	671	30	CIRAM-11749	AR0520	petrous	right	0.709335	1.236e-05	3.24678	-13.4691	-5.4796	7.25628	This paper
Potrero Las Colonias	-32.6093	-69.3621	lote Petr. Der. #11	17	ND	adult					cranium	right	0.707304	1.316e-05	3.24226	-13.559	-5.6677	10.8222	This paper
Potrero Las Colonias	-32.6093	-69.3621	lote Petr. Der. #11		ND	adult	709	30	CIRAM-11747	AR0523	petrous	right	0.707402	1.54e-05	3.24045	-14.559	-5.78855	9.99054	This paper
Potrero Las Colonias	-32.6093	-69.3621	S/N		ND	ND				AR0197	C Mx	ND	NA			-13.47	-5.4796	7.25628	This paper
Potrero Las Colonias	-32.6093	-69.3621	s/n		ND	subadult					1st metatarsal		0.707251	1.136e-05	3.17365	-9.00477	-3.97359	8.86584	Barberena et al. 2020
Potrero Las Colonias	-32.6093	-69.3621	s/n		ND	adult	634	28	D-AMS-031415		1st metatarsal		0.70732	1.058e-05	3.33628	-12.2594	-4.89845	9.19508	Barberena et al. 2020
Potrero Las Colonias	-32.6093	-69.3621	s/n		ND	adult					1st metatarsal		0.707343	1.582e-05	3.01315	-11.9778	-4.68924	9.48008	Barberena et al. 2020
Potrero Las Colonias	-32.6093	-69.3621	s/n		ND	adult					1st metatarsal		0.707252	1.096e-05	3.04708	-11.2423	-4.45012	9.77742	Barberena et al. 2020
Potrero Las Colonias	-32.6093	-69.3621	s/n		ND	adult					1st metatarsal		0.707407	1.494e-05	3.00499	-12.2724	-5.5201	9.53255	Barberena et al. 2020
Potrero Las Colonias	-32.6093	-69.3621	s/n		ND	adult					1st metatarsal		0.707243	1.066e-05	3.32206	-11.0369	-4.38626	9.62412	Barberena et al. 2020
Potrero Las Colonias	-32.6093	-69.3621	s/n		ND	adult					1st metatarsal		0.707401	1.128e-05	3.32712	-12.9528	-6.39745	9.727	Barberena et al. 2020
Potrero Las Colonias	-32.6093	-69.3621	MMy-284		female	35-49	568	38	AA-66564		lower molar	left	NA			-11	-4.2	10	Gil et al. 2009
Potrero Las Colonias	-32.6093	-69.3621	MMy-293		male?	35-49					rib	ND	NA		3.2	-10.4	-4.2	9.6	Gil et al. 2014
Potrero Las Colonias	-32.6093	-69.3621	Mmy-440		ND	35-49					ND		NA		3.2	-11.7	-4	9.5	Gil et al. 2014
Túmulo III	-32.5872	-69.3602	1145		ND	1 month-4 years	750	28	CIRAM-7970		astragalous		0.708999	1.14e-05		NA	NA	NA	This paper
Túmulo III	-32.5872	-69.3602	1146		ND	1 month-4 years	669	29	CIRAM-7971		astragalous		0.709	1.208e-05		NA	NA	NA	This paper
Túmulo III	-32.5872	-69.3602	1138a		ND	adult					astragalous	right	0.709206	1.666e-05		NA	NA	NA	This paper
Túmulo III	-32.5872	-69.3602	1134b		ND	adult					astragalous	right	0.708691	1.248e-05		NA	NA	NA	This paper
Túmulo III	-32.5872	-69.3602	1143		ND	adult					astragalous	right	0.708919	1.126e-05		NA	NA	NA	This paper
Túmulo III	-32.5872	-69.3602	1144		ND	adult					astragalous	right	0.708878	1.21e-05		NA	NA	NA	This paper
Túmulo III	-32.5872	-69.3602	1147		ND	adult					astragalous	right	0.709052	1.732e-05		NA	NA	NA	This paper
Túmulo III	-32.5872	-69.3602	1148		ND	adult					astragalous	right	0.709138	1.59e-05		NA	NA	NA	This paper
Túmulo III	-32.5872	-69.3602	1149		ND	adult					astragalous	right	0.707216	1.008e-05		NA	NA	NA	This paper
Túmulo III	-32.5872	-69.3602	1014a		ND	adult					PM2	left	0.708397	1.038e-05		NA	NA	NA	This paper
Túmulo III	-32.5872	-69.3602	1013		ND	5-11					M1	left	0.707891	1.72e-05		NA	NA	NA	This paper
Túmulo III	-32.5872	-69.3602	s/n		ND	adult					1st metatarsal		0.708955	1.434e-05	3.14848	-11.2964	-6.26994	9.59737	Barberena et al. 2020
Túmulo III	-32.5872	-69.3602	s/n		ND	adult	753	20	D-AMS 047824		1st metatarsal		0.70879	1.212e-05	3.1362	-12.6452	-6.87477	9.57782	Barberena et al. 2020
Túmulo III	-32.5872	-69.3602	s/n		ND	adult	784	19	D-AMS 047825		1st metatarsal		0.707267	9.26e-06	3.05095	-12.9448	-6.41663	8.33494	Barberena et al. 2020
Túmulo III	-32.5872	-69.3602	1097		ND	adult	671	40	AA-66566		NA		NA		3.2	-11.2	-3.4	7.8	Gil et al. 2009
Túmulo III	-32.5872	-69.3602	1164		ND	35-49					NA		NA		3.2	-11.4	-6.5	10.2	Gil et al. 2014
Túmulo III	-32.5872	-69.3602	1156-57a		ND	35-49					NA		NA		3.2	-11.8	-4.3	9.4	Gil et al. 2014
Túmulo III	-32.5872	-69.3602	1156-57b		ND	subadult					NA		NA		3.2	-11.3	-5.9	10.3	Gil et al. 2014
Túmulo III	-32.5872	-69.3602	1156-57c		ND	adult					NA		NA		3.2	-11.9	-6.7	9.9	Gil et al. 2014
Túmulo I	-32.587183°	-69.360283°	232		female	5-11	987	29	CIRAM-7972		M3	right	0.709801	1.44e-05	NA	NA	NA	NA	This paper
Túmulo I	-32.587183°	-69.360283°	226		ND	adult	1043	29	CIRAM-7973		M1	left	0.708741	1.17e-05	NA	NA	NA	NA	This paper
Túmulo I	-32.587183°	-69.360283°	234		ND	adult					M2	right	0.708959	1.158e-05	NA	NA	NA	NA	This paper
Túmulo I	-32.587183°	-69.360283°	235		ND	adult					M2	left	0.708872	1.05e-05	NA	NA	NA	NA	This paper
Túmulo I	-32.587183°	-69.360283°	A		ND	adult					1st metatarsal	left	0.709275	9.06e-06	NA	NA	NA	NA	This paper
Túmulo I	-32.587183°	-69.360283°	B		ND	adult					1st metatarsal	left	0.709157	8.8e-06	NA	NA	NA	NA	This paper
Túmulo I	-32.587183°	-69.360283°	C		ND	adult					1st metatarsal	left	0.709242	9.86e-06	NA	NA	NA	NA	This paper
Túmulo I	-32.587183°	-69.360283°	D		ND	adult					1st metatarsal	left	0.709166	9.7e-06	NA	NA	NA	NA	This paper
Túmulo I	-32.587183°	-69.360283°	E		ND	adult					1st metatarsal	left	0.709266	1.092e-05	NA	NA	NA	NA	This paper
Túmulo I	-32.587183°	-69.360283°	F		ND	adult					1st metatarsal	left	0.709512	9.24e-06	NA	NA	NA	NA	This paper
Túmulo I	-32.587183°	-69.360283°	s/n		ND	adult					1st metatarsal		0.709443	1e-05	3.17947	-16.9449	-11.4298	9.228	Barberena et al. 2020
Túmulo I	-32.587183°	-69.360283°	s/n		ND	young adult					1st metatarsal		0.709378	1.028e-05	3.18827	-16.8227	-11.6073	8.78353	Barberena et al. 2020
Túmulo I	-32.587183°	-69.360283°	s/n		ND	adult					1st metatarsal		0.709528	1.354e-05	3.13571	-16.6523	-9.56077	9.82886	Barberena et al. 2020
Túmulo I	-32.587183°	-69.360283°	s/n		ND	adult					1st metatarsal		0.709156	1.128e-05	3.21987	-17.1503	-12.2913	10.4184	Barberena et al. 2020
Túmulo I	-32.587183°	-69.360283°	229		ND	>49	977	35	AA-66568		cranium	NA	NA		3.2	-16.4	-11	9.7	Gil et al. 2009
Túmulo I	-32.587183°	-69.360283°	203-204b		ND	35-49					NA		NA		3.2	-15.7	-11.8	10.1	Gil et al. 2014
Túmulo I	-32.587183°	-69.360283°	220		ND	35-49					NA		NA		3.2	-13.3	-8.3	10.1	Gil et al. 2014
Agua de las Avispas	-33.0736	-69.1287	1209		ND	adult	579	28	CIRAM-7986		cranium	NA	0.707742	9.36e-06		-14.5479	-7.02585	7.35412	This paper
Barrancas B6	-33.0932	-68.7464	2	18	male?	35-49					rib		0.706504	1.072e-05		-17.3	-10.9	8.6	This paper
Barrancas B6	-33.0932	-68.7464	2		male?	35-49					C	left	0.707126	9.88e-06					This paper
Barrancas B6	-33.0932	-68.7464	4	19	female	17-23					rib		0.706506	1.24e-05		-17.9	-11.6	8.4	This paper
Barrancas B6	-33.0932	-68.7464	4		male	17-23				AR0147	I2	right	0.707418	1e-05		-18.1	-11.6	7.8	This paper
Barrancas B6	-33.0932	-68.7464	5		male	35-49	2260	80	LP-2387	AR0148	I2	left	0.706925	1.34e-05		-18.8	-11.8	7.8	This paper
Barrancas B6	-33.0932	-68.7464	10		ND	35-49					metatarsal		0.706635	1.294e-05		-18.1	-12.7	8.3	This paper
Barrancas B6	-33.0932	-68.7464	12	20	female?	35-49					rib		0.706559	1.63e-05		-17.9	-12.1	9	This paper
Barrancas B6	-33.0932	-68.7464	12		male	35-49	2246	28	CIRAM-5978	AR0149	I2	right	0.707566	9.22e-06	3.04	-18.24	NA	10.57	This paper
Barrancas B6	-33.0932	-68.7464	14		male?	35-49					rib		0.706519	1.312e-05		-18	-12.2	7.5	This paper
Barrancas B6	-33.0932	-68.7464	16		ND	5-11					I2	left	0.706668	9.12e-06		-17.5	-12	9	This paper
Barrancas B6	-33.0932	-68.7464	20	21	male	>49					rib		0.706619	1.568e-05					This paper
Barrancas B6	-33.0932	-68.7464	20		male	>49					I2	right	0.706751	1.084e-05					This paper
Barrancas B6	-33.0932	-68.7464	23		female	35-49					metatarsal		0.706523	1.466e-05	3.36	-18.47	-10.45	9.29	This paper
Barrancas B6	-33.0932	-68.7464	26		female	23-34					I2	left	0.706689	8.88e-06					This paper
Barrancas B6	-33.0932	-68.7464	30		male	>49	2450	60	LP-3110	AR0152	I2	right	0.706924	9.38e-06	3.19	-18.44	NA	10.05	This paper
Barrancas B6	-33.0932	-68.7464	33		male	>49	2316	20	D-AMS 047826	AR0153	I2	left	0.706816	1.496e-05	3.13	-18.45	NA	9.08	This paper
Barrancas B6	-33.0932	-68.7464	19	22	male	>49				AR0151	I2		0.70754		3.15	-17.87	-8.93	10.47	Barberena et al. 2017
Barrancas B6	-33.0932	-68.7464	19		male	>49	2251	49	AA-98707		rib		0.70665		3.06	-17.43	-11.72	9.48	Barberena et al. 2017
Barrancas B6	-33.0932	-68.7464	25	23	male	35-49					M		0.70697		3.21	-18.04	-10.63	7.47	Barberena et al. 2017
Barrancas B6	-33.0932	-68.7464	25		male	35-49					rib		0.70661		3.35	-17.25	-10.33	8.38	Barberena et al. 2017
Barrancas B6	-33.0932	-68.7464	24		male	35-49					rib		NA		3.33	-18.19	-11.28	7.88	Gil et al. 2014
Barrancas B6	-33.0932	-68.7464	25bis		ND	5-11					rib		NA		3.19	-18.31	-9.11	7.6	Gil et al. 2014
Barrancas B6	-33.0932	-68.7464	11		ND	5-11					1st metatarsal		NA		3.36	-18.76	-12.02	8.4	Gil et al. 2014
Barrancas B6	-33.0932	-68.7464	1		male	35-49	2336	20	D-AMS 047827		canine		NA			-17.9	-11.6	8.4	Gil et al. 2014
Túmulo II	-32.5872	-69.3602	236		ND	1 month-4 years				AR0868	rib		NA		3.03	-11.26	-7.63	14.03	Barberena et al. 2020
Túmulo II	-32.5872	-69.3602	237		ND	1 month-4 years					rib		0.708931	9.56e-06	3.1	-13.57	NA	5.18	Barberena et al. 2020
Túmulo II	-32.5872	-69.3602	238		female?	4-11					incisive		0.709073	1.244e-05	3.24	-13.11	-4.42	10.1	Barberena et al. 2020
Túmulo II	-32.5872	-69.3602	239		female	>49	1269	35	AA-66561		rib		0.709188	1.232e-05	3.2	-11.9	-7.5	8.7	Barberena et al. 2020
Túmulo II	-32.5872	-69.3602	239		female	>49				AR0180	I2		0.708635	1.178e-05		NA	NA	NA	Barberena et al. 2020
Túmulo II	-32.5872	-69.3602	240	24	male	35-49					rib		0.709019	1.178e-05	3.2	-11.9	-7.4	9.1	Barberena et al. 2020
Túmulo II	-32.5872	-69.3602	240		male	35-49				AR0181	I2	right	0.708342	1.34e-05		NA	NA	NA	Barberena et al. 2020
Túmulo II	-32.5872	-69.3602	241		ND	35-49					rib		0.709164	1.419e-05	3.2	-11.8	-7	9.9	Barberena et al. 2020
Túmulo II	-32.5872	-69.3602	242	25	male	17-23					rib		0.709002	1.462e-05	3.2	-10.5	-5	9.7	Barberena et al. 2020
Túmulo II	-32.5872	-69.3602	242		male	17-23				AR0182	I2	right	0.708639	1.004e-05	3.9	-15.53	-5.54	10.22	Barberena et al. 2020
Túmulo II	-32.5872	-69.3602	243	26	female	35-49				AR0183	incisive		0.708497	9.84e-06	3.07	-13.33	-10.4	NA	Barberena et al. 2020
Túmulo II	-32.5872	-69.3602	243		female	35-49	1178	41	AA-66565		calcaneum		0.709098	1.296e-05	NA	-12.1	NA	10.1	Gil et al. 2009; Barberena et al. 2020
Túmulo II	-32.5872	-69.3602	244		female	35-49					molar		0.709026	1.17e-05		NA	NA	NA	Barberena et al. 2020
Túmulo II	-32.5872	-69.3602	245	27	male	35-49					rib		0.709038	1.244e-05		-12.4		9.8	Gil et al. 2009; Barberena et al. 2020
Túmulo II	-32.5872	-69.3602	245		male	35-49	1303	29	CIRAM-12420	AR0184	I2	right	0.709035	1.446e-05	3.2	-16.47		9.84	Barberena et al. 2020
Usina Sur 2	-32.6343	-69.3744	1		ND	ND	772	25	D-AMS 033193		rib		0.707462	1.174e-05	3.29727	-13.7344	-7.93459	9.5058	Barberena et al. 2020
Usina Sur 2	-32.6343	-69.3744	2		ND	ND					molar		0.707504	1.126e-05	3.03344	-15.0641	NA	10.3515	Barberena et al. 2020
Barrio Ramos I	-32.5913	-69.3442	1	29	male?	35-49	583	43	AA-98708		rib		0.709582	1.184e-05		-15.9	-9.4	10.1	Barberena et al. 2020
Barrio Ramos I	-32.5913	-69.3442	1		male?	35-49				AR0159	I1dMx		0.709333	1.02e-05	3.3	-15.86	-9.4	10.29	Barberena et al. 2020
Barrio Ramos I	-32.5913	-69.3442	2	30	male	35-49	387	29	CIRAM-12420	AR0160	M3i Mx		0.70901		3.31	-15.05	-4.38	8.99	Barberena et al. 2017
Barrio Ramos I	-32.5913	-69.3442	2		male	35-49					rib		0.70953		3.09	-14.5	-11.02	8.69	Barberena et al. 2017
Barrio Ramos I	-32.5913	-69.3442	3	31	female	35-49				AR0161	Cd Md		0.70865		3.12	-11.58	-10.02	8.95	Barberena et al. 2017
Barrio Ramos I	-32.5913	-69.3442	3		female	35-49					rib		0.70922		3.05	-15.05	-10.08	8.7	Barberena et al. 2017
