# Supplementary material for: Local agricultural transition, crisis and migration in the Southern Andes
Source: Research Square preprint supplement (doi:10.21203/rs.3.rs-6450570/v1), 2025-05-05
Supplement: Supplementary file 2 [file 4bfd12b464c071b3dd795ff3.xlsx]

## Sheet: Roedores
N	Localidad	Site	Context	Geological unit	Código Sr	87Sr/86Sr	Desvío	Latitude	Longitude	Taxon	Element
1	San Carlos	COINCE		Active foreland	ACL-5425	0.70732		-33.6712	-68.9857	Rodentia
2	Barrancas	Barrancas B61		Active foreland	ACL-5427	0.70666		-33.0953	-68.747	Rodentia
3	Barrancas	Barrancas B61	ca, 2000	Active foreland	UCT14	0.70692	0.00016	-33.0953	-68.747	Galea sp.
4	Barrancas	Barrancas B61	ca, 2000	Active foreland	UCT15	0.70681	0.00016	-33.0953	-68.747	Galea sp.
5	Godoy Cruz	Natania	ca, 2000	Active foreland	UCT16	0.70704	0.00016	-32.9191	-68.8502	Galea sp.
6		Divisadero	recent	Active foreland	11	0.70747	0.00015	-32.8773	-68.917	Ctenomys sp.
7	Godoy Cruz	Natania		Active foreland	#26	0.706979	1.344e-05	-32.9191	-68.8502	Rodentia
8	Godoy Cruz	Natania		Active foreland	#27	0.706986	1.272e-05	-32.9191	-68.8502	Rodentia
9	Lavalle	Lavalle		Active foreland	#30	0.707564	1.238e-05	-32.3964	-67.8513	Rodentia
10	Lavalle	Lavalle		Active foreland	#31	0.707494	1.232e-05	-32.3964	-67.8513	Rodentia
11	Capiz Alto	Capiz Alto		Active foreland	#36	0.707015	8.96e-06	-33.6689	-68.9784	Rodentia
12	Capiz Alto	Capiz Alto		Active foreland	#37	0.707507	1.324e-05	-33.6689	-68.9784	Rodentia
13	Barrancas	Barrancas B6		Active foreland	#38	0.706543	1.226e-05	-33.0932	-68.7464	Rodentia
14	Los Vilos	Los Vilos		Coast	#1	0.708395	1.048e-05	-31.9115	-71.5103	Rodentia
15	Los Vilos	Los Vilos		Coast	#2	0.708706	1.118e-05	-31.9115	-71.5103	Rodentia
16	Los Vilos	Los Vilos		Coast	#4	0.709022	1.196e-05	-31.9115	-71.5103	Rodentia
17	Los Vilos	Los Vilos		Coast	#5	0.708593	1.172e-05	-31.9115	-71.5103	Rodentia
18	Los Vilos	Los Vilos		Coast	#6	0.708885	1.238e-05	-31.9115	-71.5103	Rodentia
19	Los Vilos	Los Vilos		Coast	#7	0.708999	8.66e-06	-31.9115	-71.5103	Rodentia
20	Los Vilos	Los Vilos		Coast	#9	0.708898	9.58e-06	-31.9115	-71.5103	Rodentia
21	Los Vilos	Los Vilos		Coast	#10	0.709019	1.038e-05	-31.9115	-71.5103	Rodentia
22		LEP-C	C, 9/6 50-55 cm	Coast	#39	0.708572	1.106e-05	-33.5037	-71.6097	Myocastor coipus	maxilar
23		LEP-C	C, -8/23 40-50 cm	Coast	#40	0.708197	1.02e-05	-33.5037	-71.6097	Octodon sp.	mandíbula
24		LEP-C	C, 9/8 33-50 cm	Coast	#41	0.708566	1.104e-05	-33.5037	-71.6097	Octodon sp.	mandíbula
25		Arévalo 2	C, 53 110-120 cm	Coast	#42	0.707365	1.524e-05	-33.5718	-71.5946	Octodon sp.	mandíbula
26		Arévalo 2	C, E1A 70-80 cm	Coast	#43	0.707754	1.136e-05	-33.5718	-71.5946	Octodon sp.	húmero y fémur
27		RML-015	B1 50-60 cm	Coastal Cordillera	#44	0.704151	1.01e-05	-33.2692	-70.8833	Octodon sp.	mandíbula
28		E-101-3	C,1 10-20 cm	Coastal Cordillera	#45	0.70632	1.062e-05	-33.6944	-70.9647	Rodentia	tibia
29		RML-008	C, 2A 0-15 cm	Coastal Cordillera	#46	0.70415	1.256e-05	-33.2642	-70.8969	Octodon sp.	mandíbula
30		Cerro Chena	C, 9A 20-25 cm	Coastal Cordillera	#47	0.705305	1.286e-05	-33.6154	-70.7469	Myocastor coipus	diente
31		E-101-1	C,2 / R2	Coastal Cordillera	#48	0.705072	1.21e-05	-33.6723	-70.9604	Myocastor coipus	diente
32	Las Cuevas	Las Cuevas Site 1	recent	E Principal Cordillera	1	0.70567	0.00017	-32.8134	-70.0358	Eligmodontia sp.
33	Las Cuevas	Las Cuevas Site 2	ca, 700	E Principal Cordillera	2	0.70567	0.00018	-32.8134	-70.0358	Eligmodontia sp.
34	Parque Aconcagua	Aconcagua Site 1	recent	E Principal Cordillera	3	0.70557	0.00017	-32.705	-69.9654	Rodentia
35	Las Cuevas	Las Cuevas		E Principal Cordillera	#16	0.705557	1.38e-05	-32.8134	-70.0358	Rodentia
36	Las Cuevas	Las Cuevas		E Principal Cordillera	#17	0.705566	1.146e-05	-32.8134	-70.0358	Rodentia
37	Las Cuevas	Las Cuevas		E Principal Cordillera	#18	0.705276	1.022e-05	-32.8134	-70.0358	Rodentia
38	Laguna del Diamante	Laguna del Diamante		E Principal Cordillera	#28	0.707028	1.014e-05	-34.1972	-69.7053	Rodentia
39	Laguna del Diamante	Laguna del Diamante		E Principal Cordillera	#29	0.706	1.288e-05	-34.1972	-69.7053	Rodentia
40	Laguna del Diamante	Gendarmería, L. Diamante		Frontal Cordillera	ACL-5426	0.70655		-34.1905	-69.7114	Rodentia
41	Potrerillos	Quebrada de La Manga	ca, 1000	Frontal Cordillera	4	0.70799	0.00018	-32.9442	-69.3164	Ctenomys sp.
42		ARQ-18	3000-1500	Frontal Cordillera	6	0.70619	0.00018	-29.3306	-69.904816	Akodon sp.
43		ARQ-24	recent	Frontal Cordillera	5	0.70609	0.00017	-29.3251	-69.9017	Phyllotis sp.
44		ARQ 18		Frontal Cordillera	#14	0.7068	1.51e-05	-29.3306	-69.904816	Rodentia
45		ARQ 18		Frontal Cordillera	#15	0.707735	9.66e-06	-29.3306	-69.904816	Rodentia
46	Potrerillos	La Manga		Frontal Cordillera	#21	0.707626	1.388e-05	-32.9442	-69.3164	Rodentia
47	Potrerillos	La Manga		Frontal Cordillera	#22	0.70775	1.018e-05	-32.9442	-69.3164	Rodentia
48	Paramillos	Paramillos		Frontal Cordillera	#32	0.707288	8.42e-06	-32.4822	-69.135	Rodentia
49	Paramillos	Paramillos		Frontal Cordillera	#33	0.707579	1.078e-05	-32.4822	-69.135	Rodentia
50	Los Morrillos	Los Morrillos		Frontal Cordillera	50	0.707511	1.398e-05	-31.7128	-69.7373	Cricetidae	teeth
51	Los Morrillos	Los Morrillos		Frontal Cordillera	51	0.707799	1.148e-05	-31.7128	-69.7373	Cricetidae	teeth
52	Agua de la Cueva	Agua de la Cueva	ca, 470	Precordillera	7	0.71008	0.00017	-32.617	-69.1636	Phyllotis sp.
53	Agua de la Cueva	Agua de la Cueva	ca, 8200	Precordillera	8	0.71016	0.00016	-32.617	-69.1636	Ctenomys sp.
54	Potrerillos	Los Conitos rockshelter 1	ca, 1500	Precordillera	9	0.71026	0.00017	-32.9609	-69.1567	Galea sp.
55	Potrerillos	Los Conitos rockshelter 2	ca, 1000	Precordillera	10	0.7095	0.00016	-32.9609	-69.1567	Phyllotis sp.
56	Agua de la Cueva	Agua de la Cueva		Precordillera	#12	0.71048	1.424e-05	-32.617	-69.1636	Rodentia
57	Agua de la Cueva	Agua de la Cueva		Precordillera	#13	0.710039	1.062e-05	-32.617	-69.1636	Rodentia
58	Potrerillos	Los Conitos		Precordillera	#19	0.710907	1.088e-05	-32.9609	-69.1567	Rodentia
59	Potrerillos	Los Conitos		Precordillera	#20	0.709528	1.186e-05	-32.9609	-69.1567	Rodentia
60	Potrerillos	San Ignacio	ca, 1400	Valleys	12	0.7091	0.00016	-32.9561	-69.1783	Galea sp.
61	Potrerillos	San Ignacio		Valleys	#24	0.70823	1.582e-05	-32.9561	-69.1783	Rodentia
62	Potrerillos	San Ignacio		Valleys	#25	0.710457	1.166e-05	-32.9561	-69.1783	Rodentia
63	Uspallata	Alero Tunduqueral		Valleys	ACL-5428	0.70864	1.142e-05	-32.5303	-69.314	Rodentia
64	Uspallata	Alero Tunduqueral	Late Holocene	Valleys	13	0.70849	0.00016	-32.5303	-69.314	Ctenomys sp.
65	Uspallata	Barrio Ramos		Valleys	#23	0.709194	1.088e-05	-32.5913	-69.3441	Rodentia
66		Los Azules 1		W Principal Cordillera	ACL-5429	0.70393	1.142e-05	-33.6151	-70.4127	Rodentia
67		Manzano 1		W Principal Cordillera	ACL-5430	0.70396	1.142e-05	-33.5634	-70.4428	Rodentia
68		Los Queltehues		W Principal Cordillera	ACL-5431	0.70401	1.142e-05	-33.9018	-70.1889	Rodentia
69	Combarbalá	Combarbalá		W Principal Cordillera	#3	0.704083	1.142e-05	-31.1895	-70.9965	Rodentia
70	Combarbalá	Combarbalá		W Principal Cordillera	#8	0.704131	1.196e-05	-31.1895	-70.9965	Rodentia
71		Alero Paulino Gonzalez		W Principal Cordillera	#11	0.704249	9.02e-06	-31.5459	-70.8366	Rodentia
72	Cachaco	Cachaco		W Principal Cordillera	44	0.704604	1.238e-05	-30.3829	-71.0005	Rodentia
73	Cachaco	Cachaco		W Principal Cordillera	45	0.704657	9.02e-06	-30.3829	-71.0005	Rodentia
74	S. Pedro Viejo de Pichasca	S. Pedro Viejo de Pichasca		W Principal Cordillera	46	0.706343	1.668e-05	-30.3916	-70.8851	Rodentia
75	S. Pedro Viejo de Pichasca	S. Pedro Viejo de Pichasca		W Principal Cordillera	47	0.705142	1.008e-05	-30.3916	-70.8851	Rodentia
76	Hurtado	Hurtado		W Principal Cordillera	48	0.707603	2.68e-05	-30.4747	-70.4954	Rodentia
77	Hurtado	Hurtado		W Principal Cordillera	49	0.705298	1.164e-05	-30.4747	-70.4954	Rodentia
78	Punta del Barro	Basurero 8	pila zaranda	Valleys	#58	0.708704	11.28	-30.026	-69.1729	Ctenomys sp.	tooth
79	Punta del Barro	Basurero 7	pila zaranda	Valleys	#59	0.708673	12.86	-30.026	-69.1729	Ctenomys sp.	tooth
80	Punta del Barro	Basurero 3		Valleys	#60	0.708808	11.68	-30.026	-69.1729	Rodent	bone
81	Angualasto	Punta del Barro		Valleys	#62	0.708914	9.22	-30.026	-69.1729	Rodent	bone
82	Punta del Barro	Basurero 4		Valleys	#63	0.708484	14.44	-30.026	-69.1729	Rodent	bone
83	Calingasta	Los Morrillos. Gruta II	Cuad. A	Frontal Cordillera	#64	0.706009	11.08	-31.7128	-69.7373	large rodent	tooth
84	Calingasta	Cerro Calvario		Precordillera	#65	0.708689	12.92	-31.3433	-69.4249	Rodentia	bone
85	Calingasta	Cerro Calvario	Cuad. E	Precordillera	#66	0.708523	12.6	-31.3433	-69.4249	Rodentia	bone
86	Precordillera Angualasto	Percha de ave rapaz		Precordillera	#68	0.7095	14.6	-29.8827	-68.8946	Rodentia	bone
87	Precordillera Angualasto	Percha de ave rapaz		Precordillera	#69	0.708273	11.82	-29.8827	-68.8946	Rodentia	bone
88	El Carrizal	Finca Brizuela	modern farm	Precordillera	#70	0.708657	12.24	-30.0116	-69.0653	Ovis sp.	bone
89	Precordillera Angualasto	Percha de ave rapaz		Precordillera	#71	0.709255	13.36	-29.8827	-68.8946	Rodentia	bone
90	Precordillera Angualasto	Percha de ave rapaz		Precordillera	#72	0.708259	14.5	-29.8827	-68.8946	Rodentia	bone
91	Punta del Barro	Casa del Fogón	Cuadricula 1, capa 7, extraccion 3	Valleys	#74	0.708374	14.7	-30.0257	-69.1731	Rodentia	tooth
