# Supplementary material for: Local agricultural transition, crisis and migration in the Southern Andes
Source: Research Square preprint supplement (doi:10.21203/rs.3.rs-6450570/v1), 2025-05-05
Supplement: Supplementary file 4 [file 628631743d0aa2adf0dd4ec1.xlsx]

## Sheet: A. Conditional He on 1240K
Population	D	SE	Z	NumberSites	NumberBlocks	NumChr	Region	Color	Point	mean	x	lower	upper
Chile_StraitOfMagellan_Kaweskar_100BP.SG	0.1631152544	0.002485478752	65.62729788	36042	542	4	SouthPatagonia_LH	blue1	8	0.1764623708	1	0.1581442969	0.1680862119
Argentina_BeagleChannel_Yamana_100BP.SG	0.1738901282	0.001395106517	124.6429044	407930	557	6	SouthPatagonia_LH	blue1	1	0.1764623708	2	0.1710999152	0.1766803412
Argentina_BeagleChannel_Yamana_100BP.Capt	0.1745608836	0.00138496746	126.0397003	732266	560	6	SouthPatagonia_LH	blue1	1	0.1764623708	3	0.1717909487	0.1773308185
Argentina_NorthTierradelFuego_Selknam_500BP.Capt	0.1793239744	0.001147446822	156.2808585	768107	560	10	SouthPatagonia_LH	blue1	5	0.1764623708	4	0.1770290808	0.181618868
Argentina_MitrePeninsula_Haush_400BP.Capt	0.181145641	0.001139518255	158.9668619	686812	560	12	SouthPatagonia_LH	blue1	3	0.1764623708	5	0.1788666045	0.1834246775
Chile_Yamana_BeagleChannel_800BP.SG	0.186738343	0.001556254694	119.9921476	869650	559	4	SouthPatagonia_LH	blue1	11	0.1764623708	6	0.1836258336	0.1898508524
USA_CA_SanNicolas_4800BP.SG	0.1779507163	0.00148217071	120.0608777	982109	559	12	California_SouthernChannelIslands_MH	violet	23	0.1779507163	7	0.1749863748	0.1809150577
USA_CA_SantaRosa_7400BP.Capt	0.1820073454	0.001360704848	133.7596068	767013	559	8	California_NorthernChannelIslands_MH	violet	21	0.1820073454	8	0.1792859357	0.1847287551
USA_CA_SantaRosa_3200BP.Capt	0.1840029291	0.001621518263	113.4757056	415151	558	4	California_NorthernChannelIslands_LH	violet	5	0.1879187037	9	0.1807598925	0.1872459656
USA_CA_SantaRosa_3000BP.Capt	0.186994289	0.001394458966	134.0980936	658726	559	6	California_NorthernChannelIslands_LH	violet	3	0.1879187037	10	0.184205371	0.1897832069
USA_CA_SantaRosa_300BP.Capt	0.1899943455	0.0009585626288	198.2075452	877184	560	12	California_NorthernChannelIslands_LH	violet	4	0.1879187037	11	0.1880772203	0.1919114708
USA_CA_SanMiguel_650BP.SG	0.1906832511	0.001871287682	101.899485	87391	550	4	California_NorthernChannelIslands_LH	violet	1	0.1879187037	12	0.1869406758	0.1944258265
Brazil_JabuticabeiraII_2400BP.Capt	0.1867222223	0.0009509825354	196.3466366	1025518	559	24	Brazil_LH	palegreen1	13	0.1920288198	13	0.1848202573	0.1886241874
Brazil_Cabecuda_3200BP.Capt	0.1911430534	0.001596435865	119.7311195	170307	552	4	Brazil_LH	palegreen1	10	0.1920288198	14	0.1879501817	0.1943359252
Brazil_Limao_1900BP.Capt	0.1982211837	0.001212371745	163.498683	335504	555	8	Brazil_LH	palegreen2	1	0.1920288198	15	0.1957964402	0.2006459271
USA_CA_Goleta_900BP.Capt	0.1824704512	0.001579194904	115.5465046	367528	557	4	California_SouthernMainland_LH	palevioletred3	5	0.1935285321	16	0.1793120614	0.185628841
USA_CA_PointSal_1500BP.SG	0.1917061114	0.001223297711	156.7125563	309505	555	10	California_SouthernMainland_LH	palevioletred3	2	0.1935285321	17	0.1892595159	0.1941527068
USA_CA_Malibu_3400BP.Capt	0.2064090336	0.001919170663	107.5511613	65002	545	4	California_SouthernMainland_LH	palevioletred3	3	0.1935285321	18	0.2025706922	0.2102473749
USA_CA_Carmel_600BP.Capt	0.1966504095	0.001603002612	122.6762876	195606	552	4	California_Central_LH	palevioletred1	6	0.1968842947	19	0.1934444043	0.1998564147
USA_CA_CalaverasCounty_600BP.Capt	0.1971181799	0.0010546293	186.9075513	736132	559	10	California_Central_LH	palevioletred1	7	0.1968842947	20	0.1950089213	0.1992274385
Belize_7400BP.Capt	0.1763749847	0.001820153319	96.90116918	131056	554	4	CentralAmerica_MH	mediumvioletred	24	0.1971529231	21	0.1727346781	0.1800152914
Belize_4000BP.Capt	0.2012534819	0.005323700383	37.80330737	5744	500	4	CentralAmerica_MH	darkviolet	23	0.1971529231	22	0.1906060811	0.2119008827
Belize_4600BP.Capt	0.203079415	0.00096726155	209.9529491	826066	558	10	CentralAmerica_MH	darkviolet	22	0.1971529231	23	0.2011448919	0.2050139381
Belize_4900BP.Capt	0.2079038108	0.001148631153	181.0013687	727067	558	10	CentralAmerica_MH	darkviolet	21	0.1971529231	24	0.2056065485	0.2102010731
Migrant	0.1971699203	0.0008981763738	219.522497	1142512	560	32	Migrant	goldenrod1	21	0.1971699203	25	0.1953735676	0.1989662731
USA_CA_SanClemente_500BP.Capt	0.1914457154	0.0009408650219	203.4784065	1021266	559	16	California_SouthernChannelIslands_LH	violet	9	0.1975647954	26	0.1895639854	0.1933274455
USA_CA_SanNicolas_1600BP.SG	0.200121894	0.0009537295189	209.8308693	959850	559	22	California_SouthernChannelIslands_LH	violet	8	0.1975647954	27	0.198214435	0.2020293531
USA_CA_SanClemente_900BP.SG	0.2011267768	0.001079954115	186.2364095	692240	559	10	California_SouthernChannelIslands_LH	violet	7	0.1975647954	28	0.1989668686	0.2032866851
Peru_Lauricocha_8600BP.Capt	0.1998654222	0.001490758264	134.069639	515687	556	6	CentralAndes_EH	darkorange4	22	0.1998654222	29	0.1968839057	0.2028469388
Brazil_Sumidouro_10100BP.SG	0.1907884458	0.001256036755	151.8971837	435236	557	6	Brazil_EH	palegreen1	22	0.2003232544	30	0.1882763723	0.1933005193
Brazil_LapaDoSanto_9600BP.Capt	0.2098580629	0.001073632429	195.4654659	613934	558	10	Brazil_EH	palegreen1	21	0.2003232544	31	0.2077107981	0.2120053278
Bolivia_MiraFlores_MH.Capt	0.1875116149	0.00188590386	99.42798193	64572	546	4	CentralAndes_MiddleHorizon_LH	orange2	4	0.2006537664	32	0.1837398072	0.1912834227
Chile_CaletaHuelen_MH_1100BP.Capt	0.1983313886	0.001816168637	109.2031789	85700	550	6	CentralAndes_MiddleHorizon_LH	orange2	5	0.2006537664	33	0.1946990513	0.2019637258
Peru_Laramate_900BP.Capt	0.2023171941	0.0009692954867	208.7260251	822115	560	12	CentralAndes_MiddleHorizon_LH	orange2	8	0.2006537664	34	0.2003786031	0.204255785
Bolivia_MH_Tiwanaku.Capt	0.202676233	0.002069231754	97.94757529	45437	543	6	CentralAndes_MiddleHorizon_LH	orange2	3	0.2006537664	35	0.1985377695	0.2068146965
Bolivia_MH_Miraflores.Capt	0.2045402268	0.001291985756	158.3146144	339102	556	4	CentralAndes_MiddleHorizon_LH	orange2	2	0.2006537664	36	0.2019562553	0.2071241983
Peru_Chincha_LH.SG	0.208545941	0.0009758378077	213.7096342	1128840	559	12	CentralAndes_MiddleHorizon_LH	orange2	6	0.2006537664	37	0.2065942654	0.2104976166
Chile_Conchali_700BP.Capt	0.200673583	0.00137903546	145.5173481	635111	559	4	CentralChile_LH	brown1	1	0.200673583	38	0.1979155121	0.203431654
Mexico_SierraGorda_Postclassic.SG	0.2020679356	0.001522089661	132.7569201	656210	559	4	CentralAmerica_LH	darkviolet	3	0.2029219751	39	0.1990237562	0.2051121149
Panama_IsthmoColombian_PreColonial.SG	0.2037760147	0.001071033063	190.2611804	386704	556	18	CentralAmerica_LH	darkviolet	1	0.2029219751	40	0.2016339486	0.2059180809
Peru_Highlands_LIP_Chimu.Capt	0.1984942765	0.00122363154	162.2173587	558137	558	6	CentralAndes_LateIntermediate_LH	orange1	5	0.2032412598	41	0.1960470134	0.2009415396
Peru_Ollantaytambo_LIP.Capt	0.2005048304	0.0009837917159	203.8082118	931798	559	10	CentralAndes_LateIntermediate_LH	orange1	13	0.2032412598	42	0.198537247	0.2024724139
Peru_LIP_Pacapaccari_600BP.Capt	0.201760355	0.001341752727	150.3707433	383559	556	6	CentralAndes_LateIntermediate_LH	orange1	8	0.2032412598	43	0.1990768495	0.2044438604
Peru_Lima_LIP_650BP.Capt	0.2017844126	0.001314867471	153.4636889	234587	554	8	CentralAndes_LateIntermediate_LH	orange1	6	0.2032412598	44	0.1991546777	0.2044141475
Peru_Chanka_LIP.Capt	0.2029813889	0.001524502993	133.1459432	166030	553	4	CentralAndes_LateIntermediate_LH	orange1	4	0.2032412598	45	0.1999323829	0.2060303949
Peru_LIP_Ychsma.Capt	0.2055483392	0.002246474523	91.49818398	53890	544	4	CentralAndes_LateIntermediate_LH	orange1	9	0.2032412598	46	0.2010553902	0.2100412883
Peru_Palpa_LIP_550BP.Capt	0.2069366182	0.001479828886	139.838207	228930	554	4	CentralAndes_LateIntermediate_LH	orange1	10	0.2032412598	47	0.2039769604	0.209896276
Peru_Torontoy_500BP.Capt	0.2079198574	0.001136326125	182.9755145	709735	558	6	CentralAndes_LateIntermediate_LH	orange1	12	0.2032412598	48	0.2056472052	0.2101925097
Local_Late	0.2035813885	0.002018302586	100.8676251	68130	548	4	Local_Late	darkorange4	21	0.2035813885	49	0.1995447833	0.2076179937
Local_Early	0.2037225069	0.001676243527	121.535149	128032	554	6	Local_Early	darkorange4	23	0.2037225069	50	0.2003700198	0.2070749939
Peru_Kanamarka1_LH.Capt	0.1956429132	0.001504668763	130.0239083	718324	559	4	CentralAndes_LateHorizon_LH	darkorange2	5	0.2038522954	51	0.1926335757	0.1986522508
Peru_Qotakalli1_LH.Capt	0.2045498105	0.001223857355	167.1353361	495669	557	6	CentralAndes_LateHorizon_LH	darkorange2	10	0.2038522954	52	0.2021020957	0.2069975252
Peru_CasaConcha2_LH.Capt	0.2056421269	0.001233889941	166.6616446	689669	559	4	CentralAndes_LateHorizon_LH	darkorange2	4	0.2038522954	53	0.203174347	0.2081099068
Peru_Kusicancha1_LH.Capt	0.2062983568	0.001104120117	186.8441246	789444	559	6	CentralAndes_LateHorizon_LH	darkorange2	8	0.2038522954	54	0.2040901166	0.2085065971
Peru_Sacsahuaman2_LH.Capt	0.2071282694	0.001134790901	182.5254937	649274	558	6	CentralAndes_LateHorizon_LH	darkorange2	13	0.2038522954	55	0.2048586876	0.2093978512
USA_CA_Goleta_4700BP.Capt	0.2042022232	0.001637106562	124.7336172	213744	553	4	California_SouthernMainland_MH	palevioletred3	21	0.2042022232	56	0.2009280101	0.2074764363
Argentina_LagunaChica_6800BP.Capt	0.2025164289	0.001823234302	111.0753723	87346	548	4	Pampa_MH	lightblue	23	0.2042360197	57	0.1988699603	0.2061628975
Argentina_ArroyoSeco2_7700BP.Capt	0.2059556104	0.001195132949	172.3286188	594599	558	8	Pampa_MH	lightblue	22	0.2042360197	58	0.2035653445	0.2083458763
Peru_Ullujaya_EIP_1350BP.Capt	0.2025774873	0.001492632406	135.7182696	141378	549	4	CentralAndes_EarlyIntermediate_LH	darkorange1	5	0.2059247674	59	0.1995922225	0.2055627521
Peru_RioUncallane_1600BP.SG	0.2051211403	0.001089196156	188.3234156	1135997	560	8	CentralAndes_EarlyIntermediate_LH	darkorange1	3	0.2059247674	60	0.202942748	0.2072995326
Peru_ElBrujo_EIP_1300BP.Capt	0.2065198412	0.001515191016	136.2995418	171814	552	4	CentralAndes_EarlyIntermediate_LH	darkorange1	1	0.2059247674	61	0.2034894592	0.2095502233
Peru_EIP_Moche.Capt	0.2094806008	0.003698077544	56.64581076	12784	527	4	CentralAndes_EarlyIntermediate_LH	darkorange1	6	0.2059247674	62	0.2020844457	0.2168767558
Peru_MH_LIP_Lambayeque.Capt	0.2068504531	0.001245184548	166.120318	495938	559	6	CentralAndes_MiddleHorizonLateIntermeditae_LH	darkorange3	2	0.2068504531	63	0.204360084	0.2093408222
Belize_9400BP.Capt	0.2082565963	0.002211158106	94.18439857	54841	547	4	CentralAmerica_EH	mediumvioletred	21	0.2082565963	64	0.2038342801	0.2126789126
Argentina_Callingasta_1500BP.SG	0.209417596	0.003911884723	53.53368283	11298	526	4	Cuyo_LH	brown3	1	0.209417596	65	0.2015938266	0.2172413655

## Sheet: B. Conditional He on SG
Population	D	SE	Z	NumberSites	NumberBlocks	NumChr	Region	Color	Point	mean	x	lower	upper
USA_CA_SanNicolas_4800BP.SG	0.213707804049	0.00184104928888	116.079349608	3956126	564	12	California_SouthernChannelIslands_MH	violet	23	0.213707804049	1	0.21002570547124	0.21738990262676
Chile_StraitOfMagellan_Kaweskar_100BP.SG	0.201550723919	0.0021698263677	92.8879503537	161344	559	4	SouthPatagonia_LH	blue1	8	0.215283983215	2	0.1972110711836	0.2058903766544
Argentina_BeagleChannel_Yamana_100BP.SG	0.21727554109	0.00151478771707	143.43629714	1754330	564	6	SouthPatagonia_LH	blue1	1	0.215283983215	3	0.21424596565586	0.22030511652414
Chile_Yamana_BeagleChannel_800BP.SG	0.227025684636	0.00200588712163	113.179691015	3777044	564	4	SouthPatagonia_LH	blue1	11	0.215283983215	4	0.22301391039274	0.23103745887926
USA_CA_SanMiguel_650BP.SG	0.231396930856	0.00193223466125	119.756122533	321197	561	4	California_NorthernChannelIslands_LH	violet	1	0.231396930856	5	0.2275324615335	0.2352614001785
USA_CA_PointSal_1500BP.SG	0.236196516053	0.00124197235173	190.178562127	1276598	564	14	California_SouthernMainland_LH	palevioletred3	2	0.236196516053	6	0.23371257134954	0.23868046075646
Brazil_Sumidouro_10100BP.SG	0.237385467367	0.00153899661255	154.246906998	1607293	564	6	Brazil_EH	palegreen1	22	0.237385467367	7	0.2343074741419	0.2404634605921
Migrant	0.239663661622	0.00103283827537	232.043745219	5317502	564	32	Migrant	goldenrod1	21	0.239663661622	8	0.23759798507126	0.24172933817274
USA_CA_SanNicolas_1600BP.SG	0.241210338538	0.00108869557345	221.559033049	3839653	564	22	California_SouthernChannelIslands_LH	violet	8	0.242832801232	9	0.2390329473911	0.2433877296849
USA_CA_SanClemente_900BP.SG	0.244455263926	0.00126885083351	192.658788149	2686512	564	10	California_SouthernChannelIslands_LH	violet	7	0.242832801232	10	0.24191756225898	0.24699296559302
Local_Early	0.249512596836	0.00160507564738	155.452235067	581654	562	6	Local_Early	darkorange4	23	0.249512596836	11	0.24630244554124	0.25272274813076
Peru_RioUncallane_1600BP.SG	0.25016701436	0.00132823059245	188.34607167	5342355	564	8	CentralAndes_EarlyIntermediate_LH	darkorange1	3	0.25016701436	12	0.2475105531751	0.2528234755449
Uruguay_Rocha_PreColonial.SG	0.250897916833	0.00324565626771	77.3026766048	25058	547	4	Uruguay_LH	palegreen1	6	0.250897916833	13	0.24440660429758	0.25738922936842
Mexico_SierraGorda_Postclassic.SG	0.250225229261	0.00195678898228	127.87542833	2790490	564	4	CentralAmerica_LH	darkviolet	3	0.25102410455	14	0.24631165129644	0.25413880722556
Panama_IsthmoColombian_PreColonial.SG	0.251822979839	0.00111261167277	226.335015173	1525250	564	18	CentralAmerica_LH	darkviolet	1	0.25102410455	15	0.24959775649346	0.25404820318454
Local_Late	0.25137773032	0.0019027656467	132.111766236	273457	562	4	Local_Late	darkorange4	21	0.25137773032	16	0.2475721990266	0.2551832616134
Peru_Chincha_LH.SG	0.256452115854	0.00108355522488	236.676553225	4906530	564	12	CentralAndes_MiddleHorizon_LH	orange2	6	0.256452115854	17	0.25428500540424	0.25861922630376
Argentina_Callingasta_1500BP.SG	0.257444764649	0.00268215542804	95.9842826251	40599	553	4	Cuyo_LH	brown3	1	0.257444764649	18	0.25208045379292	0.26280907550508

## Sheet: C. Ne from hapROH
Population	N	Ne	std.err	lower	upper	Region	Color	Point	mean
Chile_LosRieles_12000BP.Capt	1	100.05995	16.571	66.91795	133.20195	CentralChile_EH	brown1	21	100.05995
USA_CA_SantaRosa_7400BP.Capt	1	133.4705	24.4835	84.5035	182.4375	California_NorthernChannelIslands_MH	violet	21	133.4705
Chile_WesternArchipelago_Kaweskar_800BP.SG	1	121.48415	21.624	78.23615	164.73215	SouthPatagonia_LH	blue1	10	190.551225
Chile_WesternArchipelago_Kaweskar_1200BP.SG	1	135.94935	25.269	85.41135	186.48735	SouthPatagonia_LH	blue1	9	190.551225
Argentina_BeagleChannel_Yamana_100BP.Capt	2	167.1719	23.4855	120.2009	214.1429	SouthPatagonia_LH	blue1	1	190.551225
Chile_NorthTierradelFuego_Selknam_100BP.Capt	1	177.45655	36.0235	105.40955	249.50355	SouthPatagonia_LH	blue1	6	190.551225
Argentina_BeagleChannel_Yamana_100BP.SG	2	180.97095	26.176	128.61895	233.32295	SouthPatagonia_LH	blue1	1	190.551225
Argentina_BeagleChannel_Yamana_1500BP.Capt	1	207.8357	45.1095	117.6167	298.0547	SouthPatagonia_LH	blue1	2	190.551225
Chile_Yamana_BeagleChannel_800BP.SG	2	208.4265	31.979	144.4685	272.3845	SouthPatagonia_LH	blue1	11	190.551225
Argentina_NorthTierradelFuego_Selknam_500BP.Capt	2	208.80295	32.0315	144.73995	272.86595	SouthPatagonia_LH	blue1	5	190.551225
Argentina_MitrePeninsula_Haush_400BP.Capt	3	230.27665	29.949	170.37865	290.17465	SouthPatagonia_LH	blue1	3	190.551225
Chile_SouthernContinent_Aonikenk_400BP.Capt	1	267.13755	64.2745	138.58855	395.68655	SouthPatagonia_LH	blue1	7	190.551225
Brazil_Cabecuda_3200BP.Capt	1	200.5675	42.7345	115.0985	286.0365	Brazil_LH	palegreen1	10	213.442825
Brazil_JabuticabeiraII_2400BP.Capt	10	226.31815	16.069	194.18015	258.45615	Brazil_LH	palegreen1	13	213.442825
Argentina_NorthTierradelFuego_LaArcillosa2_5800BP.Capt	1	177.627	36.055	105.517	249.737	SouthPatagonia_MH	blue3	21	214.1832
Chile_PuntaSantaAna_7300BP.SG	1	250.7394	59.005	132.7294	368.7494	SouthPatagonia_MH	blue3	22	214.1832
USA_CA_SanClemente_500BP.Capt	5	149.4687	12.795	123.8787	175.0587	California_SouthernChannelIslands_LH	violet	9	228.669066666667
USA_CA_SanCatalina_400BP.SG	1	228.24585	51.457	125.33185	331.15985	California_SouthernChannelIslands_LH	violet	6	228.669066666667
USA_CA_SanClemente_900BP.SG	2	308.29265	55.9355	196.42165	420.16365	California_SouthernChannelIslands_LH	violet	7	228.669066666667
Argentina_ArroyoSeco2_7700BP.Capt	2	239.1408	38.925	161.2908	316.9908	Pampa_MH	lightblue	22	239.1408
Chile_LosRieles_5100BP.Capt	1	319.7706	83.188	153.3946	486.1466	CentralChile_MH	brown1	23	319.7706
Brazil_LapaDoSanto_9600BP.Capt	4	282.9372	34.8775	213.1822	352.6922	Brazil_EH	palegreen1	21	335.9129125
Brazil_Sumidouro_10100BP.SG	2	291.32215	51.4405	188.44115	394.20315	Brazil_EH	palegreen1	22	335.9129125
Brazil_Sumidouro_10400BP.SG	1	341.0422	91.4105	158.2212	523.8632	Brazil_EH	palegreen1	22	335.9129125
Brazil_LapaDoSanto_9200BP.Capt	1	428.3501	127.3975	173.5551	683.1451	Brazil_EH	palegreen1	21	335.9129125
Migrant	9	339.42125	30.3345	278.75225	400.09025	Migrant	goldenrod1	21	339.42125
USA_CA_Goleta_4700BP.Capt	1	342.64315	91.8125	159.01815	526.26815	California_SouthernMainland_MH	palevioletred3	21	342.64315
Peru_Cuncaicha_4200BP.Capt	1	317.75785	82.7	152.35785	483.15785	CentralAndes_MH	orange4	21	388.6337
Peru_Lauricocha_5800BP.Capt	1	319.7948	83.1935	153.4078	486.1818	CentralAndes_MH	orange4	24	388.6337
Peru_Cuncaicha_3300BP_contam.Capt	1	338.06485	90.664	156.73685	519.39285	CentralAndes_MH	orange4	25	388.6337
Peru_Lauricocha_3500BP.Capt	1	578.9173	197.2605	184.3963	973.4383	CentralAndes_MH	orange4	23	388.6337
Peru_Lauricocha_8600BP.Capt	2	213.4051	33.041	147.3231	279.4871	CentralAndes_EH	darkorange4	22	394.386325
Peru_Cuncaicha_9000BP.Capt	1	575.36755	196.0955	183.17655	967.55855	CentralAndes_EH	darkorange4	21	394.386325
USA_CA_SantaRosa_3000BP.Capt	1	191.4369	40.1265	111.1839	271.6899	California_NorthernChannelIslands_LH	violet	3	397.87295
USA_CA_SantaRosa_300BP.Capt	5	351.9059	42.7035	266.4989	437.3129	California_NorthernChannelIslands_LH	violet	4	397.87295
USA_CA_SanMiguel_650BP.SG	1	469.93525	145.5865	178.76225	761.10825	California_NorthernChannelIslands_LH	violet	1	397.87295
USA_CA_SantaCruz_1000BP.SG	1	578.21375	197.03	184.15375	972.27375	California_NorthernChannelIslands_LH	violet	2	397.87295
Local_Late	1	430.96745	128.136	174.69545	687.23945	Local_Late	darkorange4	21	430.96745
USA_CA_Carmel_600BP.Capt	1	240.12695	55.254	129.61895	350.63495	California_Central_LH	palevioletred1	6	444.424566666667
USA_CA_CalaverasCounty_600BP.Capt	4	515.74195	83.5935	348.55495	682.92895	California_Central_LH	palevioletred1	7	444.424566666667
USA_CA_CalaverasCounty_1500BP.Capt	1	577.4048	196.764	183.8768	970.9328	California_Central_LH	palevioletred1	8	444.424566666667
Belize_7400BP.Capt	1	320.2348	83.3	153.6348	486.8348	CentralAmerica_MH	mediumvioletred	24	463.30665
Belize_4900BP.Capt	3	375.3335	60.6435	254.0465	496.6205	CentralAmerica_MH	darkviolet	21	463.30665
Belize_4600BP.Capt	4	694.35165	129.122	436.10765	952.59565	CentralAmerica_MH	darkviolet	22	463.30665
USA_CA_Goleta_400BP.Capt	1	397.39105	113.7985	169.79405	624.98805	California_SouthernMainland_LH	palevioletred3	6	499.609875
USA_CA_NewCuyama_1300BP.SG	1	472.1558	146.2435	179.6688	764.6428	California_SouthernMainland_LH	palevioletred3	1	499.609875
USA_CA_PointSal_1500BP.SG	1	517.668	167.785	182.098	853.238	California_SouthernMainland_LH	palevioletred3	2	499.609875
USA_CA_Goleta_900BP.Capt	2	611.22465	151.371	308.48265	913.96665	California_SouthernMainland_LH	palevioletred3	5	499.609875
Peru_Chanka_LIP.Capt	1	365.36095	101.1205	163.11995	567.60195	CentralAndes_LateIntermediate_LH	orange1	4	512.439783333333
Peru_Ollantaytambo_LIP.Capt	5	477.8172	66.7835	344.2502	611.3842	CentralAndes_LateIntermediate_LH	orange1	13	512.439783333333
Peru_LIP_Pacapaccari_600BP.Capt	2	694.1412	182.5525	329.0362	1059.2462	CentralAndes_LateIntermediate_LH	orange1	8	512.439783333333
Peru_Kanamarka1_LH.Capt	1	518.5731	168.0665	182.4401	854.7061	CentralAndes_LateHorizon_LH	darkorange2	5	518.5731
Peru_Laramate_900BP.Capt	3	500.8583	92.277	316.3043	685.4123	CentralAndes_MiddleHorizon_LH	orange2	8	539.457225
Bolivia_MH_Iroco_1050BP.Capt	1	578.05615	196.978	184.10015	972.01215	CentralAndes_MiddleHorizon_LH	orange2	1	539.457225
Peru_RioUncallane_1600BP.SG	4	629.2219	111.7795	405.6629	852.7809	CentralAndes_EarlyIntermediate_LH	darkorange1	3	629.2219
