# Supplementary material for: Local agricultural transition, crisis and migration in the Southern Andes
Source: Research Square preprint supplement (doi:10.21203/rs.3.rs-6450570/v1), 2025-05-05
Supplement: Supplementary file 5 [file 95f792b78393880addb57999.xlsx]

## Sheet: Hoja 1
Study	MajorGroup	Group	Color	Point	Individual	SexDetermination	Kinship	FstatsAncient_SG	FstatsAncient_SG.TVs	FstatsAncient_1240K	FstatsAncient_1240K.TVs	AdmixtureAncient	F4_Modern	AdmixtureWithModern	ConditionalHeterozygosity_SG	ConditionalHeterozygosity_1240K	Ne.hapROH	HapNe
PresentStudy	Uspallata	Barrancas B6 (LH-HG|LH-HG)	darkorange4	23	AR0147	TRUE	FALSE	FALSE	FALSE	FALSE	FALSE	FALSE	FALSE	FALSE	FALSE	FALSE	FALSE	FALSE
PresentStudy	Uspallata	Barrancas B6 (LH-HG|LH-HG)	darkorange4	23	AR0148	TRUE	FALSE	FALSE	FALSE	FALSE	FALSE	FALSE	FALSE	FALSE	FALSE	FALSE	FALSE	FALSE
PresentStudy	Uspallata	Barrancas B6 (LH-HG|LH-HG)	darkorange4	23	AR0149	TRUE	TRUE	TRUE	TRUE	TRUE	FALSE	TRUE	TRUE	TRUE	TRUE	TRUE	FALSE	FALSE
PresentStudy	Uspallata	Barrancas B6 (LH-HG|LH-HG)	darkorange4	23	AR0151	TRUE	TRUE	TRUE	TRUE	TRUE	TRUE	TRUE	TRUE	TRUE	TRUE	TRUE	FALSE	FALSE
PresentStudy	Uspallata	Barrancas B6 (LH-HG|LH-HG)	darkorange4	23	AR0152	TRUE	TRUE	TRUE	TRUE	TRUE	FALSE	TRUE	FALSE	FALSE	TRUE	TRUE	FALSE	FALSE
PresentStudy	Uspallata	Barrancas B6 (LH-HG|LH-HG)	darkorange4	23	AR0155	TRUE	FALSE	FALSE	FALSE	FALSE	FALSE	FALSE	FALSE	FALSE	FALSE	FALSE	FALSE	FALSE
PresentStudy	Uspallata	Barrio Ramos I (LH-LF|LH-F)	darkorange4	21	AR0161	TRUE	TRUE	FALSE	FALSE	FALSE	FALSE	FALSE	FALSE	FALSE	TRUE	TRUE	FALSE	FALSE
PresentStudy	Uspallata	Barrio Ramos I (LH-LF|LH-F)	darkorange4	21	AR0162	TRUE	TRUE	TRUE	TRUE	TRUE	TRUE	TRUE	TRUE	TRUE	TRUE	TRUE	TRUE	FALSE
PresentStudy	Uspallata	Tumulo II (LH-LF|LH-F)	darkorange4	22	AR0180	TRUE	TRUE	TRUE	TRUE	TRUE	FALSE	TRUE	FALSE	FALSE	TRUE	TRUE	FALSE	FALSE
PresentStudy	Uspallata	Tumulo II (LH-LF|LH-F)	darkorange4	22	AR0182	TRUE	FALSE	FALSE	FALSE	FALSE	FALSE	FALSE	FALSE	FALSE	FALSE	FALSE	FALSE	FALSE
PresentStudy	Uspallata	Tumulo II (LH-LF|LH-F)	darkorange4	22	AR0183	FALSE	FALSE	FALSE	FALSE	FALSE	FALSE	FALSE	FALSE	FALSE	FALSE	FALSE	FALSE	FALSE
PresentStudy	Uspallata	Potrero Las Colonias (LH-MF|LH-F)	goldenrod1	21	AR0185	TRUE	FALSE	FALSE	FALSE	FALSE	FALSE	FALSE	FALSE	FALSE	FALSE	FALSE	FALSE	FALSE
PresentStudy	Uspallata	Potrero Las Colonias (LH-MF|LH-F)	goldenrod1	21	AR0186	TRUE	FALSE	FALSE	FALSE	FALSE	FALSE	FALSE	FALSE	FALSE	FALSE	FALSE	FALSE	FALSE
PresentStudy	Uspallata	Potrero Las Colonias (LH-MF|LH-F)	goldenrod1	21	AR0187	TRUE	FALSE	FALSE	FALSE	FALSE	FALSE	FALSE	FALSE	FALSE	FALSE	FALSE	FALSE	FALSE
PresentStudy	Uspallata	Potrero Las Colonias (LH-MF|LH-F)	goldenrod1	21	AR0191	FALSE	FALSE	FALSE	FALSE	FALSE	FALSE	FALSE	FALSE	FALSE	FALSE	FALSE	FALSE	FALSE
PresentStudy	Uspallata	Potrero Las Colonias (LH-MF|LH-F)	goldenrod1	21	AR0192	TRUE	FALSE	FALSE	FALSE	FALSE	FALSE	FALSE	FALSE	FALSE	FALSE	FALSE	FALSE	FALSE
PresentStudy	Uspallata	Potrero Las Colonias (LH-MF|LH-F)	goldenrod1	21	AR0193	TRUE	FALSE	FALSE	FALSE	FALSE	FALSE	FALSE	FALSE	FALSE	FALSE	FALSE	FALSE	FALSE
PresentStudy	Uspallata	Potrero Las Colonias (LH-MF|LH-F)	goldenrod1	21	AR0194	TRUE	FALSE	FALSE	FALSE	FALSE	FALSE	FALSE	FALSE	FALSE	FALSE	FALSE	FALSE	FALSE
PresentStudy	Uspallata	Potrero Las Colonias (LH-MF|LH-F)	goldenrod1	21	AR0195	TRUE	TRUE	FALSE	FALSE	FALSE	FALSE	FALSE	FALSE	FALSE	TRUE	FALSE	FALSE	FALSE
PresentStudy	Uspallata	Potrero Las Colonias (LH-MF|LH-F)	goldenrod1	21	AR0500and513	TRUE	TRUE	TRUE	TRUE	TRUE	TRUE	TRUE	TRUE	TRUE	TRUE	TRUE	TRUE	TRUE
PresentStudy	Uspallata	Potrero Las Colonias (LH-MF|LH-F)	goldenrod1	21	AR0501	TRUE	TRUE	TRUE	TRUE	TRUE	TRUE	TRUE	TRUE	TRUE	TRUE	TRUE	FALSE	TRUE
PresentStudy	Uspallata	Potrero Las Colonias (LH-MF|LH-F)	goldenrod1	21	AR0502	TRUE	FALSE	FALSE	FALSE	FALSE	FALSE	FALSE	FALSE	FALSE	FALSE	FALSE	FALSE	FALSE
PresentStudy	Uspallata	Potrero Las Colonias (LH-MF|LH-F)	goldenrod1	21	AR0503	TRUE	TRUE	FALSE	FALSE	FALSE	FALSE	FALSE	FALSE	FALSE	TRUE	FALSE	FALSE	FALSE
PresentStudy	Uspallata	Potrero Las Colonias (LH-MF|LH-F)	goldenrod1	21	AR0504	TRUE	TRUE	TRUE	TRUE	TRUE	TRUE	TRUE	TRUE	TRUE	TRUE	TRUE	FALSE	TRUE
PresentStudy	Uspallata	Potrero Las Colonias (LH-MF|LH-F)	goldenrod1	21	AR0505	TRUE	TRUE	TRUE	TRUE	TRUE	TRUE	TRUE	TRUE	TRUE	TRUE	TRUE	TRUE	TRUE
PresentStudy	Uspallata	Potrero Las Colonias (LH-MF|LH-F)	goldenrod1	21	AR0506	TRUE	TRUE	TRUE	TRUE	TRUE	TRUE	TRUE	TRUE	TRUE	TRUE	TRUE	TRUE	TRUE
PresentStudy	Uspallata	Potrero Las Colonias (LH-MF|LH-F)	goldenrod1	21	AR0507	TRUE	TRUE	FALSE	FALSE	FALSE	FALSE	FALSE	FALSE	FALSE	TRUE	TRUE	FALSE	FALSE
PresentStudy	Uspallata	Potrero Las Colonias (LH-MF|LH-F)	goldenrod1	21	AR0508	TRUE	TRUE	TRUE	TRUE	TRUE	TRUE	TRUE	TRUE	TRUE	TRUE	TRUE	FALSE	TRUE
PresentStudy	Uspallata	Potrero Las Colonias (LH-MF|LH-F)	goldenrod1	21	AR0509	TRUE	TRUE	TRUE	TRUE	TRUE	TRUE	TRUE	TRUE	TRUE	TRUE	TRUE	TRUE	TRUE
PresentStudy	Uspallata	Potrero Las Colonias (LH-MF|LH-F)	goldenrod1	21	AR0510	TRUE	TRUE	TRUE	TRUE	TRUE	TRUE	TRUE	TRUE	TRUE	TRUE	TRUE	TRUE	TRUE
PresentStudy	Uspallata	Potrero Las Colonias (LH-MF|LH-F)	goldenrod1	21	AR0511	TRUE	TRUE	FALSE	FALSE	FALSE	FALSE	FALSE	FALSE	FALSE	TRUE	TRUE	FALSE	FALSE
PresentStudy	Uspallata	Potrero Las Colonias (LH-MF|LH-F)	goldenrod1	21	AR0512	TRUE	TRUE	TRUE	TRUE	TRUE	TRUE	TRUE	TRUE	TRUE	TRUE	TRUE	FALSE	TRUE
PresentStudy	Uspallata	Potrero Las Colonias (LH-MF|LH-F)	goldenrod1	21	AR0514	TRUE	TRUE	TRUE	TRUE	TRUE	TRUE	TRUE	TRUE	TRUE	TRUE	TRUE	TRUE	TRUE
PresentStudy	Uspallata	Potrero Las Colonias (LH-MF|LH-F)	goldenrod1	21	AR0515	TRUE	TRUE	FALSE	FALSE	FALSE	FALSE	FALSE	FALSE	FALSE	TRUE	TRUE	FALSE	FALSE
PresentStudy	Uspallata	Potrero Las Colonias (LH-MF|LH-F)	goldenrod1	21	AR0516	TRUE	TRUE	FALSE	FALSE	FALSE	FALSE	FALSE	FALSE	FALSE	TRUE	TRUE	FALSE	FALSE
PresentStudy	Uspallata	Potrero Las Colonias (LH-MFout|LH-F)	goldenrod1	23	AR0517	TRUE	TRUE	TRUE	TRUE	TRUE	TRUE	TRUE	TRUE	TRUE	TRUE	TRUE	FALSE	FALSE
PresentStudy	Uspallata	Potrero Las Colonias (LH-MF|LH-F)	goldenrod1	21	AR0518	TRUE	TRUE	TRUE	TRUE	TRUE	TRUE	TRUE	TRUE	TRUE	TRUE	TRUE	FALSE	TRUE
PresentStudy	Uspallata	Potrero Las Colonias (LH-MF|LH-F)	goldenrod1	21	AR0519	TRUE	TRUE	TRUE	TRUE	TRUE	TRUE	TRUE	TRUE	TRUE	TRUE	TRUE	FALSE	TRUE
PresentStudy	Uspallata	Potrero Las Colonias (LH-LFplc|LH-F)	darkorange	22	AR0520	TRUE	TRUE	TRUE	TRUE	TRUE	TRUE	TRUE	TRUE	TRUE	TRUE	TRUE	FALSE	FALSE
PresentStudy	Uspallata	Potrero Las Colonias (LH-MF|LH-F)	goldenrod1	21	AR0521	TRUE	TRUE	TRUE	TRUE	TRUE	TRUE	TRUE	TRUE	TRUE	TRUE	TRUE	FALSE	TRUE
PresentStudy	Uspallata	Potrero Las Colonias (LH-MF|LH-F)	goldenrod1	21	AR0522	TRUE	TRUE	FALSE	FALSE	FALSE	FALSE	FALSE	FALSE	FALSE	TRUE	TRUE	FALSE	FALSE
PresentStudy	Uspallata	Potrero Las Colonias (LH-MF|LH-F)	goldenrod1	21	AR0523	TRUE	TRUE	FALSE	FALSE	FALSE	FALSE	FALSE	FALSE	FALSE	TRUE	TRUE	FALSE	FALSE
PresentStudy	Uspallata	Potrero Las Colonias (LH-MF|LH-F)	goldenrod1	21	AR0524	TRUE	TRUE	FALSE	FALSE	FALSE	FALSE	FALSE	FALSE	FALSE	TRUE	FALSE	FALSE	FALSE
PresentStudy	Uspallata	Potrero Las Colonias (LH-MF|LH-F)	goldenrod1	21	AR0526	TRUE	TRUE	TRUE	TRUE	TRUE	TRUE	TRUE	TRUE	TRUE	TRUE	TRUE	TRUE	TRUE
PresentStudy	Uspallata	Potrero Las Colonias (LH-MF|LH-F)	goldenrod1	21	AR0527	TRUE	TRUE	TRUE	TRUE	TRUE	TRUE	TRUE	TRUE	TRUE	TRUE	TRUE	TRUE	TRUE
PresentStudy	Uspallata	Potrero Las Colonias (LH-MF|LH-F)	goldenrod1	21	AR0528	TRUE	TRUE	TRUE	TRUE	TRUE	TRUE	TRUE	TRUE	TRUE	TRUE	TRUE	TRUE	TRUE
Bongers_2020_PNAS	CentralAndes_MiddleHorizon_LH	Peru_Chincha_LH.SG	orange2	6	UC12_25	FALSE	FALSE	TRUE	TRUE	TRUE	TRUE	TRUE	TRUE	TRUE	TRUE	TRUE	FALSE	FALSE
Bongers_2020_PNAS	CentralAndes_MiddleHorizon_LH	Peru_Chincha_LH.SG	orange2	6	UC8_8173	FALSE	FALSE	TRUE	TRUE	TRUE	TRUE	TRUE	TRUE	TRUE	TRUE	TRUE	FALSE	FALSE
Bongers_2020_PNAS	CentralAndes_MiddleHorizon_LH	Peru_Chincha_LH.SG	orange2	6	UC12_24	FALSE	FALSE	TRUE	TRUE	TRUE	TRUE	TRUE	TRUE	TRUE	TRUE	TRUE	FALSE	FALSE
Bongers_2020_PNAS	CentralAndes_MiddleHorizon_LH	Peru_Chincha_LH.SG	orange2	6	UC12_12	FALSE	FALSE	TRUE	TRUE	TRUE	TRUE	TRUE	TRUE	TRUE	TRUE	TRUE	FALSE	FALSE
Bongers_2020_PNAS	CentralAndes_MiddleHorizon_LH	Peru_Chincha_LH.SG	orange2	6	UC8_8168	FALSE	FALSE	TRUE	TRUE	TRUE	TRUE	TRUE	TRUE	TRUE	TRUE	TRUE	FALSE	FALSE
Bongers_2020_PNAS	CentralAndes_MiddleHorizon_LH	Peru_Chincha_LH.SG	orange2	6	UC12_20	FALSE	FALSE	TRUE	TRUE	TRUE	TRUE	TRUE	TRUE	TRUE	TRUE	TRUE	FALSE	FALSE
CampeloDosSantos_2022_ProcB	Brazil_LH	Brazil_PedraDoTubarao_900BP.SG	palegreen1	9	Brazil-2	FALSE	FALSE	TRUE	TRUE	TRUE	TRUE	TRUE	TRUE	TRUE	FALSE	FALSE	FALSE	FALSE
Capodiferro_2021_Cell	CentralAmerica_LH	Panama_IsthmoColombian_PreColonial.SG	darkviolet	1	PAPV_175	FALSE	FALSE	TRUE	TRUE	TRUE	FALSE	TRUE	FALSE	FALSE	TRUE	TRUE	FALSE	FALSE
Capodiferro_2021_Cell	CentralAmerica_LH	Panama_IsthmoColombian_PreColonial.SG	darkviolet	1	PAPV_174	FALSE	FALSE	TRUE	TRUE	TRUE	FALSE	TRUE	FALSE	FALSE	TRUE	TRUE	FALSE	FALSE
Capodiferro_2021_Cell	CentralAmerica_LH	Panama_IsthmoColombian_PreColonial.SG	darkviolet	1	PAPV_114	FALSE	FALSE	TRUE	TRUE	TRUE	FALSE	TRUE	FALSE	FALSE	TRUE	TRUE	FALSE	FALSE
Capodiferro_2021_Cell	CentralAmerica_LH	Panama_IsthmoColombian_PreColonial.SG	darkviolet	1	PAPV_173	FALSE	FALSE	TRUE	TRUE	TRUE	TRUE	TRUE	FALSE	TRUE	TRUE	TRUE	FALSE	FALSE
Capodiferro_2021_Cell	CentralAmerica_LH	Panama_IsthmoColombian_PreColonial.SG	darkviolet	1	PAPV_146	FALSE	FALSE	TRUE	TRUE	TRUE	TRUE	TRUE	FALSE	TRUE	TRUE	TRUE	FALSE	FALSE
Capodiferro_2021_Cell	CentralAmerica_LH	Panama_IsthmoColombian_PreColonial.SG	darkviolet	1	PAPV_172	FALSE	FALSE	TRUE	TRUE	TRUE	FALSE	TRUE	FALSE	FALSE	TRUE	TRUE	FALSE	FALSE
Capodiferro_2021_Cell	CentralAmerica_LH	Panama_IsthmoColombian_PreColonial.SG	darkviolet	1	PAPV_117	FALSE	FALSE	TRUE	TRUE	TRUE	FALSE	TRUE	FALSE	TRUE	TRUE	TRUE	FALSE	FALSE
Capodiferro_2021_Cell	CentralAmerica_LH	Panama_IsthmoColombian_PreColonial.SG	darkviolet	1	PAPV_118	FALSE	FALSE	TRUE	TRUE	TRUE	FALSE	TRUE	FALSE	FALSE	TRUE	TRUE	FALSE	FALSE
Capodiferro_2021_Cell	CentralAmerica_LH	Panama_IsthmoColombian_PreColonial.SG	darkviolet	1	PAPV_167	FALSE	FALSE	TRUE	TRUE	TRUE	FALSE	TRUE	FALSE	FALSE	TRUE	TRUE	FALSE	FALSE
delaFuente_2018_PNAS	CentralChile_Modern	Huilliche-delaFuente	brown3	2	SJ-70	FALSE	FALSE	FALSE	FALSE	FALSE	FALSE	FALSE	TRUE	TRUE	FALSE	FALSE	FALSE	FALSE
delaFuente_2018_PNAS	CentralChile_Modern	Huilliche-delaFuente	brown3	2	SJ-28	FALSE	FALSE	FALSE	FALSE	FALSE	FALSE	FALSE	TRUE	TRUE	FALSE	FALSE	FALSE	FALSE
delaFuente_2018_PNAS	CentralChile_Modern	Huilliche-delaFuente	brown3	2	SJ-55	FALSE	FALSE	FALSE	FALSE	FALSE	FALSE	FALSE	TRUE	TRUE	FALSE	FALSE	FALSE	FALSE
delaFuente_2018_PNAS	CentralChile_Modern	Huilliche-delaFuente	brown3	2	SJ-3	FALSE	FALSE	FALSE	FALSE	FALSE	FALSE	FALSE	TRUE	TRUE	FALSE	FALSE	FALSE	FALSE
delaFuente_2018_PNAS	CentralChile_Modern	Huilliche-delaFuente	brown3	2	SJ-36	FALSE	FALSE	FALSE	FALSE	FALSE	FALSE	FALSE	TRUE	TRUE	FALSE	FALSE	FALSE	FALSE
delaFuente_2018_PNAS	CentralChile_Modern	Huilliche-delaFuente	brown3	2	SJ-13	FALSE	FALSE	FALSE	FALSE	FALSE	FALSE	FALSE	TRUE	TRUE	FALSE	FALSE	FALSE	FALSE
delaFuente_2018_PNAS	CentralChile_Modern	Huilliche-delaFuente	brown3	2	SJ-67	FALSE	FALSE	FALSE	FALSE	FALSE	FALSE	FALSE	TRUE	TRUE	FALSE	FALSE	FALSE	FALSE
delaFuente_2018_PNAS	CentralChile_Modern	Huilliche-delaFuente	brown3	2	SJ-16	FALSE	FALSE	FALSE	FALSE	FALSE	FALSE	FALSE	TRUE	TRUE	FALSE	FALSE	FALSE	FALSE
delaFuente_2018_PNAS	CentralChile_Modern	Huilliche-delaFuente	brown3	2	SJ-27	FALSE	FALSE	FALSE	FALSE	FALSE	FALSE	FALSE	TRUE	TRUE	FALSE	FALSE	FALSE	FALSE
delaFuente_2018_PNAS	CentralChile_Modern	Huilliche-delaFuente	brown3	2	SJ-71	FALSE	FALSE	FALSE	FALSE	FALSE	FALSE	FALSE	TRUE	TRUE	FALSE	FALSE	FALSE	FALSE
delaFuente_2018_PNAS	CentralChile_Modern	Huilliche-delaFuente	brown3	2	SJ-99	FALSE	FALSE	FALSE	FALSE	FALSE	FALSE	FALSE	TRUE	TRUE	FALSE	FALSE	FALSE	FALSE
delaFuente_2018_PNAS	CentralChile_Modern	Huilliche-delaFuente	brown3	2	SJ-62	FALSE	FALSE	FALSE	FALSE	FALSE	FALSE	FALSE	TRUE	TRUE	FALSE	FALSE	FALSE	FALSE
delaFuente_2018_PNAS	CentralChile_Modern	Huilliche-delaFuente	brown3	2	SJ-96	FALSE	FALSE	FALSE	FALSE	FALSE	FALSE	FALSE	TRUE	TRUE	FALSE	FALSE	FALSE	FALSE
delaFuente_2018_PNAS	CentralChile_Modern	Huilliche-delaFuente	brown3	2	SJ-30	FALSE	FALSE	FALSE	FALSE	FALSE	FALSE	FALSE	TRUE	TRUE	FALSE	FALSE	FALSE	FALSE
delaFuente_2018_PNAS	CentralChile_Modern	Huilliche-delaFuente	brown3	2	SJ-66	FALSE	FALSE	FALSE	FALSE	FALSE	FALSE	FALSE	TRUE	TRUE	FALSE	FALSE	FALSE	FALSE
delaFuente_2018_PNAS	CentralChile_Modern	Huilliche-delaFuente	brown3	2	SJ-87	FALSE	FALSE	FALSE	FALSE	FALSE	FALSE	FALSE	TRUE	TRUE	FALSE	FALSE	FALSE	FALSE
delaFuente_2018_PNAS	CentralChile_Modern	Huilliche-delaFuente	brown3	2	SJ-61	FALSE	FALSE	FALSE	FALSE	FALSE	FALSE	FALSE	TRUE	TRUE	FALSE	FALSE	FALSE	FALSE
delaFuente_2018_PNAS	CentralChile_Modern	Huilliche-delaFuente	brown3	2	SJ-54	FALSE	FALSE	FALSE	FALSE	FALSE	FALSE	FALSE	TRUE	TRUE	FALSE	FALSE	FALSE	FALSE
delaFuente_2018_PNAS	CentralChile_Modern	Huilliche-delaFuente	brown3	2	SJ-65	FALSE	FALSE	FALSE	FALSE	FALSE	FALSE	FALSE	TRUE	TRUE	FALSE	FALSE	FALSE	FALSE
delaFuente_2018_PNAS	CentralChile_Modern	Huilliche-delaFuente	brown3	2	SJ-72	FALSE	FALSE	FALSE	FALSE	FALSE	FALSE	FALSE	TRUE	TRUE	FALSE	FALSE	FALSE	FALSE
delaFuente_2018_PNAS	CentralChile_Modern	Pehuenche-delaFuente	brown3	3	TRA-106	FALSE	FALSE	FALSE	FALSE	FALSE	FALSE	FALSE	TRUE	TRUE	FALSE	FALSE	FALSE	FALSE
delaFuente_2018_PNAS	CentralChile_Modern	Pehuenche-delaFuente	brown3	3	TRA-099	FALSE	FALSE	FALSE	FALSE	FALSE	FALSE	FALSE	TRUE	TRUE	FALSE	FALSE	FALSE	FALSE
delaFuente_2018_PNAS	CentralChile_Modern	Pehuenche-delaFuente	brown3	3	TRA-063	FALSE	FALSE	FALSE	FALSE	FALSE	FALSE	FALSE	TRUE	TRUE	FALSE	FALSE	FALSE	FALSE
delaFuente_2018_PNAS	CentralChile_Modern	Pehuenche-delaFuente	brown3	3	TRA-030	FALSE	FALSE	FALSE	FALSE	FALSE	FALSE	FALSE	TRUE	TRUE	FALSE	FALSE	FALSE	FALSE
delaFuente_2018_PNAS	CentralChile_Modern	Pehuenche-delaFuente	brown3	3	TRA-131	FALSE	FALSE	FALSE	FALSE	FALSE	FALSE	FALSE	TRUE	TRUE	FALSE	FALSE	FALSE	FALSE
delaFuente_2018_PNAS	CentralChile_Modern	Pehuenche-delaFuente	brown3	3	TRA-045	FALSE	FALSE	FALSE	FALSE	FALSE	FALSE	FALSE	TRUE	TRUE	FALSE	FALSE	FALSE	FALSE
delaFuente_2018_PNAS	CentralChile_Modern	Pehuenche-delaFuente	brown3	3	TRA-007	FALSE	FALSE	FALSE	FALSE	FALSE	FALSE	FALSE	TRUE	TRUE	FALSE	FALSE	FALSE	FALSE
delaFuente_2018_PNAS	CentralChile_Modern	Pehuenche-delaFuente	brown3	3	TRA-112	FALSE	FALSE	FALSE	FALSE	FALSE	FALSE	FALSE	TRUE	TRUE	FALSE	FALSE	FALSE	FALSE
delaFuente_2018_PNAS	CentralChile_Modern	Pehuenche-delaFuente	brown3	3	TRA-084	FALSE	FALSE	FALSE	FALSE	FALSE	FALSE	FALSE	TRUE	TRUE	FALSE	FALSE	FALSE	FALSE
delaFuente_2018_PNAS	CentralChile_Modern	Pehuenche-delaFuente	brown3	3	TRA-082	FALSE	FALSE	FALSE	FALSE	FALSE	FALSE	FALSE	TRUE	TRUE	FALSE	FALSE	FALSE	FALSE
delaFuente_2018_PNAS	CentralChile_Modern	Pehuenche-delaFuente	brown3	3	TRA-066	FALSE	FALSE	FALSE	FALSE	FALSE	FALSE	FALSE	TRUE	TRUE	FALSE	FALSE	FALSE	FALSE
delaFuente_2018_PNAS	CentralChile_Modern	Pehuenche-delaFuente	brown3	3	TRA-093	FALSE	FALSE	FALSE	FALSE	FALSE	FALSE	FALSE	TRUE	TRUE	FALSE	FALSE	FALSE	FALSE
delaFuente_2018_PNAS	CentralChile_Modern	Pehuenche-delaFuente	brown3	3	TRA-090	FALSE	FALSE	FALSE	FALSE	FALSE	FALSE	FALSE	TRUE	TRUE	FALSE	FALSE	FALSE	FALSE
delaFuente_2018_PNAS	CentralChile_Modern	Pehuenche-delaFuente	brown3	3	TRA-033	FALSE	FALSE	FALSE	FALSE	FALSE	FALSE	FALSE	TRUE	TRUE	FALSE	FALSE	FALSE	FALSE
delaFuente_2018_PNAS	CentralChile_Modern	Pehuenche-delaFuente	brown3	3	TRA-138	FALSE	FALSE	FALSE	FALSE	FALSE	FALSE	FALSE	TRUE	TRUE	FALSE	FALSE	FALSE	FALSE
delaFuente_2018_PNAS	SouthPatagonia_LH	Chile_WesternArchipelago_Kaweskar_1200BP.SG	blue1	9	IPK13	FALSE	FALSE	TRUE	TRUE	TRUE	TRUE	TRUE	TRUE	TRUE	FALSE	FALSE	TRUE	FALSE
delaFuente_2018_PNAS	SouthPatagonia_LH	Chile_WesternArchipelago_Kaweskar_800BP.SG	blue1	10	IPK12	FALSE	FALSE	TRUE	TRUE	TRUE	TRUE	TRUE	TRUE	TRUE	FALSE	FALSE	TRUE	FALSE
delaFuente_2018_PNAS	SouthPatagonia_LH	Chile_Yamana_BeagleChannel_800BP.SG	blue1	11	IPY08	FALSE	FALSE	TRUE	TRUE	TRUE	TRUE	TRUE	TRUE	TRUE	TRUE	TRUE	TRUE	FALSE
delaFuente_2018_PNAS	SouthPatagonia_LH	Chile_Yamana_BeagleChannel_800BP.SG	blue1	11	IPY10	FALSE	FALSE	TRUE	TRUE	TRUE	TRUE	TRUE	TRUE	TRUE	TRUE	TRUE	TRUE	FALSE
delaFuente_2018_PNAS	SouthPatagonia_Modern	Kaweskar-delaFuente	brown3	6	K-11b	FALSE	FALSE	FALSE	FALSE	FALSE	FALSE	FALSE	TRUE	TRUE	FALSE	FALSE	FALSE	FALSE
delaFuente_2018_PNAS	SouthPatagonia_Modern	Kaweskar-delaFuente	brown3	6	K-03b	FALSE	FALSE	FALSE	FALSE	FALSE	FALSE	FALSE	TRUE	TRUE	FALSE	FALSE	FALSE	FALSE
delaFuente_2018_PNAS	SouthPatagonia_Modern	Kaweskar-delaFuente	brown3	6	K-10b	FALSE	FALSE	FALSE	FALSE	FALSE	FALSE	FALSE	TRUE	TRUE	FALSE	FALSE	FALSE	FALSE
delaFuente_2018_PNAS	SouthPatagonia_Modern	Yamana-Reich-delaFuente	brown3	8	YAM-016	FALSE	FALSE	FALSE	FALSE	FALSE	FALSE	FALSE	TRUE	TRUE	FALSE	FALSE	FALSE	FALSE
delaFuente_2018_PNAS	SouthPatagonia_Modern	Yamana-Reich-delaFuente	brown3	8	YAM-024	FALSE	FALSE	FALSE	FALSE	FALSE	FALSE	FALSE	TRUE	TRUE	FALSE	FALSE	FALSE	FALSE
delaFuente_2018_PNAS	SouthPatagonia_Modern	Yamana-Reich-delaFuente	brown3	8	YAM-015	FALSE	FALSE	FALSE	FALSE	FALSE	FALSE	FALSE	TRUE	TRUE	FALSE	FALSE	FALSE	FALSE
delaFuente_2018_PNAS	SouthPatagonia_Modern	Yamana-Reich-delaFuente	brown3	8	YAM-021	FALSE	FALSE	FALSE	FALSE	FALSE	FALSE	FALSE	TRUE	TRUE	FALSE	FALSE	FALSE	FALSE
delaFuente_2018_PNAS	SouthPatagonia_Modern	Yamana-Reich-delaFuente	brown3	8	YAM-022	FALSE	FALSE	FALSE	FALSE	FALSE	FALSE	FALSE	TRUE	TRUE	FALSE	FALSE	FALSE	FALSE
delaFuente_2018_PNAS	SouthPatagonia_Modern	Yamana-Reich-delaFuente	brown3	8	YAM-025	FALSE	FALSE	FALSE	FALSE	FALSE	FALSE	FALSE	TRUE	TRUE	FALSE	FALSE	FALSE	FALSE
delaFuente_2018_PNAS	SouthPatagonia_Modern	Yamana-Reich-delaFuente	brown3	8	YAM-002	FALSE	FALSE	FALSE	FALSE	FALSE	FALSE	FALSE	TRUE	TRUE	FALSE	FALSE	FALSE	FALSE
delaFuente_2018_PNAS	SouthPatagonia_Modern	Yamana-Reich-delaFuente	brown3	8	YAM-006	FALSE	FALSE	FALSE	FALSE	FALSE	FALSE	FALSE	TRUE	TRUE	FALSE	FALSE	FALSE	FALSE
delaFuente_2018_PNAS	SouthPatagonia_Modern	Yamana-Reich-delaFuente	brown3	8	YAM-023	FALSE	FALSE	FALSE	FALSE	FALSE	FALSE	FALSE	TRUE	TRUE	FALSE	FALSE	FALSE	FALSE
delaFuente_2018_PNAS	SouthPatagonia_Modern	Yamana-Reich-delaFuente	brown3	8	YAM-013	FALSE	FALSE	FALSE	FALSE	FALSE	FALSE	FALSE	TRUE	TRUE	FALSE	FALSE	FALSE	FALSE
delaFuente_2018_PNAS	SouthPatagonia_Modern	Yamana-Reich-delaFuente	brown3	8	YAM-014	FALSE	FALSE	FALSE	FALSE	FALSE	FALSE	FALSE	TRUE	TRUE	FALSE	FALSE	FALSE	FALSE
delaFuente_2018_PNAS	SouthPatagonia_Modern	Yamana-Reich-delaFuente	brown3	8	YAM-026	FALSE	FALSE	FALSE	FALSE	FALSE	FALSE	FALSE	TRUE	TRUE	FALSE	FALSE	FALSE	FALSE
delaFuente_2018_PNAS	SouthPatagonia_Modern	Yamana-Reich-delaFuente	brown3	8	YAM-019	FALSE	FALSE	FALSE	FALSE	FALSE	FALSE	FALSE	TRUE	TRUE	FALSE	FALSE	FALSE	FALSE
delaFuente_2018_PNAS	SouthPatagonia_Modern	Yamana-Reich-delaFuente	brown3	8	YAM-020	FALSE	FALSE	FALSE	FALSE	FALSE	FALSE	FALSE	TRUE	TRUE	FALSE	FALSE	FALSE	FALSE
delaFuente_2018_PNAS	SouthPatagonia_Modern	Yamana-Reich-delaFuente	brown3	8	YAM-011	FALSE	FALSE	FALSE	FALSE	FALSE	FALSE	FALSE	TRUE	TRUE	FALSE	FALSE	FALSE	FALSE
delaFuente_2024_GBE	QhapaqHucha_Inka_LH	Argentina_Toro_475BP.SG	Brown3	11	Toro	FALSE	FALSE	TRUE	TRUE	TRUE	TRUE	TRUE	TRUE	TRUE	FALSE	FALSE	FALSE	FALSE
delaFuente_2024_GBE	QhapaqHucha_Inka_LH	Chile_Plomo_490BP.SG	brown3	10	Plomo	FALSE	FALSE	TRUE	TRUE	TRUE	TRUE	TRUE	TRUE	TRUE	FALSE	FALSE	FALSE	FALSE
Ferraz_2023_NatEcoEvo	Brazil_EH	Brazil_Capelinha_10400BP.Capt	palegreen1	23	CAP007	FALSE	FALSE	FALSE	FALSE	TRUE	TRUE	TRUE	TRUE	TRUE	FALSE	FALSE	FALSE	FALSE
Ferraz_2023_NatEcoEvo	Brazil_EH	Brazil_LocaDoSuin_9100BP.Capt	palegreen1	24	PAI001	FALSE	FALSE	FALSE	FALSE	TRUE	TRUE	TRUE	TRUE	TRUE	FALSE	FALSE	FALSE	FALSE
Ferraz_2023_NatEcoEvo	Brazil_LH	Brazil_Cabecuda_3200BP.Capt	palegreen1	10	CBE003	FALSE	FALSE	FALSE	FALSE	TRUE	TRUE	TRUE	TRUE	TRUE	FALSE	TRUE	TRUE	FALSE
Ferraz_2023_NatEcoEvo	Brazil_LH	Brazil_Cabecuda_3200BP.Capt	palegreen1	10	CBE004	FALSE	FALSE	FALSE	FALSE	TRUE	TRUE	TRUE	TRUE	TRUE	FALSE	TRUE	FALSE	FALSE
Ferraz_2023_NatEcoEvo	Brazil_LH	Brazil_CubataoI_2700BP.Capt	palegreen1	11	CUB002	FALSE	FALSE	FALSE	FALSE	TRUE	FALSE	TRUE	FALSE	FALSE	FALSE	FALSE	FALSE	FALSE
Ferraz_2023_NatEcoEvo	Brazil_LH	Brazil_GalhetaIV_1200BP.Capt	palegreen1	12	GA4002	FALSE	FALSE	FALSE	FALSE	TRUE	FALSE	TRUE	TRUE	TRUE	FALSE	FALSE	FALSE	FALSE
Ferraz_2023_NatEcoEvo	Brazil_LH	Brazil_JabuticabeiraII_2400BP.Capt	palegreen1	13	JBT025	FALSE	FALSE	FALSE	FALSE	TRUE	TRUE	TRUE	TRUE	TRUE	FALSE	TRUE	TRUE	FALSE
Ferraz_2023_NatEcoEvo	Brazil_LH	Brazil_JabuticabeiraII_2400BP.Capt	palegreen1	13	JBT020	FALSE	FALSE	FALSE	FALSE	TRUE	FALSE	TRUE	TRUE	TRUE	FALSE	TRUE	FALSE	FALSE
Ferraz_2023_NatEcoEvo	Brazil_LH	Brazil_JabuticabeiraII_2400BP.Capt	palegreen1	13	JBT021	FALSE	FALSE	FALSE	FALSE	TRUE	TRUE	TRUE	TRUE	TRUE	FALSE	TRUE	TRUE	FALSE
Ferraz_2023_NatEcoEvo	Brazil_LH	Brazil_JabuticabeiraII_2400BP.Capt	palegreen1	13	JBT022	FALSE	FALSE	FALSE	FALSE	TRUE	TRUE	TRUE	TRUE	TRUE	FALSE	TRUE	TRUE	FALSE
Ferraz_2023_NatEcoEvo	Brazil_LH	Brazil_JabuticabeiraII_2400BP.Capt	palegreen1	13	JBT018	FALSE	FALSE	FALSE	FALSE	TRUE	TRUE	TRUE	TRUE	TRUE	FALSE	TRUE	TRUE	FALSE
Ferraz_2023_NatEcoEvo	Brazil_LH	Brazil_JabuticabeiraII_2400BP.Capt	palegreen1	13	JBT010	FALSE	FALSE	FALSE	FALSE	TRUE	TRUE	TRUE	TRUE	TRUE	FALSE	TRUE	TRUE	FALSE
Ferraz_2023_NatEcoEvo	Brazil_LH	Brazil_JabuticabeiraII_2400BP.Capt	palegreen1	13	JBT023	FALSE	FALSE	FALSE	FALSE	TRUE	TRUE	TRUE	TRUE	TRUE	FALSE	TRUE	TRUE	FALSE
Ferraz_2023_NatEcoEvo	Brazil_LH	Brazil_JabuticabeiraII_2400BP.Capt	palegreen1	13	JBT013	FALSE	FALSE	FALSE	FALSE	TRUE	TRUE	TRUE	TRUE	TRUE	FALSE	TRUE	TRUE	FALSE
Ferraz_2023_NatEcoEvo	Brazil_LH	Brazil_JabuticabeiraII_2400BP.Capt	palegreen1	13	JBT009	FALSE	FALSE	FALSE	FALSE	TRUE	TRUE	TRUE	TRUE	TRUE	FALSE	TRUE	TRUE	FALSE
Ferraz_2023_NatEcoEvo	Brazil_LH	Brazil_JabuticabeiraII_2400BP.Capt	palegreen1	13	JBT026	FALSE	FALSE	FALSE	FALSE	TRUE	TRUE	TRUE	TRUE	TRUE	FALSE	TRUE	TRUE	FALSE
Ferraz_2023_NatEcoEvo	Brazil_LH	Brazil_JabuticabeiraII_2400BP.Capt	palegreen1	13	JBT012	FALSE	FALSE	FALSE	FALSE	TRUE	TRUE	TRUE	TRUE	TRUE	FALSE	TRUE	TRUE	FALSE
Ferraz_2023_NatEcoEvo	Brazil_LH	Brazil_JabuticabeiraII_2400BP.Capt	palegreen1	13	JBT001	FALSE	FALSE	FALSE	FALSE	TRUE	FALSE	TRUE	TRUE	TRUE	FALSE	TRUE	FALSE	FALSE
Ferraz_2023_NatEcoEvo	Brazil_LH	Brazil_KaingangBurial_100BP.Capt	palegreen1	14	SAM014	FALSE	FALSE	FALSE	FALSE	TRUE	FALSE	TRUE	TRUE	TRUE	FALSE	FALSE	FALSE	FALSE
Ferraz_2023_NatEcoEvo	Brazil_LH	Brazil_Limao_1900BP.Capt	palegreen2	1	EPS003	FALSE	FALSE	FALSE	FALSE	TRUE	TRUE	TRUE	TRUE	TRUE	FALSE	TRUE	FALSE	FALSE
Ferraz_2023_NatEcoEvo	Brazil_LH	Brazil_Limao_1900BP.Capt	palegreen2	1	EPS005	FALSE	FALSE	FALSE	FALSE	TRUE	FALSE	TRUE	TRUE	TRUE	FALSE	TRUE	FALSE	FALSE
Ferraz_2023_NatEcoEvo	Brazil_LH	Brazil_Limao_1900BP.Capt	palegreen2	1	EPS011	FALSE	FALSE	FALSE	FALSE	TRUE	FALSE	TRUE	TRUE	TRUE	FALSE	TRUE	FALSE	FALSE
Ferraz_2023_NatEcoEvo	Brazil_LH	Brazil_Limao_1900BP.Capt	palegreen2	1	EPS004	FALSE	FALSE	FALSE	FALSE	TRUE	TRUE	TRUE	TRUE	TRUE	FALSE	TRUE	FALSE	FALSE
Ferraz_2023_NatEcoEvo	Brazil_LH	Brazil_Limao_2700BP.Capt	palegreen2	2	EPS002	FALSE	FALSE	FALSE	FALSE	TRUE	TRUE	TRUE	TRUE	TRUE	FALSE	FALSE	FALSE	FALSE
Ferraz_2023_NatEcoEvo	Brazil_LH	Brazil_Limao_500BP.Capt	palegreen1	1	EPS001	FALSE	FALSE	FALSE	FALSE	TRUE	TRUE	TRUE	TRUE	TRUE	FALSE	FALSE	FALSE	FALSE
Ferraz_2023_NatEcoEvo	Brazil_LH	Brazil_PalmeirasXingu_500BP.Capt	palegreen1	2	PLM001	FALSE	FALSE	FALSE	FALSE	TRUE	FALSE	TRUE	TRUE	TRUE	FALSE	FALSE	FALSE	FALSE
Ferraz_2023_NatEcoEvo	Brazil_LH	Brazil_PedraDoAlexandre2_undated.Capt	palegreen1	3	TDA002	FALSE	FALSE	FALSE	FALSE	TRUE	FALSE	TRUE	TRUE	TRUE	FALSE	FALSE	FALSE	FALSE
Ferraz_2023_NatEcoEvo	Brazil_LH	Brazil_VauUna_600BP.Capt	palegreen1	4	VSM001	FALSE	FALSE	FALSE	FALSE	TRUE	TRUE	TRUE	TRUE	TRUE	FALSE	FALSE	FALSE	FALSE
Ferraz_2023_NatEcoEvo|PosthNakatsuka_2018_Cell	Brazil_LH	Brazil_Jabuticabeira2_Burial102_1300BP.Capt	palegreen1	7	JBT019	FALSE	FALSE	FALSE	FALSE	TRUE	TRUE	TRUE	TRUE	TRUE	FALSE	FALSE	FALSE	FALSE
Ferraz_2023_NatEcoEvo|PosthNakatsuka_2018_Cell	Brazil_LH	Brazil_Jabuticabeira2_Burial111-112_2200BP.Capt	palegreen1	8	JBT015	FALSE	FALSE	FALSE	FALSE	TRUE	TRUE	TRUE	TRUE	TRUE	FALSE	FALSE	FALSE	FALSE
Harris_2018_PNAS	Amazonia_UnmaskedModern	Iquitos	palegreen3	6	EGAR00002605828	FALSE	FALSE	FALSE	FALSE	FALSE	FALSE	FALSE	FALSE	TRUE	FALSE	FALSE	FALSE	FALSE
Harris_2018_PNAS	Amazonia_UnmaskedModern	Iquitos	palegreen3	6	EGAR00002605830	FALSE	FALSE	FALSE	FALSE	FALSE	FALSE	FALSE	FALSE	TRUE	FALSE	FALSE	FALSE	FALSE
Harris_2018_PNAS	Amazonia_UnmaskedModern	Iquitos	palegreen3	6	EGAR00002605743	FALSE	FALSE	FALSE	FALSE	FALSE	FALSE	FALSE	FALSE	TRUE	FALSE	FALSE	FALSE	FALSE
Harris_2018_PNAS	Amazonia_UnmaskedModern	Iquitos	palegreen3	6	EGAR00002605822	FALSE	FALSE	FALSE	FALSE	FALSE	FALSE	FALSE	FALSE	TRUE	FALSE	FALSE	FALSE	FALSE
Harris_2018_PNAS	Amazonia_UnmaskedModern	Iquitos	palegreen3	6	EGAR00002605824	FALSE	FALSE	FALSE	FALSE	FALSE	FALSE	FALSE	FALSE	TRUE	FALSE	FALSE	FALSE	FALSE
Harris_2018_PNAS	Amazonia_UnmaskedModern	Iquitos	palegreen3	6	EGAR00002605742	FALSE	FALSE	FALSE	FALSE	FALSE	FALSE	FALSE	FALSE	TRUE	FALSE	FALSE	FALSE	FALSE
Harris_2018_PNAS	Amazonia_UnmaskedModern	Iquitos	palegreen3	6	EGAR00002605826	FALSE	FALSE	FALSE	FALSE	FALSE	FALSE	FALSE	FALSE	TRUE	FALSE	FALSE	FALSE	FALSE
Harris_2018_PNAS	Amazonia_UnmaskedModern	Iquitos	palegreen3	6	EGAR00002605827	FALSE	FALSE	FALSE	FALSE	FALSE	FALSE	FALSE	FALSE	TRUE	FALSE	FALSE	FALSE	FALSE
Harris_2018_PNAS	Amazonia_UnmaskedModern	Iquitos	palegreen3	6	EGAR00002605831	FALSE	FALSE	FALSE	FALSE	FALSE	FALSE	FALSE	FALSE	TRUE	FALSE	FALSE	FALSE	FALSE
Harris_2018_PNAS	Amazonia_UnmaskedModern	Iquitos	palegreen3	6	EGAR00002605823	FALSE	FALSE	FALSE	FALSE	FALSE	FALSE	FALSE	FALSE	TRUE	FALSE	FALSE	FALSE	FALSE
Harris_2018_PNAS	Amazonia_UnmaskedModern	Iquitos	palegreen3	6	EGAR00002605829	FALSE	FALSE	FALSE	FALSE	FALSE	FALSE	FALSE	FALSE	TRUE	FALSE	FALSE	FALSE	FALSE
Harris_2018_PNAS	Amazonia_UnmaskedModern	Iquitos	palegreen3	6	EGAR00002605741	FALSE	FALSE	FALSE	FALSE	FALSE	FALSE	FALSE	FALSE	TRUE	FALSE	FALSE	FALSE	FALSE
Harris_2018_PNAS	Amazonia_UnmaskedModern	Iquitos	palegreen3	6	EGAR00002605744	FALSE	FALSE	FALSE	FALSE	FALSE	FALSE	FALSE	FALSE	TRUE	FALSE	FALSE	FALSE	FALSE
Harris_2018_PNAS	Amazonia_UnmaskedModern	Iquitos	palegreen3	6	EGAR00002605745	FALSE	FALSE	FALSE	FALSE	FALSE	FALSE	FALSE	FALSE	TRUE	FALSE	FALSE	FALSE	FALSE
Harris_2018_PNAS	Amazonia_UnmaskedModern	Iquitos	palegreen3	6	EGAR00002605821	FALSE	FALSE	FALSE	FALSE	FALSE	FALSE	FALSE	FALSE	TRUE	FALSE	FALSE	FALSE	FALSE
Harris_2018_PNAS	Amazonia_UnmaskedModern	Iquitos	palegreen3	6	EGAR00002605825	FALSE	FALSE	FALSE	FALSE	FALSE	FALSE	FALSE	FALSE	TRUE	FALSE	FALSE	FALSE	FALSE
Harris_2018_PNAS	Amazonia_UnmaskedModern	Matzes	palegreen3	7	EGAR00002605840	FALSE	FALSE	FALSE	FALSE	FALSE	FALSE	FALSE	FALSE	TRUE	FALSE	FALSE	FALSE	FALSE
Harris_2018_PNAS	Amazonia_UnmaskedModern	Matzes	palegreen3	7	EGAR00002605839	FALSE	FALSE	FALSE	FALSE	FALSE	FALSE	FALSE	FALSE	TRUE	FALSE	FALSE	FALSE	FALSE
Harris_2018_PNAS	Amazonia_UnmaskedModern	Matzes	palegreen3	7	EGAR00002605842	FALSE	FALSE	FALSE	FALSE	FALSE	FALSE	FALSE	FALSE	TRUE	FALSE	FALSE	FALSE	FALSE
Harris_2018_PNAS	Amazonia_UnmaskedModern	Matzes	palegreen3	7	EGAR00002605838	FALSE	FALSE	FALSE	FALSE	FALSE	FALSE	FALSE	FALSE	TRUE	FALSE	FALSE	FALSE	FALSE
Harris_2018_PNAS	Amazonia_UnmaskedModern	Matzes	palegreen3	7	EGAR00002605832	FALSE	FALSE	FALSE	FALSE	FALSE	FALSE	FALSE	FALSE	TRUE	FALSE	FALSE	FALSE	FALSE
Harris_2018_PNAS	Amazonia_UnmaskedModern	Matzes	palegreen3	7	EGAR00002605837	FALSE	FALSE	FALSE	FALSE	FALSE	FALSE	FALSE	FALSE	TRUE	FALSE	FALSE	FALSE	FALSE
Harris_2018_PNAS	Amazonia_UnmaskedModern	Matzes	palegreen3	7	EGAR00002605833	FALSE	FALSE	FALSE	FALSE	FALSE	FALSE	FALSE	FALSE	TRUE	FALSE	FALSE	FALSE	FALSE
Harris_2018_PNAS	Amazonia_UnmaskedModern	Matzes	palegreen3	7	EGAR00002605841	FALSE	FALSE	FALSE	FALSE	FALSE	FALSE	FALSE	FALSE	TRUE	FALSE	FALSE	FALSE	FALSE
Harris_2018_PNAS	Amazonia_UnmaskedModern	Matzes	palegreen3	7	EGAR00002605836	FALSE	FALSE	FALSE	FALSE	FALSE	FALSE	FALSE	FALSE	TRUE	FALSE	FALSE	FALSE	FALSE
Harris_2018_PNAS	Amazonia_UnmaskedModern	Matzes	palegreen3	7	EGAR00002605834	FALSE	FALSE	FALSE	FALSE	FALSE	FALSE	FALSE	FALSE	TRUE	FALSE	FALSE	FALSE	FALSE
Harris_2018_PNAS	Amazonia_UnmaskedModern	Matzes	palegreen3	7	EGAR00002605835	FALSE	FALSE	FALSE	FALSE	FALSE	FALSE	FALSE	FALSE	TRUE	FALSE	FALSE	FALSE	FALSE
Harris_2018_PNAS	Amazonia_UnmaskedModern	Matzes	palegreen3	7	EGAR00002605746	FALSE	FALSE	FALSE	FALSE	FALSE	FALSE	FALSE	FALSE	TRUE	FALSE	FALSE	FALSE	FALSE
Harris_2018_PNAS	CentralAndes_UnmaskedModern	Chopccas	darkorange3	8	EGAR00002605719	FALSE	FALSE	FALSE	FALSE	FALSE	FALSE	FALSE	FALSE	TRUE	FALSE	FALSE	FALSE	FALSE
Harris_2018_PNAS	CentralAndes_UnmaskedModern	Chopccas	darkorange3	8	EGAR00002605725	FALSE	FALSE	FALSE	FALSE	FALSE	FALSE	FALSE	FALSE	TRUE	FALSE	FALSE	FALSE	FALSE
Harris_2018_PNAS	CentralAndes_UnmaskedModern	Chopccas	darkorange3	8	EGAR00002605709	FALSE	FALSE	FALSE	FALSE	FALSE	FALSE	FALSE	FALSE	TRUE	FALSE	FALSE	FALSE	FALSE
Harris_2018_PNAS	CentralAndes_UnmaskedModern	Chopccas	darkorange3	8	EGAR00002605714	FALSE	FALSE	FALSE	FALSE	FALSE	FALSE	FALSE	FALSE	TRUE	FALSE	FALSE	FALSE	FALSE
Harris_2018_PNAS	CentralAndes_UnmaskedModern	Chopccas	darkorange3	8	EGAR00002605708	FALSE	FALSE	FALSE	FALSE	FALSE	FALSE	FALSE	FALSE	TRUE	FALSE	FALSE	FALSE	FALSE
Harris_2018_PNAS	CentralAndes_UnmaskedModern	Chopccas	darkorange3	8	EGAR00002605715	FALSE	FALSE	FALSE	FALSE	FALSE	FALSE	FALSE	FALSE	TRUE	FALSE	FALSE	FALSE	FALSE
Harris_2018_PNAS	CentralAndes_UnmaskedModern	Chopccas	darkorange3	8	EGAR00002605710	FALSE	FALSE	FALSE	FALSE	FALSE	FALSE	FALSE	FALSE	TRUE	FALSE	FALSE	FALSE	FALSE
Harris_2018_PNAS	CentralAndes_UnmaskedModern	Chopccas	darkorange3	8	EGAR00002605707	FALSE	FALSE	FALSE	FALSE	FALSE	FALSE	FALSE	FALSE	TRUE	FALSE	FALSE	FALSE	FALSE
Harris_2018_PNAS	CentralAndes_UnmaskedModern	Chopccas	darkorange3	8	EGAR00002605718	FALSE	FALSE	FALSE	FALSE	FALSE	FALSE	FALSE	FALSE	TRUE	FALSE	FALSE	FALSE	FALSE
Harris_2018_PNAS	CentralAndes_UnmaskedModern	Chopccas	darkorange3	8	EGAR00002605716	FALSE	FALSE	FALSE	FALSE	FALSE	FALSE	FALSE	FALSE	TRUE	FALSE	FALSE	FALSE	FALSE
Harris_2018_PNAS	CentralAndes_UnmaskedModern	Chopccas	darkorange3	8	EGAR00002605722	FALSE	FALSE	FALSE	FALSE	FALSE	FALSE	FALSE	FALSE	TRUE	FALSE	FALSE	FALSE	FALSE
Harris_2018_PNAS	CentralAndes_UnmaskedModern	Chopccas	darkorange3	8	EGAR00002605721	FALSE	FALSE	FALSE	FALSE	FALSE	FALSE	FALSE	FALSE	TRUE	FALSE	FALSE	FALSE	FALSE
Harris_2018_PNAS	CentralAndes_UnmaskedModern	Chopccas	darkorange3	8	EGAR00002605720	FALSE	FALSE	FALSE	FALSE	FALSE	FALSE	FALSE	FALSE	TRUE	FALSE	FALSE	FALSE	FALSE
Harris_2018_PNAS	CentralAndes_UnmaskedModern	Chopccas	darkorange3	8	EGAR00002605703	FALSE	FALSE	FALSE	FALSE	FALSE	FALSE	FALSE	FALSE	TRUE	FALSE	FALSE	FALSE	FALSE
Harris_2018_PNAS	CentralAndes_UnmaskedModern	Chopccas	darkorange3	8	EGAR00002605713	FALSE	FALSE	FALSE	FALSE	FALSE	FALSE	FALSE	FALSE	TRUE	FALSE	FALSE	FALSE	FALSE
Harris_2018_PNAS	CentralAndes_UnmaskedModern	Chopccas	darkorange3	8	EGAR00002605723	FALSE	FALSE	FALSE	FALSE	FALSE	FALSE	FALSE	FALSE	TRUE	FALSE	FALSE	FALSE	FALSE
Harris_2018_PNAS	CentralAndes_UnmaskedModern	Chopccas	darkorange3	8	EGAR00002605704	FALSE	FALSE	FALSE	FALSE	FALSE	FALSE	FALSE	FALSE	TRUE	FALSE	FALSE	FALSE	FALSE
Harris_2018_PNAS	CentralAndes_UnmaskedModern	Chopccas	darkorange3	8	EGAR00002605724	FALSE	FALSE	FALSE	FALSE	FALSE	FALSE	FALSE	FALSE	TRUE	FALSE	FALSE	FALSE	FALSE
Harris_2018_PNAS	CentralAndes_UnmaskedModern	Chopccas	darkorange3	8	EGAR00002605717	FALSE	FALSE	FALSE	FALSE	FALSE	FALSE	FALSE	FALSE	TRUE	FALSE	FALSE	FALSE	FALSE
Harris_2018_PNAS	CentralAndes_UnmaskedModern	Chopccas	darkorange3	8	EGAR00002605706	FALSE	FALSE	FALSE	FALSE	FALSE	FALSE	FALSE	FALSE	TRUE	FALSE	FALSE	FALSE	FALSE
Harris_2018_PNAS	CentralAndes_UnmaskedModern	Chopccas	darkorange3	8	EGAR00002605701	FALSE	FALSE	FALSE	FALSE	FALSE	FALSE	FALSE	FALSE	TRUE	FALSE	FALSE	FALSE	FALSE
Harris_2018_PNAS	CentralAndes_UnmaskedModern	Chopccas	darkorange3	8	EGAR00002605727	FALSE	FALSE	FALSE	FALSE	FALSE	FALSE	FALSE	FALSE	TRUE	FALSE	FALSE	FALSE	FALSE
Harris_2018_PNAS	CentralAndes_UnmaskedModern	Chopccas	darkorange3	8	EGAR00002605711	FALSE	FALSE	FALSE	FALSE	FALSE	FALSE	FALSE	FALSE	TRUE	FALSE	FALSE	FALSE	FALSE
Harris_2018_PNAS	CentralAndes_UnmaskedModern	Chopccas	darkorange3	8	EGAR00002605728	FALSE	FALSE	FALSE	FALSE	FALSE	FALSE	FALSE	FALSE	TRUE	FALSE	FALSE	FALSE	FALSE
Harris_2018_PNAS	CentralAndes_UnmaskedModern	Chopccas	darkorange3	8	EGAR00002605729	FALSE	FALSE	FALSE	FALSE	FALSE	FALSE	FALSE	FALSE	TRUE	FALSE	FALSE	FALSE	FALSE
Harris_2018_PNAS	CentralAndes_UnmaskedModern	Chopccas	darkorange3	8	EGAR00002605702	FALSE	FALSE	FALSE	FALSE	FALSE	FALSE	FALSE	FALSE	TRUE	FALSE	FALSE	FALSE	FALSE
Harris_2018_PNAS	CentralAndes_UnmaskedModern	Cusco	darkorange3	9	EGAR00002605816	FALSE	FALSE	FALSE	FALSE	FALSE	FALSE	FALSE	FALSE	TRUE	FALSE	FALSE	FALSE	FALSE
Harris_2018_PNAS	CentralAndes_UnmaskedModern	Cusco	darkorange3	9	EGAR00002605735	FALSE	FALSE	FALSE	FALSE	FALSE	FALSE	FALSE	FALSE	TRUE	FALSE	FALSE	FALSE	FALSE
Harris_2018_PNAS	CentralAndes_UnmaskedModern	Cusco	darkorange3	9	EGAR00002605737	FALSE	FALSE	FALSE	FALSE	FALSE	FALSE	FALSE	FALSE	TRUE	FALSE	FALSE	FALSE	FALSE
Harris_2018_PNAS	CentralAndes_UnmaskedModern	Cusco	darkorange3	9	EGAR00002605734	FALSE	FALSE	FALSE	FALSE	FALSE	FALSE	FALSE	FALSE	TRUE	FALSE	FALSE	FALSE	FALSE
Harris_2018_PNAS	CentralAndes_UnmaskedModern	Cusco	darkorange3	9	EGAR00002605819	FALSE	FALSE	FALSE	FALSE	FALSE	FALSE	FALSE	FALSE	TRUE	FALSE	FALSE	FALSE	FALSE
Harris_2018_PNAS	CentralAndes_UnmaskedModern	Cusco	darkorange3	9	EGAR00002605739	FALSE	FALSE	FALSE	FALSE	FALSE	FALSE	FALSE	FALSE	TRUE	FALSE	FALSE	FALSE	FALSE
Harris_2018_PNAS	CentralAndes_UnmaskedModern	Cusco	darkorange3	9	EGAR00002605817	FALSE	FALSE	FALSE	FALSE	FALSE	FALSE	FALSE	FALSE	TRUE	FALSE	FALSE	FALSE	FALSE
Harris_2018_PNAS	CentralAndes_UnmaskedModern	Cusco	darkorange3	9	EGAR00002605736	FALSE	FALSE	FALSE	FALSE	FALSE	FALSE	FALSE	FALSE	TRUE	FALSE	FALSE	FALSE	FALSE
Harris_2018_PNAS	CentralAndes_UnmaskedModern	Cusco	darkorange3	9	EGAR00002605733	FALSE	FALSE	FALSE	FALSE	FALSE	FALSE	FALSE	FALSE	TRUE	FALSE	FALSE	FALSE	FALSE
Harris_2018_PNAS	CentralAndes_UnmaskedModern	Cusco	darkorange3	9	EGAR00002605730	FALSE	FALSE	FALSE	FALSE	FALSE	FALSE	FALSE	FALSE	TRUE	FALSE	FALSE	FALSE	FALSE
Harris_2018_PNAS	CentralAndes_UnmaskedModern	Cusco	darkorange3	9	EGAR00002605738	FALSE	FALSE	FALSE	FALSE	FALSE	FALSE	FALSE	FALSE	TRUE	FALSE	FALSE	FALSE	FALSE
Harris_2018_PNAS	CentralAndes_UnmaskedModern	Cusco	darkorange3	9	EGAR00002605820	FALSE	FALSE	FALSE	FALSE	FALSE	FALSE	FALSE	FALSE	TRUE	FALSE	FALSE	FALSE	FALSE
Harris_2018_PNAS	CentralAndes_UnmaskedModern	Cusco	darkorange3	9	EGAR00002605818	FALSE	FALSE	FALSE	FALSE	FALSE	FALSE	FALSE	FALSE	TRUE	FALSE	FALSE	FALSE	FALSE
Harris_2018_PNAS	CentralAndes_UnmaskedModern	Cusco	darkorange3	9	EGAR00002605732	FALSE	FALSE	FALSE	FALSE	FALSE	FALSE	FALSE	FALSE	TRUE	FALSE	FALSE	FALSE	FALSE
Harris_2018_PNAS	CentralAndes_UnmaskedModern	Cusco	darkorange3	9	EGAR00002605731	FALSE	FALSE	FALSE	FALSE	FALSE	FALSE	FALSE	FALSE	TRUE	FALSE	FALSE	FALSE	FALSE
Harris_2018_PNAS	CentralAndes_UnmaskedModern	Cusco	darkorange3	9	EGAR00002605740	FALSE	FALSE	FALSE	FALSE	FALSE	FALSE	FALSE	FALSE	TRUE	FALSE	FALSE	FALSE	FALSE
Harris_2018_PNAS	CentralAndes_UnmaskedModern	Moches	darkorange3	10	EGAR00002605851	FALSE	FALSE	FALSE	FALSE	FALSE	FALSE	FALSE	FALSE	TRUE	FALSE	FALSE	FALSE	FALSE
Harris_2018_PNAS	CentralAndes_UnmaskedModern	Moches	darkorange3	10	EGAR00002605849	FALSE	FALSE	FALSE	FALSE	FALSE	FALSE	FALSE	FALSE	TRUE	FALSE	FALSE	FALSE	FALSE
Harris_2018_PNAS	CentralAndes_UnmaskedModern	Moches	darkorange3	10	EGAR00002605868	FALSE	FALSE	FALSE	FALSE	FALSE	FALSE	FALSE	FALSE	TRUE	FALSE	FALSE	FALSE	FALSE
Harris_2018_PNAS	CentralAndes_UnmaskedModern	Moches	darkorange3	10	EGAR00002605848	FALSE	FALSE	FALSE	FALSE	FALSE	FALSE	FALSE	FALSE	TRUE	FALSE	FALSE	FALSE	FALSE
Harris_2018_PNAS	CentralAndes_UnmaskedModern	Moches	darkorange3	10	EGAR00002605869	FALSE	FALSE	FALSE	FALSE	FALSE	FALSE	FALSE	FALSE	TRUE	FALSE	FALSE	FALSE	FALSE
Harris_2018_PNAS	CentralAndes_UnmaskedModern	Moches	darkorange3	10	EGAR00002605749	FALSE	FALSE	FALSE	FALSE	FALSE	FALSE	FALSE	FALSE	TRUE	FALSE	FALSE	FALSE	FALSE
Harris_2018_PNAS	CentralAndes_UnmaskedModern	Moches	darkorange3	10	EGAR00002605855	FALSE	FALSE	FALSE	FALSE	FALSE	FALSE	FALSE	FALSE	TRUE	FALSE	FALSE	FALSE	FALSE
Harris_2018_PNAS	CentralAndes_UnmaskedModern	Moches	darkorange3	10	EGAR00002605854	FALSE	FALSE	FALSE	FALSE	FALSE	FALSE	FALSE	FALSE	TRUE	FALSE	FALSE	FALSE	FALSE
Harris_2018_PNAS	CentralAndes_UnmaskedModern	Moches	darkorange3	10	EGAR00002605862	FALSE	FALSE	FALSE	FALSE	FALSE	FALSE	FALSE	FALSE	TRUE	FALSE	FALSE	FALSE	FALSE
Harris_2018_PNAS	CentralAndes_UnmaskedModern	Moches	darkorange3	10	EGAR00002605861	FALSE	FALSE	FALSE	FALSE	FALSE	FALSE	FALSE	FALSE	TRUE	FALSE	FALSE	FALSE	FALSE
Harris_2018_PNAS	CentralAndes_UnmaskedModern	Moches	darkorange3	10	EGAR00002605850	FALSE	FALSE	FALSE	FALSE	FALSE	FALSE	FALSE	FALSE	TRUE	FALSE	FALSE	FALSE	FALSE
Harris_2018_PNAS	CentralAndes_UnmaskedModern	Moches	darkorange3	10	EGAR00002605865	FALSE	FALSE	FALSE	FALSE	FALSE	FALSE	FALSE	FALSE	TRUE	FALSE	FALSE	FALSE	FALSE
Harris_2018_PNAS	CentralAndes_UnmaskedModern	Moches	darkorange3	10	EGAR00002605852	FALSE	FALSE	FALSE	FALSE	FALSE	FALSE	FALSE	FALSE	TRUE	FALSE	FALSE	FALSE	FALSE
Harris_2018_PNAS	CentralAndes_UnmaskedModern	Moches	darkorange3	10	EGAR00002605846	FALSE	FALSE	FALSE	FALSE	FALSE	FALSE	FALSE	FALSE	TRUE	FALSE	FALSE	FALSE	FALSE
Harris_2018_PNAS	CentralAndes_UnmaskedModern	Moches	darkorange3	10	EGAR00002605844	FALSE	FALSE	FALSE	FALSE	FALSE	FALSE	FALSE	FALSE	TRUE	FALSE	FALSE	FALSE	FALSE
Harris_2018_PNAS	CentralAndes_UnmaskedModern	Moches	darkorange3	10	EGAR00002605866	FALSE	FALSE	FALSE	FALSE	FALSE	FALSE	FALSE	FALSE	TRUE	FALSE	FALSE	FALSE	FALSE
Harris_2018_PNAS	CentralAndes_UnmaskedModern	Moches	darkorange3	10	EGAR00002605847	FALSE	FALSE	FALSE	FALSE	FALSE	FALSE	FALSE	FALSE	TRUE	FALSE	FALSE	FALSE	FALSE
Harris_2018_PNAS	CentralAndes_UnmaskedModern	Moches	darkorange3	10	EGAR00002605867	FALSE	FALSE	FALSE	FALSE	FALSE	FALSE	FALSE	FALSE	TRUE	FALSE	FALSE	FALSE	FALSE
Harris_2018_PNAS	CentralAndes_UnmaskedModern	Moches	darkorange3	10	EGAR00002605864	FALSE	FALSE	FALSE	FALSE	FALSE	FALSE	FALSE	FALSE	TRUE	FALSE	FALSE	FALSE	FALSE
Harris_2018_PNAS	CentralAndes_UnmaskedModern	Moches	darkorange3	10	EGAR00002605853	FALSE	FALSE	FALSE	FALSE	FALSE	FALSE	FALSE	FALSE	TRUE	FALSE	FALSE	FALSE	FALSE
Harris_2018_PNAS	CentralAndes_UnmaskedModern	Moches	darkorange3	10	EGAR00002605748	FALSE	FALSE	FALSE	FALSE	FALSE	FALSE	FALSE	FALSE	TRUE	FALSE	FALSE	FALSE	FALSE
Harris_2018_PNAS	CentralAndes_UnmaskedModern	Moches	darkorange3	10	EGAR00002605860	FALSE	FALSE	FALSE	FALSE	FALSE	FALSE	FALSE	FALSE	TRUE	FALSE	FALSE	FALSE	FALSE
Harris_2018_PNAS	CentralAndes_UnmaskedModern	Moches	darkorange3	10	EGAR00002605843	FALSE	FALSE	FALSE	FALSE	FALSE	FALSE	FALSE	FALSE	TRUE	FALSE	FALSE	FALSE	FALSE
Harris_2018_PNAS	CentralAndes_UnmaskedModern	Moches	darkorange3	10	EGAR00002605856	FALSE	FALSE	FALSE	FALSE	FALSE	FALSE	FALSE	FALSE	TRUE	FALSE	FALSE	FALSE	FALSE
Harris_2018_PNAS	CentralAndes_UnmaskedModern	Moches	darkorange3	10	EGAR00002605859	FALSE	FALSE	FALSE	FALSE	FALSE	FALSE	FALSE	FALSE	TRUE	FALSE	FALSE	FALSE	FALSE
Harris_2018_PNAS	CentralAndes_UnmaskedModern	Moches	darkorange3	10	EGAR00002605857	FALSE	FALSE	FALSE	FALSE	FALSE	FALSE	FALSE	FALSE	TRUE	FALSE	FALSE	FALSE	FALSE
Harris_2018_PNAS	CentralAndes_UnmaskedModern	Moches	darkorange3	10	EGAR00002605845	FALSE	FALSE	FALSE	FALSE	FALSE	FALSE	FALSE	FALSE	TRUE	FALSE	FALSE	FALSE	FALSE
Harris_2018_PNAS	CentralAndes_UnmaskedModern	Moches	darkorange3	10	EGAR00002605858	FALSE	FALSE	FALSE	FALSE	FALSE	FALSE	FALSE	FALSE	TRUE	FALSE	FALSE	FALSE	FALSE
Harris_2018_PNAS	CentralAndes_UnmaskedModern	Trujillo	darkorange3	11	EGAR00002605752	FALSE	FALSE	FALSE	FALSE	FALSE	FALSE	FALSE	FALSE	TRUE	FALSE	FALSE	FALSE	FALSE
Harris_2018_PNAS	CentralAndes_UnmaskedModern	Trujillo	darkorange3	11	EGAR00002605881	FALSE	FALSE	FALSE	FALSE	FALSE	FALSE	FALSE	FALSE	TRUE	FALSE	FALSE	FALSE	FALSE
Harris_2018_PNAS	CentralAndes_UnmaskedModern	Trujillo	darkorange3	11	EGAR00002605875	FALSE	FALSE	FALSE	FALSE	FALSE	FALSE	FALSE	FALSE	TRUE	FALSE	FALSE	FALSE	FALSE
Harris_2018_PNAS	CentralAndes_UnmaskedModern	Trujillo	darkorange3	11	EGAR00002605870	FALSE	FALSE	FALSE	FALSE	FALSE	FALSE	FALSE	FALSE	TRUE	FALSE	FALSE	FALSE	FALSE
Harris_2018_PNAS	CentralAndes_UnmaskedModern	Trujillo	darkorange3	11	EGAR00002605879	FALSE	FALSE	FALSE	FALSE	FALSE	FALSE	FALSE	FALSE	TRUE	FALSE	FALSE	FALSE	FALSE
Harris_2018_PNAS	CentralAndes_UnmaskedModern	Trujillo	darkorange3	11	EGAR00002605871	FALSE	FALSE	FALSE	FALSE	FALSE	FALSE	FALSE	FALSE	TRUE	FALSE	FALSE	FALSE	FALSE
Harris_2018_PNAS	CentralAndes_UnmaskedModern	Trujillo	darkorange3	11	EGAR00002605753	FALSE	FALSE	FALSE	FALSE	FALSE	FALSE	FALSE	FALSE	TRUE	FALSE	FALSE	FALSE	FALSE
Harris_2018_PNAS	CentralAndes_UnmaskedModern	Trujillo	darkorange3	11	EGAR00002605878	FALSE	FALSE	FALSE	FALSE	FALSE	FALSE	FALSE	FALSE	TRUE	FALSE	FALSE	FALSE	FALSE
Harris_2018_PNAS	CentralAndes_UnmaskedModern	Trujillo	darkorange3	11	EGAR00002605874	FALSE	FALSE	FALSE	FALSE	FALSE	FALSE	FALSE	FALSE	TRUE	FALSE	FALSE	FALSE	FALSE
Harris_2018_PNAS	CentralAndes_UnmaskedModern	Trujillo	darkorange3	11	EGAR00002605877	FALSE	FALSE	FALSE	FALSE	FALSE	FALSE	FALSE	FALSE	TRUE	FALSE	FALSE	FALSE	FALSE
Harris_2018_PNAS	CentralAndes_UnmaskedModern	Trujillo	darkorange3	11	EGAR00002605872	FALSE	FALSE	FALSE	FALSE	FALSE	FALSE	FALSE	FALSE	TRUE	FALSE	FALSE	FALSE	FALSE
Harris_2018_PNAS	CentralAndes_UnmaskedModern	Trujillo	darkorange3	11	EGAR00002605751	FALSE	FALSE	FALSE	FALSE	FALSE	FALSE	FALSE	FALSE	TRUE	FALSE	FALSE	FALSE	FALSE
Harris_2018_PNAS	CentralAndes_UnmaskedModern	Trujillo	darkorange3	11	EGAR00002605750	FALSE	FALSE	FALSE	FALSE	FALSE	FALSE	FALSE	FALSE	TRUE	FALSE	FALSE	FALSE	FALSE
Harris_2018_PNAS	CentralAndes_UnmaskedModern	Trujillo	darkorange3	11	EGAR00002605880	FALSE	FALSE	FALSE	FALSE	FALSE	FALSE	FALSE	FALSE	TRUE	FALSE	FALSE	FALSE	FALSE
Harris_2018_PNAS	CentralAndes_UnmaskedModern	Trujillo	darkorange3	11	EGAR00002605876	FALSE	FALSE	FALSE	FALSE	FALSE	FALSE	FALSE	FALSE	TRUE	FALSE	FALSE	FALSE	FALSE
Harris_2018_PNAS	CentralAndes_UnmaskedModern	Trujillo	darkorange3	11	EGAR00002605873	FALSE	FALSE	FALSE	FALSE	FALSE	FALSE	FALSE	FALSE	TRUE	FALSE	FALSE	FALSE	FALSE
Harris_2018_PNAS	CentralAndes_UnmaskedModern	Uros	darkorange3	12	EGAR00002616859	FALSE	FALSE	FALSE	FALSE	FALSE	FALSE	FALSE	FALSE	TRUE	FALSE	FALSE	FALSE	FALSE
Harris_2018_PNAS	CentralAndes_UnmaskedModern	Uros	darkorange3	12	EGAR00002616870	FALSE	FALSE	FALSE	FALSE	FALSE	FALSE	FALSE	FALSE	TRUE	FALSE	FALSE	FALSE	FALSE
Harris_2018_PNAS	CentralAndes_UnmaskedModern	Uros	darkorange3	12	EGAR00002616862	FALSE	FALSE	FALSE	FALSE	FALSE	FALSE	FALSE	FALSE	TRUE	FALSE	FALSE	FALSE	FALSE
Harris_2018_PNAS	CentralAndes_UnmaskedModern	Uros	darkorange3	12	EGAR00002616861	FALSE	FALSE	FALSE	FALSE	FALSE	FALSE	FALSE	FALSE	TRUE	FALSE	FALSE	FALSE	FALSE
Harris_2018_PNAS	CentralAndes_UnmaskedModern	Uros	darkorange3	12	EGAR00002616857	FALSE	FALSE	FALSE	FALSE	FALSE	FALSE	FALSE	FALSE	TRUE	FALSE	FALSE	FALSE	FALSE
Harris_2018_PNAS	CentralAndes_UnmaskedModern	Uros	darkorange3	12	EGAR00002616867	FALSE	FALSE	FALSE	FALSE	FALSE	FALSE	FALSE	FALSE	TRUE	FALSE	FALSE	FALSE	FALSE
Harris_2018_PNAS	CentralAndes_UnmaskedModern	Uros	darkorange3	12	EGAR00002616858	FALSE	FALSE	FALSE	FALSE	FALSE	FALSE	FALSE	FALSE	TRUE	FALSE	FALSE	FALSE	FALSE
Harris_2018_PNAS	CentralAndes_UnmaskedModern	Uros	darkorange3	12	EGAR00002616884	FALSE	FALSE	FALSE	FALSE	FALSE	FALSE	FALSE	FALSE	TRUE	FALSE	FALSE	FALSE	FALSE
Harris_2018_PNAS	CentralAndes_UnmaskedModern	Uros	darkorange3	12	EGAR00002616863	FALSE	FALSE	FALSE	FALSE	FALSE	FALSE	FALSE	FALSE	TRUE	FALSE	FALSE	FALSE	FALSE
HGDP	Amazonia_Modern	Piapoco	palegreen2	13	HGDP00710	FALSE	FALSE	FALSE	FALSE	FALSE	FALSE	FALSE	FALSE	TRUE	FALSE	FALSE	FALSE	FALSE
HGDP	Amazonia_Modern	Piapoco	palegreen2	13	HGDP00706	FALSE	FALSE	FALSE	FALSE	FALSE	FALSE	FALSE	FALSE	TRUE	FALSE	FALSE	FALSE	FALSE
HGDP	Amazonia_Modern	Piapoco	palegreen2	13	HGDP00708	FALSE	FALSE	FALSE	FALSE	FALSE	FALSE	FALSE	FALSE	TRUE	FALSE	FALSE	FALSE	FALSE
HGDP	Amazonia_Modern	Piapoco	palegreen2	13	HGDP00970	FALSE	FALSE	FALSE	FALSE	FALSE	FALSE	FALSE	FALSE	TRUE	FALSE	FALSE	FALSE	FALSE
HGDP	Amazonia_Modern	Piapoco	palegreen2	13	HGDP00704	FALSE	FALSE	FALSE	FALSE	FALSE	FALSE	FALSE	FALSE	TRUE	FALSE	FALSE	FALSE	FALSE
HGDP	Amazonia_Modern	Piapoco	palegreen2	13	HGDP00702	FALSE	FALSE	FALSE	FALSE	FALSE	FALSE	FALSE	FALSE	TRUE	FALSE	FALSE	FALSE	FALSE
HGDP	Amazonia_UnmaskedModern	Karitiana	palegreen2	10	HGDP01019	FALSE	FALSE	FALSE	FALSE	FALSE	FALSE	FALSE	FALSE	TRUE	FALSE	FALSE	FALSE	FALSE
HGDP	Amazonia_UnmaskedModern	Karitiana	palegreen2	10	HGDP00999	FALSE	FALSE	FALSE	FALSE	FALSE	FALSE	FALSE	FALSE	TRUE	FALSE	FALSE	FALSE	FALSE
HGDP	Amazonia_UnmaskedModern	Karitiana	palegreen2	10	HGDP01009	FALSE	FALSE	FALSE	FALSE	FALSE	FALSE	FALSE	FALSE	TRUE	FALSE	FALSE	FALSE	FALSE
HGDP	Amazonia_UnmaskedModern	Karitiana	palegreen2	10	HGDP01018	FALSE	FALSE	FALSE	FALSE	FALSE	FALSE	FALSE	FALSE	TRUE	FALSE	FALSE	FALSE	FALSE
HGDP	Amazonia_UnmaskedModern	Karitiana	palegreen2	10	HGDP01015	FALSE	FALSE	FALSE	FALSE	FALSE	FALSE	FALSE	FALSE	TRUE	FALSE	FALSE	FALSE	FALSE
HGDP	Amazonia_UnmaskedModern	Karitiana	palegreen2	10	HGDP01014	FALSE	FALSE	FALSE	FALSE	FALSE	FALSE	FALSE	FALSE	TRUE	FALSE	FALSE	FALSE	FALSE
HGDP	Amazonia_UnmaskedModern	Karitiana	palegreen2	10	HGDP01001	FALSE	FALSE	FALSE	FALSE	FALSE	FALSE	FALSE	FALSE	TRUE	FALSE	FALSE	FALSE	FALSE
HGDP	Amazonia_UnmaskedModern	Karitiana	palegreen2	10	HGDP01010	FALSE	FALSE	FALSE	FALSE	FALSE	FALSE	FALSE	FALSE	TRUE	FALSE	FALSE	FALSE	FALSE
HGDP	Amazonia_UnmaskedModern	Karitiana	palegreen2	10	HGDP01012	FALSE	FALSE	FALSE	FALSE	FALSE	FALSE	FALSE	FALSE	TRUE	FALSE	FALSE	FALSE	FALSE
HGDP	Amazonia_UnmaskedModern	Karitiana	palegreen2	10	HGDP00995	FALSE	FALSE	FALSE	FALSE	FALSE	FALSE	FALSE	FALSE	TRUE	FALSE	FALSE	FALSE	FALSE
HGDP	Amazonia_UnmaskedModern	Karitiana	palegreen2	10	HGDP01013	FALSE	FALSE	FALSE	FALSE	FALSE	FALSE	FALSE	FALSE	TRUE	FALSE	FALSE	FALSE	FALSE
HGDP	Amazonia_UnmaskedModern	Surui	palegreen2	14	HGDP00846	FALSE	FALSE	FALSE	FALSE	FALSE	FALSE	FALSE	FALSE	TRUE	FALSE	FALSE	FALSE	FALSE
HGDP	Amazonia_UnmaskedModern	Surui	palegreen2	14	HGDP00832	FALSE	FALSE	FALSE	FALSE	FALSE	FALSE	FALSE	FALSE	TRUE	FALSE	FALSE	FALSE	FALSE
HGDP	Amazonia_UnmaskedModern	Surui	palegreen2	14	HGDP00837	FALSE	FALSE	FALSE	FALSE	FALSE	FALSE	FALSE	FALSE	TRUE	FALSE	FALSE	FALSE	FALSE
HGDP	Amazonia_UnmaskedModern	Surui	palegreen2	14	HGDP00843	FALSE	FALSE	FALSE	FALSE	FALSE	FALSE	FALSE	FALSE	TRUE	FALSE	FALSE	FALSE	FALSE
HGDP	Amazonia_UnmaskedModern	Surui	palegreen2	14	HGDP00845	FALSE	FALSE	FALSE	FALSE	FALSE	FALSE	FALSE	FALSE	TRUE	FALSE	FALSE	FALSE	FALSE
HGDP	Amazonia_UnmaskedModern	Surui	palegreen2	14	HGDP00849	FALSE	FALSE	FALSE	FALSE	FALSE	FALSE	FALSE	FALSE	TRUE	FALSE	FALSE	FALSE	FALSE
HGDP	Amazonia_UnmaskedModern	Surui	palegreen2	14	HGDP00852	FALSE	FALSE	FALSE	FALSE	FALSE	FALSE	FALSE	FALSE	TRUE	FALSE	FALSE	FALSE	FALSE
HGDP	Amazonia_UnmaskedModern	Surui	palegreen2	14	HGDP00838	FALSE	FALSE	FALSE	FALSE	FALSE	FALSE	FALSE	FALSE	TRUE	FALSE	FALSE	FALSE	FALSE
HGDP	CentralAmerica_UnmaskedModern	Mayan	violetred2	1	HGDP00872	FALSE	FALSE	FALSE	FALSE	FALSE	FALSE	FALSE	FALSE	TRUE	FALSE	FALSE	FALSE	FALSE
HGDP	CentralAmerica_UnmaskedModern	Mayan	violetred2	1	HGDP00865	FALSE	FALSE	FALSE	FALSE	FALSE	FALSE	FALSE	FALSE	TRUE	FALSE	FALSE	FALSE	FALSE
HGDP	CentralAmerica_UnmaskedModern	Mayan	violetred2	1	HGDP00870	FALSE	FALSE	FALSE	FALSE	FALSE	FALSE	FALSE	FALSE	TRUE	FALSE	FALSE	FALSE	FALSE
HGDP	CentralAmerica_UnmaskedModern	Mayan	violetred2	1	HGDP00869	FALSE	FALSE	FALSE	FALSE	FALSE	FALSE	FALSE	FALSE	TRUE	FALSE	FALSE	FALSE	FALSE
HGDP	CentralAmerica_UnmaskedModern	Mayan	violetred2	1	HGDP00864	FALSE	FALSE	FALSE	FALSE	FALSE	FALSE	FALSE	FALSE	TRUE	FALSE	FALSE	FALSE	FALSE
HGDP	CentralAmerica_UnmaskedModern	Mayan	violetred2	1	HGDP00861	FALSE	FALSE	FALSE	FALSE	FALSE	FALSE	FALSE	FALSE	TRUE	FALSE	FALSE	FALSE	FALSE
HGDP	CentralAmerica_UnmaskedModern	Mayan	violetred2	1	HGDP00877	FALSE	FALSE	FALSE	FALSE	FALSE	FALSE	FALSE	FALSE	TRUE	FALSE	FALSE	FALSE	FALSE
HGDP	CentralAmerica_UnmaskedModern	Mayan	violetred2	1	HGDP00873	FALSE	FALSE	FALSE	FALSE	FALSE	FALSE	FALSE	FALSE	TRUE	FALSE	FALSE	FALSE	FALSE
HGDP	CentralAmerica_UnmaskedModern	Mayan	violetred2	1	HGDP00868	FALSE	FALSE	FALSE	FALSE	FALSE	FALSE	FALSE	FALSE	TRUE	FALSE	FALSE	FALSE	FALSE
HGDP	CentralAmerica_UnmaskedModern	Mayan	violetred2	1	HGDP00862	FALSE	FALSE	FALSE	FALSE	FALSE	FALSE	FALSE	FALSE	TRUE	FALSE	FALSE	FALSE	FALSE
HGDP	CentralAmerica_UnmaskedModern	Mayan	violetred2	1	HGDP00858	FALSE	FALSE	FALSE	FALSE	FALSE	FALSE	FALSE	FALSE	TRUE	FALSE	FALSE	FALSE	FALSE
HGDP	CentralAmerica_UnmaskedModern	Mayan	violetred2	1	HGDP00863	FALSE	FALSE	FALSE	FALSE	FALSE	FALSE	FALSE	FALSE	TRUE	FALSE	FALSE	FALSE	FALSE
HGDP	CentralAmerica_UnmaskedModern	Mayan	violetred2	1	HGDP00856	FALSE	FALSE	FALSE	FALSE	FALSE	FALSE	FALSE	FALSE	TRUE	FALSE	FALSE	FALSE	FALSE
HGDP	CentralAmerica_UnmaskedModern	Mayan	violetred2	1	HGDP00875	FALSE	FALSE	FALSE	FALSE	FALSE	FALSE	FALSE	FALSE	TRUE	FALSE	FALSE	FALSE	FALSE
HGDP	CentralAmerica_UnmaskedModern	Mayan	violetred2	1	HGDP00859	FALSE	FALSE	FALSE	FALSE	FALSE	FALSE	FALSE	FALSE	TRUE	FALSE	FALSE	FALSE	FALSE
HGDP	CentralAmerica_UnmaskedModern	Mayan	violetred2	1	HGDP00855	FALSE	FALSE	FALSE	FALSE	FALSE	FALSE	FALSE	FALSE	TRUE	FALSE	FALSE	FALSE	FALSE
HGDP	CentralAmerica_UnmaskedModern	Mayan	violetred2	1	HGDP00857	FALSE	FALSE	FALSE	FALSE	FALSE	FALSE	FALSE	FALSE	TRUE	FALSE	FALSE	FALSE	FALSE
HGDP	CentralAmerica_UnmaskedModern	Mayan	violetred2	1	HGDP00854	FALSE	FALSE	FALSE	FALSE	FALSE	FALSE	FALSE	FALSE	TRUE	FALSE	FALSE	FALSE	FALSE
HGDP	CentralAmerica_UnmaskedModern	Mayan_o2	violetred2	1	HGDP00876	FALSE	FALSE	FALSE	FALSE	FALSE	FALSE	FALSE	FALSE	TRUE	FALSE	FALSE	FALSE	FALSE
HGDP	CentralAmerica_UnmaskedModern	Mayan_o2	violetred2	1	HGDP00860	FALSE	FALSE	FALSE	FALSE	FALSE	FALSE	FALSE	FALSE	TRUE	FALSE	FALSE	FALSE	FALSE
HGDP	CentralAmerica_UnmaskedModern	Mayan_o2	violetred2	1	HGDP00871	FALSE	FALSE	FALSE	FALSE	FALSE	FALSE	FALSE	FALSE	TRUE	FALSE	FALSE	FALSE	FALSE
HGDP	SouthernNorthAmerica_UnmaskedModern	Pima	blueviolet	9	HGDP01044	FALSE	FALSE	FALSE	FALSE	FALSE	FALSE	FALSE	FALSE	TRUE	FALSE	FALSE	FALSE	FALSE
HGDP	SouthernNorthAmerica_UnmaskedModern	Pima	blueviolet	9	HGDP01058	FALSE	FALSE	FALSE	FALSE	FALSE	FALSE	FALSE	FALSE	TRUE	FALSE	FALSE	FALSE	FALSE
HGDP	SouthernNorthAmerica_UnmaskedModern	Pima	blueviolet	9	HGDP01037	FALSE	FALSE	FALSE	FALSE	FALSE	FALSE	FALSE	FALSE	TRUE	FALSE	FALSE	FALSE	FALSE
HGDP	SouthernNorthAmerica_UnmaskedModern	Pima	blueviolet	9	HGDP01059	FALSE	FALSE	FALSE	FALSE	FALSE	FALSE	FALSE	FALSE	TRUE	FALSE	FALSE	FALSE	FALSE
HGDP	SouthernNorthAmerica_UnmaskedModern	Pima	blueviolet	9	HGDP01050	FALSE	FALSE	FALSE	FALSE	FALSE	FALSE	FALSE	FALSE	TRUE	FALSE	FALSE	FALSE	FALSE
HGDP	SouthernNorthAmerica_UnmaskedModern	Pima	blueviolet	9	HGDP01060	FALSE	FALSE	FALSE	FALSE	FALSE	FALSE	FALSE	FALSE	TRUE	FALSE	FALSE	FALSE	FALSE
HGDP	SouthernNorthAmerica_UnmaskedModern	Pima	blueviolet	9	CEPH_11_D12	FALSE	FALSE	FALSE	FALSE	FALSE	FALSE	FALSE	FALSE	TRUE	FALSE	FALSE	FALSE	FALSE
HGDP	SouthernNorthAmerica_UnmaskedModern	Pima	blueviolet	9	HGDP01056	FALSE	FALSE	FALSE	FALSE	FALSE	FALSE	FALSE	FALSE	TRUE	FALSE	FALSE	FALSE	FALSE
HGDP	SouthernNorthAmerica_UnmaskedModern	Pima	blueviolet	9	HGDP01057	FALSE	FALSE	FALSE	FALSE	FALSE	FALSE	FALSE	FALSE	TRUE	FALSE	FALSE	FALSE	FALSE
HGDP	SouthernNorthAmerica_UnmaskedModern	Pima	blueviolet	9	HGDP01047	FALSE	FALSE	FALSE	FALSE	FALSE	FALSE	FALSE	FALSE	TRUE	FALSE	FALSE	FALSE	FALSE
HGDP	SouthernNorthAmerica_UnmaskedModern	Pima	blueviolet	9	HGDP01055	FALSE	FALSE	FALSE	FALSE	FALSE	FALSE	FALSE	FALSE	TRUE	FALSE	FALSE	FALSE	FALSE
HGDP	SouthernNorthAmerica_UnmaskedModern	Pima	blueviolet	9	HGDP01053	FALSE	FALSE	FALSE	FALSE	FALSE	FALSE	FALSE	FALSE	TRUE	FALSE	FALSE	FALSE	FALSE
HGDP	SouthernNorthAmerica_UnmaskedModern	Pima	blueviolet	9	HGDP01043	FALSE	FALSE	FALSE	FALSE	FALSE	FALSE	FALSE	FALSE	TRUE	FALSE	FALSE	FALSE	FALSE
Homburger_2015_PlosGenetics	BsAs_Modern	BuenosAires-Homburger	grey70	23	1-52-019-3	FALSE	FALSE	FALSE	FALSE	FALSE	FALSE	FALSE	TRUE	TRUE	FALSE	FALSE	FALSE	FALSE
Homburger_2015_PlosGenetics	BsAs_Modern	BuenosAires-Homburger	grey70	23	1-52-053-3	FALSE	FALSE	FALSE	FALSE	FALSE	FALSE	FALSE	TRUE	TRUE	FALSE	FALSE	FALSE	FALSE
Homburger_2015_PlosGenetics	BsAs_Modern	BuenosAires-Homburger	grey70	23	1-52-078-3	FALSE	FALSE	FALSE	FALSE	FALSE	FALSE	FALSE	TRUE	TRUE	FALSE	FALSE	FALSE	FALSE
Homburger_2015_PlosGenetics	BsAs_Modern	BuenosAires-Homburger	grey70	23	1-52-054-3	FALSE	FALSE	FALSE	FALSE	FALSE	FALSE	FALSE	TRUE	TRUE	FALSE	FALSE	FALSE	FALSE
Homburger_2015_PlosGenetics	BsAs_Modern	BuenosAires-Homburger	grey70	23	418300	FALSE	FALSE	FALSE	FALSE	FALSE	FALSE	FALSE	TRUE	TRUE	FALSE	FALSE	FALSE	FALSE
Homburger_2015_PlosGenetics	BsAs_Modern	BuenosAires-Homburger	grey70	23	1-52-077-3	FALSE	FALSE	FALSE	FALSE	FALSE	FALSE	FALSE	TRUE	TRUE	FALSE	FALSE	FALSE	FALSE
Homburger_2015_PlosGenetics	BsAs_Modern	BuenosAires-Homburger	grey70	23	418268	FALSE	FALSE	FALSE	FALSE	FALSE	FALSE	FALSE	TRUE	TRUE	FALSE	FALSE	FALSE	FALSE
Homburger_2015_PlosGenetics	BsAs_Modern	BuenosAires-Homburger	grey70	23	418286	FALSE	FALSE	FALSE	FALSE	FALSE	FALSE	FALSE	TRUE	TRUE	FALSE	FALSE	FALSE	FALSE
Homburger_2015_PlosGenetics	BsAs_Modern	BuenosAires-Homburger	grey70	23	1-52-018-3	FALSE	FALSE	FALSE	FALSE	FALSE	FALSE	FALSE	TRUE	TRUE	FALSE	FALSE	FALSE	FALSE
Homburger_2015_PlosGenetics	BsAs_Modern	BuenosAires-Homburger	grey70	23	1-52-082-3	FALSE	FALSE	FALSE	FALSE	FALSE	FALSE	FALSE	TRUE	TRUE	FALSE	FALSE	FALSE	FALSE
Homburger_2015_PlosGenetics	BsAs_Modern	BuenosAires-Homburger	grey70	23	418288	FALSE	FALSE	FALSE	FALSE	FALSE	FALSE	FALSE	TRUE	TRUE	FALSE	FALSE	FALSE	FALSE
Homburger_2015_PlosGenetics	BsAs_Modern	BuenosAires-Homburger	grey70	23	1-52-057-3	FALSE	FALSE	FALSE	FALSE	FALSE	FALSE	FALSE	TRUE	TRUE	FALSE	FALSE	FALSE	FALSE
Homburger_2015_PlosGenetics	BsAs_Modern	BuenosAires-Homburger	grey70	23	1-52-081-3	FALSE	FALSE	FALSE	FALSE	FALSE	FALSE	FALSE	TRUE	TRUE	FALSE	FALSE	FALSE	FALSE
Homburger_2015_PlosGenetics	BsAs_Modern	BuenosAires-Homburger	grey70	23	1-50-043-3	FALSE	FALSE	FALSE	FALSE	FALSE	FALSE	FALSE	TRUE	TRUE	FALSE	FALSE	FALSE	FALSE
Homburger_2015_PlosGenetics	BsAs_Modern	BuenosAires-Homburger	grey70	23	418303	FALSE	FALSE	FALSE	FALSE	FALSE	FALSE	FALSE	TRUE	TRUE	FALSE	FALSE	FALSE	FALSE
Homburger_2015_PlosGenetics	BsAs_Modern	BuenosAires-Homburger	grey70	23	1-52-067-3	FALSE	FALSE	FALSE	FALSE	FALSE	FALSE	FALSE	TRUE	TRUE	FALSE	FALSE	FALSE	FALSE
Homburger_2015_PlosGenetics	BsAs_Modern	BuenosAires-Homburger	grey70	23	1-52-051-3	FALSE	FALSE	FALSE	FALSE	FALSE	FALSE	FALSE	TRUE	TRUE	FALSE	FALSE	FALSE	FALSE
Homburger_2015_PlosGenetics	BsAs_Modern	BuenosAires-Homburger	grey70	23	418283	FALSE	FALSE	FALSE	FALSE	FALSE	FALSE	FALSE	TRUE	TRUE	FALSE	FALSE	FALSE	FALSE
Homburger_2015_PlosGenetics	BsAs_Modern	BuenosAires-Homburger	grey70	23	1-52-024-3	FALSE	FALSE	FALSE	FALSE	FALSE	FALSE	FALSE	TRUE	TRUE	FALSE	FALSE	FALSE	FALSE
Homburger_2015_PlosGenetics	BsAs_Modern	BuenosAires-Homburger	grey70	23	418302	FALSE	FALSE	FALSE	FALSE	FALSE	FALSE	FALSE	TRUE	TRUE	FALSE	FALSE	FALSE	FALSE
Homburger_2015_PlosGenetics	BsAs_Modern	BuenosAires-Homburger	grey70	23	1-52-063-3	FALSE	FALSE	FALSE	FALSE	FALSE	FALSE	FALSE	TRUE	TRUE	FALSE	FALSE	FALSE	FALSE
Homburger_2015_PlosGenetics	BsAs_Modern	BuenosAires-Homburger	grey70	23	1-50-038-3	FALSE	FALSE	FALSE	FALSE	FALSE	FALSE	FALSE	TRUE	TRUE	FALSE	FALSE	FALSE	FALSE
Homburger_2015_PlosGenetics	BsAs_Modern	BuenosAires-Homburger	grey70	23	1-52-049-3	FALSE	FALSE	FALSE	FALSE	FALSE	FALSE	FALSE	TRUE	TRUE	FALSE	FALSE	FALSE	FALSE
Homburger_2015_PlosGenetics	BsAs_Modern	BuenosAires-Homburger	grey70	23	1-52-052-3	FALSE	FALSE	FALSE	FALSE	FALSE	FALSE	FALSE	TRUE	TRUE	FALSE	FALSE	FALSE	FALSE
Homburger_2015_PlosGenetics	BsAs_Modern	BuenosAires-Homburger	grey70	23	1-52-079-3	FALSE	FALSE	FALSE	FALSE	FALSE	FALSE	FALSE	TRUE	TRUE	FALSE	FALSE	FALSE	FALSE
Homburger_2015_PlosGenetics	BsAs_Modern	BuenosAires-Homburger	grey70	23	418277	FALSE	FALSE	FALSE	FALSE	FALSE	FALSE	FALSE	TRUE	TRUE	FALSE	FALSE	FALSE	FALSE
Homburger_2015_PlosGenetics	BsAs_Modern	BuenosAires-Homburger	grey70	23	1-52-062-3	FALSE	FALSE	FALSE	FALSE	FALSE	FALSE	FALSE	TRUE	TRUE	FALSE	FALSE	FALSE	FALSE
Homburger_2015_PlosGenetics	BsAs_Modern	BuenosAires-Homburger	grey70	23	418284	FALSE	FALSE	FALSE	FALSE	FALSE	FALSE	FALSE	TRUE	TRUE	FALSE	FALSE	FALSE	FALSE
Homburger_2015_PlosGenetics	BsAs_Modern	BuenosAires-Homburger	grey70	23	1-52-060-3	FALSE	FALSE	FALSE	FALSE	FALSE	FALSE	FALSE	TRUE	TRUE	FALSE	FALSE	FALSE	FALSE
Homburger_2015_PlosGenetics	BsAs_Modern	BuenosAires-Homburger	grey70	23	1-52-075-3	FALSE	FALSE	FALSE	FALSE	FALSE	FALSE	FALSE	TRUE	TRUE	FALSE	FALSE	FALSE	FALSE
Homburger_2015_PlosGenetics	BsAs_Modern	BuenosAires-Homburger	grey70	23	1-52-044-3	FALSE	FALSE	FALSE	FALSE	FALSE	FALSE	FALSE	TRUE	TRUE	FALSE	FALSE	FALSE	FALSE
Homburger_2015_PlosGenetics	BsAs_Modern	BuenosAires-Homburger	grey70	23	1-52-064-3	FALSE	FALSE	FALSE	FALSE	FALSE	FALSE	FALSE	TRUE	TRUE	FALSE	FALSE	FALSE	FALSE
Homburger_2015_PlosGenetics	BsAs_Modern	BuenosAires-Homburger	grey70	23	1-52-058-3	FALSE	FALSE	FALSE	FALSE	FALSE	FALSE	FALSE	TRUE	TRUE	FALSE	FALSE	FALSE	FALSE
Homburger_2015_PlosGenetics	BsAs_Modern	BuenosAires-Homburger	grey70	23	418294	FALSE	FALSE	FALSE	FALSE	FALSE	FALSE	FALSE	TRUE	TRUE	FALSE	FALSE	FALSE	FALSE
Homburger_2015_PlosGenetics	BsAs_Modern	BuenosAires-Homburger	grey70	23	1-52-070-3	FALSE	FALSE	FALSE	FALSE	FALSE	FALSE	FALSE	TRUE	TRUE	FALSE	FALSE	FALSE	FALSE
Homburger_2015_PlosGenetics	BsAs_Modern	BuenosAires-Homburger	grey70	23	1-52-071-3	FALSE	FALSE	FALSE	FALSE	FALSE	FALSE	FALSE	TRUE	TRUE	FALSE	FALSE	FALSE	FALSE
Homburger_2015_PlosGenetics	BsAs_Modern	BuenosAires-Homburger	grey70	23	418228	FALSE	FALSE	FALSE	FALSE	FALSE	FALSE	FALSE	TRUE	TRUE	FALSE	FALSE	FALSE	FALSE
Homburger_2015_PlosGenetics	BsAs_Modern	BuenosAires-Homburger	grey70	23	1-52-027-3	FALSE	FALSE	FALSE	FALSE	FALSE	FALSE	FALSE	TRUE	TRUE	FALSE	FALSE	FALSE	FALSE
Homburger_2015_PlosGenetics	BsAs_Modern	BuenosAires-Homburger	grey70	23	1-52-059-3	FALSE	FALSE	FALSE	FALSE	FALSE	FALSE	FALSE	TRUE	TRUE	FALSE	FALSE	FALSE	FALSE
Homburger_2015_PlosGenetics	BsAs_Modern	BuenosAires-Homburger	grey70	23	1-52-065-3	FALSE	FALSE	FALSE	FALSE	FALSE	FALSE	FALSE	TRUE	TRUE	FALSE	FALSE	FALSE	FALSE
Homburger_2015_PlosGenetics	BsAs_Modern	BuenosAires-Homburger	grey70	23	1-52-032-3	FALSE	FALSE	FALSE	FALSE	FALSE	FALSE	FALSE	TRUE	TRUE	FALSE	FALSE	FALSE	FALSE
Homburger_2015_PlosGenetics	BsAs_Modern	BuenosAires-Homburger	grey70	23	1-50-046-3	FALSE	FALSE	FALSE	FALSE	FALSE	FALSE	FALSE	TRUE	TRUE	FALSE	FALSE	FALSE	FALSE
Homburger_2015_PlosGenetics	BsAs_Modern	BuenosAires-Homburger	grey70	23	1-52-031-3	FALSE	FALSE	FALSE	FALSE	FALSE	FALSE	FALSE	TRUE	TRUE	FALSE	FALSE	FALSE	FALSE
Homburger_2015_PlosGenetics	BsAs_Modern	BuenosAires-Homburger	grey70	23	1-52-042-3	FALSE	FALSE	FALSE	FALSE	FALSE	FALSE	FALSE	TRUE	TRUE	FALSE	FALSE	FALSE	FALSE
Homburger_2015_PlosGenetics	BsAs_Modern	MarDelPlata-Homburger	grey70	25	418365	FALSE	FALSE	FALSE	FALSE	FALSE	FALSE	FALSE	TRUE	TRUE	FALSE	FALSE	FALSE	FALSE
Homburger_2015_PlosGenetics	BsAs_Modern	MarDelPlata-Homburger	grey70	25	418355	FALSE	FALSE	FALSE	FALSE	FALSE	FALSE	FALSE	TRUE	TRUE	FALSE	FALSE	FALSE	FALSE
Homburger_2015_PlosGenetics	BsAs_Modern	MarDelPlata-Homburger	grey70	25	418361	FALSE	FALSE	FALSE	FALSE	FALSE	FALSE	FALSE	TRUE	TRUE	FALSE	FALSE	FALSE	FALSE
Homburger_2015_PlosGenetics	BsAs_Modern	MarDelPlata-Homburger	grey70	25	418353	FALSE	FALSE	FALSE	FALSE	FALSE	FALSE	FALSE	TRUE	TRUE	FALSE	FALSE	FALSE	FALSE
Homburger_2015_PlosGenetics	BsAs_Modern	MarDelPlata-Homburger	grey70	25	418377	FALSE	FALSE	FALSE	FALSE	FALSE	FALSE	FALSE	TRUE	TRUE	FALSE	FALSE	FALSE	FALSE
Homburger_2015_PlosGenetics	BsAs_Modern	MarDelPlata-Homburger	grey70	25	418370	FALSE	FALSE	FALSE	FALSE	FALSE	FALSE	FALSE	TRUE	TRUE	FALSE	FALSE	FALSE	FALSE
Homburger_2015_PlosGenetics	BsAs_Modern	MarDelPlata-Homburger	grey70	25	418379	FALSE	FALSE	FALSE	FALSE	FALSE	FALSE	FALSE	TRUE	TRUE	FALSE	FALSE	FALSE	FALSE
Homburger_2015_PlosGenetics	BsAs_Modern	MarDelPlata-Homburger	grey70	25	418369	FALSE	FALSE	FALSE	FALSE	FALSE	FALSE	FALSE	TRUE	TRUE	FALSE	FALSE	FALSE	FALSE
Homburger_2015_PlosGenetics	BsAs_Modern	MarDelPlata-Homburger	grey70	25	418374	FALSE	FALSE	FALSE	FALSE	FALSE	FALSE	FALSE	TRUE	TRUE	FALSE	FALSE	FALSE	FALSE
Homburger_2015_PlosGenetics	BsAs_Modern	MarDelPlata-Homburger	grey70	25	418349	FALSE	FALSE	FALSE	FALSE	FALSE	FALSE	FALSE	TRUE	TRUE	FALSE	FALSE	FALSE	FALSE
Homburger_2015_PlosGenetics	BsAs_Modern	MarDelPlata-Homburger	grey70	25	418344	FALSE	FALSE	FALSE	FALSE	FALSE	FALSE	FALSE	TRUE	TRUE	FALSE	FALSE	FALSE	FALSE
Homburger_2015_PlosGenetics	BsAs_Modern	MarDelPlata-Homburger	grey70	25	418346	FALSE	FALSE	FALSE	FALSE	FALSE	FALSE	FALSE	TRUE	TRUE	FALSE	FALSE	FALSE	FALSE
Homburger_2015_PlosGenetics	BsAs_Modern	MarDelPlata-Homburger	grey70	25	418348	FALSE	FALSE	FALSE	FALSE	FALSE	FALSE	FALSE	TRUE	TRUE	FALSE	FALSE	FALSE	FALSE
Homburger_2015_PlosGenetics	Chile_Modern	StgoChile-Homburger	grey10	21	1-55-017-3	FALSE	FALSE	FALSE	FALSE	FALSE	FALSE	FALSE	TRUE	TRUE	FALSE	FALSE	FALSE	FALSE
Homburger_2015_PlosGenetics	Chile_Modern	StgoChile-Homburger	grey10	21	1-55-019-3	FALSE	FALSE	FALSE	FALSE	FALSE	FALSE	FALSE	TRUE	TRUE	FALSE	FALSE	FALSE	FALSE
Homburger_2015_PlosGenetics	Chile_Modern	StgoChile-Homburger	grey10	21	1-55-013-3	FALSE	FALSE	FALSE	FALSE	FALSE	FALSE	FALSE	TRUE	TRUE	FALSE	FALSE	FALSE	FALSE
Homburger_2015_PlosGenetics	Chile_Modern	StgoChile-Homburger	grey10	21	1-55-015-3	FALSE	FALSE	FALSE	FALSE	FALSE	FALSE	FALSE	TRUE	TRUE	FALSE	FALSE	FALSE	FALSE
Homburger_2015_PlosGenetics	Chile_Modern	StgoChile-Homburger	grey10	21	1-56-008-3	FALSE	FALSE	FALSE	FALSE	FALSE	FALSE	FALSE	TRUE	TRUE	FALSE	FALSE	FALSE	FALSE
Homburger_2015_PlosGenetics	Chile_Modern	StgoChile-Homburger	grey10	21	1-55-016-3	FALSE	FALSE	FALSE	FALSE	FALSE	FALSE	FALSE	TRUE	TRUE	FALSE	FALSE	FALSE	FALSE
Homburger_2015_PlosGenetics	Chile_Modern	StgoChile-Homburger	grey10	21	1-56-004-3	FALSE	FALSE	FALSE	FALSE	FALSE	FALSE	FALSE	TRUE	TRUE	FALSE	FALSE	FALSE	FALSE
Homburger_2015_PlosGenetics	Chile_Modern	StgoChile-Homburger	grey10	21	1-56-005-3	FALSE	FALSE	FALSE	FALSE	FALSE	FALSE	FALSE	TRUE	TRUE	FALSE	FALSE	FALSE	FALSE
Homburger_2015_PlosGenetics	Chile_Modern	StgoChile-Homburger	grey10	21	1-56-001-3	FALSE	FALSE	FALSE	FALSE	FALSE	FALSE	FALSE	TRUE	TRUE	FALSE	FALSE	FALSE	FALSE
Homburger_2015_PlosGenetics	Chile_Modern	StgoChile-Homburger	grey10	21	1-56-009-3	FALSE	FALSE	FALSE	FALSE	FALSE	FALSE	FALSE	TRUE	TRUE	FALSE	FALSE	FALSE	FALSE
Homburger_2015_PlosGenetics	Chile_Modern	StgoChile-Homburger	grey10	21	1-55-012-3	FALSE	FALSE	FALSE	FALSE	FALSE	FALSE	FALSE	TRUE	TRUE	FALSE	FALSE	FALSE	FALSE
Homburger_2015_PlosGenetics	Chile_Modern	StgoChile-Homburger	grey10	21	1-55-010-3	FALSE	FALSE	FALSE	FALSE	FALSE	FALSE	FALSE	TRUE	TRUE	FALSE	FALSE	FALSE	FALSE
Homburger_2015_PlosGenetics	Chile_Modern	StgoChile-Homburger	grey10	21	1-56-007-3	FALSE	FALSE	FALSE	FALSE	FALSE	FALSE	FALSE	TRUE	TRUE	FALSE	FALSE	FALSE	FALSE
Homburger_2015_PlosGenetics	Chile_Modern	StgoChile-Homburger	grey10	21	1-55-022-3	FALSE	FALSE	FALSE	FALSE	FALSE	FALSE	FALSE	TRUE	TRUE	FALSE	FALSE	FALSE	FALSE
Homburger_2015_PlosGenetics	Chile_Modern	StgoChile-Homburger	grey10	21	1-56-006-3	FALSE	FALSE	FALSE	FALSE	FALSE	FALSE	FALSE	TRUE	TRUE	FALSE	FALSE	FALSE	FALSE
Homburger_2015_PlosGenetics	Chile_Modern	StgoChile-Homburger	grey10	21	1-56-003-3	FALSE	FALSE	FALSE	FALSE	FALSE	FALSE	FALSE	TRUE	TRUE	FALSE	FALSE	FALSE	FALSE
Homburger_2015_PlosGenetics	Chile_Modern	StgoChile-Homburger	grey10	21	1-55-018-3	FALSE	FALSE	FALSE	FALSE	FALSE	FALSE	FALSE	TRUE	TRUE	FALSE	FALSE	FALSE	FALSE
Homburger_2015_PlosGenetics	Chile_Modern	StgoChile-Homburger	grey10	21	1-56-002-3	FALSE	FALSE	FALSE	FALSE	FALSE	FALSE	FALSE	TRUE	TRUE	FALSE	FALSE	FALSE	FALSE
Homburger_2015_PlosGenetics	Chile_Modern	StgoChile-Homburger	grey10	21	1-56-012-3	FALSE	FALSE	FALSE	FALSE	FALSE	FALSE	FALSE	TRUE	TRUE	FALSE	FALSE	FALSE	FALSE
Homburger_2015_PlosGenetics	Chile_Modern	StgoChile-Homburger	grey10	21	1-56-010-3	FALSE	FALSE	FALSE	FALSE	FALSE	FALSE	FALSE	TRUE	TRUE	FALSE	FALSE	FALSE	FALSE
Homburger_2015_PlosGenetics	Chile_Modern	StgoChile-Homburger	grey10	21	1-55-009-3	FALSE	FALSE	FALSE	FALSE	FALSE	FALSE	FALSE	TRUE	TRUE	FALSE	FALSE	FALSE	FALSE
Homburger_2015_PlosGenetics	Chile_Modern	StgoChile-Homburger	grey10	21	1-55-008-3	FALSE	FALSE	FALSE	FALSE	FALSE	FALSE	FALSE	TRUE	TRUE	FALSE	FALSE	FALSE	FALSE
Homburger_2015_PlosGenetics	Chile_Modern	StgoChile-Homburger	grey10	21	1-55-007-3	FALSE	FALSE	FALSE	FALSE	FALSE	FALSE	FALSE	TRUE	TRUE	FALSE	FALSE	FALSE	FALSE
Homburger_2015_PlosGenetics	Chile_Modern	StgoChile-Homburger	grey10	21	1-55-011-3	FALSE	FALSE	FALSE	FALSE	FALSE	FALSE	FALSE	TRUE	TRUE	FALSE	FALSE	FALSE	FALSE
Homburger_2015_PlosGenetics	Chile_Modern	StgoChile-Homburger	grey10	21	1-55-005-3	FALSE	FALSE	FALSE	FALSE	FALSE	FALSE	FALSE	TRUE	TRUE	FALSE	FALSE	FALSE	FALSE
Homburger_2015_PlosGenetics	Cordoba_Modern	CordobaCapital-Homburger	grey25	21	418245	FALSE	FALSE	FALSE	FALSE	FALSE	FALSE	FALSE	TRUE	TRUE	FALSE	FALSE	FALSE	FALSE
Homburger_2015_PlosGenetics	Cordoba_Modern	CordobaCapital-Homburger	grey25	21	418106	FALSE	FALSE	FALSE	FALSE	FALSE	FALSE	FALSE	TRUE	TRUE	FALSE	FALSE	FALSE	FALSE
Homburger_2015_PlosGenetics	Cordoba_Modern	CordobaCapital-Homburger	grey25	21	418243	FALSE	FALSE	FALSE	FALSE	FALSE	FALSE	FALSE	TRUE	TRUE	FALSE	FALSE	FALSE	FALSE
Homburger_2015_PlosGenetics	Cordoba_Modern	CordobaCapital-Homburger	grey25	21	1-73-048-3	FALSE	FALSE	FALSE	FALSE	FALSE	FALSE	FALSE	TRUE	TRUE	FALSE	FALSE	FALSE	FALSE
Homburger_2015_PlosGenetics	Cordoba_Modern	CordobaCapital-Homburger	grey25	21	418232	FALSE	FALSE	FALSE	FALSE	FALSE	FALSE	FALSE	TRUE	TRUE	FALSE	FALSE	FALSE	FALSE
Homburger_2015_PlosGenetics	Cordoba_Modern	CordobaCapital-Homburger	grey25	21	418237	FALSE	FALSE	FALSE	FALSE	FALSE	FALSE	FALSE	TRUE	TRUE	FALSE	FALSE	FALSE	FALSE
Homburger_2015_PlosGenetics	Cordoba_Modern	CordobaCapital-Homburger	grey25	21	418239	FALSE	FALSE	FALSE	FALSE	FALSE	FALSE	FALSE	TRUE	TRUE	FALSE	FALSE	FALSE	FALSE
Homburger_2015_PlosGenetics	Cordoba_Modern	CordobaCapital-Homburger	grey25	21	418100	FALSE	FALSE	FALSE	FALSE	FALSE	FALSE	FALSE	TRUE	TRUE	FALSE	FALSE	FALSE	FALSE
Homburger_2015_PlosGenetics	Cordoba_Modern	CordobaCapital-Homburger	grey25	21	418262	FALSE	FALSE	FALSE	FALSE	FALSE	FALSE	FALSE	TRUE	TRUE	FALSE	FALSE	FALSE	FALSE
Homburger_2015_PlosGenetics	Cordoba_Modern	CordobaCapital-Homburger	grey25	21	418261	FALSE	FALSE	FALSE	FALSE	FALSE	FALSE	FALSE	TRUE	TRUE	FALSE	FALSE	FALSE	FALSE
Homburger_2015_PlosGenetics	Cordoba_Modern	CordobaCapital-Homburger	grey25	21	418244	FALSE	FALSE	FALSE	FALSE	FALSE	FALSE	FALSE	TRUE	TRUE	FALSE	FALSE	FALSE	FALSE
Homburger_2015_PlosGenetics	Cordoba_Modern	CordobaCapital-Homburger	grey25	21	418231	FALSE	FALSE	FALSE	FALSE	FALSE	FALSE	FALSE	TRUE	TRUE	FALSE	FALSE	FALSE	FALSE
Homburger_2015_PlosGenetics	Cordoba_Modern	CordobaCapital-Homburger	grey25	21	418254	FALSE	FALSE	FALSE	FALSE	FALSE	FALSE	FALSE	TRUE	TRUE	FALSE	FALSE	FALSE	FALSE
Homburger_2015_PlosGenetics	Cordoba_Modern	CordobaCapital-Homburger	grey25	21	418235	FALSE	FALSE	FALSE	FALSE	FALSE	FALSE	FALSE	TRUE	TRUE	FALSE	FALSE	FALSE	FALSE
Homburger_2015_PlosGenetics	Cordoba_Modern	CordobaCapital-Homburger	grey25	21	418259	FALSE	FALSE	FALSE	FALSE	FALSE	FALSE	FALSE	TRUE	TRUE	FALSE	FALSE	FALSE	FALSE
Homburger_2015_PlosGenetics	Cordoba_Modern	CordobaCapital-Homburger	grey25	21	418248	FALSE	FALSE	FALSE	FALSE	FALSE	FALSE	FALSE	TRUE	TRUE	FALSE	FALSE	FALSE	FALSE
Homburger_2015_PlosGenetics	Cordoba_Modern	CordobaCapital-Homburger	grey25	21	418116	FALSE	FALSE	FALSE	FALSE	FALSE	FALSE	FALSE	TRUE	TRUE	FALSE	FALSE	FALSE	FALSE
Homburger_2015_PlosGenetics	Cordoba_Modern	CordobaCapital-Homburger	grey25	21	418255	FALSE	FALSE	FALSE	FALSE	FALSE	FALSE	FALSE	TRUE	TRUE	FALSE	FALSE	FALSE	FALSE
Homburger_2015_PlosGenetics	Cordoba_Modern	CordobaCapital-Homburger	grey25	21	418256	FALSE	FALSE	FALSE	FALSE	FALSE	FALSE	FALSE	TRUE	TRUE	FALSE	FALSE	FALSE	FALSE
Homburger_2015_PlosGenetics	Cordoba_Modern	CordobaCapital-Homburger	grey25	21	418252	FALSE	FALSE	FALSE	FALSE	FALSE	FALSE	FALSE	TRUE	TRUE	FALSE	FALSE	FALSE	FALSE
Homburger_2015_PlosGenetics	EntreRios_Modern	Parana-Homburger	grey85	23	418189	FALSE	FALSE	FALSE	FALSE	FALSE	FALSE	FALSE	TRUE	TRUE	FALSE	FALSE	FALSE	FALSE
Homburger_2015_PlosGenetics	Mendoza_Modern	Mendoza-Homburger	grey10	22	1-53-042-3	FALSE	FALSE	FALSE	FALSE	FALSE	FALSE	FALSE	TRUE	TRUE	FALSE	FALSE	FALSE	FALSE
Homburger_2015_PlosGenetics	Mendoza_Modern	Mendoza-Homburger	grey10	22	1-53-041-3	FALSE	FALSE	FALSE	FALSE	FALSE	FALSE	FALSE	TRUE	TRUE	FALSE	FALSE	FALSE	FALSE
Homburger_2015_PlosGenetics	Mendoza_Modern	Mendoza-Homburger	grey10	22	1-53-049-3	FALSE	FALSE	FALSE	FALSE	FALSE	FALSE	FALSE	TRUE	TRUE	FALSE	FALSE	FALSE	FALSE
Homburger_2015_PlosGenetics	Mendoza_Modern	Mendoza-Homburger	grey10	22	1-53-047-3	FALSE	FALSE	FALSE	FALSE	FALSE	FALSE	FALSE	TRUE	TRUE	FALSE	FALSE	FALSE	FALSE
Homburger_2015_PlosGenetics	Mendoza_Modern	Mendoza-Homburger	grey10	22	1-53-046-3	FALSE	FALSE	FALSE	FALSE	FALSE	FALSE	FALSE	TRUE	TRUE	FALSE	FALSE	FALSE	FALSE
Homburger_2015_PlosGenetics	Peru_Modern	Lima-Homburger	grey100	21	425746	FALSE	FALSE	FALSE	FALSE	FALSE	FALSE	FALSE	FALSE	TRUE	FALSE	FALSE	FALSE	FALSE
Homburger_2015_PlosGenetics	Peru_Modern	Lima-Homburger	grey100	21	425724	FALSE	FALSE	FALSE	FALSE	FALSE	FALSE	FALSE	FALSE	TRUE	FALSE	FALSE	FALSE	FALSE
Homburger_2015_PlosGenetics	Peru_Modern	Lima-Homburger	grey100	21	425743	FALSE	FALSE	FALSE	FALSE	FALSE	FALSE	FALSE	FALSE	TRUE	FALSE	FALSE	FALSE	FALSE
Homburger_2015_PlosGenetics	Peru_Modern	Lima-Homburger	grey100	21	425741	FALSE	FALSE	FALSE	FALSE	FALSE	FALSE	FALSE	FALSE	TRUE	FALSE	FALSE	FALSE	FALSE
Homburger_2015_PlosGenetics	Peru_Modern	Lima-Homburger	grey100	21	425781	FALSE	FALSE	FALSE	FALSE	FALSE	FALSE	FALSE	FALSE	TRUE	FALSE	FALSE	FALSE	FALSE
Homburger_2015_PlosGenetics	Peru_Modern	Lima-Homburger	grey100	21	425747	FALSE	FALSE	FALSE	FALSE	FALSE	FALSE	FALSE	FALSE	TRUE	FALSE	FALSE	FALSE	FALSE
Homburger_2015_PlosGenetics	Peru_Modern	Lima-Homburger	grey100	21	425721	FALSE	FALSE	FALSE	FALSE	FALSE	FALSE	FALSE	FALSE	TRUE	FALSE	FALSE	FALSE	FALSE
Homburger_2015_PlosGenetics	Peru_Modern	Lima-Homburger	grey100	21	425745	FALSE	FALSE	FALSE	FALSE	FALSE	FALSE	FALSE	FALSE	TRUE	FALSE	FALSE	FALSE	FALSE
Homburger_2015_PlosGenetics	Peru_Modern	Lima-Homburger	grey100	21	425783	FALSE	FALSE	FALSE	FALSE	FALSE	FALSE	FALSE	FALSE	TRUE	FALSE	FALSE	FALSE	FALSE
Homburger_2015_PlosGenetics	Peru_Modern	Lima-Homburger	grey100	21	425785	FALSE	FALSE	FALSE	FALSE	FALSE	FALSE	FALSE	FALSE	TRUE	FALSE	FALSE	FALSE	FALSE
Homburger_2015_PlosGenetics	Peru_Modern	Lima-Homburger	grey100	21	425778	FALSE	FALSE	FALSE	FALSE	FALSE	FALSE	FALSE	FALSE	TRUE	FALSE	FALSE	FALSE	FALSE
Homburger_2015_PlosGenetics	Peru_Modern	Lima-Homburger	grey100	21	425713	FALSE	FALSE	FALSE	FALSE	FALSE	FALSE	FALSE	FALSE	TRUE	FALSE	FALSE	FALSE	FALSE
Homburger_2015_PlosGenetics	Peru_Modern	Lima-Homburger	grey100	21	425784	FALSE	FALSE	FALSE	FALSE	FALSE	FALSE	FALSE	FALSE	TRUE	FALSE	FALSE	FALSE	FALSE
Homburger_2015_PlosGenetics	Peru_Modern	Lima-Homburger	grey100	21	425755	FALSE	FALSE	FALSE	FALSE	FALSE	FALSE	FALSE	FALSE	TRUE	FALSE	FALSE	FALSE	FALSE
Homburger_2015_PlosGenetics	Peru_Modern	Lima-Homburger	grey100	21	425735	FALSE	FALSE	FALSE	FALSE	FALSE	FALSE	FALSE	FALSE	TRUE	FALSE	FALSE	FALSE	FALSE
Homburger_2015_PlosGenetics	Peru_Modern	Lima-Homburger	grey100	21	425770	FALSE	FALSE	FALSE	FALSE	FALSE	FALSE	FALSE	FALSE	TRUE	FALSE	FALSE	FALSE	FALSE
Homburger_2015_PlosGenetics	Peru_Modern	Lima-Homburger	grey100	21	425777	FALSE	FALSE	FALSE	FALSE	FALSE	FALSE	FALSE	FALSE	TRUE	FALSE	FALSE	FALSE	FALSE
Homburger_2015_PlosGenetics	Peru_Modern	Lima-Homburger	grey100	21	425720	FALSE	FALSE	FALSE	FALSE	FALSE	FALSE	FALSE	FALSE	TRUE	FALSE	FALSE	FALSE	FALSE
Homburger_2015_PlosGenetics	Peru_Modern	Lima-Homburger	grey100	21	425715	FALSE	FALSE	FALSE	FALSE	FALSE	FALSE	FALSE	FALSE	TRUE	FALSE	FALSE	FALSE	FALSE
Homburger_2015_PlosGenetics	Peru_Modern	Lima-Homburger	grey100	21	425790	FALSE	FALSE	FALSE	FALSE	FALSE	FALSE	FALSE	FALSE	TRUE	FALSE	FALSE	FALSE	FALSE
Homburger_2015_PlosGenetics	Peru_Modern	Lima-Homburger	grey100	21	425726	FALSE	FALSE	FALSE	FALSE	FALSE	FALSE	FALSE	FALSE	TRUE	FALSE	FALSE	FALSE	FALSE
Homburger_2015_PlosGenetics	Peru_Modern	Lima-Homburger	grey100	21	425729	FALSE	FALSE	FALSE	FALSE	FALSE	FALSE	FALSE	FALSE	TRUE	FALSE	FALSE	FALSE	FALSE
Homburger_2015_PlosGenetics	Peru_Modern	Lima-Homburger	grey100	21	425776	FALSE	FALSE	FALSE	FALSE	FALSE	FALSE	FALSE	FALSE	TRUE	FALSE	FALSE	FALSE	FALSE
Homburger_2015_PlosGenetics	Peru_Modern	Lima-Homburger	grey100	21	425754	FALSE	FALSE	FALSE	FALSE	FALSE	FALSE	FALSE	FALSE	TRUE	FALSE	FALSE	FALSE	FALSE
Homburger_2015_PlosGenetics	Peru_Modern	Lima-Homburger	grey100	21	425782	FALSE	FALSE	FALSE	FALSE	FALSE	FALSE	FALSE	FALSE	TRUE	FALSE	FALSE	FALSE	FALSE
Homburger_2015_PlosGenetics	Peru_Modern	Lima-Homburger	grey100	21	425711	FALSE	FALSE	FALSE	FALSE	FALSE	FALSE	FALSE	FALSE	TRUE	FALSE	FALSE	FALSE	FALSE
Homburger_2015_PlosGenetics	Peru_Modern	Lima-Homburger	grey100	21	425712	FALSE	FALSE	FALSE	FALSE	FALSE	FALSE	FALSE	FALSE	TRUE	FALSE	FALSE	FALSE	FALSE
Homburger_2015_PlosGenetics	Peru_Modern	Lima-Homburger	grey100	21	425768	FALSE	FALSE	FALSE	FALSE	FALSE	FALSE	FALSE	FALSE	TRUE	FALSE	FALSE	FALSE	FALSE
Homburger_2015_PlosGenetics	Peru_Modern	Lima-Homburger	grey100	21	425756	FALSE	FALSE	FALSE	FALSE	FALSE	FALSE	FALSE	FALSE	TRUE	FALSE	FALSE	FALSE	FALSE
Homburger_2015_PlosGenetics	Peru_Modern	Lima-Homburger	grey100	21	425719	FALSE	FALSE	FALSE	FALSE	FALSE	FALSE	FALSE	FALSE	TRUE	FALSE	FALSE	FALSE	FALSE
Homburger_2015_PlosGenetics	Peru_Modern	Lima-Homburger	grey100	21	425775	FALSE	FALSE	FALSE	FALSE	FALSE	FALSE	FALSE	FALSE	TRUE	FALSE	FALSE	FALSE	FALSE
Homburger_2015_PlosGenetics	Peru_Modern	Lima-Homburger	grey100	21	425718	FALSE	FALSE	FALSE	FALSE	FALSE	FALSE	FALSE	FALSE	TRUE	FALSE	FALSE	FALSE	FALSE
Homburger_2015_PlosGenetics	Peru_Modern	Lima-Homburger	grey100	21	425748	FALSE	FALSE	FALSE	FALSE	FALSE	FALSE	FALSE	FALSE	TRUE	FALSE	FALSE	FALSE	FALSE
Homburger_2015_PlosGenetics	Peru_Modern	Lima-Homburger	grey100	21	425779	FALSE	FALSE	FALSE	FALSE	FALSE	FALSE	FALSE	FALSE	TRUE	FALSE	FALSE	FALSE	FALSE
Homburger_2015_PlosGenetics	Peru_Modern	Lima-Homburger	grey100	21	425780	FALSE	FALSE	FALSE	FALSE	FALSE	FALSE	FALSE	FALSE	TRUE	FALSE	FALSE	FALSE	FALSE
Homburger_2015_PlosGenetics	Peru_Modern	Lima-Homburger	grey100	21	425751	FALSE	FALSE	FALSE	FALSE	FALSE	FALSE	FALSE	FALSE	TRUE	FALSE	FALSE	FALSE	FALSE
Homburger_2015_PlosGenetics	Peru_Modern	Lima-Homburger	grey100	21	425709	FALSE	FALSE	FALSE	FALSE	FALSE	FALSE	FALSE	FALSE	TRUE	FALSE	FALSE	FALSE	FALSE
Homburger_2015_PlosGenetics	Peru_Modern	Lima-Homburger	grey100	21	425753	FALSE	FALSE	FALSE	FALSE	FALSE	FALSE	FALSE	FALSE	TRUE	FALSE	FALSE	FALSE	FALSE
Homburger_2015_PlosGenetics	Peru_Modern	Lima-Homburger	grey100	21	425794	FALSE	FALSE	FALSE	FALSE	FALSE	FALSE	FALSE	FALSE	TRUE	FALSE	FALSE	FALSE	FALSE
Homburger_2015_PlosGenetics	Peru_Modern	Lima-Homburger	grey100	21	425795	FALSE	FALSE	FALSE	FALSE	FALSE	FALSE	FALSE	FALSE	TRUE	FALSE	FALSE	FALSE	FALSE
Homburger_2015_PlosGenetics	Peru_Modern	Lima-Homburger	grey100	21	425793	FALSE	FALSE	FALSE	FALSE	FALSE	FALSE	FALSE	FALSE	TRUE	FALSE	FALSE	FALSE	FALSE
Homburger_2015_PlosGenetics	Peru_Modern	Lima-Homburger	grey100	21	425714	FALSE	FALSE	FALSE	FALSE	FALSE	FALSE	FALSE	FALSE	TRUE	FALSE	FALSE	FALSE	FALSE
Homburger_2015_PlosGenetics	Peru_Modern	Lima-Homburger	grey100	21	425757	FALSE	FALSE	FALSE	FALSE	FALSE	FALSE	FALSE	FALSE	TRUE	FALSE	FALSE	FALSE	FALSE
Homburger_2015_PlosGenetics	Peru_Modern	Lima-Homburger	grey100	21	425786	FALSE	FALSE	FALSE	FALSE	FALSE	FALSE	FALSE	FALSE	TRUE	FALSE	FALSE	FALSE	FALSE
Homburger_2015_PlosGenetics	Peru_Modern	Lima-Homburger	grey100	21	425774	FALSE	FALSE	FALSE	FALSE	FALSE	FALSE	FALSE	FALSE	TRUE	FALSE	FALSE	FALSE	FALSE
Homburger_2015_PlosGenetics	Peru_Modern	Lima-Homburger	grey100	21	425788	FALSE	FALSE	FALSE	FALSE	FALSE	FALSE	FALSE	FALSE	TRUE	FALSE	FALSE	FALSE	FALSE
Homburger_2015_PlosGenetics	Peru_Modern	Lima-Homburger	grey100	21	425752	FALSE	FALSE	FALSE	FALSE	FALSE	FALSE	FALSE	FALSE	TRUE	FALSE	FALSE	FALSE	FALSE
Homburger_2015_PlosGenetics	Peru_Modern	Lima-Homburger	grey100	21	425789	FALSE	FALSE	FALSE	FALSE	FALSE	FALSE	FALSE	FALSE	TRUE	FALSE	FALSE	FALSE	FALSE
Homburger_2015_PlosGenetics	Peru_Modern	Lima-Homburger	grey100	21	425750	FALSE	FALSE	FALSE	FALSE	FALSE	FALSE	FALSE	FALSE	TRUE	FALSE	FALSE	FALSE	FALSE
Homburger_2015_PlosGenetics	Peru_Modern	Lima-Homburger	grey100	21	425792	FALSE	FALSE	FALSE	FALSE	FALSE	FALSE	FALSE	FALSE	TRUE	FALSE	FALSE	FALSE	FALSE
Homburger_2015_PlosGenetics	Peru_Modern	Lima-Homburger	grey100	21	425766	FALSE	FALSE	FALSE	FALSE	FALSE	FALSE	FALSE	FALSE	TRUE	FALSE	FALSE	FALSE	FALSE
Homburger_2015_PlosGenetics	Peru_Modern	Lima-Homburger	grey100	21	425767	FALSE	FALSE	FALSE	FALSE	FALSE	FALSE	FALSE	FALSE	TRUE	FALSE	FALSE	FALSE	FALSE
Homburger_2015_PlosGenetics	Peru_Modern	Lima-Homburger	grey100	21	425710	FALSE	FALSE	FALSE	FALSE	FALSE	FALSE	FALSE	FALSE	TRUE	FALSE	FALSE	FALSE	FALSE
Homburger_2015_PlosGenetics	Peru_Modern	Lima-Homburger	grey100	21	425759	FALSE	FALSE	FALSE	FALSE	FALSE	FALSE	FALSE	FALSE	TRUE	FALSE	FALSE	FALSE	FALSE
Homburger_2015_PlosGenetics	Peru_Modern	Lima-Homburger	grey100	21	425769	FALSE	FALSE	FALSE	FALSE	FALSE	FALSE	FALSE	FALSE	TRUE	FALSE	FALSE	FALSE	FALSE
Homburger_2015_PlosGenetics	Peru_Modern	Lima-Homburger	grey100	21	425799	FALSE	FALSE	FALSE	FALSE	FALSE	FALSE	FALSE	FALSE	TRUE	FALSE	FALSE	FALSE	FALSE
Homburger_2015_PlosGenetics	Peru_Modern	Lima-Homburger	grey100	21	425716	FALSE	FALSE	FALSE	FALSE	FALSE	FALSE	FALSE	FALSE	TRUE	FALSE	FALSE	FALSE	FALSE
Homburger_2015_PlosGenetics	Peru_Modern	Lima-Homburger	grey100	21	425749	FALSE	FALSE	FALSE	FALSE	FALSE	FALSE	FALSE	FALSE	TRUE	FALSE	FALSE	FALSE	FALSE
Homburger_2015_PlosGenetics	Peru_Modern	Lima-Homburger	grey100	21	425787	FALSE	FALSE	FALSE	FALSE	FALSE	FALSE	FALSE	FALSE	TRUE	FALSE	FALSE	FALSE	FALSE
Homburger_2015_PlosGenetics	Peru_Modern	Lima-Homburger	grey100	21	425723	FALSE	FALSE	FALSE	FALSE	FALSE	FALSE	FALSE	FALSE	TRUE	FALSE	FALSE	FALSE	FALSE
Homburger_2015_PlosGenetics	Peru_Modern	Lima-Homburger	grey100	21	425761	FALSE	FALSE	FALSE	FALSE	FALSE	FALSE	FALSE	FALSE	TRUE	FALSE	FALSE	FALSE	FALSE
Homburger_2015_PlosGenetics	Peru_Modern	Lima-Homburger	grey100	21	425706	FALSE	FALSE	FALSE	FALSE	FALSE	FALSE	FALSE	FALSE	TRUE	FALSE	FALSE	FALSE	FALSE
Homburger_2015_PlosGenetics	Peru_Modern	Lima-Homburger	grey100	21	425765	FALSE	FALSE	FALSE	FALSE	FALSE	FALSE	FALSE	FALSE	TRUE	FALSE	FALSE	FALSE	FALSE
Homburger_2015_PlosGenetics	Peru_Modern	Lima-Homburger	grey100	21	425708	FALSE	FALSE	FALSE	FALSE	FALSE	FALSE	FALSE	FALSE	TRUE	FALSE	FALSE	FALSE	FALSE
Homburger_2015_PlosGenetics	Peru_Modern	Lima-Homburger	grey100	21	425764	FALSE	FALSE	FALSE	FALSE	FALSE	FALSE	FALSE	FALSE	TRUE	FALSE	FALSE	FALSE	FALSE
Homburger_2015_PlosGenetics	Peru_Modern	Lima-Homburger	grey100	21	425797	FALSE	FALSE	FALSE	FALSE	FALSE	FALSE	FALSE	FALSE	TRUE	FALSE	FALSE	FALSE	FALSE
Homburger_2015_PlosGenetics	Peru_Modern	Lima-Homburger	grey100	21	425771	FALSE	FALSE	FALSE	FALSE	FALSE	FALSE	FALSE	FALSE	TRUE	FALSE	FALSE	FALSE	FALSE
Homburger_2015_PlosGenetics	Peru_Modern	Lima-Homburger	grey100	21	425717	FALSE	FALSE	FALSE	FALSE	FALSE	FALSE	FALSE	FALSE	TRUE	FALSE	FALSE	FALSE	FALSE
Homburger_2015_PlosGenetics	Peru_Modern	Lima-Homburger	grey100	21	425705	FALSE	FALSE	FALSE	FALSE	FALSE	FALSE	FALSE	FALSE	TRUE	FALSE	FALSE	FALSE	FALSE
Homburger_2015_PlosGenetics	Peru_Modern	Lima-Homburger	grey100	21	425760	FALSE	FALSE	FALSE	FALSE	FALSE	FALSE	FALSE	FALSE	TRUE	FALSE	FALSE	FALSE	FALSE
Homburger_2015_PlosGenetics	Peru_Modern	Lima-Homburger	grey100	21	425704	FALSE	FALSE	FALSE	FALSE	FALSE	FALSE	FALSE	FALSE	TRUE	FALSE	FALSE	FALSE	FALSE
Homburger_2015_PlosGenetics	Peru_Modern	Lima-Homburger	grey100	21	425791	FALSE	FALSE	FALSE	FALSE	FALSE	FALSE	FALSE	FALSE	TRUE	FALSE	FALSE	FALSE	FALSE
Homburger_2015_PlosGenetics	Peru_Modern	Lima-Homburger	grey100	21	425762	FALSE	FALSE	FALSE	FALSE	FALSE	FALSE	FALSE	FALSE	TRUE	FALSE	FALSE	FALSE	FALSE
Homburger_2015_PlosGenetics	Peru_Modern	Lima-Homburger	grey100	21	425763	FALSE	FALSE	FALSE	FALSE	FALSE	FALSE	FALSE	FALSE	TRUE	FALSE	FALSE	FALSE	FALSE
Homburger_2015_PlosGenetics	Peru_Modern	Lima-Homburger	grey100	21	425796	FALSE	FALSE	FALSE	FALSE	FALSE	FALSE	FALSE	FALSE	TRUE	FALSE	FALSE	FALSE	FALSE
Homburger_2015_PlosGenetics	Peru_Modern	Lima-Homburger	grey100	21	425758	FALSE	FALSE	FALSE	FALSE	FALSE	FALSE	FALSE	FALSE	TRUE	FALSE	FALSE	FALSE	FALSE
Homburger_2015_PlosGenetics	Peru_Modern	Lima-Homburger	grey100	21	425707	FALSE	FALSE	FALSE	FALSE	FALSE	FALSE	FALSE	FALSE	TRUE	FALSE	FALSE	FALSE	FALSE
Homburger_2015_PlosGenetics	SantaFe_Modern	Rosario-Homburger	grey85	24	418148	FALSE	FALSE	FALSE	FALSE	FALSE	FALSE	FALSE	TRUE	TRUE	FALSE	FALSE	FALSE	FALSE
Homburger_2015_PlosGenetics	SantaFe_Modern	Rosario-Homburger	grey85	24	418141	FALSE	FALSE	FALSE	FALSE	FALSE	FALSE	FALSE	TRUE	TRUE	FALSE	FALSE	FALSE	FALSE
Homburger_2015_PlosGenetics	SantaFe_Modern	Rosario-Homburger	grey85	24	418161	FALSE	FALSE	FALSE	FALSE	FALSE	FALSE	FALSE	TRUE	TRUE	FALSE	FALSE	FALSE	FALSE
Homburger_2015_PlosGenetics	SantaFe_Modern	Rosario-Homburger	grey85	24	418181	FALSE	FALSE	FALSE	FALSE	FALSE	FALSE	FALSE	TRUE	TRUE	FALSE	FALSE	FALSE	FALSE
Homburger_2015_PlosGenetics	SantaFe_Modern	Rosario-Homburger	grey85	24	418142	FALSE	FALSE	FALSE	FALSE	FALSE	FALSE	FALSE	TRUE	TRUE	FALSE	FALSE	FALSE	FALSE
Homburger_2015_PlosGenetics	SantaFe_Modern	Rosario-Homburger	grey85	24	418160	FALSE	FALSE	FALSE	FALSE	FALSE	FALSE	FALSE	TRUE	TRUE	FALSE	FALSE	FALSE	FALSE
Homburger_2015_PlosGenetics	SantaFe_Modern	Rosario-Homburger	grey85	24	418179	FALSE	FALSE	FALSE	FALSE	FALSE	FALSE	FALSE	TRUE	TRUE	FALSE	FALSE	FALSE	FALSE
Homburger_2015_PlosGenetics	SantaFe_Modern	Rosario-Homburger	grey85	24	418163	FALSE	FALSE	FALSE	FALSE	FALSE	FALSE	FALSE	TRUE	TRUE	FALSE	FALSE	FALSE	FALSE
Homburger_2015_PlosGenetics	SantaFe_Modern	Rosario-Homburger	grey85	24	418169	FALSE	FALSE	FALSE	FALSE	FALSE	FALSE	FALSE	TRUE	TRUE	FALSE	FALSE	FALSE	FALSE
Homburger_2015_PlosGenetics	SantaFe_Modern	Rosario-Homburger	grey85	24	418165	FALSE	FALSE	FALSE	FALSE	FALSE	FALSE	FALSE	TRUE	TRUE	FALSE	FALSE	FALSE	FALSE
Homburger_2015_PlosGenetics	SantaFe_Modern	Rosario-Homburger	grey85	24	418210	FALSE	FALSE	FALSE	FALSE	FALSE	FALSE	FALSE	TRUE	TRUE	FALSE	FALSE	FALSE	FALSE
Homburger_2015_PlosGenetics	SantaFe_Modern	SantaFe-Homburger	grey85	25	418342	FALSE	FALSE	FALSE	FALSE	FALSE	FALSE	FALSE	TRUE	TRUE	FALSE	FALSE	FALSE	FALSE
Homburger_2015_PlosGenetics	SantaFe_Modern	SantaFe-Homburger	grey85	25	418338	FALSE	FALSE	FALSE	FALSE	FALSE	FALSE	FALSE	TRUE	TRUE	FALSE	FALSE	FALSE	FALSE
Homburger_2015_PlosGenetics	SantaFe_Modern	SantaFe-Homburger	grey85	25	418325	FALSE	FALSE	FALSE	FALSE	FALSE	FALSE	FALSE	TRUE	TRUE	FALSE	FALSE	FALSE	FALSE
Homburger_2015_PlosGenetics	SantaFe_Modern	SantaFe-Homburger	grey85	25	418340	FALSE	FALSE	FALSE	FALSE	FALSE	FALSE	FALSE	TRUE	TRUE	FALSE	FALSE	FALSE	FALSE
Homburger_2015_PlosGenetics	SantaFe_Modern	SantaFe-Homburger	grey85	25	1-54-010-3	FALSE	FALSE	FALSE	FALSE	FALSE	FALSE	FALSE	TRUE	TRUE	FALSE	FALSE	FALSE	FALSE
Homburger_2015_PlosGenetics	SantaFe_Modern	SantaFe-Homburger	grey85	25	418312	FALSE	FALSE	FALSE	FALSE	FALSE	FALSE	FALSE	TRUE	TRUE	FALSE	FALSE	FALSE	FALSE
Homburger_2015_PlosGenetics	SantaFe_Modern	SantaFe-Homburger	grey85	25	1-54-011-3	FALSE	FALSE	FALSE	FALSE	FALSE	FALSE	FALSE	TRUE	TRUE	FALSE	FALSE	FALSE	FALSE
Homburger_2015_PlosGenetics	SantaFe_Modern	SantaFe-Homburger	grey85	25	1-54-002-3	FALSE	FALSE	FALSE	FALSE	FALSE	FALSE	FALSE	TRUE	TRUE	FALSE	FALSE	FALSE	FALSE
Homburger_2015_PlosGenetics	SantaFe_Modern	SantaFe-Homburger	grey85	25	418314	FALSE	FALSE	FALSE	FALSE	FALSE	FALSE	FALSE	TRUE	TRUE	FALSE	FALSE	FALSE	FALSE
Homburger_2015_PlosGenetics	SantaFe_Modern	SantaFe-Homburger	grey85	25	1-54-019-3	FALSE	FALSE	FALSE	FALSE	FALSE	FALSE	FALSE	TRUE	TRUE	FALSE	FALSE	FALSE	FALSE
Homburger_2015_PlosGenetics	SantaFe_Modern	SantaFe-Homburger	grey85	25	1-54-015-3	FALSE	FALSE	FALSE	FALSE	FALSE	FALSE	FALSE	TRUE	TRUE	FALSE	FALSE	FALSE	FALSE
Homburger_2015_PlosGenetics	SantaFe_Modern	SantaFe-Homburger	grey85	25	418311	FALSE	FALSE	FALSE	FALSE	FALSE	FALSE	FALSE	TRUE	TRUE	FALSE	FALSE	FALSE	FALSE
Homburger_2015_PlosGenetics	SantaFe_Modern	SantaFe-Homburger	grey85	25	418328	FALSE	FALSE	FALSE	FALSE	FALSE	FALSE	FALSE	TRUE	TRUE	FALSE	FALSE	FALSE	FALSE
Homburger_2015_PlosGenetics	SantaFe_Modern	SantaFe-Homburger	grey85	25	418317	FALSE	FALSE	FALSE	FALSE	FALSE	FALSE	FALSE	TRUE	TRUE	FALSE	FALSE	FALSE	FALSE
Kennett_2017_NatComm	SouthernNorthAmerica_LH	USA_NM_Chaco.Capt	blueviolet	4	I2719	FALSE	FALSE	FALSE	FALSE	TRUE	FALSE	TRUE	FALSE	FALSE	FALSE	FALSE	FALSE	FALSE
Kennett_2017_NatComm	SouthernNorthAmerica_LH	USA_NM_Chaco.Capt	blueviolet	4	I2717	FALSE	FALSE	FALSE	FALSE	TRUE	FALSE	TRUE	FALSE	FALSE	FALSE	FALSE	FALSE	FALSE
Kennett_2017_NatComm	SouthernNorthAmerica_LH	USA_NM_Chaco.Capt	blueviolet	4	I2716	FALSE	FALSE	FALSE	FALSE	TRUE	FALSE	TRUE	FALSE	FALSE	FALSE	FALSE	FALSE	FALSE
Kennett_2022_NatComm	CentralAmerica_EH	Belize_8800BP.Capt	mediumvioletred	22	I19169	FALSE	FALSE	FALSE	FALSE	TRUE	FALSE	TRUE	FALSE	FALSE	FALSE	FALSE	FALSE	FALSE
Kennett_2022_NatComm	CentralAmerica_MH	Belize_3600BP.Capt	darkviolet	24	I24540	FALSE	FALSE	FALSE	FALSE	TRUE	TRUE	TRUE	FALSE	TRUE	FALSE	FALSE	FALSE	FALSE
Kennett_2022_NatComm	CentralAmerica_MH	Belize_4000BP.Capt	darkviolet	23	I8041	FALSE	FALSE	FALSE	FALSE	TRUE	FALSE	TRUE	FALSE	FALSE	FALSE	TRUE	FALSE	FALSE
Kennett_2022_NatComm	CentralAmerica_MH	Belize_4000BP.Capt	darkviolet	23	I7543	FALSE	FALSE	FALSE	FALSE	TRUE	FALSE	TRUE	FALSE	FALSE	FALSE	TRUE	FALSE	FALSE
Kennett_2022_NatComm	CentralAmerica_MH	Belize_4600BP.Capt	darkviolet	22	I6236	FALSE	FALSE	FALSE	FALSE	TRUE	TRUE	TRUE	FALSE	TRUE	FALSE	TRUE	TRUE	FALSE
Kennett_2022_NatComm	CentralAmerica_MH	Belize_4600BP.Capt	darkviolet	22	I6235	FALSE	FALSE	FALSE	FALSE	TRUE	TRUE	TRUE	FALSE	TRUE	FALSE	TRUE	TRUE	FALSE
Kennett_2022_NatComm	CentralAmerica_MH	Belize_4600BP.Capt	darkviolet	22	I5455	FALSE	FALSE	FALSE	FALSE	TRUE	TRUE	TRUE	FALSE	TRUE	FALSE	TRUE	TRUE	FALSE
Kennett_2022_NatComm	CentralAmerica_MH	Belize_4600BP.Capt	darkviolet	22	I24542	FALSE	FALSE	FALSE	FALSE	TRUE	TRUE	TRUE	FALSE	TRUE	FALSE	TRUE	FALSE	FALSE
Kennett_2022_NatComm	CentralAmerica_MH	Belize_4600BP.Capt	darkviolet	22	I19950	FALSE	FALSE	FALSE	FALSE	TRUE	TRUE	TRUE	FALSE	TRUE	FALSE	TRUE	TRUE	FALSE
Kennett_2022_NatComm	CentralAmerica_MH	Belize_4900BP.Capt	darkviolet	21	I5454	FALSE	FALSE	FALSE	FALSE	TRUE	TRUE	TRUE	FALSE	TRUE	FALSE	TRUE	TRUE	FALSE
Kennett_2022_NatComm	CentralAmerica_MH	Belize_4900BP.Capt	darkviolet	21	I19944	FALSE	FALSE	FALSE	FALSE	TRUE	FALSE	TRUE	FALSE	FALSE	FALSE	TRUE	FALSE	FALSE
Kennett_2022_NatComm	CentralAmerica_MH	Belize_4900BP.Capt	darkviolet	21	I19942	FALSE	FALSE	FALSE	FALSE	TRUE	FALSE	TRUE	FALSE	FALSE	FALSE	TRUE	FALSE	FALSE
Kennett_2022_NatComm	CentralAmerica_MH	Belize_4900BP.Capt	darkviolet	21	I7544	FALSE	FALSE	FALSE	FALSE	TRUE	TRUE	TRUE	FALSE	TRUE	FALSE	TRUE	TRUE	FALSE
Kennett_2022_NatComm	CentralAmerica_MH	Belize_4900BP.Capt	darkviolet	21	I3442	FALSE	FALSE	FALSE	FALSE	TRUE	TRUE	TRUE	FALSE	TRUE	FALSE	TRUE	TRUE	FALSE
Kennett_2022_NatComm	CentralAmerica_MH	Belize_5500BP.Capt	darkviolet	25	I13267	FALSE	FALSE	FALSE	FALSE	TRUE	TRUE	TRUE	FALSE	TRUE	FALSE	FALSE	FALSE	FALSE
Kennett_2022_NatComm	CentralAmerica_MH	Belize_7000BP.Capt	mediumvioletred	25	I20428	FALSE	FALSE	FALSE	FALSE	TRUE	FALSE	TRUE	FALSE	FALSE	FALSE	FALSE	FALSE	FALSE
Kennett_2022_NatComm|PosthNakatsuka_2018_Cell	CentralAmerica_EH	Belize_9400BP.Capt	mediumvioletred	21	I3443	FALSE	FALSE	FALSE	FALSE	TRUE	TRUE	TRUE	FALSE	TRUE	FALSE	TRUE	FALSE	FALSE
Kennett_2022_NatComm|PosthNakatsuka_2018_Cell	CentralAmerica_EH	Belize_9400BP.Capt	mediumvioletred	21	I13268	FALSE	FALSE	FALSE	FALSE	TRUE	FALSE	TRUE	FALSE	FALSE	FALSE	TRUE	FALSE	FALSE
Lindo_2018_SciAdv	CentralAndes_MH	Peru_SoroMikayaPatjxa_6800BP.SG	orange2	21	SMP5	FALSE	FALSE	TRUE	TRUE	TRUE	FALSE	TRUE	FALSE	FALSE	FALSE	FALSE	FALSE	FALSE
Lindo_2018_SciAdv	CentralAndes_Unknown	Peru_Kaillachuro_Unknown.SG	darkorange3	3	K1	FALSE	FALSE	TRUE	TRUE	TRUE	TRUE	TRUE	TRUE	TRUE	FALSE	FALSE	FALSE	FALSE
Lindo_2018_SciAdv_SingleEnd	CentralAndes_EarlyIntermediate_LH	Peru_RioUncallane_1600BP.SG	darkorange1	3	IL4	FALSE	FALSE	TRUE	TRUE	TRUE	TRUE	TRUE	TRUE	TRUE	TRUE	TRUE	TRUE	FALSE
Lindo_2018_SciAdv_SingleEnd	CentralAndes_EarlyIntermediate_LH	Peru_RioUncallane_1600BP.SG	darkorange1	3	IL7	FALSE	FALSE	TRUE	TRUE	TRUE	TRUE	TRUE	TRUE	TRUE	TRUE	TRUE	TRUE	FALSE
Lindo_2018_SciAdv_SingleEnd	CentralAndes_EarlyIntermediate_LH	Peru_RioUncallane_1600BP.SG	darkorange1	3	IL3	FALSE	FALSE	TRUE	TRUE	TRUE	TRUE	TRUE	TRUE	TRUE	TRUE	TRUE	TRUE	FALSE
Lindo_2018_SciAdv_SingleEnd	CentralAndes_EarlyIntermediate_LH	Peru_RioUncallane_1600BP.SG	darkorange1	3	IL5	FALSE	FALSE	TRUE	TRUE	TRUE	TRUE	TRUE	TRUE	TRUE	TRUE	TRUE	TRUE	FALSE
Lindo_2018_SciAdv_SingleEnd	CentralAndes_EarlyIntermediate_LH	Peru_RioUncallane_1800BP.SG	darkorange1	4	IL2	FALSE	FALSE	TRUE	TRUE	TRUE	TRUE	TRUE	TRUE	TRUE	FALSE	FALSE	FALSE	FALSE
Lindo_2022_PNASnexus	Uruguay_LH	Uruguay_Rocha_PreColonial.SG	palegreen1	6	CH13	FALSE	FALSE	TRUE	FALSE	FALSE	FALSE	TRUE	FALSE	FALSE	TRUE	FALSE	FALSE	FALSE
Lindo_2022_PNASnexus	Uruguay_LH	Uruguay_Rocha_PreColonial.SG	palegreen1	6	CH19B	FALSE	FALSE	TRUE	TRUE	TRUE	FALSE	TRUE	TRUE	TRUE	TRUE	FALSE	FALSE	FALSE
Luisi_2020_PlosOne	AMBA_Modern	AMBA-Luisi	grey70	21	BA561	FALSE	FALSE	FALSE	FALSE	FALSE	FALSE	FALSE	TRUE	TRUE	FALSE	FALSE	FALSE	FALSE
Luisi_2020_PlosOne	AMBA_Modern	AMBA-Luisi	grey70	21	BA527	FALSE	FALSE	FALSE	FALSE	FALSE	FALSE	FALSE	TRUE	TRUE	FALSE	FALSE	FALSE	FALSE
Luisi_2020_PlosOne	AMBA_Modern	AMBA-Luisi	grey70	21	BA188	FALSE	FALSE	FALSE	FALSE	FALSE	FALSE	FALSE	TRUE	TRUE	FALSE	FALSE	FALSE	FALSE
Luisi_2020_PlosOne	Bariloche_Modern	Bariloche-Luisi	grey55	21	BA7044	FALSE	FALSE	FALSE	FALSE	FALSE	FALSE	FALSE	TRUE	TRUE	FALSE	FALSE	FALSE	FALSE
Luisi_2020_PlosOne	Bariloche_Modern	Bariloche-Luisi	grey55	21	BA7017	FALSE	FALSE	FALSE	FALSE	FALSE	FALSE	FALSE	TRUE	TRUE	FALSE	FALSE	FALSE	FALSE
Luisi_2020_PlosOne	BsAs_Modern	BahiaBlanca-Luisi	grey70	22	BB2076	FALSE	FALSE	FALSE	FALSE	FALSE	FALSE	FALSE	TRUE	TRUE	FALSE	FALSE	FALSE	FALSE
Luisi_2020_PlosOne	BsAs_Modern	BahiaBlanca-Luisi	grey70	22	BB2112	FALSE	FALSE	FALSE	FALSE	FALSE	FALSE	FALSE	TRUE	TRUE	FALSE	FALSE	FALSE	FALSE
Luisi_2020_PlosOne	BsAs_Modern	LaPlata-Luisi	grey70	24	LP1150	FALSE	FALSE	FALSE	FALSE	FALSE	FALSE	FALSE	TRUE	TRUE	FALSE	FALSE	FALSE	FALSE
Luisi_2020_PlosOne	BsAs_Modern	LaPlata-Luisi	grey70	24	LP1181	FALSE	FALSE	FALSE	FALSE	FALSE	FALSE	FALSE	TRUE	TRUE	FALSE	FALSE	FALSE	FALSE
Luisi_2020_PlosOne	BsAs_Modern	LaPlata-Luisi	grey70	24	LP1175	FALSE	FALSE	FALSE	FALSE	FALSE	FALSE	FALSE	TRUE	TRUE	FALSE	FALSE	FALSE	FALSE
Luisi_2020_PlosOne	Catamarca_Modern	Catamarca-Luisi	grey40	21	CAT49	FALSE	FALSE	FALSE	FALSE	FALSE	FALSE	FALSE	TRUE	TRUE	FALSE	FALSE	FALSE	FALSE
Luisi_2020_PlosOne	Chubut_Modern	PuertoMadryn-Luisi	grey55	22	PM2.1	FALSE	FALSE	FALSE	FALSE	FALSE	FALSE	FALSE	TRUE	TRUE	FALSE	FALSE	FALSE	FALSE
Luisi_2020_PlosOne	Chubut_Modern	PuertoMadryn-Luisi	grey55	22	PM4	FALSE	FALSE	FALSE	FALSE	FALSE	FALSE	FALSE	TRUE	TRUE	FALSE	FALSE	FALSE	FALSE
Luisi_2020_PlosOne	Chubut_Modern	PuertoMadryn-Luisi	grey55	22	PM38	FALSE	FALSE	FALSE	FALSE	FALSE	FALSE	FALSE	TRUE	TRUE	FALSE	FALSE	FALSE	FALSE
Luisi_2020_PlosOne	Chubut_Modern	Trelew-Luisi	grey55	23	TR6207	FALSE	FALSE	FALSE	FALSE	FALSE	FALSE	FALSE	TRUE	TRUE	FALSE	FALSE	FALSE	FALSE
Luisi_2020_PlosOne	Cordoba_Modern	Cordoba-Luisi	grey25	22	M3	FALSE	FALSE	FALSE	FALSE	FALSE	FALSE	FALSE	TRUE	TRUE	FALSE	FALSE	FALSE	FALSE
Luisi_2020_PlosOne	Cordoba_Modern	RioCuarto-Luisi	grey25	23	RC57	FALSE	FALSE	FALSE	FALSE	FALSE	FALSE	FALSE	TRUE	TRUE	FALSE	FALSE	FALSE	FALSE
Luisi_2020_PlosOne	Cordoba_Modern	RioCuarto-Luisi	grey25	23	RC2	FALSE	FALSE	FALSE	FALSE	FALSE	FALSE	FALSE	TRUE	TRUE	FALSE	FALSE	FALSE	FALSE
Luisi_2020_PlosOne	Corrientes_Modern	Corrientes-Luisi	grey85	21	CBS89	FALSE	FALSE	FALSE	FALSE	FALSE	FALSE	FALSE	TRUE	TRUE	FALSE	FALSE	FALSE	FALSE
Luisi_2020_PlosOne	EntreRios_Modern	LaPaz-Luisi	grey85	22	LPZ5	FALSE	FALSE	FALSE	FALSE	FALSE	FALSE	FALSE	TRUE	TRUE	FALSE	FALSE	FALSE	FALSE
Luisi_2020_PlosOne	EntreRios_Modern	LaPaz-Luisi	grey85	22	LPZ35	FALSE	FALSE	FALSE	FALSE	FALSE	FALSE	FALSE	TRUE	TRUE	FALSE	FALSE	FALSE	FALSE
Luisi_2020_PlosOne	EntreRios_Modern	LaPaz-Luisi	grey85	22	LPZ56	FALSE	FALSE	FALSE	FALSE	FALSE	FALSE	FALSE	TRUE	TRUE	FALSE	FALSE	FALSE	FALSE
Luisi_2020_PlosOne	EntreRios_Modern	LaPaz-Luisi	grey85	22	LPZ7	FALSE	FALSE	FALSE	FALSE	FALSE	FALSE	FALSE	TRUE	TRUE	FALSE	FALSE	FALSE	FALSE
Luisi_2020_PlosOne	EntreRios_Modern	LaPaz-Luisi	grey85	22	LPZ60	FALSE	FALSE	FALSE	FALSE	FALSE	FALSE	FALSE	TRUE	TRUE	FALSE	FALSE	FALSE	FALSE
Luisi_2020_PlosOne	EntreRios_Modern	LaPaz-Luisi	grey85	22	LPZ49	FALSE	FALSE	FALSE	FALSE	FALSE	FALSE	FALSE	TRUE	TRUE	FALSE	FALSE	FALSE	FALSE
Luisi_2020_PlosOne	EntreRios_Modern	LaPaz-Luisi	grey85	22	LPZ20	FALSE	FALSE	FALSE	FALSE	FALSE	FALSE	FALSE	TRUE	TRUE	FALSE	FALSE	FALSE	FALSE
Luisi_2020_PlosOne	EntreRios_Modern	LaPaz-Luisi	grey85	22	LPZ16	FALSE	FALSE	FALSE	FALSE	FALSE	FALSE	FALSE	TRUE	TRUE	FALSE	FALSE	FALSE	FALSE
Luisi_2020_PlosOne	Formosa_Modern	Formosa-Luisi	grey100	22	FLP203	FALSE	FALSE	FALSE	FALSE	FALSE	FALSE	FALSE	TRUE	TRUE	FALSE	FALSE	FALSE	FALSE
Luisi_2020_PlosOne	Formosa_Modern	Formosa-Luisi	grey100	22	FLP130	FALSE	FALSE	FALSE	FALSE	FALSE	FALSE	FALSE	TRUE	TRUE	FALSE	FALSE	FALSE	FALSE
Luisi_2020_PlosOne	Formosa_Modern	Formosa-Luisi	grey100	22	FOR24	FALSE	FALSE	FALSE	FALSE	FALSE	FALSE	FALSE	TRUE	TRUE	FALSE	FALSE	FALSE	FALSE
Luisi_2020_PlosOne	Formosa_Modern	Formosa-Luisi	grey100	22	FOR59	FALSE	FALSE	FALSE	FALSE	FALSE	FALSE	FALSE	TRUE	TRUE	FALSE	FALSE	FALSE	FALSE
Luisi_2020_PlosOne	Formosa_Modern	Formosa-Luisi	grey100	22	FLP42	FALSE	FALSE	FALSE	FALSE	FALSE	FALSE	FALSE	TRUE	TRUE	FALSE	FALSE	FALSE	FALSE
Luisi_2020_PlosOne	Formosa_Modern	Formosa-Luisi	grey100	22	FOR41	FALSE	FALSE	FALSE	FALSE	FALSE	FALSE	FALSE	TRUE	TRUE	FALSE	FALSE	FALSE	FALSE
Luisi_2020_PlosOne	Jujuy_Modern	SanSalvJujuy-Luisi	grey40	22	J35	FALSE	FALSE	FALSE	FALSE	FALSE	FALSE	FALSE	TRUE	TRUE	FALSE	FALSE	FALSE	FALSE
Luisi_2020_PlosOne	LaRioja_Modern	Chepes-Luisi	grey40	23	CHE13	FALSE	FALSE	FALSE	FALSE	FALSE	FALSE	FALSE	TRUE	TRUE	FALSE	FALSE	FALSE	FALSE
Luisi_2020_PlosOne	LaRioja_Modern	Chepes-Luisi	grey40	23	CHE33	FALSE	FALSE	FALSE	FALSE	FALSE	FALSE	FALSE	TRUE	TRUE	FALSE	FALSE	FALSE	FALSE
Luisi_2020_PlosOne	LaRioja_Modern	Chepes-Luisi	grey40	23	CHE44	FALSE	FALSE	FALSE	FALSE	FALSE	FALSE	FALSE	TRUE	TRUE	FALSE	FALSE	FALSE	FALSE
Luisi_2020_PlosOne	LaRioja_Modern	Chepes-Luisi	grey40	23	CHE28	FALSE	FALSE	FALSE	FALSE	FALSE	FALSE	FALSE	TRUE	TRUE	FALSE	FALSE	FALSE	FALSE
Luisi_2020_PlosOne	LaRioja_Modern	Chepes-Luisi	grey40	23	CHE18	FALSE	FALSE	FALSE	FALSE	FALSE	FALSE	FALSE	TRUE	TRUE	FALSE	FALSE	FALSE	FALSE
Luisi_2020_PlosOne	Misiones_Modern	Posadas-Luisi	grey100	23	MI6	FALSE	FALSE	FALSE	FALSE	FALSE	FALSE	FALSE	TRUE	TRUE	FALSE	FALSE	FALSE	FALSE
Luisi_2020_PlosOne	Salta_Modern	Salta-Luisi	grey40	24	SAL142	FALSE	FALSE	FALSE	FALSE	FALSE	FALSE	FALSE	TRUE	TRUE	FALSE	FALSE	FALSE	FALSE
Luisi_2020_PlosOne	Salta_Modern	Salta-Luisi	grey40	24	SAL111	FALSE	FALSE	FALSE	FALSE	FALSE	FALSE	FALSE	TRUE	TRUE	FALSE	FALSE	FALSE	FALSE
Luisi_2020_PlosOne	Salta_Modern	Salta-Luisi	grey40	24	SAL127	FALSE	FALSE	FALSE	FALSE	FALSE	FALSE	FALSE	TRUE	TRUE	FALSE	FALSE	FALSE	FALSE
Luisi_2020_PlosOne	Salta_Modern	Salta-Luisi	grey40	24	SAL131	FALSE	FALSE	FALSE	FALSE	FALSE	FALSE	FALSE	TRUE	TRUE	FALSE	FALSE	FALSE	FALSE
Luisi_2020_PlosOne	Salta_Modern	Salta-Luisi	grey40	24	SAL149	FALSE	FALSE	FALSE	FALSE	FALSE	FALSE	FALSE	TRUE	TRUE	FALSE	FALSE	FALSE	FALSE
Luisi_2020_PlosOne	Salta_Modern	Salta-Luisi	grey40	24	SAL136	FALSE	FALSE	FALSE	FALSE	FALSE	FALSE	FALSE	TRUE	TRUE	FALSE	FALSE	FALSE	FALSE
Luisi_2020_PlosOne	Salta_Modern	Salta-Luisi	grey40	24	SAL129	FALSE	FALSE	FALSE	FALSE	FALSE	FALSE	FALSE	TRUE	TRUE	FALSE	FALSE	FALSE	FALSE
Luisi_2020_PlosOne	SanJuan_Modern	Calingasta-Luisi	grey10	23	CAL36	FALSE	FALSE	FALSE	FALSE	FALSE	FALSE	FALSE	TRUE	TRUE	FALSE	FALSE	FALSE	FALSE
Luisi_2020_PlosOne	SanJuan_Modern	Calingasta-Luisi	grey10	23	CAL33	FALSE	FALSE	FALSE	FALSE	FALSE	FALSE	FALSE	TRUE	TRUE	FALSE	FALSE	FALSE	FALSE
Luisi_2020_PlosOne	SanJuan_Modern	Calingasta-Luisi	grey10	23	CAL44	FALSE	FALSE	FALSE	FALSE	FALSE	FALSE	FALSE	TRUE	TRUE	FALSE	FALSE	FALSE	FALSE
Luisi_2020_PlosOne	SanJuan_Modern	Calingasta-Luisi	grey10	23	CAL21	FALSE	FALSE	FALSE	FALSE	FALSE	FALSE	FALSE	TRUE	TRUE	FALSE	FALSE	FALSE	FALSE
Luisi_2020_PlosOne	SanJuan_Modern	Calingasta-Luisi	grey10	23	CAL27	FALSE	FALSE	FALSE	FALSE	FALSE	FALSE	FALSE	TRUE	TRUE	FALSE	FALSE	FALSE	FALSE
Luisi_2020_PlosOne	SanJuan_Modern	Calingasta-Luisi	grey10	23	CAL55	FALSE	FALSE	FALSE	FALSE	FALSE	FALSE	FALSE	TRUE	TRUE	FALSE	FALSE	FALSE	FALSE
Luisi_2020_PlosOne	SanJuan_Modern	Calingasta-Luisi	grey10	23	CAL29	FALSE	FALSE	FALSE	FALSE	FALSE	FALSE	FALSE	TRUE	TRUE	FALSE	FALSE	FALSE	FALSE
Luisi_2020_PlosOne	SanJuan_Modern	Calingasta-Luisi	grey10	23	CAL5	FALSE	FALSE	FALSE	FALSE	FALSE	FALSE	FALSE	TRUE	TRUE	FALSE	FALSE	FALSE	FALSE
Luisi_2020_PlosOne	SanLuis_Modern	Tilisarao-Luisi	grey25	25	TIL24	FALSE	FALSE	FALSE	FALSE	FALSE	FALSE	FALSE	TRUE	TRUE	FALSE	FALSE	FALSE	FALSE
Luisi_2020_PlosOne	TierraDelFuego_Modern	RioGrande-Luisi	grey55	24	SLK7	FALSE	FALSE	FALSE	FALSE	FALSE	FALSE	FALSE	TRUE	TRUE	FALSE	FALSE	FALSE	FALSE
Luisi_2020_PlosOne	TierraDelFuego_Modern	RioGrande-Luisi	grey55	24	RGD5	FALSE	FALSE	FALSE	FALSE	FALSE	FALSE	FALSE	TRUE	TRUE	FALSE	FALSE	FALSE	FALSE
Luisi_2020_PlosOne	Tucuman_Modern	SanMigTucuman-Luisi	grey40	25	TMN60	FALSE	FALSE	FALSE	FALSE	FALSE	FALSE	FALSE	TRUE	TRUE	FALSE	FALSE	FALSE	FALSE
Luisi_2020_PlosOne	Tucuman_Modern	SanMigTucuman-Luisi	grey40	25	TMN67	FALSE	FALSE	FALSE	FALSE	FALSE	FALSE	FALSE	TRUE	TRUE	FALSE	FALSE	FALSE	FALSE
Luisi_2020_PlosOne	Tucuman_Modern	SanMigTucuman-Luisi	grey40	25	TMN112	FALSE	FALSE	FALSE	FALSE	FALSE	FALSE	FALSE	TRUE	TRUE	FALSE	FALSE	FALSE	FALSE
Luisi_2020_PlosOne	Tucuman_Modern	SanMigTucuman-Luisi	grey40	25	TMN146	FALSE	FALSE	FALSE	FALSE	FALSE	FALSE	FALSE	TRUE	TRUE	FALSE	FALSE	FALSE	FALSE
Luisi_2020_PlosOne	Tucuman_Modern	SanMigTucuman-Luisi	grey40	25	TMN4	FALSE	FALSE	FALSE	FALSE	FALSE	FALSE	FALSE	TRUE	TRUE	FALSE	FALSE	FALSE	FALSE
Luisi_2020_PlosOne	Tucuman_Modern	SanMigTucuman-Luisi	grey40	25	TMN48	FALSE	FALSE	FALSE	FALSE	FALSE	FALSE	FALSE	TRUE	TRUE	FALSE	FALSE	FALSE	FALSE
Luisi_2020_PlosOne	Tucuman_Modern	SanMigTucuman-Luisi	grey40	25	TMN79	FALSE	FALSE	FALSE	FALSE	FALSE	FALSE	FALSE	TRUE	TRUE	FALSE	FALSE	FALSE	FALSE
Luisi_2020_PlosOne	Tucuman_Modern	SanMigTucuman-Luisi	grey40	25	TMN105	FALSE	FALSE	FALSE	FALSE	FALSE	FALSE	FALSE	TRUE	TRUE	FALSE	FALSE	FALSE	FALSE
MorenoMayar_2018_Science	Brazil_EH	Brazil_Sumidouro_10100BP.SG	palegreen1	22	Sumidouro4	FALSE	FALSE	TRUE	TRUE	TRUE	TRUE	TRUE	TRUE	TRUE	TRUE	TRUE	TRUE	FALSE
MorenoMayar_2018_Science	Brazil_EH	Brazil_Sumidouro_10100BP.SG	palegreen1	22	Sumidouro6	FALSE	FALSE	TRUE	TRUE	TRUE	TRUE	TRUE	TRUE	TRUE	TRUE	TRUE	TRUE	FALSE
MorenoMayar_2018_Science	Brazil_EH	Brazil_Sumidouro_10100BP.SG	palegreen1	22	Sumidouro7	FALSE	FALSE	TRUE	TRUE	TRUE	TRUE	TRUE	TRUE	TRUE	TRUE	TRUE	FALSE	FALSE
MorenoMayar_2018_Science	Brazil_EH	Brazil_Sumidouro_10400BP.SG	palegreen1	22	Sumidouro5	FALSE	FALSE	TRUE	TRUE	TRUE	TRUE	TRUE	TRUE	TRUE	FALSE	FALSE	TRUE	FALSE
MorenoMayar_2018_Science	Brazil_EH	Brazil_Sumidouro_9800BP.SG	palegreen1	22	Sumidouro8	FALSE	FALSE	TRUE	TRUE	TRUE	FALSE	TRUE	FALSE	FALSE	FALSE	FALSE	FALSE	FALSE
MorenoMayar_2018_Science	QhapaqHucha_Inka_LH	Argentina_Aconcagua_Inca_500BP.SG	brown3	9	Aconcagua	FALSE	FALSE	TRUE	TRUE	TRUE	TRUE	TRUE	TRUE	TRUE	FALSE	FALSE	FALSE	FALSE
MorenoMayar_2018_Science	SouthernNorthAmerica_EH	USA_Nevada_SpiritCave_11000BP.SG	blueviolet	22	AHUR770c	FALSE	FALSE	TRUE	TRUE	TRUE	FALSE	TRUE	FALSE	FALSE	FALSE	FALSE	FALSE	FALSE
MorenoMayar_2018_Science	SouthernNorthAmerica_EH	USA_Nevada_SpiritCave_11000BP.SG	blueviolet	22	AHUR_2064	FALSE	FALSE	TRUE	TRUE	TRUE	TRUE	TRUE	FALSE	TRUE	FALSE	FALSE	FALSE	FALSE
MorenoMayar_2018_Science	SouthernNorthAmerica_LH	USA_Nevada_LovelockCave_1850BP.SG	blueviolet	1	Lovelock2	FALSE	FALSE	TRUE	TRUE	TRUE	TRUE	TRUE	FALSE	TRUE	FALSE	FALSE	FALSE	FALSE
MorenoMayar_2018_Science	SouthernNorthAmerica_LH	USA_Nevada_LovelockCave_1850BP.SG	blueviolet	1	Lovelock1	FALSE	FALSE	TRUE	TRUE	TRUE	TRUE	TRUE	FALSE	TRUE	FALSE	FALSE	FALSE	FALSE
MorenoMayar_2018_Science	SouthernNorthAmerica_LH	USA_Nevada_LovelockCave_1850BP.SG	blueviolet	1	Lovelock4	FALSE	FALSE	TRUE	TRUE	TRUE	TRUE	TRUE	FALSE	TRUE	FALSE	FALSE	FALSE	FALSE
MorenoMayar_2018_Science	SouthernNorthAmerica_LH	USA_Nevada_LovelockCave_600BP.SG	blueviolet	2	Lovelock3	FALSE	FALSE	TRUE	TRUE	TRUE	TRUE	TRUE	FALSE	TRUE	FALSE	FALSE	FALSE	FALSE
MorenoMayar_2018_Science	SouthPatagonia_MH	Chile_PuntaSantaAna_7300BP.SG	blue3	22	SA5832	FALSE	FALSE	TRUE	TRUE	TRUE	TRUE	TRUE	TRUE	TRUE	FALSE	FALSE	TRUE	FALSE
MorenoMayar_2018_Science	SouthPatagonia_MH	Chile_WesternArchipelago_Ayayema_5100BP.SG	blue3	23	A460	FALSE	FALSE	TRUE	TRUE	TRUE	TRUE	TRUE	TRUE	TRUE	FALSE	FALSE	FALSE	FALSE
Nakatsuka_2020_Cell	CentralAndes_EarlyIntermediate_LH	Peru_EIP_Moche.Capt	darkorange1	6	I2262	FALSE	FALSE	FALSE	FALSE	TRUE	FALSE	TRUE	FALSE	FALSE	FALSE	TRUE	FALSE	FALSE
Nakatsuka_2020_Cell	CentralAndes_EarlyIntermediate_LH	Peru_EIP_Moche.Capt	darkorange1	6	I2238	FALSE	FALSE	FALSE	FALSE	TRUE	FALSE	TRUE	FALSE	FALSE	FALSE	TRUE	FALSE	FALSE
Nakatsuka_2020_Cell	CentralAndes_EarlyIntermediate_LH	Peru_ElBrujo_EIP_1300BP.Capt	darkorange1	1	I2237	FALSE	FALSE	FALSE	FALSE	TRUE	TRUE	TRUE	TRUE	TRUE	FALSE	TRUE	FALSE	FALSE
Nakatsuka_2020_Cell	CentralAndes_EarlyIntermediate_LH	Peru_ElBrujo_EIP_1300BP.Capt	darkorange1	1	I2263	FALSE	FALSE	FALSE	FALSE	TRUE	TRUE	TRUE	TRUE	TRUE	FALSE	TRUE	FALSE	FALSE
Nakatsuka_2020_Cell	CentralAndes_EarlyIntermediate_LH	Peru_Lima_EIP_1450BP.Capt	darkorange1	2	I0045	FALSE	FALSE	FALSE	FALSE	TRUE	FALSE	TRUE	TRUE	TRUE	FALSE	FALSE	FALSE	FALSE
Nakatsuka_2020_Cell	CentralAndes_EarlyIntermediate_LH	Peru_Ullujaya_EIP_1350BP.Capt	darkorange1	5	I2557	FALSE	FALSE	FALSE	FALSE	TRUE	TRUE	TRUE	TRUE	TRUE	FALSE	TRUE	FALSE	FALSE
Nakatsuka_2020_Cell	CentralAndes_EarlyIntermediate_LH	Peru_Ullujaya_EIP_1350BP.Capt	darkorange1	5	I2558	FALSE	FALSE	FALSE	FALSE	TRUE	TRUE	TRUE	TRUE	TRUE	FALSE	TRUE	FALSE	FALSE
Nakatsuka_2020_Cell	CentralAndes_LateHorizon_LH	Peru_LH_Inca.Capt	darkorange2	1	I2545	FALSE	FALSE	FALSE	FALSE	TRUE	FALSE	TRUE	TRUE	TRUE	FALSE	FALSE	FALSE	FALSE
Nakatsuka_2020_Cell	CentralAndes_LateHorizon_LH	Peru_SanSebastian_LH_500BP.Capt	darkorange2	2	I1743	FALSE	FALSE	FALSE	FALSE	TRUE	TRUE	TRUE	TRUE	TRUE	FALSE	FALSE	FALSE	FALSE
Nakatsuka_2020_Cell	CentralAndes_LateIntermediate_LH	Chile_LIP_Pukara_600BP.Capt	orange1	1	I17497	FALSE	FALSE	FALSE	FALSE	TRUE	FALSE	TRUE	TRUE	TRUE	FALSE	FALSE	FALSE	FALSE
Nakatsuka_2020_Cell	CentralAndes_LateIntermediate_LH	Chile_LIP_Pukara_700BP.Capt	orange1	2	I14009	FALSE	FALSE	FALSE	FALSE	TRUE	FALSE	TRUE	TRUE	TRUE	FALSE	FALSE	FALSE	FALSE
Nakatsuka_2020_Cell	CentralAndes_LateIntermediate_LH	Peru_Chanka_LIP.Capt	orange1	4	I2544	FALSE	FALSE	FALSE	FALSE	TRUE	TRUE	TRUE	TRUE	TRUE	FALSE	TRUE	TRUE	FALSE
Nakatsuka_2020_Cell	CentralAndes_LateIntermediate_LH	Peru_Chanka_LIP.Capt	orange1	4	I2236	FALSE	FALSE	FALSE	FALSE	TRUE	FALSE	TRUE	TRUE	TRUE	FALSE	TRUE	FALSE	FALSE
Nakatsuka_2020_Cell	CentralAndes_LateIntermediate_LH	Peru_Highlands_LIP_Chimu.Capt	orange1	5	I2251	FALSE	FALSE	FALSE	FALSE	TRUE	TRUE	TRUE	TRUE	TRUE	FALSE	TRUE	FALSE	FALSE
Nakatsuka_2020_Cell	CentralAndes_LateIntermediate_LH	Peru_Highlands_LIP_Chimu.Capt	orange1	5	I2264	FALSE	FALSE	FALSE	FALSE	TRUE	TRUE	TRUE	TRUE	TRUE	FALSE	TRUE	FALSE	FALSE
Nakatsuka_2020_Cell	CentralAndes_LateIntermediate_LH	Peru_Highlands_LIP_Chimu.Capt	orange1	5	I2250	FALSE	FALSE	FALSE	FALSE	TRUE	FALSE	TRUE	TRUE	TRUE	FALSE	TRUE	FALSE	FALSE
Nakatsuka_2020_Cell	CentralAndes_LateIntermediate_LH	Peru_Lima_LIP_650BP.Capt	orange1	6	I0964	FALSE	FALSE	FALSE	FALSE	TRUE	FALSE	TRUE	FALSE	FALSE	FALSE	TRUE	FALSE	FALSE
Nakatsuka_2020_Cell	CentralAndes_LateIntermediate_LH	Peru_Lima_LIP_650BP.Capt	orange1	6	I0044	FALSE	FALSE	FALSE	FALSE	TRUE	TRUE	TRUE	TRUE	TRUE	FALSE	TRUE	FALSE	FALSE
Nakatsuka_2020_Cell	CentralAndes_LateIntermediate_LH	Peru_Lima_LIP_650BP.Capt	orange1	6	I0965	FALSE	FALSE	FALSE	FALSE	TRUE	FALSE	TRUE	TRUE	TRUE	FALSE	TRUE	FALSE	FALSE
Nakatsuka_2020_Cell	CentralAndes_LateIntermediate_LH	Peru_Lima_LIP_650BP.Capt	orange1	6	I0969	FALSE	FALSE	FALSE	FALSE	TRUE	FALSE	TRUE	FALSE	FALSE	FALSE	TRUE	FALSE	FALSE
Nakatsuka_2020_Cell	CentralAndes_LateIntermediate_LH	Peru_LIP_Botigiriayocc_600BP.Capt	orange1	7	I0042	FALSE	FALSE	FALSE	FALSE	TRUE	TRUE	TRUE	TRUE	TRUE	FALSE	FALSE	FALSE	FALSE
Nakatsuka_2020_Cell	CentralAndes_LateIntermediate_LH	Peru_LIP_Pacapaccari_600BP.Capt	orange1	8	I1358	FALSE	FALSE	FALSE	FALSE	TRUE	TRUE	TRUE	TRUE	TRUE	FALSE	TRUE	TRUE	FALSE
Nakatsuka_2020_Cell	CentralAndes_LateIntermediate_LH	Peru_LIP_Pacapaccari_600BP.Capt	orange1	8	I1396	FALSE	FALSE	FALSE	FALSE	TRUE	FALSE	TRUE	FALSE	FALSE	FALSE	TRUE	FALSE	FALSE
Nakatsuka_2020_Cell	CentralAndes_LateIntermediate_LH	Peru_LIP_Pacapaccari_600BP.Capt	orange1	8	I1356	FALSE	FALSE	FALSE	FALSE	TRUE	TRUE	TRUE	TRUE	TRUE	FALSE	TRUE	TRUE	FALSE
Nakatsuka_2020_Cell	CentralAndes_LateIntermediate_LH	Peru_LIP_Ychsma.Capt	orange1	9	I0966	FALSE	FALSE	FALSE	FALSE	TRUE	FALSE	TRUE	TRUE	TRUE	FALSE	TRUE	FALSE	FALSE
Nakatsuka_2020_Cell	CentralAndes_LateIntermediate_LH	Peru_LIP_Ychsma.Capt	orange1	9	I0967	FALSE	FALSE	FALSE	FALSE	TRUE	FALSE	TRUE	TRUE	TRUE	FALSE	TRUE	FALSE	FALSE
Nakatsuka_2020_Cell	CentralAndes_LateIntermediate_LH	Peru_Palpa_LIP_550BP.Capt	orange1	10	I2549	FALSE	FALSE	FALSE	FALSE	TRUE	TRUE	TRUE	TRUE	TRUE	FALSE	TRUE	FALSE	FALSE
Nakatsuka_2020_Cell	CentralAndes_LateIntermediate_LH	Peru_Palpa_LIP_550BP.Capt	orange1	10	I1479	FALSE	FALSE	FALSE	FALSE	TRUE	TRUE	TRUE	TRUE	TRUE	FALSE	TRUE	FALSE	FALSE
Nakatsuka_2020_Cell	CentralAndes_LateIntermediate_LH	Peru_SanSebastian_LIP_600BP.Capt	orange1	11	I1400	FALSE	FALSE	FALSE	FALSE	FALSE	FALSE	TRUE	FALSE	FALSE	FALSE	FALSE	FALSE	FALSE
Nakatsuka_2020_Cell	CentralAndes_LateIntermediate_LH	Peru_SanSebastian_LIP_600BP.Capt	orange1	11	I1744	FALSE	FALSE	FALSE	FALSE	TRUE	TRUE	TRUE	TRUE	TRUE	FALSE	FALSE	FALSE	FALSE
Nakatsuka_2020_Cell	CentralAndes_LateIntermediate_LH	Peru_Torontoy_500BP.Capt	orange1	12	TOY-7A-1	FALSE	FALSE	FALSE	FALSE	TRUE	TRUE	TRUE	TRUE	TRUE	FALSE	TRUE	FALSE	FALSE
Nakatsuka_2020_Cell	CentralAndes_LateIntermediate_LH	Peru_Torontoy_500BP.Capt	orange1	12	TOY-4-5	FALSE	FALSE	FALSE	FALSE	TRUE	TRUE	TRUE	TRUE	TRUE	FALSE	TRUE	FALSE	FALSE
Nakatsuka_2020_Cell	CentralAndes_LateIntermediate_LH	Peru_Torontoy_500BP.Capt	orange1	12	TOY-1-1	FALSE	FALSE	FALSE	FALSE	TRUE	TRUE	TRUE	TRUE	TRUE	FALSE	TRUE	FALSE	FALSE
Nakatsuka_2020_Cell	CentralAndes_MiddleHorizon_LH	Bolivia_MH_Iroco_1050BP.Capt	orange2	1	IO2	FALSE	FALSE	FALSE	FALSE	TRUE	TRUE	TRUE	TRUE	TRUE	FALSE	FALSE	TRUE	FALSE
Nakatsuka_2020_Cell	CentralAndes_MiddleHorizon_LH	Bolivia_MH_Miraflores.Capt	orange2	2	MIS3	FALSE	FALSE	FALSE	FALSE	TRUE	TRUE	TRUE	TRUE	TRUE	FALSE	TRUE	FALSE	FALSE
Nakatsuka_2020_Cell	CentralAndes_MiddleHorizon_LH	Bolivia_MH_Miraflores.Capt	orange2	2	MIS5	FALSE	FALSE	FALSE	FALSE	TRUE	TRUE	TRUE	TRUE	TRUE	FALSE	TRUE	FALSE	FALSE
Nakatsuka_2020_Cell	CentralAndes_MiddleHorizon_LH	Bolivia_MH_Tiwanaku.Capt	orange2	3	I0978	FALSE	FALSE	FALSE	FALSE	TRUE	FALSE	TRUE	TRUE	TRUE	FALSE	TRUE	FALSE	FALSE
Nakatsuka_2020_Cell	CentralAndes_MiddleHorizon_LH	Bolivia_MH_Tiwanaku.Capt	orange2	3	I0977	FALSE	FALSE	FALSE	FALSE	TRUE	FALSE	TRUE	FALSE	FALSE	FALSE	TRUE	FALSE	FALSE
Nakatsuka_2020_Cell	CentralAndes_MiddleHorizon_LH	Bolivia_MH_Tiwanaku.Capt	orange2	3	I0976	FALSE	FALSE	FALSE	FALSE	TRUE	FALSE	TRUE	FALSE	FALSE	FALSE	TRUE	FALSE	FALSE
Nakatsuka_2020_Cell	CentralAndes_MiddleHorizon_LH	Bolivia_MiraFlores_MH.Capt	orange2	4	MIS7	FALSE	FALSE	FALSE	FALSE	TRUE	TRUE	TRUE	TRUE	TRUE	FALSE	TRUE	FALSE	FALSE
Nakatsuka_2020_Cell	CentralAndes_MiddleHorizon_LH	Bolivia_MiraFlores_MH.Capt	orange2	4	MIS6	FALSE	FALSE	FALSE	FALSE	TRUE	FALSE	TRUE	FALSE	FALSE	FALSE	TRUE	FALSE	FALSE
Nakatsuka_2020_Cell	CentralAndes_MiddleHorizon_LH	Chile_CaletaHuelen_MH_1100BP.Capt	orange2	5	I2538	FALSE	FALSE	FALSE	FALSE	TRUE	FALSE	TRUE	FALSE	FALSE	FALSE	TRUE	FALSE	FALSE
Nakatsuka_2020_Cell	CentralAndes_MiddleHorizon_LH	Chile_CaletaHuelen_MH_1100BP.Capt	orange2	5	I2539	FALSE	FALSE	FALSE	FALSE	TRUE	FALSE	TRUE	FALSE	FALSE	FALSE	TRUE	FALSE	FALSE
Nakatsuka_2020_Cell	CentralAndes_MiddleHorizon_LH	Chile_CaletaHuelen_MH_1100BP.Capt	orange2	5	I2540	FALSE	FALSE	FALSE	FALSE	TRUE	TRUE	TRUE	TRUE	TRUE	FALSE	TRUE	FALSE	FALSE
Nakatsuka_2020_Cell	CentralAndes_MiddleHorizon_LH	Peru_Highlands_Chinchawas_MH.Capt	orange2	7	I2252	FALSE	FALSE	FALSE	FALSE	TRUE	TRUE	TRUE	TRUE	TRUE	FALSE	FALSE	FALSE	FALSE
Nakatsuka_2020_Cell	CentralAndes_MiddleHorizon_LH	Peru_LimaCoast_MH_1000BP.Capt	orange2	10	I0968	FALSE	FALSE	FALSE	FALSE	TRUE	FALSE	TRUE	FALSE	FALSE	FALSE	FALSE	FALSE	FALSE
Nakatsuka_2020_Cell	CentralAndes_MiddleHorizon_LH	Peru_Ullujaya_MH_950BP.Capt	orange2	9	I2560	FALSE	FALSE	FALSE	FALSE	TRUE	TRUE	TRUE	TRUE	TRUE	FALSE	FALSE	FALSE	FALSE
Nakatsuka_2020_Cell	CentralAndes_MiddleHorizonLateIntermeditae_LH	Peru_MH_LIP_ElBrujo_850BP.Capt	darkorange3	1	I2242	FALSE	FALSE	FALSE	FALSE	TRUE	TRUE	TRUE	TRUE	TRUE	FALSE	FALSE	FALSE	FALSE
Nakatsuka_2020_Cell	CentralAndes_MiddleHorizonLateIntermeditae_LH	Peru_MH_LIP_Lambayeque.Capt	darkorange3	2	I2243	FALSE	FALSE	FALSE	FALSE	TRUE	FALSE	TRUE	FALSE	FALSE	FALSE	TRUE	FALSE	FALSE
Nakatsuka_2020_Cell	CentralAndes_MiddleHorizonLateIntermeditae_LH	Peru_MH_LIP_Lambayeque.Capt	darkorange3	2	I2244	FALSE	FALSE	FALSE	FALSE	TRUE	TRUE	TRUE	TRUE	TRUE	FALSE	TRUE	FALSE	FALSE
Nakatsuka_2020_Cell	CentralAndes_MiddleHorizonLateIntermeditae_LH	Peru_MH_LIP_Lambayeque.Capt	darkorange3	2	I2241	FALSE	FALSE	FALSE	FALSE	TRUE	TRUE	TRUE	TRUE	TRUE	FALSE	TRUE	FALSE	FALSE
Nakatsuka_2020_Cell	Pampa_LH	Argentina_LagunaChica_1600BP.Capt	lightblue	1	I8351	FALSE	FALSE	FALSE	FALSE	TRUE	TRUE	TRUE	TRUE	TRUE	FALSE	FALSE	FALSE	FALSE
Nakatsuka_2023_Nature	California_Central_LH	USA_CA_CalaverasCounty_1500BP.Capt	palevioletred1	8	I15170	FALSE	FALSE	FALSE	FALSE	TRUE	TRUE	TRUE	FALSE	TRUE	FALSE	FALSE	TRUE	FALSE
Nakatsuka_2023_Nature	California_Central_LH	USA_CA_CalaverasCounty_600BP.Capt	palevioletred1	7	I15172	FALSE	FALSE	FALSE	FALSE	TRUE	FALSE	TRUE	FALSE	FALSE	FALSE	TRUE	FALSE	FALSE
Nakatsuka_2023_Nature	California_Central_LH	USA_CA_CalaverasCounty_600BP.Capt	palevioletred1	7	I15174	FALSE	FALSE	FALSE	FALSE	TRUE	TRUE	TRUE	FALSE	TRUE	FALSE	TRUE	TRUE	FALSE
Nakatsuka_2023_Nature	California_Central_LH	USA_CA_CalaverasCounty_600BP.Capt	palevioletred1	7	I15175	FALSE	FALSE	FALSE	FALSE	TRUE	TRUE	TRUE	FALSE	TRUE	FALSE	TRUE	TRUE	FALSE
Nakatsuka_2023_Nature	California_Central_LH	USA_CA_CalaverasCounty_600BP.Capt	palevioletred1	7	I15176	FALSE	FALSE	FALSE	FALSE	TRUE	TRUE	TRUE	FALSE	TRUE	FALSE	TRUE	TRUE	FALSE
Nakatsuka_2023_Nature	California_Central_LH	USA_CA_CalaverasCounty_600BP.Capt	palevioletred1	7	I15173	FALSE	FALSE	FALSE	FALSE	TRUE	TRUE	TRUE	FALSE	TRUE	FALSE	TRUE	TRUE	FALSE
Nakatsuka_2023_Nature	California_Central_LH	USA_CA_Carmel_600BP.Capt	palevioletred1	6	I11260	FALSE	FALSE	FALSE	FALSE	TRUE	TRUE	TRUE	FALSE	TRUE	FALSE	TRUE	TRUE	FALSE
Nakatsuka_2023_Nature	California_Central_LH	USA_CA_Carmel_600BP.Capt	palevioletred1	6	I11551	FALSE	FALSE	FALSE	FALSE	TRUE	FALSE	TRUE	FALSE	TRUE	FALSE	TRUE	FALSE	FALSE
Nakatsuka_2023_Nature	California_NorthernChannelIslands_LH	USA_CA_SantaRosa_3000BP.Capt	violet	3	I2708	FALSE	FALSE	FALSE	FALSE	TRUE	FALSE	TRUE	FALSE	TRUE	FALSE	TRUE	FALSE	FALSE
Nakatsuka_2023_Nature	California_NorthernChannelIslands_LH	USA_CA_SantaRosa_3000BP.Capt	violet	3	I3564	FALSE	FALSE	FALSE	FALSE	TRUE	TRUE	TRUE	FALSE	TRUE	FALSE	TRUE	TRUE	FALSE
Nakatsuka_2023_Nature	California_NorthernChannelIslands_LH	USA_CA_SantaRosa_3000BP.Capt	violet	3	I3565	FALSE	FALSE	FALSE	FALSE	TRUE	TRUE	TRUE	FALSE	TRUE	FALSE	TRUE	FALSE	FALSE
Nakatsuka_2023_Nature	California_NorthernChannelIslands_LH	USA_CA_SantaRosa_300BP.Capt	violet	4	I2703	FALSE	FALSE	FALSE	FALSE	TRUE	TRUE	TRUE	FALSE	TRUE	FALSE	TRUE	TRUE	FALSE
Nakatsuka_2023_Nature	California_NorthernChannelIslands_LH	USA_CA_SantaRosa_300BP.Capt	violet	4	I2707	FALSE	FALSE	FALSE	FALSE	TRUE	TRUE	TRUE	FALSE	TRUE	FALSE	TRUE	TRUE	FALSE
Nakatsuka_2023_Nature	California_NorthernChannelIslands_LH	USA_CA_SantaRosa_300BP.Capt	violet	4	I2704	FALSE	FALSE	FALSE	FALSE	TRUE	TRUE	TRUE	FALSE	TRUE	FALSE	TRUE	TRUE	FALSE
Nakatsuka_2023_Nature	California_NorthernChannelIslands_LH	USA_CA_SantaRosa_300BP.Capt	violet	4	I2706	FALSE	FALSE	FALSE	FALSE	TRUE	TRUE	TRUE	FALSE	TRUE	FALSE	TRUE	FALSE	FALSE
Nakatsuka_2023_Nature	California_NorthernChannelIslands_LH	USA_CA_SantaRosa_300BP.Capt	violet	4	I11967	FALSE	FALSE	FALSE	FALSE	TRUE	TRUE	TRUE	FALSE	TRUE	FALSE	TRUE	TRUE	FALSE
Nakatsuka_2023_Nature	California_NorthernChannelIslands_LH	USA_CA_SantaRosa_300BP.Capt	violet	4	I2705	FALSE	FALSE	FALSE	FALSE	TRUE	TRUE	TRUE	FALSE	TRUE	FALSE	TRUE	TRUE	FALSE
Nakatsuka_2023_Nature	California_NorthernChannelIslands_LH	USA_CA_SantaRosa_3200BP.Capt	violet	5	I11968	FALSE	FALSE	FALSE	FALSE	TRUE	TRUE	TRUE	FALSE	TRUE	FALSE	TRUE	FALSE	FALSE
Nakatsuka_2023_Nature	California_NorthernChannelIslands_LH	USA_CA_SantaRosa_3200BP.Capt	violet	5	I11969	FALSE	FALSE	FALSE	FALSE	TRUE	TRUE	TRUE	FALSE	TRUE	FALSE	TRUE	FALSE	FALSE
Nakatsuka_2023_Nature	California_NorthernChannelIslands_MH	USA_CA_SantaRosa_4900BP.Capt	violet	22	I2709	FALSE	FALSE	FALSE	FALSE	TRUE	TRUE	TRUE	FALSE	TRUE	FALSE	FALSE	FALSE	FALSE
Nakatsuka_2023_Nature	California_NorthernChannelIslands_MH	USA_CA_SantaRosa_7400BP.Capt	violet	21	I11558	FALSE	FALSE	FALSE	FALSE	TRUE	TRUE	TRUE	FALSE	TRUE	FALSE	TRUE	TRUE	FALSE
Nakatsuka_2023_Nature	California_NorthernChannelIslands_MH	USA_CA_SantaRosa_7400BP.Capt	violet	21	I11557	FALSE	FALSE	FALSE	FALSE	TRUE	TRUE	TRUE	FALSE	TRUE	FALSE	TRUE	FALSE	FALSE
Nakatsuka_2023_Nature	California_NorthernChannelIslands_MH	USA_CA_SantaRosa_7400BP.Capt	violet	21	I2711	FALSE	FALSE	FALSE	FALSE	TRUE	TRUE	TRUE	FALSE	TRUE	FALSE	TRUE	FALSE	FALSE
Nakatsuka_2023_Nature	California_NorthernChannelIslands_MH	USA_CA_SantaRosa_7400BP.Capt	violet	21	I2710	FALSE	FALSE	FALSE	FALSE	TRUE	FALSE	TRUE	FALSE	TRUE	FALSE	TRUE	FALSE	FALSE
Nakatsuka_2023_Nature	California_SouthernChannelIslands_LH	USA_CA_SanClemente_500BP.Capt	violet	9	I0751	FALSE	FALSE	FALSE	FALSE	TRUE	TRUE	TRUE	FALSE	TRUE	FALSE	TRUE	TRUE	FALSE
Nakatsuka_2023_Nature	California_SouthernChannelIslands_LH	USA_CA_SanClemente_500BP.Capt	violet	9	I0758	FALSE	FALSE	FALSE	FALSE	TRUE	TRUE	TRUE	FALSE	TRUE	FALSE	TRUE	FALSE	FALSE
Nakatsuka_2023_Nature	California_SouthernChannelIslands_LH	USA_CA_SanClemente_500BP.Capt	violet	9	I0756	FALSE	FALSE	FALSE	FALSE	TRUE	TRUE	TRUE	FALSE	TRUE	FALSE	TRUE	TRUE	FALSE
Nakatsuka_2023_Nature	California_SouthernChannelIslands_LH	USA_CA_SanClemente_500BP.Capt	violet	9	I0755	FALSE	FALSE	FALSE	FALSE	TRUE	TRUE	TRUE	FALSE	TRUE	FALSE	TRUE	TRUE	FALSE
Nakatsuka_2023_Nature	California_SouthernChannelIslands_LH	USA_CA_SanClemente_500BP.Capt	violet	9	I0748	FALSE	FALSE	FALSE	FALSE	TRUE	TRUE	TRUE	FALSE	TRUE	FALSE	TRUE	FALSE	FALSE
Nakatsuka_2023_Nature	California_SouthernChannelIslands_LH	USA_CA_SanClemente_500BP.Capt	violet	9	I0760	FALSE	FALSE	FALSE	FALSE	TRUE	TRUE	TRUE	FALSE	TRUE	FALSE	TRUE	TRUE	FALSE
Nakatsuka_2023_Nature	California_SouthernChannelIslands_LH	USA_CA_SanClemente_500BP.Capt	violet	9	I0752	FALSE	FALSE	FALSE	FALSE	TRUE	FALSE	TRUE	FALSE	TRUE	FALSE	TRUE	FALSE	FALSE
Nakatsuka_2023_Nature	California_SouthernChannelIslands_LH	USA_CA_SanClemente_500BP.Capt	violet	9	I0750	FALSE	FALSE	FALSE	FALSE	TRUE	TRUE	TRUE	FALSE	TRUE	FALSE	TRUE	TRUE	FALSE
Nakatsuka_2023_Nature	California_SouthernMainland_LH	USA_CA_Goleta_2600BP.Capt	palevioletred3	7	I11296	FALSE	FALSE	FALSE	FALSE	TRUE	TRUE	TRUE	FALSE	TRUE	FALSE	FALSE	FALSE	FALSE
Nakatsuka_2023_Nature	California_SouthernMainland_LH	USA_CA_Goleta_400BP.Capt	palevioletred3	6	I11295	FALSE	FALSE	FALSE	FALSE	TRUE	TRUE	TRUE	FALSE	TRUE	FALSE	FALSE	TRUE	FALSE
Nakatsuka_2023_Nature	California_SouthernMainland_LH	USA_CA_Goleta_900BP.Capt	palevioletred3	5	I21250	FALSE	FALSE	FALSE	FALSE	TRUE	TRUE	TRUE	FALSE	TRUE	FALSE	TRUE	TRUE	FALSE
Nakatsuka_2023_Nature	California_SouthernMainland_LH	USA_CA_Goleta_900BP.Capt	palevioletred3	5	I21452	FALSE	FALSE	FALSE	FALSE	TRUE	TRUE	TRUE	FALSE	TRUE	FALSE	TRUE	TRUE	FALSE
Nakatsuka_2023_Nature	California_SouthernMainland_LH	USA_CA_LakeCachuma_400BP.Capt	palevioletred3	4	I11285	FALSE	FALSE	FALSE	FALSE	TRUE	TRUE	TRUE	FALSE	TRUE	FALSE	FALSE	FALSE	FALSE
Nakatsuka_2023_Nature	California_SouthernMainland_LH	USA_CA_Malibu_3400BP.Capt	palevioletred3	3	I14826	FALSE	FALSE	FALSE	FALSE	TRUE	FALSE	TRUE	FALSE	TRUE	FALSE	TRUE	FALSE	FALSE
Nakatsuka_2023_Nature	California_SouthernMainland_LH	USA_CA_Malibu_3400BP.Capt	palevioletred3	3	I14825	FALSE	FALSE	FALSE	FALSE	TRUE	TRUE	TRUE	FALSE	TRUE	FALSE	TRUE	FALSE	FALSE
Nakatsuka_2023_Nature	California_SouthernMainland_MH	USA_CA_Goleta_4700BP.Capt	palevioletred3	21	I11288	FALSE	FALSE	FALSE	FALSE	TRUE	TRUE	TRUE	FALSE	TRUE	FALSE	TRUE	TRUE	FALSE
Nakatsuka_2023_Nature	California_SouthernMainland_MH	USA_CA_Goleta_4700BP.Capt	palevioletred3	21	I11289	FALSE	FALSE	FALSE	FALSE	TRUE	FALSE	TRUE	FALSE	TRUE	FALSE	TRUE	FALSE	FALSE
Nakatsuka_2023_Nature	SouthernNorthAmerica_LH	Mexico_CoyoteCave_2750BP.Capt	blueviolet	8	I1863	FALSE	FALSE	FALSE	FALSE	TRUE	FALSE	TRUE	FALSE	FALSE	FALSE	FALSE	FALSE	FALSE
Nakatsuka_2023_Nature	SouthernNorthAmerica_LH	Mexico_CoyoteCave_950BP.Capt	blueviolet	7	I1864	FALSE	FALSE	FALSE	FALSE	TRUE	TRUE	TRUE	FALSE	TRUE	FALSE	FALSE	FALSE	FALSE
Nakatsuka_2023_Nature	SouthernNorthAmerica_LH	Mexico_SanLorenzo_700BP.Capt	blueviolet	6	I1867	FALSE	FALSE	FALSE	FALSE	TRUE	FALSE	TRUE	FALSE	FALSE	FALSE	FALSE	FALSE	FALSE
Nakatsuka_2023_Nature	SouthernNorthAmerica_LH	Mexico_Tayopa_1000BP.Capt	blueviolet	5	I17113	FALSE	FALSE	FALSE	FALSE	TRUE	FALSE	TRUE	FALSE	FALSE	FALSE	FALSE	FALSE	FALSE
Nakatsuka_2023_Nature	SouthernNorthAmerica_LH	Mexico_Tayopa_1000BP.Capt	blueviolet	5	I17096	FALSE	FALSE	FALSE	FALSE	FALSE	FALSE	TRUE	FALSE	FALSE	FALSE	FALSE	FALSE	FALSE
Nakatsuka_2023_Nature	SouthernNorthAmerica_LH	Mexico_Tayopa_1000BP.Capt	blueviolet	5	I17114	FALSE	FALSE	FALSE	FALSE	TRUE	FALSE	TRUE	FALSE	FALSE	FALSE	FALSE	FALSE	FALSE
Nakatsuka_2023_Nature	SouthernNorthAmerica_LH	Mexico_Tayopa_1000BP.Capt	blueviolet	5	I17109	FALSE	FALSE	FALSE	FALSE	TRUE	FALSE	TRUE	FALSE	FALSE	FALSE	FALSE	FALSE	FALSE
NakatsukaLuisi_2020_NatComm	Pampa_LH	Argentina_LagunaToro_2400BP.Capt	lightblue	2	I12376	FALSE	FALSE	FALSE	FALSE	TRUE	FALSE	TRUE	TRUE	TRUE	FALSE	FALSE	FALSE	FALSE
NakatsukaLuisi_2020_NatComm	SouthPatagonia_LH	Argentina_BeagleChannel_Yamana_100BP.Capt	blue1	1	I12943	FALSE	FALSE	FALSE	FALSE	TRUE	TRUE	TRUE	TRUE	TRUE	FALSE	TRUE	TRUE	FALSE
NakatsukaLuisi_2020_NatComm	SouthPatagonia_LH	Argentina_BeagleChannel_Yamana_100BP.Capt	blue1	1	I12942	FALSE	FALSE	FALSE	FALSE	TRUE	TRUE	TRUE	TRUE	TRUE	FALSE	TRUE	FALSE	FALSE
NakatsukaLuisi_2020_NatComm	SouthPatagonia_LH	Argentina_BeagleChannel_Yamana_100BP.Capt	blue1	1	I12941	FALSE	FALSE	FALSE	FALSE	TRUE	TRUE	TRUE	TRUE	TRUE	FALSE	TRUE	TRUE	FALSE
NakatsukaLuisi_2020_NatComm	SouthPatagonia_LH	Argentina_BeagleChannel_Yamana_1500BP.Capt	blue1	2	I12355	FALSE	FALSE	FALSE	FALSE	TRUE	TRUE	TRUE	TRUE	TRUE	FALSE	FALSE	TRUE	FALSE
NakatsukaLuisi_2020_NatComm	SouthPatagonia_LH	Argentina_MitrePeninsula_Haush_400BP.Capt	blue1	3	I12356	FALSE	FALSE	FALSE	FALSE	TRUE	TRUE	TRUE	TRUE	TRUE	FALSE	TRUE	TRUE	FALSE
NakatsukaLuisi_2020_NatComm	SouthPatagonia_LH	Argentina_MitrePeninsula_Haush_400BP.Capt	blue1	3	I12360	FALSE	FALSE	FALSE	FALSE	TRUE	FALSE	TRUE	FALSE	FALSE	FALSE	TRUE	FALSE	FALSE
NakatsukaLuisi_2020_NatComm	SouthPatagonia_LH	Argentina_MitrePeninsula_Haush_400BP.Capt	blue1	3	I12359	FALSE	FALSE	FALSE	FALSE	TRUE	TRUE	TRUE	TRUE	TRUE	FALSE	TRUE	FALSE	FALSE
NakatsukaLuisi_2020_NatComm	SouthPatagonia_LH	Argentina_MitrePeninsula_Haush_400BP.Capt	blue1	3	I12358	FALSE	FALSE	FALSE	FALSE	TRUE	TRUE	TRUE	TRUE	TRUE	FALSE	TRUE	TRUE	FALSE
NakatsukaLuisi_2020_NatComm	SouthPatagonia_LH	Argentina_MitrePeninsula_Haush_400BP.Capt	blue1	3	I12357	FALSE	FALSE	FALSE	FALSE	TRUE	TRUE	TRUE	TRUE	TRUE	FALSE	TRUE	TRUE	FALSE
NakatsukaLuisi_2020_NatComm	SouthPatagonia_LH	Argentina_MitrePeninsula_Haush_400BP.Capt	blue1	3	I12361	FALSE	FALSE	FALSE	FALSE	TRUE	FALSE	TRUE	FALSE	FALSE	FALSE	TRUE	FALSE	FALSE
NakatsukaLuisi_2020_NatComm	SouthPatagonia_LH	Argentina_NorthTierradelFuego_Selknam_500BP.Capt	blue1	5	I12354	FALSE	FALSE	FALSE	FALSE	TRUE	TRUE	TRUE	TRUE	TRUE	FALSE	TRUE	TRUE	FALSE
NakatsukaLuisi_2020_NatComm	SouthPatagonia_LH	Argentina_NorthTierradelFuego_Selknam_500BP.Capt	blue1	5	I12367	FALSE	FALSE	FALSE	FALSE	TRUE	TRUE	TRUE	TRUE	TRUE	FALSE	TRUE	FALSE	FALSE
NakatsukaLuisi_2020_NatComm	SouthPatagonia_LH	Argentina_NorthTierradelFuego_Selknam_500BP.Capt	blue1	5	I12366	FALSE	FALSE	FALSE	FALSE	TRUE	TRUE	TRUE	TRUE	TRUE	FALSE	TRUE	TRUE	FALSE
NakatsukaLuisi_2020_NatComm	SouthPatagonia_LH	Argentina_NorthTierradelFuego_Selknam_500BP.Capt	blue1	5	I12364	FALSE	FALSE	FALSE	FALSE	TRUE	FALSE	TRUE	TRUE	TRUE	FALSE	TRUE	FALSE	FALSE
NakatsukaLuisi_2020_NatComm	SouthPatagonia_LH	Argentina_NorthTierradelFuego_Selknam_500BP.Capt	blue1	5	I12363	FALSE	FALSE	FALSE	FALSE	TRUE	TRUE	TRUE	TRUE	TRUE	FALSE	TRUE	FALSE	FALSE
NakatsukaLuisi_2020_NatComm	SouthPatagonia_LH	Chile_NorthTierradelFuego_Selknam_100BP.Capt	blue1	6	I8576	FALSE	FALSE	FALSE	FALSE	TRUE	TRUE	TRUE	TRUE	TRUE	FALSE	FALSE	TRUE	FALSE
NakatsukaLuisi_2020_NatComm	SouthPatagonia_LH	Chile_SouthernContinent_Aonikenk_400BP.Capt	blue1	7	I8575	FALSE	FALSE	FALSE	FALSE	TRUE	TRUE	TRUE	TRUE	TRUE	FALSE	FALSE	TRUE	FALSE
NakatsukaLuisi_2020_NatComm	SouthPatagonia_MH	Argentina_NorthTierradelFuego_LaArcillosa2_5800BP.Capt	blue3	21	I12362	FALSE	FALSE	FALSE	FALSE	TRUE	TRUE	TRUE	TRUE	TRUE	FALSE	FALSE	TRUE	FALSE
Pedersen_2021_MBE	Cuyo_LH	Argentina_Callingasta_1500BP.SG	brown3	1	SJArg-3	FALSE	FALSE	TRUE	TRUE	TRUE	FALSE	TRUE	FALSE	FALSE	TRUE	TRUE	FALSE	FALSE
Pedersen_2021_MBE	Cuyo_LH	Argentina_Callingasta_1500BP.SG	brown3	1	SJArg-1	FALSE	FALSE	TRUE	TRUE	TRUE	FALSE	TRUE	TRUE	TRUE	TRUE	TRUE	FALSE	FALSE
PosthNakatsuka_2018_Cell	Brazil_EH	Brazil_LapaDoSanto_9200BP.Capt	palegreen1	21	Lapa24	FALSE	FALSE	FALSE	FALSE	TRUE	TRUE	TRUE	TRUE	TRUE	FALSE	FALSE	TRUE	FALSE
PosthNakatsuka_2018_Cell	Brazil_EH	Brazil_LapaDoSanto_9600BP.Capt	palegreen1	21	Lapa05	FALSE	FALSE	FALSE	FALSE	TRUE	FALSE	TRUE	FALSE	FALSE	FALSE	TRUE	FALSE	FALSE
PosthNakatsuka_2018_Cell	Brazil_EH	Brazil_LapaDoSanto_9600BP.Capt	palegreen1	21	Lapa15	FALSE	FALSE	FALSE	FALSE	TRUE	TRUE	TRUE	TRUE	TRUE	FALSE	TRUE	TRUE	FALSE
PosthNakatsuka_2018_Cell	Brazil_EH	Brazil_LapaDoSanto_9600BP.Capt	palegreen1	21	Lapa14	FALSE	FALSE	FALSE	FALSE	TRUE	TRUE	TRUE	TRUE	TRUE	FALSE	TRUE	TRUE	FALSE
PosthNakatsuka_2018_Cell	Brazil_EH	Brazil_LapaDoSanto_9600BP.Capt	palegreen1	21	Lapa22	FALSE	FALSE	FALSE	FALSE	TRUE	TRUE	TRUE	TRUE	TRUE	FALSE	TRUE	TRUE	FALSE
PosthNakatsuka_2018_Cell	Brazil_EH	Brazil_LapaDoSanto_9600BP.Capt	palegreen1	21	Lapa25	FALSE	FALSE	FALSE	FALSE	TRUE	TRUE	TRUE	TRUE	TRUE	FALSE	TRUE	TRUE	FALSE
PosthNakatsuka_2018_Cell	Brazil_MH	Brazil_Laranjal_6600BP.Capt	palegreen4	22	LAR001	FALSE	FALSE	FALSE	FALSE	TRUE	TRUE	TRUE	TRUE	TRUE	FALSE	FALSE	FALSE	FALSE
PosthNakatsuka_2018_Cell	Brazil_MH	Brazil_Laranjal_6800BP.Capt	palegreen4	23	LAR002	FALSE	FALSE	FALSE	FALSE	TRUE	TRUE	TRUE	TRUE	TRUE	FALSE	FALSE	FALSE	FALSE
PosthNakatsuka_2018_Cell	Brazil_MH	Brazil_Moraes_5800BP.Capt	palegreen4	24	MOS001	FALSE	FALSE	FALSE	FALSE	TRUE	FALSE	TRUE	TRUE	TRUE	FALSE	FALSE	FALSE	FALSE
PosthNakatsuka_2018_Cell	CentralAmerica_MH	Belize_7400BP.Capt	mediumvioletred	24	I5456	FALSE	FALSE	FALSE	FALSE	TRUE	TRUE	TRUE	FALSE	TRUE	FALSE	TRUE	TRUE	FALSE
PosthNakatsuka_2018_Cell	CentralAmerica_MH	Belize_7400BP.Capt	mediumvioletred	24	I5457	FALSE	FALSE	FALSE	FALSE	TRUE	FALSE	TRUE	FALSE	TRUE	FALSE	TRUE	FALSE	FALSE
PosthNakatsuka_2018_Cell	CentralAndes_EH	Peru_Cuncaicha_9000BP.Capt	darkorange4	21	Cuncaicha15-07	FALSE	FALSE	FALSE	FALSE	TRUE	TRUE	TRUE	TRUE	TRUE	FALSE	FALSE	TRUE	FALSE
PosthNakatsuka_2018_Cell	CentralAndes_EH	Peru_Lauricocha_8600BP.Capt	darkorange4	22	I0041	FALSE	FALSE	FALSE	FALSE	TRUE	TRUE	TRUE	TRUE	TRUE	FALSE	TRUE	TRUE	FALSE
PosthNakatsuka_2018_Cell	CentralAndes_EH	Peru_Lauricocha_8600BP.Capt	darkorange4	22	I0238	FALSE	FALSE	FALSE	FALSE	TRUE	FALSE	TRUE	FALSE	FALSE	FALSE	TRUE	FALSE	FALSE
PosthNakatsuka_2018_Cell	CentralAndes_EH	Peru_Lauricocha_8600BP.Capt	darkorange4	22	I0038	FALSE	FALSE	FALSE	FALSE	TRUE	TRUE	TRUE	TRUE	TRUE	FALSE	TRUE	TRUE	FALSE
PosthNakatsuka_2018_Cell	CentralAndes_LateIntermediate_LH	Chile_PicaOcho_700BP.Capt	orange1	3	I2537	FALSE	FALSE	FALSE	FALSE	TRUE	TRUE	TRUE	TRUE	TRUE	FALSE	FALSE	FALSE	FALSE
PosthNakatsuka_2018_Cell	CentralAndes_MH	Peru_Cuncaicha_3300BP_contam.Capt	orange4	25	Cuncaicha15-04	FALSE	FALSE	FALSE	FALSE	TRUE	TRUE	TRUE	TRUE	TRUE	FALSE	FALSE	TRUE	FALSE
PosthNakatsuka_2018_Cell	CentralAndes_MH	Peru_Cuncaicha_4200BP.Capt	orange4	21	Cuncaicha15-03	FALSE	FALSE	FALSE	FALSE	TRUE	TRUE	TRUE	TRUE	TRUE	FALSE	FALSE	TRUE	FALSE
PosthNakatsuka_2018_Cell	CentralAndes_MH	Peru_LaGalgada_4100BP.Capt	orange4	22	I2261	FALSE	FALSE	FALSE	FALSE	TRUE	TRUE	TRUE	TRUE	TRUE	FALSE	FALSE	FALSE	FALSE
PosthNakatsuka_2018_Cell	CentralAndes_MH	Peru_Lauricocha_3500BP.Capt	orange4	23	I0039	FALSE	FALSE	FALSE	FALSE	TRUE	TRUE	TRUE	TRUE	TRUE	FALSE	FALSE	TRUE	FALSE
PosthNakatsuka_2018_Cell	CentralAndes_MH	Peru_Lauricocha_5800BP.Capt	orange4	24	I0040	FALSE	FALSE	FALSE	FALSE	TRUE	TRUE	TRUE	TRUE	TRUE	FALSE	FALSE	TRUE	FALSE
PosthNakatsuka_2018_Cell	CentralAndes_MiddleHorizon_LH	Peru_Laramate_900BP.Capt	orange2	8	I1484	FALSE	FALSE	FALSE	FALSE	TRUE	TRUE	TRUE	TRUE	TRUE	FALSE	TRUE	TRUE	FALSE
PosthNakatsuka_2018_Cell	CentralAndes_MiddleHorizon_LH	Peru_Laramate_900BP.Capt	orange2	8	I1742	FALSE	FALSE	FALSE	FALSE	TRUE	TRUE	TRUE	TRUE	TRUE	FALSE	TRUE	TRUE	FALSE
PosthNakatsuka_2018_Cell	CentralAndes_MiddleHorizon_LH	Peru_Laramate_900BP.Capt	orange2	8	I1485	FALSE	FALSE	FALSE	FALSE	TRUE	TRUE	TRUE	TRUE	TRUE	FALSE	TRUE	TRUE	FALSE
PosthNakatsuka_2018_Cell	CentralAndes_MiddleHorizon_LH	Peru_Laramate_900BP.Capt	orange2	8	I1357	FALSE	FALSE	FALSE	FALSE	TRUE	TRUE	TRUE	TRUE	TRUE	FALSE	TRUE	FALSE	FALSE
PosthNakatsuka_2018_Cell	CentralAndes_MiddleHorizon_LH	Peru_Laramate_900BP.Capt	orange2	8	I2551	FALSE	FALSE	FALSE	FALSE	TRUE	TRUE	TRUE	TRUE	TRUE	FALSE	TRUE	FALSE	FALSE
PosthNakatsuka_2018_Cell	CentralAndes_MiddleHorizon_LH	Peru_Laramate_900BP.Capt	orange2	8	I0237	FALSE	FALSE	FALSE	FALSE	TRUE	TRUE	TRUE	TRUE	TRUE	FALSE	TRUE	FALSE	FALSE
PosthNakatsuka_2018_Cell	CentralChile_EH	Chile_LosRieles_12000BP.Capt	brown1	21	I11974	FALSE	FALSE	FALSE	FALSE	TRUE	TRUE	TRUE	FALSE	TRUE	FALSE	FALSE	TRUE	FALSE
PosthNakatsuka_2018_Cell	CentralChile_LH	Chile_Conchali_700BP.Capt	brown1	1	I1754	FALSE	FALSE	FALSE	FALSE	TRUE	TRUE	TRUE	TRUE	TRUE	FALSE	TRUE	FALSE	FALSE
PosthNakatsuka_2018_Cell	CentralChile_LH	Chile_Conchali_700BP.Capt	brown1	1	I1752	FALSE	FALSE	FALSE	FALSE	TRUE	TRUE	TRUE	TRUE	TRUE	FALSE	TRUE	FALSE	FALSE
PosthNakatsuka_2018_Cell	CentralChile_MH	Chile_LosRieles_5100BP.Capt	brown1	23	I1753	FALSE	FALSE	FALSE	FALSE	TRUE	TRUE	TRUE	TRUE	TRUE	FALSE	FALSE	TRUE	FALSE
PosthNakatsuka_2018_Cell	Pampa_MH	Argentina_ArroyoSeco2_7200BP.Capt	lightblue	21	I7090	FALSE	FALSE	FALSE	FALSE	TRUE	FALSE	TRUE	TRUE	TRUE	FALSE	FALSE	FALSE	FALSE
PosthNakatsuka_2018_Cell	Pampa_MH	Argentina_ArroyoSeco2_7700BP.Capt	lightblue	22	I2230	FALSE	FALSE	FALSE	FALSE	TRUE	TRUE	TRUE	TRUE	TRUE	FALSE	TRUE	TRUE	FALSE
PosthNakatsuka_2018_Cell	Pampa_MH	Argentina_ArroyoSeco2_7700BP.Capt	lightblue	22	I0309	FALSE	FALSE	FALSE	FALSE	TRUE	TRUE	TRUE	TRUE	TRUE	FALSE	TRUE	TRUE	FALSE
PosthNakatsuka_2018_Cell	Pampa_MH	Argentina_ArroyoSeco2_7700BP.Capt	lightblue	22	I0308	FALSE	FALSE	FALSE	FALSE	TRUE	TRUE	TRUE	TRUE	TRUE	FALSE	TRUE	FALSE	FALSE
PosthNakatsuka_2018_Cell	Pampa_MH	Argentina_ArroyoSeco2_7700BP.Capt	lightblue	22	I7086	FALSE	FALSE	FALSE	FALSE	TRUE	FALSE	TRUE	FALSE	FALSE	FALSE	TRUE	FALSE	FALSE
PosthNakatsuka_2018_Cell	Pampa_MH	Argentina_LagunaChica_6800BP.Capt	lightblue	23	I8350	FALSE	FALSE	FALSE	FALSE	FALSE	FALSE	TRUE	FALSE	FALSE	FALSE	FALSE	FALSE	FALSE
PosthNakatsuka_2018_Cell	Pampa_MH	Argentina_LagunaChica_6800BP.Capt	lightblue	23	I8349	FALSE	FALSE	FALSE	FALSE	TRUE	TRUE	TRUE	TRUE	TRUE	FALSE	TRUE	FALSE	FALSE
PosthNakatsuka_2018_Cell	Pampa_MH	Argentina_LagunaChica_6800BP.Capt	lightblue	23	I8348	FALSE	FALSE	FALSE	FALSE	TRUE	FALSE	TRUE	TRUE	TRUE	FALSE	TRUE	FALSE	FALSE
Raghavan_2015_Science	Brazil_MH	Brazil_Enoque_3500BP.SG	palegreen4	21	Enoque65	FALSE	FALSE	TRUE	FALSE	FALSE	FALSE	TRUE	FALSE	FALSE	FALSE	FALSE	FALSE	FALSE
Raghavan_2015_Science	California_Baja_LH	Mexico_Pericues.SG	palevioletred1	3	BC25	FALSE	FALSE	TRUE	TRUE	TRUE	FALSE	TRUE	FALSE	FALSE	FALSE	FALSE	FALSE	FALSE
Raghavan_2015_Science	CentralAmerica_UnmaskedModern	Huichol	violetred2	4	HUI03	FALSE	FALSE	FALSE	FALSE	FALSE	FALSE	FALSE	FALSE	TRUE	FALSE	FALSE	FALSE	FALSE
Raghavan_2015_Science	CentralAndes_UnmaskedModern	Aymara	darkorange3	4	TA6	FALSE	FALSE	FALSE	FALSE	FALSE	FALSE	FALSE	FALSE	TRUE	FALSE	FALSE	FALSE	FALSE
Raghavan_2015_Science	SouthPatagonia_LH	Argentina_BeagleChannel_Yamana_100BP.SG	blue1	1	Yaghan894	FALSE	FALSE	TRUE	TRUE	TRUE	TRUE	TRUE	TRUE	TRUE	TRUE	TRUE	TRUE	FALSE
Raghavan_2015_Science	SouthPatagonia_LH	Argentina_BeagleChannel_Yamana_100BP.SG	blue1	1	Yaghan890	FALSE	FALSE	TRUE	TRUE	TRUE	FALSE	TRUE	TRUE	TRUE	TRUE	TRUE	FALSE	FALSE
Raghavan_2015_Science	SouthPatagonia_LH	Argentina_BeagleChannel_Yamana_100BP.SG	blue1	1	Yaghan895	FALSE	FALSE	TRUE	TRUE	TRUE	TRUE	TRUE	TRUE	TRUE	TRUE	TRUE	TRUE	FALSE
Raghavan_2015_Science	SouthPatagonia_LH	Argentina_NorthTierradelFiego_Selknam_100BP.SG	blue1	4	MA577	FALSE	FALSE	TRUE	TRUE	TRUE	TRUE	TRUE	TRUE	TRUE	FALSE	FALSE	FALSE	FALSE
Raghavan_2015_Science	SouthPatagonia_LH	Chile_StraitOfMagellan_Kaweskar_100BP.SG	blue1	8	AM71	FALSE	FALSE	TRUE	TRUE	TRUE	FALSE	TRUE	FALSE	FALSE	TRUE	TRUE	FALSE	FALSE
Raghavan_2015_Science	SouthPatagonia_LH	Chile_StraitOfMagellan_Kaweskar_100BP.SG	blue1	8	AM74	FALSE	FALSE	TRUE	TRUE	TRUE	TRUE	TRUE	TRUE	TRUE	TRUE	TRUE	FALSE	FALSE
Rasmussen_2014_Nature	SouthernNorthAmerica_EH	USA_Anzick.SG	blueviolet	21	Anzick	FALSE	FALSE	TRUE	TRUE	TRUE	TRUE	TRUE	FALSE	TRUE	FALSE	FALSE	FALSE	FALSE
Reich_2012_Nature	Amazonia_Modern	Arara-Reich	palegreen3	9	PT-GLG1	FALSE	FALSE	FALSE	FALSE	FALSE	FALSE	FALSE	FALSE	TRUE	FALSE	FALSE	FALSE	FALSE
Reich_2012_Nature	Amazonia_Modern	Arhuaco-Reich	palegreen2	3	PT-91CT	FALSE	FALSE	FALSE	FALSE	FALSE	FALSE	FALSE	FALSE	TRUE	FALSE	FALSE	FALSE	FALSE
Reich_2012_Nature	Amazonia_Modern	Arhuaco-Reich	palegreen2	3	PT-GLHM	FALSE	FALSE	FALSE	FALSE	FALSE	FALSE	FALSE	FALSE	TRUE	FALSE	FALSE	FALSE	FALSE
Reich_2012_Nature	Amazonia_Modern	Arhuaco-Reich	palegreen2	3	PT-GLHA	FALSE	FALSE	FALSE	FALSE	FALSE	FALSE	FALSE	FALSE	TRUE	FALSE	FALSE	FALSE	FALSE
Reich_2012_Nature	Amazonia_Modern	Arhuaco-Reich	palegreen2	3	PT-91CV	FALSE	FALSE	FALSE	FALSE	FALSE	FALSE	FALSE	FALSE	TRUE	FALSE	FALSE	FALSE	FALSE
Reich_2012_Nature	Amazonia_Modern	Arhuaco-Reich	palegreen2	3	PT-91CX	FALSE	FALSE	FALSE	FALSE	FALSE	FALSE	FALSE	FALSE	TRUE	FALSE	FALSE	FALSE	FALSE
Reich_2012_Nature	Amazonia_Modern	Chane-Reich	palegreen2	5	PT-GLG7	FALSE	FALSE	FALSE	FALSE	FALSE	FALSE	FALSE	FALSE	TRUE	FALSE	FALSE	FALSE	FALSE
Reich_2012_Nature	Amazonia_Modern	Chane-Reich	palegreen2	5	PT-GLGJ	FALSE	FALSE	FALSE	FALSE	FALSE	FALSE	FALSE	FALSE	TRUE	FALSE	FALSE	FALSE	FALSE
Reich_2012_Nature	Amazonia_Modern	Embera-Reich	palegreen2	6	PT-91D9	FALSE	FALSE	FALSE	FALSE	FALSE	FALSE	FALSE	FALSE	TRUE	FALSE	FALSE	FALSE	FALSE
Reich_2012_Nature	Amazonia_Modern	Embera-Reich	palegreen2	6	PT-91DA	FALSE	FALSE	FALSE	FALSE	FALSE	FALSE	FALSE	FALSE	TRUE	FALSE	FALSE	FALSE	FALSE
Reich_2012_Nature	Amazonia_Modern	Embera-Reich	palegreen2	6	PT-91DC	FALSE	FALSE	FALSE	FALSE	FALSE	FALSE	FALSE	FALSE	TRUE	FALSE	FALSE	FALSE	FALSE
Reich_2012_Nature	Amazonia_Modern	Embera-Reich	palegreen2	6	PT-GLGQ	FALSE	FALSE	FALSE	FALSE	FALSE	FALSE	FALSE	FALSE	TRUE	FALSE	FALSE	FALSE	FALSE
Reich_2012_Nature	Amazonia_Modern	Embera-Reich	palegreen2	6	PT-GLH3	FALSE	FALSE	FALSE	FALSE	FALSE	FALSE	FALSE	FALSE	TRUE	FALSE	FALSE	FALSE	FALSE
Reich_2012_Nature	Amazonia_Modern	Guahibo-Reich	palegreen2	7	4256126566_A	FALSE	FALSE	FALSE	FALSE	FALSE	FALSE	FALSE	FALSE	TRUE	FALSE	FALSE	FALSE	FALSE
Reich_2012_Nature	Amazonia_Modern	Guahibo-Reich	palegreen2	7	4256126568_A	FALSE	FALSE	FALSE	FALSE	FALSE	FALSE	FALSE	FALSE	TRUE	FALSE	FALSE	FALSE	FALSE
Reich_2012_Nature	Amazonia_Modern	Guahibo-Reich	palegreen2	7	4256126576_A	FALSE	FALSE	FALSE	FALSE	FALSE	FALSE	FALSE	FALSE	TRUE	FALSE	FALSE	FALSE	FALSE
Reich_2012_Nature	Amazonia_Modern	Guahibo-Reich	palegreen2	7	4256126451_A	FALSE	FALSE	FALSE	FALSE	FALSE	FALSE	FALSE	FALSE	TRUE	FALSE	FALSE	FALSE	FALSE
Reich_2012_Nature	Amazonia_Modern	Guahibo-Reich	palegreen2	7	4256126575_A	FALSE	FALSE	FALSE	FALSE	FALSE	FALSE	FALSE	FALSE	TRUE	FALSE	FALSE	FALSE	FALSE
Reich_2012_Nature	Amazonia_Modern	Guahibo-Reich	palegreen2	7	4256126387_A	FALSE	FALSE	FALSE	FALSE	FALSE	FALSE	FALSE	FALSE	TRUE	FALSE	FALSE	FALSE	FALSE
Reich_2012_Nature	Amazonia_Modern	Guarani-Reich	palegreen2	8	PT-GLGV	FALSE	FALSE	FALSE	FALSE	FALSE	FALSE	FALSE	FALSE	TRUE	FALSE	FALSE	FALSE	FALSE
Reich_2012_Nature	Amazonia_Modern	Guarani-Reich	palegreen2	8	PT-GLH7	FALSE	FALSE	FALSE	FALSE	FALSE	FALSE	FALSE	FALSE	TRUE	FALSE	FALSE	FALSE	FALSE
Reich_2012_Nature	Amazonia_Modern	Guarani-Reich	palegreen2	8	PT-GLFU	FALSE	FALSE	FALSE	FALSE	FALSE	FALSE	FALSE	FALSE	TRUE	FALSE	FALSE	FALSE	FALSE
Reich_2012_Nature	Amazonia_Modern	Guarani-Reich	palegreen2	8	PT-GLHJ	FALSE	FALSE	FALSE	FALSE	FALSE	FALSE	FALSE	FALSE	TRUE	FALSE	FALSE	FALSE	FALSE
Reich_2012_Nature	Amazonia_Modern	Guarani-Reich	palegreen2	8	PT-91EO	FALSE	FALSE	FALSE	FALSE	FALSE	FALSE	FALSE	FALSE	TRUE	FALSE	FALSE	FALSE	FALSE
Reich_2012_Nature	Amazonia_Modern	Guarani-Reich	palegreen2	8	PT-GLFI	FALSE	FALSE	FALSE	FALSE	FALSE	FALSE	FALSE	FALSE	TRUE	FALSE	FALSE	FALSE	FALSE
Reich_2012_Nature	Amazonia_Modern	Jamamadi-Reich	palegreen3	10	PT-9GRL	FALSE	FALSE	FALSE	FALSE	FALSE	FALSE	FALSE	FALSE	TRUE	FALSE	FALSE	FALSE	FALSE
Reich_2012_Nature	Amazonia_Modern	Kaingang-Reich	palegreen2	9	PT-91EU	FALSE	FALSE	FALSE	FALSE	FALSE	FALSE	FALSE	FALSE	TRUE	FALSE	FALSE	FALSE	FALSE
Reich_2012_Nature	Amazonia_Modern	Kaingang-Reich	palegreen2	9	PT-91ET	FALSE	FALSE	FALSE	FALSE	FALSE	FALSE	FALSE	FALSE	TRUE	FALSE	FALSE	FALSE	FALSE
Reich_2012_Nature	Amazonia_Modern	Karitiana-Reich	palegreen2	10	HGDP01003	FALSE	FALSE	FALSE	FALSE	FALSE	FALSE	FALSE	FALSE	TRUE	FALSE	FALSE	FALSE	FALSE
Reich_2012_Nature	Amazonia_Modern	Karitiana-Reich	palegreen2	10	HGDP01006	FALSE	FALSE	FALSE	FALSE	FALSE	FALSE	FALSE	FALSE	TRUE	FALSE	FALSE	FALSE	FALSE
Reich_2012_Nature	Amazonia_Modern	Kogi-Reich	palegreen2	11	PT-GLFW	FALSE	FALSE	FALSE	FALSE	FALSE	FALSE	FALSE	FALSE	TRUE	FALSE	FALSE	FALSE	FALSE
Reich_2012_Nature	Amazonia_Modern	Kogi-Reich	palegreen2	11	PT-GLGX	FALSE	FALSE	FALSE	FALSE	FALSE	FALSE	FALSE	FALSE	TRUE	FALSE	FALSE	FALSE	FALSE
Reich_2012_Nature	Amazonia_Modern	Kogi-Reich	palegreen2	11	PT-91D6	FALSE	FALSE	FALSE	FALSE	FALSE	FALSE	FALSE	FALSE	TRUE	FALSE	FALSE	FALSE	FALSE
Reich_2012_Nature	Amazonia_Modern	Kogi-Reich	palegreen2	11	PT-GLGL	FALSE	FALSE	FALSE	FALSE	FALSE	FALSE	FALSE	FALSE	TRUE	FALSE	FALSE	FALSE	FALSE
Reich_2012_Nature	Amazonia_Modern	Palikur-Reich	palegreen2	12	PT-8ZVL	FALSE	FALSE	FALSE	FALSE	FALSE	FALSE	FALSE	FALSE	TRUE	FALSE	FALSE	FALSE	FALSE
Reich_2012_Nature	Amazonia_Modern	Palikur-Reich	palegreen2	12	PT-8ZVJ	FALSE	FALSE	FALSE	FALSE	FALSE	FALSE	FALSE	FALSE	TRUE	FALSE	FALSE	FALSE	FALSE
Reich_2012_Nature	Amazonia_Modern	Palikur-Reich	palegreen2	12	PT-8ZVK	FALSE	FALSE	FALSE	FALSE	FALSE	FALSE	FALSE	FALSE	TRUE	FALSE	FALSE	FALSE	FALSE
Reich_2012_Nature	Amazonia_Modern	Parakana-Reich	palegreen3	11	PT-9GRW	FALSE	FALSE	FALSE	FALSE	FALSE	FALSE	FALSE	FALSE	TRUE	FALSE	FALSE	FALSE	FALSE
Reich_2012_Nature	Amazonia_Modern	Surui-Reich	palegreen2	14	4256126036_A	FALSE	FALSE	FALSE	FALSE	FALSE	FALSE	FALSE	FALSE	TRUE	FALSE	FALSE	FALSE	FALSE
Reich_2012_Nature	Amazonia_Modern	Surui-Reich	palegreen2	14	4256126330_A	FALSE	FALSE	FALSE	FALSE	FALSE	FALSE	FALSE	FALSE	TRUE	FALSE	FALSE	FALSE	FALSE
Reich_2012_Nature	Amazonia_Modern	Surui-Reich	palegreen2	14	4256126002_A	FALSE	FALSE	FALSE	FALSE	FALSE	FALSE	FALSE	FALSE	TRUE	FALSE	FALSE	FALSE	FALSE
Reich_2012_Nature	Amazonia_Modern	Surui-Reich	palegreen2	14	4256126172_A	FALSE	FALSE	FALSE	FALSE	FALSE	FALSE	FALSE	FALSE	TRUE	FALSE	FALSE	FALSE	FALSE
Reich_2012_Nature	Amazonia_Modern	Surui-Reich	palegreen2	14	4256126171_A	FALSE	FALSE	FALSE	FALSE	FALSE	FALSE	FALSE	FALSE	TRUE	FALSE	FALSE	FALSE	FALSE
Reich_2012_Nature	Amazonia_Modern	Surui-Reich	palegreen2	14	4256126341_A	FALSE	FALSE	FALSE	FALSE	FALSE	FALSE	FALSE	FALSE	TRUE	FALSE	FALSE	FALSE	FALSE
Reich_2012_Nature	Amazonia_Modern	Surui-Reich	palegreen2	14	4256126183_A	FALSE	FALSE	FALSE	FALSE	FALSE	FALSE	FALSE	FALSE	TRUE	FALSE	FALSE	FALSE	FALSE
Reich_2012_Nature	Amazonia_Modern	Surui-Reich	palegreen2	14	4256126173_A	FALSE	FALSE	FALSE	FALSE	FALSE	FALSE	FALSE	FALSE	TRUE	FALSE	FALSE	FALSE	FALSE
Reich_2012_Nature	Amazonia_Modern	Surui-Reich	palegreen2	14	4256126004_A	FALSE	FALSE	FALSE	FALSE	FALSE	FALSE	FALSE	FALSE	TRUE	FALSE	FALSE	FALSE	FALSE
Reich_2012_Nature	Amazonia_Modern	Surui-Reich	palegreen2	14	4256126376_A	FALSE	FALSE	FALSE	FALSE	FALSE	FALSE	FALSE	FALSE	TRUE	FALSE	FALSE	FALSE	FALSE
Reich_2012_Nature	Amazonia_Modern	Surui-Reich	palegreen2	14	4256126086_A	FALSE	FALSE	FALSE	FALSE	FALSE	FALSE	FALSE	FALSE	TRUE	FALSE	FALSE	FALSE	FALSE
Reich_2012_Nature	Amazonia_Modern	Surui-Reich	palegreen2	14	4256126311_A	FALSE	FALSE	FALSE	FALSE	FALSE	FALSE	FALSE	FALSE	TRUE	FALSE	FALSE	FALSE	FALSE
Reich_2012_Nature	Amazonia_Modern	Surui-Reich	palegreen2	14	4256126001_A	FALSE	FALSE	FALSE	FALSE	FALSE	FALSE	FALSE	FALSE	TRUE	FALSE	FALSE	FALSE	FALSE
Reich_2012_Nature	Amazonia_Modern	Surui-Reich	palegreen2	14	4256126202_A	FALSE	FALSE	FALSE	FALSE	FALSE	FALSE	FALSE	FALSE	TRUE	FALSE	FALSE	FALSE	FALSE
Reich_2012_Nature	Amazonia_Modern	Surui-Reich	palegreen2	14	4256126312_A	FALSE	FALSE	FALSE	FALSE	FALSE	FALSE	FALSE	FALSE	TRUE	FALSE	FALSE	FALSE	FALSE
Reich_2012_Nature	Amazonia_Modern	Surui-Reich	palegreen2	14	4256126007_A	FALSE	FALSE	FALSE	FALSE	FALSE	FALSE	FALSE	FALSE	TRUE	FALSE	FALSE	FALSE	FALSE
Reich_2012_Nature	Amazonia_Modern	Ticuna-Reich	palegreen3	1	PT-GLGE	FALSE	FALSE	FALSE	FALSE	FALSE	FALSE	FALSE	FALSE	TRUE	FALSE	FALSE	FALSE	FALSE
Reich_2012_Nature	Amazonia_Modern	Ticuna-Reich	palegreen3	1	PT-91D3	FALSE	FALSE	FALSE	FALSE	FALSE	FALSE	FALSE	FALSE	TRUE	FALSE	FALSE	FALSE	FALSE
Reich_2012_Nature	Amazonia_Modern	Ticuna-Reich	palegreen3	1	PT-91CZ	FALSE	FALSE	FALSE	FALSE	FALSE	FALSE	FALSE	FALSE	TRUE	FALSE	FALSE	FALSE	FALSE
Reich_2012_Nature	Amazonia_Modern	Ticuna-Reich	palegreen3	1	PT-GLG2	FALSE	FALSE	FALSE	FALSE	FALSE	FALSE	FALSE	FALSE	TRUE	FALSE	FALSE	FALSE	FALSE
Reich_2012_Nature	Amazonia_Modern	Ticuna-Reich	palegreen3	1	PT-91CY	FALSE	FALSE	FALSE	FALSE	FALSE	FALSE	FALSE	FALSE	TRUE	FALSE	FALSE	FALSE	FALSE
Reich_2012_Nature	Amazonia_Modern	Ticuna-Reich	palegreen3	1	PT-GLFP	FALSE	FALSE	FALSE	FALSE	FALSE	FALSE	FALSE	FALSE	TRUE	FALSE	FALSE	FALSE	FALSE
Reich_2012_Nature	Amazonia_Modern	Toba-Reich	palegreen3	2	PT-GLH8	FALSE	FALSE	FALSE	FALSE	FALSE	FALSE	FALSE	FALSE	TRUE	FALSE	FALSE	FALSE	FALSE
Reich_2012_Nature	Amazonia_Modern	Toba-Reich	palegreen3	2	PT-GLG8	FALSE	FALSE	FALSE	FALSE	FALSE	FALSE	FALSE	FALSE	TRUE	FALSE	FALSE	FALSE	FALSE
Reich_2012_Nature	Amazonia_Modern	Toba-Reich	palegreen3	2	PT-GLFV	FALSE	FALSE	FALSE	FALSE	FALSE	FALSE	FALSE	FALSE	TRUE	FALSE	FALSE	FALSE	FALSE
Reich_2012_Nature	Amazonia_Modern	Toba-Reich	palegreen3	2	PT-GLFJ	FALSE	FALSE	FALSE	FALSE	FALSE	FALSE	FALSE	FALSE	TRUE	FALSE	FALSE	FALSE	FALSE
Reich_2012_Nature	Amazonia_Modern	Wayuu-Reich	palegreen3	4	PT-9GSC	FALSE	FALSE	FALSE	FALSE	FALSE	FALSE	FALSE	FALSE	TRUE	FALSE	FALSE	FALSE	FALSE
Reich_2012_Nature	Amazonia_Modern	Wayuu-Reich	palegreen3	4	PT-91DL	FALSE	FALSE	FALSE	FALSE	FALSE	FALSE	FALSE	FALSE	TRUE	FALSE	FALSE	FALSE	FALSE
Reich_2012_Nature	Amazonia_Modern	Wayuu-Reich	palegreen3	4	PT-91DQ	FALSE	FALSE	FALSE	FALSE	FALSE	FALSE	FALSE	FALSE	TRUE	FALSE	FALSE	FALSE	FALSE
Reich_2012_Nature	Amazonia_Modern	Wayuu-Reich	palegreen3	4	PT-91E9	FALSE	FALSE	FALSE	FALSE	FALSE	FALSE	FALSE	FALSE	TRUE	FALSE	FALSE	FALSE	FALSE
Reich_2012_Nature	Amazonia_Modern	Wayuu-Reich	palegreen3	4	PT-91DW	FALSE	FALSE	FALSE	FALSE	FALSE	FALSE	FALSE	FALSE	TRUE	FALSE	FALSE	FALSE	FALSE
Reich_2012_Nature	Amazonia_Modern	Wayuu-Reich	palegreen3	4	PT-91EF	FALSE	FALSE	FALSE	FALSE	FALSE	FALSE	FALSE	FALSE	TRUE	FALSE	FALSE	FALSE	FALSE
Reich_2012_Nature	Amazonia_Modern	Wayuu-Reich	palegreen3	4	PT-9GSB	FALSE	FALSE	FALSE	FALSE	FALSE	FALSE	FALSE	FALSE	TRUE	FALSE	FALSE	FALSE	FALSE
Reich_2012_Nature	Amazonia_Modern	Wayuu-Reich	palegreen3	4	PT-91DX	FALSE	FALSE	FALSE	FALSE	FALSE	FALSE	FALSE	FALSE	TRUE	FALSE	FALSE	FALSE	FALSE
Reich_2012_Nature	Amazonia_Modern	Wayuu-Reich	palegreen3	4	PT-9GS6	FALSE	FALSE	FALSE	FALSE	FALSE	FALSE	FALSE	FALSE	TRUE	FALSE	FALSE	FALSE	FALSE
Reich_2012_Nature	Amazonia_Modern	Wayuu-Reich	palegreen3	4	PT-9GS8	FALSE	FALSE	FALSE	FALSE	FALSE	FALSE	FALSE	FALSE	TRUE	FALSE	FALSE	FALSE	FALSE
Reich_2012_Nature	Amazonia_Modern	Wayuu-Reich	palegreen3	4	PT-9GS9	FALSE	FALSE	FALSE	FALSE	FALSE	FALSE	FALSE	FALSE	TRUE	FALSE	FALSE	FALSE	FALSE
Reich_2012_Nature	Amazonia_Modern	Wichi-Reich	palegreen3	5	PT-GLGU	FALSE	FALSE	FALSE	FALSE	FALSE	FALSE	FALSE	FALSE	TRUE	FALSE	FALSE	FALSE	FALSE
Reich_2012_Nature	Amazonia_Modern	Wichi-Reich	palegreen3	5	PT-GLG6	FALSE	FALSE	FALSE	FALSE	FALSE	FALSE	FALSE	FALSE	TRUE	FALSE	FALSE	FALSE	FALSE
Reich_2012_Nature	Amazonia_Modern	Wichi-Reich	palegreen3	5	PT-GLFH	FALSE	FALSE	FALSE	FALSE	FALSE	FALSE	FALSE	FALSE	TRUE	FALSE	FALSE	FALSE	FALSE
Reich_2012_Nature	Amazonia_Modern	Wichi-Reich	palegreen3	5	PT-GLGI	FALSE	FALSE	FALSE	FALSE	FALSE	FALSE	FALSE	FALSE	TRUE	FALSE	FALSE	FALSE	FALSE
Reich_2012_Nature	Amazonia_Modern	Wichi-Reich	palegreen3	5	PT-GLFT	FALSE	FALSE	FALSE	FALSE	FALSE	FALSE	FALSE	FALSE	TRUE	FALSE	FALSE	FALSE	FALSE
Reich_2012_Nature	CentralAmerica_Modern	Bribri-Reich	violetred2	6	PT-918W	FALSE	FALSE	FALSE	FALSE	FALSE	FALSE	FALSE	FALSE	TRUE	FALSE	FALSE	FALSE	FALSE
Reich_2012_Nature	CentralAmerica_Modern	Bribri-Reich	violetred2	6	PT-918T	FALSE	FALSE	FALSE	FALSE	FALSE	FALSE	FALSE	FALSE	TRUE	FALSE	FALSE	FALSE	FALSE
Reich_2012_Nature	CentralAmerica_Modern	Bribri-Reich	violetred2	6	PT-918X	FALSE	FALSE	FALSE	FALSE	FALSE	FALSE	FALSE	FALSE	TRUE	FALSE	FALSE	FALSE	FALSE
Reich_2012_Nature	CentralAmerica_Modern	Bribri-Reich	violetred2	6	PT-918U	FALSE	FALSE	FALSE	FALSE	FALSE	FALSE	FALSE	FALSE	TRUE	FALSE	FALSE	FALSE	FALSE
Reich_2012_Nature	CentralAmerica_Modern	Cabecar-Reich	violetred2	7	PT-918N	FALSE	FALSE	FALSE	FALSE	FALSE	FALSE	FALSE	FALSE	TRUE	FALSE	FALSE	FALSE	FALSE
Reich_2012_Nature	CentralAmerica_Modern	Cabecar-Reich	violetred2	7	PT-9187	FALSE	FALSE	FALSE	FALSE	FALSE	FALSE	FALSE	FALSE	TRUE	FALSE	FALSE	FALSE	FALSE
Reich_2012_Nature	CentralAmerica_Modern	Cabecar-Reich	violetred2	7	PT-917N	FALSE	FALSE	FALSE	FALSE	FALSE	FALSE	FALSE	FALSE	TRUE	FALSE	FALSE	FALSE	FALSE
Reich_2012_Nature	CentralAmerica_Modern	Cabecar-Reich	violetred2	7	PT-918I	FALSE	FALSE	FALSE	FALSE	FALSE	FALSE	FALSE	FALSE	TRUE	FALSE	FALSE	FALSE	FALSE
Reich_2012_Nature	CentralAmerica_Modern	Cabecar-Reich	violetred2	7	PT-917Y	FALSE	FALSE	FALSE	FALSE	FALSE	FALSE	FALSE	FALSE	TRUE	FALSE	FALSE	FALSE	FALSE
Reich_2012_Nature	CentralAmerica_Modern	Cabecar-Reich	violetred2	7	PT-917S	FALSE	FALSE	FALSE	FALSE	FALSE	FALSE	FALSE	FALSE	TRUE	FALSE	FALSE	FALSE	FALSE
Reich_2012_Nature	CentralAmerica_Modern	Cabecar-Reich	violetred2	7	PT-9181	FALSE	FALSE	FALSE	FALSE	FALSE	FALSE	FALSE	FALSE	TRUE	FALSE	FALSE	FALSE	FALSE
Reich_2012_Nature	CentralAmerica_Modern	Cabecar-Reich	violetred2	7	PT-917K	FALSE	FALSE	FALSE	FALSE	FALSE	FALSE	FALSE	FALSE	TRUE	FALSE	FALSE	FALSE	FALSE
Reich_2012_Nature	CentralAmerica_Modern	Cabecar-Reich	violetred2	7	PT-918D	FALSE	FALSE	FALSE	FALSE	FALSE	FALSE	FALSE	FALSE	TRUE	FALSE	FALSE	FALSE	FALSE
Reich_2012_Nature	CentralAmerica_Modern	Cabecar-Reich	violetred2	7	PT-917T	FALSE	FALSE	FALSE	FALSE	FALSE	FALSE	FALSE	FALSE	TRUE	FALSE	FALSE	FALSE	FALSE
Reich_2012_Nature	CentralAmerica_Modern	Cabecar-Reich	violetred2	7	PT-918F	FALSE	FALSE	FALSE	FALSE	FALSE	FALSE	FALSE	FALSE	TRUE	FALSE	FALSE	FALSE	FALSE
Reich_2012_Nature	CentralAmerica_Modern	Cabecar-Reich	violetred2	7	PT-918C	FALSE	FALSE	FALSE	FALSE	FALSE	FALSE	FALSE	FALSE	TRUE	FALSE	FALSE	FALSE	FALSE
Reich_2012_Nature	CentralAmerica_Modern	Cabecar-Reich	violetred2	7	PT-918B	FALSE	FALSE	FALSE	FALSE	FALSE	FALSE	FALSE	FALSE	TRUE	FALSE	FALSE	FALSE	FALSE
Reich_2012_Nature	CentralAmerica_Modern	Cabecar-Reich	violetred2	7	PT-917U	FALSE	FALSE	FALSE	FALSE	FALSE	FALSE	FALSE	FALSE	TRUE	FALSE	FALSE	FALSE	FALSE
Reich_2012_Nature	CentralAmerica_Modern	Cabecar-Reich	violetred2	7	PT-917X	FALSE	FALSE	FALSE	FALSE	FALSE	FALSE	FALSE	FALSE	TRUE	FALSE	FALSE	FALSE	FALSE
Reich_2012_Nature	CentralAmerica_Modern	Cabecar-Reich	violetred2	7	PT-917Z	FALSE	FALSE	FALSE	FALSE	FALSE	FALSE	FALSE	FALSE	TRUE	FALSE	FALSE	FALSE	FALSE
Reich_2012_Nature	CentralAmerica_Modern	Cabecar-Reich	violetred2	7	PT-917W	FALSE	FALSE	FALSE	FALSE	FALSE	FALSE	FALSE	FALSE	TRUE	FALSE	FALSE	FALSE	FALSE
Reich_2012_Nature	CentralAmerica_Modern	Cabecar-Reich	violetred2	7	PT-918A	FALSE	FALSE	FALSE	FALSE	FALSE	FALSE	FALSE	FALSE	TRUE	FALSE	FALSE	FALSE	FALSE
Reich_2012_Nature	CentralAmerica_Modern	Cabecar-Reich	violetred2	7	PT-9183	FALSE	FALSE	FALSE	FALSE	FALSE	FALSE	FALSE	FALSE	TRUE	FALSE	FALSE	FALSE	FALSE
Reich_2012_Nature	CentralAmerica_Modern	Cabecar-Reich	violetred2	7	PT-918J	FALSE	FALSE	FALSE	FALSE	FALSE	FALSE	FALSE	FALSE	TRUE	FALSE	FALSE	FALSE	FALSE
Reich_2012_Nature	CentralAmerica_Modern	Cabecar-Reich	violetred2	7	PT-918M	FALSE	FALSE	FALSE	FALSE	FALSE	FALSE	FALSE	FALSE	TRUE	FALSE	FALSE	FALSE	FALSE
Reich_2012_Nature	CentralAmerica_Modern	Cabecar-Reich	violetred2	7	PT-917R	FALSE	FALSE	FALSE	FALSE	FALSE	FALSE	FALSE	FALSE	TRUE	FALSE	FALSE	FALSE	FALSE
Reich_2012_Nature	CentralAmerica_Modern	Cabecar-Reich	violetred2	7	PT-917O	FALSE	FALSE	FALSE	FALSE	FALSE	FALSE	FALSE	FALSE	TRUE	FALSE	FALSE	FALSE	FALSE
Reich_2012_Nature	CentralAmerica_Modern	Cabecar-Reich	violetred2	7	PT-918H	FALSE	FALSE	FALSE	FALSE	FALSE	FALSE	FALSE	FALSE	TRUE	FALSE	FALSE	FALSE	FALSE
Reich_2012_Nature	CentralAmerica_Modern	Cabecar-Reich	violetred2	7	PT-918L	FALSE	FALSE	FALSE	FALSE	FALSE	FALSE	FALSE	FALSE	TRUE	FALSE	FALSE	FALSE	FALSE
Reich_2012_Nature	CentralAmerica_Modern	Cabecar-Reich	violetred2	7	PT-917P	FALSE	FALSE	FALSE	FALSE	FALSE	FALSE	FALSE	FALSE	TRUE	FALSE	FALSE	FALSE	FALSE
Reich_2012_Nature	CentralAmerica_Modern	Cabecar-Reich	violetred2	7	PT-917V	FALSE	FALSE	FALSE	FALSE	FALSE	FALSE	FALSE	FALSE	TRUE	FALSE	FALSE	FALSE	FALSE
Reich_2012_Nature	CentralAmerica_Modern	Cabecar-Reich	violetred2	7	PT-9185	FALSE	FALSE	FALSE	FALSE	FALSE	FALSE	FALSE	FALSE	TRUE	FALSE	FALSE	FALSE	FALSE
Reich_2012_Nature	CentralAmerica_Modern	Cabecar-Reich	violetred2	7	PT-917M	FALSE	FALSE	FALSE	FALSE	FALSE	FALSE	FALSE	FALSE	TRUE	FALSE	FALSE	FALSE	FALSE
Reich_2012_Nature	CentralAmerica_Modern	Cabecar-Reich	violetred2	7	PT-9184	FALSE	FALSE	FALSE	FALSE	FALSE	FALSE	FALSE	FALSE	TRUE	FALSE	FALSE	FALSE	FALSE
Reich_2012_Nature	CentralAmerica_Modern	Cabecar-Reich	violetred2	7	PT-917L	FALSE	FALSE	FALSE	FALSE	FALSE	FALSE	FALSE	FALSE	TRUE	FALSE	FALSE	FALSE	FALSE
Reich_2012_Nature	CentralAmerica_Modern	Chorotega-Reich	violetred2	8	PT-918Z	FALSE	FALSE	FALSE	FALSE	FALSE	FALSE	FALSE	FALSE	TRUE	FALSE	FALSE	FALSE	FALSE
Reich_2012_Nature	CentralAmerica_Modern	Guaymi-Reich	violetred2	9	PT-917E	FALSE	FALSE	FALSE	FALSE	FALSE	FALSE	FALSE	FALSE	TRUE	FALSE	FALSE	FALSE	FALSE
Reich_2012_Nature	CentralAmerica_Modern	Guaymi-Reich	violetred2	9	PT-917H	FALSE	FALSE	FALSE	FALSE	FALSE	FALSE	FALSE	FALSE	TRUE	FALSE	FALSE	FALSE	FALSE
Reich_2012_Nature	CentralAmerica_Modern	Guaymi-Reich	violetred2	9	PT-917I	FALSE	FALSE	FALSE	FALSE	FALSE	FALSE	FALSE	FALSE	TRUE	FALSE	FALSE	FALSE	FALSE
Reich_2012_Nature	CentralAmerica_Modern	Guaymi-Reich	violetred2	9	PT-917F	FALSE	FALSE	FALSE	FALSE	FALSE	FALSE	FALSE	FALSE	TRUE	FALSE	FALSE	FALSE	FALSE
Reich_2012_Nature	CentralAmerica_Modern	Guaymi-Reich	violetred2	9	PT-917G	FALSE	FALSE	FALSE	FALSE	FALSE	FALSE	FALSE	FALSE	TRUE	FALSE	FALSE	FALSE	FALSE
Reich_2012_Nature	CentralAmerica_Modern	Huetar-Reich	violetred2	10	PT-9193	FALSE	FALSE	FALSE	FALSE	FALSE	FALSE	FALSE	FALSE	TRUE	FALSE	FALSE	FALSE	FALSE
Reich_2012_Nature	CentralAmerica_Modern	Kaqchikel-Reich	violetred2	11	PT-9148	FALSE	FALSE	FALSE	FALSE	FALSE	FALSE	FALSE	FALSE	TRUE	FALSE	FALSE	FALSE	FALSE
Reich_2012_Nature	CentralAmerica_Modern	Kaqchikel-Reich	violetred2	11	PT-9172	FALSE	FALSE	FALSE	FALSE	FALSE	FALSE	FALSE	FALSE	TRUE	FALSE	FALSE	FALSE	FALSE
Reich_2012_Nature	CentralAmerica_Modern	Kaqchikel-Reich	violetred2	11	PT-9179	FALSE	FALSE	FALSE	FALSE	FALSE	FALSE	FALSE	FALSE	TRUE	FALSE	FALSE	FALSE	FALSE
Reich_2012_Nature	CentralAmerica_Modern	Kaqchikel-Reich	violetred2	11	PT-917C	FALSE	FALSE	FALSE	FALSE	FALSE	FALSE	FALSE	FALSE	TRUE	FALSE	FALSE	FALSE	FALSE
Reich_2012_Nature	CentralAmerica_Modern	Kaqchikel-Reich	violetred2	11	PT-9174	FALSE	FALSE	FALSE	FALSE	FALSE	FALSE	FALSE	FALSE	TRUE	FALSE	FALSE	FALSE	FALSE
Reich_2012_Nature	CentralAmerica_Modern	Kaqchikel-Reich	violetred2	11	PT-9176	FALSE	FALSE	FALSE	FALSE	FALSE	FALSE	FALSE	FALSE	TRUE	FALSE	FALSE	FALSE	FALSE
Reich_2012_Nature	CentralAmerica_Modern	Kaqchikel-Reich	violetred2	11	PT-917A	FALSE	FALSE	FALSE	FALSE	FALSE	FALSE	FALSE	FALSE	TRUE	FALSE	FALSE	FALSE	FALSE
Reich_2012_Nature	CentralAmerica_Modern	Kaqchikel-Reich	violetred2	11	PT-916Z	FALSE	FALSE	FALSE	FALSE	FALSE	FALSE	FALSE	FALSE	TRUE	FALSE	FALSE	FALSE	FALSE
Reich_2012_Nature	CentralAmerica_Modern	Kaqchikel-Reich	violetred2	11	PT-917B	FALSE	FALSE	FALSE	FALSE	FALSE	FALSE	FALSE	FALSE	TRUE	FALSE	FALSE	FALSE	FALSE
Reich_2012_Nature	CentralAmerica_Modern	Kaqchikel-Reich	violetred2	11	PT-9143	FALSE	FALSE	FALSE	FALSE	FALSE	FALSE	FALSE	FALSE	TRUE	FALSE	FALSE	FALSE	FALSE
Reich_2012_Nature	CentralAmerica_Modern	Kaqchikel-Reich	violetred2	11	PT-9173	FALSE	FALSE	FALSE	FALSE	FALSE	FALSE	FALSE	FALSE	TRUE	FALSE	FALSE	FALSE	FALSE
Reich_2012_Nature	CentralAmerica_Modern	Kaqchikel-Reich	violetred2	11	PT-9171	FALSE	FALSE	FALSE	FALSE	FALSE	FALSE	FALSE	FALSE	TRUE	FALSE	FALSE	FALSE	FALSE
Reich_2012_Nature	CentralAmerica_Modern	Kaqchikel-Reich	violetred2	11	PT-9147	FALSE	FALSE	FALSE	FALSE	FALSE	FALSE	FALSE	FALSE	TRUE	FALSE	FALSE	FALSE	FALSE
Reich_2012_Nature	CentralAmerica_Modern	Maleku-Reich	violetred2	12	PT-9198	FALSE	FALSE	FALSE	FALSE	FALSE	FALSE	FALSE	FALSE	TRUE	FALSE	FALSE	FALSE	FALSE
Reich_2012_Nature	CentralAmerica_Modern	Maleku-Reich	violetred2	12	PT-919B	FALSE	FALSE	FALSE	FALSE	FALSE	FALSE	FALSE	FALSE	TRUE	FALSE	FALSE	FALSE	FALSE
Reich_2012_Nature	CentralAmerica_Modern	Maleku-Reich	violetred2	12	PT-9199	FALSE	FALSE	FALSE	FALSE	FALSE	FALSE	FALSE	FALSE	TRUE	FALSE	FALSE	FALSE	FALSE
Reich_2012_Nature	CentralAmerica_Modern	Maya1-Reich	violetred2	1	Maya_4037_042737	FALSE	FALSE	FALSE	FALSE	FALSE	FALSE	FALSE	FALSE	TRUE	FALSE	FALSE	FALSE	FALSE
Reich_2012_Nature	CentralAmerica_Modern	Maya1-Reich	violetred2	1	Maya_4031_041731	FALSE	FALSE	FALSE	FALSE	FALSE	FALSE	FALSE	FALSE	TRUE	FALSE	FALSE	FALSE	FALSE
Reich_2012_Nature	CentralAmerica_Modern	Maya1-Reich	violetred2	1	Maya_4016_041716	FALSE	FALSE	FALSE	FALSE	FALSE	FALSE	FALSE	FALSE	TRUE	FALSE	FALSE	FALSE	FALSE
Reich_2012_Nature	CentralAmerica_Modern	Maya1-Reich	violetred2	1	Maya_4034_042734	FALSE	FALSE	FALSE	FALSE	FALSE	FALSE	FALSE	FALSE	TRUE	FALSE	FALSE	FALSE	FALSE
Reich_2012_Nature	CentralAmerica_Modern	Maya1-Reich	violetred2	1	Maya_4026_042726	FALSE	FALSE	FALSE	FALSE	FALSE	FALSE	FALSE	FALSE	TRUE	FALSE	FALSE	FALSE	FALSE
Reich_2012_Nature	CentralAmerica_Modern	Maya1-Reich	violetred2	1	Maya_4017_041717	FALSE	FALSE	FALSE	FALSE	FALSE	FALSE	FALSE	FALSE	TRUE	FALSE	FALSE	FALSE	FALSE
Reich_2012_Nature	CentralAmerica_Modern	Maya1-Reich	violetred2	1	Maya_4037_041737	FALSE	FALSE	FALSE	FALSE	FALSE	FALSE	FALSE	FALSE	TRUE	FALSE	FALSE	FALSE	FALSE
Reich_2012_Nature	CentralAmerica_Modern	Maya1-Reich	violetred2	1	Maya_4003_041703	FALSE	FALSE	FALSE	FALSE	FALSE	FALSE	FALSE	FALSE	TRUE	FALSE	FALSE	FALSE	FALSE
Reich_2012_Nature	CentralAmerica_Modern	Maya1-Reich	violetred2	1	Maya_4014_041714	FALSE	FALSE	FALSE	FALSE	FALSE	FALSE	FALSE	FALSE	TRUE	FALSE	FALSE	FALSE	FALSE
Reich_2012_Nature	CentralAmerica_Modern	Maya1-Reich	violetred2	1	Maya_4018_041718	FALSE	FALSE	FALSE	FALSE	FALSE	FALSE	FALSE	FALSE	TRUE	FALSE	FALSE	FALSE	FALSE
Reich_2012_Nature	CentralAmerica_Modern	Maya1-Reich	violetred2	1	Maya_4032_041732	FALSE	FALSE	FALSE	FALSE	FALSE	FALSE	FALSE	FALSE	TRUE	FALSE	FALSE	FALSE	FALSE
Reich_2012_Nature	CentralAmerica_Modern	Maya1-Reich	violetred2	1	Maya_4017_042717	FALSE	FALSE	FALSE	FALSE	FALSE	FALSE	FALSE	FALSE	TRUE	FALSE	FALSE	FALSE	FALSE
Reich_2012_Nature	CentralAmerica_Modern	Maya1-Reich	violetred2	1	Maya_4016_042716	FALSE	FALSE	FALSE	FALSE	FALSE	FALSE	FALSE	FALSE	TRUE	FALSE	FALSE	FALSE	FALSE
Reich_2012_Nature	CentralAmerica_Modern	Maya1-Reich	violetred2	1	Maya_4032_042732	FALSE	FALSE	FALSE	FALSE	FALSE	FALSE	FALSE	FALSE	TRUE	FALSE	FALSE	FALSE	FALSE
Reich_2012_Nature	CentralAmerica_Modern	Maya1-Reich	violetred2	1	Maya_4012_042712	FALSE	FALSE	FALSE	FALSE	FALSE	FALSE	FALSE	FALSE	TRUE	FALSE	FALSE	FALSE	FALSE
Reich_2012_Nature	CentralAmerica_Modern	Maya1-Reich	violetred2	1	Maya_4003_042703	FALSE	FALSE	FALSE	FALSE	FALSE	FALSE	FALSE	FALSE	TRUE	FALSE	FALSE	FALSE	FALSE
Reich_2012_Nature	CentralAmerica_Modern	Maya1-Reich	violetred2	1	Maya_4009_041709	FALSE	FALSE	FALSE	FALSE	FALSE	FALSE	FALSE	FALSE	TRUE	FALSE	FALSE	FALSE	FALSE
Reich_2012_Nature	CentralAmerica_Modern	Maya1-Reich	violetred2	1	Maya_4014_042714	FALSE	FALSE	FALSE	FALSE	FALSE	FALSE	FALSE	FALSE	TRUE	FALSE	FALSE	FALSE	FALSE
Reich_2012_Nature	CentralAmerica_Modern	Maya1-Reich	violetred2	1	Maya_4018_042718	FALSE	FALSE	FALSE	FALSE	FALSE	FALSE	FALSE	FALSE	TRUE	FALSE	FALSE	FALSE	FALSE
Reich_2012_Nature	CentralAmerica_Modern	Maya1-Reich	violetred2	1	Maya_4012_041712	FALSE	FALSE	FALSE	FALSE	FALSE	FALSE	FALSE	FALSE	TRUE	FALSE	FALSE	FALSE	FALSE
Reich_2012_Nature	CentralAmerica_Modern	Maya2-Reich	violetred2	1	Maya_4010_042710	FALSE	FALSE	FALSE	FALSE	FALSE	FALSE	FALSE	FALSE	TRUE	FALSE	FALSE	FALSE	FALSE
Reich_2012_Nature	CentralAmerica_Modern	Maya2-Reich	violetred2	1	Maya_4000_041700	FALSE	FALSE	FALSE	FALSE	FALSE	FALSE	FALSE	FALSE	TRUE	FALSE	FALSE	FALSE	FALSE
Reich_2012_Nature	CentralAmerica_Modern	Maya2-Reich	violetred2	1	Maya_4010_c_041710_c	FALSE	FALSE	FALSE	FALSE	FALSE	FALSE	FALSE	FALSE	TRUE	FALSE	FALSE	FALSE	FALSE
Reich_2012_Nature	CentralAmerica_Modern	Maya2-Reich	violetred2	1	Maya_4005_041705	FALSE	FALSE	FALSE	FALSE	FALSE	FALSE	FALSE	FALSE	TRUE	FALSE	FALSE	FALSE	FALSE
Reich_2012_Nature	CentralAmerica_Modern	Maya2-Reich	violetred2	1	Maya_4025_041725	FALSE	FALSE	FALSE	FALSE	FALSE	FALSE	FALSE	FALSE	TRUE	FALSE	FALSE	FALSE	FALSE
Reich_2012_Nature	CentralAmerica_Modern	Maya2-Reich	violetred2	1	Maya_4009_042709	FALSE	FALSE	FALSE	FALSE	FALSE	FALSE	FALSE	FALSE	TRUE	FALSE	FALSE	FALSE	FALSE
Reich_2012_Nature	CentralAmerica_Modern	Maya2-Reich	violetred2	1	Maya_4011_042711	FALSE	FALSE	FALSE	FALSE	FALSE	FALSE	FALSE	FALSE	TRUE	FALSE	FALSE	FALSE	FALSE
Reich_2012_Nature	CentralAmerica_Modern	Maya2-Reich	violetred2	1	Maya_4001_042701	FALSE	FALSE	FALSE	FALSE	FALSE	FALSE	FALSE	FALSE	TRUE	FALSE	FALSE	FALSE	FALSE
Reich_2012_Nature	CentralAmerica_Modern	Maya2-Reich	violetred2	1	Maya_4026_041726	FALSE	FALSE	FALSE	FALSE	FALSE	FALSE	FALSE	FALSE	TRUE	FALSE	FALSE	FALSE	FALSE
Reich_2012_Nature	CentralAmerica_Modern	Maya2-Reich	violetred2	1	Maya_4000_042700	FALSE	FALSE	FALSE	FALSE	FALSE	FALSE	FALSE	FALSE	TRUE	FALSE	FALSE	FALSE	FALSE
Reich_2012_Nature	CentralAmerica_Modern	Maya2-Reich	violetred2	1	Maya_4005_042705	FALSE	FALSE	FALSE	FALSE	FALSE	FALSE	FALSE	FALSE	TRUE	FALSE	FALSE	FALSE	FALSE
Reich_2012_Nature	CentralAmerica_Modern	Maya2-Reich	violetred2	1	Maya_4025_042725	FALSE	FALSE	FALSE	FALSE	FALSE	FALSE	FALSE	FALSE	TRUE	FALSE	FALSE	FALSE	FALSE
Reich_2012_Nature	CentralAmerica_Modern	Mixe-Reich	violetred2	2	PT-9137	FALSE	FALSE	FALSE	FALSE	FALSE	FALSE	FALSE	FALSE	TRUE	FALSE	FALSE	FALSE	FALSE
Reich_2012_Nature	CentralAmerica_Modern	Mixe-Reich	violetred2	2	PT-912W	FALSE	FALSE	FALSE	FALSE	FALSE	FALSE	FALSE	FALSE	TRUE	FALSE	FALSE	FALSE	FALSE
Reich_2012_Nature	CentralAmerica_Modern	Mixe-Reich	violetred2	2	PT-912Z	FALSE	FALSE	FALSE	FALSE	FALSE	FALSE	FALSE	FALSE	TRUE	FALSE	FALSE	FALSE	FALSE
Reich_2012_Nature	CentralAmerica_Modern	Mixe-Reich	violetred2	2	PT-9134	FALSE	FALSE	FALSE	FALSE	FALSE	FALSE	FALSE	FALSE	TRUE	FALSE	FALSE	FALSE	FALSE
Reich_2012_Nature	CentralAmerica_Modern	Mixe-Reich	violetred2	2	PT-9133	FALSE	FALSE	FALSE	FALSE	FALSE	FALSE	FALSE	FALSE	TRUE	FALSE	FALSE	FALSE	FALSE
Reich_2012_Nature	CentralAmerica_Modern	Mixe-Reich	violetred2	2	PT-912V	FALSE	FALSE	FALSE	FALSE	FALSE	FALSE	FALSE	FALSE	TRUE	FALSE	FALSE	FALSE	FALSE
Reich_2012_Nature	CentralAmerica_Modern	Mixe-Reich	violetred2	2	PT-912X	FALSE	FALSE	FALSE	FALSE	FALSE	FALSE	FALSE	FALSE	TRUE	FALSE	FALSE	FALSE	FALSE
Reich_2012_Nature	CentralAmerica_Modern	Mixe-Reich	violetred2	2	PT-9135	FALSE	FALSE	FALSE	FALSE	FALSE	FALSE	FALSE	FALSE	TRUE	FALSE	FALSE	FALSE	FALSE
Reich_2012_Nature	CentralAmerica_Modern	Mixe-Reich	violetred2	2	PT-912Y	FALSE	FALSE	FALSE	FALSE	FALSE	FALSE	FALSE	FALSE	TRUE	FALSE	FALSE	FALSE	FALSE
Reich_2012_Nature	CentralAmerica_Modern	Mixe-Reich	violetred2	2	PT-9131	FALSE	FALSE	FALSE	FALSE	FALSE	FALSE	FALSE	FALSE	TRUE	FALSE	FALSE	FALSE	FALSE
Reich_2012_Nature	CentralAmerica_Modern	Mixe-Reich	violetred2	2	PT-912U	FALSE	FALSE	FALSE	FALSE	FALSE	FALSE	FALSE	FALSE	TRUE	FALSE	FALSE	FALSE	FALSE
Reich_2012_Nature	CentralAmerica_Modern	Mixe-Reich	violetred2	2	PT-9139	FALSE	FALSE	FALSE	FALSE	FALSE	FALSE	FALSE	FALSE	TRUE	FALSE	FALSE	FALSE	FALSE
Reich_2012_Nature	CentralAmerica_Modern	Mixe-Reich	violetred2	2	PT-912T	FALSE	FALSE	FALSE	FALSE	FALSE	FALSE	FALSE	FALSE	TRUE	FALSE	FALSE	FALSE	FALSE
Reich_2012_Nature	CentralAmerica_Modern	Mixe-Reich	violetred2	2	PT-9136	FALSE	FALSE	FALSE	FALSE	FALSE	FALSE	FALSE	FALSE	TRUE	FALSE	FALSE	FALSE	FALSE
Reich_2012_Nature	CentralAmerica_Modern	Mixe-Reich	violetred2	2	PT-913C	FALSE	FALSE	FALSE	FALSE	FALSE	FALSE	FALSE	FALSE	TRUE	FALSE	FALSE	FALSE	FALSE
Reich_2012_Nature	CentralAmerica_Modern	Mixe-Reich	violetred2	2	PT-913B	FALSE	FALSE	FALSE	FALSE	FALSE	FALSE	FALSE	FALSE	TRUE	FALSE	FALSE	FALSE	FALSE
Reich_2012_Nature	CentralAmerica_Modern	Mixe-Reich	violetred2	2	PT-9132	FALSE	FALSE	FALSE	FALSE	FALSE	FALSE	FALSE	FALSE	TRUE	FALSE	FALSE	FALSE	FALSE
Reich_2012_Nature	CentralAmerica_Modern	Mixtec-Reich	violetred2	3	PT-912Q	FALSE	FALSE	FALSE	FALSE	FALSE	FALSE	FALSE	FALSE	TRUE	FALSE	FALSE	FALSE	FALSE
Reich_2012_Nature	CentralAmerica_Modern	Mixtec-Reich	violetred2	3	PT-912R	FALSE	FALSE	FALSE	FALSE	FALSE	FALSE	FALSE	FALSE	TRUE	FALSE	FALSE	FALSE	FALSE
Reich_2012_Nature	CentralAmerica_Modern	Mixtec-Reich	violetred2	3	PT-912P	FALSE	FALSE	FALSE	FALSE	FALSE	FALSE	FALSE	FALSE	TRUE	FALSE	FALSE	FALSE	FALSE
Reich_2012_Nature	CentralAmerica_Modern	Mixtec-Reich	violetred2	3	PT-912N	FALSE	FALSE	FALSE	FALSE	FALSE	FALSE	FALSE	FALSE	TRUE	FALSE	FALSE	FALSE	FALSE
Reich_2012_Nature	CentralAmerica_Modern	Mixtec-Reich	violetred2	3	PT-912O	FALSE	FALSE	FALSE	FALSE	FALSE	FALSE	FALSE	FALSE	TRUE	FALSE	FALSE	FALSE	FALSE
Reich_2012_Nature	CentralAmerica_Modern	Purepecha-Reich	violetred2	13	PT-GLHG	FALSE	FALSE	FALSE	FALSE	FALSE	FALSE	FALSE	FALSE	TRUE	FALSE	FALSE	FALSE	FALSE
Reich_2012_Nature	CentralAmerica_Modern	Teribe-Reich	violetred2	14	PT-918P	FALSE	FALSE	FALSE	FALSE	FALSE	FALSE	FALSE	FALSE	TRUE	FALSE	FALSE	FALSE	FALSE
Reich_2012_Nature	CentralAmerica_Modern	Teribe-Reich	violetred2	14	PT-918Q	FALSE	FALSE	FALSE	FALSE	FALSE	FALSE	FALSE	FALSE	TRUE	FALSE	FALSE	FALSE	FALSE
Reich_2012_Nature	CentralAmerica_Modern	Teribe-Reich	violetred2	14	PT-918O	FALSE	FALSE	FALSE	FALSE	FALSE	FALSE	FALSE	FALSE	TRUE	FALSE	FALSE	FALSE	FALSE
Reich_2012_Nature	CentralAmerica_Modern	Zapotec1-Reich	violetred2	5	PT-913I	FALSE	FALSE	FALSE	FALSE	FALSE	FALSE	FALSE	FALSE	TRUE	FALSE	FALSE	FALSE	FALSE
Reich_2012_Nature	CentralAmerica_Modern	Zapotec1-Reich	violetred2	5	PT-913U	FALSE	FALSE	FALSE	FALSE	FALSE	FALSE	FALSE	FALSE	TRUE	FALSE	FALSE	FALSE	FALSE
Reich_2012_Nature	CentralAmerica_Modern	Zapotec1-Reich	violetred2	5	PT-913Q	FALSE	FALSE	FALSE	FALSE	FALSE	FALSE	FALSE	FALSE	TRUE	FALSE	FALSE	FALSE	FALSE
Reich_2012_Nature	CentralAmerica_Modern	Zapotec1-Reich	violetred2	5	PT-9142	FALSE	FALSE	FALSE	FALSE	FALSE	FALSE	FALSE	FALSE	TRUE	FALSE	FALSE	FALSE	FALSE
Reich_2012_Nature	CentralAmerica_Modern	Zapotec1-Reich	violetred2	5	PT-913Y	FALSE	FALSE	FALSE	FALSE	FALSE	FALSE	FALSE	FALSE	TRUE	FALSE	FALSE	FALSE	FALSE
Reich_2012_Nature	CentralAmerica_Modern	Zapotec1-Reich	violetred2	5	PT-913W	FALSE	FALSE	FALSE	FALSE	FALSE	FALSE	FALSE	FALSE	TRUE	FALSE	FALSE	FALSE	FALSE
Reich_2012_Nature	CentralAmerica_Modern	Zapotec1-Reich	violetred2	5	PT-8ZVZ	FALSE	FALSE	FALSE	FALSE	FALSE	FALSE	FALSE	FALSE	TRUE	FALSE	FALSE	FALSE	FALSE
Reich_2012_Nature	CentralAmerica_Modern	Zapotec1-Reich	violetred2	5	PT-913F	FALSE	FALSE	FALSE	FALSE	FALSE	FALSE	FALSE	FALSE	TRUE	FALSE	FALSE	FALSE	FALSE
Reich_2012_Nature	CentralAmerica_Modern	Zapotec1-Reich	violetred2	5	PT-913J	FALSE	FALSE	FALSE	FALSE	FALSE	FALSE	FALSE	FALSE	TRUE	FALSE	FALSE	FALSE	FALSE
Reich_2012_Nature	CentralAmerica_Modern	Zapotec1-Reich	violetred2	5	PT-913V	FALSE	FALSE	FALSE	FALSE	FALSE	FALSE	FALSE	FALSE	TRUE	FALSE	FALSE	FALSE	FALSE
Reich_2012_Nature	CentralAmerica_Modern	Zapotec1-Reich	violetred2	5	PT-9128	FALSE	FALSE	FALSE	FALSE	FALSE	FALSE	FALSE	FALSE	TRUE	FALSE	FALSE	FALSE	FALSE
Reich_2012_Nature	CentralAmerica_Modern	Zapotec1-Reich	violetred2	5	PT-913E	FALSE	FALSE	FALSE	FALSE	FALSE	FALSE	FALSE	FALSE	TRUE	FALSE	FALSE	FALSE	FALSE
Reich_2012_Nature	CentralAmerica_Modern	Zapotec1-Reich	violetred2	5	PT-8ZVS	FALSE	FALSE	FALSE	FALSE	FALSE	FALSE	FALSE	FALSE	TRUE	FALSE	FALSE	FALSE	FALSE
Reich_2012_Nature	CentralAmerica_Modern	Zapotec1-Reich	violetred2	5	PT-913Z	FALSE	FALSE	FALSE	FALSE	FALSE	FALSE	FALSE	FALSE	TRUE	FALSE	FALSE	FALSE	FALSE
Reich_2012_Nature	CentralAmerica_Modern	Zapotec1-Reich	violetred2	5	PT-8ZVR	FALSE	FALSE	FALSE	FALSE	FALSE	FALSE	FALSE	FALSE	TRUE	FALSE	FALSE	FALSE	FALSE
Reich_2012_Nature	CentralAmerica_Modern	Zapotec1-Reich	violetred2	5	PT-913G	FALSE	FALSE	FALSE	FALSE	FALSE	FALSE	FALSE	FALSE	TRUE	FALSE	FALSE	FALSE	FALSE
Reich_2012_Nature	CentralAmerica_Modern	Zapotec1-Reich	violetred2	5	PT-913S	FALSE	FALSE	FALSE	FALSE	FALSE	FALSE	FALSE	FALSE	TRUE	FALSE	FALSE	FALSE	FALSE
Reich_2012_Nature	CentralAmerica_Modern	Zapotec1-Reich	violetred2	5	PT-913D	FALSE	FALSE	FALSE	FALSE	FALSE	FALSE	FALSE	FALSE	TRUE	FALSE	FALSE	FALSE	FALSE
Reich_2012_Nature	CentralAmerica_Modern	Zapotec1-Reich	violetred2	5	PT-9141	FALSE	FALSE	FALSE	FALSE	FALSE	FALSE	FALSE	FALSE	TRUE	FALSE	FALSE	FALSE	FALSE
Reich_2012_Nature	CentralAmerica_Modern	Zapotec1-Reich	violetred2	5	PT-913X	FALSE	FALSE	FALSE	FALSE	FALSE	FALSE	FALSE	FALSE	TRUE	FALSE	FALSE	FALSE	FALSE
Reich_2012_Nature	CentralAmerica_Modern	Zapotec1-Reich	violetred2	5	PT-913R	FALSE	FALSE	FALSE	FALSE	FALSE	FALSE	FALSE	FALSE	TRUE	FALSE	FALSE	FALSE	FALSE
Reich_2012_Nature	CentralAmerica_Modern	Zapotec1-Reich	violetred2	5	PT-913H	FALSE	FALSE	FALSE	FALSE	FALSE	FALSE	FALSE	FALSE	TRUE	FALSE	FALSE	FALSE	FALSE
Reich_2012_Nature	CentralAmerica_Modern	Zapotec2-Reich	violetred2	5	Zapotec_20006_201606	FALSE	FALSE	FALSE	FALSE	FALSE	FALSE	FALSE	FALSE	TRUE	FALSE	FALSE	FALSE	FALSE
Reich_2012_Nature	CentralAmerica_Modern	Zapotec2-Reich	violetred2	5	Zapotec_20009_202609	FALSE	FALSE	FALSE	FALSE	FALSE	FALSE	FALSE	FALSE	TRUE	FALSE	FALSE	FALSE	FALSE
Reich_2012_Nature	CentralAmerica_Modern	Zapotec2-Reich	violetred2	5	Zapotec_20016_201516	FALSE	FALSE	FALSE	FALSE	FALSE	FALSE	FALSE	FALSE	TRUE	FALSE	FALSE	FALSE	FALSE
Reich_2012_Nature	CentralAmerica_Modern	Zapotec2-Reich	violetred2	5	Zapotec_20055_201555	FALSE	FALSE	FALSE	FALSE	FALSE	FALSE	FALSE	FALSE	TRUE	FALSE	FALSE	FALSE	FALSE
Reich_2012_Nature	CentralAmerica_Modern	Zapotec2-Reich	violetred2	5	Zapotec_20040_202540	FALSE	FALSE	FALSE	FALSE	FALSE	FALSE	FALSE	FALSE	TRUE	FALSE	FALSE	FALSE	FALSE
Reich_2012_Nature	CentralAmerica_Modern	Zapotec2-Reich	violetred2	5	Zapotec_20004_201604	FALSE	FALSE	FALSE	FALSE	FALSE	FALSE	FALSE	FALSE	TRUE	FALSE	FALSE	FALSE	FALSE
Reich_2012_Nature	CentralAmerica_Modern	Zapotec2-Reich	violetred2	5	Zapotec_20029_201529	FALSE	FALSE	FALSE	FALSE	FALSE	FALSE	FALSE	FALSE	TRUE	FALSE	FALSE	FALSE	FALSE
Reich_2012_Nature	CentralAmerica_Modern	Zapotec2-Reich	violetred2	5	Zapotec_20060_202560	FALSE	FALSE	FALSE	FALSE	FALSE	FALSE	FALSE	FALSE	TRUE	FALSE	FALSE	FALSE	FALSE
Reich_2012_Nature	CentralAmerica_Modern	Zapotec2-Reich	violetred2	5	Zapotec_20020_201520	FALSE	FALSE	FALSE	FALSE	FALSE	FALSE	FALSE	FALSE	TRUE	FALSE	FALSE	FALSE	FALSE
Reich_2012_Nature	CentralAmerica_Modern	Zapotec2-Reich	violetred2	5	Zapotec_20043_201543	FALSE	FALSE	FALSE	FALSE	FALSE	FALSE	FALSE	FALSE	TRUE	FALSE	FALSE	FALSE	FALSE
Reich_2012_Nature	CentralAmerica_Modern	Zapotec2-Reich	violetred2	5	Zapotec_20013_202513	FALSE	FALSE	FALSE	FALSE	FALSE	FALSE	FALSE	FALSE	TRUE	FALSE	FALSE	FALSE	FALSE
Reich_2012_Nature	CentralAmerica_Modern	Zapotec2-Reich	violetred2	5	Zapotec_20066_202566	FALSE	FALSE	FALSE	FALSE	FALSE	FALSE	FALSE	FALSE	TRUE	FALSE	FALSE	FALSE	FALSE
Reich_2012_Nature	CentralAmerica_Modern	Zapotec2-Reich	violetred2	5	Zapotec_20002_202602	FALSE	FALSE	FALSE	FALSE	FALSE	FALSE	FALSE	FALSE	TRUE	FALSE	FALSE	FALSE	FALSE
Reich_2012_Nature	CentralAmerica_Modern	Zapotec2-Reich	violetred2	5	Zapotec_20069_201569	FALSE	FALSE	FALSE	FALSE	FALSE	FALSE	FALSE	FALSE	TRUE	FALSE	FALSE	FALSE	FALSE
Reich_2012_Nature	CentralAmerica_Modern	Zapotec2-Reich	violetred2	5	Zapotec_20045_202545	FALSE	FALSE	FALSE	FALSE	FALSE	FALSE	FALSE	FALSE	TRUE	FALSE	FALSE	FALSE	FALSE
Reich_2012_Nature	CentralAmerica_Modern	Zapotec2-Reich	violetred2	5	Zapotec_20048_202548	FALSE	FALSE	FALSE	FALSE	FALSE	FALSE	FALSE	FALSE	TRUE	FALSE	FALSE	FALSE	FALSE
Reich_2012_Nature	CentralAmerica_Modern	Zapotec2-Reich	violetred2	5	Zapotec_20007_201607	FALSE	FALSE	FALSE	FALSE	FALSE	FALSE	FALSE	FALSE	TRUE	FALSE	FALSE	FALSE	FALSE
Reich_2012_Nature	CentralAmerica_Modern	Zapotec2-Reich	violetred2	5	Zapotec_20059_201559	FALSE	FALSE	FALSE	FALSE	FALSE	FALSE	FALSE	FALSE	TRUE	FALSE	FALSE	FALSE	FALSE
Reich_2012_Nature	CentralAmerica_Modern	Zapotec2-Reich	violetred2	5	Zapotec_20019_201519	FALSE	FALSE	FALSE	FALSE	FALSE	FALSE	FALSE	FALSE	TRUE	FALSE	FALSE	FALSE	FALSE
Reich_2012_Nature	CentralAmerica_Modern	Zapotec2-Reich	violetred2	5	Zapotec_20034_202534	FALSE	FALSE	FALSE	FALSE	FALSE	FALSE	FALSE	FALSE	TRUE	FALSE	FALSE	FALSE	FALSE
Reich_2012_Nature	CentralAmerica_Modern	Zapotec2-Reich	violetred2	5	Zapotec_20042_202542	FALSE	FALSE	FALSE	FALSE	FALSE	FALSE	FALSE	FALSE	TRUE	FALSE	FALSE	FALSE	FALSE
Reich_2012_Nature	CentralAndes_Modern	Aymara-Reich	darkorange3	4	PT-91Z7	FALSE	FALSE	FALSE	FALSE	FALSE	FALSE	FALSE	FALSE	TRUE	FALSE	FALSE	FALSE	FALSE
Reich_2012_Nature	CentralAndes_Modern	Aymara-Reich	darkorange3	4	PT-91YP	FALSE	FALSE	FALSE	FALSE	FALSE	FALSE	FALSE	FALSE	TRUE	FALSE	FALSE	FALSE	FALSE
Reich_2012_Nature	CentralAndes_Modern	Aymara-Reich	darkorange3	4	PT-91Z3	FALSE	FALSE	FALSE	FALSE	FALSE	FALSE	FALSE	FALSE	TRUE	FALSE	FALSE	FALSE	FALSE
Reich_2012_Nature	CentralAndes_Modern	Aymara-Reich	darkorange3	4	PT-91Z4	FALSE	FALSE	FALSE	FALSE	FALSE	FALSE	FALSE	FALSE	TRUE	FALSE	FALSE	FALSE	FALSE
Reich_2012_Nature	CentralAndes_Modern	Aymara-Reich	darkorange3	4	PT-91YQ	FALSE	FALSE	FALSE	FALSE	FALSE	FALSE	FALSE	FALSE	TRUE	FALSE	FALSE	FALSE	FALSE
Reich_2012_Nature	CentralAndes_Modern	Aymara-Reich	darkorange3	4	PT-8ZV9	FALSE	FALSE	FALSE	FALSE	FALSE	FALSE	FALSE	FALSE	TRUE	FALSE	FALSE	FALSE	FALSE
Reich_2012_Nature	CentralAndes_Modern	Aymara-Reich	darkorange3	4	PT-91YX	FALSE	FALSE	FALSE	FALSE	FALSE	FALSE	FALSE	FALSE	TRUE	FALSE	FALSE	FALSE	FALSE
Reich_2012_Nature	CentralAndes_Modern	Aymara-Reich	darkorange3	4	PT-91YT	FALSE	FALSE	FALSE	FALSE	FALSE	FALSE	FALSE	FALSE	TRUE	FALSE	FALSE	FALSE	FALSE
Reich_2012_Nature	CentralAndes_Modern	Aymara-Reich	darkorange3	4	PT-91Z2	FALSE	FALSE	FALSE	FALSE	FALSE	FALSE	FALSE	FALSE	TRUE	FALSE	FALSE	FALSE	FALSE
Reich_2012_Nature	CentralAndes_Modern	Aymara-Reich	darkorange3	4	PT-91YW	FALSE	FALSE	FALSE	FALSE	FALSE	FALSE	FALSE	FALSE	TRUE	FALSE	FALSE	FALSE	FALSE
Reich_2012_Nature	CentralAndes_Modern	Aymara-Reich	darkorange3	4	PT-91YV	FALSE	FALSE	FALSE	FALSE	FALSE	FALSE	FALSE	FALSE	TRUE	FALSE	FALSE	FALSE	FALSE
Reich_2012_Nature	CentralAndes_Modern	Aymara-Reich	darkorange3	4	PT-91YY	FALSE	FALSE	FALSE	FALSE	FALSE	FALSE	FALSE	FALSE	TRUE	FALSE	FALSE	FALSE	FALSE
Reich_2012_Nature	CentralAndes_Modern	Aymara-Reich	darkorange3	4	PT-91Z1	FALSE	FALSE	FALSE	FALSE	FALSE	FALSE	FALSE	FALSE	TRUE	FALSE	FALSE	FALSE	FALSE
Reich_2012_Nature	CentralAndes_Modern	Aymara-Reich	darkorange3	4	PT-91YN	FALSE	FALSE	FALSE	FALSE	FALSE	FALSE	FALSE	FALSE	TRUE	FALSE	FALSE	FALSE	FALSE
Reich_2012_Nature	CentralAndes_Modern	Aymara-Reich	darkorange3	4	PT-8ZV7	FALSE	FALSE	FALSE	FALSE	FALSE	FALSE	FALSE	FALSE	TRUE	FALSE	FALSE	FALSE	FALSE
Reich_2012_Nature	CentralAndes_Modern	Aymara-Reich	darkorange3	4	PT-91Z5	FALSE	FALSE	FALSE	FALSE	FALSE	FALSE	FALSE	FALSE	TRUE	FALSE	FALSE	FALSE	FALSE
Reich_2012_Nature	CentralAndes_Modern	Aymara-Reich	darkorange3	4	PT-8ZVB	FALSE	FALSE	FALSE	FALSE	FALSE	FALSE	FALSE	FALSE	TRUE	FALSE	FALSE	FALSE	FALSE
Reich_2012_Nature	CentralAndes_Modern	Aymara-Reich	darkorange3	4	PT-91YR	FALSE	FALSE	FALSE	FALSE	FALSE	FALSE	FALSE	FALSE	TRUE	FALSE	FALSE	FALSE	FALSE
Reich_2012_Nature	CentralAndes_Modern	Aymara-Reich	darkorange3	4	PT-91YU	FALSE	FALSE	FALSE	FALSE	FALSE	FALSE	FALSE	FALSE	TRUE	FALSE	FALSE	FALSE	FALSE
Reich_2012_Nature	CentralAndes_Modern	Aymara-Reich	darkorange3	4	PT-91YO	FALSE	FALSE	FALSE	FALSE	FALSE	FALSE	FALSE	FALSE	TRUE	FALSE	FALSE	FALSE	FALSE
Reich_2012_Nature	CentralAndes_Modern	Aymara-Reich	darkorange3	4	PT-8ZV8	FALSE	FALSE	FALSE	FALSE	FALSE	FALSE	FALSE	FALSE	TRUE	FALSE	FALSE	FALSE	FALSE
Reich_2012_Nature	CentralAndes_Modern	Aymara-Reich	darkorange3	4	PT-91YZ	FALSE	FALSE	FALSE	FALSE	FALSE	FALSE	FALSE	FALSE	TRUE	FALSE	FALSE	FALSE	FALSE
Reich_2012_Nature	CentralAndes_Modern	Aymara-Reich	darkorange3	4	PT-8ZVA	FALSE	FALSE	FALSE	FALSE	FALSE	FALSE	FALSE	FALSE	TRUE	FALSE	FALSE	FALSE	FALSE
Reich_2012_Nature	CentralAndes_Modern	Diaguita-Reich	darkorange3	5	PT-8ZV3	FALSE	FALSE	FALSE	FALSE	FALSE	FALSE	FALSE	FALSE	TRUE	FALSE	FALSE	FALSE	FALSE
Reich_2012_Nature	CentralAndes_Modern	Diaguita-Reich	darkorange3	5	PT-8ZV2	FALSE	FALSE	FALSE	FALSE	FALSE	FALSE	FALSE	FALSE	TRUE	FALSE	FALSE	FALSE	FALSE
Reich_2012_Nature	CentralAndes_Modern	Diaguita-Reich	darkorange3	5	PT-8ZV5	FALSE	FALSE	FALSE	FALSE	FALSE	FALSE	FALSE	FALSE	TRUE	FALSE	FALSE	FALSE	FALSE
Reich_2012_Nature	CentralAndes_Modern	Diaguita-Reich	darkorange3	5	PT-8ZV4	FALSE	FALSE	FALSE	FALSE	FALSE	FALSE	FALSE	FALSE	TRUE	FALSE	FALSE	FALSE	FALSE
Reich_2012_Nature	CentralAndes_Modern	Diaguita-Reich	darkorange3	5	PT-8ZV6	FALSE	FALSE	FALSE	FALSE	FALSE	FALSE	FALSE	FALSE	TRUE	FALSE	FALSE	FALSE	FALSE
Reich_2012_Nature	CentralAndes_Modern	Inga-Reich	darkorange3	6	PT-919J	FALSE	FALSE	FALSE	FALSE	FALSE	FALSE	FALSE	FALSE	TRUE	FALSE	FALSE	FALSE	FALSE
Reich_2012_Nature	CentralAndes_Modern	Inga-Reich	darkorange3	6	PT-91CO	FALSE	FALSE	FALSE	FALSE	FALSE	FALSE	FALSE	FALSE	TRUE	FALSE	FALSE	FALSE	FALSE
Reich_2012_Nature	CentralAndes_Modern	Inga-Reich	darkorange3	6	PT-91CM	FALSE	FALSE	FALSE	FALSE	FALSE	FALSE	FALSE	FALSE	TRUE	FALSE	FALSE	FALSE	FALSE
Reich_2012_Nature	CentralAndes_Modern	Inga-Reich	darkorange3	6	PT-91CL	FALSE	FALSE	FALSE	FALSE	FALSE	FALSE	FALSE	FALSE	TRUE	FALSE	FALSE	FALSE	FALSE
Reich_2012_Nature	CentralAndes_Modern	Inga-Reich	darkorange3	6	PT-91CN	FALSE	FALSE	FALSE	FALSE	FALSE	FALSE	FALSE	FALSE	TRUE	FALSE	FALSE	FALSE	FALSE
Reich_2012_Nature	CentralAndes_Modern	Inga-Reich	darkorange3	6	PT-91CP	FALSE	FALSE	FALSE	FALSE	FALSE	FALSE	FALSE	FALSE	TRUE	FALSE	FALSE	FALSE	FALSE
Reich_2012_Nature	CentralAndes_Modern	Inga-Reich	darkorange3	6	PT-91CS	FALSE	FALSE	FALSE	FALSE	FALSE	FALSE	FALSE	FALSE	TRUE	FALSE	FALSE	FALSE	FALSE
Reich_2012_Nature	CentralAndes_Modern	Inga-Reich	darkorange3	6	PT-919P	FALSE	FALSE	FALSE	FALSE	FALSE	FALSE	FALSE	FALSE	TRUE	FALSE	FALSE	FALSE	FALSE
Reich_2012_Nature	CentralAndes_Modern	Inga-Reich	darkorange3	6	PT-91CH	FALSE	FALSE	FALSE	FALSE	FALSE	FALSE	FALSE	FALSE	TRUE	FALSE	FALSE	FALSE	FALSE
Reich_2012_Nature	CentralAndes_Modern	Quechua-Reich	darkorange3	7	PT-91ZB	FALSE	FALSE	FALSE	FALSE	FALSE	FALSE	FALSE	FALSE	TRUE	FALSE	FALSE	FALSE	FALSE
Reich_2012_Nature	CentralAndes_Modern	Quechua-Reich	darkorange3	7	4254930439_A	FALSE	FALSE	FALSE	FALSE	FALSE	FALSE	FALSE	FALSE	TRUE	FALSE	FALSE	FALSE	FALSE
Reich_2012_Nature	CentralAndes_Modern	Quechua-Reich	darkorange3	7	PT-91ZG	FALSE	FALSE	FALSE	FALSE	FALSE	FALSE	FALSE	FALSE	TRUE	FALSE	FALSE	FALSE	FALSE
Reich_2012_Nature	CentralAndes_Modern	Quechua-Reich	darkorange3	7	PT-91ZM	FALSE	FALSE	FALSE	FALSE	FALSE	FALSE	FALSE	FALSE	TRUE	FALSE	FALSE	FALSE	FALSE
Reich_2012_Nature	CentralAndes_Modern	Quechua-Reich	darkorange3	7	4254930391_A	FALSE	FALSE	FALSE	FALSE	FALSE	FALSE	FALSE	FALSE	TRUE	FALSE	FALSE	FALSE	FALSE
Reich_2012_Nature	CentralAndes_Modern	Quechua-Reich	darkorange3	7	4254930482_A	FALSE	FALSE	FALSE	FALSE	FALSE	FALSE	FALSE	FALSE	TRUE	FALSE	FALSE	FALSE	FALSE
Reich_2012_Nature	CentralAndes_Modern	Quechua-Reich	darkorange3	7	PT-91Z9	FALSE	FALSE	FALSE	FALSE	FALSE	FALSE	FALSE	FALSE	TRUE	FALSE	FALSE	FALSE	FALSE
Reich_2012_Nature	CentralAndes_Modern	Quechua-Reich	darkorange3	7	4249815279_A	FALSE	FALSE	FALSE	FALSE	FALSE	FALSE	FALSE	FALSE	TRUE	FALSE	FALSE	FALSE	FALSE
Reich_2012_Nature	CentralAndes_Modern	Quechua-Reich	darkorange3	7	PT-91ZQ	FALSE	FALSE	FALSE	FALSE	FALSE	FALSE	FALSE	FALSE	TRUE	FALSE	FALSE	FALSE	FALSE
Reich_2012_Nature	CentralAndes_Modern	Quechua-Reich	darkorange3	7	PT-91ZI	FALSE	FALSE	FALSE	FALSE	FALSE	FALSE	FALSE	FALSE	TRUE	FALSE	FALSE	FALSE	FALSE
Reich_2012_Nature	CentralAndes_Modern	Quechua-Reich	darkorange3	7	PT-91ZR	FALSE	FALSE	FALSE	FALSE	FALSE	FALSE	FALSE	FALSE	TRUE	FALSE	FALSE	FALSE	FALSE
Reich_2012_Nature	CentralAndes_Modern	Quechua-Reich	darkorange3	7	PT-91ZJ	FALSE	FALSE	FALSE	FALSE	FALSE	FALSE	FALSE	FALSE	TRUE	FALSE	FALSE	FALSE	FALSE
Reich_2012_Nature	CentralAndes_Modern	Quechua-Reich	darkorange3	7	PT-91ZA	FALSE	FALSE	FALSE	FALSE	FALSE	FALSE	FALSE	FALSE	TRUE	FALSE	FALSE	FALSE	FALSE
Reich_2012_Nature	CentralAndes_Modern	Quechua-Reich	darkorange3	7	4254930451_A	FALSE	FALSE	FALSE	FALSE	FALSE	FALSE	FALSE	FALSE	TRUE	FALSE	FALSE	FALSE	FALSE
Reich_2012_Nature	CentralAndes_Modern	Quechua-Reich	darkorange3	7	4249815289_A	FALSE	FALSE	FALSE	FALSE	FALSE	FALSE	FALSE	FALSE	TRUE	FALSE	FALSE	FALSE	FALSE
Reich_2012_Nature	CentralAndes_Modern	Quechua-Reich	darkorange3	7	PT-91ZE	FALSE	FALSE	FALSE	FALSE	FALSE	FALSE	FALSE	FALSE	TRUE	FALSE	FALSE	FALSE	FALSE
Reich_2012_Nature	CentralAndes_Modern	Quechua-Reich	darkorange3	7	4254930534_A	FALSE	FALSE	FALSE	FALSE	FALSE	FALSE	FALSE	FALSE	TRUE	FALSE	FALSE	FALSE	FALSE
Reich_2012_Nature	CentralAndes_Modern	Quechua-Reich	darkorange3	7	4254930496_A	FALSE	FALSE	FALSE	FALSE	FALSE	FALSE	FALSE	FALSE	TRUE	FALSE	FALSE	FALSE	FALSE
Reich_2012_Nature	CentralAndes_Modern	Quechua-Reich	darkorange3	7	4249815297_A	FALSE	FALSE	FALSE	FALSE	FALSE	FALSE	FALSE	FALSE	TRUE	FALSE	FALSE	FALSE	FALSE
Reich_2012_Nature	CentralAndes_Modern	Quechua-Reich	darkorange3	7	4254930537_A	FALSE	FALSE	FALSE	FALSE	FALSE	FALSE	FALSE	FALSE	TRUE	FALSE	FALSE	FALSE	FALSE
Reich_2012_Nature	CentralAndes_Modern	Quechua-Reich	darkorange3	7	4254930355_A	FALSE	FALSE	FALSE	FALSE	FALSE	FALSE	FALSE	FALSE	TRUE	FALSE	FALSE	FALSE	FALSE
Reich_2012_Nature	CentralAndes_Modern	Quechua-Reich	darkorange3	7	4254930531_A	FALSE	FALSE	FALSE	FALSE	FALSE	FALSE	FALSE	FALSE	TRUE	FALSE	FALSE	FALSE	FALSE
Reich_2012_Nature	CentralAndes_Modern	Quechua-Reich	darkorange3	7	PT-91ZH	FALSE	FALSE	FALSE	FALSE	FALSE	FALSE	FALSE	FALSE	TRUE	FALSE	FALSE	FALSE	FALSE
Reich_2012_Nature	CentralAndes_Modern	Quechua-Reich	darkorange3	7	4254930455_A	FALSE	FALSE	FALSE	FALSE	FALSE	FALSE	FALSE	FALSE	TRUE	FALSE	FALSE	FALSE	FALSE
Reich_2012_Nature	CentralAndes_Modern	Quechua-Reich	darkorange3	7	4254930366_A	FALSE	FALSE	FALSE	FALSE	FALSE	FALSE	FALSE	FALSE	TRUE	FALSE	FALSE	FALSE	FALSE
Reich_2012_Nature	CentralAndes_Modern	Quechua-Reich	darkorange3	7	4254930365_A	FALSE	FALSE	FALSE	FALSE	FALSE	FALSE	FALSE	FALSE	TRUE	FALSE	FALSE	FALSE	FALSE
Reich_2012_Nature	CentralAndes_Modern	Quechua-Reich	darkorange3	7	PT-91Z8	FALSE	FALSE	FALSE	FALSE	FALSE	FALSE	FALSE	FALSE	TRUE	FALSE	FALSE	FALSE	FALSE
Reich_2012_Nature	CentralAndes_Modern	Quechua-Reich	darkorange3	7	PT-91ZO	FALSE	FALSE	FALSE	FALSE	FALSE	FALSE	FALSE	FALSE	TRUE	FALSE	FALSE	FALSE	FALSE
Reich_2012_Nature	CentralAndes_Modern	Quechua-Reich	darkorange3	7	4249815287_A	FALSE	FALSE	FALSE	FALSE	FALSE	FALSE	FALSE	FALSE	TRUE	FALSE	FALSE	FALSE	FALSE
Reich_2012_Nature	CentralAndes_Modern	Quechua-Reich	darkorange3	7	PT-91ZK	FALSE	FALSE	FALSE	FALSE	FALSE	FALSE	FALSE	FALSE	TRUE	FALSE	FALSE	FALSE	FALSE
Reich_2012_Nature	CentralAndes_Modern	Quechua-Reich	darkorange3	7	PT-91ZL	FALSE	FALSE	FALSE	FALSE	FALSE	FALSE	FALSE	FALSE	TRUE	FALSE	FALSE	FALSE	FALSE
Reich_2012_Nature	CentralAndes_Modern	Quechua-Reich	darkorange3	7	4254930581_A	FALSE	FALSE	FALSE	FALSE	FALSE	FALSE	FALSE	FALSE	TRUE	FALSE	FALSE	FALSE	FALSE
Reich_2012_Nature	CentralAndes_Modern	Quechua-Reich	darkorange3	7	4254930420_A	FALSE	FALSE	FALSE	FALSE	FALSE	FALSE	FALSE	FALSE	TRUE	FALSE	FALSE	FALSE	FALSE
Reich_2012_Nature	CentralAndes_Modern	Quechua-Reich	darkorange3	7	4254930367_A	FALSE	FALSE	FALSE	FALSE	FALSE	FALSE	FALSE	FALSE	TRUE	FALSE	FALSE	FALSE	FALSE
Reich_2012_Nature	CentralAndes_Modern	Quechua-Reich	darkorange3	7	PT-91ZN	FALSE	FALSE	FALSE	FALSE	FALSE	FALSE	FALSE	FALSE	TRUE	FALSE	FALSE	FALSE	FALSE
Reich_2012_Nature	CentralAndes_Modern	Quechua-Reich	darkorange3	7	4249815296_A	FALSE	FALSE	FALSE	FALSE	FALSE	FALSE	FALSE	FALSE	TRUE	FALSE	FALSE	FALSE	FALSE
Reich_2012_Nature	CentralAndes_Modern	Quechua-Reich	darkorange3	7	4249815288_A	FALSE	FALSE	FALSE	FALSE	FALSE	FALSE	FALSE	FALSE	TRUE	FALSE	FALSE	FALSE	FALSE
Reich_2012_Nature	CentralAndes_Modern	Quechua-Reich	darkorange3	7	PT-91ZC	FALSE	FALSE	FALSE	FALSE	FALSE	FALSE	FALSE	FALSE	TRUE	FALSE	FALSE	FALSE	FALSE
Reich_2012_Nature	CentralAndes_Modern	Quechua-Reich	darkorange3	7	PT-91ZP	FALSE	FALSE	FALSE	FALSE	FALSE	FALSE	FALSE	FALSE	TRUE	FALSE	FALSE	FALSE	FALSE
Reich_2012_Nature	CentralAndes_Modern	Quechua-Reich	darkorange3	7	4254930399_A	FALSE	FALSE	FALSE	FALSE	FALSE	FALSE	FALSE	FALSE	TRUE	FALSE	FALSE	FALSE	FALSE
Reich_2012_Nature	CentralChile_Modern	Hulliche-Reich	brown3	2	PT-8ZVD	FALSE	FALSE	FALSE	FALSE	FALSE	FALSE	FALSE	TRUE	TRUE	FALSE	FALSE	FALSE	FALSE
Reich_2012_Nature	CentralChile_Modern	Hulliche-Reich	brown3	2	PT-8ZVF	FALSE	FALSE	FALSE	FALSE	FALSE	FALSE	FALSE	TRUE	TRUE	FALSE	FALSE	FALSE	FALSE
Reich_2012_Nature	CentralChile_Modern	Hulliche-Reich	brown3	2	PT-8ZVG	FALSE	FALSE	FALSE	FALSE	FALSE	FALSE	FALSE	TRUE	TRUE	FALSE	FALSE	FALSE	FALSE
Reich_2012_Nature	CentralChile_Modern	Hulliche-Reich	brown3	2	PT-8ZVE	FALSE	FALSE	FALSE	FALSE	FALSE	FALSE	FALSE	TRUE	TRUE	FALSE	FALSE	FALSE	FALSE
Reich_2012_Nature	SouthernNorthAmerica_Modern	Pima-Reich	blueviolet	9	4254930060_A	FALSE	FALSE	FALSE	FALSE	FALSE	FALSE	FALSE	FALSE	TRUE	FALSE	FALSE	FALSE	FALSE
Reich_2012_Nature	SouthernNorthAmerica_Modern	Pima-Reich	blueviolet	9	4254930550_A	FALSE	FALSE	FALSE	FALSE	FALSE	FALSE	FALSE	FALSE	TRUE	FALSE	FALSE	FALSE	FALSE
Reich_2012_Nature	SouthernNorthAmerica_Modern	Pima-Reich	blueviolet	9	HGDP01051	FALSE	FALSE	FALSE	FALSE	FALSE	FALSE	FALSE	FALSE	TRUE	FALSE	FALSE	FALSE	FALSE
Reich_2012_Nature	SouthernNorthAmerica_Modern	Pima-Reich	blueviolet	9	4254930343_A	FALSE	FALSE	FALSE	FALSE	FALSE	FALSE	FALSE	FALSE	TRUE	FALSE	FALSE	FALSE	FALSE
Reich_2012_Nature	SouthernNorthAmerica_Modern	Pima-Reich	blueviolet	9	4254930270_A	FALSE	FALSE	FALSE	FALSE	FALSE	FALSE	FALSE	FALSE	TRUE	FALSE	FALSE	FALSE	FALSE
Reich_2012_Nature	SouthernNorthAmerica_Modern	Pima-Reich	blueviolet	9	4254930244_A	FALSE	FALSE	FALSE	FALSE	FALSE	FALSE	FALSE	FALSE	TRUE	FALSE	FALSE	FALSE	FALSE
Reich_2012_Nature	SouthernNorthAmerica_Modern	Pima-Reich	blueviolet	9	4249815052_A	FALSE	FALSE	FALSE	FALSE	FALSE	FALSE	FALSE	FALSE	TRUE	FALSE	FALSE	FALSE	FALSE
Reich_2012_Nature	SouthernNorthAmerica_Modern	Pima-Reich	blueviolet	9	4249815114_A	FALSE	FALSE	FALSE	FALSE	FALSE	FALSE	FALSE	FALSE	TRUE	FALSE	FALSE	FALSE	FALSE
Reich_2012_Nature	SouthernNorthAmerica_Modern	Pima-Reich	blueviolet	9	4254930592_A	FALSE	FALSE	FALSE	FALSE	FALSE	FALSE	FALSE	FALSE	TRUE	FALSE	FALSE	FALSE	FALSE
Reich_2012_Nature	SouthernNorthAmerica_Modern	Pima-Reich	blueviolet	9	4254930566_A	FALSE	FALSE	FALSE	FALSE	FALSE	FALSE	FALSE	FALSE	TRUE	FALSE	FALSE	FALSE	FALSE
Reich_2012_Nature	SouthernNorthAmerica_Modern	Pima-Reich	blueviolet	9	4254930593_A	FALSE	FALSE	FALSE	FALSE	FALSE	FALSE	FALSE	FALSE	TRUE	FALSE	FALSE	FALSE	FALSE
Reich_2012_Nature	SouthernNorthAmerica_Modern	Pima-Reich	blueviolet	9	4254930178_A	FALSE	FALSE	FALSE	FALSE	FALSE	FALSE	FALSE	FALSE	TRUE	FALSE	FALSE	FALSE	FALSE
Reich_2012_Nature	SouthernNorthAmerica_Modern	Pima-Reich	blueviolet	9	4254930595_A	FALSE	FALSE	FALSE	FALSE	FALSE	FALSE	FALSE	FALSE	TRUE	FALSE	FALSE	FALSE	FALSE
Reich_2012_Nature	SouthernNorthAmerica_Modern	Pima-Reich	blueviolet	9	4254930364_A	FALSE	FALSE	FALSE	FALSE	FALSE	FALSE	FALSE	FALSE	TRUE	FALSE	FALSE	FALSE	FALSE
Reich_2012_Nature	SouthernNorthAmerica_Modern	Pima-Reich	blueviolet	9	4249815174_A	FALSE	FALSE	FALSE	FALSE	FALSE	FALSE	FALSE	FALSE	TRUE	FALSE	FALSE	FALSE	FALSE
Reich_2012_Nature	SouthernNorthAmerica_Modern	Pima-Reich	blueviolet	9	4249815138_A	FALSE	FALSE	FALSE	FALSE	FALSE	FALSE	FALSE	FALSE	TRUE	FALSE	FALSE	FALSE	FALSE
Reich_2012_Nature	SouthernNorthAmerica_Modern	Pima-Reich	blueviolet	9	4254930599_A	FALSE	FALSE	FALSE	FALSE	FALSE	FALSE	FALSE	FALSE	TRUE	FALSE	FALSE	FALSE	FALSE
Reich_2012_Nature	SouthernNorthAmerica_Modern	Pima-Reich	blueviolet	9	4254930065_A	FALSE	FALSE	FALSE	FALSE	FALSE	FALSE	FALSE	FALSE	TRUE	FALSE	FALSE	FALSE	FALSE
Reich_2012_Nature	SouthernNorthAmerica_Modern	Pima-Reich	blueviolet	9	4249815035_A	FALSE	FALSE	FALSE	FALSE	FALSE	FALSE	FALSE	FALSE	TRUE	FALSE	FALSE	FALSE	FALSE
Reich_2012_Nature	SouthernNorthAmerica_Modern	Pima-Reich	blueviolet	9	4254930269_A	FALSE	FALSE	FALSE	FALSE	FALSE	FALSE	FALSE	FALSE	TRUE	FALSE	FALSE	FALSE	FALSE
Reich_2012_Nature	SouthernNorthAmerica_Modern	Pima-Reich	blueviolet	9	4249815208_A	FALSE	FALSE	FALSE	FALSE	FALSE	FALSE	FALSE	FALSE	TRUE	FALSE	FALSE	FALSE	FALSE
Reich_2012_Nature	SouthernNorthAmerica_Modern	Pima-Reich	blueviolet	9	4249815024_A	FALSE	FALSE	FALSE	FALSE	FALSE	FALSE	FALSE	FALSE	TRUE	FALSE	FALSE	FALSE	FALSE
Reich_2012_Nature	SouthernNorthAmerica_Modern	Tepehuano-Reich	blueviolet	10	Tepehuano_10026_102726	FALSE	FALSE	FALSE	FALSE	FALSE	FALSE	FALSE	FALSE	TRUE	FALSE	FALSE	FALSE	FALSE
Reich_2012_Nature	SouthernNorthAmerica_Modern	Tepehuano-Reich	blueviolet	10	Tepehuano_10038_102738	FALSE	FALSE	FALSE	FALSE	FALSE	FALSE	FALSE	FALSE	TRUE	FALSE	FALSE	FALSE	FALSE
Reich_2012_Nature	SouthernNorthAmerica_Modern	Tepehuano-Reich	blueviolet	10	Tepehuano_10018_101718	FALSE	FALSE	FALSE	FALSE	FALSE	FALSE	FALSE	FALSE	TRUE	FALSE	FALSE	FALSE	FALSE
Reich_2012_Nature	SouthernNorthAmerica_Modern	Tepehuano-Reich	blueviolet	10	Tepehuano_10099_101799	FALSE	FALSE	FALSE	FALSE	FALSE	FALSE	FALSE	FALSE	TRUE	FALSE	FALSE	FALSE	FALSE
Reich_2012_Nature	SouthernNorthAmerica_Modern	Tepehuano-Reich	blueviolet	10	Tepehuano_10009_101709	FALSE	FALSE	FALSE	FALSE	FALSE	FALSE	FALSE	FALSE	TRUE	FALSE	FALSE	FALSE	FALSE
Reich_2012_Nature	SouthernNorthAmerica_Modern	Tepehuano-Reich	blueviolet	10	Tepehuano_10027_101727	FALSE	FALSE	FALSE	FALSE	FALSE	FALSE	FALSE	FALSE	TRUE	FALSE	FALSE	FALSE	FALSE
Reich_2012_Nature	SouthernNorthAmerica_Modern	Tepehuano-Reich	blueviolet	10	Tepehuano_10018_102718	FALSE	FALSE	FALSE	FALSE	FALSE	FALSE	FALSE	FALSE	TRUE	FALSE	FALSE	FALSE	FALSE
Reich_2012_Nature	SouthernNorthAmerica_Modern	Tepehuano-Reich	blueviolet	10	Tepehuano_10039_101739	FALSE	FALSE	FALSE	FALSE	FALSE	FALSE	FALSE	FALSE	TRUE	FALSE	FALSE	FALSE	FALSE
Reich_2012_Nature	SouthernNorthAmerica_Modern	Tepehuano-Reich	blueviolet	10	Tepehuano_10023_101723	FALSE	FALSE	FALSE	FALSE	FALSE	FALSE	FALSE	FALSE	TRUE	FALSE	FALSE	FALSE	FALSE
Reich_2012_Nature	SouthernNorthAmerica_Modern	Tepehuano-Reich	blueviolet	10	Tepehuano_10023_102723	FALSE	FALSE	FALSE	FALSE	FALSE	FALSE	FALSE	FALSE	TRUE	FALSE	FALSE	FALSE	FALSE
Reich_2012_Nature	SouthernNorthAmerica_Modern	Tepehuano-Reich	blueviolet	10	Tepehuano_10098_101798	FALSE	FALSE	FALSE	FALSE	FALSE	FALSE	FALSE	FALSE	TRUE	FALSE	FALSE	FALSE	FALSE
Reich_2012_Nature	SouthernNorthAmerica_Modern	Tepehuano-Reich	blueviolet	10	Tepehuano_10030_101730	FALSE	FALSE	FALSE	FALSE	FALSE	FALSE	FALSE	FALSE	TRUE	FALSE	FALSE	FALSE	FALSE
Reich_2012_Nature	SouthernNorthAmerica_Modern	Tepehuano-Reich	blueviolet	10	Tepehuano_10040_102740	FALSE	FALSE	FALSE	FALSE	FALSE	FALSE	FALSE	FALSE	TRUE	FALSE	FALSE	FALSE	FALSE
Reich_2012_Nature	SouthernNorthAmerica_Modern	Tepehuano-Reich	blueviolet	10	Tepehuano_10035_101735	FALSE	FALSE	FALSE	FALSE	FALSE	FALSE	FALSE	FALSE	TRUE	FALSE	FALSE	FALSE	FALSE
Reich_2012_Nature	SouthernNorthAmerica_Modern	Tepehuano-Reich	blueviolet	10	Tepehuano_10003_101703	FALSE	FALSE	FALSE	FALSE	FALSE	FALSE	FALSE	FALSE	TRUE	FALSE	FALSE	FALSE	FALSE
Reich_2012_Nature	SouthernNorthAmerica_Modern	Tepehuano-Reich	blueviolet	10	Tepehuano_10000_101700	FALSE	FALSE	FALSE	FALSE	FALSE	FALSE	FALSE	FALSE	TRUE	FALSE	FALSE	FALSE	FALSE
Reich_2012_Nature	SouthernNorthAmerica_Modern	Tepehuano-Reich	blueviolet	10	Tepehuano_10028_101728	FALSE	FALSE	FALSE	FALSE	FALSE	FALSE	FALSE	FALSE	TRUE	FALSE	FALSE	FALSE	FALSE
Reich_2012_Nature	SouthernNorthAmerica_Modern	Tepehuano-Reich	blueviolet	10	Tepehuano_10030_102730	FALSE	FALSE	FALSE	FALSE	FALSE	FALSE	FALSE	FALSE	TRUE	FALSE	FALSE	FALSE	FALSE
Reich_2012_Nature	SouthernNorthAmerica_Modern	Tepehuano-Reich	blueviolet	10	Tepehuano_10009_102709	FALSE	FALSE	FALSE	FALSE	FALSE	FALSE	FALSE	FALSE	TRUE	FALSE	FALSE	FALSE	FALSE
Reich_2012_Nature	SouthernNorthAmerica_Modern	Tepehuano-Reich	blueviolet	10	Tepehuano_10028_102728	FALSE	FALSE	FALSE	FALSE	FALSE	FALSE	FALSE	FALSE	TRUE	FALSE	FALSE	FALSE	FALSE
Reich_2012_Nature	SouthernNorthAmerica_Modern	Tepehuano-Reich	blueviolet	10	Tepehuano_10000_102700	FALSE	FALSE	FALSE	FALSE	FALSE	FALSE	FALSE	FALSE	TRUE	FALSE	FALSE	FALSE	FALSE
Reich_2012_Nature	SouthernNorthAmerica_Modern	Tepehuano-Reich	blueviolet	10	Tepehuano_10040_101740	FALSE	FALSE	FALSE	FALSE	FALSE	FALSE	FALSE	FALSE	TRUE	FALSE	FALSE	FALSE	FALSE
Reich_2012_Nature	SouthernNorthAmerica_Modern	Tepehuano-Reich	blueviolet	10	Tepehuano_10039_102739	FALSE	FALSE	FALSE	FALSE	FALSE	FALSE	FALSE	FALSE	TRUE	FALSE	FALSE	FALSE	FALSE
Reich_2012_Nature	SouthernNorthAmerica_Modern	Tepehuano-Reich	blueviolet	10	Tepehuano_10003_102703	FALSE	FALSE	FALSE	FALSE	FALSE	FALSE	FALSE	FALSE	TRUE	FALSE	FALSE	FALSE	FALSE
Reich_2012_Nature	SouthernNorthAmerica_Modern	Tepehuano-Reich	blueviolet	10	Tepehuano_10007_102807	FALSE	FALSE	FALSE	FALSE	FALSE	FALSE	FALSE	FALSE	TRUE	FALSE	FALSE	FALSE	FALSE
Reich_2012_Nature	SouthernNorthAmerica_Modern	Yaqui-Reich	blueviolet	11	PT-912H	FALSE	FALSE	FALSE	FALSE	FALSE	FALSE	FALSE	FALSE	TRUE	FALSE	FALSE	FALSE	FALSE
Reich_2012_Nature	SouthPatagonia_Modern	Chilote-Reich	brown3	4	PT-8ZXC	FALSE	FALSE	FALSE	FALSE	FALSE	FALSE	FALSE	TRUE	TRUE	FALSE	FALSE	FALSE	FALSE
Reich_2012_Nature	SouthPatagonia_Modern	Chilote-Reich	brown3	4	PT-8ZXE	FALSE	FALSE	FALSE	FALSE	FALSE	FALSE	FALSE	TRUE	TRUE	FALSE	FALSE	FALSE	FALSE
Reich_2012_Nature	SouthPatagonia_Modern	Chilote-Reich	brown3	4	PT-8ZXF	FALSE	FALSE	FALSE	FALSE	FALSE	FALSE	FALSE	TRUE	TRUE	FALSE	FALSE	FALSE	FALSE
Reich_2012_Nature	SouthPatagonia_Modern	Chilote-Reich	brown3	4	PT-8ZXA	FALSE	FALSE	FALSE	FALSE	FALSE	FALSE	FALSE	TRUE	TRUE	FALSE	FALSE	FALSE	FALSE
Reich_2012_Nature	SouthPatagonia_Modern	Chilote-Reich	brown3	4	PT-8ZX8	FALSE	FALSE	FALSE	FALSE	FALSE	FALSE	FALSE	TRUE	TRUE	FALSE	FALSE	FALSE	FALSE
Reich_2012_Nature	SouthPatagonia_Modern	Chilote-Reich	brown3	4	PT-8ZXB	FALSE	FALSE	FALSE	FALSE	FALSE	FALSE	FALSE	TRUE	TRUE	FALSE	FALSE	FALSE	FALSE
Reich_2012_Nature	SouthPatagonia_Modern	Chilote-Reich	brown3	4	PT-8ZXD	FALSE	FALSE	FALSE	FALSE	FALSE	FALSE	FALSE	TRUE	TRUE	FALSE	FALSE	FALSE	FALSE
Reich_2012_Nature	SouthPatagonia_Modern	Chilote-Reich	brown3	4	PT-8ZXG	FALSE	FALSE	FALSE	FALSE	FALSE	FALSE	FALSE	TRUE	TRUE	FALSE	FALSE	FALSE	FALSE
Reich_2012_Nature	SouthPatagonia_Modern	Chono-Reich	brown3	5	PT-8ZXH	FALSE	FALSE	FALSE	FALSE	FALSE	FALSE	FALSE	TRUE	TRUE	FALSE	FALSE	FALSE	FALSE
Reich_2012_Nature	SouthPatagonia_Modern	Chono-Reich	brown3	5	PT-8ZXK	FALSE	FALSE	FALSE	FALSE	FALSE	FALSE	FALSE	TRUE	TRUE	FALSE	FALSE	FALSE	FALSE
Reich_2012_Nature	SouthPatagonia_Modern	Chono-Reich	brown3	5	PT-8ZXL	FALSE	FALSE	FALSE	FALSE	FALSE	FALSE	FALSE	TRUE	TRUE	FALSE	FALSE	FALSE	FALSE
Reich_2012_Nature	SouthPatagonia_Modern	Chono-Reich	brown3	5	PT-8ZXI	FALSE	FALSE	FALSE	FALSE	FALSE	FALSE	FALSE	TRUE	TRUE	FALSE	FALSE	FALSE	FALSE
Reich_2012_Nature	SouthPatagonia_Modern	Yaghan-Reich	brown3	7	PT-91YI	FALSE	FALSE	FALSE	FALSE	FALSE	FALSE	FALSE	TRUE	TRUE	FALSE	FALSE	FALSE	FALSE
Reich_2012_Nature	SouthPatagonia_Modern	Yaghan-Reich	brown3	7	PT-91YL	FALSE	FALSE	FALSE	FALSE	FALSE	FALSE	FALSE	TRUE	TRUE	FALSE	FALSE	FALSE	FALSE
Reich_2012_Nature	SouthPatagonia_Modern	Yaghan-Reich	brown3	7	PT-91YJ	FALSE	FALSE	FALSE	FALSE	FALSE	FALSE	FALSE	TRUE	TRUE	FALSE	FALSE	FALSE	FALSE
Reich_2012_Nature	SouthPatagonia_Modern	Yaghan-Reich	brown3	7	PT-91YM	FALSE	FALSE	FALSE	FALSE	FALSE	FALSE	FALSE	TRUE	TRUE	FALSE	FALSE	FALSE	FALSE
Salazar_2023_SciAdv	CentralAndes_LateHorizon_LH	Peru_CasaConcha2_LH.Capt	darkorange2	4	CCA-7-2	FALSE	FALSE	FALSE	FALSE	TRUE	TRUE	TRUE	TRUE	TRUE	FALSE	TRUE	FALSE	FALSE
Salazar_2023_SciAdv	CentralAndes_LateHorizon_LH	Peru_CasaConcha2_LH.Capt	darkorange2	4	CCA-5-1	FALSE	FALSE	FALSE	FALSE	TRUE	TRUE	TRUE	TRUE	TRUE	FALSE	TRUE	FALSE	FALSE
Salazar_2023_SciAdv	CentralAndes_LateHorizon_LH	Peru_Kanamarka1_LH.Capt	darkorange2	5	KMA-28-1	FALSE	FALSE	FALSE	FALSE	TRUE	TRUE	TRUE	TRUE	TRUE	FALSE	TRUE	TRUE	FALSE
Salazar_2023_SciAdv	CentralAndes_LateHorizon_LH	Peru_Kanamarka1_LH.Capt	darkorange2	5	KMA-15A-1	FALSE	FALSE	FALSE	FALSE	TRUE	TRUE	TRUE	TRUE	TRUE	FALSE	TRUE	FALSE	FALSE
Salazar_2023_SciAdv	CentralAndes_LateHorizon_LH	Peru_Kanamarka2_LH.Capt	darkorange2	6	KMA-2-2	FALSE	FALSE	FALSE	FALSE	TRUE	TRUE	TRUE	TRUE	TRUE	FALSE	FALSE	FALSE	FALSE
Salazar_2023_SciAdv	CentralAndes_LateHorizon_LH	Peru_Kanamarka3_LH.Capt	darkorange2	7	KMA-19-1	FALSE	FALSE	FALSE	FALSE	TRUE	TRUE	TRUE	TRUE	TRUE	FALSE	FALSE	FALSE	FALSE
Salazar_2023_SciAdv	CentralAndes_LateHorizon_LH	Peru_Kusicancha1_LH.Capt	darkorange2	8	KCA-1298	FALSE	FALSE	FALSE	FALSE	TRUE	TRUE	TRUE	TRUE	TRUE	FALSE	TRUE	FALSE	FALSE
Salazar_2023_SciAdv	CentralAndes_LateHorizon_LH	Peru_Kusicancha1_LH.Capt	darkorange2	8	KCA-1364	FALSE	FALSE	FALSE	FALSE	TRUE	TRUE	TRUE	TRUE	TRUE	FALSE	TRUE	FALSE	FALSE
Salazar_2023_SciAdv	CentralAndes_LateHorizon_LH	Peru_Kusicancha1_LH.Capt	darkorange2	8	KCA-1108	FALSE	FALSE	FALSE	FALSE	TRUE	TRUE	TRUE	TRUE	TRUE	FALSE	TRUE	FALSE	FALSE
Salazar_2023_SciAdv	CentralAndes_LateHorizon_LH	Peru_Kusicancha2_LH.Capt	darkorange2	9	KCA-3089	FALSE	FALSE	FALSE	FALSE	TRUE	TRUE	TRUE	TRUE	TRUE	FALSE	FALSE	FALSE	FALSE
Salazar_2023_SciAdv	CentralAndes_LateHorizon_LH	Peru_Qotakalli1_LH.Capt	darkorange2	10	QKI-9-3	FALSE	FALSE	FALSE	FALSE	TRUE	TRUE	TRUE	TRUE	TRUE	FALSE	TRUE	FALSE	FALSE
Salazar_2023_SciAdv	CentralAndes_LateHorizon_LH	Peru_Qotakalli1_LH.Capt	darkorange2	10	QKI-21-1	FALSE	FALSE	FALSE	FALSE	TRUE	FALSE	TRUE	TRUE	TRUE	FALSE	TRUE	FALSE	FALSE
Salazar_2023_SciAdv	CentralAndes_LateHorizon_LH	Peru_Qotakalli1_LH.Capt	darkorange2	10	QKI-809	FALSE	FALSE	FALSE	FALSE	TRUE	TRUE	TRUE	TRUE	TRUE	FALSE	TRUE	FALSE	FALSE
Salazar_2023_SciAdv	CentralAndes_LateHorizon_LH	Peru_Qotakalli2_LH.Capt	darkorange2	11	QKI-4	FALSE	FALSE	FALSE	FALSE	TRUE	TRUE	TRUE	TRUE	TRUE	FALSE	FALSE	FALSE	FALSE
Salazar_2023_SciAdv	CentralAndes_LateHorizon_LH	Peru_Sacsahuaman1_LH.Capt	darkorange2	12	SHN-212	FALSE	FALSE	FALSE	FALSE	TRUE	FALSE	TRUE	FALSE	FALSE	FALSE	FALSE	FALSE	FALSE
Salazar_2023_SciAdv	CentralAndes_LateHorizon_LH	Peru_Sacsahuaman2_LH.Capt	darkorange2	13	SHN-575	FALSE	FALSE	FALSE	FALSE	TRUE	TRUE	TRUE	TRUE	TRUE	FALSE	TRUE	FALSE	FALSE
Salazar_2023_SciAdv	CentralAndes_LateHorizon_LH	Peru_Sacsahuaman2_LH.Capt	darkorange2	13	SHN-902	FALSE	FALSE	FALSE	FALSE	TRUE	TRUE	TRUE	TRUE	TRUE	FALSE	TRUE	FALSE	FALSE
Salazar_2023_SciAdv	CentralAndes_LateHorizon_LH	Peru_Sacsahuaman2_LH.Capt	darkorange2	13	SHN-355	FALSE	FALSE	FALSE	FALSE	TRUE	TRUE	TRUE	TRUE	TRUE	FALSE	TRUE	FALSE	FALSE
Salazar_2023_SciAdv	CentralAndes_LateHorizon_LH	Peru_Sacsahuaman3_LH.Capt	darkorange2	14	SHN-492	FALSE	FALSE	FALSE	FALSE	TRUE	TRUE	TRUE	TRUE	TRUE	FALSE	FALSE	FALSE	FALSE
Salazar_2023_SciAdv	CentralAndes_LateIntermediate_LH	Peru_Ollantaytambo_LIP.Capt	orange1	13	OTT-1174	FALSE	FALSE	FALSE	FALSE	TRUE	TRUE	TRUE	TRUE	TRUE	FALSE	TRUE	TRUE	FALSE
Salazar_2023_SciAdv	CentralAndes_LateIntermediate_LH	Peru_Ollantaytambo_LIP.Capt	orange1	13	OTT-1144	FALSE	FALSE	FALSE	FALSE	TRUE	TRUE	TRUE	TRUE	TRUE	FALSE	TRUE	TRUE	FALSE
Salazar_2023_SciAdv	CentralAndes_LateIntermediate_LH	Peru_Ollantaytambo_LIP.Capt	orange1	13	OTT-1165	FALSE	FALSE	FALSE	FALSE	TRUE	TRUE	TRUE	TRUE	TRUE	FALSE	TRUE	TRUE	FALSE
Salazar_2023_SciAdv	CentralAndes_LateIntermediate_LH	Peru_Ollantaytambo_LIP.Capt	orange1	13	OTT-1160	FALSE	FALSE	FALSE	FALSE	TRUE	TRUE	TRUE	TRUE	TRUE	FALSE	TRUE	TRUE	FALSE
Salazar_2023_SciAdv	CentralAndes_LateIntermediate_LH	Peru_Ollantaytambo_LIP.Capt	orange1	13	OTT-1187	FALSE	FALSE	FALSE	FALSE	TRUE	TRUE	TRUE	TRUE	TRUE	FALSE	TRUE	TRUE	FALSE
Scheib_2018_Science	California_Baja_LH	Mexico_Baja_Comondu_Unknown.SG	palevioletred1	1	B-04	FALSE	FALSE	TRUE	TRUE	TRUE	FALSE	TRUE	FALSE	FALSE	FALSE	FALSE	FALSE	FALSE
Scheib_2018_Science	California_Baja_LH	Mexico_Baja_IronSprings_Unknown.SG	palevioletred1	2	MX-01	FALSE	FALSE	TRUE	TRUE	TRUE	FALSE	TRUE	FALSE	FALSE	FALSE	FALSE	FALSE	FALSE
Scheib_2018_Science	California_Baja_LH	Mexico_Pericues_Unknown.SG	palevioletred1	4	B-03	FALSE	FALSE	TRUE	TRUE	TRUE	TRUE	TRUE	FALSE	TRUE	FALSE	FALSE	FALSE	FALSE
Scheib_2018_Science	California_Central_LH	USA_CA_SanFranciscoBay_300BP.SG	palevioletred1	5	Ala1	FALSE	FALSE	TRUE	TRUE	TRUE	TRUE	TRUE	FALSE	TRUE	FALSE	FALSE	FALSE	FALSE
Scheib_2018_Science	California_NorthernChannelIslands_LH	USA_CA_SanMiguel_650BP.SG	violet	1	SM-02	FALSE	FALSE	TRUE	TRUE	TRUE	TRUE	TRUE	FALSE	TRUE	TRUE	TRUE	TRUE	FALSE
Scheib_2018_Science	California_NorthernChannelIslands_LH	USA_CA_SanMiguel_650BP.SG	violet	1	SM-01	FALSE	FALSE	TRUE	TRUE	TRUE	FALSE	TRUE	FALSE	FALSE	TRUE	TRUE	FALSE	FALSE
Scheib_2018_Science	California_NorthernChannelIslands_LH	USA_CA_SantaCruz_1000BP.SG	violet	2	CR-01	FALSE	FALSE	TRUE	TRUE	TRUE	TRUE	TRUE	FALSE	TRUE	FALSE	FALSE	TRUE	FALSE
Scheib_2018_Science	California_SouthernChannelIslands_LH	USA_CA_SanCatalina_400BP.SG	violet	6	CT-01	FALSE	FALSE	TRUE	TRUE	TRUE	TRUE	TRUE	FALSE	TRUE	FALSE	FALSE	TRUE	FALSE
Scheib_2018_Science	California_SouthernChannelIslands_LH	USA_CA_SanClemente_900BP.SG	violet	7	SC-03	FALSE	FALSE	TRUE	TRUE	TRUE	TRUE	TRUE	FALSE	TRUE	TRUE	TRUE	TRUE	FALSE
Scheib_2018_Science	California_SouthernChannelIslands_LH	USA_CA_SanClemente_900BP.SG	violet	7	SC-01	FALSE	FALSE	TRUE	TRUE	TRUE	FALSE	TRUE	FALSE	TRUE	TRUE	TRUE	FALSE	FALSE
Scheib_2018_Science	California_SouthernChannelIslands_LH	USA_CA_SanClemente_900BP.SG	violet	7	SC-05	FALSE	FALSE	TRUE	TRUE	TRUE	TRUE	TRUE	FALSE	TRUE	TRUE	TRUE	TRUE	FALSE
Scheib_2018_Science	California_SouthernChannelIslands_LH	USA_CA_SanClemente_900BP.SG	violet	7	SC-06	FALSE	FALSE	TRUE	TRUE	TRUE	FALSE	TRUE	FALSE	TRUE	TRUE	TRUE	FALSE	FALSE
Scheib_2018_Science	California_SouthernChannelIslands_LH	USA_CA_SanClemente_900BP.SG	violet	7	SC-04	FALSE	FALSE	TRUE	TRUE	TRUE	FALSE	TRUE	FALSE	TRUE	TRUE	TRUE	FALSE	FALSE
Scheib_2018_Science	California_SouthernChannelIslands_LH	USA_CA_SanNicolas_1600BP.SG	violet	8	SN-52	FALSE	FALSE	TRUE	TRUE	TRUE	FALSE	TRUE	FALSE	TRUE	TRUE	TRUE	FALSE	FALSE
Scheib_2018_Science	California_SouthernChannelIslands_LH	USA_CA_SanNicolas_1600BP.SG	violet	8	SN_50	FALSE	FALSE	TRUE	TRUE	TRUE	TRUE	TRUE	FALSE	TRUE	TRUE	TRUE	FALSE	FALSE
Scheib_2018_Science	California_SouthernChannelIslands_LH	USA_CA_SanNicolas_1600BP.SG	violet	8	SN-16	FALSE	FALSE	TRUE	TRUE	TRUE	FALSE	TRUE	FALSE	FALSE	TRUE	TRUE	FALSE	FALSE
Scheib_2018_Science	California_SouthernChannelIslands_LH	USA_CA_SanNicolas_1600BP.SG	violet	8	SN-53	FALSE	FALSE	TRUE	TRUE	TRUE	TRUE	TRUE	FALSE	TRUE	TRUE	TRUE	FALSE	FALSE
Scheib_2018_Science	California_SouthernChannelIslands_LH	USA_CA_SanNicolas_1600BP.SG	violet	8	SN-03	FALSE	FALSE	TRUE	TRUE	TRUE	FALSE	TRUE	FALSE	TRUE	TRUE	TRUE	FALSE	FALSE
Scheib_2018_Science	California_SouthernChannelIslands_LH	USA_CA_SanNicolas_1600BP.SG	violet	8	SN-13	FALSE	FALSE	TRUE	TRUE	TRUE	TRUE	TRUE	FALSE	TRUE	TRUE	TRUE	FALSE	FALSE
Scheib_2018_Science	California_SouthernChannelIslands_LH	USA_CA_SanNicolas_1600BP.SG	violet	8	SN-15	FALSE	FALSE	TRUE	TRUE	TRUE	FALSE	TRUE	FALSE	TRUE	TRUE	TRUE	FALSE	FALSE
Scheib_2018_Science	California_SouthernChannelIslands_LH	USA_CA_SanNicolas_1600BP.SG	violet	8	SN-38	FALSE	FALSE	TRUE	TRUE	TRUE	FALSE	TRUE	FALSE	FALSE	TRUE	TRUE	FALSE	FALSE
Scheib_2018_Science	California_SouthernChannelIslands_LH	USA_CA_SanNicolas_1600BP.SG	violet	8	SN-01	FALSE	FALSE	TRUE	TRUE	TRUE	FALSE	TRUE	FALSE	FALSE	TRUE	TRUE	FALSE	FALSE
Scheib_2018_Science	California_SouthernChannelIslands_LH	USA_CA_SanNicolas_1600BP.SG	violet	8	SN-11	FALSE	FALSE	TRUE	TRUE	TRUE	TRUE	TRUE	FALSE	TRUE	TRUE	TRUE	FALSE	FALSE
Scheib_2018_Science	California_SouthernChannelIslands_LH	USA_CA_SanNicolas_1600BP.SG	violet	8	SN-10	FALSE	FALSE	TRUE	TRUE	TRUE	FALSE	TRUE	FALSE	TRUE	TRUE	TRUE	FALSE	FALSE
Scheib_2018_Science	California_SouthernChannelIslands_MH	USA_CA_SanNicolas_4800BP.SG	violet	23	SN-20	FALSE	FALSE	TRUE	TRUE	TRUE	FALSE	TRUE	FALSE	FALSE	TRUE	TRUE	FALSE	FALSE
Scheib_2018_Science	California_SouthernChannelIslands_MH	USA_CA_SanNicolas_4800BP.SG	violet	23	SN-44	FALSE	FALSE	TRUE	TRUE	TRUE	TRUE	TRUE	FALSE	TRUE	TRUE	TRUE	FALSE	FALSE
Scheib_2018_Science	California_SouthernChannelIslands_MH	USA_CA_SanNicolas_4800BP.SG	violet	23	SN-32	FALSE	FALSE	TRUE	TRUE	TRUE	FALSE	TRUE	FALSE	FALSE	TRUE	TRUE	FALSE	FALSE
Scheib_2018_Science	California_SouthernChannelIslands_MH	USA_CA_SanNicolas_4800BP.SG	violet	23	SN-17	FALSE	FALSE	TRUE	TRUE	TRUE	TRUE	TRUE	FALSE	TRUE	TRUE	TRUE	FALSE	FALSE
Scheib_2018_Science	California_SouthernChannelIslands_MH	USA_CA_SanNicolas_4800BP.SG	violet	23	SN-25	FALSE	FALSE	TRUE	TRUE	TRUE	FALSE	TRUE	FALSE	FALSE	TRUE	TRUE	FALSE	FALSE
Scheib_2018_Science	California_SouthernChannelIslands_MH	USA_CA_SanNicolas_4800BP.SG	violet	23	SN-39	FALSE	FALSE	TRUE	TRUE	TRUE	FALSE	TRUE	FALSE	TRUE	TRUE	TRUE	FALSE	FALSE
Scheib_2018_Science	California_SouthernMainland_LH	USA_CA_NewCuyama_1300BP.SG	palevioletred3	1	NC	FALSE	FALSE	TRUE	TRUE	TRUE	TRUE	TRUE	FALSE	TRUE	FALSE	FALSE	TRUE	FALSE
Scheib_2018_Science	California_SouthernMainland_LH	USA_CA_PointSal_1500BP.SG	palevioletred3	2	PS-07	FALSE	FALSE	TRUE	TRUE	TRUE	FALSE	TRUE	FALSE	TRUE	TRUE	TRUE	FALSE	FALSE
Scheib_2018_Science	California_SouthernMainland_LH	USA_CA_PointSal_1500BP.SG	palevioletred3	2	PS-09	FALSE	FALSE	TRUE	TRUE	TRUE	FALSE	TRUE	FALSE	FALSE	TRUE	TRUE	FALSE	FALSE
Scheib_2018_Science	California_SouthernMainland_LH	USA_CA_PointSal_1500BP.SG	palevioletred3	2	PS-02	FALSE	FALSE	TRUE	FALSE	FALSE	FALSE	TRUE	FALSE	FALSE	TRUE	FALSE	FALSE	FALSE
Scheib_2018_Science	California_SouthernMainland_LH	USA_CA_PointSal_1500BP.SG	palevioletred3	2	PS-18	FALSE	FALSE	TRUE	TRUE	TRUE	FALSE	TRUE	FALSE	FALSE	TRUE	TRUE	FALSE	FALSE
Scheib_2018_Science	California_SouthernMainland_LH	USA_CA_PointSal_1500BP.SG	palevioletred3	2	PS-03	FALSE	FALSE	TRUE	TRUE	TRUE	FALSE	TRUE	FALSE	FALSE	TRUE	TRUE	FALSE	FALSE
Scheib_2018_Science	California_SouthernMainland_LH	USA_CA_PointSal_1500BP.SG	palevioletred3	2	PS-06	FALSE	FALSE	TRUE	TRUE	TRUE	TRUE	TRUE	FALSE	TRUE	TRUE	TRUE	TRUE	FALSE
Scheib_2018_Science	California_SouthernMainland_LH	USA_CA_PointSal_1500BP.SG	palevioletred3	2	PS-17	FALSE	FALSE	TRUE	TRUE	FALSE	FALSE	TRUE	FALSE	FALSE	TRUE	FALSE	FALSE	FALSE
SGDP	Amazonia_UnmaskedModern	Chane	palegreen2	4	TGBS21	FALSE	FALSE	FALSE	FALSE	FALSE	FALSE	FALSE	FALSE	TRUE	FALSE	FALSE	FALSE	FALSE
SGDP	Amazonia_UnmaskedModern	Yukpa	palegreen3	8	Y2040	FALSE	FALSE	FALSE	FALSE	FALSE	FALSE	FALSE	FALSE	TRUE	FALSE	FALSE	FALSE	FALSE
SGDP	CentralAmerica_UnmaskedModern	Mixe	violetred2	2	mixe0042	FALSE	FALSE	FALSE	FALSE	FALSE	FALSE	FALSE	FALSE	TRUE	FALSE	FALSE	FALSE	FALSE
SGDP	CentralAmerica_UnmaskedModern	Mixe	violetred2	2	mixe0002	FALSE	FALSE	FALSE	FALSE	FALSE	FALSE	FALSE	FALSE	TRUE	FALSE	FALSE	FALSE	FALSE
SGDP	CentralAmerica_UnmaskedModern	Mixe	violetred2	2	mixe0007	FALSE	FALSE	FALSE	FALSE	FALSE	FALSE	FALSE	FALSE	TRUE	FALSE	FALSE	FALSE	FALSE
SGDP	CentralAmerica_UnmaskedModern	Mixtec	violetred2	3	mixa0099	FALSE	FALSE	FALSE	FALSE	FALSE	FALSE	FALSE	FALSE	TRUE	FALSE	FALSE	FALSE	FALSE
SGDP	CentralAmerica_UnmaskedModern	Mixtec	violetred2	3	mixa0105	FALSE	FALSE	FALSE	FALSE	FALSE	FALSE	FALSE	FALSE	TRUE	FALSE	FALSE	FALSE	FALSE
SGDP	CentralAmerica_UnmaskedModern	Zapotec	violetred2	5	zapo0099	FALSE	FALSE	FALSE	FALSE	FALSE	FALSE	FALSE	FALSE	TRUE	FALSE	FALSE	FALSE	FALSE
SGDP	CentralAmerica_UnmaskedModern	Zapotec	violetred2	5	zapo0098	FALSE	FALSE	FALSE	FALSE	FALSE	FALSE	FALSE	FALSE	TRUE	FALSE	FALSE	FALSE	FALSE
SGDP	CentralAndes_UnmaskedModern	Quechua	darkorange3	7	NA11200	FALSE	FALSE	FALSE	FALSE	FALSE	FALSE	FALSE	FALSE	TRUE	FALSE	FALSE	FALSE	FALSE
SGDP	CentralAndes_UnmaskedModern	Quechua	darkorange3	7	NA11201	FALSE	FALSE	FALSE	FALSE	FALSE	FALSE	FALSE	FALSE	TRUE	FALSE	FALSE	FALSE	FALSE
SGDP	CentralAndes_UnmaskedModern	Quechua	darkorange3	7	Peru60	FALSE	FALSE	FALSE	FALSE	FALSE	FALSE	FALSE	FALSE	TRUE	FALSE	FALSE	FALSE	FALSE
VillaIslas_2023_Science	CentralAmerica_LH	Mexico_CanadaDeLaVirgen_MidClassic.SG	darkviolet	2	E8CdV	FALSE	FALSE	TRUE	TRUE	TRUE	TRUE	TRUE	FALSE	TRUE	FALSE	FALSE	FALSE	FALSE
VillaIslas_2023_Science	CentralAmerica_LH	Mexico_SierraGorda_Postclassic.SG	darkviolet	3	2417J	FALSE	FALSE	TRUE	TRUE	TRUE	TRUE	TRUE	FALSE	TRUE	TRUE	TRUE	FALSE	FALSE
VillaIslas_2023_Science	CentralAmerica_LH	Mexico_SierraGorda_Postclassic.SG	darkviolet	3	333B	FALSE	FALSE	TRUE	TRUE	TRUE	TRUE	TRUE	FALSE	TRUE	TRUE	TRUE	FALSE	FALSE
VillaIslas_2023_Science	CentralAmerica_LH	Mexico_SierraGorda_Terminalclassic.SG	darkviolet	4	2417Q	FALSE	FALSE	TRUE	TRUE	TRUE	TRUE	TRUE	FALSE	TRUE	FALSE	FALSE	FALSE	FALSE
VillaIslas_2023_Science	SouthernNorthAmerica_LH	Mexico_SierraTarahumara_PostClassic.SG	blueviolet	3	F9	FALSE	FALSE	TRUE	TRUE	TRUE	TRUE	TRUE	FALSE	TRUE	FALSE	FALSE	FALSE	FALSE
