# Supplementary material for: Local agricultural transition, crisis and migration in the Southern Andes
Source: Research Square preprint supplement (doi:10.21203/rs.3.rs-6450570/v1), 2025-05-05
Supplement: Supplementary file 6 [file cf08c700d495a161d832e4be.xlsx]

## Sheet: A. KIN on 1240K
Pair	Relatedness	Second Guess	Log Likelihood Ratio	Within Degree Second Guess	Within Degree Log Likelihood Ratio	k0	k1	k2	IBD Length	IBD Number
AR0149.TrimmingFromTable.Nochr_._AR0151.TrimmingFromTable.Nochr	Unrelated	Third Degree	7.884			1	0	0	0	1
AR0149.TrimmingFromTable.Nochr_._AR0152.TrimmingFromTable.Nochr	Unrelated	Third Degree	15.944			1	0	0	0	1
AR0149.TrimmingFromTable.Nochr_._AR0161.TrimmingFromTable.Nochr	Unrelated	Third Degree	17.229			1	0	0	0	1
AR0149.TrimmingFromTable.Nochr_._AR0162.TrimmingFromTable.Nochr	Unrelated	Third Degree	15.526			1	0	0	0	1
AR0149.TrimmingFromTable.Nochr_._AR0180.TrimmingFromTable.Nochr	Unrelated	Third Degree	8.777			1	0	0	0	1
AR0149.TrimmingFromTable.Nochr_._AR0195.TrimmingFromTable.Nochr	Unrelated	Third Degree	1.915			1	0	0	0	1
AR0149.TrimmingFromTable.Nochr_._AR0500and513.TrimmingFromTable.Nochr	Unrelated	Third Degree	16.87			1	0	0	0	1
AR0149.TrimmingFromTable.Nochr_._AR0501.TrimmingFromTable.Nochr	Unrelated	Third Degree	13.762			1	0	0	0	1
AR0149.TrimmingFromTable.Nochr_._AR0503.TrimmingFromTable.Nochr	Unrelated	Third Degree	8.63			1	0	0	0	1
AR0149.TrimmingFromTable.Nochr_._AR0504.TrimmingFromTable.Nochr	Unrelated	Third Degree	19.441			1	0	0	0	1
AR0149.TrimmingFromTable.Nochr_._AR0505.TrimmingFromTable.Nochr	Unrelated	Third Degree	16.262			1	0	0	0	1
AR0149.TrimmingFromTable.Nochr_._AR0506.TrimmingFromTable.Nochr	Unrelated	Third Degree	15.589			1	0	0	0	1
AR0149.TrimmingFromTable.Nochr_._AR0507.TrimmingFromTable.Nochr	Unrelated	Third Degree	13.076			1	0	0	0	1
AR0149.TrimmingFromTable.Nochr_._AR0508.TrimmingFromTable.Nochr	Unrelated	Third Degree	16.207			1	0	0	0	1
AR0149.TrimmingFromTable.Nochr_._AR0509.TrimmingFromTable.Nochr	Unrelated	Third Degree	15.497			1	0	0	0	1
AR0149.TrimmingFromTable.Nochr_._AR0510.TrimmingFromTable.Nochr	Unrelated	Third Degree	16.506			1	0	0	0	1
AR0149.TrimmingFromTable.Nochr_._AR0511.TrimmingFromTable.Nochr	Unrelated	Third Degree	17.051			1	0	0	0	1
AR0149.TrimmingFromTable.Nochr_._AR0512.TrimmingFromTable.Nochr	Unrelated	Third Degree	17.751			1	0	0	0	1
AR0149.TrimmingFromTable.Nochr_._AR0514.TrimmingFromTable.Nochr	Unrelated	Third Degree	17.075			1	0	0	0	1
AR0149.TrimmingFromTable.Nochr_._AR0515.TrimmingFromTable.Nochr	Unrelated	Third Degree	17.193			1	0	0	0	1
AR0149.TrimmingFromTable.Nochr_._AR0516.TrimmingFromTable.Nochr	Unrelated	Third Degree	16.496			1	0	0	0	1
AR0149.TrimmingFromTable.Nochr_._AR0517.TrimmingFromTable.Nochr	Unrelated	Third Degree	13.844			1	0	0	0	1
AR0149.TrimmingFromTable.Nochr_._AR0518.TrimmingFromTable.Nochr	Unrelated	Third Degree	17.756			1	0	0	0	1
AR0149.TrimmingFromTable.Nochr_._AR0519.TrimmingFromTable.Nochr	Unrelated	Third Degree	14.893			1	0	0	0	1
AR0149.TrimmingFromTable.Nochr_._AR0520.TrimmingFromTable.Nochr	Unrelated	Third Degree	16.013			1	0	0	0	1
AR0149.TrimmingFromTable.Nochr_._AR0521.TrimmingFromTable.Nochr	Unrelated	Third Degree	15.251			1	0	0	0	1
AR0149.TrimmingFromTable.Nochr_._AR0522.TrimmingFromTable.Nochr	Unrelated	Third Degree	16.569			1	0	0	0	1
AR0149.TrimmingFromTable.Nochr_._AR0523.TrimmingFromTable.Nochr	Unrelated	Third Degree	17.805			1	0	0	0	1
AR0149.TrimmingFromTable.Nochr_._AR0524.TrimmingFromTable.Nochr	Unrelated	Third Degree	1.348			1	0	0	0	1
AR0149.TrimmingFromTable.Nochr_._AR0526.TrimmingFromTable.Nochr	Unrelated	Third Degree	17.992			1	0	0	0	1
AR0149.TrimmingFromTable.Nochr_._AR0527.TrimmingFromTable.Nochr	Unrelated	Third Degree	16.741			1	0	0	0	1
AR0149.TrimmingFromTable.Nochr_._AR0528.TrimmingFromTable.Nochr	Unrelated	Third Degree	14.918			1	0	0	0	1
AR0151.TrimmingFromTable.Nochr_._AR0152.TrimmingFromTable.Nochr	Unrelated	Third Degree	13.376			1	0	0	0	1
AR0151.TrimmingFromTable.Nochr_._AR0161.TrimmingFromTable.Nochr	Unrelated	Third Degree	17.526			1	0	0	0	1
AR0151.TrimmingFromTable.Nochr_._AR0162.TrimmingFromTable.Nochr	Unrelated	Third Degree	12.076			1	0	0	0	1
AR0151.TrimmingFromTable.Nochr_._AR0180.TrimmingFromTable.Nochr	Unrelated	Third Degree	12.55			1	0	0	0	1
AR0151.TrimmingFromTable.Nochr_._AR0195.TrimmingFromTable.Nochr	Unrelated	Third Degree	2.579			1	0	0	0	1
AR0151.TrimmingFromTable.Nochr_._AR0500and513.TrimmingFromTable.Nochr	Unrelated	Third Degree	15.898			1	0	0	0	1
AR0151.TrimmingFromTable.Nochr_._AR0501.TrimmingFromTable.Nochr	Unrelated	Third Degree	15.34			1	0	0	0	1
AR0151.TrimmingFromTable.Nochr_._AR0503.TrimmingFromTable.Nochr	Unrelated	Third Degree	6.703			1	0	0	0	1
AR0151.TrimmingFromTable.Nochr_._AR0504.TrimmingFromTable.Nochr	Unrelated	Third Degree	18.667			1	0	0	0	1
AR0151.TrimmingFromTable.Nochr_._AR0505.TrimmingFromTable.Nochr	Unrelated	Third Degree	15.917			1	0	0	0	1
AR0151.TrimmingFromTable.Nochr_._AR0506.TrimmingFromTable.Nochr	Unrelated	Third Degree	17.606			1	0	0	0	1
AR0151.TrimmingFromTable.Nochr_._AR0507.TrimmingFromTable.Nochr	Unrelated	Third Degree	15.254			1	0	0	0	1
AR0151.TrimmingFromTable.Nochr_._AR0508.TrimmingFromTable.Nochr	Unrelated	Third Degree	15.898			1	0	0	0	1
AR0151.TrimmingFromTable.Nochr_._AR0509.TrimmingFromTable.Nochr	Unrelated	Third Degree	16.085			1	0	0	0	1
AR0151.TrimmingFromTable.Nochr_._AR0510.TrimmingFromTable.Nochr	Unrelated	Third Degree	16.066			1	0	0	0	1
AR0151.TrimmingFromTable.Nochr_._AR0511.TrimmingFromTable.Nochr	Unrelated	Third Degree	10.974			0.972	0.028	0	3	3
AR0151.TrimmingFromTable.Nochr_._AR0512.TrimmingFromTable.Nochr	Unrelated	Third Degree	15.744			1	0	0	0	1
AR0151.TrimmingFromTable.Nochr_._AR0514.TrimmingFromTable.Nochr	Unrelated	Third Degree	16.766			1	0	0	0	1
AR0151.TrimmingFromTable.Nochr_._AR0515.TrimmingFromTable.Nochr	Unrelated	Third Degree	11.711			0.977	0.023	0	2	2
AR0151.TrimmingFromTable.Nochr_._AR0516.TrimmingFromTable.Nochr	Unrelated	Third Degree	16.016			1	0	0	0	1
AR0151.TrimmingFromTable.Nochr_._AR0517.TrimmingFromTable.Nochr	Unrelated	Third Degree	16.301			1	0	0	0	1
AR0151.TrimmingFromTable.Nochr_._AR0518.TrimmingFromTable.Nochr	Unrelated	Third Degree	17.473			1	0	0	0	1
AR0151.TrimmingFromTable.Nochr_._AR0519.TrimmingFromTable.Nochr	Unrelated	Third Degree	16.738			1	0	0	0	1
AR0151.TrimmingFromTable.Nochr_._AR0520.TrimmingFromTable.Nochr	Unrelated	Third Degree	16.459			1	0	0	0	1
AR0151.TrimmingFromTable.Nochr_._AR0521.TrimmingFromTable.Nochr	Unrelated	Third Degree	12.663			1	0	0	0	1
AR0151.TrimmingFromTable.Nochr_._AR0522.TrimmingFromTable.Nochr	Unrelated	Third Degree	18.372			1	0	0	0	1
AR0151.TrimmingFromTable.Nochr_._AR0523.TrimmingFromTable.Nochr	Unrelated	Third Degree	17.679			1	0	0	0	1
AR0151.TrimmingFromTable.Nochr_._AR0524.TrimmingFromTable.Nochr	Unrelated	Third Degree	3.246			1	0	0	0	1
AR0151.TrimmingFromTable.Nochr_._AR0526.TrimmingFromTable.Nochr	Unrelated	Third Degree	15.694			1	0	0	0	1
AR0151.TrimmingFromTable.Nochr_._AR0527.TrimmingFromTable.Nochr	Unrelated	Third Degree	16.009			1	0	0	0	1
AR0151.TrimmingFromTable.Nochr_._AR0528.TrimmingFromTable.Nochr	Unrelated	Third Degree	14.595			1	0	0	0	1
AR0152.TrimmingFromTable.Nochr_._AR0161.TrimmingFromTable.Nochr	Unrelated	Third Degree	12.668			1	0	0	0	1
AR0152.TrimmingFromTable.Nochr_._AR0162.TrimmingFromTable.Nochr	Unrelated	Third Degree	14.147			1	0	0	0	1
AR0152.TrimmingFromTable.Nochr_._AR0180.TrimmingFromTable.Nochr	Unrelated	Third Degree	9.801			1	0	0	0	1
AR0152.TrimmingFromTable.Nochr_._AR0195.TrimmingFromTable.Nochr	Unrelated	Third Degree	3.565			1	0	0	0	1
AR0152.TrimmingFromTable.Nochr_._AR0500and513.TrimmingFromTable.Nochr	Unrelated	Third Degree	10.504			1	0	0	0	1
AR0152.TrimmingFromTable.Nochr_._AR0501.TrimmingFromTable.Nochr	Unrelated	Third Degree	10.288			1	0	0	0	1
AR0152.TrimmingFromTable.Nochr_._AR0503.TrimmingFromTable.Nochr	Unrelated	Third Degree	3.5			1	0	0	0	1
AR0152.TrimmingFromTable.Nochr_._AR0504.TrimmingFromTable.Nochr	Unrelated	Third Degree	18.553			1	0	0	0	1
AR0152.TrimmingFromTable.Nochr_._AR0505.TrimmingFromTable.Nochr	Unrelated	Third Degree	16.719			1	0	0	0	1
AR0152.TrimmingFromTable.Nochr_._AR0506.TrimmingFromTable.Nochr	Unrelated	Third Degree	13.285			1	0	0	0	1
AR0152.TrimmingFromTable.Nochr_._AR0507.TrimmingFromTable.Nochr	Unrelated	Third Degree	14.501			1	0	0	0	1
AR0152.TrimmingFromTable.Nochr_._AR0508.TrimmingFromTable.Nochr	Unrelated	Third Degree	17.318			1	0	0	0	1
AR0152.TrimmingFromTable.Nochr_._AR0509.TrimmingFromTable.Nochr	Unrelated	Third Degree	12.897			1	0	0	0	1
AR0152.TrimmingFromTable.Nochr_._AR0510.TrimmingFromTable.Nochr	Unrelated	Third Degree	14.546			1	0	0	0	1
AR0152.TrimmingFromTable.Nochr_._AR0511.TrimmingFromTable.Nochr	Unrelated	Third Degree	15.884			1	0	0	0	1
AR0152.TrimmingFromTable.Nochr_._AR0512.TrimmingFromTable.Nochr	Unrelated	Third Degree	18.496			1	0	0	0	1
AR0152.TrimmingFromTable.Nochr_._AR0514.TrimmingFromTable.Nochr	Unrelated	Third Degree	16.287			1	0	0	0	1
AR0152.TrimmingFromTable.Nochr_._AR0515.TrimmingFromTable.Nochr	Unrelated	Third Degree	17.464			1	0	0	0	1
AR0152.TrimmingFromTable.Nochr_._AR0516.TrimmingFromTable.Nochr	Unrelated	Third Degree	13.26			1	0	0	0	1
AR0152.TrimmingFromTable.Nochr_._AR0517.TrimmingFromTable.Nochr	Unrelated	Third Degree	15.658			1	0	0	0	1
AR0152.TrimmingFromTable.Nochr_._AR0518.TrimmingFromTable.Nochr	Unrelated	Third Degree	12.274			1	0	0	0	1
AR0152.TrimmingFromTable.Nochr_._AR0519.TrimmingFromTable.Nochr	Unrelated	Third Degree	17.319			1	0	0	0	1
AR0152.TrimmingFromTable.Nochr_._AR0520.TrimmingFromTable.Nochr	Unrelated	Third Degree	15.051			1	0	0	0	1
AR0152.TrimmingFromTable.Nochr_._AR0521.TrimmingFromTable.Nochr	Unrelated	Third Degree	12.657			1	0	0	0	1
AR0152.TrimmingFromTable.Nochr_._AR0522.TrimmingFromTable.Nochr	Unrelated	Third Degree	14.39			1	0	0	0	1
AR0152.TrimmingFromTable.Nochr_._AR0523.TrimmingFromTable.Nochr	Unrelated	Third Degree	17.488			1	0	0	0	1
AR0152.TrimmingFromTable.Nochr_._AR0524.TrimmingFromTable.Nochr	Unrelated	Third Degree	3.136			1	0	0	0	1
AR0152.TrimmingFromTable.Nochr_._AR0526.TrimmingFromTable.Nochr	Unrelated	Third Degree	17.172			1	0	0	0	1
AR0152.TrimmingFromTable.Nochr_._AR0527.TrimmingFromTable.Nochr	Unrelated	Third Degree	13.797			1	0	0	0	1
AR0152.TrimmingFromTable.Nochr_._AR0528.TrimmingFromTable.Nochr	Unrelated	Third Degree	13.1			1	0	0	0	1
AR0161.TrimmingFromTable.Nochr_._AR0162.TrimmingFromTable.Nochr	Parent-Child	Second Degree	22.881	Siblings	46.82653758	0	1	0	289	1
AR0161.TrimmingFromTable.Nochr_._AR0180.TrimmingFromTable.Nochr	Unrelated	Third Degree	12.093			1	0	0	0	1
AR0161.TrimmingFromTable.Nochr_._AR0195.TrimmingFromTable.Nochr	Unrelated	Third Degree	4.665			1	0	0	0	1
AR0161.TrimmingFromTable.Nochr_._AR0500and513.TrimmingFromTable.Nochr	Unrelated	Third Degree	11.841			0.979	0.021	0	2	2
AR0161.TrimmingFromTable.Nochr_._AR0501.TrimmingFromTable.Nochr	Unrelated	Third Degree	17.009			1	0	0	0	1
AR0161.TrimmingFromTable.Nochr_._AR0503.TrimmingFromTable.Nochr	Unrelated	Third Degree	9.648			1	0	0	0	1
AR0161.TrimmingFromTable.Nochr_._AR0504.TrimmingFromTable.Nochr	Unrelated	Third Degree	16.049			1	0	0	0	1
AR0161.TrimmingFromTable.Nochr_._AR0505.TrimmingFromTable.Nochr	Unrelated	Third Degree	14.494			1	0	0	0	1
AR0161.TrimmingFromTable.Nochr_._AR0506.TrimmingFromTable.Nochr	Unrelated	Third Degree	17.799			1	0	0	0	1
AR0161.TrimmingFromTable.Nochr_._AR0507.TrimmingFromTable.Nochr	Unrelated	Third Degree	10.87			0.971	0.029	0	4	2
AR0161.TrimmingFromTable.Nochr_._AR0508.TrimmingFromTable.Nochr	Unrelated	Third Degree	17.437			1	0	0	0	1
AR0161.TrimmingFromTable.Nochr_._AR0509.TrimmingFromTable.Nochr	Unrelated	Third Degree	15.132			1	0	0	0	1
AR0161.TrimmingFromTable.Nochr_._AR0510.TrimmingFromTable.Nochr	Unrelated	Third Degree	15.375			1	0	0	0	1
AR0161.TrimmingFromTable.Nochr_._AR0511.TrimmingFromTable.Nochr	Unrelated	Third Degree	11.446			0.97	0.03	0	4	2
AR0161.TrimmingFromTable.Nochr_._AR0512.TrimmingFromTable.Nochr	Unrelated	Third Degree	16.238			1	0	0	0	1
AR0161.TrimmingFromTable.Nochr_._AR0514.TrimmingFromTable.Nochr	Unrelated	Third Degree	15.47			1	0	0	0	1
AR0161.TrimmingFromTable.Nochr_._AR0515.TrimmingFromTable.Nochr	Unrelated	Third Degree	11.753			1	0	0	0	1
AR0161.TrimmingFromTable.Nochr_._AR0516.TrimmingFromTable.Nochr	Unrelated	Third Degree	14.263			1	0	0	0	1
AR0161.TrimmingFromTable.Nochr_._AR0517.TrimmingFromTable.Nochr	Unrelated	Third Degree	18.53			1	0	0	0	1
AR0161.TrimmingFromTable.Nochr_._AR0518.TrimmingFromTable.Nochr	Unrelated	Third Degree	12.653			1	0	0	0	1
AR0161.TrimmingFromTable.Nochr_._AR0519.TrimmingFromTable.Nochr	Unrelated	Third Degree	15.566			1	0	0	0	1
AR0161.TrimmingFromTable.Nochr_._AR0520.TrimmingFromTable.Nochr	Unrelated	Third Degree	15.3			1	0	0	0	1
AR0161.TrimmingFromTable.Nochr_._AR0521.TrimmingFromTable.Nochr	Unrelated	Third Degree	16.196			1	0	0	0	1
AR0161.TrimmingFromTable.Nochr_._AR0522.TrimmingFromTable.Nochr	Unrelated	Third Degree	15.969			1	0	0	0	1
AR0161.TrimmingFromTable.Nochr_._AR0523.TrimmingFromTable.Nochr	Unrelated	Third Degree	17.193			1	0	0	0	1
AR0161.TrimmingFromTable.Nochr_._AR0524.TrimmingFromTable.Nochr	Unrelated	Third Degree	1.215			0.868	0.132	0	0	1
AR0161.TrimmingFromTable.Nochr_._AR0526.TrimmingFromTable.Nochr	Unrelated	Third Degree	13.668			1	0	0	0	1
AR0161.TrimmingFromTable.Nochr_._AR0527.TrimmingFromTable.Nochr	Unrelated	Third Degree	16.396			1	0	0	0	1
AR0161.TrimmingFromTable.Nochr_._AR0528.TrimmingFromTable.Nochr	Unrelated	Third Degree	12.941			1	0	0	0	1
AR0162.TrimmingFromTable.Nochr_._AR0180.TrimmingFromTable.Nochr	Unrelated	Third Degree	9.279			0.955	0.045	0	4	2
AR0162.TrimmingFromTable.Nochr_._AR0195.TrimmingFromTable.Nochr	Unrelated	Third Degree	4.324			0.938	0.062	0	4	2
AR0162.TrimmingFromTable.Nochr_._AR0500and513.TrimmingFromTable.Nochr	Unrelated	Third Degree	13.598			1	0	0	0	1
AR0162.TrimmingFromTable.Nochr_._AR0501.TrimmingFromTable.Nochr	Unrelated	Third Degree	16.703			1	0	0	0	1
AR0162.TrimmingFromTable.Nochr_._AR0503.TrimmingFromTable.Nochr	Unrelated	Third Degree	8.691			1	0	0	0	1
AR0162.TrimmingFromTable.Nochr_._AR0504.TrimmingFromTable.Nochr	Unrelated	Third Degree	15.937			1	0	0	0	1
AR0162.TrimmingFromTable.Nochr_._AR0505.TrimmingFromTable.Nochr	Unrelated	Third Degree	10.266			0.962	0.038	0	8	3
AR0162.TrimmingFromTable.Nochr_._AR0506.TrimmingFromTable.Nochr	Unrelated	Third Degree	9.928			1	0	0	0	1
AR0162.TrimmingFromTable.Nochr_._AR0507.TrimmingFromTable.Nochr	Unrelated	Third Degree	8.788			0.956	0.044	0	6	3
AR0162.TrimmingFromTable.Nochr_._AR0508.TrimmingFromTable.Nochr	Unrelated	Third Degree	11.764			1	0	0	0	1
AR0162.TrimmingFromTable.Nochr_._AR0509.TrimmingFromTable.Nochr	Unrelated	Third Degree	11.624			1	0	0	0	1
AR0162.TrimmingFromTable.Nochr_._AR0510.TrimmingFromTable.Nochr	Unrelated	Third Degree	11.205			0.974	0.026	0	4	3
AR0162.TrimmingFromTable.Nochr_._AR0511.TrimmingFromTable.Nochr	Unrelated	Third Degree	9.938			0.964	0.036	0	3	2
AR0162.TrimmingFromTable.Nochr_._AR0512.TrimmingFromTable.Nochr	Unrelated	Third Degree	13.365			1	0	0	0	1
AR0162.TrimmingFromTable.Nochr_._AR0514.TrimmingFromTable.Nochr	Unrelated	Third Degree	13.046			1	0	0	0	1
AR0162.TrimmingFromTable.Nochr_._AR0515.TrimmingFromTable.Nochr	Unrelated	Third Degree	9.252			0.958	0.042	0	6	4
AR0162.TrimmingFromTable.Nochr_._AR0516.TrimmingFromTable.Nochr	Unrelated	Third Degree	9.034			0.958	0.042	0	8	4
AR0162.TrimmingFromTable.Nochr_._AR0517.TrimmingFromTable.Nochr	Unrelated	Third Degree	15.421			1	0	0	0	1
AR0162.TrimmingFromTable.Nochr_._AR0518.TrimmingFromTable.Nochr	Unrelated	Third Degree	9.375			0.962	0.038	0	9	4
AR0162.TrimmingFromTable.Nochr_._AR0519.TrimmingFromTable.Nochr	Unrelated	Third Degree	13.831			1	0	0	0	1
AR0162.TrimmingFromTable.Nochr_._AR0520.TrimmingFromTable.Nochr	Unrelated	Third Degree	15.308			1	0	0	0	1
AR0162.TrimmingFromTable.Nochr_._AR0521.TrimmingFromTable.Nochr	Unrelated	Third Degree	8.929			0.962	0.038	0	5	4
AR0162.TrimmingFromTable.Nochr_._AR0522.TrimmingFromTable.Nochr	Unrelated	Third Degree	11.35			0.969	0.031	0	7	2
AR0162.TrimmingFromTable.Nochr_._AR0523.TrimmingFromTable.Nochr	Unrelated	Third Degree	16.875			1	0	0	0	1
AR0162.TrimmingFromTable.Nochr_._AR0524.TrimmingFromTable.Nochr	Unrelated	Third Degree	3.451			1	0	0	0	1
AR0162.TrimmingFromTable.Nochr_._AR0526.TrimmingFromTable.Nochr	Unrelated	Third Degree	10.501			1	0	0	0	1
AR0162.TrimmingFromTable.Nochr_._AR0527.TrimmingFromTable.Nochr	Unrelated	Third Degree	13.616			1	0	0	0	1
AR0162.TrimmingFromTable.Nochr_._AR0528.TrimmingFromTable.Nochr	Unrelated	Third Degree	11.406			0.967	0.033	0	7	3
AR0180.TrimmingFromTable.Nochr_._AR0195.TrimmingFromTable.Nochr	Unrelated	Third Degree	2.008			1	0	0	0	1
AR0180.TrimmingFromTable.Nochr_._AR0500and513.TrimmingFromTable.Nochr	Unrelated	Third Degree	10.717			1	0	0	0	1
AR0180.TrimmingFromTable.Nochr_._AR0501.TrimmingFromTable.Nochr	Unrelated	Third Degree	9.19			1	0	0	0	1
AR0180.TrimmingFromTable.Nochr_._AR0503.TrimmingFromTable.Nochr	Unrelated	Third Degree	2.947			1	0	0	0	1
AR0180.TrimmingFromTable.Nochr_._AR0504.TrimmingFromTable.Nochr	Unrelated	Third Degree	17.319			1	0	0	0	1
AR0180.TrimmingFromTable.Nochr_._AR0505.TrimmingFromTable.Nochr	Unrelated	Third Degree	16.352			1	0	0	0	1
AR0180.TrimmingFromTable.Nochr_._AR0506.TrimmingFromTable.Nochr	Unrelated	Third Degree	8.988			1	0	0	0	1
AR0180.TrimmingFromTable.Nochr_._AR0507.TrimmingFromTable.Nochr	Unrelated	Third Degree	9.19			0.961	0.039	0	1	1
AR0180.TrimmingFromTable.Nochr_._AR0508.TrimmingFromTable.Nochr	Unrelated	Third Degree	14.096			1	0	0	0	1
AR0180.TrimmingFromTable.Nochr_._AR0509.TrimmingFromTable.Nochr	Unrelated	Third Degree	13.361			1	0	0	0	1
AR0180.TrimmingFromTable.Nochr_._AR0510.TrimmingFromTable.Nochr	Unrelated	Third Degree	9.002			0.947	0.053	0	11	4
AR0180.TrimmingFromTable.Nochr_._AR0511.TrimmingFromTable.Nochr	Unrelated	Third Degree	12.184			1	0	0	0	1
AR0180.TrimmingFromTable.Nochr_._AR0512.TrimmingFromTable.Nochr	Unrelated	Third Degree	12.967			1	0	0	0	1
AR0180.TrimmingFromTable.Nochr_._AR0514.TrimmingFromTable.Nochr	Unrelated	Third Degree	11.485			1	0	0	0	1
AR0180.TrimmingFromTable.Nochr_._AR0515.TrimmingFromTable.Nochr	Unrelated	Third Degree	15.424			1	0	0	0	1
AR0180.TrimmingFromTable.Nochr_._AR0516.TrimmingFromTable.Nochr	Unrelated	Third Degree	13.483			1	0	0	0	1
AR0180.TrimmingFromTable.Nochr_._AR0517.TrimmingFromTable.Nochr	Unrelated	Third Degree	12.948			1	0	0	0	1
AR0180.TrimmingFromTable.Nochr_._AR0518.TrimmingFromTable.Nochr	Unrelated	Third Degree	16.478			1	0	0	0	1
AR0180.TrimmingFromTable.Nochr_._AR0519.TrimmingFromTable.Nochr	Unrelated	Third Degree	15.881			1	0	0	0	1
AR0180.TrimmingFromTable.Nochr_._AR0520.TrimmingFromTable.Nochr	Unrelated	Third Degree	13.377			1	0	0	0	1
AR0180.TrimmingFromTable.Nochr_._AR0521.TrimmingFromTable.Nochr	Unrelated	Third Degree	14.957			1	0	0	0	1
AR0180.TrimmingFromTable.Nochr_._AR0522.TrimmingFromTable.Nochr	Unrelated	Third Degree	9.901			0.964	0.036	0	3	2
AR0180.TrimmingFromTable.Nochr_._AR0523.TrimmingFromTable.Nochr	Unrelated	Third Degree	11.56			1	0	0	0	1
AR0180.TrimmingFromTable.Nochr_._AR0524.TrimmingFromTable.Nochr	Unrelated	Third Degree	4.025			1	0	0	0	1
AR0180.TrimmingFromTable.Nochr_._AR0526.TrimmingFromTable.Nochr	Unrelated	Third Degree	12.842			1	0	0	0	1
AR0180.TrimmingFromTable.Nochr_._AR0527.TrimmingFromTable.Nochr	Unrelated	Third Degree	10.015			0.964	0.036	0	3	2
AR0180.TrimmingFromTable.Nochr_._AR0528.TrimmingFromTable.Nochr	Unrelated	Third Degree	14.295			1	0	0	0	1
AR0195.TrimmingFromTable.Nochr_._AR0500and513.TrimmingFromTable.Nochr	Unrelated	Third Degree	4.273			1	0	0	0	1
AR0195.TrimmingFromTable.Nochr_._AR0501.TrimmingFromTable.Nochr	Unrelated	Third Degree	1.676			0.937	0.063	0	0	1
AR0195.TrimmingFromTable.Nochr_._AR0503.TrimmingFromTable.Nochr	Second Degree	Parent-Child	0.039			0.487	0.513	0	173	1
AR0195.TrimmingFromTable.Nochr_._AR0504.TrimmingFromTable.Nochr	Unrelated	Third Degree	5.276			0.942	0.058	0	4	2
AR0195.TrimmingFromTable.Nochr_._AR0505.TrimmingFromTable.Nochr	Parent-Child	Second Degree	18.551	Siblings	22.82030483	0	1	0	288	1
AR0195.TrimmingFromTable.Nochr_._AR0506.TrimmingFromTable.Nochr	Unrelated	Third Degree	5.49			1	0	0	0	1
AR0195.TrimmingFromTable.Nochr_._AR0507.TrimmingFromTable.Nochr	Parent-Child	Second Degree	18.945	Siblings	6.419194117	0	1	0	286	1
AR0195.TrimmingFromTable.Nochr_._AR0508.TrimmingFromTable.Nochr	Unrelated	Third Degree	7.709			1	0	0	0	1
AR0195.TrimmingFromTable.Nochr_._AR0509.TrimmingFromTable.Nochr	Unrelated	Third Degree	0.47			0.853	0.147	0	6	1
AR0195.TrimmingFromTable.Nochr_._AR0510.TrimmingFromTable.Nochr	Second Degree	Third Degree	0.397			0.586	0.414	0	102	13
AR0195.TrimmingFromTable.Nochr_._AR0511.TrimmingFromTable.Nochr	Parent-Child	Second Degree	14.348	Siblings	17.40183679	0	1	0	288	1
AR0195.TrimmingFromTable.Nochr_._AR0512.TrimmingFromTable.Nochr	Unrelated	Third Degree	9.02			1	0	0	0	1
AR0195.TrimmingFromTable.Nochr_._AR0514.TrimmingFromTable.Nochr	Unrelated	Third Degree	2.639			0.931	0.069	0	0	1
AR0195.TrimmingFromTable.Nochr_._AR0515.TrimmingFromTable.Nochr	Siblings	Second Degree	27.539	Parent-Child	6.241759482	0.17	0.531	0.298	187	15
AR0195.TrimmingFromTable.Nochr_._AR0516.TrimmingFromTable.Nochr	Siblings	Second Degree	5.731	Parent-Child	23.77532988	0.345	0.5	0.155	183	17
AR0195.TrimmingFromTable.Nochr_._AR0517.TrimmingFromTable.Nochr	Unrelated	Third Degree	7.532			1	0	0	0	1
AR0195.TrimmingFromTable.Nochr_._AR0518.TrimmingFromTable.Nochr	Unrelated	Third Degree	3.556			0.932	0.068	0	1	1
AR0195.TrimmingFromTable.Nochr_._AR0519.TrimmingFromTable.Nochr	Unrelated	Third Degree	3.675			0.93	0.07	0	6	1
AR0195.TrimmingFromTable.Nochr_._AR0520.TrimmingFromTable.Nochr	Unrelated	Third Degree	7.972			1	0	0	0	1
AR0195.TrimmingFromTable.Nochr_._AR0521.TrimmingFromTable.Nochr	Third Degree	Unrelated	0.501			0.779	0.221	0	42	4
AR0195.TrimmingFromTable.Nochr_._AR0522.TrimmingFromTable.Nochr	Third Degree	Unrelated	0.653			0.759	0.241	0	54	3
AR0195.TrimmingFromTable.Nochr_._AR0523.TrimmingFromTable.Nochr	Unrelated	Third Degree	4.019			0.927	0.073	0	6	2
AR0195.TrimmingFromTable.Nochr_._AR0524.TrimmingFromTable.Nochr	Unrelated	Third Degree	0.632			1	0	0	0	1
AR0195.TrimmingFromTable.Nochr_._AR0526.TrimmingFromTable.Nochr	Unrelated	Third Degree	3.526			0.936	0.064	0	0	1
AR0195.TrimmingFromTable.Nochr_._AR0527.TrimmingFromTable.Nochr	Unrelated	Third Degree	1.608			0.88	0.12	0	0	1
AR0195.TrimmingFromTable.Nochr_._AR0528.TrimmingFromTable.Nochr	Unrelated	Third Degree	2.317			0.931	0.069	0	0	1
AR0500and513.TrimmingFromTable.Nochr_._AR0501.TrimmingFromTable.Nochr	Unrelated	Third Degree	5.314			0.916	0.084	0	19	5
AR0500and513.TrimmingFromTable.Nochr_._AR0503.TrimmingFromTable.Nochr	Unrelated	Third Degree	5.632			1	0	0	0	1
AR0500and513.TrimmingFromTable.Nochr_._AR0504.TrimmingFromTable.Nochr	Unrelated	Third Degree	6.881			0.918	0.082	0	16	6
AR0500and513.TrimmingFromTable.Nochr_._AR0505.TrimmingFromTable.Nochr	Unrelated	Third Degree	9.66			0.958	0.042	0	7	3
AR0500and513.TrimmingFromTable.Nochr_._AR0506.TrimmingFromTable.Nochr	Unrelated	Third Degree	9.246			0.947	0.053	0	14	5
AR0500and513.TrimmingFromTable.Nochr_._AR0507.TrimmingFromTable.Nochr	Unrelated	Third Degree	5.56			0.926	0.074	0	16	5
AR0500and513.TrimmingFromTable.Nochr_._AR0508.TrimmingFromTable.Nochr	Unrelated	Third Degree	8.696			0.953	0.047	0	6	4
AR0500and513.TrimmingFromTable.Nochr_._AR0509.TrimmingFromTable.Nochr	Unrelated	Third Degree	8.788			0.954	0.046	0	5	3
AR0500and513.TrimmingFromTable.Nochr_._AR0510.TrimmingFromTable.Nochr	Unrelated	Third Degree	4.388			0.91	0.09	0	20	10
AR0500and513.TrimmingFromTable.Nochr_._AR0511.TrimmingFromTable.Nochr	Unrelated	Third Degree	7.678			0.945	0.055	0	10	4
AR0500and513.TrimmingFromTable.Nochr_._AR0512.TrimmingFromTable.Nochr	Unrelated	Third Degree	7.684			0.947	0.053	0	7	6
AR0500and513.TrimmingFromTable.Nochr_._AR0514.TrimmingFromTable.Nochr	Unrelated	Third Degree	6.607			0.934	0.066	0	14	4
AR0500and513.TrimmingFromTable.Nochr_._AR0515.TrimmingFromTable.Nochr	Unrelated	Third Degree	5.474			0.923	0.077	0	12	5
AR0500and513.TrimmingFromTable.Nochr_._AR0516.TrimmingFromTable.Nochr	Unrelated	Third Degree	6.058			0.922	0.078	0	16	6
AR0500and513.TrimmingFromTable.Nochr_._AR0517.TrimmingFromTable.Nochr	Unrelated	Third Degree	17.394			1	0	0	0	1
AR0500and513.TrimmingFromTable.Nochr_._AR0518.TrimmingFromTable.Nochr	Unrelated	Third Degree	8.178			0.952	0.048	0	6	4
AR0500and513.TrimmingFromTable.Nochr_._AR0519.TrimmingFromTable.Nochr	Unrelated	Third Degree	6.191			0.923	0.077	0	13	5
AR0500and513.TrimmingFromTable.Nochr_._AR0520.TrimmingFromTable.Nochr	Unrelated	Third Degree	16.406			1	0	0	0	1
AR0500and513.TrimmingFromTable.Nochr_._AR0521.TrimmingFromTable.Nochr	Unrelated	Third Degree	4.446			0.917	0.083	0	10	4
AR0500and513.TrimmingFromTable.Nochr_._AR0522.TrimmingFromTable.Nochr	Unrelated	Third Degree	2.534			0.868	0.132	0	27	8
AR0500and513.TrimmingFromTable.Nochr_._AR0523.TrimmingFromTable.Nochr	Unrelated	Third Degree	7.789			0.933	0.067	0	14	4
AR0500and513.TrimmingFromTable.Nochr_._AR0524.TrimmingFromTable.Nochr	Unrelated	Third Degree	3.331			1	0	0	0	1
AR0500and513.TrimmingFromTable.Nochr_._AR0526.TrimmingFromTable.Nochr	Unrelated	Third Degree	8.116			0.948	0.052	0	7	4
AR0500and513.TrimmingFromTable.Nochr_._AR0527.TrimmingFromTable.Nochr	Unrelated	Third Degree	4.975			0.906	0.094	0	18	7
AR0500and513.TrimmingFromTable.Nochr_._AR0528.TrimmingFromTable.Nochr	Third Degree	Unrelated	0.655			0.769	0.231	0	53	12
AR0501.TrimmingFromTable.Nochr_._AR0503.TrimmingFromTable.Nochr	Unrelated	Third Degree	3.345			0.937	0.063	0	0	1
AR0501.TrimmingFromTable.Nochr_._AR0504.TrimmingFromTable.Nochr	Unrelated	Third Degree	1.592			0.825	0.175	0	41	8
AR0501.TrimmingFromTable.Nochr_._AR0505.TrimmingFromTable.Nochr	Unrelated	Third Degree	7.214			0.925	0.075	0	17	6
AR0501.TrimmingFromTable.Nochr_._AR0506.TrimmingFromTable.Nochr	Unrelated	Third Degree	6.413			0.939	0.061	0	10	3
AR0501.TrimmingFromTable.Nochr_._AR0507.TrimmingFromTable.Nochr	Unrelated	Third Degree	9.057			0.944	0.056	0	11	4
AR0501.TrimmingFromTable.Nochr_._AR0508.TrimmingFromTable.Nochr	Unrelated	Third Degree	10.414			0.957	0.043	0	11	3
AR0501.TrimmingFromTable.Nochr_._AR0509.TrimmingFromTable.Nochr	Unrelated	Third Degree	8.253			0.939	0.061	0	11	4
AR0501.TrimmingFromTable.Nochr_._AR0510.TrimmingFromTable.Nochr	Unrelated	Third Degree	6.387			0.929	0.071	0	12	4
AR0501.TrimmingFromTable.Nochr_._AR0511.TrimmingFromTable.Nochr	Unrelated	Third Degree	3.588			0.882	0.118	0	27	7
AR0501.TrimmingFromTable.Nochr_._AR0512.TrimmingFromTable.Nochr	Unrelated	Third Degree	0.671			0.828	0.172	0	37	8
AR0501.TrimmingFromTable.Nochr_._AR0514.TrimmingFromTable.Nochr	Unrelated	Third Degree	13.73			1	0	0	0	1
AR0501.TrimmingFromTable.Nochr_._AR0515.TrimmingFromTable.Nochr	Unrelated	Third Degree	6.82			0.94	0.06	0	14	5
AR0501.TrimmingFromTable.Nochr_._AR0516.TrimmingFromTable.Nochr	Unrelated	Third Degree	8.297			0.953	0.047	0	7	3
AR0501.TrimmingFromTable.Nochr_._AR0517.TrimmingFromTable.Nochr	Unrelated	Third Degree	17.597			1	0	0	0	1
AR0501.TrimmingFromTable.Nochr_._AR0518.TrimmingFromTable.Nochr	Unrelated	Third Degree	7.288			0.936	0.064	0	9	4
AR0501.TrimmingFromTable.Nochr_._AR0519.TrimmingFromTable.Nochr	Unrelated	Third Degree	7.063			0.923	0.077	0	19	6
AR0501.TrimmingFromTable.Nochr_._AR0520.TrimmingFromTable.Nochr	Unrelated	Third Degree	16.029			1	0	0	0	1
AR0501.TrimmingFromTable.Nochr_._AR0521.TrimmingFromTable.Nochr	Unrelated	Third Degree	1.139			0.847	0.153	0	35	8
AR0501.TrimmingFromTable.Nochr_._AR0522.TrimmingFromTable.Nochr	Third Degree	Unrelated	0.011			0.788	0.212	0	37	6
AR0501.TrimmingFromTable.Nochr_._AR0523.TrimmingFromTable.Nochr	Unrelated	Third Degree	11.643			0.965	0.035	0	9	4
AR0501.TrimmingFromTable.Nochr_._AR0524.TrimmingFromTable.Nochr	Unrelated	Third Degree	3.519			1	0	0	0	1
AR0501.TrimmingFromTable.Nochr_._AR0526.TrimmingFromTable.Nochr	Unrelated	Third Degree	7.429			0.94	0.06	0	6	3
AR0501.TrimmingFromTable.Nochr_._AR0527.TrimmingFromTable.Nochr	Unrelated	Third Degree	7.847			0.943	0.057	0	8	3
AR0501.TrimmingFromTable.Nochr_._AR0528.TrimmingFromTable.Nochr	Unrelated	Third Degree	2.936			0.859	0.141	0	33	9
AR0503.TrimmingFromTable.Nochr_._AR0504.TrimmingFromTable.Nochr	Unrelated	Third Degree	9.08			0.956	0.044	0	2	2
AR0503.TrimmingFromTable.Nochr_._AR0505.TrimmingFromTable.Nochr	Second Degree	Third Degree	6.373			0.509	0.491	0	143	20
AR0503.TrimmingFromTable.Nochr_._AR0506.TrimmingFromTable.Nochr	Unrelated	Third Degree	7.548			1	0	0	0	1
AR0503.TrimmingFromTable.Nochr_._AR0507.TrimmingFromTable.Nochr	Second Degree	Third Degree	6.494			0.462	0.538	0	153	12
AR0503.TrimmingFromTable.Nochr_._AR0508.TrimmingFromTable.Nochr	Unrelated	Third Degree	6.058			0.936	0.064	0	6	1
AR0503.TrimmingFromTable.Nochr_._AR0509.TrimmingFromTable.Nochr	Unrelated	Third Degree	2.86			0.877	0.123	0	9	2
AR0503.TrimmingFromTable.Nochr_._AR0510.TrimmingFromTable.Nochr	Second Degree	Third Degree	10.726			0.487	0.513	0	156	18
AR0503.TrimmingFromTable.Nochr_._AR0511.TrimmingFromTable.Nochr	Second Degree	Third Degree	4.636			0.48	0.52	0	139	11
AR0503.TrimmingFromTable.Nochr_._AR0512.TrimmingFromTable.Nochr	Unrelated	Third Degree	10.489			1	0	0	0	1
AR0503.TrimmingFromTable.Nochr_._AR0514.TrimmingFromTable.Nochr	Unrelated	Third Degree	5.746			1	0	0	0	1
AR0503.TrimmingFromTable.Nochr_._AR0515.TrimmingFromTable.Nochr	Parent-Child	Second Degree	24.915	Siblings	31.16865451	0	1	0	288	1
AR0503.TrimmingFromTable.Nochr_._AR0516.TrimmingFromTable.Nochr	Parent-Child	Second Degree	21.497	Siblings	34.28604598	0	1	0	288	1
AR0503.TrimmingFromTable.Nochr_._AR0517.TrimmingFromTable.Nochr	Unrelated	Third Degree	9.143			1	0	0	0	1
AR0503.TrimmingFromTable.Nochr_._AR0518.TrimmingFromTable.Nochr	Unrelated	Third Degree	8.079			1	0	0	0	1
AR0503.TrimmingFromTable.Nochr_._AR0519.TrimmingFromTable.Nochr	Unrelated	Third Degree	4.609			0.927	0.073	0	8	1
AR0503.TrimmingFromTable.Nochr_._AR0520.TrimmingFromTable.Nochr	Unrelated	Third Degree	9.085			1	0	0	0	1
AR0503.TrimmingFromTable.Nochr_._AR0521.TrimmingFromTable.Nochr	Unrelated	Third Degree	5.248			0.94	0.06	0	0	1
AR0503.TrimmingFromTable.Nochr_._AR0522.TrimmingFromTable.Nochr	Unrelated	Third Degree	5.32			0.943	0.057	0	0	1
AR0503.TrimmingFromTable.Nochr_._AR0523.TrimmingFromTable.Nochr	Unrelated	Third Degree	7.362			0.95	0.05	0	4	1
AR0503.TrimmingFromTable.Nochr_._AR0524.TrimmingFromTable.Nochr	Second Degree	Third Degree	0.416			0.49	0.51	0	148	1
AR0503.TrimmingFromTable.Nochr_._AR0526.TrimmingFromTable.Nochr	Unrelated	Third Degree	4.55			0.924	0.076	0	11	2
AR0503.TrimmingFromTable.Nochr_._AR0527.TrimmingFromTable.Nochr	Unrelated	Third Degree	1.914			0.856	0.144	0	25	5
AR0503.TrimmingFromTable.Nochr_._AR0528.TrimmingFromTable.Nochr	Unrelated	Third Degree	3.643			0.925	0.075	0	6	1
AR0504.TrimmingFromTable.Nochr_._AR0505.TrimmingFromTable.Nochr	Unrelated	Third Degree	7.964			0.942	0.058	0	10	4
AR0504.TrimmingFromTable.Nochr_._AR0506.TrimmingFromTable.Nochr	Unrelated	Third Degree	10.807			0.968	0.032	0	7	3
AR0504.TrimmingFromTable.Nochr_._AR0507.TrimmingFromTable.Nochr	Unrelated	Third Degree	2.523			0.881	0.119	0	22	5
AR0504.TrimmingFromTable.Nochr_._AR0508.TrimmingFromTable.Nochr	Unrelated	Third Degree	11.902			1	0	0	0	1
AR0504.TrimmingFromTable.Nochr_._AR0509.TrimmingFromTable.Nochr	Unrelated	Third Degree	7.987			0.937	0.063	0	14	6
AR0504.TrimmingFromTable.Nochr_._AR0510.TrimmingFromTable.Nochr	Unrelated	Third Degree	7.585			0.938	0.062	0	14	8
AR0504.TrimmingFromTable.Nochr_._AR0511.TrimmingFromTable.Nochr	Unrelated	Third Degree	4.549			0.913	0.087	0	18	5
AR0504.TrimmingFromTable.Nochr_._AR0512.TrimmingFromTable.Nochr	Unrelated	Third Degree	8.038			0.938	0.062	0	15	6
AR0504.TrimmingFromTable.Nochr_._AR0514.TrimmingFromTable.Nochr	Unrelated	Third Degree	10.362			0.959	0.041	0	10	4
AR0504.TrimmingFromTable.Nochr_._AR0515.TrimmingFromTable.Nochr	Unrelated	Third Degree	9.847			0.955	0.045	0	11	4
AR0504.TrimmingFromTable.Nochr_._AR0516.TrimmingFromTable.Nochr	Unrelated	Third Degree	4.86			0.904	0.096	0	27	9
AR0504.TrimmingFromTable.Nochr_._AR0517.TrimmingFromTable.Nochr	Unrelated	Third Degree	19.068			1	0	0	0	1
AR0504.TrimmingFromTable.Nochr_._AR0518.TrimmingFromTable.Nochr	Unrelated	Third Degree	7.017			0.937	0.063	0	17	7
AR0504.TrimmingFromTable.Nochr_._AR0519.TrimmingFromTable.Nochr	Unrelated	Third Degree	10.613			0.972	0.028	0	4	2
AR0504.TrimmingFromTable.Nochr_._AR0520.TrimmingFromTable.Nochr	Unrelated	Third Degree	19.205			1	0	0	0	1
AR0504.TrimmingFromTable.Nochr_._AR0521.TrimmingFromTable.Nochr	Unrelated	Third Degree	3.272			0.889	0.111	0	27	9
AR0504.TrimmingFromTable.Nochr_._AR0522.TrimmingFromTable.Nochr	Second Degree	Siblings	10.851			0.394	0.606	0	176	20
AR0504.TrimmingFromTable.Nochr_._AR0523.TrimmingFromTable.Nochr	Unrelated	Third Degree	12.252			1	0	0	0	1
AR0504.TrimmingFromTable.Nochr_._AR0524.TrimmingFromTable.Nochr	Unrelated	Third Degree	11.42			1	0	0	0	1
AR0504.TrimmingFromTable.Nochr_._AR0526.TrimmingFromTable.Nochr	Unrelated	Third Degree	9.021			0.948	0.052	0	8	4
AR0504.TrimmingFromTable.Nochr_._AR0527.TrimmingFromTable.Nochr	Unrelated	Third Degree	8.072			0.935	0.065	0	13	7
AR0504.TrimmingFromTable.Nochr_._AR0528.TrimmingFromTable.Nochr	Unrelated	Third Degree	3.384			0.878	0.122	0	25	9
AR0505.TrimmingFromTable.Nochr_._AR0506.TrimmingFromTable.Nochr	Unrelated	Third Degree	10.661			0.965	0.035	0	6	3
AR0505.TrimmingFromTable.Nochr_._AR0507.TrimmingFromTable.Nochr	Siblings	Second Degree	17.834	Parent-Child	16.75561286	0.216	0.623	0.161	199	30
AR0505.TrimmingFromTable.Nochr_._AR0508.TrimmingFromTable.Nochr	Unrelated	Third Degree	9.353			0.944	0.056	0	8	4
AR0505.TrimmingFromTable.Nochr_._AR0509.TrimmingFromTable.Nochr	Unrelated	Third Degree	8.687			0.944	0.056	0	8	3
AR0505.TrimmingFromTable.Nochr_._AR0510.TrimmingFromTable.Nochr	Unrelated	Third Degree	2.453			0.861	0.139	0	28	8
AR0505.TrimmingFromTable.Nochr_._AR0511.TrimmingFromTable.Nochr	Siblings	Second Degree	13.54	Parent-Child	31.77634268	0.225	0.568	0.207	178	32
AR0505.TrimmingFromTable.Nochr_._AR0512.TrimmingFromTable.Nochr	Unrelated	Third Degree	9.67			0.968	0.032	0	3	2
AR0505.TrimmingFromTable.Nochr_._AR0514.TrimmingFromTable.Nochr	Unrelated	Third Degree	11.203			0.962	0.038	0	9	4
AR0505.TrimmingFromTable.Nochr_._AR0515.TrimmingFromTable.Nochr	Second Degree	Third Degree	8.846			0.516	0.484	0	144	22
AR0505.TrimmingFromTable.Nochr_._AR0516.TrimmingFromTable.Nochr	Second Degree	Third Degree	7.218			0.625	0.375	0	108	28
AR0505.TrimmingFromTable.Nochr_._AR0517.TrimmingFromTable.Nochr	Unrelated	Third Degree	18.937			1	0	0	0	1
AR0505.TrimmingFromTable.Nochr_._AR0518.TrimmingFromTable.Nochr	Unrelated	Third Degree	7.797			0.942	0.058	0	10	5
AR0505.TrimmingFromTable.Nochr_._AR0519.TrimmingFromTable.Nochr	Unrelated	Third Degree	8.376			0.948	0.052	0	9	4
AR0505.TrimmingFromTable.Nochr_._AR0520.TrimmingFromTable.Nochr	Unrelated	Third Degree	19.699			1	0	0	0	1
AR0505.TrimmingFromTable.Nochr_._AR0521.TrimmingFromTable.Nochr	Unrelated	Third Degree	7.991			0.937	0.063	0	11	6
AR0505.TrimmingFromTable.Nochr_._AR0522.TrimmingFromTable.Nochr	Unrelated	Third Degree	7.276			0.921	0.079	0	18	8
AR0505.TrimmingFromTable.Nochr_._AR0523.TrimmingFromTable.Nochr	Unrelated	Third Degree	10.092			0.954	0.046	0	9	4
AR0505.TrimmingFromTable.Nochr_._AR0524.TrimmingFromTable.Nochr	Unrelated	Third Degree	8.592			1	0	0	0	1
AR0505.TrimmingFromTable.Nochr_._AR0526.TrimmingFromTable.Nochr	Unrelated	Third Degree	12.486			1	0	0	0	1
AR0505.TrimmingFromTable.Nochr_._AR0527.TrimmingFromTable.Nochr	Unrelated	Third Degree	2.793			0.854	0.146	0	38	10
AR0505.TrimmingFromTable.Nochr_._AR0528.TrimmingFromTable.Nochr	Unrelated	Third Degree	8.283			0.938	0.062	0	13	6
AR0506.TrimmingFromTable.Nochr_._AR0507.TrimmingFromTable.Nochr	Unrelated	Third Degree	9.583			0.966	0.034	0	1	1
AR0506.TrimmingFromTable.Nochr_._AR0508.TrimmingFromTable.Nochr	Unrelated	Third Degree	13.417			1	0	0	0	1
AR0506.TrimmingFromTable.Nochr_._AR0509.TrimmingFromTable.Nochr	Unrelated	Third Degree	8.285			0.951	0.049	0	7	4
AR0506.TrimmingFromTable.Nochr_._AR0510.TrimmingFromTable.Nochr	Unrelated	Third Degree	9.943			0.967	0.033	0	4	3
AR0506.TrimmingFromTable.Nochr_._AR0511.TrimmingFromTable.Nochr	Unrelated	Third Degree	8.51			0.959	0.041	0	3	2
AR0506.TrimmingFromTable.Nochr_._AR0512.TrimmingFromTable.Nochr	Unrelated	Third Degree	7.594			0.94	0.06	0	14	6
AR0506.TrimmingFromTable.Nochr_._AR0514.TrimmingFromTable.Nochr	Unrelated	Third Degree	9.694			0.961	0.039	0	4	3
AR0506.TrimmingFromTable.Nochr_._AR0515.TrimmingFromTable.Nochr	Unrelated	Third Degree	9.223			0.965	0.035	0	3	2
AR0506.TrimmingFromTable.Nochr_._AR0516.TrimmingFromTable.Nochr	Unrelated	Third Degree	7.438			0.95	0.05	0	10	4
AR0506.TrimmingFromTable.Nochr_._AR0517.TrimmingFromTable.Nochr	Unrelated	Third Degree	17.593			1	0	0	0	1
AR0506.TrimmingFromTable.Nochr_._AR0518.TrimmingFromTable.Nochr	Unrelated	Third Degree	8.148			0.941	0.059	0	11	4
AR0506.TrimmingFromTable.Nochr_._AR0519.TrimmingFromTable.Nochr	Unrelated	Third Degree	9.812			0.963	0.037	0	7	3
AR0506.TrimmingFromTable.Nochr_._AR0520.TrimmingFromTable.Nochr	Unrelated	Third Degree	17.642			1	0	0	0	1
AR0506.TrimmingFromTable.Nochr_._AR0521.TrimmingFromTable.Nochr	Unrelated	Third Degree	3.248			0.899	0.101	0	24	10
AR0506.TrimmingFromTable.Nochr_._AR0522.TrimmingFromTable.Nochr	Unrelated	Third Degree	8.756			0.948	0.052	0	6	4
AR0506.TrimmingFromTable.Nochr_._AR0523.TrimmingFromTable.Nochr	Unrelated	Third Degree	10.117			0.949	0.051	0	11	5
AR0506.TrimmingFromTable.Nochr_._AR0524.TrimmingFromTable.Nochr	Unrelated	Third Degree	3.748			1	0	0	0	1
AR0506.TrimmingFromTable.Nochr_._AR0526.TrimmingFromTable.Nochr	Unrelated	Third Degree	10.105			0.962	0.038	0	4	2
AR0506.TrimmingFromTable.Nochr_._AR0527.TrimmingFromTable.Nochr	Unrelated	Third Degree	8.409			0.948	0.052	0	5	2
AR0506.TrimmingFromTable.Nochr_._AR0528.TrimmingFromTable.Nochr	Unrelated	Third Degree	5.803			0.926	0.074	0	17	4
AR0507.TrimmingFromTable.Nochr_._AR0508.TrimmingFromTable.Nochr	Unrelated	Third Degree	6.543			0.916	0.084	0	14	7
AR0507.TrimmingFromTable.Nochr_._AR0509.TrimmingFromTable.Nochr	Unrelated	Third Degree	3.942			0.908	0.092	0	14	5
AR0507.TrimmingFromTable.Nochr_._AR0510.TrimmingFromTable.Nochr	Unrelated	Third Degree	1.633			0.84	0.16	0	40	10
AR0507.TrimmingFromTable.Nochr_._AR0511.TrimmingFromTable.Nochr	Siblings	Second Degree	44.41	Parent-Child	50.16822234	0.208	0.513	0.279	161	28
AR0507.TrimmingFromTable.Nochr_._AR0512.TrimmingFromTable.Nochr	Unrelated	Third Degree	8.44			0.942	0.058	0	13	3
AR0507.TrimmingFromTable.Nochr_._AR0514.TrimmingFromTable.Nochr	Unrelated	Third Degree	6.984			0.943	0.057	0	6	4
AR0507.TrimmingFromTable.Nochr_._AR0515.TrimmingFromTable.Nochr	Second Degree	Third Degree	9.886			0.454	0.546	0	158	19
AR0507.TrimmingFromTable.Nochr_._AR0516.TrimmingFromTable.Nochr	Second Degree	Third Degree	8.448			0.54	0.46	0	128	23
AR0507.TrimmingFromTable.Nochr_._AR0517.TrimmingFromTable.Nochr	Unrelated	Third Degree	16.386			1	0	0	0	1
AR0507.TrimmingFromTable.Nochr_._AR0518.TrimmingFromTable.Nochr	Unrelated	Third Degree	5.809			0.924	0.076	0	18	8
AR0507.TrimmingFromTable.Nochr_._AR0519.TrimmingFromTable.Nochr	Unrelated	Third Degree	2.43			0.858	0.142	0	32	10
AR0507.TrimmingFromTable.Nochr_._AR0520.TrimmingFromTable.Nochr	Unrelated	Third Degree	14.117			1	0	0	0	1
AR0507.TrimmingFromTable.Nochr_._AR0521.TrimmingFromTable.Nochr	Unrelated	Third Degree	1.798			0.862	0.138	0	30	9
AR0507.TrimmingFromTable.Nochr_._AR0522.TrimmingFromTable.Nochr	Unrelated	Third Degree	2.013			0.856	0.144	0	31	10
AR0507.TrimmingFromTable.Nochr_._AR0523.TrimmingFromTable.Nochr	Unrelated	Third Degree	4.759			0.909	0.091	0	22	7
AR0507.TrimmingFromTable.Nochr_._AR0524.TrimmingFromTable.Nochr	Unrelated	Third Degree	1.54			0.937	0.063	0	0	1
AR0507.TrimmingFromTable.Nochr_._AR0526.TrimmingFromTable.Nochr	Unrelated	Third Degree	7.027			0.944	0.056	0	10	4
AR0507.TrimmingFromTable.Nochr_._AR0527.TrimmingFromTable.Nochr	Unrelated	Third Degree	2.533			0.86	0.14	0	33	7
AR0507.TrimmingFromTable.Nochr_._AR0528.TrimmingFromTable.Nochr	Unrelated	Third Degree	5.726			0.916	0.084	0	16	6
AR0508.TrimmingFromTable.Nochr_._AR0509.TrimmingFromTable.Nochr	Unrelated	Third Degree	3.122			0.867	0.133	0	35	10
AR0508.TrimmingFromTable.Nochr_._AR0510.TrimmingFromTable.Nochr	Unrelated	Third Degree	3.094			0.881	0.119	0	32	12
AR0508.TrimmingFromTable.Nochr_._AR0511.TrimmingFromTable.Nochr	Unrelated	Third Degree	8.438			0.939	0.061	0	14	6
AR0508.TrimmingFromTable.Nochr_._AR0512.TrimmingFromTable.Nochr	Unrelated	Third Degree	7.857			0.951	0.049	0	7	5
AR0508.TrimmingFromTable.Nochr_._AR0514.TrimmingFromTable.Nochr	Unrelated	Third Degree	0.76			0.853	0.147	0	27	5
AR0508.TrimmingFromTable.Nochr_._AR0515.TrimmingFromTable.Nochr	Unrelated	Third Degree	7.994			0.947	0.053	0	10	4
AR0508.TrimmingFromTable.Nochr_._AR0516.TrimmingFromTable.Nochr	Unrelated	Third Degree	8.042			0.943	0.057	0	10	6
AR0508.TrimmingFromTable.Nochr_._AR0517.TrimmingFromTable.Nochr	Unrelated	Third Degree	17.654			1	0	0	0	1
AR0508.TrimmingFromTable.Nochr_._AR0518.TrimmingFromTable.Nochr	Unrelated	Third Degree	0.318			0.814	0.186	0	46	12
AR0508.TrimmingFromTable.Nochr_._AR0519.TrimmingFromTable.Nochr	Third Degree	Unrelated	1.814			0.746	0.254	0	65	12
AR0508.TrimmingFromTable.Nochr_._AR0520.TrimmingFromTable.Nochr	Unrelated	Third Degree	16.871			1	0	0	0	1
AR0508.TrimmingFromTable.Nochr_._AR0521.TrimmingFromTable.Nochr	Unrelated	Third Degree	8.903			0.95	0.05	0	8	4
AR0508.TrimmingFromTable.Nochr_._AR0522.TrimmingFromTable.Nochr	Unrelated	Third Degree	7.897			0.942	0.058	0	11	4
AR0508.TrimmingFromTable.Nochr_._AR0523.TrimmingFromTable.Nochr	Unrelated	Third Degree	0.433			0.817	0.183	0	46	10
AR0508.TrimmingFromTable.Nochr_._AR0524.TrimmingFromTable.Nochr	Third Degree	Unrelated	0.505			0.751	0.249	0	0	1
AR0508.TrimmingFromTable.Nochr_._AR0526.TrimmingFromTable.Nochr	Unrelated	Third Degree	9.818			0.962	0.038	0	3	3
AR0508.TrimmingFromTable.Nochr_._AR0527.TrimmingFromTable.Nochr	Unrelated	Third Degree	9.03			0.962	0.038	0	3	3
AR0508.TrimmingFromTable.Nochr_._AR0528.TrimmingFromTable.Nochr	Unrelated	Third Degree	8.678			0.944	0.056	0	10	5
AR0509.TrimmingFromTable.Nochr_._AR0510.TrimmingFromTable.Nochr	Unrelated	Third Degree	3.351			0.885	0.115	0	24	6
AR0509.TrimmingFromTable.Nochr_._AR0511.TrimmingFromTable.Nochr	Unrelated	Third Degree	6.245			0.918	0.082	0	16	6
AR0509.TrimmingFromTable.Nochr_._AR0512.TrimmingFromTable.Nochr	Unrelated	Third Degree	5.335			0.915	0.085	0	18	6
AR0509.TrimmingFromTable.Nochr_._AR0514.TrimmingFromTable.Nochr	Unrelated	Third Degree	9.258			0.959	0.041	0	8	5
AR0509.TrimmingFromTable.Nochr_._AR0515.TrimmingFromTable.Nochr	Unrelated	Third Degree	5.556			0.916	0.084	0	17	8
AR0509.TrimmingFromTable.Nochr_._AR0516.TrimmingFromTable.Nochr	Unrelated	Third Degree	8.625			0.938	0.062	0	14	6
AR0509.TrimmingFromTable.Nochr_._AR0517.TrimmingFromTable.Nochr	Unrelated	Third Degree	17.993			1	0	0	0	1
AR0509.TrimmingFromTable.Nochr_._AR0518.TrimmingFromTable.Nochr	Third Degree	Second Degree	0.584			0.637	0.363	0	102	16
AR0509.TrimmingFromTable.Nochr_._AR0519.TrimmingFromTable.Nochr	Unrelated	Third Degree	6.55			0.927	0.073	0	16	7
AR0509.TrimmingFromTable.Nochr_._AR0520.TrimmingFromTable.Nochr	Unrelated	Third Degree	16.917			1	0	0	0	1
AR0509.TrimmingFromTable.Nochr_._AR0521.TrimmingFromTable.Nochr	Unrelated	Third Degree	6.579			0.923	0.077	0	17	6
AR0509.TrimmingFromTable.Nochr_._AR0522.TrimmingFromTable.Nochr	Unrelated	Third Degree	9.098			0.949	0.051	0	8	5
AR0509.TrimmingFromTable.Nochr_._AR0523.TrimmingFromTable.Nochr	Unrelated	Third Degree	7.621			0.928	0.072	0	15	6
AR0509.TrimmingFromTable.Nochr_._AR0524.TrimmingFromTable.Nochr	Unrelated	Third Degree	5.67			1	0	0	0	1
AR0509.TrimmingFromTable.Nochr_._AR0526.TrimmingFromTable.Nochr	Unrelated	Third Degree	6.629			0.932	0.068	0	17	6
AR0509.TrimmingFromTable.Nochr_._AR0527.TrimmingFromTable.Nochr	Unrelated	Third Degree	4.052			0.919	0.081	0	10	4
AR0509.TrimmingFromTable.Nochr_._AR0528.TrimmingFromTable.Nochr	Unrelated	Third Degree	8.217			0.948	0.052	0	7	4
AR0510.TrimmingFromTable.Nochr_._AR0511.TrimmingFromTable.Nochr	Unrelated	Third Degree	3.068			0.876	0.124	0	24	7
AR0510.TrimmingFromTable.Nochr_._AR0512.TrimmingFromTable.Nochr	Unrelated	Third Degree	5.964			0.931	0.069	0	16	8
AR0510.TrimmingFromTable.Nochr_._AR0514.TrimmingFromTable.Nochr	Unrelated	Third Degree	6.228			0.919	0.081	0	17	7
AR0510.TrimmingFromTable.Nochr_._AR0515.TrimmingFromTable.Nochr	Third Degree	Unrelated	2.729			0.735	0.265	0	62	11
AR0510.TrimmingFromTable.Nochr_._AR0516.TrimmingFromTable.Nochr	Third Degree	Second Degree	1.765			0.738	0.262	0	64	16
AR0510.TrimmingFromTable.Nochr_._AR0517.TrimmingFromTable.Nochr	Unrelated	Third Degree	17.483			1	0	0	0	1
AR0510.TrimmingFromTable.Nochr_._AR0518.TrimmingFromTable.Nochr	Unrelated	Third Degree	7.718			0.931	0.069	0	15	8
AR0510.TrimmingFromTable.Nochr_._AR0519.TrimmingFromTable.Nochr	Unrelated	Third Degree	3.388			0.866	0.134	0	32	7
AR0510.TrimmingFromTable.Nochr_._AR0520.TrimmingFromTable.Nochr	Unrelated	Third Degree	13.772			1	0	0	0	1
AR0510.TrimmingFromTable.Nochr_._AR0521.TrimmingFromTable.Nochr	Unrelated	Third Degree	6.451			0.932	0.068	0	14	7
AR0510.TrimmingFromTable.Nochr_._AR0522.TrimmingFromTable.Nochr	Unrelated	Third Degree	4.269			0.901	0.099	0	22	7
AR0510.TrimmingFromTable.Nochr_._AR0523.TrimmingFromTable.Nochr	Unrelated	Third Degree	9.82			0.954	0.046	0	8	3
AR0510.TrimmingFromTable.Nochr_._AR0524.TrimmingFromTable.Nochr	Unrelated	Third Degree	2.037			0.882	0.118	0	7	1
AR0510.TrimmingFromTable.Nochr_._AR0526.TrimmingFromTable.Nochr	Unrelated	Third Degree	8.597			0.946	0.054	0	12	6
AR0510.TrimmingFromTable.Nochr_._AR0527.TrimmingFromTable.Nochr	Unrelated	Third Degree	2.881			0.881	0.119	0	30	12
AR0510.TrimmingFromTable.Nochr_._AR0528.TrimmingFromTable.Nochr	Unrelated	Third Degree	6.471			0.931	0.069	0	19	9
AR0511.TrimmingFromTable.Nochr_._AR0512.TrimmingFromTable.Nochr	Unrelated	Third Degree	7.931			0.937	0.063	0	17	5
AR0511.TrimmingFromTable.Nochr_._AR0514.TrimmingFromTable.Nochr	Unrelated	Third Degree	7.295			0.942	0.058	0	9	5
AR0511.TrimmingFromTable.Nochr_._AR0515.TrimmingFromTable.Nochr	Second Degree	Third Degree	11.617			0.408	0.592	0	179	20
AR0511.TrimmingFromTable.Nochr_._AR0516.TrimmingFromTable.Nochr	Second Degree	Third Degree	8.436			0.565	0.435	0	119	25
AR0511.TrimmingFromTable.Nochr_._AR0517.TrimmingFromTable.Nochr	Unrelated	Third Degree	16.356			1	0	0	0	1
AR0511.TrimmingFromTable.Nochr_._AR0518.TrimmingFromTable.Nochr	Unrelated	Third Degree	7.906			0.937	0.063	0	17	8
AR0511.TrimmingFromTable.Nochr_._AR0519.TrimmingFromTable.Nochr	Unrelated	Third Degree	6.799			0.929	0.071	0	10	6
AR0511.TrimmingFromTable.Nochr_._AR0520.TrimmingFromTable.Nochr	Unrelated	Third Degree	17.749			1	0	0	0	1
AR0511.TrimmingFromTable.Nochr_._AR0521.TrimmingFromTable.Nochr	Unrelated	Third Degree	5.391			0.929	0.071	0	9	6
AR0511.TrimmingFromTable.Nochr_._AR0522.TrimmingFromTable.Nochr	Unrelated	Third Degree	2.206			0.846	0.154	0	37	9
AR0511.TrimmingFromTable.Nochr_._AR0523.TrimmingFromTable.Nochr	Unrelated	Third Degree	7.989			0.934	0.066	0	13	4
AR0511.TrimmingFromTable.Nochr_._AR0524.TrimmingFromTable.Nochr	Unrelated	Third Degree	2.321			0.936	0.064	0	0	1
AR0511.TrimmingFromTable.Nochr_._AR0526.TrimmingFromTable.Nochr	Unrelated	Third Degree	8.316			0.947	0.053	0	6	2
AR0511.TrimmingFromTable.Nochr_._AR0527.TrimmingFromTable.Nochr	Unrelated	Third Degree	5.874			0.904	0.096	0	23	9
AR0511.TrimmingFromTable.Nochr_._AR0528.TrimmingFromTable.Nochr	Unrelated	Third Degree	8.108			0.943	0.057	0	10	5
AR0512.TrimmingFromTable.Nochr_._AR0514.TrimmingFromTable.Nochr	Unrelated	Third Degree	6.124			0.929	0.071	0	16	8
AR0512.TrimmingFromTable.Nochr_._AR0515.TrimmingFromTable.Nochr	Unrelated	Third Degree	7.775			0.944	0.056	0	10	5
AR0512.TrimmingFromTable.Nochr_._AR0516.TrimmingFromTable.Nochr	Unrelated	Third Degree	8.677			0.954	0.046	0	9	6
AR0512.TrimmingFromTable.Nochr_._AR0517.TrimmingFromTable.Nochr	Unrelated	Third Degree	17.796			1	0	0	0	1
AR0512.TrimmingFromTable.Nochr_._AR0518.TrimmingFromTable.Nochr	Unrelated	Third Degree	1.522			0.835	0.165	0	35	8
AR0512.TrimmingFromTable.Nochr_._AR0519.TrimmingFromTable.Nochr	Unrelated	Third Degree	9.787			0.959	0.041	0	9	4
AR0512.TrimmingFromTable.Nochr_._AR0520.TrimmingFromTable.Nochr	Unrelated	Third Degree	16.18			1	0	0	0	1
AR0512.TrimmingFromTable.Nochr_._AR0521.TrimmingFromTable.Nochr	Unrelated	Third Degree	6.438			0.929	0.071	0	17	8
AR0512.TrimmingFromTable.Nochr_._AR0522.TrimmingFromTable.Nochr	Unrelated	Third Degree	5.447			0.922	0.078	0	13	4
AR0512.TrimmingFromTable.Nochr_._AR0523.TrimmingFromTable.Nochr	Unrelated	Third Degree	16.974			1	0	0	0	1
AR0512.TrimmingFromTable.Nochr_._AR0524.TrimmingFromTable.Nochr	Unrelated	Third Degree	8.113			1	0	0	0	1
AR0512.TrimmingFromTable.Nochr_._AR0526.TrimmingFromTable.Nochr	Unrelated	Third Degree	8.146			0.941	0.059	0	13	6
AR0512.TrimmingFromTable.Nochr_._AR0527.TrimmingFromTable.Nochr	Unrelated	Third Degree	4.861			0.923	0.077	0	15	7
AR0512.TrimmingFromTable.Nochr_._AR0528.TrimmingFromTable.Nochr	Unrelated	Third Degree	6.23			0.931	0.069	0	17	7
AR0514.TrimmingFromTable.Nochr_._AR0515.TrimmingFromTable.Nochr	Unrelated	Third Degree	5.094			0.908	0.092	0	22	6
AR0514.TrimmingFromTable.Nochr_._AR0516.TrimmingFromTable.Nochr	Unrelated	Third Degree	5.092			0.903	0.097	0	21	7
AR0514.TrimmingFromTable.Nochr_._AR0517.TrimmingFromTable.Nochr	Unrelated	Third Degree	19.027			1	0	0	0	1
AR0514.TrimmingFromTable.Nochr_._AR0518.TrimmingFromTable.Nochr	Unrelated	Third Degree	4.905			0.914	0.086	0	16	6
AR0514.TrimmingFromTable.Nochr_._AR0519.TrimmingFromTable.Nochr	Third Degree	Unrelated	0.03			0.774	0.226	0	50	7
AR0514.TrimmingFromTable.Nochr_._AR0520.TrimmingFromTable.Nochr	Unrelated	Third Degree	17.727			1	0	0	0	1
AR0514.TrimmingFromTable.Nochr_._AR0521.TrimmingFromTable.Nochr	Unrelated	Third Degree	8.698			0.958	0.042	0	4	2
AR0514.TrimmingFromTable.Nochr_._AR0522.TrimmingFromTable.Nochr	Unrelated	Third Degree	10.126			0.955	0.045	0	9	4
AR0514.TrimmingFromTable.Nochr_._AR0523.TrimmingFromTable.Nochr	Third Degree	Unrelated	1.75			0.727	0.273	0	56	8
AR0514.TrimmingFromTable.Nochr_._AR0524.TrimmingFromTable.Nochr	Second Degree	Third Degree	4.243			0.482	0.518	0	192	6
AR0514.TrimmingFromTable.Nochr_._AR0526.TrimmingFromTable.Nochr	Unrelated	Third Degree	8.548			0.943	0.057	0	12	5
AR0514.TrimmingFromTable.Nochr_._AR0527.TrimmingFromTable.Nochr	Unrelated	Third Degree	7.128			0.933	0.067	0	13	6
AR0514.TrimmingFromTable.Nochr_._AR0528.TrimmingFromTable.Nochr	Unrelated	Third Degree	9.636			0.95	0.05	0	13	3
AR0515.TrimmingFromTable.Nochr_._AR0516.TrimmingFromTable.Nochr	Siblings	Second Degree	19.864	Parent-Child	27.85360769	0.231	0.588	0.182	179	28
AR0515.TrimmingFromTable.Nochr_._AR0517.TrimmingFromTable.Nochr	Unrelated	Third Degree	14.776			1	0	0	0	1
AR0515.TrimmingFromTable.Nochr_._AR0518.TrimmingFromTable.Nochr	Unrelated	Third Degree	5.585			0.921	0.079	0	15	6
AR0515.TrimmingFromTable.Nochr_._AR0519.TrimmingFromTable.Nochr	Unrelated	Third Degree	4.062			0.907	0.093	0	19	6
AR0515.TrimmingFromTable.Nochr_._AR0520.TrimmingFromTable.Nochr	Unrelated	Third Degree	15.858			1	0	0	0	1
AR0515.TrimmingFromTable.Nochr_._AR0521.TrimmingFromTable.Nochr	Unrelated	Third Degree	2.619			0.875	0.125	0	36	11
AR0515.TrimmingFromTable.Nochr_._AR0522.TrimmingFromTable.Nochr	Unrelated	Third Degree	5.519			0.914	0.086	0	18	7
AR0515.TrimmingFromTable.Nochr_._AR0523.TrimmingFromTable.Nochr	Unrelated	Third Degree	7.873			0.929	0.071	0	17	4
AR0515.TrimmingFromTable.Nochr_._AR0524.TrimmingFromTable.Nochr	Unrelated	Third Degree	1.926			0.93	0.07	0	0	1
AR0515.TrimmingFromTable.Nochr_._AR0526.TrimmingFromTable.Nochr	Unrelated	Third Degree	6.106			0.918	0.082	0	19	9
AR0515.TrimmingFromTable.Nochr_._AR0527.TrimmingFromTable.Nochr	Unrelated	Third Degree	6.111			0.921	0.079	0	17	8
AR0515.TrimmingFromTable.Nochr_._AR0528.TrimmingFromTable.Nochr	Unrelated	Third Degree	5.826			0.917	0.083	0	17	6
AR0516.TrimmingFromTable.Nochr_._AR0517.TrimmingFromTable.Nochr	Unrelated	Third Degree	12.787			0.987	0.013	0	3	2
AR0516.TrimmingFromTable.Nochr_._AR0518.TrimmingFromTable.Nochr	Unrelated	Third Degree	6.518			0.936	0.064	0	13	6
AR0516.TrimmingFromTable.Nochr_._AR0519.TrimmingFromTable.Nochr	Unrelated	Third Degree	4.74			0.9	0.1	0	27	9
AR0516.TrimmingFromTable.Nochr_._AR0520.TrimmingFromTable.Nochr	Unrelated	Third Degree	18.561			1	0	0	0	1
AR0516.TrimmingFromTable.Nochr_._AR0521.TrimmingFromTable.Nochr	Unrelated	Third Degree	2.348			0.866	0.134	0	29	7
AR0516.TrimmingFromTable.Nochr_._AR0522.TrimmingFromTable.Nochr	Unrelated	Third Degree	3.333			0.898	0.102	0	24	9
AR0516.TrimmingFromTable.Nochr_._AR0523.TrimmingFromTable.Nochr	Unrelated	Third Degree	5.376			0.896	0.104	0	31	11
AR0516.TrimmingFromTable.Nochr_._AR0524.TrimmingFromTable.Nochr	Unrelated	Third Degree	0.747			0.866	0.134	0	0	1
AR0516.TrimmingFromTable.Nochr_._AR0526.TrimmingFromTable.Nochr	Unrelated	Third Degree	6.573			0.917	0.083	0	21	9
AR0516.TrimmingFromTable.Nochr_._AR0527.TrimmingFromTable.Nochr	Unrelated	Third Degree	5.021			0.919	0.081	0	20	9
AR0516.TrimmingFromTable.Nochr_._AR0528.TrimmingFromTable.Nochr	Unrelated	Third Degree	5.775			0.911	0.089	0	21	7
AR0517.TrimmingFromTable.Nochr_._AR0518.TrimmingFromTable.Nochr	Unrelated	Third Degree	20.373			1	0	0	0	1
AR0517.TrimmingFromTable.Nochr_._AR0519.TrimmingFromTable.Nochr	Unrelated	Third Degree	15.643			1	0	0	0	1
AR0517.TrimmingFromTable.Nochr_._AR0520.TrimmingFromTable.Nochr	Unrelated	Third Degree	17.207			1	0	0	0	1
AR0517.TrimmingFromTable.Nochr_._AR0521.TrimmingFromTable.Nochr	Unrelated	Third Degree	17.225			1	0	0	0	1
AR0517.TrimmingFromTable.Nochr_._AR0522.TrimmingFromTable.Nochr	Unrelated	Third Degree	16.621			1	0	0	0	1
AR0517.TrimmingFromTable.Nochr_._AR0523.TrimmingFromTable.Nochr	Unrelated	Third Degree	19.896			1	0	0	0	1
AR0517.TrimmingFromTable.Nochr_._AR0524.TrimmingFromTable.Nochr	Unrelated	Third Degree	2.469			1	0	0	0	1
AR0517.TrimmingFromTable.Nochr_._AR0526.TrimmingFromTable.Nochr	Unrelated	Third Degree	18.384			1	0	0	0	1
AR0517.TrimmingFromTable.Nochr_._AR0527.TrimmingFromTable.Nochr	Unrelated	Third Degree	17.683			1	0	0	0	1
AR0517.TrimmingFromTable.Nochr_._AR0528.TrimmingFromTable.Nochr	Unrelated	Third Degree	18.503			1	0	0	0	1
AR0518.TrimmingFromTable.Nochr_._AR0519.TrimmingFromTable.Nochr	Unrelated	Third Degree	4.67			0.906	0.094	0	24	5
AR0518.TrimmingFromTable.Nochr_._AR0520.TrimmingFromTable.Nochr	Unrelated	Third Degree	16.927			1	0	0	0	1
AR0518.TrimmingFromTable.Nochr_._AR0521.TrimmingFromTable.Nochr	Unrelated	Third Degree	5.438			0.919	0.081	0	17	6
AR0518.TrimmingFromTable.Nochr_._AR0522.TrimmingFromTable.Nochr	Unrelated	Third Degree	6.27			0.928	0.072	0	13	6
AR0518.TrimmingFromTable.Nochr_._AR0523.TrimmingFromTable.Nochr	Unrelated	Third Degree	1.943			0.846	0.154	0	41	13
AR0518.TrimmingFromTable.Nochr_._AR0524.TrimmingFromTable.Nochr	Unrelated	Third Degree	3.352			0.938	0.062	0	0	1
AR0518.TrimmingFromTable.Nochr_._AR0526.TrimmingFromTable.Nochr	Unrelated	Third Degree	8.165			0.955	0.045	0	4	3
AR0518.TrimmingFromTable.Nochr_._AR0527.TrimmingFromTable.Nochr	Unrelated	Third Degree	5.088			0.91	0.09	0	25	8
AR0518.TrimmingFromTable.Nochr_._AR0528.TrimmingFromTable.Nochr	Unrelated	Third Degree	3.615			0.894	0.106	0	25	7
AR0519.TrimmingFromTable.Nochr_._AR0520.TrimmingFromTable.Nochr	Unrelated	Third Degree	17.222			1	0	0	0	1
AR0519.TrimmingFromTable.Nochr_._AR0521.TrimmingFromTable.Nochr	Unrelated	Third Degree	6.864			0.931	0.069	0	15	7
AR0519.TrimmingFromTable.Nochr_._AR0522.TrimmingFromTable.Nochr	Unrelated	Third Degree	10.939			0.968	0.032	0	7	3
AR0519.TrimmingFromTable.Nochr_._AR0523.TrimmingFromTable.Nochr	Second Degree	Third Degree	10.274			0.409	0.591	0	169	20
AR0519.TrimmingFromTable.Nochr_._AR0524.TrimmingFromTable.Nochr	Second Degree	Third Degree	6.422			0.425	0.575	0	183	5
AR0519.TrimmingFromTable.Nochr_._AR0526.TrimmingFromTable.Nochr	Unrelated	Third Degree	9.737			0.946	0.054	0	11	4
AR0519.TrimmingFromTable.Nochr_._AR0527.TrimmingFromTable.Nochr	Unrelated	Third Degree	8.146			0.95	0.05	0	9	4
AR0519.TrimmingFromTable.Nochr_._AR0528.TrimmingFromTable.Nochr	Unrelated	Third Degree	10.19			0.963	0.037	0	5	3
AR0520.TrimmingFromTable.Nochr_._AR0521.TrimmingFromTable.Nochr	Unrelated	Third Degree	18.295			1	0	0	0	1
AR0520.TrimmingFromTable.Nochr_._AR0522.TrimmingFromTable.Nochr	Unrelated	Third Degree	16.759			1	0	0	0	1
AR0520.TrimmingFromTable.Nochr_._AR0523.TrimmingFromTable.Nochr	Unrelated	Third Degree	19.098			1	0	0	0	1
AR0520.TrimmingFromTable.Nochr_._AR0524.TrimmingFromTable.Nochr	Unrelated	Third Degree	4.287			1	0	0	0	1
AR0520.TrimmingFromTable.Nochr_._AR0526.TrimmingFromTable.Nochr	Unrelated	Third Degree	16.652			1	0	0	0	1
AR0520.TrimmingFromTable.Nochr_._AR0527.TrimmingFromTable.Nochr	Unrelated	Third Degree	17.514			1	0	0	0	1
AR0520.TrimmingFromTable.Nochr_._AR0528.TrimmingFromTable.Nochr	Unrelated	Third Degree	11.394			1	0	0	0	1
AR0521.TrimmingFromTable.Nochr_._AR0522.TrimmingFromTable.Nochr	Third Degree	Unrelated	0.149			0.787	0.213	0	55	14
AR0521.TrimmingFromTable.Nochr_._AR0523.TrimmingFromTable.Nochr	Unrelated	Third Degree	8.378			0.93	0.07	0	15	5
AR0521.TrimmingFromTable.Nochr_._AR0524.TrimmingFromTable.Nochr	Unrelated	Third Degree	2.742			0.938	0.062	0	0	1
AR0521.TrimmingFromTable.Nochr_._AR0526.TrimmingFromTable.Nochr	Unrelated	Third Degree	5.81			0.919	0.081	0	16	6
AR0521.TrimmingFromTable.Nochr_._AR0527.TrimmingFromTable.Nochr	Unrelated	Third Degree	8.257			0.956	0.044	0	5	4
AR0521.TrimmingFromTable.Nochr_._AR0528.TrimmingFromTable.Nochr	Unrelated	Third Degree	1.896			0.847	0.153	0	32	8
AR0522.TrimmingFromTable.Nochr_._AR0523.TrimmingFromTable.Nochr	Unrelated	Third Degree	12.67			1	0	0	0	1
AR0522.TrimmingFromTable.Nochr_._AR0524.TrimmingFromTable.Nochr	Unrelated	Third Degree	3.447			0.94	0.06	0	0	1
AR0522.TrimmingFromTable.Nochr_._AR0526.TrimmingFromTable.Nochr	Unrelated	Third Degree	5.739			0.916	0.084	0	19	5
AR0522.TrimmingFromTable.Nochr_._AR0527.TrimmingFromTable.Nochr	Unrelated	Third Degree	5.816			0.918	0.082	0	11	3
AR0522.TrimmingFromTable.Nochr_._AR0528.TrimmingFromTable.Nochr	Unrelated	Third Degree	1.81			0.835	0.165	0	48	11
AR0523.TrimmingFromTable.Nochr_._AR0524.TrimmingFromTable.Nochr	Second Degree	Third Degree	6.307			0.423	0.577	0	175	8
AR0523.TrimmingFromTable.Nochr_._AR0526.TrimmingFromTable.Nochr	Unrelated	Third Degree	12.885			1	0	0	0	1
AR0523.TrimmingFromTable.Nochr_._AR0527.TrimmingFromTable.Nochr	Unrelated	Third Degree	6.68			0.931	0.069	0	8	3
AR0523.TrimmingFromTable.Nochr_._AR0528.TrimmingFromTable.Nochr	Unrelated	Third Degree	9.793			0.947	0.053	0	13	5
AR0524.TrimmingFromTable.Nochr_._AR0526.TrimmingFromTable.Nochr	Unrelated	Third Degree	3.44			0.935	0.065	0	0	1
AR0524.TrimmingFromTable.Nochr_._AR0527.TrimmingFromTable.Nochr	Unrelated	Third Degree	0.806			0.874	0.126	0	0	1
AR0524.TrimmingFromTable.Nochr_._AR0528.TrimmingFromTable.Nochr	Unrelated	Third Degree	2.343			0.936	0.064	0	0	1
AR0526.TrimmingFromTable.Nochr_._AR0527.TrimmingFromTable.Nochr	Unrelated	Third Degree	9.812			0.96	0.04	0	2	2
AR0526.TrimmingFromTable.Nochr_._AR0528.TrimmingFromTable.Nochr	Unrelated	Third Degree	7.091			0.936	0.064	0	13	7
AR0527.TrimmingFromTable.Nochr_._AR0528.TrimmingFromTable.Nochr	Unrelated	Third Degree	4.05			0.9	0.1	0	17	9

## Sheet: B. KIN on SG
Population	X	N	Ne	std.err	lower	upper	Region	Color	Point	mean	x
Chile_LosRieles_12000BP.Capt	0	1	10005995	16571	6691795	13320195	CentralChile_EH	brown1	21	10005995	1
USA_CA_SantaRosa_7400BP.Capt	0	1	1334705	244835	845035	1824375	California_NorthernChannelIslands_MH	violet	21	1334705	2
Chile_WesternArchipelago_Kaweskar_800BP.SG	8	1	12148415	21624	7823615	16473215	SouthPatagonia_LH	blue1	10	190551225	3
Chile_WesternArchipelago_Kaweskar_1200BP.SG	7	1	13594935	25269	8541135	18648735	SouthPatagonia_LH	blue1	9	190551225	4
Argentina_BeagleChannel_Yamana_100BP.Capt	0	2	1671719	234855	1202009	2141429	SouthPatagonia_LH	blue1	1	190551225	5
Chile_NorthTierradelFuego_Selknam_100BP.Capt	5	1	17745655	360235	10540955	24950355	SouthPatagonia_LH	blue1	6	190551225	6
Argentina_BeagleChannel_Yamana_100BP.SG	1	2	18097095	26176	12861895	23332295	SouthPatagonia_LH	blue1	1	190551225	7
Argentina_BeagleChannel_Yamana_1500BP.Capt	2	1	2078357	451095	1176167	2980547	SouthPatagonia_LH	blue1	2	190551225	8
Chile_Yamana_BeagleChannel_800BP.SG	9	2	2084265	31979	1444685	2723845	SouthPatagonia_LH	blue1	11	190551225	9
Argentina_NorthTierradelFuego_Selknam_500BP.Capt	4	2	20880295	320315	14473995	27286595	SouthPatagonia_LH	blue1	5	190551225	10
Argentina_MitrePeninsula_Haush_400BP.Capt	3	3	23027665	29949	17037865	29017465	SouthPatagonia_LH	blue1	3	190551225	11
Chile_SouthernContinent_Aonikenk_400BP.Capt	6	1	26713755	642745	13858855	39568655	SouthPatagonia_LH	blue1	7	190551225	12
Brazil_Cabecuda_3200BP.Capt	0	1	2005675	427345	1150985	2860365	Brazil_LH	palegreen1	10	213442825	13
Brazil_JabuticabeiraII_2400BP.Capt	2	10	22631815	16069	19418015	25845615	Brazil_LH	palegreen1	13	213442825	14
Argentina_NorthTierradelFuego_LaArcillosa2_5800BP.Capt	0	1	177627	36055	105517	249737	SouthPatagonia_MH	blue3	21	2141832	15
Chile_PuntaSantaAna_7300BP.SG	1	1	2507394	59005	1327294	3687494	SouthPatagonia_MH	blue3	22	2141832	16
USA_CA_SanClemente_500BP.Capt	1	5	1494687	12795	1238787	1750587	California_SouthernChannelIslands_LH	violet	9	228669067	17
USA_CA_SanCatalina_400BP.SG	0	1	22824585	51457	12533185	33115985	California_SouthernChannelIslands_LH	violet	6	228669067	18
USA_CA_SanClemente_900BP.SG	2	2	30829265	559355	19642165	42016365	California_SouthernChannelIslands_LH	violet	7	228669067	19
Argentina_ArroyoSeco2_7700BP.Capt	0	2	2391408	38925	1612908	3169908	Pampa_MH	lightblue	22	2391408	20
Chile_LosRieles_5100BP.Capt	0	1	3197706	83188	1533946	4861466	CentralChile_MH	brown1	23	3197706	21
Brazil_LapaDoSanto_9600BP.Capt	1	4	2829372	348775	2131822	3526922	Brazil_EH	palegreen1	21	335912913	22
Brazil_Sumidouro_10100BP.SG	2	2	29132215	514405	18844115	39420315	Brazil_EH	palegreen1	22	335912913	23
Brazil_Sumidouro_10400BP.SG	3	1	3410422	914105	1582212	5238632	Brazil_EH	palegreen1	22	335912913	24
Brazil_LapaDoSanto_9200BP.Capt	0	1	4283501	1273975	1735551	6831451	Brazil_EH	palegreen1	21	335912913	25
Migrant	0	9	33942125	303345	27875225	40009025	Migrant	goldenrod1	21	33942125	26
USA_CA_Goleta_4700BP.Capt	0	1	34264315	918125	15901815	52626815	California_SouthernMainland_MH	palevioletred3	21	34264315	27
Peru_Cuncaicha_4200BP.Capt	1	1	31775785	82.7	15235785	48315785	CentralAndes_MH	orange4	21	3886337	28
Peru_Lauricocha_5800BP.Capt	4	1	3197948	831935	1534078	4861818	CentralAndes_MH	orange4	24	3886337	29
Peru_Cuncaicha_3300BP_contam.Capt	0	1	33806485	90664	15673685	51939285	CentralAndes_MH	orange4	25	3886337	30
Peru_Lauricocha_3500BP.Capt	3	1	5789173	1972605	1843963	9734383	CentralAndes_MH	orange4	23	3886337	31
Peru_Lauricocha_8600BP.Capt	1	2	2134051	33041	1473231	2794871	CentralAndes_EH	darkorange4	22	394386325	32
Peru_Cuncaicha_9000BP.Capt	0	1	57536755	1960955	18317655	96755855	CentralAndes_EH	darkorange4	21	394386325	33
USA_CA_SantaRosa_3000BP.Capt	2	1	1914369	401265	1111839	2716899	California_NorthernChannelIslands_LH	violet	3	39787295	34
USA_CA_SantaRosa_300BP.Capt	3	5	3519059	427035	2664989	4373129	California_NorthernChannelIslands_LH	violet	4	39787295	35
USA_CA_SanMiguel_650BP.SG	0	1	46993525	1455865	17876225	76110825	California_NorthernChannelIslands_LH	violet	1	39787295	36
USA_CA_SantaCruz_1000BP.SG	1	1	57821375	197.03	18415375	97227375	California_NorthernChannelIslands_LH	violet	2	39787295	37
Local_Late	1	1	43096745	128136	17469545	68723945	Local_Late	darkorange4	21	43096745	38
USA_CA_Carmel_600BP.Capt	2	1	24012695	55254	12961895	35063495	California_Central_LH	palevioletred1	6	444424567	39
USA_CA_CalaverasCounty_600BP.Capt	1	4	51574195	835935	34855495	68292895	California_Central_LH	palevioletred1	7	444424567	40
USA_CA_CalaverasCounty_1500BP.Capt	0	1	5774048	196764	1838768	9709328	California_Central_LH	palevioletred1	8	444424567	41
Belize_7400BP.Capt	3	1	3202348	83.3	1536348	4868348	CentralAmerica_MH	mediumvioletred	24	46330665	42
Belize_4900BP.Capt	1	3	3753335	606435	2540465	4966205	CentralAmerica_MH	darkviolet	21	46330665	43
Belize_4600BP.Capt	0	4	69435165	129122	43610765	95259565	CentralAmerica_MH	darkviolet	22	46330665	44
USA_CA_Goleta_400BP.Capt	0	1	39739105	1137985	16979405	62498805	California_SouthernMainland_LH	palevioletred3	6	499609875	45
USA_CA_NewCuyama_1300BP.SG	2	1	4721558	1462435	1796688	7646428	California_SouthernMainland_LH	palevioletred3	1	499609875	46
USA_CA_PointSal_1500BP.SG	3	1	517668	167785	182098	853238	California_SouthernMainland_LH	palevioletred3	2	499609875	47
USA_CA_Goleta_900BP.Capt	1	2	61122465	151371	30848265	91396665	California_SouthernMainland_LH	palevioletred3	5	499609875	48
Peru_Chanka_LIP.Capt	1	1	36536095	1011205	16311995	56760195	CentralAndes_LateIntermediate_LH	orange1	4	512439783	49
Peru_Ollantaytambo_LIP.Capt	5	5	4778172	667835	3442502	6113842	CentralAndes_LateIntermediate_LH	orange1	13	512439783	50
Peru_LIP_Pacapaccari_600BP.Capt	4	2	6941412	1825525	3290362	10592462	CentralAndes_LateIntermediate_LH	orange1	8	512439783	51
Peru_Kanamarka1_LH.Capt	2	1	5185731	1680665	1824401	8547061	CentralAndes_LateHorizon_LH	darkorange2	5	5185731	52
Peru_Laramate_900BP.Capt	4	3	5008583	92277	3163043	6854123	CentralAndes_MiddleHorizon_LH	orange2	8	539457225	53
Bolivia_MH_Iroco_1050BP.Capt	0	1	57805615	196978	18410015	97201215	CentralAndes_MiddleHorizon_LH	orange2	1	539457225	54
Peru_RioUncallane_1600BP.SG	0	4	6292219	1117795	4056629	8527809	CentralAndes_EarlyIntermediate_LH	darkorange1	3	6292219	55

## Sheet: C. READv2 on 1240K
PairIndividuals	Norm2AlleleDiff	StError_2Allele_Norm	Nonnormalized_P0	Nonnormalized_P0_serr	OverlapNSNPs
AR0149.AR0151	9877692573	1192596272	3546361561	4281746518	40292
AR0149.AR0152	1056300192	1295321781	3792406343	4650559165	15829
AR0149.AR0161	1017996759	9814830772	365488655	3523792456	37153
AR0149.AR0162	1025090765	8554148029	3680355972	3071172901	79332
AR0149.AR0180	1019655645	1519657141	3660842407	545598441	11847
AR0149.AR0195	1008720339	31768146	362158167	1140563254	2706
AR0149.AR0500and513	1022975236	9255826905	3672760643	3323094792	55574
AR0149.AR0501	102126043	1079023204	3666604022	3873988168	31926
AR0149.AR0503	1052531076	2536990896	3778874187	9108490596	4459
AR0149.AR0504	1043419953	7875690539	3746162767	2827588122	117272
AR0149.AR0505	103410847	8320071529	3712731997	2987133041	116219
AR0149.AR0506	1031088043	8563863405	3701887837	3074660986	61393
AR0149.AR0507	101548481	9201210433	3645867967	3303485986	54138
AR0149.AR0508	1018687801	9513594467	365736758	3415640391	65096
AR0149.AR0509	1019528449	8695772288	3660385738	312201988	94572
AR0149.AR0510	1025678004	7909386085	3682464322	2839685743	106999
AR0149.AR0511	1022630194	9103919035	3671521848	3268555715	71676
AR0149.AR0512	1034930983	8398193707	3715685043	3015181038	119445
AR0149.AR0514	1028870812	857498937	3693927373	3078655512	65540
AR0149.AR0515	1021881636	8427548255	366883432	3025720122	103030
AR0149.AR0516	1013643182	8288551151	3639256021	2975816363	99949
AR0149.AR0517	1030206727	9840460063	3698723672	3532994072	38078
AR0149.AR0518	1016929251	8292782371	3651053907	2977335487	109782
AR0149.AR0519	1024824181	7778873641	3679398861	279282821	108727
AR0149.AR0520	1043280486	1027782089	374566204	3690018561	29968
AR0149.AR0521	1022794228	9362053293	3672110776	3361232968	78862
AR0149.AR0522	103622531	8492801088	3720332031	3049147673	71921
AR0149.AR0523	1030970467	8132530577	3701465709	2919800714	104591
AR0149.AR0524	9793245576	42297682	3516042781	151860237	1496
AR0149.AR0526	1028970737	8724583584	3694286132	3132363923	95802
AR0149.AR0527	1016718169	8539404903	3650296064	3065879716	71775
AR0149.AR0528	1021215637	9025810356	3666443203	3240512565	67125
AR0151.AR0152	1021878007	1225025839	3668821293	4398177523	26300
AR0151.AR0161	1028963244	1019291391	3694259229	3659534636	61490
AR0151.AR0162	102491811	8034624765	3679736094	2884649852	129743
AR0151.AR0180	101545759	1372522626	364577024	4927731294	19812
AR0151.AR0195	1009302062	2473327408	3623670213	8879921279	4512
AR0151.AR0500and513	1029061712	772730567	3694612758	2774313899	90770
AR0151.AR0501	1024838808	8391517688	3679451378	3012784164	52641
AR0151.AR0503	1007162064	1866375659	3615987038	6700798638	7406
AR0151.AR0504	1045503422	7399725358	375364299	2656703615	192493
AR0151.AR0505	1041265736	7603977828	3738428536	2730035833	190663
AR0151.AR0506	1034339257	787232987	3713560587	282638155	100475
AR0151.AR0507	1024856573	8928840588	3679515157	3205697769	88441
AR0151.AR0508	1028043444	9080486823	3690956897	3260142911	106490
AR0151.AR0509	1030232121	7129102562	3698814846	2559542636	155001
AR0151.AR0510	1019353023	7473009036	365975591	2683014458	175427
AR0151.AR0511	1028039488	7721609582	3690942692	2772268848	116878
AR0151.AR0512	1039890656	7556910129	3733491624	2713137243	196264
AR0151.AR0514	1029611093	8736048515	3696585184	3136480146	107180
AR0151.AR0515	1025341714	7581235397	3681256948	2721870679	169108
AR0151.AR0516	1027093739	7396751153	3687547197	2655635794	164204
AR0151.AR0517	1038220849	8811418486	3727496563	3163540025	62546
AR0151.AR0518	1032929243	758361957	3708498249	2722726662	180143
AR0151.AR0519	1027729226	8053765694	3689828768	2891521969	178179
AR0151.AR0520	1032768015	9294257656	3707919398	3336892482	49726
AR0151.AR0521	1032776441	815587741	3707949648	2928182865	129012
AR0151.AR0522	1023369754	8342860791	3674177071	2995315008	117659
AR0151.AR0523	1025184641	7559118523	3680693012	2713930117	171772
AR0151.AR0524	9963216224	3202264492	3577066888	1149700461	2407
AR0151.AR0526	102022521	7473769861	36628873	2683287615	157081
AR0151.AR0527	102338247	8425696131	3674222726	3025055159	117301
AR0151.AR0528	1032310641	7906124455	3706277298	2838514729	110812
AR0152.AR0161	997833111	1277571746	3582493545	4586831688	24014
AR0152.AR0162	1023685869	896474068	3675312012	3218586883	51280
AR0152.AR0180	1010200646	180489946	3626896374	6480082283	7778
AR0152.AR0195	104184255	3785363178	3740499457	1359048823	1842
AR0152.AR0500and513	100768819	1072458841	3617875973	385042031	35847
AR0152.AR0501	1000093478	1338626243	359060888	4806034018	20743
AR0152.AR0503	1019230832	3178522565	3659317212	114117646	2812
AR0152.AR0504	1029021463	896334763	3694468253	321808674	75835
AR0152.AR0505	10450172	8908806397	3751897318	3198504947	75106
AR0152.AR0506	1022068155	1013609709	3669503977	3639135842	39474
AR0152.AR0507	1015524253	1106897337	3646009578	3974063921	34871
AR0152.AR0508	1029127021	1031814807	3694847233	370449712	41861
AR0152.AR0509	1001173569	9345194126	3594486701	3355180067	60871
AR0152.AR0510	1010979854	9097597049	3629693944	326628595	69105
AR0152.AR0511	1025578692	9931691511	3682107764	3565748655	46305
AR0152.AR0512	1041009093	9303195375	373750712	3340101367	77244
AR0152.AR0514	1016040332	1068988846	3647862443	3837962077	42455
AR0152.AR0515	1034560318	9504029502	3714354254	3412206307	66698
AR0152.AR0516	10248262	9361521281	3679406112	3361041961	64524
AR0152.AR0517	1043691506	1224576127	3747137717	4396562936	24456
AR0152.AR0518	1014911329	9770701387	3643809015	3507948801	71063
AR0152.AR0519	1022117642	9085226078	3669681647	3261844433	70205
AR0152.AR0520	1020524372	1346786355	3663961373	4835331049	19468
AR0152.AR0521	1011832865	1002901702	3632756487	3600691173	50909
AR0152.AR0522	1011826511	1009693238	3632733674	3625074643	46582
AR0152.AR0523	1016935908	8929284799	3651077806	3205857253	67591
AR0152.AR0524	1064082323	5010612589	382034632	1798946844	924
AR0152.AR0526	1021426558	9319980188	3667200466	3346127574	61821
AR0152.AR0527	1002795731	1052328191	3600310706	3778145776	46346
AR0152.AR0528	1025582302	1041931933	3682120725	3740820368	43570
AR0161.AR0162	7469200985	7794218391	2681647264	2798337394	121802
AR0161.AR0180	1003117382	128939093	3601465522	4629265789	18287
AR0161.AR0195	100120905	2455058758	359461409	8814331833	4159
AR0161.AR0500and513	1013723317	8174582009	3639543726	2934898327	85475
AR0161.AR0501	1015590064	946955415	3646245858	3399828713	49492
AR0161.AR0503	1030815864	1859649384	3700910643	6676649472	7028
AR0161.AR0504	1029098422	7819256635	3694744556	2807326808	180118
AR0161.AR0505	1025137692	8406975118	3680524454	3018333804	178624
AR0161.AR0506	1007467058	8677897348	3617082046	3115602288	94532
AR0161.AR0507	9988335672	8887427806	3586085457	3190829448	83481
AR0161.AR0508	1009405801	8763292997	3624042664	314626166	99756
AR0161.AR0509	1012137446	8032901187	3633850015	288403104	145028
AR0161.AR0510	1021924688	8205699854	3668988889	2946070484	164067
AR0161.AR0511	994876166	8852212546	3571877305	3178186208	109833
AR0161.AR0512	1026907055	8704099742	368687695	3125009664	183372
AR0161.AR0514	1001675009	797559344	3596287011	2863455993	100512
AR0161.AR0515	1004211703	8187140075	3605394435	2939407016	158163
AR0161.AR0516	1013590944	8140665899	3639068471	2922721517	153597
AR0161.AR0517	1030899608	8963488842	3701211306	3218137439	58697
AR0161.AR0518	1005021506	9142400432	3608301847	3282371589	168589
AR0161.AR0519	1020431285	7459368882	3663627165	267811727	167023
AR0161.AR0520	1013579075	1044173094	3639025861	3748866748	46441
AR0161.AR0521	1003117803	772044759	3601467033	2771851661	121606
AR0161.AR0522	1005526656	8364496608	3610115474	3003082858	110761
AR0161.AR0523	1011266218	7715914067	363072207	2770224002	160497
AR0161.AR0524	1006538824	329902558	3613749435	1184440335	2211
AR0161.AR0526	1007187685	8877790884	3616079021	318736953	146999
AR0161.AR0527	100559542	917127867	3610362357	3292739665	110554
AR0161.AR0528	1012781429	8495725195	3636162091	3050197507	103744
AR0162.AR0180	1015006354	1014757734	364415018	3643257568	38061
AR0162.AR0195	9956118777	1779870328	3574518711	6390220862	9246
AR0162.AR0500and513	1014215161	7745102765	3641309581	2780703542	186930
AR0162.AR0501	1007950254	8247275822	3618816853	2960997393	108541
AR0162.AR0503	9973606586	1423552262	3580797312	5110941634	15477
AR0162.AR0504	1041324098	7069091094	3738638072	2537996879	392429
AR0162.AR0505	1025046901	7502989997	3680198487	2693778443	389748
AR0162.AR0506	1009546709	7447066933	3624548564	2673700534	209055
AR0162.AR0507	1001419235	8570667335	3595368711	3077103783	183016
AR0162.AR0508	1014080267	7670047584	3640825275	2753756681	219854
AR0162.AR0509	1021506405	6818023409	3667487141	2447856719	316890
AR0162.AR0510	1029462338	681232222	3696051115	2445809837	357468
AR0162.AR0511	1000854405	7709875381	3593340816	2768055949	240570
AR0162.AR0512	1026417154	6994318459	3685118072	251115146	398994
AR0162.AR0514	1015931073	7424599845	3647470173	2665634236	219936
AR0162.AR0515	1012366361	7865447476	3634671885	2823910582	344452
AR0162.AR0516	1018361534	7224514351	3656196193	2593798076	334528
AR0162.AR0517	1035656938	7387340926	3718291419	2652257266	128317
AR0162.AR0518	1016074779	7737628738	3647986119	2778020162	366531
AR0162.AR0519	1023500816	680496409	367464762	2443168067	363741
AR0162.AR0520	1034802405	8860295784	3715223413	3181088311	99636
AR0162.AR0521	1008576748	7167965855	3621066138	257349562	266532
AR0162.AR0522	1018602605	7415337378	3657061705	2662308757	242930
AR0162.AR0523	1019517214	7418976308	36603454	2663615232	349508
AR0162.AR0524	9899372316	2290806228	355414518	8224620366	5042
AR0162.AR0526	1025226143	7860874264	3680842016	2822268674	322179
AR0162.AR0527	1007016887	6952838005	361546581	2496258843	243479
AR0162.AR0528	1020971759	7125234376	3665567614	2558153851	228985
AR0180.AR0195	9820893875	424348692	3525969276	1523527766	1367
AR0180.AR0500and513	1002291916	1124202349	3598501873	4036193642	26700
AR0180.AR0501	1000001004	1394751894	3590276875	5007540442	15386
AR0180.AR0503	1009412625	3448390329	3624067164	1238066362	2144
AR0180.AR0504	1016528285	9897481875	3649614328	3553466461	56395
AR0180.AR0505	1025072045	977964421	3680288762	3511159519	55963
AR0180.AR0506	9923221601	1107942855	3562707726	3977817614	29486
AR0180.AR0507	1007621931	1150548876	3617638084	4130784873	26216
AR0180.AR0508	100975974	1170100972	3625313403	4200982244	31509
AR0180.AR0509	1003777195	9265492531	360383443	3326565016	45274
AR0180.AR0510	9982865449	1008739792	3584121497	362165151	51491
AR0180.AR0511	1002961202	1101336399	3600904794	3954098632	34483
AR0180.AR0512	1021581373	1016567264	3667756294	3649754275	57512
AR0180.AR0514	101337406	1154179361	3638289798	4143819309	31622
AR0180.AR0515	1014636593	9766819733	3642822639	3506555181	49684
AR0180.AR0516	1010131126	9228542432	3626646781	3313298921	48276
AR0180.AR0517	1023532311	1405373811	3674760694	5045676028	18491
AR0180.AR0518	1020137304	975313038	3662571694	3501640329	52829
AR0180.AR0519	1006163747	1022449634	3612402805	3670873591	52472
AR0180.AR0520	1015216413	1462048826	364490435	5249154819	14689
AR0180.AR0521	1008101995	104091315	3619361646	3737162657	37910
AR0180.AR0522	1006796376	1176499788	3614674118	4223955741	34537
AR0180.AR0523	1014270826	1004812315	3641509434	3607550797	50350
AR0180.AR0524	1094226298	5789269151	3928571429	2078505828	728
AR0180.AR0526	1018481171	9914692551	3656625722	3559645564	46078
AR0180.AR0527	1006037797	1076590516	3611950609	3865254151	34743
AR0180.AR0528	1007000199	1146354748	3615405896	4115726809	32533
AR0195.AR0500and513	9745300086	2031350739	349882904	7293104259	6405
AR0195.AR0501	9621004699	26208333	3454203599	9409507741	3723
AR0195.AR0503	7897835457	5920755753	2835538752	2125713111	529
AR0195.AR0504	1002651305	1543764691	3599792177	5542537103	13473
AR0195.AR0505	7622584785	1398320009	2736716239	5020350952	13381
AR0195.AR0506	9917189158	1984788906	3560541914	7125934553	7086
AR0195.AR0507	720421298	191208996	2586509329	6864925472	6271
AR0195.AR0508	9981411735	1948941894	3583599574	6997233984	7512
AR0195.AR0509	9483998532	1660591965	3405014641	5961978942	10928
AR0195.AR0510	9062329071	1520094853	3253623782	5457555918	12211
AR0195.AR0511	7492038829	1663200281	2689846674	5971343509	8283
AR0195.AR0512	9975602301	1424555504	3581513828	5114543547	13740
AR0195.AR0514	9932801987	1863910865	3566147346	6691949354	7574
AR0195.AR0515	6953294841	150889381	249642286	5417341113	11881
AR0195.AR0516	8012351454	1604505147	2876653125	576061194	11569
AR0195.AR0517	1041704709	2431018977	3740004569	872802245	4377
AR0195.AR0518	9706794138	1499634977	3485004352	5384099372	12637
AR0195.AR0519	9704389552	1602997218	348414104	5755198062	12422
AR0195.AR0520	1065016264	2753480925	3823699422	9885748964	3460
AR0195.AR0521	9435393409	1773193698	3387564074	6366249935	8974
AR0195.AR0522	9600713321	182574023	344691844	6554906345	8129
AR0195.AR0523	9746702838	1574312818	3499332666	5652213226	11988
AR0195.AR0524	1037081018	1023226966	3723404255	3673664423	188
AR0195.AR0526	9852067749	1649641888	3537161548	5922665173	11006
AR0195.AR0527	9466741375	1764924579	339881885	6336561537	8297
AR0195.AR0528	9601778229	1838038982	3447300771	6599062223	7780
AR0500and513.AR0501	974076633	9235780698	3497201297	3315897656	76464
AR0500and513.AR0503	9931120808	1649766441	3565543757	5923112354	10924
AR0500and513.AR0504	9790049307	8185692028	3514895233	2938887128	273846
AR0500and513.AR0505	1007437713	7544419907	3616976693	2708652912	272020
AR0500and513.AR0506	9795978624	8779594313	351702402	3152114278	146587
AR0500and513.AR0507	9745198459	945811439	3498792553	3395721527	128370
AR0500and513.AR0508	9879517784	8594172564	3547016861	3085542803	154200
AR0500and513.AR0509	9873246587	7576857287	354476533	2720298818	221332
AR0500and513.AR0510	9769519483	80188175	3507524465	2878974612	250051
AR0500and513.AR0511	9809164781	8721328764	352175821	3131195353	168626
AR0500and513.AR0512	1003754265	7732694797	3603752105	2776248743	278457
AR0500and513.AR0514	9921187676	7855129641	3561977491	2820206198	154782
AR0500and513.AR0515	9777629976	7808796766	3510436354	2803571429	240745
AR0500and513.AR0516	9915456388	8118744783	3559919802	2914851237	233921
AR0500and513.AR0517	1047464491	8296461815	3760683761	2978656508	90207
AR0500and513.AR0518	989603489	8203332516	3552946954	2945220545	256587
AR0500and513.AR0519	9851482185	7443592069	3536951315	2672452963	254267
AR0500and513.AR0520	1020518652	864874707	3663940838	3105136542	70315
AR0500and513.AR0521	9798235926	8479462141	3517834453	3044358626	186521
AR0500and513.AR0522	9657735746	890486517	3467391049	3197089939	170076
AR0500and513.AR0523	981320157	7851003657	3523207528	2818724857	244425
AR0500and513.AR0524	9984746945	2736803781	3584797005	9825873456	3473
AR0500and513.AR0526	9973650268	8321379042	3580812995	2987602473	225069
AR0500and513.AR0527	9741102509	8238166814	3497321995	295772701	170276
AR0500and513.AR0528	9384851459	9340512088	3369418133	3353499087	160363
AR0501.AR0503	9763052583	2111857663	3505202671	7582146114	6439
AR0501.AR0504	9507726806	9502961929	341353374	3411823019	159143
AR0501.AR0505	9859750369	8345861357	3539919819	2996392294	158142
AR0501.AR0506	9911588813	9595157379	3558531237	3444923705	85732
AR0501.AR0507	975438731	8802444193	3502091601	3160318009	74584
AR0501.AR0508	9982783137	856215161	3584091945	3074046405	89967
AR0501.AR0509	9698329414	7670794371	3481965285	2754024798	129223
AR0501.AR0510	1001716411	8915924243	3596435654	3201060448	145216
AR0501.AR0511	9583808815	9037789031	344084926	3244813237	98156
AR0501.AR0512	9370353001	9337616662	336421279	335245955	161812
AR0501.AR0514	9917850018	7685458315	356077918	2759289555	90146
AR0501.AR0515	987223794	8276121211	3544403198	2971353676	140080
AR0501.AR0516	9872828063	8409016172	3544615068	3019066598	136232
AR0501.AR0517	1022372265	882463496	3670595816	31682851	52768
AR0501.AR0518	9617826493	8895539333	3453062536	3193741708	149337
AR0501.AR0519	9927731803	8293774755	3564327011	297769178	148056
AR0501.AR0520	1028759768	1022541776	3693528694	3671204404	40950
AR0501.AR0521	9497562777	9021801821	3409884576	3239073392	108816
AR0501.AR0522	9327476319	1021615777	334881889	3667879814	99017
AR0501.AR0523	1002733496	8309590597	3600087268	29833701	142091
AR0501.AR0524	1017553499	3485716716	3653295129	1251467555	2094
AR0501.AR0526	988791698	9066166118	3550032402	3255001387	131165
AR0501.AR0527	9812692885	8680665713	3523024896	3116596207	99653
AR0501.AR0528	969511922	9203084712	3480812737	3304158903	93708
AR0503.AR0504	9848885695	1217091093	3536019104	4369689617	22613
AR0503.AR0505	8814658468	1409802462	3164703267	5061576093	22495
AR0503.AR0506	9891218985	1487408404	3551217912	5340202633	12193
AR0503.AR0507	8445539244	1777868487	3032179379	6383033706	10659
AR0503.AR0508	9736333831	1543673722	3495609909	5542210502	12756
AR0503.AR0509	9616559182	131460606	3452607537	4719794997	18389
AR0503.AR0510	860502401	1425211114	3089438768	5116897366	20651
AR0503.AR0511	8640968615	1589534869	3102343864	570686455	13738
AR0503.AR0512	9880675604	1262072195	354743255	4531184064	22980
AR0503.AR0514	9686692423	1605620251	3477787287	5764615466	12853
AR0503.AR0515	7522678047	1251461276	270084699	4493087965	19953
AR0503.AR0516	7448032987	1312913608	2674047374	4713718633	19420
AR0503.AR0517	1029991662	187696317	3697951533	6738810695	7469
AR0503.AR0518	9842544192	1204437946	3533742331	4324261363	21190
AR0503.AR0519	9767526348	1358397761	3506808875	4877019169	21002
AR0503.AR0520	104413116	2088975121	3748716193	7499991538	5842
AR0503.AR0521	9819539662	1405885408	3525483076	5047512799	15422
AR0503.AR0522	9613394753	1398127064	345147142	5019658224	14136
AR0503.AR0523	9912504449	1323870115	3558859975	4753055487	20175
AR0503.AR0524	8448753357	7867962322	3033333333	2824813481	300
AR0503.AR0526	9878233142	137077666	354655564	4921462799	18494
AR0503.AR0527	9620852008	1516849322	3454148779	5445903575	14209
AR0503.AR0528	9760660696	1505745867	3504343919	5406039137	13352
AR0504.AR0505	9963199181	8113574307	3577060769	2912994895	573742
AR0504.AR0506	1007546111	7710477994	3617365869	2768272303	305634
AR0504.AR0507	9651686328	9283050077	3465219143	3332868655	268136
AR0504.AR0508	1017636218	7535378064	365359211	2705406644	321719
AR0504.AR0509	9900683833	7850104262	3554616051	2818401949	465257
AR0504.AR0510	1012732654	7568491266	3635986977	2717295188	526157
AR0504.AR0511	9757148311	8593361795	3503082876	3085251714	352755
AR0504.AR0512	9990543542	7875235768	3586878142	2827424847	587996
AR0504.AR0514	1001805751	7849245433	3596756409	2818093606	322852
AR0504.AR0515	1006460189	7749689864	3613467112	2782350436	506508
AR0504.AR0516	9948563241	8240727816	3571806067	295864648	491964
AR0504.AR0517	1065798259	7662493333	3826506998	2751044499	187973
AR0504.AR0518	9927878652	7922644117	3564379734	2844445739	539704
AR0504.AR0519	1024855084	6922478986	3679509812	2485359126	535305
AR0504.AR0520	1054855198	773572082	3787218418	2777335168	147071
AR0504.AR0521	971955319	7973738328	3489585201	2862789957	390502
AR0504.AR0522	8254017354	9241992575	2963417787	331812789	355856
AR0504.AR0523	1012230353	7806470559	3634183579	2802736257	514165
AR0504.AR0524	1011940394	1892384485	3633142546	6794177432	7338
AR0504.AR0526	1010870234	85555163	3629300378	3071664148	473127
AR0504.AR0527	9810708055	7930486993	3522312288	2847261546	356530
AR0504.AR0528	9803527542	8363118727	3519734288	3002588161	334798
AR0505.AR0506	1010560108	7277504573	3628186943	2612823013	303857
AR0505.AR0507	7652290175	1084842862	2747381286	3894882328	266734
AR0505.AR0508	9979359113	8323026499	3582862627	2988193956	319909
AR0505.AR0509	986880415	80538561	3543170374	2891554427	461914
AR0505.AR0510	9616566754	8458960039	3452610256	3036997811	522286
AR0505.AR0511	7394965767	1003181348	2654994792	3601695176	350415
AR0505.AR0512	1008459875	7494017078	3620646532	2690556919	583730
AR0505.AR0514	1006022927	7336430967	3611897222	2633979199	320848
AR0505.AR0515	8783581026	8718390669	3153545616	3130140497	502945
AR0505.AR0516	9146968247	8422203549	3284011559	3023801227	488628
AR0505.AR0517	104425571	6622839499	374916336	2377780362	186759
AR0505.AR0518	9955740619	7498555254	3574382942	2692186248	535768
AR0505.AR0519	992110329	8040605808	3561947194	288679721	531493
AR0505.AR0520	1044462492	81051366	3749905766	2909965528	145913
AR0505.AR0521	9916263825	7749663142	3560209694	2782340842	388185
AR0505.AR0522	9744397529	8629060511	3498504997	3098068529	353511
AR0505.AR0523	994094944	738116621	3569072504	2650040374	510536
AR0505.AR0524	1005517771	1929506858	3610083573	6927456896	7299
AR0505.AR0526	1015118532	7905800566	364455293	2838398444	469904
AR0505.AR0527	9734980394	7472841828	3495123988	2682954426	354388
AR0505.AR0528	9999989956	7866577405	3590269663	2824316258	332897
AR0506.AR0507	9966955813	8564698976	3578409503	3074960979	143452
AR0506.AR0508	1007665035	7776995915	3617792841	2792154055	172901
AR0506.AR0509	9790483481	8054670941	3515051113	2891846977	247490
AR0506.AR0510	1017934681	6977958372	3654663675	2505277742	278986
AR0506.AR0511	9961762554	7728220756	3576544981	277464244	188190
AR0506.AR0512	9974609058	8335968374	3581157227	2992840442	310570
AR0506.AR0514	1006703101	8596419595	3614339234	3086349548	172701
AR0506.AR0515	9993130672	7867855118	3587806992	2824774991	268777
AR0506.AR0516	1000928076	7528528253	3593605314	2702947374	261342
AR0506.AR0517	1050881966	834322537	3772953433	2995445902	100693
AR0506.AR0518	1010447962	744912537	3627784307	267443957	285888
AR0506.AR0519	1003662245	7436282057	360342173	2669828469	283833
AR0506.AR0520	1038814736	8773783634	3729628777	3150028085	78174
AR0506.AR0521	9716239546	8284198854	3488395512	297425377	208540
AR0506.AR0522	9838174656	828735565	3532173549	2975387146	190840
AR0506.AR0523	996320718	8076742524	3577063641	2899771279	272528
AR0506.AR0524	99228631	2635899703	3562579014	9463600243	3955
AR0506.AR0526	1004244965	7878769628	3605513852	2828693599	251512
AR0506.AR0527	9805579041	7839932751	3520470832	2814750099	191321
AR0506.AR0528	9868517817	7830474889	3543067572	2811354468	179497
AR0507.AR0508	9788924275	863794325	3514491316	3101257675	151194
AR0507.AR0509	9804772424	8342182145	3520181234	2995071356	216736
AR0507.AR0510	9530911572	8525581728	3421857705	3060916818	244829
AR0507.AR0511	7169619842	1128034733	2574089447	4049952948	165037
AR0507.AR0512	9941520402	8648828094	3569277495	3105165632	272621
AR0507.AR0514	9844180201	7666732107	3534329703	2752566334	150948
AR0507.AR0515	8543871543	9399009714	3067483361	3374501333	235747
AR0507.AR0516	8846968149	868917861	3176303326	3119652569	229298
AR0507.AR0517	1026257603	8114658286	3684545238	2913384073	88057
AR0507.AR0518	9791294211	8871317071	3515342188	3185045254	251105
AR0507.AR0519	9707841804	8186045397	3485380493	2939013997	248914
AR0507.AR0520	1034544713	8379380231	371429823	3008426486	68484
AR0507.AR0521	9569711418	912701907	343578791	3276849259	183073
AR0507.AR0522	9594447334	913946282	344466878	3281316906	166913
AR0507.AR0523	9697817644	889373535	3481781546	3193094029	239455
AR0507.AR0524	9967709795	2819278195	3578680203	1012197914	3546
AR0507.AR0526	9960726621	8294145055	3576173053	2977824728	220557
AR0507.AR0527	9609752549	8544741913	345016377	3067795848	167308
AR0507.AR0528	9728921254	8928742485	3492948591	3205662547	156919
AR0508.AR0509	9803970296	8579329327	3519893248	3080213675	260792
AR0508.AR0510	9758007979	8015985222	3503391521	2877957747	293821
AR0508.AR0511	9873229444	8182373828	3544759175	2937695803	198194
AR0508.AR0512	1005324749	7448984286	3609390573	2674388916	327094
AR0508.AR0514	9355527319	8481500489	3358889965	3045090449	181688
AR0508.AR0515	9961926755	8739711791	3576603933	3137795362	283210
AR0508.AR0516	1001548596	7436073427	3595833152	2669753565	275124
AR0508.AR0517	1042788455	8032907292	3743895514	2884033232	105660
AR0508.AR0518	951789764	8802734943	3417185347	3160422396	301245
AR0508.AR0519	9302174245	8941054723	3339734754	3210082977	298892
AR0508.AR0520	1030095563	9789188425	3698324564	3514586153	82486
AR0508.AR0521	997743548	7914910084	358217199	284166901	219071
AR0508.AR0522	9919040953	7798308679	3561206759	2799805919	200272
AR0508.AR0523	9415448643	8672083269	3380403358	3113514875	287090
AR0508.AR0524	9286538191	2567101257	3334120983	9216595021	4232
AR0508.AR0526	9970801562	7505439802	3579790232	2694657989	264387
AR0508.AR0527	1001837942	7963722116	3596871982	2859193863	200894
AR0508.AR0528	9929780578	7838169853	3565062577	281411717	188726
AR0509.AR0510	9810595507	7801771837	352227188	2801049288	424459
AR0509.AR0511	9855856702	8271073281	3538521886	2969541331	285526
AR0509.AR0512	9859757748	7331945881	3539922468	2632368931	473355
AR0509.AR0514	9925626521	7605834901	3563571158	2730702573	260991
AR0509.AR0515	9799330636	8132878635	3518227484	2919925677	408504
AR0509.AR0516	9856772703	7470959074	3538850755	2682278466	396852
AR0509.AR0517	1040899478	7432688959	3737113571	2668538449	152195
AR0509.AR0518	9019541548	865791878	3238261892	3108429436	435462
AR0509.AR0519	9937652379	7479226384	3567888769	2685246656	431824
AR0509.AR0520	1030262778	9061701277	3698924912	3253398387	118967
AR0509.AR0521	9775937472	7261798843	3509828698	2607184227	315759
AR0509.AR0522	9834671053	7341793605	3530915659	2635904533	287880
AR0509.AR0523	9898494917	7931334957	355383017	2847565988	414851
AR0509.AR0524	9961863186	2077273428	3576581111	745797926	5961
AR0509.AR0526	1002585811	7212443701	3599557036	2589464382	381972
AR0509.AR0527	96801699	8812597188	3475445523	3163963211	288481
AR0509.AR0528	9802071954	7849100435	3519211692	2818041548	271163
AR0510.AR0511	9614545403	8316975053	3451884535	2986021321	321830
AR0510.AR0512	1004097452	7443019375	360498424	267224735	535528
AR0510.AR0514	9859842112	7162636231	3539952757	257158214	294648
AR0510.AR0515	9318692547	8444639322	3345665275	3031856282	461944
AR0510.AR0516	9243907633	8288835354	3318815448	29759184	448642
AR0510.AR0517	104886482	6951941888	3765711325	2495937113	171771
AR0510.AR0518	9854800425	8081265758	3538142654	2901395243	492100
AR0510.AR0519	9745738278	7692399473	3498986363	276178162	487847
AR0510.AR0520	1038316449	8071966939	372783979	2898056713	134024
AR0510.AR0521	979610511	7543567588	3517069432	2708346906	356163
AR0510.AR0522	9880353949	759634878	3547317067	2727296797	324682
AR0510.AR0523	9965511182	7223646315	3577890841	2593486427	468765
AR0510.AR0524	942976179	2073391023	3385542169	7444040366	6640
AR0510.AR0526	1014845934	7354388927	3643574227	2640426597	431310
AR0510.AR0527	974537129	7327186154	3498854604	2630660059	325215
AR0510.AR0528	9861850357	8835367091	3540673772	3172138229	305504
AR0511.AR0512	9896351251	7843654956	3553060536	2816086472	358581
AR0511.AR0514	9852433335	8376317514	3537292804	3007326886	198242
AR0511.AR0515	8432797102	9285417481	3027604602	3333718617	310057
AR0511.AR0516	8824108664	8692982578	3168096146	3121018298	301042
AR0511.AR0517	1033227405	8072421111	3709568733	2898219773	115752
AR0511.AR0518	9890365437	7568636934	3550911465	2717347487	330073
AR0511.AR0519	9845869754	8002674521	3534936299	2873178841	327310
AR0511.AR0520	1035037384	8773847816	3716067051	3150051128	90141
AR0511.AR0521	9640443788	8517374389	3461182763	3057970159	240048
AR0511.AR0522	9519199434	8968399677	3417652727	3219900563	218969
AR0511.AR0523	9868940098	823721489	3543219183	2957385243	314409
AR0511.AR0524	1002881464	2346131573	3600618511	8423253474	4527
AR0511.AR0526	9896256704	8324084953	3553026591	2988573969	289798
AR0511.AR0527	9647755789	8616378182	3463807971	3093515226	219634
AR0511.AR0528	9832819514	7980776286	3530250906	2865316777	206093
AR0512.AR0514	9965426404	793519978	3577860403	2848953565	328389
AR0512.AR0515	9934161095	7652228801	3566635303	2747359251	515455
AR0512.AR0516	100223151	7260524319	3598285	2606726638	500758
AR0512.AR0517	1042273208	6898064841	3742045639	2476593781	190933
AR0512.AR0518	9622805877	8742171778	3454850271	3138678565	549361
AR0512.AR0519	1015861613	7185973251	3647220794	2579960767	544760
AR0512.AR0520	1036846672	8160555673	372256289	2929862489	149706
AR0512.AR0521	9906667581	745711308	355676438	2677307375	397080
AR0512.AR0522	9756369186	7739528436	3502803149	2778702206	361736
AR0512.AR0523	1015099625	7770845251	364448505	2789945798	523196
AR0512.AR0524	1012973389	1984499895	3636851281	7124896926	7457
AR0512.AR0526	9991270888	7583418225	3587139279	2722654374	481155
AR0512.AR0527	989649892	875596155	3553113553	314362947	362271
AR0512.AR0528	9977274275	8085025054	3582114113	2902744933	340313
AR0514.AR0515	9813892692	912391201	352345566	327573374	283940
AR0514.AR0516	9799464863	7795949719	3518275675	2798958988	276050
AR0514.AR0517	1030327348	7827302967	3699156734	2810215661	106135
AR0514.AR0518	9778137527	851379221	3510618579	3056684059	302112
AR0514.AR0519	9326191931	8763397417	3348357759	3146299149	299956
AR0514.AR0520	1024701169	954724266	3678957214	3427721012	82855
AR0514.AR0521	9912368296	7575082264	3558811092	2719661536	219933
AR0514.AR0522	9922317425	8448025247	3562383102	3033071922	200495
AR0514.AR0523	9098823071	9348595798	3266726125	335640136	288157
AR0514.AR0524	8501380953	2456782858	3052228079	8820521824	4174
AR0514.AR0526	9928756924	7306245216	3564695058	262314169	265198
AR0514.AR0527	985450218	8364920194	3538035576	3003234937	200812
AR0514.AR0528	1007619573	805008586	3617629617	2890200808	188864
AR0515.AR0516	7488134911	9159536888	2688445061	3288524044	432049
AR0515.AR0517	1047748309	6941700372	3761702746	2492260129	165239
AR0515.AR0518	9807449055	7758560469	3521142218	2785535226	473815
AR0515.AR0519	9766845767	7825188057	3506564528	2809456351	469950
AR0515.AR0520	1034335388	7978790479	3713546693	2864603818	129515
AR0515.AR0521	9705253756	7882853992	3484451313	2830159997	342955
AR0515.AR0522	97710262	7611976087	3508065418	2732907427	313127
AR0515.AR0523	9702451357	7841761032	3483445175	2815406501	451530
AR0515.AR0524	9804336014	1980345018	3520024551	7109979781	6517
AR0515.AR0526	9900356386	7473108624	3554498489	2683050213	415195
AR0515.AR0527	981598107	8192167761	3524205445	2941212093	313194
AR0515.AR0528	9847069185	7875148329	3535366927	2827393454	294159
AR0516.AR0517	1040047167	6785761586	3734053543	2436273843	160694
AR0516.AR0518	98501434	7638121398	3536470655	2742294308	460329
AR0516.AR0519	9808645061	7116104248	3521571617	2554875886	456549
AR0516.AR0520	1032805346	7982124256	3708053425	2865800735	125934
AR0516.AR0521	9735151771	8129568464	3495185517	2918737234	333473
AR0516.AR0522	9688545527	7819340768	3478452602	2807357014	303865
AR0516.AR0523	9804725245	7940222416	3520164296	2850756829	438721
AR0516.AR0524	9690136396	2063103386	3479023768	7407104936	6269
AR0516.AR0526	9934477757	8039558685	3566748993	2886421264	403272
AR0516.AR0527	9621725694	7540252847	3454462456	2707156824	304496
AR0516.AR0528	986641994	7965900478	3542314377	2859975955	285943
AR0517.AR0518	1043060529	754396314	3744872334	270848892	176006
AR0517.AR0519	1033126928	7097913459	3709207993	2548344896	174544
AR0517.AR0520	1036055527	1001896587	3719722465	3597082535	48138
AR0517.AR0521	1039390535	775574424	3731696055	2784524123	127773
AR0517.AR0522	1039947691	7680272632	3733696394	2757427753	117152
AR0517.AR0523	10316897	8129043126	3704047951	2918548624	167838
AR0517.AR0524	989561174	3298287625	3552795031	118417539	2415
AR0517.AR0526	1037710091	8064643156	37256628	2895427275	154496
AR0517.AR0527	1041909843	7247696733	3740741056	2602121184	117319
AR0517.AR0528	1041548945	8236513155	3739445334	2957133301	109904
AR0518.AR0519	9766749123	7366686518	350652983	2644841769	500549
AR0518.AR0520	1033491142	82252139	371051562	295307656	137776
AR0518.AR0521	9793080073	7335301341	3515983361	2633573633	365161
AR0518.AR0522	9796092809	8177614787	3517065015	2935987177	333167
AR0518.AR0523	9623604295	8704581965	3455136925	3125182795	480774
AR0518.AR0524	9778929646	1983049152	3510902971	7119688361	6833
AR0518.AR0526	1005499557	7905394124	361001818	2838252521	442236
AR0518.AR0527	9799584541	7903432515	3518318642	2837548249	333540
AR0518.AR0528	9825001436	8765089383	3527444002	3146906611	313584
AR0519.AR0520	1041710905	8642077101	3740026815	3102741841	136491
AR0519.AR0521	1000215046	6980676107	3591045344	2506253483	362627
AR0519.AR0522	1004557734	7375731784	3606636778	2648089266	330341
AR0519.AR0523	8426106051	8106640711	3025202332	2910505545	476940
AR0519.AR0524	842571599	1960676149	3025062289	7039363167	6823
AR0519.AR0526	1007018551	7586251804	3615471785	2723671706	438579
AR0519.AR0527	9897252144	7581511244	3553383981	2721969716	331045
AR0519.AR0528	1007272058	7541419643	3616381945	2707575735	310830
AR0520.AR0521	1033531242	7759188763	3710659592	2785760801	99516
AR0520.AR0522	1026859222	9468139657	3686705215	3399320872	91141
AR0520.AR0523	1036111975	849466499	3719925127	3049816864	131422
AR0520.AR0524	1027739858	3813625968	368986694	1369195937	1954
AR0520.AR0526	1021550322	8494872295	3667644816	3049891292	120636
AR0520.AR0527	1028106543	8822397489	369118344	3167481788	90727
AR0520.AR0528	1019286729	9233001234	3659517895	3314899752	85749
AR0521.AR0522	9344848135	8819427282	3355055846	3166415402	242452
AR0521.AR0523	9968648294	7522301317	357901715	2700711734	348456
AR0521.AR0524	1003421942	2409016013	3602558976	8649025797	5002
AR0521.AR0526	9893481662	7578911448	3552030275	2721036318	320794
AR0521.AR0527	987605631	7687845213	3545774097	2760146516	242954
AR0521.AR0528	9637164561	8031118969	3460005431	2883391175	228306
AR0522.AR0523	9990982004	713608653	3587035562	2562050071	317669
AR0522.AR0524	9869374247	2487508434	3543375054	8930835037	4634
AR0522.AR0526	9948879138	7971158895	3571919483	286186387	292459
AR0522.AR0527	9603254293	8295736242	3447830718	2978396008	221548
AR0522.AR0528	951715967	8971519143	3416920396	3221020536	208884
AR0523.AR0524	8249438074	2023109862	29617737	7263517258	6540
AR0523.AR0526	1019300433	7714718134	3659567099	2769794629	421528
AR0523.AR0527	966046718	8061986783	3468371708	2894473564	317959
AR0523.AR0528	1002096217	8099167168	3597799261	2907822338	298627
AR0524.AR0526	9987980682	2037460135	3585958005	7315038658	6096
AR0524.AR0527	9661332844	2429865244	3468682505	8723880232	4630
AR0524.AR0528	9712820393	2453515065	3487167942	8808789552	4442
AR0526.AR0527	1006811648	725655519	3614728946	2605301612	293300
AR0526.AR0528	1005949234	8029671588	3611632645	2882871526	275363
AR0527.AR0528	9709353505	9160124545	3485923235	328873503	209210

## Sheet: D. READv2 on SG
PairIndividuals	Norm2AlleleDiff	StError_2Allele_Norm	Nonnormalized_P0	Nonnormalized_P0_serr	OverlapNSNPs
AR0149.AR0151	1004790349	8405789098	3687229015	3084630489	217955
AR0149.AR0152	1048058899	8612199175	3846009456	3160375765	85239
AR0149.AR0161	1031095684	7249904121	3783760392	2660461146	196421
AR0149.AR0162	1036706725	7064617811	3804350949	2592467553	382859
AR0149.AR0180	1019697884	9960644226	3741934453	3655207918	62612
AR0149.AR0195	103089692	1503027687	3783030996	5515585719	14002
AR0149.AR0500and513	1035234171	6696630365	3798947191	2457429036	272794
AR0149.AR0501	1025141173	7574526059	376190942	2779586039	153345
AR0149.AR0503	1033218504	1276942104	3791550399	4685930731	20427
AR0149.AR0504	1052969115	6379480522	3864028227	234104614	587519
AR0149.AR0505	1044570276	6834970696	3833207428	2508195097	578479
AR0149.AR0506	1028248547	6007378272	3773312395	2204497634	293567
AR0149.AR0507	1034447712	7389145505	379606116	2711557862	263834
AR0149.AR0508	1035480045	6932274758	3799849463	2543902283	314873
AR0149.AR0509	1030006555	6596719945	3779763668	2420765407	472556
AR0149.AR0510	1046474824	6705582246	3840196452	2460714063	542829
AR0149.AR0511	1034746726	7340326469	3797158436	2693642984	352482
AR0149.AR0512	1042360695	6316160177	3825099038	2317809789	609362
AR0149.AR0514	104154283	7189397484	3822097761	2638257327	317815
AR0149.AR0515	1039575872	6447385989	3814879713	236596507	516475
AR0149.AR0516	103333184	6137353993	3791966301	2252194176	501861
AR0149.AR0517	1038105578	705501279	3809484248	2588942846	180552
AR0149.AR0518	1033909151	6872621809	3794084828	2522011738	558327
AR0149.AR0519	1035762399	5878114002	3800885601	215706217	548780
AR0149.AR0520	1041616883	7301068022	3822369511	2679236507	150875
AR0149.AR0521	1040903914	6538941096	3819753164	2399562591	381954
AR0149.AR0522	1046051317	6553885422	3838642331	2405046636	345828
AR0149.AR0523	1041129746	6341106259	3820581887	2326964128	519379
AR0149.AR0524	9974929109	200849161	366044997	7370461459	6756
AR0149.AR0526	1036929391	6515446331	3805168053	2390940835	472828
AR0149.AR0527	1030565847	7403777133	3781816074	2716927157	345030
AR0149.AR0528	102896274	6699171324	3775933231	2458361479	328295
AR0151.AR0152	102643978	8852689876	3766674854	3248627438	142505
AR0151.AR0161	1038727603	6489075927	3811766862	2381263819	327360
AR0151.AR0162	1032155321	6848149857	3787648889	2513031388	632688
AR0151.AR0180	1030048558	8396370621	3779917805	3081174237	106333
AR0151.AR0195	1028195437	1276824677	3773117499	4685499817	23413
AR0151.AR0500and513	1031736477	6231468895	3786111877	2286731052	449852
AR0151.AR0501	102755461	6763296628	3770765888	2481893222	253601
AR0151.AR0503	1018668097	1063906985	3738155494	3904166384	33982
AR0151.AR0504	1042907233	6040920272	3827104644	2216806374	972623
AR0151.AR0505	1041978315	6441259423	382369584	2363716835	956075
AR0151.AR0506	1036984746	6855525839	3805371186	2515738115	482426
AR0151.AR0507	1033168439	6487183454	3791366675	2380569348	435012
AR0151.AR0508	1033560835	7286952845	3792806633	2674056731	518144
AR0151.AR0509	103652544	6289598265	3803685694	2308062497	781074
AR0151.AR0510	1036073426	6443721503	3802026962	2364620332	898981
AR0151.AR0511	1032290254	7137478183	3788144046	261920476	581480
AR0151.AR0512	1040373912	6301241066	3817808242	2312334997	1009409
AR0151.AR0514	1028300494	7057561958	3773503021	2589878302	525358
AR0151.AR0515	1029825881	6316098539	3779100657	231778717	856381
AR0151.AR0516	1030919749	6420490022	3783114772	2356095192	831804
AR0151.AR0517	1039494348	7155535269	3814580547	2625831079	298329
AR0151.AR0518	1045097697	656788839	3835142878	2410185235	925371
AR0151.AR0519	1038588876	6662457348	3811257782	2444888734	908456
AR0151.AR0520	1045276416	7229149851	3835798716	2652845055	251009
AR0151.AR0521	1036676051	6130015761	3804238384	2249501301	629674
AR0151.AR0522	1028927403	7041607248	3775803556	2584023482	570464
AR0151.AR0523	1028150296	6541847246	3772951846	2400629047	862240
AR0151.AR0524	1005030386	1619359631	3688109866	5942483249	11068
AR0151.AR0526	1026344496	6183497849	3766325193	2269127357	782686
AR0151.AR0527	103093969	6553235122	3783187948	2404807999	566998
AR0151.AR0528	1036827282	6275911991	380479335	2303040113	541375
AR0152.AR0161	1019242736	826937846	3740264218	3034572558	127622
AR0152.AR0162	1023567901	7275761385	3756136063	2669949857	248327
AR0152.AR0180	1023945063	1091999026	3757520114	4007254345	41389
AR0152.AR0195	1028445693	1703967632	377403585	6252965008	9205
AR0152.AR0500and513	1014158664	831941157	3721607455	3052932958	176851
AR0152.AR0501	101161096	8607841231	3712258272	3158776552	99492
AR0152.AR0503	1026398879	1386999996	3766524759	5089804688	13389
AR0152.AR0504	1033726299	68980952	3793413826	2531359581	381071
AR0152.AR0505	1039994758	7501207328	381641688	275268063	375187
AR0152.AR0506	1029537003	7279624732	3778040578	267136757	189413
AR0152.AR0507	1024483516	7962049546	3759496049	29217936	170334
AR0152.AR0508	103132855	7138002844	3784614929	2619397293	202586
AR0152.AR0509	1013106826	6717133159	3717747576	2464952844	305946
AR0152.AR0510	1022011775	7529928958	3750425624	2763220463	352424
AR0152.AR0511	1034223422	7365805715	3795238095	2702992975	228900
AR0152.AR0512	1039822609	7509896424	3815785152	2755869224	395777
AR0152.AR0514	1033489593	7476918682	3792545199	2743767547	206310
AR0152.AR0515	1034586203	7142810559	3796569372	2621161555	335682
AR0152.AR0516	1024110975	7687927051	3758128953	2821200235	326149
AR0152.AR0517	1039565742	8206887493	381484254	3011640559	117554
AR0152.AR0518	102704135	8064724279	3768882404	2959471634	363235
AR0152.AR0519	103301384	705222279	3790799353	2587919014	355888
AR0152.AR0520	1026697427	8726204768	3767620327	3202211829	98253
AR0152.AR0521	1015893933	7492491662	3727975283	2749482285	247279
AR0152.AR0522	1011274615	7457592225	3711024002	2736675413	223984
AR0152.AR0523	102462859	7066857824	376002842	2593289559	337790
AR0152.AR0524	1005254108	2494143867	3688930847	9152635318	4237
AR0152.AR0526	1033246785	7459464888	3791654177	2737362615	306932
AR0152.AR0527	1014197825	8026407322	3721751159	2945410652	222664
AR0152.AR0528	1025624276	7741357105	3763682237	2840807195	212045
AR0161.AR0162	7532119752	5851264952	2764024408	2147209508	583251
AR0161.AR0180	1015974676	8123655412	3728271582	2981097298	95382
AR0161.AR0195	1008583442	1335461849	3701148339	4900677721	21161
AR0161.AR0500and513	1023879093	6904037913	3757278025	2533540349	415463
AR0161.AR0501	1015474958	7023548231	372643779	2577396454	234857
AR0161.AR0503	1015464316	1146988764	3726398739	4209047443	31725
AR0161.AR0504	1030938428	6526450154	3783183316	2394978853	893898
AR0161.AR0505	1025313445	6369001448	3762541597	2337200687	881965
AR0161.AR0506	1015537902	6427372408	3726668776	2358620787	448862
AR0161.AR0507	1013203842	7268560183	3718103592	2667307268	403141
AR0161.AR0508	1016146249	6907198154	3728901194	2534700047	479648
AR0161.AR0509	1025548695	6809296695	3763404882	2498773637	717276
AR0161.AR0510	1037803808	6460147563	3808376859	2370648122	822886
AR0161.AR0511	1005281568	7088400434	3689031615	2601194943	535913
AR0161.AR0512	1028695937	676873683	3774954158	2483889585	926549
AR0161.AR0514	1012036103	6318762702	3713818398	2318764824	484224
AR0161.AR0515	1009922415	686354859	3706061903	2518682184	784968
AR0161.AR0516	1020949829	5994894126	3746528651	2199916389	763392
AR0161.AR0517	1034169221	6940268426	3795039198	254683568	275399
AR0161.AR0518	1015051414	7234710737	3724883534	2654885705	848746
AR0161.AR0519	1034368856	6277942495	3795771788	2303785237	834821
AR0161.AR0520	1019205288	7326361376	3740126797	2688518283	228396
AR0161.AR0521	1012003263	6709784932	3713697886	2462256302	583747
AR0161.AR0522	1010539476	7016523684	37083263	2574818691	527281
AR0161.AR0523	1017201032	6713278329	373277188	2463538256	790568
AR0161.AR0524	100343163	1636342868	3682242991	6004805784	10165
AR0161.AR0526	1014650921	6732223692	3723413865	2470490541	719595
AR0161.AR0527	1017894835	6550846215	3735317893	2403931354	527002
AR0161.AR0528	102504393	6824332062	376155257	250429109	501620
AR0162.AR0180	1016612411	8103365544	3730611846	2973651626	184262
AR0162.AR0195	101097211	1084439847	3709913915	3979514803	42284
AR0162.AR0500and513	1016004314	6563997444	3728380345	2408757394	855645
AR0162.AR0501	1004230669	6672682297	3685175185	2448640933	488856
AR0162.AR0503	1007861502	9454115068	3698499073	346932944	66892
AR0162.AR0504	1026751042	6377688286	3767817073	2340388452	1832512
AR0162.AR0505	1014789245	6919911047	3723921464	2539365234	1813129
AR0162.AR0506	1007526521	6513786475	369726981	2390331726	938030
AR0162.AR0507	1007370072	7084719719	3696695696	259984425	834548
AR0162.AR0508	1009543454	6956596244	3704671246	2552827417	996415
AR0162.AR0509	1020125779	6262374549	3743504677	2298072345	1469134
AR0162.AR0510	1031333034	6289279008	3784631382	2307945341	1677236
AR0162.AR0511	1001330617	7340332527	367453301	2693645207	1105003
AR0162.AR0512	1019745804	6492449513	3742110301	2382501807	1886954
AR0162.AR0514	1013601532	6412066678	3719562972	2353004119	1000303
AR0162.AR0515	1008825636	6638543321	3702037106	2436113123	1603844
AR0162.AR0516	1014594678	6395132024	3723207471	2346789694	1559110
AR0162.AR0517	1029907231	6215983568	3779399185	2281048479	571657
AR0162.AR0518	1015507101	6839796261	3726555743	2509965911	1725156
AR0162.AR0519	1023060864	6690176014	3754275412	2455060515	1702760
AR0162.AR0520	1036135511	6759279545	3802254792	2480419093	463546
AR0162.AR0521	1007295823	616177294	3696423227	2261155075	1209526
AR0162.AR0522	1011127676	6616817313	3710484789	2428140438	1096951
AR0162.AR0523	1016033747	6651738632	3728488351	244095534	1619820
AR0162.AR0524	9788545469	122828018	3592053696	4507358496	22199
AR0162.AR0526	1022641551	6564980753	3752736682	2409118234	1484005
AR0162.AR0527	1007579608	6546721823	3697464619	2402417846	1099164
AR0162.AR0528	1014360203	656780057	3722347032	2410153009	1042474
AR0180.AR0195	100739772	1915090329	3696797153	7027711437	7025
AR0180.AR0500and513	1013008608	8079034049	371738715	2964722819	130815
AR0180.AR0501	1005989048	898503865	3691627819	3297194807	74222
AR0180.AR0503	1009903861	1613368382	3705993817	5920497461	10027
AR0180.AR0504	1023710348	7425647088	3756658793	2724952665	281958
AR0180.AR0505	1026964988	762662141	3768602182	279870321	277790
AR0180.AR0506	1013642343	7905422133	3719712737	290101332	140777
AR0180.AR0507	1012563042	829395036	3715752079	3043589585	127234
AR0180.AR0508	1020558957	7706593833	3745094289	2828050291	151609
AR0180.AR0509	1024650015	7509444455	376010704	2755703367	225709
AR0180.AR0510	1020258238	7992912028	3743990755	2933119051	259600
AR0180.AR0511	1018563967	8400413045	3737773375	3082657666	168587
AR0180.AR0512	1023192494	7871356204	3754758449	2888512316	292112
AR0180.AR0514	1014017641	7737030459	3721089948	2839219468	152888
AR0180.AR0515	1020477439	7104446776	3744795148	2607083389	248326
AR0180.AR0516	1023625403	7690808205	3756347074	2822257518	240859
AR0180.AR0517	1033407753	8717031428	3792244875	3198845534	87555
AR0180.AR0518	1029250935	7636993241	3776990806	2802509309	267128
AR0180.AR0519	1027706468	7300055531	3771323155	2678864959	263446
AR0180.AR0520	1013492257	9529134632	3719161971	3496858995	73124
AR0180.AR0521	102020472	7838402917	3743794365	2876419613	183704
AR0180.AR0522	1013420465	8032039699	3718898523	2947477537	166431
AR0180.AR0523	1017168255	7417444521	37326516	272194261	249951
AR0180.AR0524	9986430718	274970236	3664670659	1009044557	3340
AR0180.AR0526	102140021	7655885339	3748181393	2809442048	226822
AR0180.AR0527	102599564	8074148273	3765045015	296292991	166168
AR0180.AR0528	1018964176	778916259	3739242002	2858350136	157441
AR0195.AR0500and513	9847761531	1212257791	3613783919	4448561935	30035
AR0195.AR0501	9794178198	13230006	3594120711	4854949298	17281
AR0195.AR0503	7569598448	3119398391	2777777778	1144710065	2322
AR0195.AR0504	9988374494	106452778	3665383956	3906444487	64187
AR0195.AR0505	7498962071	9154813431	2751856699	3359496212	63419
AR0195.AR0506	9995432335	1105958808	3667973937	4058481862	32383
AR0195.AR0507	7372392606	1069901959	2705410134	3926165841	29149
AR0195.AR0508	9949597348	1201709955	36511541	440985507	34789
AR0195.AR0509	9798812621	1062172948	3595821382	3897803075	51596
AR0195.AR0510	9321366253	110712639	342061527	406276648	58966
AR0195.AR0511	7543569159	1081758244	276822594	3969674258	38736
AR0195.AR0512	9981491366	101793301	3662858089	3735457982	66429
AR0195.AR0514	9953956716	1127729405	3652753836	4138372335	35387
AR0195.AR0515	7231618288	1163752171	2653750885	4270563284	56520
AR0195.AR0516	7985390377	1178635304	2930358868	4325179172	54867
AR0195.AR0517	1042620508	1206725752	3826052462	4428261289	20167
AR0195.AR0518	9952376394	1045836632	3652173913	3837854513	60835
AR0195.AR0519	9890639339	9433889702	3629518574	3461907439	60030
AR0195.AR0520	1046396379	1345528707	3839908588	4937619567	16628
AR0195.AR0521	9678148786	1098990824	3551541976	4032911799	42024
AR0195.AR0522	9715757751	1054853854	356534315	3870944563	38030
AR0195.AR0523	9875635358	1019662366	3624012638	3741804114	56970
AR0195.AR0524	9820346071	5515083809	3603723404	2023842791	752
AR0195.AR0526	1005469544	1068664072	3689721422	3921623231	52050
AR0195.AR0527	9647528997	1092701165	3540305585	4009830952	37960
AR0195.AR0528	9753470144	1146255242	3579182279	4206355674	36296
AR0500and513.AR0501	9713257346	7798488156	3564425589	2861772292	347913
AR0500and513.AR0503	990815299	1021952178	3635945471	3750206922	47828
AR0500and513.AR0504	9738540862	7849014101	3573703755	2880313546	1295029
AR0500and513.AR0505	9976501936	6839800717	3661027143	2509967546	1280250
AR0500and513.AR0506	978114036	7219075605	358933628	2649148159	666034
AR0500and513.AR0507	9757416035	741885918	3580630283	2722461741	591893
AR0500and513.AR0508	9885301656	7195660599	3627559831	2640555671	707029
AR0500and513.AR0509	9886305124	7078049437	3627928069	259739649	1040831
AR0500and513.AR0510	9792569373	7435764802	3593530328	2728665513	1188561
AR0500and513.AR0511	9797335633	7491165058	3595279379	2748995468	783202
AR0500and513.AR0512	1001042817	7138258145	3673476883	2619490979	1334221
AR0500and513.AR0514	9903043549	7265448562	3634070485	2666165412	709623
AR0500and513.AR0515	9791451236	7154701172	3593120011	2625524994	1135932
AR0500and513.AR0516	9901007144	7279864696	3633323196	2671455628	1104804
AR0500and513.AR0517	1044785246	6844687122	3833996291	2511760685	405003
AR0500and513.AR0518	9938439851	7428279099	3647059689	2725918521	1222796
AR0500and513.AR0519	9900412917	6624962453	3633105135	243112942	1205239
AR0500and513.AR0520	1020297673	700836848	3744135467	2571826016	330589
AR0500and513.AR0521	9791573027	7370593767	3593164704	2704750023	856671
AR0500and513.AR0522	9644223646	7589252627	3539092637	2784990174	776668
AR0500and513.AR0523	9835125668	732064987	3609146999	268642236	1145556
AR0500and513.AR0524	9780192575	135126782	3588988476	4958680105	15620
AR0500and513.AR0526	9954327018	6870851876	3652889724	2521362235	1048370
AR0500and513.AR0527	9763901316	7244823902	3583010154	2658596883	778206
AR0500and513.AR0528	9402374384	7419095602	3450342419	2722548499	738860
AR0501.AR0503	9883057488	1155914711	36267363	4241802545	27573
AR0501.AR0504	9442044034	8428862248	3464899793	3093097528	737574
AR0501.AR0505	9768590759	7419231139	3584731016	2722598237	729243
AR0501.AR0506	9904380661	7749551417	3634561158	2843814221	382302
AR0501.AR0507	9725803358	8248527082	3569029537	3026920832	338529
AR0501.AR0508	994269351	7184110842	3648620633	2636317315	405186
AR0501.AR0509	9655056826	7160771006	3543068035	2627752411	594211
AR0501.AR0510	1001779219	7467314576	3676179222	2740243176	675318
AR0501.AR0511	9686684906	8597416333	3554674433	3154950979	448418
AR0501.AR0512	9352828311	8012183155	3432160744	294019088	758123
AR0501.AR0514	9972550175	6802701228	3659576985	2496353331	405801
AR0501.AR0515	9893271783	7102837684	3630484589	2606492909	647291
AR0501.AR0516	9842450497	6779908429	3611834955	2487989172	629356
AR0501.AR0517	102665342	6704172411	3767458835	2460196703	232905
AR0501.AR0518	9644451224	7685211895	353917615	2820203868	695806
AR0501.AR0519	9974375505	6703615061	3660246817	2459992175	686257
AR0501.AR0520	1017560768	7082478962	3734091986	2599021971	187877
AR0501.AR0521	9474235997	8201321944	3476713117	3009598198	489911
AR0501.AR0522	937963502	825133656	3441997869	3027951812	444794
AR0501.AR0523	1000678272	7211273435	367213913	2646285036	653088
AR0501.AR0524	1005496935	1740382611	3689821939	6386595241	9098
AR0501.AR0526	991028161	7399478759	36367266	2715349804	598607
AR0501.AR0527	97857988	667907263	3591045765	2450985961	446984
AR0501.AR0528	9662638794	7537031484	3545850352	2765826842	423072
AR0503.AR0504	9852008955	8466979397	3615342575	3107085188	100635
AR0503.AR0505	8542445598	8941508783	3134778643	3281220869	99771
AR0503.AR0506	9989622702	102709606	3665842005	3769083168	52951
AR0503.AR0507	8478067824	1127956793	3111154253	4139206769	46359
AR0503.AR0508	9683179148	1005669813	3553387943	3690456339	55668
AR0503.AR0509	970218679	1015939765	3560363082	3728143472	80753
AR0503.AR0510	8580171836	9739554493	3148622852	3574075722	91675
AR0503.AR0511	8566971406	1084600702	3143778757	3980105087	61073
AR0503.AR0512	9922796519	8429603863	3641319134	3093369674	102916
AR0503.AR0514	9772166207	1005049191	358604308	3688178874	55571
AR0503.AR0515	7472501301	8156271549	2742146522	2993066279	87891
AR0503.AR0516	7462179235	7996109133	2738358685	2934292276	85858
AR0503.AR0517	1034998239	1033303434	3798081401	3791862062	32211
AR0503.AR0518	986126873	9232890777	3618740588	3388147866	94298
AR0503.AR0519	9588271563	888031588	351856018	3258765215	93345
AR0503.AR0520	1017089953	1174671286	3732364258	4310632615	25729
AR0503.AR0521	9824635787	8432668125	360529758	3094494151	67276
AR0503.AR0522	9707481509	8639466226	3562306059	3170381819	61230
AR0503.AR0523	9724926203	8937895175	3568707651	3279894802	88993
AR0503.AR0524	8557338733	4380353131	3140243902	1607436335	1312
AR0503.AR0526	9853075903	9400274281	3615734107	3449571755	81657
AR0503.AR0527	9488113716	1043972132	3481805754	3831012448	61448
AR0503.AR0528	9733580116	9701434789	3571883335	3560087124	58115
AR0504.AR0505	9803474095	7751546759	3597531979	2844546442	2765293
AR0504.AR0506	1002212513	6936118776	3677769259	2545312903	1415135
AR0504.AR0507	9649710739	8180186738	3541106208	3001842317	1261987
AR0504.AR0508	1008316246	7191513617	3700167822	2639033874	1506356
AR0504.AR0509	9851692428	7294823981	361522642	2676945163	2231910
AR0504.AR0510	1011069711	7222214036	3710272075	2650299853	2555287
AR0504.AR0511	9710536483	8426825477	3563427128	3092350104	1673448
AR0504.AR0512	9875413718	7574446945	3623931304	2779557007	2884707
AR0504.AR0514	9941265592	7294096687	3648096637	2676678271	1514609
AR0504.AR0515	9957542286	7484461622	3654069615	2746535542	2440624
AR0504.AR0516	9892865945	761067843	3630335661	2792852694	2372574
AR0504.AR0517	1053507773	6193063076	3866004917	227263746	861957
AR0504.AR0518	9882508596	7612880825	3626534876	2793660896	2631239
AR0504.AR0519	1016748566	6706120322	3731111488	2460911518	2593640
AR0504.AR0520	1048757776	6193753657	384857409	2272890879	705269
AR0504.AR0521	9627800446	7518918302	3533065897	2759179938	1830965
AR0504.AR0522	8138451566	852025846	2986526969	312663674	1658053
AR0504.AR0523	1002366619	7080250921	3678334774	2598204357	2462753
AR0504.AR0524	1001758997	1133607506	3676105014	4159942908	32986
AR0504.AR0526	1006541965	778168006	3693656833	2855604309	2251005
AR0504.AR0527	9760257607	756979088	358167304	2777848394	1660199
AR0504.AR0528	9743911191	7597991179	3575674478	2788196917	1574626
AR0505.AR0506	1004233477	667474977	3685185489	2449399623	1401943
AR0505.AR0507	7563492337	9421158578	2775537049	3457235561	1251329
AR0505.AR0508	9888570892	7763149991	3628759526	2848804422	1491777
AR0505.AR0509	9829919653	7498806043	3607236574	2751799442	2205353
AR0505.AR0510	953371269	7895173983	3498538982	2897252608	2524268
AR0505.AR0511	7297435359	9837872268	2677903447	3610154905	1656109
AR0505.AR0512	9990236666	7089499885	3666067308	2601598404	2850826
AR0505.AR0514	1001625945	710603656	3675616758	2607666785	1496372
AR0505.AR0515	8665596556	8301695131	3179970736	3046431645	2410453
AR0505.AR0516	9051521526	814869245	3321591697	2990285015	2343512
AR0505.AR0517	1037328793	6481844771	380663372	2378610238	851679
AR0505.AR0518	9940360366	7507247836	3647764451	2754897285	2598937
AR0505.AR0519	9885377169	7439309101	3627587542	2729966146	2562229
AR0505.AR0520	1034714068	6564101562	3797038594	2408795602	695413
AR0505.AR0521	9833982419	7230399862	3608727467	2653303765	1812118
AR0505.AR0522	9596920001	7765371995	3521733854	284961982	1639769
AR0505.AR0523	989089076	7338995934	3629610837	2693154724	2431988
AR0505.AR0524	1001049245	1135074106	3673500472	4165324818	32827
AR0505.AR0526	1006671636	7059869607	3694132682	2590725128	2225429
AR0505.AR0527	9667927717	7050712585	3547791201	2587364822	1645125
AR0505.AR0528	9901842139	6972916064	363362961	255881622	1559804
AR0506.AR0507	9992279939	689596994	3666817118	2530579685	649157
AR0506.AR0508	100235996	6613578591	3678310338	2426951941	776960
AR0506.AR0509	9840807405	7176748352	3611231998	2633615538	1137429
AR0506.AR0510	1020935956	6323628625	3746477742	2320550448	1294979
AR0506.AR0511	100349764	711575913	3682485225	2611234628	857516
AR0506.AR0512	9962412207	6837572425	3655856705	250914984	1455016
AR0506.AR0514	9987097483	6734413913	3664915338	2471294276	777505
AR0506.AR0515	1003182674	6446504758	3681329409	236564169	1239468
AR0506.AR0516	1000863874	6758247164	3672820224	2480040245	1205319
AR0506.AR0517	1039835501	6102617238	381583246	2239447002	443835
AR0506.AR0518	1011920686	7099691191	3713394858	2605338256	1332907
AR0506.AR0519	1005150293	673608208	3688549883	2471906435	1315742
AR0506.AR0520	103951303	6827917903	3814649104	2505606969	358725
AR0506.AR0521	9731284013	6960252528	3571040745	2554169146	941143
AR0506.AR0522	9841789493	717034524	361159239	263126582	853629
AR0506.AR0523	9942281855	7060255831	364846957	2590866859	1251152
AR0506.AR0524	9983931273	134168276	366375345	4923506288	17392
AR0506.AR0526	1006073514	6706026932	3691937781	2460877247	1147885
AR0506.AR0527	9835024175	700924577	3609109755	2572147951	856225
AR0506.AR0528	9878726956	7184763596	3625147146	2636556852	812116
AR0507.AR0508	9791750749	7647747665	3593229922	2806455806	689800
AR0507.AR0509	9832030319	7596825821	3608011115	2787769271	1013442
AR0507.AR0510	955010723	8029799334	3504555205	2946655401	1156589
AR0507.AR0511	7154919888	1043639923	2625605256	3829793359	764140
AR0507.AR0512	9907955911	7357035471	363587315	2699774603	1299267
AR0507.AR0514	9810658361	7517921112	3600168354	2758814004	691401
AR0507.AR0515	8558533168	8575753163	3140682218	3147001354	1106508
AR0507.AR0516	8873001703	8067139887	3256081168	2960358078	1075698
AR0507.AR0517	1027947364	6301747687	3772207159	231252091	395368
AR0507.AR0518	9879600703	7581081698	3625467781	2781991729	1190194
AR0507.AR0519	9759891086	7494680862	358153854	2750285645	1174230
AR0507.AR0520	1030444517	6618997069	3781370837	2428940333	320680
AR0507.AR0521	9577246213	7656529094	3514514262	2809678283	837211
AR0507.AR0522	9596242999	7629377009	3521485418	2799714418	758305
AR0507.AR0523	9747132434	7668104631	3576856561	2813926101	1116567
AR0507.AR0524	9748998913	1385879784	3577541494	5085693902	15424
AR0507.AR0526	9966567264	7277457076	3657381466	2670572116	1022595
AR0507.AR0527	9690344935	7355908934	3556017536	2699361203	760494
AR0507.AR0528	9734725311	7555613922	3572303581	2772645946	719992
AR0508.AR0509	9786595007	7350427601	3591337945	2697349746	1210521
AR0508.AR0510	9758054761	7802905441	3580864673	2863393281	1380337
AR0508.AR0511	9860267142	7795967967	361837304	2860847471	912598
AR0508.AR0512	1002380508	714506749	367838574	262198977	1549639
AR0508.AR0514	9352478031	7909885154	3432032204	2902651093	825744
AR0508.AR0515	9918779188	713646438	3639844914	261883273	1319526
AR0508.AR0516	9960570323	67785461	3655180799	2487489244	1283113
AR0508.AR0517	1038366358	6364936378	3810441222	2335708948	471305
AR0508.AR0518	951660902	8443336869	3492262534	3098409207	1420297
AR0508.AR0519	9296385831	8101099741	3411448329	2972820156	1400414
AR0508.AR0520	1031844428	7123257325	378650802	2613986203	381560
AR0508.AR0521	9954070685	7201160135	3652795659	2642573808	997332
AR0508.AR0522	9885865966	7242619619	3627766913	2657787988	904573
AR0508.AR0523	9357943987	8104352611	3434038018	2974013845	1331517
AR0508.AR0524	9092957365	1373842654	33367972	5041521848	18284
AR0508.AR0526	9962009376	6832423503	365570888	2507260366	1220502
AR0508.AR0527	1001112845	652396606	3673733862	2394067277	908234
AR0508.AR0528	9932522225	7182859199	3644888128	2635858005	861475
AR0509.AR0510	9863989059	7454706546	3619738854	273561647	2047819
AR0509.AR0511	9866941801	7914233438	3620822407	2904246761	1344225
AR0509.AR0512	9849739454	7243830348	3614509747	2658232283	2302149
AR0509.AR0514	9944861947	6837717107	3649416374	2509202934	1215419
AR0509.AR0515	9854708527	7481363802	3616333223	274539875	1955254
AR0509.AR0516	9901703782	6894074597	3633578838	252988416	1900578
AR0509.AR0517	1041151112	6421977293	3820660294	2356640968	693388
AR0509.AR0518	9042062725	8203743569	3318120647	3010486849	2108109
AR0509.AR0519	9987155617	6869159501	3664936671	2520741192	2076306
AR0509.AR0520	1037203219	6621517751	3806172907	2429865334	566443
AR0509.AR0521	9783366281	7106006796	3590153115	2607655862	1468241
AR0509.AR0522	9854098314	6858404899	3616109296	2516794629	1329816
AR0509.AR0523	9902993073	7324145601	3634051962	2687705171	1971810
AR0509.AR0524	9711469572	1127812036	3563769539	4138675562	26486
AR0509.AR0526	1004352755	6379448539	3685623198	2341034404	1803600
AR0509.AR0527	9730142894	7196785914	3570621995	2640968622	1332793
AR0509.AR0528	9821863406	7078232924	3604280213	2597463823	1265451
AR0510.AR0511	9634803673	7855766522	3535635836	2882791449	1534649
AR0510.AR0512	1003545008	7009539765	3682659049	2572255837	2639590
AR0510.AR0514	9877364892	6902347585	3624647316	2532920058	1387575
AR0510.AR0515	9378192699	8224534658	3441468587	3018116452	2238832
AR0510.AR0516	9336703827	8173421335	3426243623	299935965	2176544
AR0510.AR0517	1049001536	6470167066	3849468602	2374324929	789709
AR0510.AR0518	9958438773	7616513082	3654398594	2794993807	2415158
AR0510.AR0519	980092191	7368797626	3596595417	2704090902	2378441
AR0510.AR0520	1043252021	6803601796	3828369894	2496683808	647602
AR0510.AR0521	981188568	7174753626	3600618737	2632883543	1675026
AR0510.AR0522	9862688155	6765120111	3619261468	2482562376	1516873
AR0510.AR0523	100124195	6921778414	3674207632	2540050492	2256873
AR0510.AR0524	9604606925	1138992739	3524554686	417970483	30035
AR0510.AR0526	1020934719	7062570818	3746473204	2591716378	2062070
AR0510.AR0527	9844580466	6986413142	3612616579	2563769176	1519461
AR0510.AR0528	9922642869	7705612747	364126275	2827690267	1442376
AR0511.AR0512	9896713921	7509165533	3631747733	2755601013	1724079
AR0511.AR0514	9899592191	7275277518	3632803957	2669772295	914536
AR0511.AR0515	83869918	8127538419	3077732539	2982522226	1467262
AR0511.AR0516	883906353	8263531734	3243627046	3032427014	1425987
AR0511.AR0517	1035943638	7354385766	3801550684	2698802254	522350
AR0511.AR0518	9941409635	7386240059	3648149496	2710491665	1579705
AR0511.AR0519	9923419493	7619507582	3641547744	2796092684	1556330
AR0511.AR0520	1022905331	686521099	3753704662	2519292227	425140
AR0511.AR0521	9671028537	7584122338	3548929094	2783107537	1105232
AR0511.AR0522	9475011408	8242602559	3476997666	3024746739	1001594
AR0511.AR0523	9870935761	7627845036	362228805	2799152238	1479609
AR0511.AR0524	9805757814	1308251896	3598370024	4800826713	20123
AR0511.AR0526	9904380589	7497275468	3634561132	2751237775	1356194
AR0511.AR0527	9743609573	767027146	3575563794	2814721251	1005819
AR0511.AR0528	993993944	7557600305	3647609986	2773374879	953279
AR0512.AR0514	9916115703	752106445	3638867508	2759967499	1559040
AR0512.AR0515	9905039886	7473381829	3634803071	2742469645	2518318
AR0512.AR0516	996161185	710415532	3655563002	2606976435	2448471
AR0512.AR0517	1044144847	6380468916	3831646251	2341408846	885849
AR0512.AR0518	9598749877	7966832262	3522405355	2923548689	2718435
AR0512.AR0519	1021414459	6868075128	3748233683	2520343265	2677888
AR0512.AR0520	1036529025	6379249278	380369885	2340961281	727902
AR0512.AR0521	9884711097	6926301835	3627343117	2541710429	1884189
AR0512.AR0522	9723897961	750569258	3568330323	275432656	1704419
AR0512.AR0523	1012930045	6786878272	3717098852	249054686	2539919
AR0512.AR0524	9951058735	1064165716	3651690378	3905115836	33809
AR0512.AR0526	9919198141	7423329305	3639998655	272410212	2320358
AR0512.AR0527	9905859298	7055366463	3635103766	2589072632	1707247
AR0512.AR0528	9941642853	7405739051	3648235079	2717647113	1620696
AR0514.AR0515	9797210782	7135551473	3595233563	2618497725	1329043
AR0514.AR0516	9780683554	7025749838	3589168648	2578204367	1291547
AR0514.AR0517	1029372442	6924744936	3777436694	2541139102	474957
AR0514.AR0518	9778060624	7698605114	3588206125	2825118711	1427758
AR0514.AR0519	9358807114	7430050746	3434354756	2726568654	1409668
AR0514.AR0520	1034190975	6706538706	3795119024	246106505	386644
AR0514.AR0521	9870235216	6692998249	3622030975	2456096176	1001844
AR0514.AR0522	9896629375	715587095	3631716708	2625954262	908518
AR0514.AR0523	912794054	7820022558	3349634801	2869674664	1341597
AR0514.AR0524	8627565792	1282440467	3166014776	4706107802	18408
AR0514.AR0526	9934061421	6874333823	3645452959	2522639987	1226314
AR0514.AR0527	9875644901	6891620911	362401614	2528983743	908539
AR0514.AR0528	1008811344	7082284796	3701984659	2598950718	862667
AR0515.AR0516	7515002388	8951419391	2757742934	3284857715	2080542
AR0515.AR0517	104279609	6221771189	3826696785	2283172333	757447
AR0515.AR0518	9864396117	7649191372	361988823	2806985596	2303654
AR0515.AR0519	9811356694	7126594518	3600424617	2615210836	2271221
AR0515.AR0520	1033736534	6221230758	3793451385	2282974014	620406
AR0515.AR0521	9713245359	6932859267	356442119	2544116778	1602392
AR0515.AR0522	9774081797	7294938309	3586746034	2676987117	1453150
AR0515.AR0523	9731458885	7091672085	3571104917	2602395525	2158388
AR0515.AR0524	9684589274	1233384296	355390541	4526088819	28819
AR0515.AR0526	9900917522	7012311131	3633290308	2573272831	1970916
AR0515.AR0527	9814613897	7229724471	3601619897	265305592	1452191
AR0515.AR0528	9854866407	6850412558	361639116	251386172	1378670
AR0516.AR0517	10383953	6672831772	3810547427	2448695785	735952
AR0516.AR0518	99185622	7099286053	3639765287	2605189585	2240356
AR0516.AR0519	9829597064	6813533772	3607118195	2500328496	2208425
AR0516.AR0520	1028082297	6217778635	3772702316	2281707206	602857
AR0516.AR0521	9716717402	7222437674	3565695309	2650381921	1558574
AR0516.AR0522	972476374	6919305385	3568648033	2539142977	1411854
AR0516.AR0523	9804675915	7157434966	3597973005	2626528201	2097292
AR0516.AR0524	9608811415	121199389	3526097587	4447593513	28221
AR0516.AR0526	9874467965	7122270101	3623584246	2613623926	1915940
AR0516.AR0527	9637924355	6853152476	3536781017	2514867174	1413664
AR0516.AR0528	9868737376	690229613	362148132	2532901176	1341128
AR0517.AR0518	1042827916	6321066447	3826813579	2319610218	812096
AR0517.AR0519	1034235641	6449578062	3795282933	2366769485	802151
AR0517.AR0520	1044071072	7085870195	3831375523	2600266434	220229
AR0517.AR0521	1036032917	6629710584	3801878309	2432871818	571578
AR0517.AR0522	1037089837	7141278647	3805756833	2620599398	520564
AR0517.AR0523	1029185513	6427315493	3776750731	2358599901	764652
AR0517.AR0524	9876179544	1671237614	3624212335	6132857296	10474
AR0517.AR0526	1043073469	5908764177	382771467	2168309711	699514
AR0517.AR0527	1040670428	6026772447	3818896349	2211614618	519349
AR0517.AR0528	1034868884	6992399823	3797606713	2565966078	492210
AR0518.AR0519	9846155913	734125372	3613194713	2693983252	2449284
AR0518.AR0520	1037634696	6399296669	3807756277	2348317973	666789
AR0518.AR0521	9843459196	707508079	3612205113	25963071	1724556
AR0518.AR0522	9825301608	7281226371	3605541913	2671955316	1561266
AR0518.AR0523	960530732	8444584129	3524811706	3098866908	2323500
AR0518.AR0524	956742658	1158648602	3510910801	4251834972	30841
AR0518.AR0526	1010023993	7223276243	3706434657	2650689646	2122444
AR0518.AR0527	9867121892	7392175829	3620888494	2712669885	1563387
AR0518.AR0528	9855939939	7599282513	3616785108	2788670791	1484697
AR0519.AR0520	1042737512	6684466256	3826481825	2452965233	657787
AR0519.AR0521	9993431635	6773729216	366723975	2485721617	1701904
AR0519.AR0522	1006625053	6880153106	3693961738	252477546	1541023
AR0519.AR0523	8451798844	8149417332	3101514456	2990551021	2291516
AR0519.AR0524	8210085844	1219732875	3012814242	4475992881	30669
AR0519.AR0526	1007763307	6946998042	369813873	2549305213	2092120
AR0519.AR0527	994305267	6598492944	3648752433	2421416036	1542963
AR0519.AR0528	1012178389	6703170179	3714340536	2459828919	1464478
AR0520.AR0521	1033352115	5810761129	3792040703	2132346022	464639
AR0520.AR0522	1023273931	6801228755	3755057294	2495812985	421421
AR0520.AR0523	1037400969	6667235267	3806898581	2446642063	625433
AR0520.AR0524	1015602732	1732949499	3726906679	635931832	8444
AR0520.AR0526	1031074309	6516451685	3783681953	2391309764	570632
AR0520.AR0527	1028830369	6491451354	3775447475	2382135518	419688
AR0520.AR0528	1020296203	7292856503	3744130074	2676223167	399281
AR0521.AR0522	9271218298	8106599331	3402212725	2974838313	1098103
AR0521.AR0523	9960388913	6916655474	3655114227	2538170552	1619052
AR0521.AR0524	9797882953	1214896714	3595480226	445824586	22125
AR0521.AR0526	9870062548	6903675703	3621967612	253340743	1481217
AR0521.AR0527	9863724634	6384991016	3619641819	2343068299	1101120
AR0521.AR0528	9632068535	7398595422	3534632136	271502565	1043987
AR0522.AR0523	9971474887	6681219325	3659182392	2451773723	1466497
AR0522.AR0524	9834166226	1362637411	3608794918	5000402525	20148
AR0522.AR0526	9938155405	7209115923	3646955308	2645493304	1342221
AR0522.AR0527	9617421492	6985001914	3529257184	2563251305	997003
AR0522.AR0528	9560526777	7571097007	3508378814	2778327697	946554
AR0523.AR0524	831268411	1200272195	3050464216	4404578994	29189
AR0523.AR0526	1016344827	6742147496	3729629907	247413223	1988393
AR0523.AR0527	9707279518	7251809359	3562231935	2661160301	1466763
AR0523.AR0528	1000456767	7114688767	3671326284	2610841842	1391173
AR0524.AR0526	9856431844	1216247465	361696562	4463202646	26760
AR0524.AR0527	9660533888	1219466283	3545077925	4475014581	20276
AR0524.AR0528	97655861	1267272316	3583628411	4650445995	19204
AR0526.AR0527	1006320151	6819382414	3692842854	2502474743	1345676
AR0526.AR0528	1007602255	7125913236	3697547725	2614960829	1275183
AR0527.AR0528	9725295816	7772885913	3568843286	2852377165	950434

## Sheet: E. Final Assignation
Individual1	Individual2	Site1	Site2	FinalAssignation	KIN_SG	KIN_1240K	READv2_SG	READv2_1240K	NSNPs_SG	NSNPs_1240K
AR0149	AR0151	Barrancas B6	Barrancas B6	Unrelated	Unrelated	Unrelated	Unrelated	Unrelated	326527	71873
AR0149	AR0152	Barrancas B6	Barrancas B6	Unrelated	Unrelated	Unrelated	Unrelated	Unrelated	127696	28027
AR0149	AR0161	Barrancas B6	Barrio Ramos	Unrelated	Unrelated	Unrelated	Unrelated	Unrelated	294169	66342
AR0149	AR0162	Barrancas B6	Barrio Ramos	Unrelated	Unrelated	Unrelated	Unrelated	Unrelated	569508	142301
AR0149	AR0180	Barrancas B6	Tumulo II	Unrelated	Unrelated	Unrelated	Unrelated	Unrelated	93511	21160
AR0149	AR0195	Barrancas B6	Potrero Las Colonias	Unrelated	Unrelated	Unrelated	Unrelated	Unrelated	20799	4977
AR0149	AR0500and513	Barrancas B6	Potrero Las Colonias	Unrelated	Unrelated	Unrelated	Unrelated	Unrelated	406117	99522
AR0149	AR0501	Barrancas B6	Potrero Las Colonias	Unrelated	Unrelated	Unrelated	Unrelated	Unrelated	227624	57181
AR0149	AR0503	Barrancas B6	Potrero Las Colonias	Unrelated	Unrelated	Unrelated	Unrelated	Unrelated	30199	8096
AR0149	AR0504	Barrancas B6	Potrero Las Colonias	Unrelated	Unrelated	Unrelated	Unrelated	Unrelated	878917	211483
AR0149	AR0505	Barrancas B6	Potrero Las Colonias	Unrelated	Unrelated	Unrelated	Unrelated	Unrelated	865851	209592
AR0149	AR0506	Barrancas B6	Potrero Las Colonias	Unrelated	Unrelated	Unrelated	Unrelated	Unrelated	435835	110279
AR0149	AR0507	Barrancas B6	Potrero Las Colonias	Unrelated	Unrelated	Unrelated	Unrelated	Unrelated	393396	97193
AR0149	AR0508	Barrancas B6	Potrero Las Colonias	Unrelated	Unrelated	Unrelated	Unrelated	Unrelated	468014	116749
AR0149	AR0509	Barrancas B6	Potrero Las Colonias	Unrelated	Unrelated	Unrelated	Unrelated	Unrelated	705836	170162
AR0149	AR0510	Barrancas B6	Potrero Las Colonias	Unrelated	Unrelated	Unrelated	Unrelated	Unrelated	814291	192658
AR0149	AR0511	Barrancas B6	Potrero Las Colonias	Unrelated	Unrelated	Unrelated	Unrelated	Unrelated	526467	128639
AR0149	AR0512	Barrancas B6	Potrero Las Colonias	Unrelated	Unrelated	Unrelated	Unrelated	Unrelated	913989	215425
AR0149	AR0514	Barrancas B6	Potrero Las Colonias	Unrelated	Unrelated	Unrelated	Unrelated	Unrelated	472415	117499
AR0149	AR0515	Barrancas B6	Potrero Las Colonias	Unrelated	Unrelated	Unrelated	Unrelated	Unrelated	773394	185567
AR0149	AR0516	Barrancas B6	Potrero Las Colonias	Unrelated	Unrelated	Unrelated	Unrelated	Unrelated	751893	180081
AR0149	AR0517	Barrancas B6	Potrero Las Colonias	Unrelated	Unrelated	Unrelated	Unrelated	Unrelated	265853	67739
AR0149	AR0518	Barrancas B6	Potrero Las Colonias	Unrelated	Unrelated	Unrelated	Unrelated	Unrelated	838098	197663
AR0149	AR0519	Barrancas B6	Potrero Las Colonias	Unrelated	Unrelated	Unrelated	Unrelated	Unrelated	822630	195713
AR0149	AR0520	Barrancas B6	Potrero Las Colonias	Unrelated	Unrelated	Unrelated	Unrelated	Unrelated	223518	53649
AR0149	AR0521	Barrancas B6	Potrero Las Colonias	Unrelated	Unrelated	Unrelated	Unrelated	Unrelated	568555	141906
AR0149	AR0522	Barrancas B6	Potrero Las Colonias	Unrelated	Unrelated	Unrelated	Unrelated	Unrelated	514524	129336
AR0149	AR0523	Barrancas B6	Potrero Las Colonias	Unrelated	Unrelated	Unrelated	Unrelated	Unrelated	777344	188295
AR0149	AR0524	Barrancas B6	Potrero Las Colonias	Unrelated	Unrelated	Unrelated	Unrelated	Unrelated	9990	2715
AR0149	AR0526	Barrancas B6	Potrero Las Colonias	Unrelated	Unrelated	Unrelated	Unrelated	Unrelated	705889	172361
AR0149	AR0527	Barrancas B6	Potrero Las Colonias	Unrelated	Unrelated	Unrelated	Unrelated	Unrelated	512823	129263
AR0149	AR0528	Barrancas B6	Potrero Las Colonias	Unrelated	Unrelated	Unrelated	Unrelated	Unrelated	488929	120934
AR0151	AR0152	Barrancas B6	Barrancas B6	Unrelated	Unrelated	Unrelated	Unrelated	Unrelated	214165	46708
AR0151	AR0161	Barrancas B6	Barrio Ramos	Unrelated	Unrelated	Unrelated	Unrelated	Unrelated	490922	110245
AR0151	AR0162	Barrancas B6	Barrio Ramos	Unrelated	Unrelated	Unrelated	Unrelated	Unrelated	942193	233236
AR0151	AR0180	Barrancas B6	Tumulo II	Unrelated	Unrelated	Unrelated	Unrelated	Unrelated	158338	35148
AR0151	AR0195	Barrancas B6	Potrero Las Colonias	Unrelated	Unrelated	Unrelated	Unrelated	Unrelated	34892	8171
AR0151	AR0500and513	Barrancas B6	Potrero Las Colonias	Unrelated	Unrelated	Unrelated	Unrelated	Unrelated	670663	163131
AR0151	AR0501	Barrancas B6	Potrero Las Colonias	Unrelated	Unrelated	Unrelated	Unrelated	Unrelated	376422	94307
AR0151	AR0503	Barrancas B6	Potrero Las Colonias	Unrelated	Unrelated	Unrelated	Unrelated	Unrelated	50466	13521
AR0151	AR0504	Barrancas B6	Potrero Las Colonias	Unrelated	Unrelated	Unrelated	Unrelated	Unrelated	1456849	347368
AR0151	AR0505	Barrancas B6	Potrero Las Colonias	Unrelated	Unrelated	Unrelated	Unrelated	Unrelated	1432184	343869
AR0151	AR0506	Barrancas B6	Potrero Las Colonias	Unrelated	Unrelated	Unrelated	Unrelated	Unrelated	716187	180144
AR0151	AR0507	Barrancas B6	Potrero Las Colonias	Unrelated	Unrelated	Unrelated	Unrelated	Unrelated	649120	159095
AR0151	AR0508	Barrancas B6	Potrero Las Colonias	Unrelated	Unrelated	Unrelated	Unrelated	Unrelated	771210	190910
AR0151	AR0509	Barrancas B6	Potrero Las Colonias	Unrelated	Unrelated	Unrelated	Unrelated	Unrelated	1168462	279082
AR0151	AR0510	Barrancas B6	Potrero Las Colonias	Unrelated	Unrelated	Unrelated	Unrelated	Unrelated	1349962	316058
AR0151	AR0511	Barrancas B6	Potrero Las Colonias	Unrelated	Unrelated	Unrelated	Unrelated	Unrelated	868875	210555
AR0151	AR0512	Barrancas B6	Potrero Las Colonias	Unrelated	Unrelated	Unrelated	Unrelated	Unrelated	1515714	353981
AR0151	AR0514	Barrancas B6	Potrero Las Colonias	Unrelated	Unrelated	Unrelated	Unrelated	Unrelated	782684	192457
AR0151	AR0515	Barrancas B6	Potrero Las Colonias	Unrelated	Unrelated	Unrelated	Unrelated	Unrelated	1284327	304850
AR0151	AR0516	Barrancas B6	Potrero Las Colonias	Unrelated	Unrelated	Unrelated	Unrelated	Unrelated	1247060	295985
AR0151	AR0517	Barrancas B6	Potrero Las Colonias	Unrelated	Unrelated	Unrelated	Unrelated	Unrelated	439728	111430
AR0151	AR0518	Barrancas B6	Potrero Las Colonias	Unrelated	Unrelated	Unrelated	Unrelated	Unrelated	1389918	324475
AR0151	AR0519	Barrancas B6	Potrero Las Colonias	Unrelated	Unrelated	Unrelated	Unrelated	Unrelated	1363178	321416
AR0151	AR0520	Barrancas B6	Potrero Las Colonias	Unrelated	Unrelated	Unrelated	Unrelated	Unrelated	371947	88755
AR0151	AR0521	Barrancas B6	Potrero Las Colonias	Unrelated	Unrelated	Unrelated	Unrelated	Unrelated	939133	232072
AR0151	AR0522	Barrancas B6	Potrero Las Colonias	Unrelated	Unrelated	Unrelated	Unrelated	Unrelated	849579	211541
AR0151	AR0523	Barrancas B6	Potrero Las Colonias	Unrelated	Unrelated	Unrelated	Unrelated	Unrelated	1291278	309393
AR0151	AR0524	Barrancas B6	Potrero Las Colonias	Unrelated	Unrelated	Unrelated	Unrelated	Unrelated	16333	4384
AR0151	AR0526	Barrancas B6	Potrero Las Colonias	Unrelated	Unrelated	Unrelated	Unrelated	Unrelated	1169919	282945
AR0151	AR0527	Barrancas B6	Potrero Las Colonias	Unrelated	Unrelated	Unrelated	Unrelated	Unrelated	843496	210966
AR0151	AR0528	Barrancas B6	Potrero Las Colonias	Unrelated	Unrelated	Unrelated	Unrelated	Unrelated	806170	198714
AR0152	AR0161	Barrancas B6	Barrio Ramos	Unrelated	Unrelated	Unrelated	Unrelated	Unrelated	191509	43232
AR0152	AR0162	Barrancas B6	Barrio Ramos	Unrelated	Unrelated	Unrelated	Unrelated	Unrelated	369450	91962
AR0152	AR0180	Barrancas B6	Tumulo II	Unrelated	Unrelated	Unrelated	Unrelated	Unrelated	61556	13775
AR0152	AR0195	Barrancas B6	Potrero Las Colonias	Unrelated	Unrelated	Unrelated	Unrelated	Unrelated	13757	3324
AR0152	AR0500and513	Barrancas B6	Potrero Las Colonias	Unrelated	Unrelated	Unrelated	Unrelated	Unrelated	263570	64217
AR0152	AR0501	Barrancas B6	Potrero Las Colonias	Unrelated	Unrelated	Unrelated	Unrelated	Unrelated	147589	37298
AR0152	AR0503	Barrancas B6	Potrero Las Colonias	Unrelated	Unrelated	Unrelated	Unrelated	Unrelated	19866	5151
AR0152	AR0504	Barrancas B6	Potrero Las Colonias	Unrelated	Unrelated	Unrelated	Unrelated	Unrelated	571142	136733
AR0152	AR0505	Barrancas B6	Potrero Las Colonias	Unrelated	Unrelated	Unrelated	Unrelated	Unrelated	562310	135390
AR0152	AR0506	Barrancas B6	Potrero Las Colonias	Unrelated	Unrelated	Unrelated	Unrelated	Unrelated	281306	70803
AR0152	AR0507	Barrancas B6	Potrero Las Colonias	Unrelated	Unrelated	Unrelated	Unrelated	Unrelated	254455	62826
AR0152	AR0508	Barrancas B6	Potrero Las Colonias	Unrelated	Unrelated	Unrelated	Unrelated	Unrelated	301842	74958
AR0152	AR0509	Barrancas B6	Potrero Las Colonias	Unrelated	Unrelated	Unrelated	Unrelated	Unrelated	457945	109757
AR0152	AR0510	Barrancas B6	Potrero Las Colonias	Unrelated	Unrelated	Unrelated	Unrelated	Unrelated	528926	124421
AR0152	AR0511	Barrancas B6	Potrero Las Colonias	Unrelated	Unrelated	Unrelated	Unrelated	Unrelated	341963	83126
AR0152	AR0512	Barrancas B6	Potrero Las Colonias	Unrelated	Unrelated	Unrelated	Unrelated	Unrelated	594312	139272
AR0152	AR0514	Barrancas B6	Potrero Las Colonias	Unrelated	Unrelated	Unrelated	Unrelated	Unrelated	307049	75981
AR0152	AR0515	Barrancas B6	Potrero Las Colonias	Unrelated	Unrelated	Unrelated	Unrelated	Unrelated	503514	120063
AR0152	AR0516	Barrancas B6	Potrero Las Colonias	Unrelated	Unrelated	Unrelated	Unrelated	Unrelated	489265	116405
AR0152	AR0517	Barrancas B6	Potrero Las Colonias	Unrelated	Unrelated	Unrelated	Unrelated	Unrelated	173135	43531
AR0152	AR0518	Barrancas B6	Potrero Las Colonias	Unrelated	Unrelated	Unrelated	Unrelated	Unrelated	545335	127889
AR0152	AR0519	Barrancas B6	Potrero Las Colonias	Unrelated	Unrelated	Unrelated	Unrelated	Unrelated	534066	126366
AR0152	AR0520	Barrancas B6	Potrero Las Colonias	Unrelated	Unrelated	Unrelated	Unrelated	Unrelated	145691	34736
AR0152	AR0521	Barrancas B6	Potrero Las Colonias	Unrelated	Unrelated	Unrelated	Unrelated	Unrelated	368866	91574
AR0152	AR0522	Barrancas B6	Potrero Las Colonias	Unrelated	Unrelated	Unrelated	Unrelated	Unrelated	333560	83680
AR0152	AR0523	Barrancas B6	Potrero Las Colonias	Unrelated	Unrelated	Unrelated	Unrelated	Unrelated	505631	121624
AR0152	AR0524	Barrancas B6	Potrero Las Colonias	Unrelated	Unrelated	Unrelated	Unrelated	Unrelated	6185	1699
AR0152	AR0526	Barrancas B6	Potrero Las Colonias	Unrelated	Unrelated	Unrelated	Unrelated	Unrelated	458766	111251
AR0152	AR0527	Barrancas B6	Potrero Las Colonias	Unrelated	Unrelated	Unrelated	Unrelated	Unrelated	331428	83352
AR0152	AR0528	Barrancas B6	Potrero Las Colonias	Unrelated	Unrelated	Unrelated	Unrelated	Unrelated	316027	78062
AR0161	AR0162	Barrio Ramos	Barrio Ramos	Parent-Child	Parent-Child	Parent-Child	First Degree	First Degree	870867	219718
AR0161	AR0180	Barrio Ramos	Tumulo II	Unrelated	Unrelated	Unrelated	Unrelated	Unrelated	142361	32558
AR0161	AR0195	Barrio Ramos	Potrero Las Colonias	Unrelated	Unrelated	Unrelated	Unrelated	Unrelated	31635	7568
AR0161	AR0500and513	Barrio Ramos	Potrero Las Colonias	Unrelated	Unrelated	Unrelated	Unrelated	Unrelated	620032	153989
AR0161	AR0501	Barrio Ramos	Potrero Las Colonias	Unrelated	Unrelated	Unrelated	Unrelated	Unrelated	349197	89313
AR0161	AR0503	Barrio Ramos	Potrero Las Colonias	Unrelated	Unrelated	Unrelated	Unrelated	Unrelated	47336	12884
AR0161	AR0504	Barrio Ramos	Potrero Las Colonias	Unrelated	Unrelated	Unrelated	Unrelated	Unrelated	1341410	326339
AR0161	AR0505	Barrio Ramos	Potrero Las Colonias	Unrelated	Unrelated	Unrelated	Unrelated	Unrelated	1324061	323452
AR0161	AR0506	Barrio Ramos	Potrero Las Colonias	Unrelated	Unrelated	Unrelated	Unrelated	Unrelated	667841	170762
AR0161	AR0507	Barrio Ramos	Potrero Las Colonias	Unrelated	Unrelated	Unrelated	Unrelated	Unrelated	602629	150824
AR0161	AR0508	Barrio Ramos	Potrero Las Colonias	Unrelated	Unrelated	Unrelated	Unrelated	Unrelated	715034	180127
AR0161	AR0509	Barrio Ramos	Potrero Las Colonias	Unrelated	Unrelated	Unrelated	Unrelated	Unrelated	1074983	262380
AR0161	AR0510	Barrio Ramos	Potrero Las Colonias	Unrelated	Unrelated	Unrelated	Unrelated	Unrelated	1237825	296839
AR0161	AR0511	Barrio Ramos	Potrero Las Colonias	Unrelated	Unrelated	Unrelated	Unrelated	Unrelated	801865	198088
AR0161	AR0512	Barrio Ramos	Potrero Las Colonias	Unrelated	Unrelated	Unrelated	Unrelated	Unrelated	1393736	331928
AR0161	AR0514	Barrio Ramos	Potrero Las Colonias	Unrelated	Unrelated	Unrelated	Unrelated	Unrelated	722431	181365
AR0161	AR0515	Barrio Ramos	Potrero Las Colonias	Unrelated	Unrelated	Unrelated	Unrelated	Unrelated	1178647	286167
AR0161	AR0516	Barrio Ramos	Potrero Las Colonias	Unrelated	Unrelated	Unrelated	Unrelated	Unrelated	1146760	277871
AR0161	AR0517	Barrio Ramos	Potrero Las Colonias	Unrelated	Unrelated	Unrelated	Unrelated	Unrelated	406338	104602
AR0161	AR0518	Barrio Ramos	Potrero Las Colonias	Unrelated	Unrelated	Unrelated	Unrelated	Unrelated	1276383	304730
AR0161	AR0519	Barrio Ramos	Potrero Las Colonias	Unrelated	Unrelated	Unrelated	Unrelated	Unrelated	1254117	301948
AR0161	AR0520	Barrio Ramos	Potrero Las Colonias	Unrelated	Unrelated	Unrelated	Unrelated	Unrelated	339246	82714
AR0161	AR0521	Barrio Ramos	Potrero Las Colonias	Unrelated	Unrelated	Unrelated	Unrelated	Unrelated	871742	219698
AR0161	AR0522	Barrio Ramos	Potrero Las Colonias	Unrelated	Unrelated	Unrelated	Unrelated	Unrelated	786906	199976
AR0161	AR0523	Barrio Ramos	Potrero Las Colonias	Unrelated	Unrelated	Unrelated	Unrelated	Unrelated	1185419	290192
AR0161	AR0524	Barrio Ramos	Potrero Las Colonias	Unrelated	Unrelated	Unrelated	Unrelated	Unrelated	15072	4123
AR0161	AR0526	Barrio Ramos	Potrero Las Colonias	Unrelated	Unrelated	Unrelated	Unrelated	Unrelated	1076811	265816
AR0161	AR0527	Barrio Ramos	Potrero Las Colonias	Unrelated	Unrelated	Unrelated	Unrelated	Unrelated	786217	199914
AR0161	AR0528	Barrio Ramos	Potrero Las Colonias	Unrelated	Unrelated	Unrelated	Unrelated	Unrelated	748743	187430
AR0162	AR0180	Barrio Ramos	Tumulo II	Unrelated	Unrelated	Unrelated	Unrelated	Unrelated	273457	68130
AR0162	AR0195	Barrio Ramos	Potrero Las Colonias	Unrelated	Unrelated	Unrelated	Unrelated	Unrelated	62923	16655
AR0162	AR0500and513	Barrio Ramos	Potrero Las Colonias	Unrelated	Unrelated	Unrelated	Unrelated	Unrelated	1273715	336975
AR0162	AR0501	Barrio Ramos	Potrero Las Colonias	Unrelated	Unrelated	Unrelated	Unrelated	Unrelated	726657	196279
AR0162	AR0503	Barrio Ramos	Potrero Las Colonias	Unrelated	Unrelated	Unrelated	Unrelated	Unrelated	99530	28393
AR0162	AR0504	Barrio Ramos	Potrero Las Colonias	Unrelated	Unrelated	Unrelated	Unrelated	Unrelated	2745614	711392
AR0162	AR0505	Barrio Ramos	Potrero Las Colonias	Unrelated	Unrelated	Unrelated	Unrelated	Unrelated	2716268	706348
AR0162	AR0506	Barrio Ramos	Potrero Las Colonias	Unrelated	Unrelated	Unrelated	Unrelated	Unrelated	1394179	376658
AR0162	AR0507	Barrio Ramos	Potrero Las Colonias	Unrelated	Unrelated	Unrelated	Unrelated	Unrelated	1245518	330637
AR0162	AR0508	Barrio Ramos	Potrero Las Colonias	Unrelated	Unrelated	Unrelated	Unrelated	Unrelated	1483309	396518
AR0162	AR0509	Barrio Ramos	Potrero Las Colonias	Unrelated	Unrelated	Unrelated	Unrelated	Unrelated	2195484	573600
AR0162	AR0510	Barrio Ramos	Potrero Las Colonias	Unrelated	Unrelated	Unrelated	Unrelated	Unrelated	2513135	647095
AR0162	AR0511	Barrio Ramos	Potrero Las Colonias	Unrelated	Unrelated	Unrelated	Unrelated	Unrelated	1649650	434393
AR0162	AR0512	Barrio Ramos	Potrero Las Colonias	Unrelated	Unrelated	Unrelated	Unrelated	Unrelated	2830536	722975
AR0162	AR0514	Barrio Ramos	Potrero Las Colonias	Unrelated	Unrelated	Unrelated	Unrelated	Unrelated	1489368	396291
AR0162	AR0515	Barrio Ramos	Potrero Las Colonias	Unrelated	Unrelated	Unrelated	Unrelated	Unrelated	2401998	623497
AR0162	AR0516	Barrio Ramos	Potrero Las Colonias	Unrelated	Unrelated	Unrelated	Unrelated	Unrelated	2334181	605901
AR0162	AR0517	Barrio Ramos	Potrero Las Colonias	Unrelated	Unrelated	Unrelated	Unrelated	Unrelated	842787	229016
AR0162	AR0518	Barrio Ramos	Potrero Las Colonias	Unrelated	Unrelated	Unrelated	Unrelated	Unrelated	2585464	663564
AR0162	AR0519	Barrio Ramos	Potrero Las Colonias	Unrelated	Unrelated	Unrelated	Unrelated	Unrelated	2550307	658598
AR0162	AR0520	Barrio Ramos	Potrero Las Colonias	Unrelated	Unrelated	Unrelated	Unrelated	Unrelated	686932	178700
AR0162	AR0521	Barrio Ramos	Potrero Las Colonias	Unrelated	Unrelated	Unrelated	Unrelated	Unrelated	1803717	481823
AR0162	AR0522	Barrio Ramos	Potrero Las Colonias	Unrelated	Unrelated	Unrelated	Unrelated	Unrelated	1633708	439121
AR0162	AR0523	Barrio Ramos	Potrero Las Colonias	Unrelated	Unrelated	Unrelated	Unrelated	Unrelated	2424506	632447
AR0162	AR0524	Barrio Ramos	Potrero Las Colonias	Unrelated	Unrelated	Unrelated	Unrelated	Unrelated	32634	9160
AR0162	AR0526	Barrio Ramos	Potrero Las Colonias	Unrelated	Unrelated	Unrelated	Unrelated	Unrelated	2216261	582193
AR0162	AR0527	Barrio Ramos	Potrero Las Colonias	Unrelated	Unrelated	Unrelated	Unrelated	Unrelated	1636935	440603
AR0162	AR0528	Barrio Ramos	Potrero Las Colonias	Unrelated	Unrelated	Unrelated	Unrelated	Unrelated	1552294	413783
AR0180	AR0195	Tumulo II	Potrero Las Colonias	Unrelated	Unrelated	Unrelated	Unrelated	Unrelated	10350	2458
AR0180	AR0500and513	Tumulo II	Potrero Las Colonias	Unrelated	Unrelated	Unrelated	Unrelated	Unrelated	194350	47822
AR0180	AR0501	Tumulo II	Potrero Las Colonias	Unrelated	Unrelated	Unrelated	Unrelated	Unrelated	109714	27601
AR0180	AR0503	Tumulo II	Potrero Las Colonias	Unrelated	Unrelated	Unrelated	Unrelated	Unrelated	14902	3853
AR0180	AR0504	Tumulo II	Potrero Las Colonias	Unrelated	Unrelated	Unrelated	Unrelated	Unrelated	421370	101219
AR0180	AR0505	Tumulo II	Potrero Las Colonias	Unrelated	Unrelated	Unrelated	Unrelated	Unrelated	414896	100421
AR0180	AR0506	Tumulo II	Potrero Las Colonias	Unrelated	Unrelated	Unrelated	Unrelated	Unrelated	208183	52713
AR0180	AR0507	Tumulo II	Potrero Las Colonias	Unrelated	Unrelated	Unrelated	Unrelated	Unrelated	189526	46940
AR0180	AR0508	Tumulo II	Potrero Las Colonias	Unrelated	Unrelated	Unrelated	Unrelated	Unrelated	224871	56068
AR0180	AR0509	Tumulo II	Potrero Las Colonias	Unrelated	Unrelated	Unrelated	Unrelated	Unrelated	336827	81334
AR0180	AR0510	Tumulo II	Potrero Las Colonias	Unrelated	Unrelated	Unrelated	Unrelated	Unrelated	388199	92271
AR0180	AR0511	Tumulo II	Potrero Las Colonias	Unrelated	Unrelated	Unrelated	Unrelated	Unrelated	250873	61423
AR0180	AR0512	Tumulo II	Potrero Las Colonias	Unrelated	Unrelated	Unrelated	Unrelated	Unrelated	437433	103061
AR0180	AR0514	Tumulo II	Potrero Las Colonias	Unrelated	Unrelated	Unrelated	Unrelated	Unrelated	227270	56511
AR0180	AR0515	Tumulo II	Potrero Las Colonias	Unrelated	Unrelated	Unrelated	Unrelated	Unrelated	371021	89051
AR0180	AR0516	Tumulo II	Potrero Las Colonias	Unrelated	Unrelated	Unrelated	Unrelated	Unrelated	359891	86370
AR0180	AR0517	Tumulo II	Potrero Las Colonias	Unrelated	Unrelated	Unrelated	Unrelated	Unrelated	128574	32859
AR0180	AR0518	Tumulo II	Potrero Las Colonias	Unrelated	Unrelated	Unrelated	Unrelated	Unrelated	399975	94528
AR0180	AR0519	Tumulo II	Potrero Las Colonias	Unrelated	Unrelated	Unrelated	Unrelated	Unrelated	394282	93842
AR0180	AR0520	Tumulo II	Potrero Las Colonias	Unrelated	Unrelated	Unrelated	Unrelated	Unrelated	107943	25911
AR0180	AR0521	Tumulo II	Potrero Las Colonias	Unrelated	Unrelated	Unrelated	Unrelated	Unrelated	272884	67962
AR0180	AR0522	Tumulo II	Potrero Las Colonias	Unrelated	Unrelated	Unrelated	Unrelated	Unrelated	246932	61894
AR0180	AR0523	Tumulo II	Potrero Las Colonias	Unrelated	Unrelated	Unrelated	Unrelated	Unrelated	373373	90257
AR0180	AR0524	Tumulo II	Potrero Las Colonias	Unrelated	Unrelated	Unrelated	Unrelated	Unrelated	4866	1290
AR0180	AR0526	Tumulo II	Potrero Las Colonias	Unrelated	Unrelated	Unrelated	Unrelated	Unrelated	338284	82456
AR0180	AR0527	Tumulo II	Potrero Las Colonias	Unrelated	Unrelated	Unrelated	Unrelated	Unrelated	245978	61886
AR0180	AR0528	Tumulo II	Potrero Las Colonias	Unrelated	Unrelated	Unrelated	Unrelated	Unrelated	234085	58166
AR0195	AR0503	Potrero Las Colonias	Potrero Las Colonias	Parent-Child	Parent-Child	Second Degree	First Degree	First Degree	3415	964
AR0195	AR0505	Potrero Las Colonias	Potrero Las Colonias	Parent-Child	Parent-Child	Parent-Child	First Degree	First Degree	95019	24258
AR0195	AR0507	Potrero Las Colonias	Potrero Las Colonias	Parent-Child	Parent-Child	Parent-Child	First Degree	First Degree	43776	11422
AR0195	AR0509	Potrero Las Colonias	Potrero Las Colonias	Unrelated	Unrelated	Unrelated	Unrelated	Third Degree	77109	19708
AR0195	AR0510	Potrero Las Colonias	Potrero Las Colonias	Third Degree	Third Degree	Second Degree	Third Degree	Second Degree	88419	22237
AR0195	AR0511	Potrero Las Colonias	Potrero Las Colonias	Parent-Child	Parent-Child	Parent-Child	First Degree	First Degree	57880	14975
AR0195	AR0515	Potrero Las Colonias	Potrero Las Colonias	Siblings	Siblings	Siblings	First Degree	First Degree	84786	21557
AR0195	AR0516	Potrero Las Colonias	Potrero Las Colonias	Siblings	Siblings	Siblings	First Degree	First Degree	82329	20959
AR0195	AR0521	Potrero Las Colonias	Potrero Las Colonias	Unrelated - maybe Third Degree	Unrelated	Third Degree	Unrelated	Third Degree	62800	16472
AR0195	AR0522	Potrero Las Colonias	Potrero Las Colonias	Unrelated - maybe Third Degree	Unrelated	Third Degree	Unrelated	Unrelated	56782	14821
AR0195	AR0527	Potrero Las Colonias	Potrero Las Colonias	Unrelated	Unrelated	Unrelated	Unrelated	Unrelated/Consistent with Third Degree	56571	15024
AR0195	AR0500and513	Potrero Las Colonias	Potrero Las Colonias	Unrelated	Unrelated	Unrelated	Unrelated	Unrelated	44655	11499
AR0195	AR0501	Potrero Las Colonias	Potrero Las Colonias	Unrelated	Unrelated	Unrelated	Unrelated	Unrelated	25547	6688
AR0195	AR0504	Potrero Las Colonias	Potrero Las Colonias	Unrelated	Unrelated	Unrelated	Unrelated	Unrelated	96173	24439
AR0195	AR0506	Potrero Las Colonias	Potrero Las Colonias	Unrelated	Unrelated	Unrelated	Unrelated	Unrelated	48275	12744
AR0195	AR0508	Potrero Las Colonias	Potrero Las Colonias	Unrelated	Unrelated	Unrelated	Unrelated	Unrelated	51908	13654
AR0195	AR0512	Potrero Las Colonias	Potrero Las Colonias	Unrelated	Unrelated	Unrelated	Unrelated	Unrelated	99722	24899
AR0195	AR0514	Potrero Las Colonias	Potrero Las Colonias	Unrelated	Unrelated	Unrelated	Unrelated	Unrelated	52850	13581
AR0195	AR0517	Potrero Las Colonias	Potrero Las Colonias	Unrelated	Unrelated	Unrelated	Unrelated	Unrelated	29590	7790
AR0195	AR0518	Potrero Las Colonias	Potrero Las Colonias	Unrelated	Unrelated	Unrelated	Unrelated	Unrelated	91232	22860
AR0195	AR0519	Potrero Las Colonias	Potrero Las Colonias	Unrelated	Unrelated	Unrelated	Unrelated	Unrelated	89872	22561
AR0195	AR0520	Potrero Las Colonias	Potrero Las Colonias	Unrelated	Unrelated	Unrelated	Unrelated	Unrelated	24553	6229
AR0195	AR0523	Potrero Las Colonias	Potrero Las Colonias	Unrelated	Unrelated	Unrelated	Unrelated	Unrelated	85221	21709
AR0195	AR0524	Potrero Las Colonias	Potrero Las Colonias	Unrelated	Unrelated	Unrelated	Unrelated	Unrelated	1125	318
AR0195	AR0526	Potrero Las Colonias	Potrero Las Colonias	Unrelated	Unrelated	Unrelated	Unrelated	Unrelated	77725	19900
AR0195	AR0528	Potrero Las Colonias	Potrero Las Colonias	Unrelated	Unrelated	Unrelated	Unrelated	Unrelated	54087	14138
AR0500and513	AR0528	Potrero Las Colonias	Potrero Las Colonias	Third Degree	Third Degree	Third Degree	Third Degree	Third Degree	1101178	289230
AR0500and513	AR0501	Potrero Las Colonias	Potrero Las Colonias	Unrelated	Unrelated	Unrelated	Unrelated	Unrelated	516400	137763
AR0500and513	AR0503	Potrero Las Colonias	Potrero Las Colonias	Unrelated	Unrelated	Unrelated	Unrelated	Unrelated	70842	19804
AR0500and513	AR0504	Potrero Las Colonias	Potrero Las Colonias	Unrelated	Unrelated	Unrelated	Unrelated	Unrelated	1941069	496045
AR0500and513	AR0505	Potrero Las Colonias	Potrero Las Colonias	Unrelated	Unrelated	Unrelated	Unrelated	Unrelated	1919025	492578
AR0500and513	AR0506	Potrero Las Colonias	Potrero Las Colonias	Unrelated	Unrelated	Unrelated	Unrelated	Unrelated	989631	264104
AR0500and513	AR0507	Potrero Las Colonias	Potrero Las Colonias	Unrelated	Unrelated	Unrelated	Unrelated	Unrelated	882618	231175
AR0500and513	AR0508	Potrero Las Colonias	Potrero Las Colonias	Unrelated	Unrelated	Unrelated	Unrelated	Unrelated	1052491	277655
AR0500and513	AR0509	Potrero Las Colonias	Potrero Las Colonias	Unrelated	Unrelated	Unrelated	Unrelated	Unrelated	1556553	400237
AR0500and513	AR0510	Potrero Las Colonias	Potrero Las Colonias	Unrelated	Unrelated	Unrelated	Unrelated	Unrelated	1781568	451970
AR0500and513	AR0511	Potrero Las Colonias	Potrero Las Colonias	Unrelated	Unrelated	Unrelated	Unrelated	Unrelated	1169580	304010
AR0500and513	AR0512	Potrero Las Colonias	Potrero Las Colonias	Unrelated	Unrelated	Unrelated	Unrelated	Unrelated	2002639	504084
AR0500and513	AR0514	Potrero Las Colonias	Potrero Las Colonias	Unrelated	Unrelated	Unrelated	Unrelated	Unrelated	1056965	278805
AR0500and513	AR0515	Potrero Las Colonias	Potrero Las Colonias	Unrelated	Unrelated	Unrelated	Unrelated	Unrelated	1701847	435513
AR0500and513	AR0516	Potrero Las Colonias	Potrero Las Colonias	Unrelated	Unrelated	Unrelated	Unrelated	Unrelated	1654547	423205
AR0500and513	AR0517	Potrero Las Colonias	Potrero Las Colonias	Unrelated	Unrelated	Unrelated	Unrelated	Unrelated	597572	161188
AR0500and513	AR0518	Potrero Las Colonias	Potrero Las Colonias	Unrelated	Unrelated	Unrelated	Unrelated	Unrelated	1833496	463880
AR0500and513	AR0519	Potrero Las Colonias	Potrero Las Colonias	Unrelated	Unrelated	Unrelated	Unrelated	Unrelated	1806643	459827
AR0500and513	AR0520	Potrero Las Colonias	Potrero Las Colonias	Unrelated	Unrelated	Unrelated	Unrelated	Unrelated	488894	125697
AR0500and513	AR0521	Potrero Las Colonias	Potrero Las Colonias	Unrelated	Unrelated	Unrelated	Unrelated	Unrelated	1277346	337157
AR0500and513	AR0522	Potrero Las Colonias	Potrero Las Colonias	Unrelated	Unrelated	Unrelated	Unrelated	Unrelated	1156826	307009
AR0500and513	AR0523	Potrero Las Colonias	Potrero Las Colonias	Unrelated	Unrelated	Unrelated	Unrelated	Unrelated	1715235	441872
AR0500and513	AR0524	Potrero Las Colonias	Potrero Las Colonias	Unrelated	Unrelated	Unrelated	Unrelated	Unrelated	23049	6320
AR0500and513	AR0526	Potrero Las Colonias	Potrero Las Colonias	Unrelated	Unrelated	Unrelated	Unrelated	Unrelated	1565826	406557
AR0500and513	AR0527	Potrero Las Colonias	Potrero Las Colonias	Unrelated	Unrelated	Unrelated	Unrelated	Unrelated	1159636	308213
AR0501	AR0504	Potrero Las Colonias	Potrero Las Colonias	Unrelated - maybe Third Degree	Unrelated	Unrelated	Third Degree	Third Degree	1102151	288211
AR0501	AR0512	Potrero Las Colonias	Potrero Las Colonias	Unrelated - maybe Third Degree	Unrelated	Unrelated	Third Degree	Third Degree	1133863	292771
AR0501	AR0521	Potrero Las Colonias	Potrero Las Colonias	Unrelated - maybe Third Degree	Unrelated	Unrelated	Third Degree	Third Degree	728488	196457
AR0501	AR0522	Potrero Las Colonias	Potrero Las Colonias	Third Degree - maybe Unrelated	Unrelated	Third Degree	Third Degree	Third Degree	661094	179067
AR0501	AR0503	Potrero Las Colonias	Potrero Las Colonias	Unrelated	Unrelated	Unrelated	Unrelated	Unrelated	40913	11737
AR0501	AR0505	Potrero Las Colonias	Potrero Las Colonias	Unrelated	Unrelated	Unrelated	Unrelated	Unrelated	1089386	286236
AR0501	AR0506	Potrero Las Colonias	Potrero Las Colonias	Unrelated	Unrelated	Unrelated	Unrelated	Unrelated	566562	154300
AR0501	AR0507	Potrero Las Colonias	Potrero Las Colonias	Unrelated	Unrelated	Unrelated	Unrelated	Unrelated	503816	134546
AR0501	AR0508	Potrero Las Colonias	Potrero Las Colonias	Unrelated	Unrelated	Unrelated	Unrelated	Unrelated	601394	162381
AR0501	AR0509	Potrero Las Colonias	Potrero Las Colonias	Unrelated	Unrelated	Unrelated	Unrelated	Unrelated	885065	233271
AR0501	AR0510	Potrero Las Colonias	Potrero Las Colonias	Unrelated	Unrelated	Unrelated	Unrelated	Unrelated	1008714	262506
AR0501	AR0511	Potrero Las Colonias	Potrero Las Colonias	Unrelated	Unrelated	Unrelated	Unrelated	Unrelated	667596	177139
AR0501	AR0514	Potrero Las Colonias	Potrero Las Colonias	Unrelated	Unrelated	Unrelated	Unrelated	Unrelated	602777	161981
AR0501	AR0515	Potrero Las Colonias	Potrero Las Colonias	Unrelated	Unrelated	Unrelated	Unrelated	Unrelated	966163	253106
AR0501	AR0516	Potrero Las Colonias	Potrero Las Colonias	Unrelated	Unrelated	Unrelated	Unrelated	Unrelated	939347	246249
AR0501	AR0517	Potrero Las Colonias	Potrero Las Colonias	Unrelated	Unrelated	Unrelated	Unrelated	Unrelated	343002	94349
AR0501	AR0518	Potrero Las Colonias	Potrero Las Colonias	Unrelated	Unrelated	Unrelated	Unrelated	Unrelated	1039414	269684
AR0501	AR0519	Potrero Las Colonias	Potrero Las Colonias	Unrelated	Unrelated	Unrelated	Unrelated	Unrelated	1024966	267394
AR0501	AR0520	Potrero Las Colonias	Potrero Las Colonias	Unrelated	Unrelated	Unrelated	Unrelated	Unrelated	277426	73056
AR0501	AR0523	Potrero Las Colonias	Potrero Las Colonias	Unrelated	Unrelated	Unrelated	Unrelated	Unrelated	975001	257031
AR0501	AR0524	Potrero Las Colonias	Potrero Las Colonias	Unrelated	Unrelated	Unrelated	Unrelated	Unrelated	13444	3781
AR0501	AR0526	Potrero Las Colonias	Potrero Las Colonias	Unrelated	Unrelated	Unrelated	Unrelated	Unrelated	891935	236754
AR0501	AR0527	Potrero Las Colonias	Potrero Las Colonias	Unrelated	Unrelated	Unrelated	Unrelated	Unrelated	663241	179729
AR0501	AR0528	Potrero Las Colonias	Potrero Las Colonias	Unrelated	Unrelated	Unrelated	Unrelated	Unrelated	628828	168854
AR0503	AR0505	Potrero Las Colonias	Potrero Las Colonias	Second Degree	Second Degree	Second Degree	Second Degree	Second Degree	149274	41339
AR0503	AR0507	Potrero Las Colonias	Potrero Las Colonias	Second Degree	Second Degree	Second Degree	Second Degree	Second Degree	69120	19573
AR0503	AR0510	Potrero Las Colonias	Potrero Las Colonias	Second Degree	Second Degree	Second Degree	Second Degree	Second Degree	137105	37886
AR0503	AR0511	Potrero Las Colonias	Potrero Las Colonias	Second Degree	Second Degree	Second Degree	Second Degree	Second Degree	91121	25320
AR0503	AR0515	Potrero Las Colonias	Potrero Las Colonias	Parent-Child	Parent-Child	Parent-Child	First Degree	First Degree	131397	36638
AR0503	AR0516	Potrero Las Colonias	Potrero Las Colonias	Parent-Child	Parent-Child	Parent-Child	First Degree	First Degree	128206	35573
AR0503	AR0524	Potrero Las Colonias	Potrero Las Colonias	Second Degree	Second Degree	Second Degree	Second Degree	Second Degree	2000	560
AR0503	AR0527	Potrero Las Colonias	Potrero Las Colonias	Unrelated	Unrelated	Unrelated	Third Degree	Unrelated	91380	25943
AR0503	AR0504	Potrero Las Colonias	Potrero Las Colonias	Unrelated	Unrelated	Unrelated	Unrelated	Unrelated	150605	41591
AR0503	AR0506	Potrero Las Colonias	Potrero Las Colonias	Unrelated	Unrelated	Unrelated	Unrelated	Unrelated	78247	22371
AR0503	AR0508	Potrero Las Colonias	Potrero Las Colonias	Unrelated	Unrelated	Unrelated	Unrelated	Unrelated	82543	23345
AR0503	AR0509	Potrero Las Colonias	Potrero Las Colonias	Unrelated	Unrelated	Unrelated	Unrelated	Unrelated	120421	33548
AR0503	AR0512	Potrero Las Colonias	Potrero Las Colonias	Unrelated	Unrelated	Unrelated	Unrelated	Unrelated	154131	42168
AR0503	AR0514	Potrero Las Colonias	Potrero Las Colonias	Unrelated	Unrelated	Unrelated	Unrelated	Unrelated	82676	23356
AR0503	AR0517	Potrero Las Colonias	Potrero Las Colonias	Unrelated	Unrelated	Unrelated	Unrelated	Unrelated	47227	13607
AR0503	AR0518	Potrero Las Colonias	Potrero Las Colonias	Unrelated	Unrelated	Unrelated	Unrelated	Unrelated	140869	38749
AR0503	AR0519	Potrero Las Colonias	Potrero Las Colonias	Unrelated	Unrelated	Unrelated	Unrelated	Unrelated	139537	38496
AR0503	AR0520	Potrero Las Colonias	Potrero Las Colonias	Unrelated	Unrelated	Unrelated	Unrelated	Unrelated	38022	10596
AR0503	AR0521	Potrero Las Colonias	Potrero Las Colonias	Unrelated	Unrelated	Unrelated	Unrelated	Unrelated	100376	28385
AR0503	AR0522	Potrero Las Colonias	Potrero Las Colonias	Unrelated	Unrelated	Unrelated	Unrelated	Unrelated	90934	25886
AR0503	AR0523	Potrero Las Colonias	Potrero Las Colonias	Unrelated	Unrelated	Unrelated	Unrelated	Unrelated	132977	37011
AR0503	AR0526	Potrero Las Colonias	Potrero Las Colonias	Unrelated	Unrelated	Unrelated	Unrelated	Unrelated	121691	33909
AR0503	AR0528	Potrero Las Colonias	Potrero Las Colonias	Unrelated	Unrelated	Unrelated	Unrelated	Unrelated	86469	24433
AR0504	AR0522	Potrero Las Colonias	Potrero Las Colonias	Second Degree	Second Degree	Second Degree	Second Degree	Second Degree	2486736	645937
AR0504	AR0505	Potrero Las Colonias	Potrero Las Colonias	Unrelated	Unrelated	Unrelated	Unrelated	Unrelated	4173459	1045020
AR0504	AR0506	Potrero Las Colonias	Potrero Las Colonias	Unrelated	Unrelated	Unrelated	Unrelated	Unrelated	2116384	553261
AR0504	AR0507	Potrero Las Colonias	Potrero Las Colonias	Unrelated	Unrelated	Unrelated	Unrelated	Unrelated	1894979	486515
AR0504	AR0508	Potrero Las Colonias	Potrero Las Colonias	Unrelated	Unrelated	Unrelated	Unrelated	Unrelated	2256613	582798
AR0504	AR0509	Potrero Las Colonias	Potrero Las Colonias	Unrelated	Unrelated	Unrelated	Unrelated	Unrelated	3359330	846390
AR0504	AR0510	Potrero Las Colonias	Potrero Las Colonias	Unrelated	Unrelated	Unrelated	Unrelated	Unrelated	3854407	956832
AR0504	AR0511	Potrero Las Colonias	Potrero Las Colonias	Unrelated	Unrelated	Unrelated	Unrelated	Unrelated	2514809	639963
AR0504	AR0512	Potrero Las Colonias	Potrero Las Colonias	Unrelated	Unrelated	Unrelated	Unrelated	Unrelated	4359715	1070822
AR0504	AR0514	Potrero Las Colonias	Potrero Las Colonias	Unrelated	Unrelated	Unrelated	Unrelated	Unrelated	2269925	584705
AR0504	AR0515	Potrero Las Colonias	Potrero Las Colonias	Unrelated	Unrelated	Unrelated	Unrelated	Unrelated	3679635	921252
AR0504	AR0516	Potrero Las Colonias	Potrero Las Colonias	Unrelated	Unrelated	Unrelated	Unrelated	Unrelated	3576259	895126
AR0504	AR0517	Potrero Las Colonias	Potrero Las Colonias	Unrelated	Unrelated	Unrelated	Unrelated	Unrelated	1278750	337311
AR0504	AR0518	Potrero Las Colonias	Potrero Las Colonias	Unrelated	Unrelated	Unrelated	Unrelated	Unrelated	3970928	981646
AR0504	AR0519	Potrero Las Colonias	Potrero Las Colonias	Unrelated	Unrelated	Unrelated	Unrelated	Unrelated	3912793	973746
AR0504	AR0520	Potrero Las Colonias	Potrero Las Colonias	Unrelated	Unrelated	Unrelated	Unrelated	Unrelated	1050169	264707
AR0504	AR0521	Potrero Las Colonias	Potrero Las Colonias	Unrelated	Unrelated	Unrelated	Unrelated	Unrelated	2748293	709491
AR0504	AR0523	Potrero Las Colonias	Potrero Las Colonias	Unrelated	Unrelated	Unrelated	Unrelated	Unrelated	3711025	935050
AR0504	AR0524	Potrero Las Colonias	Potrero Las Colonias	Unrelated	Unrelated	Unrelated	Unrelated	Unrelated	48910	13389
AR0504	AR0526	Potrero Las Colonias	Potrero Las Colonias	Unrelated	Unrelated	Unrelated	Unrelated	Unrelated	3384779	859474
AR0504	AR0527	Potrero Las Colonias	Potrero Las Colonias	Unrelated	Unrelated	Unrelated	Unrelated	Unrelated	2487449	647634
AR0504	AR0528	Potrero Las Colonias	Potrero Las Colonias	Unrelated	Unrelated	Unrelated	Unrelated	Unrelated	2360428	607714
AR0505	AR0507	Potrero Las Colonias	Potrero Las Colonias	Siblings	Siblings	Siblings	First Degree	First Degree	1879083	483680
AR0505	AR0511	Potrero Las Colonias	Potrero Las Colonias	Siblings	Siblings	Siblings	First Degree	First Degree	2489703	635361
AR0505	AR0515	Potrero Las Colonias	Potrero Las Colonias	Second Degree	Second Degree	Second Degree	Second Degree	Second Degree	3633884	914138
AR0505	AR0516	Potrero Las Colonias	Potrero Las Colonias	Second Degree - maybe Third Degree	Second Degree	Second Degree	Second Degree	Third Degree	3532622	888414
AR0505	AR0506	Potrero Las Colonias	Potrero Las Colonias	Unrelated	Unrelated	Unrelated	Unrelated	Unrelated	2095826	549950
AR0505	AR0508	Potrero Las Colonias	Potrero Las Colonias	Unrelated	Unrelated	Unrelated	Unrelated	Unrelated	2234458	579317
AR0505	AR0509	Potrero Las Colonias	Potrero Las Colonias	Unrelated	Unrelated	Unrelated	Unrelated	Unrelated	3318324	839959
AR0505	AR0510	Potrero Las Colonias	Potrero Las Colonias	Unrelated	Unrelated	Unrelated	Unrelated	Unrelated	3807948	949290
AR0505	AR0512	Potrero Las Colonias	Potrero Las Colonias	Unrelated	Unrelated	Unrelated	Unrelated	Unrelated	4308338	1062440
AR0505	AR0514	Potrero Las Colonias	Potrero Las Colonias	Unrelated	Unrelated	Unrelated	Unrelated	Unrelated	2241413	580915
AR0505	AR0517	Potrero Las Colonias	Potrero Las Colonias	Unrelated	Unrelated	Unrelated	Unrelated	Unrelated	1262749	334901
AR0505	AR0518	Potrero Las Colonias	Potrero Las Colonias	Unrelated	Unrelated	Unrelated	Unrelated	Unrelated	3921805	974022
AR0505	AR0519	Potrero Las Colonias	Potrero Las Colonias	Unrelated	Unrelated	Unrelated	Unrelated	Unrelated	3864895	966158
AR0505	AR0520	Potrero Las Colonias	Potrero Las Colonias	Unrelated	Unrelated	Unrelated	Unrelated	Unrelated	1035116	262593
AR0505	AR0521	Potrero Las Colonias	Potrero Las Colonias	Unrelated	Unrelated	Unrelated	Unrelated	Unrelated	2719393	704851
AR0505	AR0522	Potrero Las Colonias	Potrero Las Colonias	Unrelated	Unrelated	Unrelated	Unrelated	Unrelated	2457766	641464
AR0505	AR0523	Potrero Las Colonias	Potrero Las Colonias	Unrelated	Unrelated	Unrelated	Unrelated	Unrelated	3663381	927945
AR0505	AR0524	Potrero Las Colonias	Potrero Las Colonias	Unrelated	Unrelated	Unrelated	Unrelated	Unrelated	48670	13330
AR0505	AR0526	Potrero Las Colonias	Potrero Las Colonias	Unrelated	Unrelated	Unrelated	Unrelated	Unrelated	3344968	853180
AR0505	AR0527	Potrero Las Colonias	Potrero Las Colonias	Unrelated	Unrelated	Unrelated	Unrelated	Unrelated	2464940	643655
AR0505	AR0528	Potrero Las Colonias	Potrero Las Colonias	Unrelated	Unrelated	Unrelated	Unrelated	Unrelated	2338109	603809
AR0506	AR0507	Potrero Las Colonias	Potrero Las Colonias	Unrelated	Unrelated	Unrelated	Unrelated	Unrelated	966387	258654
AR0506	AR0508	Potrero Las Colonias	Potrero Las Colonias	Unrelated	Unrelated	Unrelated	Unrelated	Unrelated	1153968	310995
AR0506	AR0509	Potrero Las Colonias	Potrero Las Colonias	Unrelated	Unrelated	Unrelated	Unrelated	Unrelated	1696879	447320
AR0506	AR0510	Potrero Las Colonias	Potrero Las Colonias	Unrelated	Unrelated	Unrelated	Unrelated	Unrelated	1936072	504003
AR0506	AR0511	Potrero Las Colonias	Potrero Las Colonias	Unrelated	Unrelated	Unrelated	Unrelated	Unrelated	1277736	339511
AR0506	AR0512	Potrero Las Colonias	Potrero Las Colonias	Unrelated	Unrelated	Unrelated	Unrelated	Unrelated	2177859	561939
AR0506	AR0514	Potrero Las Colonias	Potrero Las Colonias	Unrelated	Unrelated	Unrelated	Unrelated	Unrelated	1155301	310780
AR0506	AR0515	Potrero Las Colonias	Potrero Las Colonias	Unrelated	Unrelated	Unrelated	Unrelated	Unrelated	1851640	485567
AR0506	AR0516	Potrero Las Colonias	Potrero Las Colonias	Unrelated	Unrelated	Unrelated	Unrelated	Unrelated	1800613	472348
AR0506	AR0517	Potrero Las Colonias	Potrero Las Colonias	Unrelated	Unrelated	Unrelated	Unrelated	Unrelated	653480	179701
AR0506	AR0518	Potrero Las Colonias	Potrero Las Colonias	Unrelated	Unrelated	Unrelated	Unrelated	Unrelated	1993015	516956
AR0506	AR0519	Potrero Las Colonias	Potrero Las Colonias	Unrelated	Unrelated	Unrelated	Unrelated	Unrelated	1966824	513223
AR0506	AR0520	Potrero Las Colonias	Potrero Las Colonias	Unrelated	Unrelated	Unrelated	Unrelated	Unrelated	529532	139788
AR0506	AR0521	Potrero Las Colonias	Potrero Las Colonias	Unrelated	Unrelated	Unrelated	Unrelated	Unrelated	1399772	376881
AR0506	AR0522	Potrero Las Colonias	Potrero Las Colonias	Unrelated	Unrelated	Unrelated	Unrelated	Unrelated	1269248	343903
AR0506	AR0523	Potrero Las Colonias	Potrero Las Colonias	Unrelated	Unrelated	Unrelated	Unrelated	Unrelated	1868426	492877
AR0506	AR0524	Potrero Las Colonias	Potrero Las Colonias	Unrelated	Unrelated	Unrelated	Unrelated	Unrelated	25536	7214
AR0506	AR0526	Potrero Las Colonias	Potrero Las Colonias	Unrelated	Unrelated	Unrelated	Unrelated	Unrelated	1711106	454282
AR0506	AR0527	Potrero Las Colonias	Potrero Las Colonias	Unrelated	Unrelated	Unrelated	Unrelated	Unrelated	1272855	345221
AR0506	AR0528	Potrero Las Colonias	Potrero Las Colonias	Unrelated	Unrelated	Unrelated	Unrelated	Unrelated	1206903	323998
AR0507	AR0510	Potrero Las Colonias	Potrero Las Colonias	Unrelated	Unrelated	Unrelated	Unrelated	Third Degree	1736295	443115
AR0507	AR0511	Potrero Las Colonias	Potrero Las Colonias	Siblings	Siblings	Siblings	First Degree	First Degree	1143575	298347
AR0507	AR0515	Potrero Las Colonias	Potrero Las Colonias	Second Degree	Second Degree	Second Degree	Second Degree	Second Degree	1660705	426858
AR0507	AR0516	Potrero Las Colonias	Potrero Las Colonias	Second Degree	Second Degree	Second Degree	Second Degree	Second Degree	1614038	415017
AR0507	AR0508	Potrero Las Colonias	Potrero Las Colonias	Unrelated	Unrelated	Unrelated	Unrelated	Unrelated	1028045	272338
AR0507	AR0509	Potrero Las Colonias	Potrero Las Colonias	Unrelated	Unrelated	Unrelated	Unrelated	Unrelated	1517822	392600
AR0507	AR0512	Potrero Las Colonias	Potrero Las Colonias	Unrelated	Unrelated	Unrelated	Unrelated	Unrelated	1953365	494327
AR0507	AR0514	Potrero Las Colonias	Potrero Las Colonias	Unrelated	Unrelated	Unrelated	Unrelated	Unrelated	1031152	272369
AR0507	AR0517	Potrero Las Colonias	Potrero Las Colonias	Unrelated	Unrelated	Unrelated	Unrelated	Unrelated	583543	157292
AR0507	AR0518	Potrero Las Colonias	Potrero Las Colonias	Unrelated	Unrelated	Unrelated	Unrelated	Unrelated	1787182	454400
AR0507	AR0519	Potrero Las Colonias	Potrero Las Colonias	Unrelated	Unrelated	Unrelated	Unrelated	Unrelated	1762862	451143
AR0507	AR0520	Potrero Las Colonias	Potrero Las Colonias	Unrelated	Unrelated	Unrelated	Unrelated	Unrelated	475280	122826
AR0507	AR0521	Potrero Las Colonias	Potrero Las Colonias	Unrelated	Unrelated	Unrelated	Unrelated	Unrelated	1249914	330883
AR0507	AR0522	Potrero Las Colonias	Potrero Las Colonias	Unrelated	Unrelated	Unrelated	Unrelated	Unrelated	1131304	301514
AR0507	AR0523	Potrero Las Colonias	Potrero Las Colonias	Unrelated	Unrelated	Unrelated	Unrelated	Unrelated	1674110	433238
AR0507	AR0524	Potrero Las Colonias	Potrero Las Colonias	Unrelated	Unrelated	Unrelated	Unrelated	Unrelated	22771	6402
AR0507	AR0526	Potrero Las Colonias	Potrero Las Colonias	Unrelated	Unrelated	Unrelated	Unrelated	Unrelated	1530273	398963
AR0507	AR0527	Potrero Las Colonias	Potrero Las Colonias	Unrelated	Unrelated	Unrelated	Unrelated	Unrelated	1134724	302885
AR0507	AR0528	Potrero Las Colonias	Potrero Las Colonias	Unrelated	Unrelated	Unrelated	Unrelated	Unrelated	1074937	283617
AR0508	AR0514	Potrero Las Colonias	Potrero Las Colonias	Third Degree	Third Degree	Unrelated	Third Degree	Third Degree	1228762	326793
AR0508	AR0518	Potrero Las Colonias	Potrero Las Colonias	Unrelated - maybe Third Degree	Unrelated	Unrelated	Third Degree	Third Degree	2128514	544670
AR0508	AR0519	Potrero Las Colonias	Potrero Las Colonias	Third Degree	Third Degree	Third Degree	Third Degree	Third Degree	2098259	540504
AR0508	AR0523	Potrero Las Colonias	Potrero Las Colonias	Third Degree - maybe Unrelated	Third Degree	Unrelated	Third Degree	Third Degree	1992721	519291
AR0508	AR0524	Potrero Las Colonias	Potrero Las Colonias	Third Degree	Third Degree	Third Degree	Third Degree	Unrelated/Consistent with Third Degree	26968	7595
AR0508	AR0509	Potrero Las Colonias	Potrero Las Colonias	Unrelated	Unrelated	Unrelated	Unrelated	Unrelated	1809753	471777
AR0508	AR0510	Potrero Las Colonias	Potrero Las Colonias	Unrelated	Unrelated	Unrelated	Unrelated	Unrelated	2067566	531104
AR0508	AR0511	Potrero Las Colonias	Potrero Las Colonias	Unrelated	Unrelated	Unrelated	Unrelated	Unrelated	1362411	357792
AR0508	AR0512	Potrero Las Colonias	Potrero Las Colonias	Unrelated	Unrelated	Unrelated	Unrelated	Unrelated	2324412	592157
AR0508	AR0515	Potrero Las Colonias	Potrero Las Colonias	Unrelated	Unrelated	Unrelated	Unrelated	Unrelated	1974988	511934
AR0508	AR0516	Potrero Las Colonias	Potrero Las Colonias	Unrelated	Unrelated	Unrelated	Unrelated	Unrelated	1920349	497486
AR0508	AR0517	Potrero Las Colonias	Potrero Las Colonias	Unrelated	Unrelated	Unrelated	Unrelated	Unrelated	694825	188493
AR0508	AR0520	Potrero Las Colonias	Potrero Las Colonias	Unrelated	Unrelated	Unrelated	Unrelated	Unrelated	564851	147575
AR0508	AR0521	Potrero Las Colonias	Potrero Las Colonias	Unrelated	Unrelated	Unrelated	Unrelated	Unrelated	1486335	395861
AR0508	AR0522	Potrero Las Colonias	Potrero Las Colonias	Unrelated	Unrelated	Unrelated	Unrelated	Unrelated	1346827	361350
AR0508	AR0526	Potrero Las Colonias	Potrero Las Colonias	Unrelated	Unrelated	Unrelated	Unrelated	Unrelated	1822472	477927
AR0508	AR0527	Potrero Las Colonias	Potrero Las Colonias	Unrelated	Unrelated	Unrelated	Unrelated	Unrelated	1352089	363096
AR0508	AR0528	Potrero Las Colonias	Potrero Las Colonias	Unrelated	Unrelated	Unrelated	Unrelated	Unrelated	1282622	340567
AR0509	AR0518	Potrero Las Colonias	Potrero Las Colonias	Third Degree	Third Degree	Third Degree	Second Degree	Second Degree	3175066	790663
AR0509	AR0510	Potrero Las Colonias	Potrero Las Colonias	Unrelated	Unrelated	Unrelated	Unrelated	Unrelated	3083128	770604
AR0509	AR0511	Potrero Las Colonias	Potrero Las Colonias	Unrelated	Unrelated	Unrelated	Unrelated	Unrelated	2015743	516742
AR0509	AR0512	Potrero Las Colonias	Potrero Las Colonias	Unrelated	Unrelated	Unrelated	Unrelated	Unrelated	3469649	860490
AR0509	AR0514	Potrero Las Colonias	Potrero Las Colonias	Unrelated	Unrelated	Unrelated	Unrelated	Unrelated	1816990	472217
AR0509	AR0515	Potrero Las Colonias	Potrero Las Colonias	Unrelated	Unrelated	Unrelated	Unrelated	Unrelated	2941212	741895
AR0509	AR0516	Potrero Las Colonias	Potrero Las Colonias	Unrelated	Unrelated	Unrelated	Unrelated	Unrelated	2858273	720736
AR0509	AR0517	Potrero Las Colonias	Potrero Las Colonias	Unrelated	Unrelated	Unrelated	Unrelated	Unrelated	1025979	272728
AR0509	AR0519	Potrero Las Colonias	Potrero Las Colonias	Unrelated	Unrelated	Unrelated	Unrelated	Unrelated	3125381	784014
AR0509	AR0520	Potrero Las Colonias	Potrero Las Colonias	Unrelated	Unrelated	Unrelated	Unrelated	Unrelated	841403	213646
AR0509	AR0521	Potrero Las Colonias	Potrero Las Colonias	Unrelated	Unrelated	Unrelated	Unrelated	Unrelated	2197521	572744
AR0509	AR0522	Potrero Las Colonias	Potrero Las Colonias	Unrelated	Unrelated	Unrelated	Unrelated	Unrelated	1989405	521694
AR0509	AR0523	Potrero Las Colonias	Potrero Las Colonias	Unrelated	Unrelated	Unrelated	Unrelated	Unrelated	2964016	753018
AR0509	AR0524	Potrero Las Colonias	Potrero Las Colonias	Unrelated	Unrelated	Unrelated	Unrelated	Unrelated	39132	10788
AR0509	AR0526	Potrero Las Colonias	Potrero Las Colonias	Unrelated	Unrelated	Unrelated	Unrelated	Unrelated	2705402	692700
AR0509	AR0527	Potrero Las Colonias	Potrero Las Colonias	Unrelated	Unrelated	Unrelated	Unrelated	Unrelated	1992213	523567
AR0509	AR0528	Potrero Las Colonias	Potrero Las Colonias	Unrelated	Unrelated	Unrelated	Unrelated	Unrelated	1892586	491378
AR0510	AR0515	Potrero Las Colonias	Potrero Las Colonias	Third Degree	Third Degree	Third Degree	Third Degree	Third Degree	3376009	838355
AR0510	AR0516	Potrero Las Colonias	Potrero Las Colonias	Third Degree	Third Degree	Third Degree	Third Degree	Third Degree	3282595	814515
AR0510	AR0524	Potrero Las Colonias	Potrero Las Colonias	Unrelated	Unrelated	Unrelated	Unrelated	Unrelated/Consistent with Third Degree	44549	12134
AR0510	AR0511	Potrero Las Colonias	Potrero Las Colonias	Unrelated	Unrelated	Unrelated	Unrelated	Unrelated	2306610	582498
AR0510	AR0512	Potrero Las Colonias	Potrero Las Colonias	Unrelated	Unrelated	Unrelated	Unrelated	Unrelated	3988786	973233
AR0510	AR0514	Potrero Las Colonias	Potrero Las Colonias	Unrelated	Unrelated	Unrelated	Unrelated	Unrelated	2078859	532503
AR0510	AR0517	Potrero Las Colonias	Potrero Las Colonias	Unrelated	Unrelated	Unrelated	Unrelated	Unrelated	1170897	307559
AR0510	AR0518	Potrero Las Colonias	Potrero Las Colonias	Unrelated	Unrelated	Unrelated	Unrelated	Unrelated	3646677	893205
AR0510	AR0519	Potrero Las Colonias	Potrero Las Colonias	Unrelated	Unrelated	Unrelated	Unrelated	Unrelated	3588965	885633
AR0510	AR0520	Potrero Las Colonias	Potrero Las Colonias	Unrelated	Unrelated	Unrelated	Unrelated	Unrelated	965093	241107
AR0510	AR0521	Potrero Las Colonias	Potrero Las Colonias	Unrelated	Unrelated	Unrelated	Unrelated	Unrelated	2513682	645575
AR0510	AR0522	Potrero Las Colonias	Potrero Las Colonias	Unrelated	Unrelated	Unrelated	Unrelated	Unrelated	2273256	588102
AR0510	AR0523	Potrero Las Colonias	Potrero Las Colonias	Unrelated	Unrelated	Unrelated	Unrelated	Unrelated	3400749	850723
AR0510	AR0526	Potrero Las Colonias	Potrero Las Colonias	Unrelated	Unrelated	Unrelated	Unrelated	Unrelated	3101065	782184
AR0510	AR0527	Potrero Las Colonias	Potrero Las Colonias	Unrelated	Unrelated	Unrelated	Unrelated	Unrelated	2276447	589659
AR0510	AR0528	Potrero Las Colonias	Potrero Las Colonias	Unrelated	Unrelated	Unrelated	Unrelated	Unrelated	2162028	553283
AR0511	AR0515	Potrero Las Colonias	Potrero Las Colonias	Second Degree	Second Degree	Second Degree	Second Degree	Second Degree	2204088	561581
AR0511	AR0516	Potrero Las Colonias	Potrero Las Colonias	Second Degree	Second Degree	Second Degree	Second Degree	Second Degree	2141876	545635
AR0511	AR0522	Potrero Las Colonias	Potrero Las Colonias	Unrelated - maybe Third Degree	Unrelated	Unrelated	Third Degree	Third Degree	1496437	395729
AR0511	AR0512	Potrero Las Colonias	Potrero Las Colonias	Unrelated	Unrelated	Unrelated	Unrelated	Unrelated	2593871	650127
AR0511	AR0514	Potrero Las Colonias	Potrero Las Colonias	Unrelated	Unrelated	Unrelated	Unrelated	Unrelated	1365215	357721
AR0511	AR0517	Potrero Las Colonias	Potrero Las Colonias	Unrelated	Unrelated	Unrelated	Unrelated	Unrelated	771955	206757
AR0511	AR0518	Potrero Las Colonias	Potrero Las Colonias	Unrelated	Unrelated	Unrelated	Unrelated	Unrelated	2375193	597752
AR0511	AR0519	Potrero Las Colonias	Potrero Las Colonias	Unrelated	Unrelated	Unrelated	Unrelated	Unrelated	2338988	592854
AR0511	AR0520	Potrero Las Colonias	Potrero Las Colonias	Unrelated	Unrelated	Unrelated	Unrelated	Unrelated	630844	161562
AR0511	AR0521	Potrero Las Colonias	Potrero Las Colonias	Unrelated	Unrelated	Unrelated	Unrelated	Unrelated	1652209	434060
AR0511	AR0523	Potrero Las Colonias	Potrero Las Colonias	Unrelated	Unrelated	Unrelated	Unrelated	Unrelated	2220633	569426
AR0511	AR0524	Potrero Las Colonias	Potrero Las Colonias	Unrelated	Unrelated	Unrelated	Unrelated	Unrelated	29718	8300
AR0511	AR0526	Potrero Las Colonias	Potrero Las Colonias	Unrelated	Unrelated	Unrelated	Unrelated	Unrelated	2031346	524462
AR0511	AR0527	Potrero Las Colonias	Potrero Las Colonias	Unrelated	Unrelated	Unrelated	Unrelated	Unrelated	1500248	397381
AR0511	AR0528	Potrero Las Colonias	Potrero Las Colonias	Unrelated	Unrelated	Unrelated	Unrelated	Unrelated	1423222	372850
AR0512	AR0514	Potrero Las Colonias	Potrero Las Colonias	Unrelated	Unrelated	Unrelated	Unrelated	Unrelated	2338604	594408
AR0512	AR0515	Potrero Las Colonias	Potrero Las Colonias	Unrelated	Unrelated	Unrelated	Unrelated	Unrelated	3802610	936874
AR0512	AR0516	Potrero Las Colonias	Potrero Las Colonias	Unrelated	Unrelated	Unrelated	Unrelated	Unrelated	3696451	910409
AR0512	AR0517	Potrero Las Colonias	Potrero Las Colonias	Unrelated	Unrelated	Unrelated	Unrelated	Unrelated	1315238	342512
AR0512	AR0518	Potrero Las Colonias	Potrero Las Colonias	Unrelated	Unrelated	Unrelated	Unrelated	Unrelated	4109632	998523
AR0512	AR0519	Potrero Las Colonias	Potrero Las Colonias	Unrelated	Unrelated	Unrelated	Unrelated	Unrelated	4045712	990324
AR0512	AR0520	Potrero Las Colonias	Potrero Las Colonias	Unrelated	Unrelated	Unrelated	Unrelated	Unrelated	1085367	269292
AR0512	AR0521	Potrero Las Colonias	Potrero Las Colonias	Unrelated	Unrelated	Unrelated	Unrelated	Unrelated	2831559	720923
AR0512	AR0522	Potrero Las Colonias	Potrero Las Colonias	Unrelated	Unrelated	Unrelated	Unrelated	Unrelated	2558128	656226
AR0512	AR0523	Potrero Las Colonias	Potrero Las Colonias	Unrelated	Unrelated	Unrelated	Unrelated	Unrelated	3832014	950905
AR0512	AR0524	Potrero Las Colonias	Potrero Las Colonias	Unrelated	Unrelated	Unrelated	Unrelated	Unrelated	50196	13585
AR0512	AR0526	Potrero Las Colonias	Potrero Las Colonias	Unrelated	Unrelated	Unrelated	Unrelated	Unrelated	3493211	873618
AR0512	AR0527	Potrero Las Colonias	Potrero Las Colonias	Unrelated	Unrelated	Unrelated	Unrelated	Unrelated	2561066	657839
AR0512	AR0528	Potrero Las Colonias	Potrero Las Colonias	Unrelated	Unrelated	Unrelated	Unrelated	Unrelated	2432457	617198
AR0514	AR0519	Potrero Las Colonias	Potrero Las Colonias	Unrelated - maybe Third Degree	Unrelated	Third Degree	Third Degree	Third Degree	2111733	542240
AR0514	AR0523	Potrero Las Colonias	Potrero Las Colonias	Third Degree	Third Degree	Third Degree	Third Degree	Third Degree	2008077	520724
AR0514	AR0524	Potrero Las Colonias	Potrero Las Colonias	Second Degree	Second Degree	Second Degree	Second Degree	Second Degree	27112	7581
AR0514	AR0515	Potrero Las Colonias	Potrero Las Colonias	Unrelated	Unrelated	Unrelated	Unrelated	Unrelated	1990702	513538
AR0514	AR0516	Potrero Las Colonias	Potrero Las Colonias	Unrelated	Unrelated	Unrelated	Unrelated	Unrelated	1934070	499260
AR0514	AR0517	Potrero Las Colonias	Potrero Las Colonias	Unrelated	Unrelated	Unrelated	Unrelated	Unrelated	700751	189303
AR0514	AR0518	Potrero Las Colonias	Potrero Las Colonias	Unrelated	Unrelated	Unrelated	Unrelated	Unrelated	2139533	546460
AR0514	AR0520	Potrero Las Colonias	Potrero Las Colonias	Unrelated	Unrelated	Unrelated	Unrelated	Unrelated	572161	148132
AR0514	AR0521	Potrero Las Colonias	Potrero Las Colonias	Unrelated	Unrelated	Unrelated	Unrelated	Unrelated	1493439	397281
AR0514	AR0522	Potrero Las Colonias	Potrero Las Colonias	Unrelated	Unrelated	Unrelated	Unrelated	Unrelated	1353542	361893
AR0514	AR0526	Potrero Las Colonias	Potrero Las Colonias	Unrelated	Unrelated	Unrelated	Unrelated	Unrelated	1831721	479006
AR0514	AR0527	Potrero Las Colonias	Potrero Las Colonias	Unrelated	Unrelated	Unrelated	Unrelated	Unrelated	1352859	362850
AR0514	AR0528	Potrero Las Colonias	Potrero Las Colonias	Unrelated	Unrelated	Unrelated	Unrelated	Unrelated	1284013	340738
AR0515	AR0516	Potrero Las Colonias	Potrero Las Colonias	Siblings	Siblings	Siblings	First Degree	First Degree	3136617	784723
AR0515	AR0517	Potrero Las Colonias	Potrero Las Colonias	Unrelated	Unrelated	Unrelated	Unrelated	Unrelated	1123276	296223
AR0515	AR0518	Potrero Las Colonias	Potrero Las Colonias	Unrelated	Unrelated	Unrelated	Unrelated	Unrelated	3475663	860279
AR0515	AR0519	Potrero Las Colonias	Potrero Las Colonias	Unrelated	Unrelated	Unrelated	Unrelated	Unrelated	3424517	853330
AR0515	AR0520	Potrero Las Colonias	Potrero Las Colonias	Unrelated	Unrelated	Unrelated	Unrelated	Unrelated	923749	232570
AR0515	AR0521	Potrero Las Colonias	Potrero Las Colonias	Unrelated	Unrelated	Unrelated	Unrelated	Unrelated	2403666	622136
AR0515	AR0522	Potrero Las Colonias	Potrero Las Colonias	Unrelated	Unrelated	Unrelated	Unrelated	Unrelated	2176744	567128
AR0515	AR0523	Potrero Las Colonias	Potrero Las Colonias	Unrelated	Unrelated	Unrelated	Unrelated	Unrelated	3250318	819484
AR0515	AR0524	Potrero Las Colonias	Potrero Las Colonias	Unrelated	Unrelated	Unrelated	Unrelated	Unrelated	42762	11834
AR0515	AR0526	Potrero Las Colonias	Potrero Las Colonias	Unrelated	Unrelated	Unrelated	Unrelated	Unrelated	2961591	753014
AR0515	AR0527	Potrero Las Colonias	Potrero Las Colonias	Unrelated	Unrelated	Unrelated	Unrelated	Unrelated	2174388	568109
AR0515	AR0528	Potrero Las Colonias	Potrero Las Colonias	Unrelated	Unrelated	Unrelated	Unrelated	Unrelated	2065426	533110
AR0516	AR0517	Potrero Las Colonias	Potrero Las Colonias	Unrelated	Unrelated	Unrelated	Unrelated	Unrelated	1090838	287920
AR0516	AR0518	Potrero Las Colonias	Potrero Las Colonias	Unrelated	Unrelated	Unrelated	Unrelated	Unrelated	3379583	835867
AR0516	AR0519	Potrero Las Colonias	Potrero Las Colonias	Unrelated	Unrelated	Unrelated	Unrelated	Unrelated	3329798	829203
AR0516	AR0520	Potrero Las Colonias	Potrero Las Colonias	Unrelated	Unrelated	Unrelated	Unrelated	Unrelated	897364	226128
AR0516	AR0521	Potrero Las Colonias	Potrero Las Colonias	Unrelated	Unrelated	Unrelated	Unrelated	Unrelated	2337677	604775
AR0516	AR0522	Potrero Las Colonias	Potrero Las Colonias	Unrelated	Unrelated	Unrelated	Unrelated	Unrelated	2114736	550903
AR0516	AR0523	Potrero Las Colonias	Potrero Las Colonias	Unrelated	Unrelated	Unrelated	Unrelated	Unrelated	3158183	796562
AR0516	AR0524	Potrero Las Colonias	Potrero Las Colonias	Unrelated	Unrelated	Unrelated	Unrelated	Unrelated	41845	11453
AR0516	AR0526	Potrero Las Colonias	Potrero Las Colonias	Unrelated	Unrelated	Unrelated	Unrelated	Unrelated	2877947	731483
AR0516	AR0527	Potrero Las Colonias	Potrero Las Colonias	Unrelated	Unrelated	Unrelated	Unrelated	Unrelated	2116248	552241
AR0516	AR0528	Potrero Las Colonias	Potrero Las Colonias	Unrelated	Unrelated	Unrelated	Unrelated	Unrelated	2008302	518236
AR0517	AR0518	Potrero Las Colonias	Potrero Las Colonias	Unrelated	Unrelated	Unrelated	Unrelated	Unrelated	1204788	315311
AR0517	AR0519	Potrero Las Colonias	Potrero Las Colonias	Unrelated	Unrelated	Unrelated	Unrelated	Unrelated	1189482	312689
AR0517	AR0520	Potrero Las Colonias	Potrero Las Colonias	Unrelated	Unrelated	Unrelated	Unrelated	Unrelated	323093	85396
AR0517	AR0521	Potrero Las Colonias	Potrero Las Colonias	Unrelated	Unrelated	Unrelated	Unrelated	Unrelated	844404	229055
AR0517	AR0522	Potrero Las Colonias	Potrero Las Colonias	Unrelated	Unrelated	Unrelated	Unrelated	Unrelated	767096	209371
AR0517	AR0523	Potrero Las Colonias	Potrero Las Colonias	Unrelated	Unrelated	Unrelated	Unrelated	Unrelated	1133325	300810
AR0517	AR0524	Potrero Las Colonias	Potrero Las Colonias	Unrelated	Unrelated	Unrelated	Unrelated	Unrelated	15318	4354
AR0517	AR0526	Potrero Las Colonias	Potrero Las Colonias	Unrelated	Unrelated	Unrelated	Unrelated	Unrelated	1034777	276544
AR0517	AR0527	Potrero Las Colonias	Potrero Las Colonias	Unrelated	Unrelated	Unrelated	Unrelated	Unrelated	765628	210068
AR0517	AR0528	Potrero Las Colonias	Potrero Las Colonias	Unrelated	Unrelated	Unrelated	Unrelated	Unrelated	725564	196397
AR0518	AR0519	Potrero Las Colonias	Potrero Las Colonias	Unrelated	Unrelated	Unrelated	Unrelated	Unrelated	3697224	908834
AR0518	AR0520	Potrero Las Colonias	Potrero Las Colonias	Unrelated	Unrelated	Unrelated	Unrelated	Unrelated	993782	247434
AR0518	AR0521	Potrero Las Colonias	Potrero Las Colonias	Unrelated	Unrelated	Unrelated	Unrelated	Unrelated	2588577	662399
AR0518	AR0522	Potrero Las Colonias	Potrero Las Colonias	Unrelated	Unrelated	Unrelated	Unrelated	Unrelated	2340614	603472
AR0518	AR0523	Potrero Las Colonias	Potrero Las Colonias	Unrelated	Unrelated	Unrelated	Unrelated	Unrelated	3502417	872705
AR0518	AR0524	Potrero Las Colonias	Potrero Las Colonias	Unrelated	Unrelated	Unrelated	Unrelated	Unrelated	45739	12460
AR0518	AR0526	Potrero Las Colonias	Potrero Las Colonias	Unrelated	Unrelated	Unrelated	Unrelated	Unrelated	3192326	802104
AR0518	AR0527	Potrero Las Colonias	Potrero Las Colonias	Unrelated	Unrelated	Unrelated	Unrelated	Unrelated	2343238	604959
AR0518	AR0528	Potrero Las Colonias	Potrero Las Colonias	Unrelated	Unrelated	Unrelated	Unrelated	Unrelated	2226821	568219
AR0519	AR0523	Potrero Las Colonias	Potrero Las Colonias	Second Degree	Second Degree	Second Degree	Second Degree	Second Degree	3453449	865848
AR0519	AR0524	Potrero Las Colonias	Potrero Las Colonias	Second Degree	Second Degree	Second Degree	Second Degree	Second Degree	45523	12458
AR0519	AR0520	Potrero Las Colonias	Potrero Las Colonias	Unrelated	Unrelated	Unrelated	Unrelated	Unrelated	979374	245340
AR0519	AR0521	Potrero Las Colonias	Potrero Las Colonias	Unrelated	Unrelated	Unrelated	Unrelated	Unrelated	2553706	657656
AR0519	AR0522	Potrero Las Colonias	Potrero Las Colonias	Unrelated	Unrelated	Unrelated	Unrelated	Unrelated	2309273	598613
AR0519	AR0526	Potrero Las Colonias	Potrero Las Colonias	Unrelated	Unrelated	Unrelated	Unrelated	Unrelated	3144841	795352
AR0519	AR0527	Potrero Las Colonias	Potrero Las Colonias	Unrelated	Unrelated	Unrelated	Unrelated	Unrelated	2310957	600334
AR0519	AR0528	Potrero Las Colonias	Potrero Las Colonias	Unrelated	Unrelated	Unrelated	Unrelated	Unrelated	2195133	563212
AR0520	AR0521	Potrero Las Colonias	Potrero Las Colonias	Unrelated	Unrelated	Unrelated	Unrelated	Unrelated	688010	178912
AR0520	AR0522	Potrero Las Colonias	Potrero Las Colonias	Unrelated	Unrelated	Unrelated	Unrelated	Unrelated	623740	163455
AR0520	AR0523	Potrero Las Colonias	Potrero Las Colonias	Unrelated	Unrelated	Unrelated	Unrelated	Unrelated	930601	235897
AR0520	AR0524	Potrero Las Colonias	Potrero Las Colonias	Unrelated	Unrelated	Unrelated	Unrelated	Unrelated	12274	3473
AR0520	AR0526	Potrero Las Colonias	Potrero Las Colonias	Unrelated	Unrelated	Unrelated	Unrelated	Unrelated	847323	216560
AR0520	AR0527	Potrero Las Colonias	Potrero Las Colonias	Unrelated	Unrelated	Unrelated	Unrelated	Unrelated	621445	163076
AR0520	AR0528	Potrero Las Colonias	Potrero Las Colonias	Unrelated	Unrelated	Unrelated	Unrelated	Unrelated	591165	153592
AR0521	AR0522	Potrero Las Colonias	Potrero Las Colonias	Third Degree - maybe Unrelated	Third Degree	Third Degree	Third Degree	Third Degree	1638477	439053
AR0521	AR0523	Potrero Las Colonias	Potrero Las Colonias	Unrelated	Unrelated	Unrelated	Unrelated	Unrelated	2426513	631880
AR0521	AR0524	Potrero Las Colonias	Potrero Las Colonias	Unrelated	Unrelated	Unrelated	Unrelated	Unrelated	32699	9164
AR0521	AR0526	Potrero Las Colonias	Potrero Las Colonias	Unrelated	Unrelated	Unrelated	Unrelated	Unrelated	2215781	581088
AR0521	AR0527	Potrero Las Colonias	Potrero Las Colonias	Unrelated	Unrelated	Unrelated	Unrelated	Unrelated	1642172	440326
AR0521	AR0528	Potrero Las Colonias	Potrero Las Colonias	Unrelated	Unrelated	Unrelated	Unrelated	Unrelated	1556699	412785
AR0522	AR0528	Potrero Las Colonias	Potrero Las Colonias	Unrelated	Unrelated	Unrelated	Unrelated	Third Degree	1410336	377186
AR0522	AR0523	Potrero Las Colonias	Potrero Las Colonias	Unrelated	Unrelated	Unrelated	Unrelated	Unrelated	2195891	575291
AR0522	AR0524	Potrero Las Colonias	Potrero Las Colonias	Unrelated	Unrelated	Unrelated	Unrelated	Unrelated	29735	8410
AR0522	AR0526	Potrero Las Colonias	Potrero Las Colonias	Unrelated	Unrelated	Unrelated	Unrelated	Unrelated	2005886	529129
AR0522	AR0527	Potrero Las Colonias	Potrero Las Colonias	Unrelated	Unrelated	Unrelated	Unrelated	Unrelated	1485704	401361
AR0523	AR0524	Potrero Las Colonias	Potrero Las Colonias	Second Degree	Second Degree	Second Degree	Second Degree	Second Degree	43201	11918
AR0523	AR0526	Potrero Las Colonias	Potrero Las Colonias	Unrelated	Unrelated	Unrelated	Unrelated	Unrelated	2985423	764223
AR0523	AR0527	Potrero Las Colonias	Potrero Las Colonias	Unrelated	Unrelated	Unrelated	Unrelated	Unrelated	2194700	576587
AR0523	AR0528	Potrero Las Colonias	Potrero Las Colonias	Unrelated	Unrelated	Unrelated	Unrelated	Unrelated	2082916	541115
AR0524	AR0526	Potrero Las Colonias	Potrero Las Colonias	Unrelated	Unrelated	Unrelated	Unrelated	Unrelated	39610	11054
AR0524	AR0527	Potrero Las Colonias	Potrero Las Colonias	Unrelated	Unrelated	Unrelated	Unrelated	Unrelated	29944	8410
AR0524	AR0528	Potrero Las Colonias	Potrero Las Colonias	Unrelated	Unrelated	Unrelated	Unrelated	Unrelated	28234	8010
AR0526	AR0527	Potrero Las Colonias	Potrero Las Colonias	Unrelated	Unrelated	Unrelated	Unrelated	Unrelated	2009956	531724
AR0526	AR0528	Potrero Las Colonias	Potrero Las Colonias	Unrelated	Unrelated	Unrelated	Unrelated	Unrelated	1905681	498236
AR0527	AR0528	Potrero Las Colonias	Potrero Las Colonias	Unrelated	Unrelated	Unrelated	Unrelated	Unrelated	1415257	378702
