# Supplementary material for: Local agricultural transition, crisis and migration in the Southern Andes
Source: Research Square preprint supplement (doi:10.21203/rs.3.rs-6450570/v1), 2025-05-05
Supplement: Supplementary file 7 [file dfef67a6164133a111dab9c6.xlsx]

## Sheet: A. F3(Ind1,Ind2; Mbuti)
Outgroup	Source1	Source2	MajorGroup1	Group1	Color1	Point1	MajorGroup2	Group2	Color2	Point2	f_3.1240K	stderr.1240K	Z.1240K	SNPs.1240K	f_3.1240K.TVs	stderr.1240K.TVs	Z.1240K.TVs	SNPs.1240K.TVs	f_3.1240K.SG	stderr.1240K.SG	Z.1240K.SG	SNPs.1240K.SG	f_3.SG.TVs	stderr.SG.TVs	Z.SG.TVs	SNPs.SG.TVs
Mbuti	2417J	F9	CentralAmerica_LH	Mexico_SierraGorda_Postclassic.SG	darkviolet	3	SouthernNorthAmerica_LH	Mexico_SierraTarahumara_PostClassic.SG	blueviolet	3	359328	3411	105344	382279	359001	4985	72017	74485	385472	4003	96298	1820669	385672	426	90533	565039
Mbuti	2417J	AR0514	CentralAmerica_LH	Mexico_SierraGorda_Postclassic.SG	darkviolet	3	Uspallata	LH-MF|LH-F	goldenrod1	21	364713	3521	103.58	325025	367881	4956	74232	63434	389732	406	95983	1397560	39145	4344	90122	439339
Mbuti	2417J	AR0500and513	CentralAmerica_LH	Mexico_SierraGorda_Postclassic.SG	darkviolet	3	Uspallata	LH-MF|LH-F	goldenrod1	21	364297	3523	103396	275469	366573	5155	71116	53669	388017	3923	98898	1204317	390187	4187	93198	376932
Mbuti	2417J	AR0501	CentralAmerica_LH	Mexico_SierraGorda_Postclassic.SG	darkviolet	3	Uspallata	LH-MF|LH-F	goldenrod1	21	366708	3868	94816	159557	370164	6497	56971	30783	39419	4079	96.64	677132	395717	446	88731	210748
Mbuti	2417J	AR0508	CentralAmerica_LH	Mexico_SierraGorda_Postclassic.SG	darkviolet	3	Uspallata	LH-MF|LH-F	goldenrod1	21	366913	3541	103609	323590	367325	5093	72121	62773	390779	4076	95864	1396294	392497	4328	90687	434739
Mbuti	2417J	AR0527	CentralAmerica_LH	Mexico_SierraGorda_Postclassic.SG	darkviolet	3	Uspallata	LH-MF|LH-F	goldenrod1	21	365853	3516	104044	359001	368905	4859	75919	69972	390336	4061	96124	1538211	392801	436	90.1	479606
Mbuti	2417J	AR0519	CentralAmerica_LH	Mexico_SierraGorda_Postclassic.SG	darkviolet	3	Uspallata	LH-MF|LH-F	goldenrod1	21	367609	3396	108263	540351	369164	4504	81969	106065	390747	4049	96.51	2426846	392223	4215	93061	762516
Mbuti	2417J	AR0526	CentralAmerica_LH	Mexico_SierraGorda_Postclassic.SG	darkviolet	3	Uspallata	LH-MF|LH-F	goldenrod1	21	359728	3409	105508	477042	365797	455	80395	93318	384895	394	97685	2092868	386334	4101	94205	657319
Mbuti	2417J	AR0520	CentralAmerica_LH	Mexico_SierraGorda_Postclassic.SG	darkviolet	3	Uspallata	LH-LFplc|LH-F	darkorange	22	362005	4128	87.69	147313	367949	6714	54805	29026	387643	4139	93.66	650940	388979	4513	86199	206131
Mbuti	2417J	AR0149	CentralAmerica_LH	Mexico_SierraGorda_Postclassic.SG	darkviolet	3	Uspallata	LH-HG|LH-HG	darkorange4	23	366987	4458	82314	117679	NA	NA	NA	NA	389776	4304	90558	561577	387908	478	81144	177511
Mbuti	2417J	AR0509	CentralAmerica_LH	Mexico_SierraGorda_Postclassic.SG	darkviolet	3	Uspallata	LH-MF|LH-F	goldenrod1	21	366798	3493	105005	470195	373767	4715	79279	91813	39259	413	95059	2082077	396164	441	89.83	652949
Mbuti	2417J	AR0512	CentralAmerica_LH	Mexico_SierraGorda_Postclassic.SG	darkviolet	3	Uspallata	LH-MF|LH-F	goldenrod1	21	364909	3394	107513	594436	364817	4424	82455	116681	389002	4034	96433	2697219	390632	4175	93572	847430
Mbuti	2417J	AR0506	CentralAmerica_LH	Mexico_SierraGorda_Postclassic.SG	darkviolet	3	Uspallata	LH-MF|LH-F	goldenrod1	21	365857	358	102187	307130	372615	5226	71296	59511	391504	3815	102632	1305057	394	4029	97.78	405544
Mbuti	2417J	AR0510	CentralAmerica_LH	Mexico_SierraGorda_Postclassic.SG	darkviolet	3	Uspallata	LH-MF|LH-F	goldenrod1	21	366598	335	109427	531101	372148	4392	84725	104148	389299	4	97321	2398784	390115	4076	95709	753952
Mbuti	2417J	2417Q	CentralAmerica_LH	Mexico_SierraGorda_Postclassic.SG	darkviolet	3	CentralAmerica_LH	Mexico_SierraGorda_Terminalclassic.SG	darkviolet	4	383783	3541	108382	592270	388407	4625	83987	116499	409127	4355	93936	2847019	409637	4446	92142	891863
Mbuti	2417J	AR0151	CentralAmerica_LH	Mexico_SierraGorda_Postclassic.SG	darkviolet	3	Uspallata	LH-HG|LH-HG	darkorange4	23	368344	3805	96.81	194207	365548	5817	62841	38749	388966	4239	91768	927932	384344	4467	86.04	296098
Mbuti	2417J	E8CdV	CentralAmerica_LH	Mexico_SierraGorda_Postclassic.SG	darkviolet	3	CentralAmerica_LH	Mexico_CanadaDeLaVirgen_MidClassic.SG	darkviolet	2	369754	4056	91.17	157319	372426	6658	55939	30606	397091	422	94101	870958	3951	4468	88427	267140
Mbuti	2417J	AR0152	CentralAmerica_LH	Mexico_SierraGorda_Postclassic.SG	darkviolet	3	Uspallata	LH-HG|LH-HG	darkorange4	23	36494	4705	77565	76192	NA	NA	NA	NA	393079	4322	90958	361878	393692	5078	77535	115386
Mbuti	2417J	AR0180	CentralAmerica_LH	Mexico_SierraGorda_Postclassic.SG	darkviolet	3	Uspallata	LH-LF|LH-F	darkorange4	22	359613	514	69964	56773	NA	NA	NA	NA	394863	4587	86081	265371	393662	5484	71787	84376
Mbuti	2417J	AR0521	CentralAmerica_LH	Mexico_SierraGorda_Postclassic.SG	darkviolet	3	Uspallata	LH-MF|LH-F	goldenrod1	21	366925	3462	105981	393462	374862	487	76974	76789	390704	3857	101292	1696979	392935	415	94674	530498
Mbuti	2417J	333B	CentralAmerica_LH	Mexico_SierraGorda_Postclassic.SG	darkviolet	3	CentralAmerica_LH	Mexico_SierraGorda_Postclassic.SG	darkviolet	3	399274	3888	102685	503573	403369	5002	80646	98135	425505	4731	89934	2364765	42672	4909	86.92	736697
Mbuti	2417J	AR0517	CentralAmerica_LH	Mexico_SierraGorda_Postclassic.SG	darkviolet	3	Uspallata	LH-MFout|LH-F	goldenrod1	23	366272	3541	103438	187286	373372	587	63602	36462	389311	3994	97469	784090	390913	4405	88743	246827
Mbuti	2417J	AR0162	CentralAmerica_LH	Mexico_SierraGorda_Postclassic.SG	darkviolet	3	Uspallata	LH-LF|LH-F	darkorange4	21	36763	3585	102.56	394169	370003	4964	74532	77400	393411	3931	100.07	1692828	395873	416	95159	532908
Mbuti	2417J	AR0505	CentralAmerica_LH	Mexico_SierraGorda_Postclassic.SG	darkviolet	3	Uspallata	LH-MF|LH-F	goldenrod1	21	365514	3428	106635	580006	371815	4614	80578	113506	389914	4179	93302	2577337	39375	4461	88271	805175
Mbuti	2417J	AR0528	CentralAmerica_LH	Mexico_SierraGorda_Postclassic.SG	darkviolet	3	Uspallata	LH-MF|LH-F	goldenrod1	21	363126	3547	102364	336978	365248	5104	71564	65774	388965	3958	98271	1461532	39206	4243	92392	454694
Mbuti	2417J	AR0518	CentralAmerica_LH	Mexico_SierraGorda_Postclassic.SG	darkviolet	3	Uspallata	LH-MF|LH-F	goldenrod1	21	367263	3472	105768	544771	368229	446	82556	107025	3915	4052	96.63	2468850	392561	4151	94.57	775789
Mbuti	2417J	AR0504	CentralAmerica_LH	Mexico_SierraGorda_Postclassic.SG	darkviolet	3	Uspallata	LH-MF|LH-F	goldenrod1	21	364496	3367	108269	584406	369815	4503	82125	114376	388602	3958	98174	2600701	3908	4112	95037	815720
Mbuti	2417Q	AR0151	CentralAmerica_LH	Mexico_SierraGorda_Terminalclassic.SG	darkviolet	4	Uspallata	LH-HG|LH-HG	darkorange4	23	367921	3747	98184	271825	370887	545	68052	54606	395358	438	90268	1343270	392258	4639	84551	429295
Mbuti	2417Q	AR0180	CentralAmerica_LH	Mexico_SierraGorda_Terminalclassic.SG	darkviolet	4	Uspallata	LH-LF|LH-F	darkorange4	22	369675	4974	74.32	79215	NA	NA	NA	NA	398181	4853	82046	381555	397171	5502	72185	121754
Mbuti	2417Q	AR0519	CentralAmerica_LH	Mexico_SierraGorda_Terminalclassic.SG	darkviolet	4	Uspallata	LH-MF|LH-F	goldenrod1	21	372967	347	107479	757925	374517	4324	86607	149563	396355	4233	93638	3508884	39701	4386	90522	1105831
Mbuti	2417Q	AR0504	CentralAmerica_LH	Mexico_SierraGorda_Terminalclassic.SG	darkviolet	4	Uspallata	LH-MF|LH-F	goldenrod1	21	367058	345	106396	820330	373329	4355	85716	161386	392687	4081	96224	3759729	394652	4233	93234	1182356
Mbuti	2417Q	AR0527	CentralAmerica_LH	Mexico_SierraGorda_Terminalclassic.SG	darkviolet	4	Uspallata	LH-MF|LH-F	goldenrod1	21	367554	3578	102724	502384	368403	4669	78905	98315	393562	4252	92562	2211558	395497	4492	88045	691122
Mbuti	2417Q	AR0149	CentralAmerica_LH	Mexico_SierraGorda_Terminalclassic.SG	darkviolet	4	Uspallata	LH-HG|LH-HG	darkorange4	23	370025	4272	86608	164788	NA	NA	NA	NA	391913	4444	88181	812269	39166	4692	83474	257315
Mbuti	2417Q	AR0508	CentralAmerica_LH	Mexico_SierraGorda_Terminalclassic.SG	darkviolet	4	Uspallata	LH-MF|LH-F	goldenrod1	21	368282	367	100359	452708	372284	4857	76652	88166	393839	4254	92584	2008347	394109	4454	88478	627345
Mbuti	2417Q	AR0517	CentralAmerica_LH	Mexico_SierraGorda_Terminalclassic.SG	darkviolet	4	Uspallata	LH-MFout|LH-F	goldenrod1	23	368702	369	99918	262232	378851	5485	69073	51318	393003	44	89324	1126520	393681	4672	84257	355856
Mbuti	2417Q	AR0518	CentralAmerica_LH	Mexico_SierraGorda_Terminalclassic.SG	darkviolet	4	Uspallata	LH-MF|LH-F	goldenrod1	21	371546	3517	105634	764326	375176	4348	86289	150675	396636	4161	95.33	3573053	396779	4294	92402	1125646
Mbuti	2417Q	AR0526	CentralAmerica_LH	Mexico_SierraGorda_Terminalclassic.SG	darkviolet	4	Uspallata	LH-MF|LH-F	goldenrod1	21	369686	3564	103717	668751	378522	4536	83448	131451	397996	4204	94681	3018713	399924	4309	92804	950881
Mbuti	2417Q	AR0501	CentralAmerica_LH	Mexico_SierraGorda_Terminalclassic.SG	darkviolet	4	Uspallata	LH-MF|LH-F	goldenrod1	21	37479	3952	94841	223404	38299	5932	64568	43292	400517	4232	94642	973940	403204	4529	89018	304139
Mbuti	2417Q	AR0500and513	CentralAmerica_LH	Mexico_SierraGorda_Terminalclassic.SG	darkviolet	4	Uspallata	LH-MF|LH-F	goldenrod1	21	369852	3611	102432	385266	372706	4954	75228	75610	394318	411	95952	1732987	395137	4351	90805	543633
Mbuti	2417Q	AR0510	CentralAmerica_LH	Mexico_SierraGorda_Terminalclassic.SG	darkviolet	4	Uspallata	LH-MF|LH-F	goldenrod1	21	367729	3524	104357	745305	372177	4353	85499	146944	393226	4298	91484	3470484	393892	4435	88.82	1094136
Mbuti	2417Q	AR0506	CentralAmerica_LH	Mexico_SierraGorda_Terminalclassic.SG	darkviolet	4	Uspallata	LH-MF|LH-F	goldenrod1	21	371597	3544	104866	429419	371886	493	75432	83625	39639	4124	96108	1876475	398359	4379	90975	584522
Mbuti	2417Q	AR0514	CentralAmerica_LH	Mexico_SierraGorda_Terminalclassic.SG	darkviolet	4	Uspallata	LH-MF|LH-F	goldenrod1	21	368317	3585	102738	454776	373095	4686	79614	89197	395454	4337	91173	2011717	397671	4594	86565	633945
Mbuti	2417Q	AR0152	CentralAmerica_LH	Mexico_SierraGorda_Terminalclassic.SG	darkviolet	4	Uspallata	LH-HG|LH-HG	darkorange4	23	372259	4401	84.59	106682	NA	NA	NA	NA	396963	4333	91611	524813	396386	485	81725	167843
Mbuti	2417Q	AR0505	CentralAmerica_LH	Mexico_SierraGorda_Terminalclassic.SG	darkviolet	4	Uspallata	LH-MF|LH-F	goldenrod1	21	368234	3493	105422	813472	375287	4414	85018	159940	394912	4318	91463	3721274	397774	4491	88566	1164821
Mbuti	2417Q	AR0509	CentralAmerica_LH	Mexico_SierraGorda_Terminalclassic.SG	darkviolet	4	Uspallata	LH-MF|LH-F	goldenrod1	21	368218	3517	104.69	658489	375629	4443	84544	129358	394337	4223	93372	3006576	397456	439	90.53	945615
Mbuti	2417Q	F9	CentralAmerica_LH	Mexico_SierraGorda_Terminalclassic.SG	darkviolet	4	SouthernNorthAmerica_LH	Mexico_SierraTarahumara_PostClassic.SG	blueviolet	3	366181	3473	105447	530320	366621	4546	80645	103952	39016	4191	93097	2603434	390459	4399	88751	808923
Mbuti	2417Q	AR0162	CentralAmerica_LH	Mexico_SierraGorda_Terminalclassic.SG	darkviolet	4	Uspallata	LH-LF|LH-F	darkorange4	21	369426	3538	104431	552384	373437	4564	81822	108828	394741	4076	96843	2440304	395389	4232	93437	770231
Mbuti	2417Q	AR0520	CentralAmerica_LH	Mexico_SierraGorda_Terminalclassic.SG	darkviolet	4	Uspallata	LH-LFplc|LH-F	darkorange	22	369471	3992	92545	205981	378005	6053	62453	40695	391793	4309	90923	937512	393076	4576	85893	297428
Mbuti	2417Q	E8CdV	CentralAmerica_LH	Mexico_SierraGorda_Terminalclassic.SG	darkviolet	4	CentralAmerica_LH	Mexico_CanadaDeLaVirgen_MidClassic.SG	darkviolet	2	369607	393	94057	216995	375233	6193	60591	42284	396006	4347	91094	1238735	39511	4504	87726	380102
Mbuti	2417Q	AR0512	CentralAmerica_LH	Mexico_SierraGorda_Terminalclassic.SG	darkviolet	4	Uspallata	LH-MF|LH-F	goldenrod1	21	3717	3455	107598	834466	375187	4216	89001	164647	397293	4243	93633	3904506	399483	4402	90744	1229973
Mbuti	2417Q	AR0528	CentralAmerica_LH	Mexico_SierraGorda_Terminalclassic.SG	darkviolet	4	Uspallata	LH-MF|LH-F	goldenrod1	21	366906	3593	102104	471138	370555	4725	78432	92216	393358	4269	92149	2101680	393774	4469	88119	655748
Mbuti	2417Q	333B	CentralAmerica_LH	Mexico_SierraGorda_Terminalclassic.SG	darkviolet	4	CentralAmerica_LH	Mexico_SierraGorda_Postclassic.SG	darkviolet	3	379385	3583	105892	703835	385437	4496	85.73	137963	405903	4258	95318	3414242	406678	4385	92744	1065900
Mbuti	2417Q	AR0521	CentralAmerica_LH	Mexico_SierraGorda_Terminalclassic.SG	darkviolet	4	Uspallata	LH-MF|LH-F	goldenrod1	21	368636	3413	108025	551400	37633	4571	82337	108109	393871	4065	96898	2443099	395789	4161	95125	766156
Mbuti	333B	AR0514	CentralAmerica_LH	Mexico_SierraGorda_Postclassic.SG	darkviolet	3	Uspallata	LH-MF|LH-F	goldenrod1	21	364767	3431	106302	386369	37057	4785	77445	75262	392139	4139	94751	1677738	392948	4313	91101	525874
Mbuti	333B	AR0518	CentralAmerica_LH	Mexico_SierraGorda_Postclassic.SG	darkviolet	3	Uspallata	LH-MF|LH-F	goldenrod1	21	370421	3414	108498	647619	374692	4293	87288	126735	395734	4134	95719	2966845	395483	434	91129	929378
Mbuti	333B	AR0528	CentralAmerica_LH	Mexico_SierraGorda_Postclassic.SG	darkviolet	3	Uspallata	LH-MF|LH-F	goldenrod1	21	364464	3484	104.61	400477	369031	4704	78454	77742	391006	4014	97408	1756997	3917	4292	91264	544914
Mbuti	333B	AR0508	CentralAmerica_LH	Mexico_SierraGorda_Postclassic.SG	darkviolet	3	Uspallata	LH-MF|LH-F	goldenrod1	21	367834	3411	107844	384372	37198	4894	76008	74290	394987	4084	96709	1677545	39831	4351	91.55	520897
Mbuti	333B	AR0517	CentralAmerica_LH	Mexico_SierraGorda_Postclassic.SG	darkviolet	3	Uspallata	LH-MFout|LH-F	goldenrod1	23	36484	3631	100487	222437	3727	5446	68438	43174	39102	4022	97216	940890	392715	4273	91897	295587
Mbuti	333B	AR0526	CentralAmerica_LH	Mexico_SierraGorda_Postclassic.SG	darkviolet	3	Uspallata	LH-MF|LH-F	goldenrod1	21	365851	3447	106128	566998	371618	4519	82243	110406	39234	4082	96114	2514017	393921	426	92479	787518
Mbuti	333B	F9	CentralAmerica_LH	Mexico_SierraGorda_Postclassic.SG	darkviolet	3	SouthernNorthAmerica_LH	Mexico_SierraTarahumara_PostClassic.SG	blueviolet	3	361549	3588	100773	452382	366788	4899	74873	88064	386608	4165	92819	2174248	387307	4367	88.68	671998
Mbuti	333B	AR0527	CentralAmerica_LH	Mexico_SierraGorda_Postclassic.SG	darkviolet	3	Uspallata	LH-MF|LH-F	goldenrod1	21	367287	3343	109851	427164	369272	4446	83058	82893	394368	4043	97552	1850832	395079	4247	93.02	575215
Mbuti	333B	AR0501	CentralAmerica_LH	Mexico_SierraGorda_Postclassic.SG	darkviolet	3	Uspallata	LH-MF|LH-F	goldenrod1	21	370627	3987	92967	190160	379071	6255	60607	36545	393911	4193	93954	815031	399245	459	86989	252885
Mbuti	333B	AR0180	CentralAmerica_LH	Mexico_SierraGorda_Postclassic.SG	darkviolet	3	Uspallata	LH-LF|LH-F	darkorange4	22	359451	5133	70034	66979	NA	NA	NA	NA	397582	4669	85154	315676	399754	5441	73468	100152
Mbuti	333B	AR0149	CentralAmerica_LH	Mexico_SierraGorda_Postclassic.SG	darkviolet	3	Uspallata	LH-HG|LH-HG	darkorange4	23	370006	4268	86.7	139382	NA	NA	NA	NA	392258	4359	89995	669248	392917	4857	80896	210978
Mbuti	333B	AR0500and513	CentralAmerica_LH	Mexico_SierraGorda_Postclassic.SG	darkviolet	3	Uspallata	LH-MF|LH-F	goldenrod1	21	366868	3624	101237	327355	372772	4869	76.56	63638	392245	4038	97127	1446292	394671	4307	91632	451072
Mbuti	333B	AR0512	CentralAmerica_LH	Mexico_SierraGorda_Postclassic.SG	darkviolet	3	Uspallata	LH-MF|LH-F	goldenrod1	21	368481	329	111989	706514	373331	4223	88411	138265	394739	4071	96965	3243820	39606	423	93633	1016306
Mbuti	333B	AR0505	CentralAmerica_LH	Mexico_SierraGorda_Postclassic.SG	darkviolet	3	Uspallata	LH-MF|LH-F	goldenrod1	21	365321	3306	110487	689779	370454	4237	87.44	134552	392934	4042	97206	3100913	395277	4277	92426	965562
Mbuti	333B	E8CdV	CentralAmerica_LH	Mexico_SierraGorda_Postclassic.SG	darkviolet	3	CentralAmerica_LH	Mexico_CanadaDeLaVirgen_MidClassic.SG	darkviolet	2	369022	401	92.02	185566	370944	622	59638	35879	394549	4164	94753	1038261	392041	4423	88631	317466
Mbuti	333B	AR0509	CentralAmerica_LH	Mexico_SierraGorda_Postclassic.SG	darkviolet	3	Uspallata	LH-MF|LH-F	goldenrod1	21	366077	3375	108474	558307	371238	4416	84067	108580	391103	4092	95578	2500969	393499	4292	91.68	781742
Mbuti	333B	AR0151	CentralAmerica_LH	Mexico_SierraGorda_Postclassic.SG	darkviolet	3	Uspallata	LH-HG|LH-HG	darkorange4	23	366726	3768	97325	228452	370699	5822	63677	45437	392418	4291	91457	1104139	387724	4522	85749	351000
Mbuti	333B	AR0504	CentralAmerica_LH	Mexico_SierraGorda_Postclassic.SG	darkviolet	3	Uspallata	LH-MF|LH-F	goldenrod1	21	364422	3451	105602	694720	371058	4455	83293	135472	389935	4027	96841	3128096	392082	4162	94216	978246
Mbuti	333B	AR0521	CentralAmerica_LH	Mexico_SierraGorda_Postclassic.SG	darkviolet	3	Uspallata	LH-MF|LH-F	goldenrod1	21	366844	3485	105267	468473	375637	4774	78692	91098	393501	3968	99175	2041036	39685	4254	93298	636713
Mbuti	333B	AR0162	CentralAmerica_LH	Mexico_SierraGorda_Postclassic.SG	darkviolet	3	Uspallata	LH-LF|LH-F	darkorange4	21	368884	3595	102.6	468587	373627	4804	77775	91515	394855	4105	96196	2035382	397181	4277	92856	638501
Mbuti	333B	AR0520	CentralAmerica_LH	Mexico_SierraGorda_Postclassic.SG	darkviolet	3	Uspallata	LH-LFplc|LH-F	darkorange	22	367305	4008	91632	174823	374804	6193	60522	34381	392772	4099	95821	778928	395428	4516	87561	245969
Mbuti	333B	AR0506	CentralAmerica_LH	Mexico_SierraGorda_Postclassic.SG	darkviolet	3	Uspallata	LH-MF|LH-F	goldenrod1	21	366132	3459	105846	365209	371567	4889	75999	70484	393712	3941	99897	1570028	395421	4173	94761	486365
Mbuti	333B	AR0510	CentralAmerica_LH	Mexico_SierraGorda_Postclassic.SG	darkviolet	3	Uspallata	LH-MF|LH-F	goldenrod1	21	366286	3443	106374	631032	370988	4377	84762	123339	390647	4057	96289	2881761	390428	4236	92163	903477
Mbuti	333B	AR0152	CentralAmerica_LH	Mexico_SierraGorda_Postclassic.SG	darkviolet	3	Uspallata	LH-HG|LH-HG	darkorange4	23	368503	4445	82.9	90046	NA	NA	NA	NA	39439	4262	92546	432103	396824	4895	81068	137170
Mbuti	333B	AR0519	CentralAmerica_LH	Mexico_SierraGorda_Postclassic.SG	darkviolet	3	Uspallata	LH-MF|LH-F	goldenrod1	21	371909	34	109398	642226	376451	4287	87816	125677	397368	4132	96169	2917536	398535	4298	92735	913931
Mbuti	A460	KCA-1364	SouthPatagonia_MH	Chile_WesternArchipelago_Ayayema_5100BP.SG	blue3	23	CentralAndes_LateHorizon_LH	Peru_Kusicancha1_LH.Capt	darkorange2	8	371133	3431	108174	602980	372647	4437	83.99	117133	NA	NA	NA	NA	NA	NA	NA	NA
Mbuti	A460	QKI-9-3	SouthPatagonia_MH	Chile_WesternArchipelago_Ayayema_5100BP.SG	blue3	23	CentralAndes_LateHorizon_LH	Peru_Qotakalli1_LH.Capt	darkorange2	10	369228	3702	99748	414847	366945	4824	76066	79475	NA	NA	NA	NA	NA	NA	NA	NA
Mbuti	A460	Cuncaicha15-04	SouthPatagonia_MH	Chile_WesternArchipelago_Ayayema_5100BP.SG	blue3	23	CentralAndes_MH	Peru_Cuncaicha_3300BP_contam.Capt	orange4	25	364379	3623	100578	593533	365907	4553	80358	114162	NA	NA	NA	NA	NA	NA	NA	NA
Mbuti	A460	I12362	SouthPatagonia_MH	Chile_WesternArchipelago_Ayayema_5100BP.SG	blue3	23	SouthPatagonia_MH	Argentina_NorthTierradelFuego_LaArcillosa2_5800BP.Capt	blue3	21	406381	3753	108279	547853	408259	4547	89787	104239	NA	NA	NA	NA	NA	NA	NA	NA
Mbuti	A460	I2230	SouthPatagonia_MH	Chile_WesternArchipelago_Ayayema_5100BP.SG	blue3	23	Pampa_MH	Argentina_ArroyoSeco2_7700BP.Capt	lightblue	22	378742	3774	100367	585823	381992	4529	84352	113504	NA	NA	NA	NA	NA	NA	NA	NA
Mbuti	A460	I0041	SouthPatagonia_MH	Chile_WesternArchipelago_Ayayema_5100BP.SG	blue3	23	CentralAndes_EH	Peru_Lauricocha_8600BP.Capt	darkorange4	22	367684	3822	96201	401613	366501	5007	73197	77576	NA	NA	NA	NA	NA	NA	NA	NA
Mbuti	A460	I12361	SouthPatagonia_MH	Chile_WesternArchipelago_Ayayema_5100BP.SG	blue3	23	SouthPatagonia_LH	Argentina_MitrePeninsula_Haush_400BP.Capt	blue1	3	387122	4787	80877	89940	NA	NA	NA	NA	NA	NA	NA	NA	NA	NA	NA	NA
Mbuti	A460	I0964	SouthPatagonia_MH	Chile_WesternArchipelago_Ayayema_5100BP.SG	blue3	23	CentralAndes_LateIntermediate_LH	Peru_Lima_LIP_650BP.Capt	orange1	6	371276	4938	75183	62913	NA	NA	NA	NA	NA	NA	NA	NA	NA	NA	NA	NA
Mbuti	A460	I11967	SouthPatagonia_MH	Chile_WesternArchipelago_Ayayema_5100BP.SG	blue3	23	California_NorthernChannelIslands_LH	USA_CA_SantaRosa_300BP.Capt	violet	4	362891	3501	103641	606003	363719	4554	79.87	116638	NA	NA	NA	NA	NA	NA	NA	NA
Mbuti	A460	OTT-1174	SouthPatagonia_MH	Chile_WesternArchipelago_Ayayema_5100BP.SG	blue3	23	CentralAndes_LateIntermediate_LH	Peru_Ollantaytambo_LIP.Capt	orange1	13	369023	3608	102279	458241	367878	4713	78.06	88390	NA	NA	NA	NA	NA	NA	NA	NA
Mbuti	A460	I3443	SouthPatagonia_MH	Chile_WesternArchipelago_Ayayema_5100BP.SG	blue3	23	CentralAmerica_EH	Belize_9400BP.Capt	mediumvioletred	21	37616	3918	96017	282490	375659	5564	67511	54192	NA	NA	NA	NA	NA	NA	NA	NA
Mbuti	A460	I11969	SouthPatagonia_MH	Chile_WesternArchipelago_Ayayema_5100BP.SG	blue3	23	California_NorthernChannelIslands_LH	USA_CA_SantaRosa_3200BP.Capt	violet	5	364356	3632	100328	624093	36559	446	81965	119924	NA	NA	NA	NA	NA	NA	NA	NA
Mbuti	A460	I2711	SouthPatagonia_MH	Chile_WesternArchipelago_Ayayema_5100BP.SG	blue3	23	California_NorthernChannelIslands_MH	USA_CA_SantaRosa_7400BP.Capt	violet	21	36706	384	95583	380229	365395	4969	73533	71752	NA	NA	NA	NA	NA	NA	NA	NA
Mbuti	A460	QKI-809	SouthPatagonia_MH	Chile_WesternArchipelago_Ayayema_5100BP.SG	blue3	23	CentralAndes_LateHorizon_LH	Peru_Qotakalli1_LH.Capt	darkorange2	10	366507	3537	103624	604919	368798	4425	83344	117637	NA	NA	NA	NA	NA	NA	NA	NA
Mbuti	A460	SN-44	SouthPatagonia_MH	Chile_WesternArchipelago_Ayayema_5100BP.SG	blue3	23	California_SouthernChannelIslands_MH	USA_CA_SanNicolas_4800BP.SG	violet	23	366149	3673	99699	826922	369454	4384	84.28	163634	391238	4426	88.4	3805434	392542	4557	86145	1211782
Mbuti	A460	I14826	SouthPatagonia_MH	Chile_WesternArchipelago_Ayayema_5100BP.SG	blue3	23	California_SouthernMainland_LH	USA_CA_Malibu_3400BP.Capt	palevioletred3	3	361273	4224	85529	135787	NA	NA	NA	NA	NA	NA	NA	NA	NA	NA	NA	NA
Mbuti	A460	SHN-492	SouthPatagonia_MH	Chile_WesternArchipelago_Ayayema_5100BP.SG	blue3	23	CentralAndes_LateHorizon_LH	Peru_Sacsahuaman3_LH.Capt	darkorange2	14	371472	3588	103526	446340	376915	4701	80174	85721	NA	NA	NA	NA	NA	NA	NA	NA
Mbuti	A460	I5456	SouthPatagonia_MH	Chile_WesternArchipelago_Ayayema_5100BP.SG	blue3	23	CentralAmerica_MH	Belize_7400BP.Capt	mediumvioletred	24	362555	3923	92429	311149	366542	5185	70699	58995	NA	NA	NA	NA	NA	NA	NA	NA
Mbuti	A460	KCA-1108	SouthPatagonia_MH	Chile_WesternArchipelago_Ayayema_5100BP.SG	blue3	23	CentralAndes_LateHorizon_LH	Peru_Kusicancha1_LH.Capt	darkorange2	8	371159	3544	104726	576989	373724	4485	83331	111166	NA	NA	NA	NA	NA	NA	NA	NA
Mbuti	A460	I11296	SouthPatagonia_MH	Chile_WesternArchipelago_Ayayema_5100BP.SG	blue3	23	California_SouthernMainland_LH	USA_CA_Goleta_2600BP.Capt	palevioletred3	7	363894	3551	102484	565201	362571	4497	80621	108145	NA	NA	NA	NA	NA	NA	NA	NA
Mbuti	A460	MIS6	SouthPatagonia_MH	Chile_WesternArchipelago_Ayayema_5100BP.SG	blue3	23	CentralAndes_MiddleHorizon_LH	Bolivia_MiraFlores_MH.Capt	orange2	4	361504	4535	79707	73301	NA	NA	NA	NA	NA	NA	NA	NA	NA	NA	NA	NA
Mbuti	A460	I2708	SouthPatagonia_MH	Chile_WesternArchipelago_Ayayema_5100BP.SG	blue3	23	California_NorthernChannelIslands_LH	USA_CA_SantaRosa_3000BP.Capt	violet	3	365064	4374	83471	122990	NA	NA	NA	NA	NA	NA	NA	NA	NA	NA	NA	NA
Mbuti	A460	I2236	SouthPatagonia_MH	Chile_WesternArchipelago_Ayayema_5100BP.SG	blue3	23	CentralAndes_LateIntermediate_LH	Peru_Chanka_LIP.Capt	orange1	4	369474	4159	88827	141309	NA	NA	NA	NA	NA	NA	NA	NA	NA	NA	NA	NA
Mbuti	A460	SHN-902	SouthPatagonia_MH	Chile_WesternArchipelago_Ayayema_5100BP.SG	blue3	23	CentralAndes_LateHorizon_LH	Peru_Sacsahuaman2_LH.Capt	darkorange2	13	369976	3916	94478	225421	376718	5848	64417	43031	NA	NA	NA	NA	NA	NA	NA	NA
Mbuti	A460	I0750	SouthPatagonia_MH	Chile_WesternArchipelago_Ayayema_5100BP.SG	blue3	23	California_SouthernChannelIslands_LH	USA_CA_SanClemente_500BP.Capt	violet	9	359502	3593	100056	479309	360681	4628	77934	93025	NA	NA	NA	NA	NA	NA	NA	NA
Mbuti	A460	CR-01	SouthPatagonia_MH	Chile_WesternArchipelago_Ayayema_5100BP.SG	blue3	23	California_NorthernChannelIslands_LH	USA_CA_SantaCruz_1000BP.SG	violet	2	363122	3498	103818	820261	366114	4299	85154	162238	387527	4201	92239	3781590	389065	4306	90349	1203735
Mbuti	A460	I11558	SouthPatagonia_MH	Chile_WesternArchipelago_Ayayema_5100BP.SG	blue3	23	California_NorthernChannelIslands_MH	USA_CA_SantaRosa_7400BP.Capt	violet	21	363778	3692	98523	617291	365116	4691	77.84	119041	NA	NA	NA	NA	NA	NA	NA	NA
Mbuti	A460	I2705	SouthPatagonia_MH	Chile_WesternArchipelago_Ayayema_5100BP.SG	blue3	23	California_NorthernChannelIslands_LH	USA_CA_SantaRosa_300BP.Capt	violet	4	364369	3464	105183	511280	363813	4466	81459	96622	NA	NA	NA	NA	NA	NA	NA	NA
Mbuti	A460	I12941	SouthPatagonia_MH	Chile_WesternArchipelago_Ayayema_5100BP.SG	blue3	23	SouthPatagonia_LH	Argentina_BeagleChannel_Yamana_100BP.Capt	blue1	1	395444	3792	104286	617093	396696	4539	87.4	118530	NA	NA	NA	NA	NA	NA	NA	NA
Mbuti	A460	AR0527	SouthPatagonia_MH	Chile_WesternArchipelago_Ayayema_5100BP.SG	blue3	23	Uspallata	LH-MF|LH-F	goldenrod1	21	369109	3504	105348	515264	368668	4512	81.7	100965	397477	4159	95575	2282168	398769	4332	92056	715348
Mbuti	A460	I12355	SouthPatagonia_MH	Chile_WesternArchipelago_Ayayema_5100BP.SG	blue3	23	SouthPatagonia_LH	Argentina_BeagleChannel_Yamana_1500BP.Capt	blue1	2	392343	3906	100456	464715	394572	4921	80186	87927	NA	NA	NA	NA	NA	NA	NA	NA
Mbuti	A460	B-03	SouthPatagonia_MH	Chile_WesternArchipelago_Ayayema_5100BP.SG	blue3	23	California_Baja_LH	Mexico_Pericues_Unknown.SG	palevioletred1	4	357373	3762	94992	199183	359877	5578	64512	39116	384422	4228	90917	870822	388678	4632	83915	275568
Mbuti	A460	AR0506	SouthPatagonia_MH	Chile_WesternArchipelago_Ayayema_5100BP.SG	blue3	23	Uspallata	LH-MF|LH-F	goldenrod1	21	371191	3503	105976	440082	373216	4532	82351	85835	396961	4083	97222	1936936	398225	4241	93.89	605372
Mbuti	A460	Yaghan890	SouthPatagonia_MH	Chile_WesternArchipelago_Ayayema_5100BP.SG	blue3	23	SouthPatagonia_LH	Argentina_BeagleChannel_Yamana_100BP.SG	blue1	1	385495	4563	84485	140899	NA	NA	NA	NA	422207	4389	96192	770651	431503	4827	89.39	221726
Mbuti	A460	I0042	SouthPatagonia_MH	Chile_WesternArchipelago_Ayayema_5100BP.SG	blue3	23	CentralAndes_LateIntermediate_LH	Peru_LIP_Botigiriayocc_600BP.Capt	orange1	7	368829	3488	105753	783011	370286	435	85124	153147	NA	NA	NA	NA	NA	NA	NA	NA
Mbuti	A460	I17109	SouthPatagonia_MH	Chile_WesternArchipelago_Ayayema_5100BP.SG	blue3	23	SouthernNorthAmerica_LH	Mexico_Tayopa_1000BP.Capt	blueviolet	5	35805	4891	73205	76505	NA	NA	NA	NA	NA	NA	NA	NA	NA	NA	NA	NA
Mbuti	A460	SN-17	SouthPatagonia_MH	Chile_WesternArchipelago_Ayayema_5100BP.SG	blue3	23	California_SouthernChannelIslands_MH	USA_CA_SanNicolas_4800BP.SG	violet	23	361965	3704	97733	754827	367313	444	82732	149730	387405	4426	87524	3422410	388988	4594	84671	1096350
Mbuti	A460	Lovelock4	SouthPatagonia_MH	Chile_WesternArchipelago_Ayayema_5100BP.SG	blue3	23	SouthernNorthAmerica_LH	USA_Nevada_LovelockCave_1850BP.SG	blueviolet	1	362429	3905	92814	345052	358767	526	68204	67865	38712	4331	89393	1571801	386261	4492	85991	496420
Mbuti	A460	SN-11	SouthPatagonia_MH	Chile_WesternArchipelago_Ayayema_5100BP.SG	blue3	23	California_SouthernChannelIslands_LH	USA_CA_SanNicolas_1600BP.SG	violet	8	359496	3443	104412	729749	36387	4341	83825	144248	384936	4161	92512	3323024	386612	4358	88723	1061982
Mbuti	A460	Ala1	SouthPatagonia_MH	Chile_WesternArchipelago_Ayayema_5100BP.SG	blue3	23	California_Central_LH	USA_CA_SanFranciscoBay_300BP.SG	palevioletred1	5	361329	3791	95321	276151	37232	5675	65608	55522	382443	4127	92658	1313017	383575	4339	88404	425923
Mbuti	A460	AR0149	SouthPatagonia_MH	Chile_WesternArchipelago_Ayayema_5100BP.SG	blue3	23	Uspallata	LH-HG|LH-HG	darkorange4	23	369047	4223	87398	169617	NA	NA	NA	NA	392625	4353	90.2	836443	389483	4774	81588	266664
Mbuti	A460	OTT-1187	SouthPatagonia_MH	Chile_WesternArchipelago_Ayayema_5100BP.SG	blue3	23	CentralAndes_LateIntermediate_LH	Peru_Ollantaytambo_LIP.Capt	orange1	13	364939	3577	102011	623678	3657	441	82933	121238	NA	NA	NA	NA	NA	NA	NA	NA
Mbuti	A460	MIS7	SouthPatagonia_MH	Chile_WesternArchipelago_Ayayema_5100BP.SG	blue3	23	CentralAndes_MiddleHorizon_LH	Bolivia_MiraFlores_MH.Capt	orange2	4	368609	3588	102739	512785	368394	4616	79802	98922	NA	NA	NA	NA	NA	NA	NA	NA
Mbuti	A460	SN-10	SouthPatagonia_MH	Chile_WesternArchipelago_Ayayema_5100BP.SG	blue3	23	California_SouthernChannelIslands_LH	USA_CA_SanNicolas_1600BP.SG	violet	8	358899	4003	89667	188335	NA	NA	NA	NA	387298	4296	90145	791108	389226	4693	82939	247858
Mbuti	A460	AR0180	SouthPatagonia_MH	Chile_WesternArchipelago_Ayayema_5100BP.SG	blue3	23	Uspallata	LH-LF|LH-F	darkorange4	22	372623	4819	77324	81391	NA	NA	NA	NA	398911	4776	83517	395537	399721	528	75702	126861
Mbuti	A460	AR0501	SouthPatagonia_MH	Chile_WesternArchipelago_Ayayema_5100BP.SG	blue3	23	Uspallata	LH-MF|LH-F	goldenrod1	21	373953	3932	95.1	229019	381586	5823	65529	44429	39992	429	93221	1007059	40151	4547	88309	315679
Mbuti	A460	I17114	SouthPatagonia_MH	Chile_WesternArchipelago_Ayayema_5100BP.SG	blue3	23	SouthernNorthAmerica_LH	Mexico_Tayopa_1000BP.Capt	blueviolet	5	353477	4664	75793	73648	NA	NA	NA	NA	NA	NA	NA	NA	NA	NA	NA	NA
Mbuti	A460	F9	SouthPatagonia_MH	Chile_WesternArchipelago_Ayayema_5100BP.SG	blue3	23	SouthernNorthAmerica_LH	Mexico_SierraTarahumara_PostClassic.SG	blueviolet	3	356976	3438	103833	542873	361055	4457	81003	106573	382289	4118	92834	2655754	382599	432	88.56	828574
Mbuti	A460	SN-03	SouthPatagonia_MH	Chile_WesternArchipelago_Ayayema_5100BP.SG	blue3	23	California_SouthernChannelIslands_LH	USA_CA_SanNicolas_1600BP.SG	violet	8	368244	4074	90388	178649	NA	NA	NA	NA	391162	4374	89419	787656	3906	4641	84171	254079
Mbuti	A460	SN-15	SouthPatagonia_MH	Chile_WesternArchipelago_Ayayema_5100BP.SG	blue3	23	California_SouthernChannelIslands_LH	USA_CA_SanNicolas_1600BP.SG	violet	8	361922	431	83966	146651	NA	NA	NA	NA	386629	4618	83714	658410	388156	5045	76943	211642
Mbuti	A460	I2261	SouthPatagonia_MH	Chile_WesternArchipelago_Ayayema_5100BP.SG	blue3	23	CentralAndes_MH	Peru_LaGalgada_4100BP.Capt	orange4	22	368372	3443	106.98	684809	366101	4309	84968	133002	NA	NA	NA	NA	NA	NA	NA	NA
Mbuti	A460	LAR001	SouthPatagonia_MH	Chile_WesternArchipelago_Ayayema_5100BP.SG	blue3	23	Brazil_MH	Brazil_Laranjal_6600BP.Capt	palegreen4	22	364471	3607	101032	290246	36234	536	67595	55766	NA	NA	NA	NA	NA	NA	NA	NA
Mbuti	A460	I2264	SouthPatagonia_MH	Chile_WesternArchipelago_Ayayema_5100BP.SG	blue3	23	CentralAndes_LateIntermediate_LH	Peru_Highlands_LIP_Chimu.Capt	orange1	5	373632	3569	104686	518545	374076	462	80964	99554	NA	NA	NA	NA	NA	NA	NA	NA
Mbuti	A460	Enoque65	SouthPatagonia_MH	Chile_WesternArchipelago_Ayayema_5100BP.SG	blue3	23	Brazil_MH	Brazil_Enoque_3500BP.SG	palegreen4	21	NA	NA	NA	NA	NA	NA	NA	NA	385559	5102	75571	133874	NA	NA	NA	NA
Mbuti	A460	I1867	SouthPatagonia_MH	Chile_WesternArchipelago_Ayayema_5100BP.SG	blue3	23	SouthernNorthAmerica_LH	Mexico_SanLorenzo_700BP.Capt	blueviolet	6	336337	4859	69213	63163	NA	NA	NA	NA	NA	NA	NA	NA	NA	NA	NA	NA
Mbuti	A460	I2703	SouthPatagonia_MH	Chile_WesternArchipelago_Ayayema_5100BP.SG	blue3	23	California_NorthernChannelIslands_LH	USA_CA_SantaRosa_300BP.Capt	violet	4	366668	3447	106374	578210	36591	4394	83273	110557	NA	NA	NA	NA	NA	NA	NA	NA
Mbuti	A460	SHN-355	SouthPatagonia_MH	Chile_WesternArchipelago_Ayayema_5100BP.SG	blue3	23	CentralAndes_LateHorizon_LH	Peru_Sacsahuaman2_LH.Capt	darkorange2	13	371325	3615	102705	548402	370869	4548	81.55	106694	NA	NA	NA	NA	NA	NA	NA	NA
Mbuti	A460	I1753	SouthPatagonia_MH	Chile_WesternArchipelago_Ayayema_5100BP.SG	blue3	23	CentralChile_MH	Chile_LosRieles_5100BP.Capt	brown1	23	379375	361	105082	568514	383004	447	85674	109054	NA	NA	NA	NA	NA	NA	NA	NA
Mbuti	A460	I0965	SouthPatagonia_MH	Chile_WesternArchipelago_Ayayema_5100BP.SG	blue3	23	CentralAndes_LateIntermediate_LH	Peru_Lima_LIP_650BP.Capt	orange1	6	371614	4299	86444	116008	NA	NA	NA	NA	NA	NA	NA	NA	NA	NA	NA	NA
Mbuti	A460	Lapa22	SouthPatagonia_MH	Chile_WesternArchipelago_Ayayema_5100BP.SG	blue3	23	Brazil_EH	Brazil_LapaDoSanto_9600BP.Capt	palegreen1	21	367805	3857	95352	313450	373573	5258	71051	58867	NA	NA	NA	NA	NA	NA	NA	NA
Mbuti	A460	I0308	SouthPatagonia_MH	Chile_WesternArchipelago_Ayayema_5100BP.SG	blue3	23	Pampa_MH	Argentina_ArroyoSeco2_7700BP.Capt	lightblue	22	372711	3871	96277	308983	370813	5395	68738	59016	NA	NA	NA	NA	NA	NA	NA	NA
Mbuti	A460	I15173	SouthPatagonia_MH	Chile_WesternArchipelago_Ayayema_5100BP.SG	blue3	23	California_Central_LH	USA_CA_CalaverasCounty_600BP.Capt	palevioletred1	7	369118	3826	96485	498963	375713	478	78594	95869	NA	NA	NA	NA	NA	NA	NA	NA
Mbuti	A460	PS-17	SouthPatagonia_MH	Chile_WesternArchipelago_Ayayema_5100BP.SG	blue3	23	California_SouthernMainland_LH	USA_CA_PointSal_1500BP.SG	palevioletred3	2	NA	NA	NA	NA	NA	NA	NA	NA	386585	5041	76681	151751	386767	654	59138	48606
Mbuti	A460	KCA-3089	SouthPatagonia_MH	Chile_WesternArchipelago_Ayayema_5100BP.SG	blue3	23	CentralAndes_LateHorizon_LH	Peru_Kusicancha2_LH.Capt	darkorange2	9	367293	3522	104283	563187	367642	4364	84248	108834	NA	NA	NA	NA	NA	NA	NA	NA
Mbuti	A460	PS-07	SouthPatagonia_MH	Chile_WesternArchipelago_Ayayema_5100BP.SG	blue3	23	California_SouthernMainland_LH	USA_CA_PointSal_1500BP.SG	palevioletred3	2	370346	4105	90216	171691	NA	NA	NA	NA	398078	4457	89322	696464	399516	4791	83385	216213
Mbuti	A460	I2704	SouthPatagonia_MH	Chile_WesternArchipelago_Ayayema_5100BP.SG	blue3	23	California_NorthernChannelIslands_LH	USA_CA_SantaRosa_300BP.Capt	violet	4	361144	3691	97.84	548733	360969	452	79868	103873	NA	NA	NA	NA	NA	NA	NA	NA
Mbuti	A460	I2538	SouthPatagonia_MH	Chile_WesternArchipelago_Ayayema_5100BP.SG	blue3	23	CentralAndes_MiddleHorizon_LH	Chile_CaletaHuelen_MH_1100BP.Capt	orange2	5	373277	4465	83599	106241	NA	NA	NA	NA	NA	NA	NA	NA	NA	NA	NA	NA
Mbuti	A460	I2706	SouthPatagonia_MH	Chile_WesternArchipelago_Ayayema_5100BP.SG	blue3	23	California_NorthernChannelIslands_LH	USA_CA_SantaRosa_300BP.Capt	violet	4	365916	3921	93.31	212082	365174	5945	61429	39525	NA	NA	NA	NA	NA	NA	NA	NA
Mbuti	A460	MX-01	SouthPatagonia_MH	Chile_WesternArchipelago_Ayayema_5100BP.SG	blue3	23	California_Baja_LH	Mexico_Baja_IronSprings_Unknown.SG	palevioletred1	2	362158	491	73755	71025	NA	NA	NA	NA	390086	4576	85238	312567	39216	5549	70671	100460
Mbuti	A460	I3564	SouthPatagonia_MH	Chile_WesternArchipelago_Ayayema_5100BP.SG	blue3	23	California_NorthernChannelIslands_LH	USA_CA_SantaRosa_3000BP.Capt	violet	3	36653	3567	102756	584069	365376	4383	83362	111338	NA	NA	NA	NA	NA	NA	NA	NA
Mbuti	A460	NC	SouthPatagonia_MH	Chile_WesternArchipelago_Ayayema_5100BP.SG	blue3	23	California_SouthernMainland_LH	USA_CA_NewCuyama_1300BP.SG	palevioletred3	1	362919	3702	98024	338075	361054	5008	72099	66256	389784	4262	91463	1459670	390828	4463	87571	455447
Mbuti	A460	I2709	SouthPatagonia_MH	Chile_WesternArchipelago_Ayayema_5100BP.SG	blue3	23	California_NorthernChannelIslands_MH	USA_CA_SantaRosa_4900BP.Capt	violet	22	366079	3959	92457	228448	369393	607	60.86	42516	NA	NA	NA	NA	NA	NA	NA	NA
Mbuti	A460	2417Q	SouthPatagonia_MH	Chile_WesternArchipelago_Ayayema_5100BP.SG	blue3	23	CentralAmerica_LH	Mexico_SierraGorda_Terminalclassic.SG	darkviolet	4	365845	3557	102853	852961	369922	4177	88562	168999	390462	4258	91711	4213215	390581	4353	89717	1328532
Mbuti	A460	I12942	SouthPatagonia_MH	Chile_WesternArchipelago_Ayayema_5100BP.SG	blue3	23	SouthPatagonia_LH	Argentina_BeagleChannel_Yamana_100BP.Capt	blue1	1	397808	4075	97628	208077	400815	6207	64576	39515	NA	NA	NA	NA	NA	NA	NA	NA
Mbuti	A460	Lapa05	SouthPatagonia_MH	Chile_WesternArchipelago_Ayayema_5100BP.SG	blue3	23	Brazil_EH	Brazil_LapaDoSanto_9600BP.Capt	palegreen1	21	354711	4345	81635	101769	NA	NA	NA	NA	NA	NA	NA	NA	NA	NA	NA	NA
Mbuti	A460	Lapa15	SouthPatagonia_MH	Chile_WesternArchipelago_Ayayema_5100BP.SG	blue3	23	Brazil_EH	Brazil_LapaDoSanto_9600BP.Capt	palegreen1	21	359495	3594	100019	433367	362763	4946	73352	81926	NA	NA	NA	NA	NA	NA	NA	NA
Mbuti	A460	I7086	SouthPatagonia_MH	Chile_WesternArchipelago_Ayayema_5100BP.SG	blue3	23	Pampa_MH	Argentina_ArroyoSeco2_7700BP.Capt	lightblue	22	366771	4817	76143	73237	NA	NA	NA	NA	NA	NA	NA	NA	NA	NA	NA	NA
Mbuti	A460	I2558	SouthPatagonia_MH	Chile_WesternArchipelago_Ayayema_5100BP.SG	blue3	23	CentralAndes_EarlyIntermediate_LH	Peru_Ullujaya_EIP_1350BP.Capt	darkorange1	5	372063	4019	92574	210330	373917	5891	63473	39345	NA	NA	NA	NA	NA	NA	NA	NA
Mbuti	A460	I0751	SouthPatagonia_MH	Chile_WesternArchipelago_Ayayema_5100BP.SG	blue3	23	California_SouthernChannelIslands_LH	USA_CA_SanClemente_500BP.Capt	violet	9	36125	3603	100266	668255	367146	4414	83169	129884	NA	NA	NA	NA	NA	NA	NA	NA
Mbuti	A460	SC-06	SouthPatagonia_MH	Chile_WesternArchipelago_Ayayema_5100BP.SG	blue3	23	California_SouthernChannelIslands_LH	USA_CA_SanClemente_900BP.SG	violet	7	3682	437	84261	127285	NA	NA	NA	NA	393289	4466	88066	544412	394675	495	79733	171878
Mbuti	A460	PS-03	SouthPatagonia_MH	Chile_WesternArchipelago_Ayayema_5100BP.SG	blue3	23	California_SouthernMainland_LH	USA_CA_PointSal_1500BP.SG	palevioletred3	2	362845	4929	73622	78586	NA	NA	NA	NA	390954	4787	81675	337966	392463	5395	72742	107497
Mbuti	A460	SJArg-3	SouthPatagonia_MH	Chile_WesternArchipelago_Ayayema_5100BP.SG	blue3	23	Cuyo_LH	Argentina_Callingasta_1500BP.SG	brown3	1	372821	5607	66493	45707	NA	NA	NA	NA	397023	4937	80422	196087	396741	5907	67.17	61586
Mbuti	A460	Sumidouro4	SouthPatagonia_MH	Chile_WesternArchipelago_Ayayema_5100BP.SG	blue3	23	Brazil_EH	Brazil_Sumidouro_10100BP.SG	palegreen1	22	352922	3666	96258	327885	359879	5113	70.39	64554	379586	4391	86438	1431829	384038	4683	81998	460139
Mbuti	A460	I12360	SouthPatagonia_MH	Chile_WesternArchipelago_Ayayema_5100BP.SG	blue3	23	SouthPatagonia_LH	Argentina_MitrePeninsula_Haush_400BP.Capt	blue1	3	393106	4927	79783	76520	NA	NA	NA	NA	NA	NA	NA	NA	NA	NA	NA	NA
Mbuti	A460	I0309	SouthPatagonia_MH	Chile_WesternArchipelago_Ayayema_5100BP.SG	blue3	23	Pampa_MH	Argentina_ArroyoSeco2_7700BP.Capt	lightblue	22	370029	3734	99098	388445	367201	5178	70914	74407	NA	NA	NA	NA	NA	NA	NA	NA
Mbuti	A460	I1864	SouthPatagonia_MH	Chile_WesternArchipelago_Ayayema_5100BP.SG	blue3	23	SouthernNorthAmerica_LH	Mexico_CoyoteCave_950BP.Capt	blueviolet	7	362171	3639	99528	339445	362505	5122	70769	63793	NA	NA	NA	NA	NA	NA	NA	NA
Mbuti	A460	I1743	SouthPatagonia_MH	Chile_WesternArchipelago_Ayayema_5100BP.SG	blue3	23	CentralAndes_LateHorizon_LH	Peru_SanSebastian_LH_500BP.Capt	darkorange2	2	373035	368	101374	279442	375962	5139	73152	52485	NA	NA	NA	NA	NA	NA	NA	NA
Mbuti	A460	AR0528	SouthPatagonia_MH	Chile_WesternArchipelago_Ayayema_5100BP.SG	blue3	23	Uspallata	LH-MF|LH-F	goldenrod1	21	368363	3459	106487	483182	372047	458	81239	94722	395261	4056	97446	2169861	39678	4304	92193	679333
Mbuti	A460	AR0500and513	SouthPatagonia_MH	Chile_WesternArchipelago_Ayayema_5100BP.SG	blue3	23	Uspallata	LH-MF|LH-F	goldenrod1	21	37113	3493	106252	395388	370114	4874	75932	77678	396968	4241	93598	1790966	397869	4499	88426	563774
Mbuti	A460	I2250	SouthPatagonia_MH	Chile_WesternArchipelago_Ayayema_5100BP.SG	blue3	23	CentralAndes_LateIntermediate_LH	Peru_Highlands_LIP_Chimu.Capt	orange1	5	369459	3888	95029	193398	NA	NA	NA	NA	NA	NA	NA	NA	NA	NA	NA	NA
Mbuti	A460	AR0518	SouthPatagonia_MH	Chile_WesternArchipelago_Ayayema_5100BP.SG	blue3	23	Uspallata	LH-MF|LH-F	goldenrod1	21	369956	3613	102406	785551	372149	4147	89741	155262	395414	431	91749	3699402	395238	4442	88986	1170759
Mbuti	A460	I0966	SouthPatagonia_MH	Chile_WesternArchipelago_Ayayema_5100BP.SG	blue3	23	CentralAndes_LateIntermediate_LH	Peru_LIP_Ychsma.Capt	orange1	9	369437	4032	91637	163282	NA	NA	NA	NA	NA	NA	NA	NA	NA	NA	NA	NA
Mbuti	A460	AR0519	SouthPatagonia_MH	Chile_WesternArchipelago_Ayayema_5100BP.SG	blue3	23	Uspallata	LH-MF|LH-F	goldenrod1	21	372599	3411	109221	778257	377785	4077	92.67	153886	397586	4129	96285	3632743	398075	4283	92939	1149746
Mbuti	A460	I12364	SouthPatagonia_MH	Chile_WesternArchipelago_Ayayema_5100BP.SG	blue3	23	SouthPatagonia_LH	Argentina_NorthTierradelFuego_Selknam_500BP.Capt	blue1	5	38588	4386	87971	141936	NA	NA	NA	NA	NA	NA	NA	NA	NA	NA	NA	NA
Mbuti	A460	I2238	SouthPatagonia_MH	Chile_WesternArchipelago_Ayayema_5100BP.SG	blue3	23	CentralAndes_EarlyIntermediate_LH	Peru_EIP_Moche.Capt	darkorange1	6	368298	4717	78077	79381	NA	NA	NA	NA	NA	NA	NA	NA	NA	NA	NA	NA
Mbuti	A460	MIS3	SouthPatagonia_MH	Chile_WesternArchipelago_Ayayema_5100BP.SG	blue3	23	CentralAndes_MiddleHorizon_LH	Bolivia_MH_Miraflores.Capt	orange2	2	363931	3316	109.76	588483	366136	4412	82978	114089	NA	NA	NA	NA	NA	NA	NA	NA
Mbuti	A460	Sumidouro7	SouthPatagonia_MH	Chile_WesternArchipelago_Ayayema_5100BP.SG	blue3	23	Brazil_EH	Brazil_Sumidouro_10100BP.SG	palegreen1	22	355011	3868	91778	208172	355839	5946	59843	41303	38375	4366	87886	922075	38786	4563	85	297910
Mbuti	A460	I11260	SouthPatagonia_MH	Chile_WesternArchipelago_Ayayema_5100BP.SG	blue3	23	California_Central_LH	USA_CA_Carmel_600BP.Capt	palevioletred1	6	365262	3557	102698	537543	368553	4582	80439	102080	NA	NA	NA	NA	NA	NA	NA	NA
Mbuti	A460	Lapa25	SouthPatagonia_MH	Chile_WesternArchipelago_Ayayema_5100BP.SG	blue3	23	Brazil_EH	Brazil_LapaDoSanto_9600BP.Capt	palegreen1	21	364692	3638	100.24	394121	36426	4811	75714	74714	NA	NA	NA	NA	NA	NA	NA	NA
Mbuti	A460	AR0512	SouthPatagonia_MH	Chile_WesternArchipelago_Ayayema_5100BP.SG	blue3	23	Uspallata	LH-MF|LH-F	goldenrod1	21	371127	3409	108868	857552	371266	4063	91.37	169571	398124	4246	93764	4045418	399229	4353	91.71	1279473
Mbuti	A460	SN-38	SouthPatagonia_MH	Chile_WesternArchipelago_Ayayema_5100BP.SG	blue3	23	California_SouthernChannelIslands_LH	USA_CA_SanNicolas_1600BP.SG	violet	8	361237	5118	70585	62892	NA	NA	NA	NA	386596	4717	81951	270472	391092	5388	72587	86008
Mbuti	A460	AR0520	SouthPatagonia_MH	Chile_WesternArchipelago_Ayayema_5100BP.SG	blue3	23	Uspallata	LH-LFplc|LH-F	darkorange	22	372345	3969	93818	211662	380744	6011	63337	41934	392746	4188	93786	972187	391894	4486	87369	310101
Mbuti	A460	AR0517	SouthPatagonia_MH	Chile_WesternArchipelago_Ayayema_5100BP.SG	blue3	23	Uspallata	LH-MFout|LH-F	goldenrod1	23	370983	3602	103005	268780	376831	5413	69619	52753	39723	4088	97179	1167238	398161	441	90285	370298
Mbuti	A460	I0748	SouthPatagonia_MH	Chile_WesternArchipelago_Ayayema_5100BP.SG	blue3	23	California_SouthernChannelIslands_LH	USA_CA_SanClemente_500BP.Capt	violet	9	35724	3544	100801	650889	360777	439	82184	126251	NA	NA	NA	NA	NA	NA	NA	NA
Mbuti	A460	I2263	SouthPatagonia_MH	Chile_WesternArchipelago_Ayayema_5100BP.SG	blue3	23	CentralAndes_EarlyIntermediate_LH	Peru_ElBrujo_EIP_1300BP.Capt	darkorange1	1	36865	3696	99732	309230	368901	515	71635	58610	NA	NA	NA	NA	NA	NA	NA	NA
Mbuti	A460	333B	SouthPatagonia_MH	Chile_WesternArchipelago_Ayayema_5100BP.SG	blue3	23	CentralAmerica_LH	Mexico_SierraGorda_Postclassic.SG	darkviolet	3	364202	3447	105666	721514	36476	4272	85379	141797	389229	4099	94953	3484325	390189	4207	92737	1092378
Mbuti	A460	2417J	SouthPatagonia_MH	Chile_WesternArchipelago_Ayayema_5100BP.SG	blue3	23	CentralAmerica_LH	Mexico_SierraGorda_Postclassic.SG	darkviolet	3	363314	3436	105728	607020	366509	437	83878	119651	386973	4137	93544	2896883	387139	4218	91791	910963
Mbuti	A460	I2544	SouthPatagonia_MH	Chile_WesternArchipelago_Ayayema_5100BP.SG	blue3	23	CentralAndes_LateIntermediate_LH	Peru_Chanka_LIP.Capt	orange1	4	365049	3515	103845	608457	368052	4391	83816	117097	NA	NA	NA	NA	NA	NA	NA	NA
Mbuti	A460	I8576	SouthPatagonia_MH	Chile_WesternArchipelago_Ayayema_5100BP.SG	blue3	23	SouthPatagonia_LH	Chile_NorthTierradelFuego_Selknam_100BP.Capt	blue1	6	384789	3753	102534	486103	387018	4734	81749	94483	NA	NA	NA	NA	NA	NA	NA	NA
Mbuti	A460	SN-32	SouthPatagonia_MH	Chile_WesternArchipelago_Ayayema_5100BP.SG	blue3	23	California_SouthernChannelIslands_MH	USA_CA_SanNicolas_4800BP.SG	violet	23	367285	49	74955	79906	NA	NA	NA	NA	392201	4651	84335	343131	397023	531	74764	108665
Mbuti	A460	Aconcagua	SouthPatagonia_MH	Chile_WesternArchipelago_Ayayema_5100BP.SG	blue3	23	QhapaqHucha_Inka_LH	Argentina_Aconcagua_Inca_500BP.SG	brown3	9	373496	3551	105166	791030	375901	4283	87768	156997	398116	4047	98377	3757327	397701	4131	96284	1201442
Mbuti	A460	I11557	SouthPatagonia_MH	Chile_WesternArchipelago_Ayayema_5100BP.SG	blue3	23	California_NorthernChannelIslands_MH	USA_CA_SantaRosa_7400BP.Capt	violet	21	366431	3665	99.99	626208	366233	4529	80862	121058	NA	NA	NA	NA	NA	NA	NA	NA
Mbuti	A460	I0756	SouthPatagonia_MH	Chile_WesternArchipelago_Ayayema_5100BP.SG	blue3	23	California_SouthernChannelIslands_LH	USA_CA_SanClemente_500BP.Capt	violet	9	354503	3428	103418	602066	352519	4386	80372	116951	NA	NA	NA	NA	NA	NA	NA	NA
Mbuti	A460	PS-18	SouthPatagonia_MH	Chile_WesternArchipelago_Ayayema_5100BP.SG	blue3	23	California_SouthernMainland_LH	USA_CA_PointSal_1500BP.SG	palevioletred3	2	368356	5243	70259	63213	NA	NA	NA	NA	393465	4656	84503	287107	399507	5509	72524	90089
Mbuti	A460	I0977	SouthPatagonia_MH	Chile_WesternArchipelago_Ayayema_5100BP.SG	blue3	23	CentralAndes_MiddleHorizon_LH	Bolivia_MH_Tiwanaku.Capt	orange2	3	365718	5757	63526	40085	NA	NA	NA	NA	NA	NA	NA	NA	NA	NA	NA	NA
Mbuti	A460	Lovelock3	SouthPatagonia_MH	Chile_WesternArchipelago_Ayayema_5100BP.SG	blue3	23	SouthernNorthAmerica_LH	USA_Nevada_LovelockCave_600BP.SG	blueviolet	2	364363	347	105017	878716	366582	4236	86541	174622	38698	423	91476	4417198	387046	4368	88.6	1399801
Mbuti	A460	SM-01	SouthPatagonia_MH	Chile_WesternArchipelago_Ayayema_5100BP.SG	blue3	23	California_NorthernChannelIslands_LH	USA_CA_SanMiguel_650BP.SG	violet	1	363316	4778	76044	78386	NA	NA	NA	NA	390875	4546	85983	332356	392796	5382	72984	104216
Mbuti	A460	I3565	SouthPatagonia_MH	Chile_WesternArchipelago_Ayayema_5100BP.SG	blue3	23	California_NorthernChannelIslands_LH	USA_CA_SantaRosa_3000BP.Capt	violet	3	366339	3688	99344	581836	370176	4743	78053	111018	NA	NA	NA	NA	NA	NA	NA	NA
Mbuti	A460	I8348	SouthPatagonia_MH	Chile_WesternArchipelago_Ayayema_5100BP.SG	blue3	23	Pampa_MH	Argentina_LagunaChica_6800BP.Capt	lightblue	23	371229	435	85334	121156	NA	NA	NA	NA	NA	NA	NA	NA	NA	NA	NA	NA
Mbuti	A460	I12943	SouthPatagonia_MH	Chile_WesternArchipelago_Ayayema_5100BP.SG	blue3	23	SouthPatagonia_LH	Argentina_BeagleChannel_Yamana_100BP.Capt	blue1	1	395391	3727	106085	616914	40201	4618	87053	118669	NA	NA	NA	NA	NA	NA	NA	NA
Mbuti	A460	SN-16	SouthPatagonia_MH	Chile_WesternArchipelago_Ayayema_5100BP.SG	blue3	23	California_SouthernChannelIslands_LH	USA_CA_SanNicolas_1600BP.SG	violet	8	35731	4506	79304	91603	NA	NA	NA	NA	384909	4399	87498	382478	385247	5042	76405	119596
Mbuti	A460	AM74	SouthPatagonia_MH	Chile_WesternArchipelago_Ayayema_5100BP.SG	blue3	23	SouthPatagonia_LH	Chile_StraitOfMagellan_Kaweskar_100BP.SG	blue1	8	389003	384	101302	274542	396075	5522	71722	52455	417739	4164	100326	1267244	420803	4394	95777	384899
Mbuti	A460	I1744	SouthPatagonia_MH	Chile_WesternArchipelago_Ayayema_5100BP.SG	blue3	23	CentralAndes_LateIntermediate_LH	Peru_SanSebastian_LIP_600BP.Capt	orange1	11	370133	3455	107133	511246	373381	4565	81799	97116	NA	NA	NA	NA	NA	NA	NA	NA
Mbuti	A460	KCA-1298	SouthPatagonia_MH	Chile_WesternArchipelago_Ayayema_5100BP.SG	blue3	23	CentralAndes_LateHorizon_LH	Peru_Kusicancha1_LH.Capt	darkorange2	8	369021	3532	104471	555703	370498	4436	83519	107225	NA	NA	NA	NA	NA	NA	NA	NA
Mbuti	A460	I1484	SouthPatagonia_MH	Chile_WesternArchipelago_Ayayema_5100BP.SG	blue3	23	CentralAndes_MiddleHorizon_LH	Peru_Laramate_900BP.Capt	orange2	8	370232	3638	101775	500924	372641	4576	81431	94927	NA	NA	NA	NA	NA	NA	NA	NA
Mbuti	A460	KMA-2-2	SouthPatagonia_MH	Chile_WesternArchipelago_Ayayema_5100BP.SG	blue3	23	CentralAndes_LateHorizon_LH	Peru_Kanamarka2_LH.Capt	darkorange2	6	371083	3518	105467	626016	370312	4612	80297	121664	NA	NA	NA	NA	NA	NA	NA	NA
Mbuti	A460	I0758	SouthPatagonia_MH	Chile_WesternArchipelago_Ayayema_5100BP.SG	blue3	23	California_SouthernChannelIslands_LH	USA_CA_SanClemente_500BP.Capt	violet	9	356251	3493	101994	524362	356887	4508	79.17	101636	NA	NA	NA	NA	NA	NA	NA	NA
Mbuti	A460	I0237	SouthPatagonia_MH	Chile_WesternArchipelago_Ayayema_5100BP.SG	blue3	23	CentralAndes_MiddleHorizon_LH	Peru_Laramate_900BP.Capt	orange2	8	370131	3737	99034	280448	367541	5338	68852	52215	NA	NA	NA	NA	NA	NA	NA	NA
Mbuti	A460	I0976	SouthPatagonia_MH	Chile_WesternArchipelago_Ayayema_5100BP.SG	blue3	23	CentralAndes_MiddleHorizon_LH	Bolivia_MH_Tiwanaku.Capt	orange2	3	365854	4503	81246	103162	NA	NA	NA	NA	NA	NA	NA	NA	NA	NA	NA	NA
Mbuti	A460	SHN-212	SouthPatagonia_MH	Chile_WesternArchipelago_Ayayema_5100BP.SG	blue3	23	CentralAndes_LateHorizon_LH	Peru_Sacsahuaman1_LH.Capt	darkorange2	12	363416	4542	80008	87284	NA	NA	NA	NA	NA	NA	NA	NA	NA	NA	NA	NA
Mbuti	A460	I2539	SouthPatagonia_MH	Chile_WesternArchipelago_Ayayema_5100BP.SG	blue3	23	CentralAndes_MiddleHorizon_LH	Chile_CaletaHuelen_MH_1100BP.Capt	orange2	5	371927	555	67011	45000	NA	NA	NA	NA	NA	NA	NA	NA	NA	NA	NA	NA
Mbuti	A460	I2242	SouthPatagonia_MH	Chile_WesternArchipelago_Ayayema_5100BP.SG	blue3	23	CentralAndes_MiddleHorizonLateIntermeditae_LH	Peru_MH_LIP_ElBrujo_850BP.Capt	darkorange3	1	375943	3844	97.79	258315	372103	5455	68209	49660	NA	NA	NA	NA	NA	NA	NA	NA
Mbuti	A460	AR0504	SouthPatagonia_MH	Chile_WesternArchipelago_Ayayema_5100BP.SG	blue3	23	Uspallata	LH-MF|LH-F	goldenrod1	21	365623	3409	107252	842617	371055	4083	90868	166093	390993	4184	93452	3895642	393239	4332	90769	1229385
Mbuti	A460	AM71	SouthPatagonia_MH	Chile_WesternArchipelago_Ayayema_5100BP.SG	blue3	23	SouthPatagonia_LH	Chile_StraitOfMagellan_Kaweskar_100BP.SG	blue1	8	400476	5358	74746	65484	NA	NA	NA	NA	42781	4738	90.29	324700	436207	5511	79151	95533
Mbuti	A460	I2244	SouthPatagonia_MH	Chile_WesternArchipelago_Ayayema_5100BP.SG	blue3	23	CentralAndes_MiddleHorizonLateIntermeditae_LH	Peru_MH_LIP_Lambayeque.Capt	darkorange3	2	366261	3468	105614	451736	367144	4518	81255	87143	NA	NA	NA	NA	NA	NA	NA	NA
Mbuti	A460	I12356	SouthPatagonia_MH	Chile_WesternArchipelago_Ayayema_5100BP.SG	blue3	23	SouthPatagonia_LH	Argentina_MitrePeninsula_Haush_400BP.Capt	blue1	3	389002	3774	103076	438949	387172	4876	79406	82816	NA	NA	NA	NA	NA	NA	NA	NA
Mbuti	A460	I15175	SouthPatagonia_MH	Chile_WesternArchipelago_Ayayema_5100BP.SG	blue3	23	California_Central_LH	USA_CA_CalaverasCounty_600BP.Capt	palevioletred1	7	365385	3555	102767	555319	368464	4479	82264	106543	NA	NA	NA	NA	NA	NA	NA	NA
Mbuti	A460	SN-13	SouthPatagonia_MH	Chile_WesternArchipelago_Ayayema_5100BP.SG	blue3	23	California_SouthernChannelIslands_LH	USA_CA_SanNicolas_1600BP.SG	violet	8	353736	3657	96735	389308	35684	4923	72479	75943	378649	4117	91971	1681006	381695	4415	86458	528832
Mbuti	A460	Sumidouro5	SouthPatagonia_MH	Chile_WesternArchipelago_Ayayema_5100BP.SG	blue3	23	Brazil_EH	Brazil_Sumidouro_10400BP.SG	palegreen1	22	36436	3493	104321	876102	370177	4169	88791	173569	388715	4273	90976	4187282	390896	4399	88856	1331314
Mbuti	A460	OTT-1160	SouthPatagonia_MH	Chile_WesternArchipelago_Ayayema_5100BP.SG	blue3	23	CentralAndes_LateIntermediate_LH	Peru_Ollantaytambo_LIP.Capt	orange1	13	367342	3528	104128	585448	368254	4384	83993	113169	NA	NA	NA	NA	NA	NA	NA	NA
Mbuti	A460	I1479	SouthPatagonia_MH	Chile_WesternArchipelago_Ayayema_5100BP.SG	blue3	23	CentralAndes_LateIntermediate_LH	Peru_Palpa_LIP_550BP.Capt	orange1	10	368532	3631	101495	393169	363985	4782	76.12	74738	NA	NA	NA	NA	NA	NA	NA	NA
Mbuti	A460	SN-20	SouthPatagonia_MH	Chile_WesternArchipelago_Ayayema_5100BP.SG	blue3	23	California_SouthernChannelIslands_MH	USA_CA_SanNicolas_4800BP.SG	violet	23	368496	5804	63.49	41013	NA	NA	NA	NA	397751	4788	83079	174171	403025	6038	66746	54632
Mbuti	A460	I0752	SouthPatagonia_MH	Chile_WesternArchipelago_Ayayema_5100BP.SG	blue3	23	California_SouthernChannelIslands_LH	USA_CA_SanClemente_500BP.Capt	violet	9	358526	42	85371	163286	NA	NA	NA	NA	NA	NA	NA	NA	NA	NA	NA	NA
Mbuti	A460	AR0521	SouthPatagonia_MH	Chile_WesternArchipelago_Ayayema_5100BP.SG	blue3	23	Uspallata	LH-MF|LH-F	goldenrod1	21	368728	3476	106074	565277	37613	4421	85074	111072	395283	4026	98184	2523948	396721	4187	94758	794369
Mbuti	A460	I21452	SouthPatagonia_MH	Chile_WesternArchipelago_Ayayema_5100BP.SG	blue3	23	California_SouthernMainland_LH	USA_CA_Goleta_900BP.Capt	palevioletred3	5	36452	3634	100306	376765	364013	4743	76.74	71916	NA	NA	NA	NA	NA	NA	NA	NA
Mbuti	A460	PS-06	SouthPatagonia_MH	Chile_WesternArchipelago_Ayayema_5100BP.SG	blue3	23	California_SouthernMainland_LH	USA_CA_PointSal_1500BP.SG	palevioletred3	2	361888	3639	99445	578407	365383	4612	79222	113507	389623	4369	89179	2497275	389259	4492	86651	788643
Mbuti	A460	Anzick	SouthPatagonia_MH	Chile_WesternArchipelago_Ayayema_5100BP.SG	blue3	23	SouthernNorthAmerica_EH	USA_Anzick.SG	blueviolet	21	362173	3716	97.47	867170	367761	4311	85315	171515	388385	4433	87605	4277421	391096	4544	86064	1348254
Mbuti	A460	I12354	SouthPatagonia_MH	Chile_WesternArchipelago_Ayayema_5100BP.SG	blue3	23	SouthPatagonia_LH	Argentina_NorthTierradelFuego_Selknam_500BP.Capt	blue1	5	384442	3677	104544	657268	386545	4504	85829	126747	NA	NA	NA	NA	NA	NA	NA	NA
Mbuti	A460	I1358	SouthPatagonia_MH	Chile_WesternArchipelago_Ayayema_5100BP.SG	blue3	23	CentralAndes_LateIntermediate_LH	Peru_LIP_Pacapaccari_600BP.Capt	orange1	8	36941	3668	100718	410270	368307	4862	75746	78560	NA	NA	NA	NA	NA	NA	NA	NA
Mbuti	A460	I0044	SouthPatagonia_MH	Chile_WesternArchipelago_Ayayema_5100BP.SG	blue3	23	CentralAndes_LateIntermediate_LH	Peru_Lima_LIP_650BP.Capt	orange1	6	368589	3478	105992	705938	369521	4361	84731	137478	NA	NA	NA	NA	NA	NA	NA	NA
Mbuti	A460	I15170	SouthPatagonia_MH	Chile_WesternArchipelago_Ayayema_5100BP.SG	blue3	23	California_Central_LH	USA_CA_CalaverasCounty_1500BP.Capt	palevioletred1	8	364796	3561	102442	535009	364042	4424	82292	102771	NA	NA	NA	NA	NA	NA	NA	NA
Mbuti	A460	I0760	SouthPatagonia_MH	Chile_WesternArchipelago_Ayayema_5100BP.SG	blue3	23	California_SouthernChannelIslands_LH	USA_CA_SanClemente_500BP.Capt	violet	9	356838	3432	103978	670830	360871	4426	81534	130300	NA	NA	NA	NA	NA	NA	NA	NA
Mbuti	A460	SN-53	SouthPatagonia_MH	Chile_WesternArchipelago_Ayayema_5100BP.SG	blue3	23	California_SouthernChannelIslands_LH	USA_CA_SanNicolas_1600BP.SG	violet	8	356808	3957	90163	201928	35437	6028	58787	39461	38706	4418	87601	855897	386706	4857	79615	266857
Mbuti	A460	SC-01	SouthPatagonia_MH	Chile_WesternArchipelago_Ayayema_5100BP.SG	blue3	23	California_SouthernChannelIslands_LH	USA_CA_SanClemente_900BP.SG	violet	7	36137	4157	86927	152425	NA	NA	NA	NA	383963	46	83466	665990	386853	5108	75732	212714
Mbuti	A460	SHN-575	SouthPatagonia_MH	Chile_WesternArchipelago_Ayayema_5100BP.SG	blue3	23	CentralAndes_LateHorizon_LH	Peru_Sacsahuaman2_LH.Capt	darkorange2	13	373113	36	103651	628096	372228	4348	85617	121746	NA	NA	NA	NA	NA	NA	NA	NA
Mbuti	A460	I0238	SouthPatagonia_MH	Chile_WesternArchipelago_Ayayema_5100BP.SG	blue3	23	CentralAndes_EH	Peru_Lauricocha_8600BP.Capt	darkorange4	22	373466	51	73229	59186	NA	NA	NA	NA	NA	NA	NA	NA	NA	NA	NA	NA
Mbuti	A460	I0969	SouthPatagonia_MH	Chile_WesternArchipelago_Ayayema_5100BP.SG	blue3	23	CentralAndes_LateIntermediate_LH	Peru_Lima_LIP_650BP.Capt	orange1	6	36776	568	64752	43958	NA	NA	NA	NA	NA	NA	NA	NA	NA	NA	NA	NA
Mbuti	A460	I2549	SouthPatagonia_MH	Chile_WesternArchipelago_Ayayema_5100BP.SG	blue3	23	CentralAndes_LateIntermediate_LH	Peru_Palpa_LIP_550BP.Capt	orange1	10	369269	3772	97901	275471	368052	5489	67047	51795	NA	NA	NA	NA	NA	NA	NA	NA
Mbuti	A460	AHUR770c	SouthPatagonia_MH	Chile_WesternArchipelago_Ayayema_5100BP.SG	blue3	23	SouthernNorthAmerica_EH	USA_Nevada_SpiritCave_11000BP.SG	blueviolet	22	370321	4715	78543	98003	NA	NA	NA	NA	395531	4737	83491	433283	396752	5385	73679	139707
Mbuti	A460	I0755	SouthPatagonia_MH	Chile_WesternArchipelago_Ayayema_5100BP.SG	blue3	23	California_SouthernChannelIslands_LH	USA_CA_SanClemente_500BP.Capt	violet	9	360464	3653	98674	343758	359641	4996	71979	66746	NA	NA	NA	NA	NA	NA	NA	NA
Mbuti	A460	I2252	SouthPatagonia_MH	Chile_WesternArchipelago_Ayayema_5100BP.SG	blue3	23	CentralAndes_MiddleHorizon_LH	Peru_Highlands_Chinchawas_MH.Capt	orange2	7	372373	386	96457	266583	369179	5796	63693	50726	NA	NA	NA	NA	NA	NA	NA	NA
Mbuti	A460	AR0514	SouthPatagonia_MH	Chile_WesternArchipelago_Ayayema_5100BP.SG	blue3	23	Uspallata	LH-MF|LH-F	goldenrod1	21	368831	3516	104907	466553	373711	4582	81566	91815	398016	4119	96621	2083203	398766	4296	92821	659260
Mbuti	A460	I12358	SouthPatagonia_MH	Chile_WesternArchipelago_Ayayema_5100BP.SG	blue3	23	SouthPatagonia_LH	Argentina_MitrePeninsula_Haush_400BP.Capt	blue1	3	388317	3755	103419	551185	389074	4551	85486	105839	NA	NA	NA	NA	NA	NA	NA	NA
Mbuti	A460	I11289	SouthPatagonia_MH	Chile_WesternArchipelago_Ayayema_5100BP.SG	blue3	23	California_SouthernMainland_MH	USA_CA_Goleta_4700BP.Capt	palevioletred3	21	369744	4276	86472	185896	NA	NA	NA	NA	NA	NA	NA	NA	NA	NA	NA	NA
Mbuti	A460	I2551	SouthPatagonia_MH	Chile_WesternArchipelago_Ayayema_5100BP.SG	blue3	23	CentralAndes_MiddleHorizon_LH	Peru_Laramate_900BP.Capt	orange2	8	368943	3514	104978	553930	367663	4542	80942	105862	NA	NA	NA	NA	NA	NA	NA	NA
Mbuti	A460	Cuncaicha15-07	SouthPatagonia_MH	Chile_WesternArchipelago_Ayayema_5100BP.SG	blue3	23	CentralAndes_EH	Peru_Cuncaicha_9000BP.Capt	darkorange4	21	367699	3648	100797	529034	36887	465	79327	100920	NA	NA	NA	NA	NA	NA	NA	NA
Mbuti	A460	Yaghan895	SouthPatagonia_MH	Chile_WesternArchipelago_Ayayema_5100BP.SG	blue3	23	SouthPatagonia_LH	Argentina_BeagleChannel_Yamana_100BP.SG	blue1	1	393584	3678	107004	421722	390636	4806	81278	79722	425245	4564	93181	1954566	427468	4833	88453	583184
Mbuti	A460	AR0526	SouthPatagonia_MH	Chile_WesternArchipelago_Ayayema_5100BP.SG	blue3	23	Uspallata	LH-MF|LH-F	goldenrod1	21	370233	3641	101673	686516	37684	4423	85201	135283	398898	4316	92429	3124790	400087	4491	89092	988291
Mbuti	A460	I11285	SouthPatagonia_MH	Chile_WesternArchipelago_Ayayema_5100BP.SG	blue3	23	California_SouthernMainland_LH	USA_CA_LakeCachuma_400BP.Capt	palevioletred3	4	364022	3771	96527	248493	362058	5463	66277	46058	NA	NA	NA	NA	NA	NA	NA	NA
Mbuti	A460	AR0510	SouthPatagonia_MH	Chile_WesternArchipelago_Ayayema_5100BP.SG	blue3	23	Uspallata	LH-MF|LH-F	goldenrod1	21	36778	3455	106435	765726	371405	4282	86729	151302	393291	4161	94514	3591968	394182	4274	92238	1137650
Mbuti	A460	IO2	SouthPatagonia_MH	Chile_WesternArchipelago_Ayayema_5100BP.SG	blue3	23	CentralAndes_MiddleHorizon_LH	Bolivia_MH_Iroco_1050BP.Capt	orange2	1	370137	3641	101647	413824	365176	4827	75658	80128	NA	NA	NA	NA	NA	NA	NA	NA
Mbuti	A460	AR0151	SouthPatagonia_MH	Chile_WesternArchipelago_Ayayema_5100BP.SG	blue3	23	Uspallata	LH-HG|LH-HG	darkorange4	23	370722	3792	97756	279931	371576	5147	72186	56414	395942	4579	86463	1389350	391983	4657	84166	446765
Mbuti	A460	PS-02	SouthPatagonia_MH	Chile_WesternArchipelago_Ayayema_5100BP.SG	blue3	23	California_SouthernMainland_LH	USA_CA_PointSal_1500BP.SG	palevioletred3	2	NA	NA	NA	NA	NA	NA	NA	NA	384723	5056	76093	127564	NA	NA	NA	NA
Mbuti	A460	AHUR_2064	SouthPatagonia_MH	Chile_WesternArchipelago_Ayayema_5100BP.SG	blue3	23	SouthernNorthAmerica_EH	USA_Nevada_SpiritCave_11000BP.SG	blueviolet	22	36626	3496	104774	878607	371306	4264	87077	174514	393015	4253	92418	4390818	393162	4343	90522	1392677
Mbuti	A460	CCA-7-2	SouthPatagonia_MH	Chile_WesternArchipelago_Ayayema_5100BP.SG	blue3	23	CentralAndes_LateHorizon_LH	Peru_CasaConcha2_LH.Capt	darkorange2	4	369522	3505	105416	659329	36824	4365	84362	127835	NA	NA	NA	NA	NA	NA	NA	NA
Mbuti	A460	BC25	SouthPatagonia_MH	Chile_WesternArchipelago_Ayayema_5100BP.SG	blue3	23	California_Baja_LH	Mexico_Pericues.SG	palevioletred1	3	352253	4258	82734	102479	NA	NA	NA	NA	381931	4161	91784	453491	384174	4715	81485	135541
Mbuti	A460	I0968	SouthPatagonia_MH	Chile_WesternArchipelago_Ayayema_5100BP.SG	blue3	23	CentralAndes_MiddleHorizon_LH	Peru_LimaCoast_MH_1000BP.Capt	orange2	10	377161	5545	68021	47654	NA	NA	NA	NA	NA	NA	NA	NA	NA	NA	NA	NA
Mbuti	A460	TOY-7A-1	SouthPatagonia_MH	Chile_WesternArchipelago_Ayayema_5100BP.SG	blue3	23	CentralAndes_LateIntermediate_LH	Peru_Torontoy_500BP.Capt	orange1	12	370237	3557	104.1	585707	37159	4545	81749	114158	NA	NA	NA	NA	NA	NA	NA	NA
Mbuti	A460	I2560	SouthPatagonia_MH	Chile_WesternArchipelago_Ayayema_5100BP.SG	blue3	23	CentralAndes_MiddleHorizon_LH	Peru_Ullujaya_MH_950BP.Capt	orange2	9	369244	3643	101367	399408	369643	4799	77026	75624	NA	NA	NA	NA	NA	NA	NA	NA
Mbuti	A460	SN-01	SouthPatagonia_MH	Chile_WesternArchipelago_Ayayema_5100BP.SG	blue3	23	California_SouthernChannelIslands_LH	USA_CA_SanNicolas_1600BP.SG	violet	8	354894	4873	72823	72469	NA	NA	NA	NA	385662	4596	83917	306474	384076	5314	72273	97006
Mbuti	A460	I12357	SouthPatagonia_MH	Chile_WesternArchipelago_Ayayema_5100BP.SG	blue3	23	SouthPatagonia_LH	Argentina_MitrePeninsula_Haush_400BP.Capt	blue1	3	388688	3779	102.85	406072	392182	4878	80399	76861	NA	NA	NA	NA	NA	NA	NA	NA
Mbuti	A460	SA5832	SouthPatagonia_MH	Chile_WesternArchipelago_Ayayema_5100BP.SG	blue3	23	SouthPatagonia_MH	Chile_PuntaSantaAna_7300BP.SG	blue3	22	392781	3732	105258	573019	400011	4766	83923	112163	422026	4466	94504	2713731	424938	4658	91232	847014
Mbuti	A460	I17497	SouthPatagonia_MH	Chile_WesternArchipelago_Ayayema_5100BP.SG	blue3	23	CentralAndes_LateIntermediate_LH	Chile_LIP_Pukara_600BP.Capt	orange1	1	369256	4325	85.38	123534	NA	NA	NA	NA	NA	NA	NA	NA	NA	NA	NA	NA
Mbuti	A460	I2243	SouthPatagonia_MH	Chile_WesternArchipelago_Ayayema_5100BP.SG	blue3	23	CentralAndes_MiddleHorizonLateIntermeditae_LH	Peru_MH_LIP_Lambayeque.Capt	darkorange3	2	369088	5274	69.98	53466	NA	NA	NA	NA	NA	NA	NA	NA	NA	NA	NA	NA
Mbuti	A460	I0978	SouthPatagonia_MH	Chile_WesternArchipelago_Ayayema_5100BP.SG	blue3	23	CentralAndes_MiddleHorizon_LH	Bolivia_MH_Tiwanaku.Capt	orange2	3	371311	4255	87275	131173	NA	NA	NA	NA	NA	NA	NA	NA	NA	NA	NA	NA
Mbuti	A460	I1485	SouthPatagonia_MH	Chile_WesternArchipelago_Ayayema_5100BP.SG	blue3	23	CentralAndes_MiddleHorizon_LH	Peru_Laramate_900BP.Capt	orange2	8	370558	3674	100858	506230	373088	4641	80388	96449	NA	NA	NA	NA	NA	NA	NA	NA
Mbuti	A460	Sumidouro8	SouthPatagonia_MH	Chile_WesternArchipelago_Ayayema_5100BP.SG	blue3	23	Brazil_EH	Brazil_Sumidouro_9800BP.SG	palegreen1	22	360253	4984	72278	79554	NA	NA	NA	NA	381063	4646	82027	345207	386851	5378	71928	112147
Mbuti	A460	SC-04	SouthPatagonia_MH	Chile_WesternArchipelago_Ayayema_5100BP.SG	blue3	23	California_SouthernChannelIslands_LH	USA_CA_SanClemente_900BP.SG	violet	7	362024	4089	88544	150937	NA	NA	NA	NA	387013	454	85252	665401	39054	4974	78519	213889
Mbuti	A460	I11551	SouthPatagonia_MH	Chile_WesternArchipelago_Ayayema_5100BP.SG	blue3	23	California_Central_LH	USA_CA_Carmel_600BP.Capt	palevioletred1	6	368715	414	89054	175936	NA	NA	NA	NA	NA	NA	NA	NA	NA	NA	NA	NA
Mbuti	A460	E8CdV	SouthPatagonia_MH	Chile_WesternArchipelago_Ayayema_5100BP.SG	blue3	23	CentralAmerica_LH	Mexico_CanadaDeLaVirgen_MidClassic.SG	darkviolet	2	361888	4002	90429	221303	364278	6013	60587	43202	392289	4345	90293	1252539	391534	4561	85835	385833
Mbuti	A460	Sumidouro6	SouthPatagonia_MH	Chile_WesternArchipelago_Ayayema_5100BP.SG	blue3	23	Brazil_EH	Brazil_Sumidouro_10100BP.SG	palegreen1	22	35659	3687	96727	570637	358623	4596	78037	112392	381815	4409	86609	2434463	384119	4573	83992	779030
Mbuti	A460	I0040	SouthPatagonia_MH	Chile_WesternArchipelago_Ayayema_5100BP.SG	blue3	23	CentralAndes_MH	Peru_Lauricocha_5800BP.Capt	orange4	24	365921	3561	102753	464428	366485	4621	79309	90056	NA	NA	NA	NA	NA	NA	NA	NA
Mbuti	A460	QKI-21-1	SouthPatagonia_MH	Chile_WesternArchipelago_Ayayema_5100BP.SG	blue3	23	CentralAndes_LateHorizon_LH	Peru_Qotakalli1_LH.Capt	darkorange2	10	362138	4157	87119	129345	NA	NA	NA	NA	NA	NA	NA	NA	NA	NA	NA	NA
Mbuti	A460	SN_50	SouthPatagonia_MH	Chile_WesternArchipelago_Ayayema_5100BP.SG	blue3	23	California_SouthernChannelIslands_LH	USA_CA_SanNicolas_1600BP.SG	violet	8	362421	3735	97028	309422	365965	5013	73006	60431	388981	4326	89.91	1332622	390131	4558	85595	418919
Mbuti	A460	Lovelock2	SouthPatagonia_MH	Chile_WesternArchipelago_Ayayema_5100BP.SG	blue3	23	SouthernNorthAmerica_LH	USA_Nevada_LovelockCave_1850BP.SG	blueviolet	1	364104	3544	102736	878518	363278	4168	87161	174464	390596	4186	93303	4408879	390269	4306	90629	1397924
Mbuti	A460	MOS001	SouthPatagonia_MH	Chile_WesternArchipelago_Ayayema_5100BP.SG	blue3	23	Brazil_MH	Brazil_Moraes_5800BP.Capt	palegreen4	24	365562	4057	90101	187895	NA	NA	NA	NA	NA	NA	NA	NA	NA	NA	NA	NA
Mbuti	A460	Cuncaicha15-03	SouthPatagonia_MH	Chile_WesternArchipelago_Ayayema_5100BP.SG	blue3	23	CentralAndes_MH	Peru_Cuncaicha_4200BP.Capt	orange4	21	370132	3515	105314	517503	370385	4611	80327	98362	NA	NA	NA	NA	NA	NA	NA	NA
Mbuti	A460	I15176	SouthPatagonia_MH	Chile_WesternArchipelago_Ayayema_5100BP.SG	blue3	23	California_Central_LH	USA_CA_CalaverasCounty_600BP.Capt	palevioletred1	7	364911	3697	98696	353868	364615	5081	71759	66916	NA	NA	NA	NA	NA	NA	NA	NA
Mbuti	A460	Lapa24	SouthPatagonia_MH	Chile_WesternArchipelago_Ayayema_5100BP.SG	blue3	23	Brazil_EH	Brazil_LapaDoSanto_9200BP.Capt	palegreen1	21	363102	3725	97468	481217	365281	4779	76434	91938	NA	NA	NA	NA	NA	NA	NA	NA
Mbuti	A460	I2241	SouthPatagonia_MH	Chile_WesternArchipelago_Ayayema_5100BP.SG	blue3	23	CentralAndes_MiddleHorizonLateIntermeditae_LH	Peru_MH_LIP_Lambayeque.Capt	darkorange3	2	375355	3624	103587	575046	377087	4568	82555	111115	NA	NA	NA	NA	NA	NA	NA	NA
Mbuti	A460	SM-02	SouthPatagonia_MH	Chile_WesternArchipelago_Ayayema_5100BP.SG	blue3	23	California_NorthernChannelIslands_LH	USA_CA_SanMiguel_650BP.SG	violet	1	370003	3511	105387	721737	368108	4406	83548	141848	396803	4139	95866	3232977	396987	429	92534	1019911
Mbuti	A460	PS-09	SouthPatagonia_MH	Chile_WesternArchipelago_Ayayema_5100BP.SG	blue3	23	California_SouthernMainland_LH	USA_CA_PointSal_1500BP.SG	palevioletred3	2	358744	4789	74917	67874	NA	NA	NA	NA	387026	4557	84927	296028	389914	5302	73541	92262
Mbuti	A460	CT-01	SouthPatagonia_MH	Chile_WesternArchipelago_Ayayema_5100BP.SG	blue3	23	California_SouthernChannelIslands_LH	USA_CA_SanCatalina_400BP.SG	violet	6	357662	3566	100303	802305	358803	4401	81519	158712	381525	4199	90871	3625993	381509	4345	87796	1147219
Mbuti	A460	MIS5	SouthPatagonia_MH	Chile_WesternArchipelago_Ayayema_5100BP.SG	blue3	23	CentralAndes_MiddleHorizon_LH	Bolivia_MH_Miraflores.Capt	orange2	2	371947	3595	103463	326148	36027	5058	71224	62707	NA	NA	NA	NA	NA	NA	NA	NA
Mbuti	A460	CCA-5-1	SouthPatagonia_MH	Chile_WesternArchipelago_Ayayema_5100BP.SG	blue3	23	CentralAndes_LateHorizon_LH	Peru_CasaConcha2_LH.Capt	darkorange2	4	371309	3389	109562	639189	371303	4205	88305	124367	NA	NA	NA	NA	NA	NA	NA	NA
Mbuti	A460	QKI-4	SouthPatagonia_MH	Chile_WesternArchipelago_Ayayema_5100BP.SG	blue3	23	CentralAndes_LateHorizon_LH	Peru_Qotakalli2_LH.Capt	darkorange2	11	36908	3569	103406	541870	368131	4438	82945	105025	NA	NA	NA	NA	NA	NA	NA	NA
Mbuti	A460	B-04	SouthPatagonia_MH	Chile_WesternArchipelago_Ayayema_5100BP.SG	blue3	23	California_Baja_LH	Mexico_Baja_Comondu_Unknown.SG	palevioletred1	1	350981	5746	61078	45056	NA	NA	NA	NA	383002	4864	78743	194561	380334	5882	64657	61283
Mbuti	A460	AR0508	SouthPatagonia_MH	Chile_WesternArchipelago_Ayayema_5100BP.SG	blue3	23	Uspallata	LH-MF|LH-F	goldenrod1	21	367822	3556	103441	464270	372892	4631	80528	90669	397195	4165	95371	2073799	399438	4338	92076	649970
Mbuti	A460	I2710	SouthPatagonia_MH	Chile_WesternArchipelago_Ayayema_5100BP.SG	blue3	23	California_NorthernChannelIslands_MH	USA_CA_SantaRosa_7400BP.Capt	violet	21	369376	4083	90467	199570	NA	NA	NA	NA	NA	NA	NA	NA	NA	NA	NA	NA
Mbuti	A460	Lovelock1	SouthPatagonia_MH	Chile_WesternArchipelago_Ayayema_5100BP.SG	blue3	23	SouthernNorthAmerica_LH	USA_Nevada_LovelockCave_1850BP.SG	blueviolet	1	364991	3548	102877	667656	367213	4453	82465	132586	392097	4354	90044	3146539	392041	4449	88113	999150
Mbuti	A460	KMA-19-1	SouthPatagonia_MH	Chile_WesternArchipelago_Ayayema_5100BP.SG	blue3	23	CentralAndes_LateHorizon_LH	Peru_Kanamarka3_LH.Capt	darkorange2	7	364369	3478	104759	655636	365094	4391	83143	127070	NA	NA	NA	NA	NA	NA	NA	NA
Mbuti	A460	Yaghan894	SouthPatagonia_MH	Chile_WesternArchipelago_Ayayema_5100BP.SG	blue3	23	SouthPatagonia_LH	Argentina_BeagleChannel_Yamana_100BP.SG	blue1	1	389079	3754	103655	388667	392953	5211	75.41	73366	422537	4299	98.29	1785450	425425	4576	92961	534312
Mbuti	A460	I8349	SouthPatagonia_MH	Chile_WesternArchipelago_Ayayema_5100BP.SG	blue3	23	Pampa_MH	Argentina_LagunaChica_6800BP.Capt	lightblue	23	374551	3878	96593	265180	376635	5806	64868	48287	NA	NA	NA	NA	NA	NA	NA	NA
Mbuti	A460	I7090	SouthPatagonia_MH	Chile_WesternArchipelago_Ayayema_5100BP.SG	blue3	23	Pampa_MH	Argentina_ArroyoSeco2_7200BP.Capt	lightblue	21	365812	4162	87889	143430	NA	NA	NA	NA	NA	NA	NA	NA	NA	NA	NA	NA
Mbuti	A460	I1754	SouthPatagonia_MH	Chile_WesternArchipelago_Ayayema_5100BP.SG	blue3	23	CentralChile_LH	Chile_Conchali_700BP.Capt	brown1	1	377213	3517	107244	607814	38018	4491	84646	116919	NA	NA	NA	NA	NA	NA	NA	NA
Mbuti	A460	KMA-15A-1	SouthPatagonia_MH	Chile_WesternArchipelago_Ayayema_5100BP.SG	blue3	23	CentralAndes_LateHorizon_LH	Peru_Kanamarka1_LH.Capt	darkorange2	5	369409	3533	104574	677554	373463	4451	83902	131666	NA	NA	NA	NA	NA	NA	NA	NA
Mbuti	A460	I12367	SouthPatagonia_MH	Chile_WesternArchipelago_Ayayema_5100BP.SG	blue3	23	SouthPatagonia_LH	Argentina_NorthTierradelFuego_Selknam_500BP.Capt	blue1	5	386632	3723	103839	259256	393968	5621	70093	49386	NA	NA	NA	NA	NA	NA	NA	NA
Mbuti	A460	I15172	SouthPatagonia_MH	Chile_WesternArchipelago_Ayayema_5100BP.SG	blue3	23	California_Central_LH	USA_CA_CalaverasCounty_600BP.Capt	palevioletred1	7	362823	4487	80855	99028	NA	NA	NA	NA	NA	NA	NA	NA	NA	NA	NA	NA
Mbuti	A460	I5457	SouthPatagonia_MH	Chile_WesternArchipelago_Ayayema_5100BP.SG	blue3	23	CentralAmerica_MH	Belize_7400BP.Capt	mediumvioletred	24	371452	4	92863	184806	NA	NA	NA	NA	NA	NA	NA	NA	NA	NA	NA	NA
Mbuti	A460	I8351	SouthPatagonia_MH	Chile_WesternArchipelago_Ayayema_5100BP.SG	blue3	23	Pampa_LH	Argentina_LagunaChica_1600BP.Capt	lightblue	1	373788	3541	105555	443958	369107	4755	77632	83021	NA	NA	NA	NA	NA	NA	NA	NA
Mbuti	A460	I2707	SouthPatagonia_MH	Chile_WesternArchipelago_Ayayema_5100BP.SG	blue3	23	California_NorthernChannelIslands_LH	USA_CA_SantaRosa_300BP.Capt	violet	4	366704	3469	105694	598908	36529	4339	84181	114638	NA	NA	NA	NA	NA	NA	NA	NA
Mbuti	A460	I2251	SouthPatagonia_MH	Chile_WesternArchipelago_Ayayema_5100BP.SG	blue3	23	CentralAndes_LateIntermediate_LH	Peru_Highlands_LIP_Chimu.Capt	orange1	5	375499	3621	103703	483137	375376	4602	81565	91695	NA	NA	NA	NA	NA	NA	NA	NA
Mbuti	A460	I14825	SouthPatagonia_MH	Chile_WesternArchipelago_Ayayema_5100BP.SG	blue3	23	California_SouthernMainland_LH	USA_CA_Malibu_3400BP.Capt	palevioletred3	3	36531	3816	95722	238016	367293	5742	63966	44923	NA	NA	NA	NA	NA	NA	NA	NA
Mbuti	A460	I2540	SouthPatagonia_MH	Chile_WesternArchipelago_Ayayema_5100BP.SG	blue3	23	CentralAndes_MiddleHorizon_LH	Chile_CaletaHuelen_MH_1100BP.Capt	orange2	5	37148	3893	95428	283261	371659	5361	69331	54209	NA	NA	NA	NA	NA	NA	NA	NA
Mbuti	A460	I12359	SouthPatagonia_MH	Chile_WesternArchipelago_Ayayema_5100BP.SG	blue3	23	SouthPatagonia_LH	Argentina_MitrePeninsula_Haush_400BP.Capt	blue1	3	387362	4054	95541	218611	386585	581	66534	40882	NA	NA	NA	NA	NA	NA	NA	NA
Mbuti	A460	SN-25	SouthPatagonia_MH	Chile_WesternArchipelago_Ayayema_5100BP.SG	blue3	23	California_SouthernChannelIslands_MH	USA_CA_SanNicolas_4800BP.SG	violet	23	374946	5692	65871	44736	NA	NA	NA	NA	39119	4995	78322	196629	39067	604	64681	63133
Mbuti	A460	MA577	SouthPatagonia_MH	Chile_WesternArchipelago_Ayayema_5100BP.SG	blue3	23	SouthPatagonia_LH	Argentina_NorthTierradelFiego_Selknam_100BP.SG	blue1	4	381756	3591	106311	610390	38229	4426	86374	118127	41047	4241	96.79	2775453	412513	4346	94.91	849378
Mbuti	A460	SJArg-1	SouthPatagonia_MH	Chile_WesternArchipelago_Ayayema_5100BP.SG	blue3	23	Cuyo_LH	Argentina_Callingasta_1500BP.SG	brown3	1	37022	4129	89674	151354	NA	NA	NA	NA	395351	4184	94483	657527	401877	4595	87453	201956
Mbuti	A460	AR0509	SouthPatagonia_MH	Chile_WesternArchipelago_Ayayema_5100BP.SG	blue3	23	Uspallata	LH-MF|LH-F	goldenrod1	21	365766	3454	105887	676339	373266	4221	88441	133112	392077	4234	92592	3113276	393684	4422	89027	983375
Mbuti	A460	I2557	SouthPatagonia_MH	Chile_WesternArchipelago_Ayayema_5100BP.SG	blue3	23	CentralAndes_EarlyIntermediate_LH	Peru_Ullujaya_EIP_1350BP.Capt	darkorange1	5	366329	357	102606	293688	360221	5071	71034	55440	NA	NA	NA	NA	NA	NA	NA	NA
Mbuti	A460	I0967	SouthPatagonia_MH	Chile_WesternArchipelago_Ayayema_5100BP.SG	blue3	23	CentralAndes_LateIntermediate_LH	Peru_LIP_Ychsma.Capt	orange1	9	367283	4231	86803	145740	NA	NA	NA	NA	NA	NA	NA	NA	NA	NA	NA	NA
Mbuti	A460	Lapa14	SouthPatagonia_MH	Chile_WesternArchipelago_Ayayema_5100BP.SG	blue3	23	Brazil_EH	Brazil_LapaDoSanto_9600BP.Capt	palegreen1	21	36537	3581	102029	328776	366372	5274	69463	61353	NA	NA	NA	NA	NA	NA	NA	NA
Mbuti	A460	I14009	SouthPatagonia_MH	Chile_WesternArchipelago_Ayayema_5100BP.SG	blue3	23	CentralAndes_LateIntermediate_LH	Chile_LIP_Pukara_700BP.Capt	orange1	2	372572	4252	87.63	134617	NA	NA	NA	NA	NA	NA	NA	NA	NA	NA	NA	NA
Mbuti	A460	TOY-4-5	SouthPatagonia_MH	Chile_WesternArchipelago_Ayayema_5100BP.SG	blue3	23	CentralAndes_LateIntermediate_LH	Peru_Torontoy_500BP.Capt	orange1	12	369231	3737	98811	433310	369186	4955	74508	83736	NA	NA	NA	NA	NA	NA	NA	NA
Mbuti	A460	I12363	SouthPatagonia_MH	Chile_WesternArchipelago_Ayayema_5100BP.SG	blue3	23	SouthPatagonia_LH	Argentina_NorthTierradelFuego_Selknam_500BP.Capt	blue1	5	386555	3639	106.23	473123	391653	4681	83668	90354	NA	NA	NA	NA	NA	NA	NA	NA
Mbuti	A460	OTT-1165	SouthPatagonia_MH	Chile_WesternArchipelago_Ayayema_5100BP.SG	blue3	23	CentralAndes_LateIntermediate_LH	Peru_Ollantaytambo_LIP.Capt	orange1	13	371225	3607	102915	415596	372619	4647	80193	80323	NA	NA	NA	NA	NA	NA	NA	NA
Mbuti	A460	SC-05	SouthPatagonia_MH	Chile_WesternArchipelago_Ayayema_5100BP.SG	blue3	23	California_SouthernChannelIslands_LH	USA_CA_SanClemente_900BP.SG	violet	7	359272	3431	104717	843845	362226	4198	86291	166424	386857	4153	93157	3869846	388994	4308	90305	1220068
Mbuti	A460	I1357	SouthPatagonia_MH	Chile_WesternArchipelago_Ayayema_5100BP.SG	blue3	23	CentralAndes_MiddleHorizon_LH	Peru_Laramate_900BP.Capt	orange2	8	368749	3731	98837	487315	371264	4815	77102	93516	NA	NA	NA	NA	NA	NA	NA	NA
Mbuti	A460	TOY-1-1	SouthPatagonia_MH	Chile_WesternArchipelago_Ayayema_5100BP.SG	blue3	23	CentralAndes_LateIntermediate_LH	Peru_Torontoy_500BP.Capt	orange1	12	37223	3534	105325	534765	371549	4578	81167	103741	NA	NA	NA	NA	NA	NA	NA	NA
Mbuti	A460	I2262	SouthPatagonia_MH	Chile_WesternArchipelago_Ayayema_5100BP.SG	blue3	23	CentralAndes_EarlyIntermediate_LH	Peru_EIP_Moche.Capt	darkorange1	6	372016	4738	78525	72856	NA	NA	NA	NA	NA	NA	NA	NA	NA	NA	NA	NA
Mbuti	A460	I2537	SouthPatagonia_MH	Chile_WesternArchipelago_Ayayema_5100BP.SG	blue3	23	CentralAndes_LateIntermediate_LH	Chile_PicaOcho_700BP.Capt	orange1	3	371821	3547	104824	363349	37164	4996	74382	68785	NA	NA	NA	NA	NA	NA	NA	NA
Mbuti	A460	AR0162	SouthPatagonia_MH	Chile_WesternArchipelago_Ayayema_5100BP.SG	blue3	23	Uspallata	LH-LF|LH-F	darkorange4	21	371549	3618	102.69	566836	375408	4448	84405	111922	400038	4029	99282	2523946	401705	4234	94866	799264
Mbuti	A460	I2545	SouthPatagonia_MH	Chile_WesternArchipelago_Ayayema_5100BP.SG	blue3	23	CentralAndes_LateHorizon_LH	Peru_LH_Inca.Capt	darkorange2	1	369053	4214	87587	132897	NA	NA	NA	NA	NA	NA	NA	NA	NA	NA	NA	NA
Mbuti	A460	SC-03	SouthPatagonia_MH	Chile_WesternArchipelago_Ayayema_5100BP.SG	blue3	23	California_SouthernChannelIslands_LH	USA_CA_SanClemente_900BP.SG	violet	7	353765	3747	94416	320594	358186	5084	70453	62404	383777	4443	86378	1378353	386733	4681	82614	427394
Mbuti	A460	I1396	SouthPatagonia_MH	Chile_WesternArchipelago_Ayayema_5100BP.SG	blue3	23	CentralAndes_LateIntermediate_LH	Peru_LIP_Pacapaccari_600BP.Capt	orange1	8	366401	5431	67468	51270	NA	NA	NA	NA	NA	NA	NA	NA	NA	NA	NA	NA
Mbuti	A460	OTT-1144	SouthPatagonia_MH	Chile_WesternArchipelago_Ayayema_5100BP.SG	blue3	23	CentralAndes_LateIntermediate_LH	Peru_Ollantaytambo_LIP.Capt	orange1	13	367887	3553	103543	571382	367887	4468	82335	110544	NA	NA	NA	NA	NA	NA	NA	NA
Mbuti	A460	I0045	SouthPatagonia_MH	Chile_WesternArchipelago_Ayayema_5100BP.SG	blue3	23	CentralAndes_EarlyIntermediate_LH	Peru_Lima_EIP_1450BP.Capt	darkorange1	2	37076	3942	94057	199646	NA	NA	NA	NA	NA	NA	NA	NA	NA	NA	NA	NA
Mbuti	A460	I2237	SouthPatagonia_MH	Chile_WesternArchipelago_Ayayema_5100BP.SG	blue3	23	CentralAndes_EarlyIntermediate_LH	Peru_ElBrujo_EIP_1300BP.Capt	darkorange1	1	37334	3773	98945	255942	370944	5352	69312	49039	NA	NA	NA	NA	NA	NA	NA	NA
Mbuti	A460	I1742	SouthPatagonia_MH	Chile_WesternArchipelago_Ayayema_5100BP.SG	blue3	23	CentralAndes_MiddleHorizon_LH	Peru_Laramate_900BP.Capt	orange2	8	371417	3669	101229	326087	370683	5035	73628	61639	NA	NA	NA	NA	NA	NA	NA	NA
Mbuti	A460	I11288	SouthPatagonia_MH	Chile_WesternArchipelago_Ayayema_5100BP.SG	blue3	23	California_SouthernMainland_MH	USA_CA_Goleta_4700BP.Capt	palevioletred3	21	366604	3719	98588	545531	366488	4464	82099	104044	NA	NA	NA	NA	NA	NA	NA	NA
Mbuti	A460	I1356	SouthPatagonia_MH	Chile_WesternArchipelago_Ayayema_5100BP.SG	blue3	23	CentralAndes_LateIntermediate_LH	Peru_LIP_Pacapaccari_600BP.Capt	orange1	8	371087	3584	103554	452397	369113	4747	77764	85548	NA	NA	NA	NA	NA	NA	NA	NA
Mbuti	A460	SN-39	SouthPatagonia_MH	Chile_WesternArchipelago_Ayayema_5100BP.SG	blue3	23	California_SouthernChannelIslands_MH	USA_CA_SanNicolas_4800BP.SG	violet	23	356933	4145	86117	152281	NA	NA	NA	NA	387454	4528	85574	645576	389802	4977	78323	204682
Mbuti	A460	I21250	SouthPatagonia_MH	Chile_WesternArchipelago_Ayayema_5100BP.SG	blue3	23	California_SouthernMainland_LH	USA_CA_Goleta_900BP.Capt	palevioletred3	5	362411	3597	100743	519299	362878	4696	77275	98952	NA	NA	NA	NA	NA	NA	NA	NA
Mbuti	A460	AR0505	SouthPatagonia_MH	Chile_WesternArchipelago_Ayayema_5100BP.SG	blue3	23	Uspallata	LH-MF|LH-F	goldenrod1	21	369678	3484	106.1	835212	372888	4255	87629	164520	397289	4351	91304	3846633	399981	4538	88134	1208157
Mbuti	A460	I0038	SouthPatagonia_MH	Chile_WesternArchipelago_Ayayema_5100BP.SG	blue3	23	CentralAndes_EH	Peru_Lauricocha_8600BP.Capt	darkorange4	22	363333	3634	99976	718216	367056	4424	82.97	139752	NA	NA	NA	NA	NA	NA	NA	NA
Mbuti	A460	KMA-28-1	SouthPatagonia_MH	Chile_WesternArchipelago_Ayayema_5100BP.SG	blue3	23	CentralAndes_LateHorizon_LH	Peru_Kanamarka1_LH.Capt	darkorange2	5	368094	3498	105.24	653574	368637	4365	84449	127225	NA	NA	NA	NA	NA	NA	NA	NA
Mbuti	A460	I8575	SouthPatagonia_MH	Chile_WesternArchipelago_Ayayema_5100BP.SG	blue3	23	SouthPatagonia_LH	Chile_SouthernContinent_Aonikenk_400BP.Capt	blue1	7	380123	3875	98108	363453	382245	5279	72409	69861	NA	NA	NA	NA	NA	NA	NA	NA
Mbuti	A460	I11295	SouthPatagonia_MH	Chile_WesternArchipelago_Ayayema_5100BP.SG	blue3	23	California_SouthernMainland_LH	USA_CA_Goleta_400BP.Capt	palevioletred3	6	366619	3586	102239	560417	363999	4581	79461	107219	NA	NA	NA	NA	NA	NA	NA	NA
Mbuti	A460	I12376	SouthPatagonia_MH	Chile_WesternArchipelago_Ayayema_5100BP.SG	blue3	23	Pampa_LH	Argentina_LagunaToro_2400BP.Capt	lightblue	2	375498	4252	88317	125802	NA	NA	NA	NA	NA	NA	NA	NA	NA	NA	NA	NA
Mbuti	A460	SN-52	SouthPatagonia_MH	Chile_WesternArchipelago_Ayayema_5100BP.SG	blue3	23	California_SouthernChannelIslands_LH	USA_CA_SanNicolas_1600BP.SG	violet	8	361625	4081	88614	148071	NA	NA	NA	NA	389554	4297	90664	617060	389531	4794	81246	191661
Mbuti	A460	I12366	SouthPatagonia_MH	Chile_WesternArchipelago_Ayayema_5100BP.SG	blue3	23	SouthPatagonia_LH	Argentina_NorthTierradelFuego_Selknam_500BP.Capt	blue1	5	388565	3773	102997	392397	391138	4992	78352	74943	NA	NA	NA	NA	NA	NA	NA	NA
Mbuti	A460	I17113	SouthPatagonia_MH	Chile_WesternArchipelago_Ayayema_5100BP.SG	blue3	23	SouthernNorthAmerica_LH	Mexico_Tayopa_1000BP.Capt	blueviolet	5	355915	4401	80871	93505	NA	NA	NA	NA	NA	NA	NA	NA	NA	NA	NA	NA
Mbuti	A460	I0039	SouthPatagonia_MH	Chile_WesternArchipelago_Ayayema_5100BP.SG	blue3	23	CentralAndes_MH	Peru_Lauricocha_3500BP.Capt	orange4	23	361035	3682	98065	434359	359008	4721	76042	83675	NA	NA	NA	NA	NA	NA	NA	NA
Mbuti	A460	I15174	SouthPatagonia_MH	Chile_WesternArchipelago_Ayayema_5100BP.SG	blue3	23	California_Central_LH	USA_CA_CalaverasCounty_600BP.Capt	palevioletred1	7	368245	3696	99.63	484337	367503	4588	80095	92922	NA	NA	NA	NA	NA	NA	NA	NA
Mbuti	A460	AR0152	SouthPatagonia_MH	Chile_WesternArchipelago_Ayayema_5100BP.SG	blue3	23	Uspallata	LH-HG|LH-HG	darkorange4	23	373482	4514	82.74	109981	NA	NA	NA	NA	400562	4418	90662	542958	397889	49	81203	174548
Mbuti	A460	I11968	SouthPatagonia_MH	Chile_WesternArchipelago_Ayayema_5100BP.SG	blue3	23	California_NorthernChannelIslands_LH	USA_CA_SantaRosa_3200BP.Capt	violet	5	363658	3698	98337	364685	370139	5019	73752	70139	NA	NA	NA	NA	NA	NA	NA	NA
Mbuti	A460	I1863	SouthPatagonia_MH	Chile_WesternArchipelago_Ayayema_5100BP.SG	blue3	23	SouthernNorthAmerica_LH	Mexico_CoyoteCave_2750BP.Capt	blueviolet	8	358812	5563	64505	48425	NA	NA	NA	NA	NA	NA	NA	NA	NA	NA	NA	NA
Mbuti	A460	LAR002	SouthPatagonia_MH	Chile_WesternArchipelago_Ayayema_5100BP.SG	blue3	23	Brazil_MH	Brazil_Laranjal_6800BP.Capt	palegreen4	23	364425	3732	97654	217041	36822	5841	63045	41484	NA	NA	NA	NA	NA	NA	NA	NA
Mbuti	Aconcagua	Ala1	QhapaqHucha_Inka_LH	Argentina_Aconcagua_Inca_500BP.SG	brown3	9	California_Central_LH	USA_CA_SanFranciscoBay_300BP.SG	palevioletred1	5	366036	3998	91561	248480	373855	587	63692	49946	390873	431	90.68	1149934	391134	4533	86294	374620
Mbuti	Aconcagua	I11969	QhapaqHucha_Inka_LH	Argentina_Aconcagua_Inca_500BP.SG	brown3	9	California_NorthernChannelIslands_LH	USA_CA_SantaRosa_3200BP.Capt	violet	5	369985	358	103336	566602	371474	4373	84954	108900	NA	NA	NA	NA	NA	NA	NA	NA
Mbuti	Aconcagua	I1864	QhapaqHucha_Inka_LH	Argentina_Aconcagua_Inca_500BP.SG	brown3	9	SouthernNorthAmerica_LH	Mexico_CoyoteCave_950BP.Capt	blueviolet	7	365759	3601	101565	309350	360593	5091	70833	58095	NA	NA	NA	NA	NA	NA	NA	NA
Mbuti	Aconcagua	KMA-15A-1	QhapaqHucha_Inka_LH	Argentina_Aconcagua_Inca_500BP.SG	brown3	9	CentralAndes_LateHorizon_LH	Peru_Kanamarka1_LH.Capt	darkorange2	5	381358	3421	111465	614094	389009	4443	87552	119306	NA	NA	NA	NA	NA	NA	NA	NA
Mbuti	Aconcagua	CT-01	QhapaqHucha_Inka_LH	Argentina_Aconcagua_Inca_500BP.SG	brown3	9	California_SouthernChannelIslands_LH	USA_CA_SanCatalina_400BP.SG	violet	6	369566	3442	107.36	724709	367991	4307	85438	143311	395739	4045	97836	3193859	395582	4205	94076	1015039
Mbuti	Aconcagua	I0755	QhapaqHucha_Inka_LH	Argentina_Aconcagua_Inca_500BP.SG	brown3	9	California_SouthernChannelIslands_LH	USA_CA_SanClemente_500BP.Capt	violet	9	366879	3671	99949	311759	365621	4912	74.43	60446	NA	NA	NA	NA	NA	NA	NA	NA
Mbuti	Aconcagua	I11295	QhapaqHucha_Inka_LH	Argentina_Aconcagua_Inca_500BP.SG	brown3	9	California_SouthernMainland_LH	USA_CA_Goleta_400BP.Capt	palevioletred3	6	372021	3605	103209	509183	370284	4637	79852	97424	NA	NA	NA	NA	NA	NA	NA	NA
Mbuti	Aconcagua	I0756	QhapaqHucha_Inka_LH	Argentina_Aconcagua_Inca_500BP.SG	brown3	9	California_SouthernChannelIslands_LH	USA_CA_SanClemente_500BP.Capt	violet	9	361912	3439	105233	545724	361634	4497	80.41	105980	NA	NA	NA	NA	NA	NA	NA	NA
Mbuti	Aconcagua	I12367	QhapaqHucha_Inka_LH	Argentina_Aconcagua_Inca_500BP.SG	brown3	9	SouthPatagonia_LH	Argentina_NorthTierradelFuego_Selknam_500BP.Capt	blue1	5	377942	3748	100847	236690	383544	5968	64264	45050	NA	NA	NA	NA	NA	NA	NA	NA
Mbuti	Aconcagua	Lapa25	QhapaqHucha_Inka_LH	Argentina_Aconcagua_Inca_500BP.SG	brown3	9	Brazil_EH	Brazil_LapaDoSanto_9600BP.Capt	palegreen1	21	367043	3453	106283	359726	362388	4928	73.54	68301	NA	NA	NA	NA	NA	NA	NA	NA
Mbuti	Aconcagua	MX-01	QhapaqHucha_Inka_LH	Argentina_Aconcagua_Inca_500BP.SG	brown3	9	California_Baja_LH	Mexico_Baja_IronSprings_Unknown.SG	palevioletred1	2	366365	5093	71939	64016	NA	NA	NA	NA	393146	4434	88676	277681	394854	5369	73543	89659
Mbuti	Aconcagua	Sumidouro4	QhapaqHucha_Inka_LH	Argentina_Aconcagua_Inca_500BP.SG	brown3	9	Brazil_EH	Brazil_Sumidouro_10100BP.SG	palegreen1	22	358692	3761	95367	297091	363301	5304	68502	58506	387442	418	92695	1273034	390428	446	87543	410502
Mbuti	Aconcagua	I0758	QhapaqHucha_Inka_LH	Argentina_Aconcagua_Inca_500BP.SG	brown3	9	California_SouthernChannelIslands_LH	USA_CA_SanClemente_500BP.Capt	violet	9	363246	3511	103457	475456	366328	4535	80778	92097	NA	NA	NA	NA	NA	NA	NA	NA
Mbuti	Aconcagua	I11288	QhapaqHucha_Inka_LH	Argentina_Aconcagua_Inca_500BP.SG	brown3	9	California_SouthernMainland_MH	USA_CA_Goleta_4700BP.Capt	palevioletred3	21	37407	3485	107333	496170	372904	4568	81625	94703	NA	NA	NA	NA	NA	NA	NA	NA
Mbuti	Aconcagua	I15172	QhapaqHucha_Inka_LH	Argentina_Aconcagua_Inca_500BP.SG	brown3	9	California_Central_LH	USA_CA_CalaverasCounty_600BP.Capt	palevioletred1	7	369466	4684	78885	90802	NA	NA	NA	NA	NA	NA	NA	NA	NA	NA	NA	NA
Mbuti	Aconcagua	AM74	QhapaqHucha_Inka_LH	Argentina_Aconcagua_Inca_500BP.SG	brown3	9	SouthPatagonia_LH	Chile_StraitOfMagellan_Kaweskar_100BP.SG	blue1	8	369954	3689	100276	250752	37515	5552	67576	48061	398844	4043	98662	1100613	401798	4347	92424	337578
Mbuti	Aconcagua	I2705	QhapaqHucha_Inka_LH	Argentina_Aconcagua_Inca_500BP.SG	brown3	9	California_NorthernChannelIslands_LH	USA_CA_SantaRosa_300BP.Capt	violet	4	371078	3593	103265	465415	370539	4729	78.35	88002	NA	NA	NA	NA	NA	NA	NA	NA
Mbuti	Aconcagua	AR0151	QhapaqHucha_Inka_LH	Argentina_Aconcagua_Inca_500BP.SG	brown3	9	Uspallata	LH-HG|LH-HG	darkorange4	23	376692	3876	97188	251730	374757	5536	67695	50775	401235	4469	89775	1198957	400664	467	85803	388508
Mbuti	Aconcagua	I0044	QhapaqHucha_Inka_LH	Argentina_Aconcagua_Inca_500BP.SG	brown3	9	CentralAndes_LateIntermediate_LH	Peru_Lima_LIP_650BP.Capt	orange1	6	379825	3488	108905	638751	382182	4392	87025	124457	NA	NA	NA	NA	NA	NA	NA	NA
Mbuti	Aconcagua	I11289	QhapaqHucha_Inka_LH	Argentina_Aconcagua_Inca_500BP.SG	brown3	9	California_SouthernMainland_MH	USA_CA_Goleta_4700BP.Capt	palevioletred3	21	374488	421	88945	169893	NA	NA	NA	NA	NA	NA	NA	NA	NA	NA	NA	NA
Mbuti	Aconcagua	I2264	QhapaqHucha_Inka_LH	Argentina_Aconcagua_Inca_500BP.SG	brown3	9	CentralAndes_LateIntermediate_LH	Peru_Highlands_LIP_Chimu.Capt	orange1	5	386016	356	108428	470597	387241	4548	85154	90352	NA	NA	NA	NA	NA	NA	NA	NA
Mbuti	Aconcagua	I1867	QhapaqHucha_Inka_LH	Argentina_Aconcagua_Inca_500BP.SG	brown3	9	SouthernNorthAmerica_LH	Mexico_SanLorenzo_700BP.Capt	blueviolet	6	339333	4986	68057	57810	NA	NA	NA	NA	NA	NA	NA	NA	NA	NA	NA	NA
Mbuti	Aconcagua	I12366	QhapaqHucha_Inka_LH	Argentina_Aconcagua_Inca_500BP.SG	brown3	9	SouthPatagonia_LH	Argentina_NorthTierradelFuego_Selknam_500BP.Capt	blue1	5	379478	3599	105428	358033	382688	5135	74.53	68348	NA	NA	NA	NA	NA	NA	NA	NA
Mbuti	Aconcagua	I2707	QhapaqHucha_Inka_LH	Argentina_Aconcagua_Inca_500BP.SG	brown3	9	California_NorthernChannelIslands_LH	USA_CA_SantaRosa_300BP.Capt	violet	4	373006	355	105085	543922	372663	4483	83127	104117	NA	NA	NA	NA	NA	NA	NA	NA
Mbuti	Aconcagua	I14825	QhapaqHucha_Inka_LH	Argentina_Aconcagua_Inca_500BP.SG	brown3	9	California_SouthernMainland_LH	USA_CA_Malibu_3400BP.Capt	palevioletred3	3	371374	372	99.82	216784	375697	5804	64728	40963	NA	NA	NA	NA	NA	NA	NA	NA
Mbuti	Aconcagua	I3443	QhapaqHucha_Inka_LH	Argentina_Aconcagua_Inca_500BP.SG	brown3	9	CentralAmerica_EH	Belize_9400BP.Capt	mediumvioletred	21	377086	3868	97494	257945	375186	5394	69555	49409	NA	NA	NA	NA	NA	NA	NA	NA
Mbuti	Aconcagua	Lapa24	QhapaqHucha_Inka_LH	Argentina_Aconcagua_Inca_500BP.SG	brown3	9	Brazil_EH	Brazil_LapaDoSanto_9200BP.Capt	palegreen1	21	366208	3609	101481	438326	364946	4781	76337	83816	NA	NA	NA	NA	NA	NA	NA	NA
Mbuti	Aconcagua	I2252	QhapaqHucha_Inka_LH	Argentina_Aconcagua_Inca_500BP.SG	brown3	9	CentralAndes_MiddleHorizon_LH	Peru_Highlands_Chinchawas_MH.Capt	orange2	7	39008	3763	103658	242581	386264	5635	68548	46130	NA	NA	NA	NA	NA	NA	NA	NA
Mbuti	Aconcagua	I1357	QhapaqHucha_Inka_LH	Argentina_Aconcagua_Inca_500BP.SG	brown3	9	CentralAndes_MiddleHorizon_LH	Peru_Laramate_900BP.Capt	orange2	8	381628	3602	105962	441986	383233	4769	80366	84810	NA	NA	NA	NA	NA	NA	NA	NA
Mbuti	Aconcagua	SN-03	QhapaqHucha_Inka_LH	Argentina_Aconcagua_Inca_500BP.SG	brown3	9	California_SouthernChannelIslands_LH	USA_CA_SanNicolas_1600BP.SG	violet	8	375355	4239	88554	161439	NA	NA	NA	NA	397724	4326	91931	699952	397447	4587	86642	226563
Mbuti	Aconcagua	SHN-492	QhapaqHucha_Inka_LH	Argentina_Aconcagua_Inca_500BP.SG	brown3	9	CentralAndes_LateHorizon_LH	Peru_Sacsahuaman3_LH.Capt	darkorange2	14	379146	3534	107275	406685	381002	4827	78934	78203	NA	NA	NA	NA	NA	NA	NA	NA
Mbuti	Aconcagua	SC-04	QhapaqHucha_Inka_LH	Argentina_Aconcagua_Inca_500BP.SG	brown3	9	California_SouthernChannelIslands_LH	USA_CA_SanClemente_900BP.SG	violet	7	362003	4244	85292	137591	NA	NA	NA	NA	39228	4296	91314	594726	397768	4718	84306	191993
Mbuti	Aconcagua	KMA-19-1	QhapaqHucha_Inka_LH	Argentina_Aconcagua_Inca_500BP.SG	brown3	9	CentralAndes_LateHorizon_LH	Peru_Kanamarka3_LH.Capt	darkorange2	7	376459	3503	107465	594696	378368	4416	85689	115237	NA	NA	NA	NA	NA	NA	NA	NA
Mbuti	Aconcagua	I21452	QhapaqHucha_Inka_LH	Argentina_Aconcagua_Inca_500BP.SG	brown3	9	California_SouthernMainland_LH	USA_CA_Goleta_900BP.Capt	palevioletred3	5	374763	3703	101199	343387	372994	5058	73744	65658	NA	NA	NA	NA	NA	NA	NA	NA
Mbuti	Aconcagua	2417J	QhapaqHucha_Inka_LH	Argentina_Aconcagua_Inca_500BP.SG	brown3	9	CentralAmerica_LH	Mexico_SierraGorda_Postclassic.SG	darkviolet	3	371625	3343	111154	549411	369934	4472	82721	108306	395366	3905	101243	2505571	395492	4062	97359	794584
Mbuti	Aconcagua	I7086	QhapaqHucha_Inka_LH	Argentina_Aconcagua_Inca_500BP.SG	brown3	9	Pampa_MH	Argentina_ArroyoSeco2_7700BP.Capt	lightblue	22	367635	4998	73563	66664	NA	NA	NA	NA	NA	NA	NA	NA	NA	NA	NA	NA
Mbuti	Aconcagua	AR0526	QhapaqHucha_Inka_LH	Argentina_Aconcagua_Inca_500BP.SG	brown3	9	Uspallata	LH-MF|LH-F	goldenrod1	21	375141	3602	104138	619705	381275	4594	82989	122090	402728	4112	97941	2739447	404077	4279	94441	871192
Mbuti	Aconcagua	I2237	QhapaqHucha_Inka_LH	Argentina_Aconcagua_Inca_500BP.SG	brown3	9	CentralAndes_EarlyIntermediate_LH	Peru_ElBrujo_EIP_1300BP.Capt	darkorange1	1	386758	378	102321	233270	383464	5513	69552	44710	NA	NA	NA	NA	NA	NA	NA	NA
Mbuti	Aconcagua	I8351	QhapaqHucha_Inka_LH	Argentina_Aconcagua_Inca_500BP.SG	brown3	9	Pampa_LH	Argentina_LagunaChica_1600BP.Capt	lightblue	1	37733	3581	105358	404816	376005	4903	76692	75689	NA	NA	NA	NA	NA	NA	NA	NA
Mbuti	Aconcagua	AR0519	QhapaqHucha_Inka_LH	Argentina_Aconcagua_Inca_500BP.SG	brown3	9	Uspallata	LH-MF|LH-F	goldenrod1	21	377613	3576	105603	702831	380456	4376	86942	138894	404249	4167	97009	3172659	403924	4294	94063	1010328
Mbuti	Aconcagua	I2710	QhapaqHucha_Inka_LH	Argentina_Aconcagua_Inca_500BP.SG	brown3	9	California_NorthernChannelIslands_MH	USA_CA_SantaRosa_7400BP.Capt	violet	21	376749	4088	92162	181870	NA	NA	NA	NA	NA	NA	NA	NA	NA	NA	NA	NA
Mbuti	Aconcagua	I14826	QhapaqHucha_Inka_LH	Argentina_Aconcagua_Inca_500BP.SG	brown3	9	California_SouthernMainland_LH	USA_CA_Malibu_3400BP.Capt	palevioletred3	3	369141	4362	84629	124004	NA	NA	NA	NA	NA	NA	NA	NA	NA	NA	NA	NA
Mbuti	Aconcagua	B-03	QhapaqHucha_Inka_LH	Argentina_Aconcagua_Inca_500BP.SG	brown3	9	California_Baja_LH	Mexico_Pericues_Unknown.SG	palevioletred1	4	368435	4042	91144	180386	365938	6011	60874	35534	391851	4357	89928	772712	391881	4809	81.49	245313
Mbuti	Aconcagua	LAR001	QhapaqHucha_Inka_LH	Argentina_Aconcagua_Inca_500BP.SG	brown3	9	Brazil_MH	Brazil_Laranjal_6600BP.Capt	palegreen4	22	370506	3765	98413	265693	370797	5372	69025	50958	NA	NA	NA	NA	NA	NA	NA	NA
Mbuti	Aconcagua	I12942	QhapaqHucha_Inka_LH	Argentina_Aconcagua_Inca_500BP.SG	brown3	9	SouthPatagonia_LH	Argentina_BeagleChannel_Yamana_100BP.Capt	blue1	1	377993	3904	96822	189869	379074	632	59.98	36054	NA	NA	NA	NA	NA	NA	NA	NA
Mbuti	Aconcagua	I0039	QhapaqHucha_Inka_LH	Argentina_Aconcagua_Inca_500BP.SG	brown3	9	CentralAndes_MH	Peru_Lauricocha_3500BP.Capt	orange4	23	375479	3608	104073	394624	379807	4741	80109	76005	NA	NA	NA	NA	NA	NA	NA	NA
Mbuti	Aconcagua	I2243	QhapaqHucha_Inka_LH	Argentina_Aconcagua_Inca_500BP.SG	brown3	9	CentralAndes_MiddleHorizonLateIntermeditae_LH	Peru_MH_LIP_Lambayeque.Capt	darkorange3	2	392102	5508	71189	48618	NA	NA	NA	NA	NA	NA	NA	NA	NA	NA	NA	NA
Mbuti	Aconcagua	PS-17	QhapaqHucha_Inka_LH	Argentina_Aconcagua_Inca_500BP.SG	brown3	9	California_SouthernMainland_LH	USA_CA_PointSal_1500BP.SG	palevioletred3	2	NA	NA	NA	NA	NA	NA	NA	NA	38683	5199	74404	135231	387189	6458	59957	43492
Mbuti	Aconcagua	SN-16	QhapaqHucha_Inka_LH	Argentina_Aconcagua_Inca_500BP.SG	brown3	9	California_SouthernChannelIslands_LH	USA_CA_SanNicolas_1600BP.SG	violet	8	371096	4413	84087	83044	NA	NA	NA	NA	392245	4145	94631	340148	395924	4931	80292	106657
Mbuti	Aconcagua	SN-01	QhapaqHucha_Inka_LH	Argentina_Aconcagua_Inca_500BP.SG	brown3	9	California_SouthernChannelIslands_LH	USA_CA_SanNicolas_1600BP.SG	violet	8	364382	5019	72594	65718	NA	NA	NA	NA	393013	4369	89.96	272972	393955	5403	72912	86671
Mbuti	Aconcagua	E8CdV	QhapaqHucha_Inka_LH	Argentina_Aconcagua_Inca_500BP.SG	brown3	9	CentralAmerica_LH	Mexico_CanadaDeLaVirgen_MidClassic.SG	darkviolet	2	36648	3943	92934	201374	371689	6314	58865	39355	392031	4123	95092	1067516	390106	4275	91253	332943
Mbuti	Aconcagua	SHN-355	QhapaqHucha_Inka_LH	Argentina_Aconcagua_Inca_500BP.SG	brown3	9	CentralAndes_LateHorizon_LH	Peru_Sacsahuaman2_LH.Capt	darkorange2	13	383596	3598	106618	498449	385637	4698	82.09	97070	NA	NA	NA	NA	NA	NA	NA	NA
Mbuti	Aconcagua	CCA-5-1	QhapaqHucha_Inka_LH	Argentina_Aconcagua_Inca_500BP.SG	brown3	9	CentralAndes_LateHorizon_LH	Peru_CasaConcha2_LH.Capt	darkorange2	4	382686	3464	110479	579556	37891	4489	84406	112764	NA	NA	NA	NA	NA	NA	NA	NA
Mbuti	Aconcagua	I12356	QhapaqHucha_Inka_LH	Argentina_Aconcagua_Inca_500BP.SG	brown3	9	SouthPatagonia_LH	Argentina_MitrePeninsula_Haush_400BP.Capt	blue1	3	372442	366	101751	400861	369799	4992	74073	75583	NA	NA	NA	NA	NA	NA	NA	NA
Mbuti	Aconcagua	PS-09	QhapaqHucha_Inka_LH	Argentina_Aconcagua_Inca_500BP.SG	brown3	9	California_SouthernMainland_LH	USA_CA_PointSal_1500BP.SG	palevioletred3	2	362596	51	71102	61809	NA	NA	NA	NA	392615	4382	89588	261863	398048	5377	74024	82086
Mbuti	Aconcagua	I2263	QhapaqHucha_Inka_LH	Argentina_Aconcagua_Inca_500BP.SG	brown3	9	CentralAndes_EarlyIntermediate_LH	Peru_ElBrujo_EIP_1300BP.Capt	darkorange1	1	387032	3826	101145	281650	385366	5514	69885	53332	NA	NA	NA	NA	NA	NA	NA	NA
Mbuti	Aconcagua	SM-02	QhapaqHucha_Inka_LH	Argentina_Aconcagua_Inca_500BP.SG	brown3	9	California_NorthernChannelIslands_LH	USA_CA_SanMiguel_650BP.SG	violet	1	37369	357	104666	652747	374115	4405	84923	128358	40167	4073	98623	2851776	401532	425	94479	903676
Mbuti	Aconcagua	SN-53	QhapaqHucha_Inka_LH	Argentina_Aconcagua_Inca_500BP.SG	brown3	9	California_SouthernChannelIslands_LH	USA_CA_SanNicolas_1600BP.SG	violet	8	362357	3886	93257	183294	362899	6159	58919	35912	395909	4247	93211	761019	397513	4653	85433	238356
Mbuti	Aconcagua	I15175	QhapaqHucha_Inka_LH	Argentina_Aconcagua_Inca_500BP.SG	brown3	9	California_Central_LH	USA_CA_CalaverasCounty_600BP.Capt	palevioletred1	7	372972	3573	104378	505171	371558	4556	81549	97062	NA	NA	NA	NA	NA	NA	NA	NA
Mbuti	Aconcagua	I0237	QhapaqHucha_Inka_LH	Argentina_Aconcagua_Inca_500BP.SG	brown3	9	CentralAndes_MiddleHorizon_LH	Peru_Laramate_900BP.Capt	orange2	8	378271	3891	97209	255714	377353	5778	65305	47635	NA	NA	NA	NA	NA	NA	NA	NA
Mbuti	Aconcagua	I15170	QhapaqHucha_Inka_LH	Argentina_Aconcagua_Inca_500BP.SG	brown3	9	California_Central_LH	USA_CA_CalaverasCounty_1500BP.Capt	palevioletred1	8	367673	3535	104007	486989	36562	4469	81815	93615	NA	NA	NA	NA	NA	NA	NA	NA
Mbuti	Aconcagua	Lapa22	QhapaqHucha_Inka_LH	Argentina_Aconcagua_Inca_500BP.SG	brown3	9	Brazil_EH	Brazil_LapaDoSanto_9600BP.Capt	palegreen1	21	368783	3631	101559	286391	369195	5088	72559	53841	NA	NA	NA	NA	NA	NA	NA	NA
Mbuti	Aconcagua	I12360	QhapaqHucha_Inka_LH	Argentina_Aconcagua_Inca_500BP.SG	brown3	9	SouthPatagonia_LH	Argentina_MitrePeninsula_Haush_400BP.Capt	blue1	3	372698	4846	76911	69975	NA	NA	NA	NA	NA	NA	NA	NA	NA	NA	NA	NA
Mbuti	Aconcagua	I12362	QhapaqHucha_Inka_LH	Argentina_Aconcagua_Inca_500BP.SG	brown3	9	SouthPatagonia_MH	Argentina_NorthTierradelFuego_LaArcillosa2_5800BP.Capt	blue3	21	370595	3722	99576	500026	367337	4367	84115	95155	NA	NA	NA	NA	NA	NA	NA	NA
Mbuti	Aconcagua	I0750	QhapaqHucha_Inka_LH	Argentina_Aconcagua_Inca_500BP.SG	brown3	9	California_SouthernChannelIslands_LH	USA_CA_SanClemente_500BP.Capt	violet	9	365048	3614	101006	434619	364669	459	79448	84419	NA	NA	NA	NA	NA	NA	NA	NA
Mbuti	Aconcagua	I21250	QhapaqHucha_Inka_LH	Argentina_Aconcagua_Inca_500BP.SG	brown3	9	California_SouthernMainland_LH	USA_CA_Goleta_900BP.Capt	palevioletred3	5	371659	356	104393	472592	370792	4729	78409	89984	NA	NA	NA	NA	NA	NA	NA	NA
Mbuti	Aconcagua	I2557	QhapaqHucha_Inka_LH	Argentina_Aconcagua_Inca_500BP.SG	brown3	9	CentralAndes_EarlyIntermediate_LH	Peru_Ullujaya_EIP_1350BP.Capt	darkorange1	5	37833	3831	98744	267772	37159	5396	68864	50588	NA	NA	NA	NA	NA	NA	NA	NA
Mbuti	Aconcagua	I1356	QhapaqHucha_Inka_LH	Argentina_Aconcagua_Inca_500BP.SG	brown3	9	CentralAndes_LateIntermediate_LH	Peru_LIP_Pacapaccari_600BP.Capt	orange1	8	380838	3562	106919	411962	37859	4814	78638	77931	NA	NA	NA	NA	NA	NA	NA	NA
Mbuti	Aconcagua	I0752	QhapaqHucha_Inka_LH	Argentina_Aconcagua_Inca_500BP.SG	brown3	9	California_SouthernChannelIslands_LH	USA_CA_SanClemente_500BP.Capt	violet	9	362285	4078	88.83	148618	NA	NA	NA	NA	NA	NA	NA	NA	NA	NA	NA	NA
Mbuti	Aconcagua	PS-02	QhapaqHucha_Inka_LH	Argentina_Aconcagua_Inca_500BP.SG	brown3	9	California_SouthernMainland_LH	USA_CA_PointSal_1500BP.SG	palevioletred3	2	NA	NA	NA	NA	NA	NA	NA	NA	39213	4964	78991	113781	NA	NA	NA	NA
Mbuti	Aconcagua	AR0521	QhapaqHucha_Inka_LH	Argentina_Aconcagua_Inca_500BP.SG	brown3	9	Uspallata	LH-MF|LH-F	goldenrod1	21	374023	3493	107086	511016	378357	4669	81032	100368	401263	4021	99.78	2219555	403752	421	95897	702125
Mbuti	Aconcagua	KCA-1108	QhapaqHucha_Inka_LH	Argentina_Aconcagua_Inca_500BP.SG	brown3	9	CentralAndes_LateHorizon_LH	Peru_Kusicancha1_LH.Capt	darkorange2	8	380761	3527	107964	524031	384892	4386	87746	101046	NA	NA	NA	NA	NA	NA	NA	NA
Mbuti	Aconcagua	QKI-4	QhapaqHucha_Inka_LH	Argentina_Aconcagua_Inca_500BP.SG	brown3	9	CentralAndes_LateHorizon_LH	Peru_Qotakalli2_LH.Capt	darkorange2	11	379922	3524	107812	491951	377505	4564	82707	95409	NA	NA	NA	NA	NA	NA	NA	NA
Mbuti	Aconcagua	SN-10	QhapaqHucha_Inka_LH	Argentina_Aconcagua_Inca_500BP.SG	brown3	9	California_SouthernChannelIslands_LH	USA_CA_SanNicolas_1600BP.SG	violet	8	362759	4033	89947	170787	NA	NA	NA	NA	391847	4153	94351	704274	390751	4611	84738	221507
Mbuti	Aconcagua	AR0514	QhapaqHucha_Inka_LH	Argentina_Aconcagua_Inca_500BP.SG	brown3	9	Uspallata	LH-MF|LH-F	goldenrod1	21	378087	3584	105494	421591	380658	4753	80087	82881	40614	4207	96531	1835327	408726	4407	92741	583277
Mbuti	Aconcagua	I12359	QhapaqHucha_Inka_LH	Argentina_Aconcagua_Inca_500BP.SG	brown3	9	SouthPatagonia_LH	Argentina_MitrePeninsula_Haush_400BP.Capt	blue1	3	374037	3877	96.48	201133	375589	6194	60.64	37630	NA	NA	NA	NA	NA	NA	NA	NA
Mbuti	Aconcagua	QKI-21-1	QhapaqHucha_Inka_LH	Argentina_Aconcagua_Inca_500BP.SG	brown3	9	CentralAndes_LateHorizon_LH	Peru_Qotakalli1_LH.Capt	darkorange2	10	375697	4124	91.09	118207	NA	NA	NA	NA	NA	NA	NA	NA	NA	NA	NA	NA
Mbuti	Aconcagua	I8575	QhapaqHucha_Inka_LH	Argentina_Aconcagua_Inca_500BP.SG	brown3	9	SouthPatagonia_LH	Chile_SouthernContinent_Aonikenk_400BP.Capt	blue1	7	378828	372	101841	330243	380203	5313	71555	63409	NA	NA	NA	NA	NA	NA	NA	NA
Mbuti	Aconcagua	I2242	QhapaqHucha_Inka_LH	Argentina_Aconcagua_Inca_500BP.SG	brown3	9	CentralAndes_MiddleHorizonLateIntermeditae_LH	Peru_MH_LIP_ElBrujo_850BP.Capt	darkorange3	1	383517	372	103097	234882	384134	5466	70272	45069	NA	NA	NA	NA	NA	NA	NA	NA
Mbuti	Aconcagua	SC-06	QhapaqHucha_Inka_LH	Argentina_Aconcagua_Inca_500BP.SG	brown3	9	California_SouthernChannelIslands_LH	USA_CA_SanClemente_900BP.SG	violet	7	369776	4686	78916	115387	NA	NA	NA	NA	3982	4455	89378	484257	3996	4972	80372	153406
Mbuti	Aconcagua	I2262	QhapaqHucha_Inka_LH	Argentina_Aconcagua_Inca_500BP.SG	brown3	9	CentralAndes_EarlyIntermediate_LH	Peru_EIP_Moche.Capt	darkorange1	6	386525	5162	74877	66357	NA	NA	NA	NA	NA	NA	NA	NA	NA	NA	NA	NA
Mbuti	Aconcagua	I0978	QhapaqHucha_Inka_LH	Argentina_Aconcagua_Inca_500BP.SG	brown3	9	CentralAndes_MiddleHorizon_LH	Bolivia_MH_Tiwanaku.Capt	orange2	3	375696	4419	85.02	119800	NA	NA	NA	NA	NA	NA	NA	NA	NA	NA	NA	NA
Mbuti	Aconcagua	I2703	QhapaqHucha_Inka_LH	Argentina_Aconcagua_Inca_500BP.SG	brown3	9	California_NorthernChannelIslands_LH	USA_CA_SantaRosa_300BP.Capt	violet	4	372738	3547	105089	525357	375221	4551	82443	100386	NA	NA	NA	NA	NA	NA	NA	NA
Mbuti	Aconcagua	I12364	QhapaqHucha_Inka_LH	Argentina_Aconcagua_Inca_500BP.SG	brown3	9	SouthPatagonia_LH	Argentina_NorthTierradelFuego_Selknam_500BP.Capt	blue1	5	378676	4323	87587	130152	NA	NA	NA	NA	NA	NA	NA	NA	NA	NA	NA	NA
Mbuti	Aconcagua	SA5832	QhapaqHucha_Inka_LH	Argentina_Aconcagua_Inca_500BP.SG	brown3	9	SouthPatagonia_MH	Chile_PuntaSantaAna_7300BP.SG	blue3	22	371497	3614	102792	520677	37646	4595	81926	102014	398937	4048	98553	2369181	402014	4216	95348	745362
Mbuti	Aconcagua	TOY-1-1	QhapaqHucha_Inka_LH	Argentina_Aconcagua_Inca_500BP.SG	brown3	9	CentralAndes_LateIntermediate_LH	Peru_Torontoy_500BP.Capt	orange1	12	384637	3639	105706	485646	383987	4557	84269	94202	NA	NA	NA	NA	NA	NA	NA	NA
Mbuti	Aconcagua	Sumidouro7	QhapaqHucha_Inka_LH	Argentina_Aconcagua_Inca_500BP.SG	brown3	9	Brazil_EH	Brazil_Sumidouro_10100BP.SG	palegreen1	22	358809	379	94669	189066	363998	5781	62.97	37504	385034	4153	92.71	821813	390788	4526	86347	266639
Mbuti	Aconcagua	I0309	QhapaqHucha_Inka_LH	Argentina_Aconcagua_Inca_500BP.SG	brown3	9	Pampa_MH	Argentina_ArroyoSeco2_7700BP.Capt	lightblue	22	371858	3571	104137	353675	370195	5273	70207	67792	NA	NA	NA	NA	NA	NA	NA	NA
Mbuti	Aconcagua	LAR002	QhapaqHucha_Inka_LH	Argentina_Aconcagua_Inca_500BP.SG	brown3	9	Brazil_MH	Brazil_Laranjal_6800BP.Capt	palegreen4	23	372268	3952	94.19	198943	375187	6088	61.63	38063	NA	NA	NA	NA	NA	NA	NA	NA
Mbuti	Aconcagua	Lapa05	QhapaqHucha_Inka_LH	Argentina_Aconcagua_Inca_500BP.SG	brown3	9	Brazil_EH	Brazil_LapaDoSanto_9600BP.Capt	palegreen1	21	360429	4544	79327	93121	NA	NA	NA	NA	NA	NA	NA	NA	NA	NA	NA	NA
Mbuti	Aconcagua	Sumidouro6	QhapaqHucha_Inka_LH	Argentina_Aconcagua_Inca_500BP.SG	brown3	9	Brazil_EH	Brazil_Sumidouro_10100BP.SG	palegreen1	22	365962	351	104267	516306	368914	453	81439	101635	393175	4192	93784	2165026	394976	4384	90097	695106
Mbuti	Aconcagua	I1485	QhapaqHucha_Inka_LH	Argentina_Aconcagua_Inca_500BP.SG	brown3	9	CentralAndes_MiddleHorizon_LH	Peru_Laramate_900BP.Capt	orange2	8	381554	3745	101895	460679	381318	4855	78548	87745	NA	NA	NA	NA	NA	NA	NA	NA
Mbuti	Aconcagua	MIS7	QhapaqHucha_Inka_LH	Argentina_Aconcagua_Inca_500BP.SG	brown3	9	CentralAndes_MiddleHorizon_LH	Bolivia_MiraFlores_MH.Capt	orange2	4	380364	3453	110139	466345	37812	466	81149	89997	NA	NA	NA	NA	NA	NA	NA	NA
Mbuti	Aconcagua	I12358	QhapaqHucha_Inka_LH	Argentina_Aconcagua_Inca_500BP.SG	brown3	9	SouthPatagonia_LH	Argentina_MitrePeninsula_Haush_400BP.Capt	blue1	3	375994	3536	106325	502025	375015	4461	84057	96514	NA	NA	NA	NA	NA	NA	NA	NA
Mbuti	Aconcagua	PS-03	QhapaqHucha_Inka_LH	Argentina_Aconcagua_Inca_500BP.SG	brown3	9	California_SouthernMainland_LH	USA_CA_PointSal_1500BP.SG	palevioletred3	2	370714	4976	74498	71110	NA	NA	NA	NA	394903	4519	87382	300538	395627	5351	73931	96046
Mbuti	Aconcagua	SHN-212	QhapaqHucha_Inka_LH	Argentina_Aconcagua_Inca_500BP.SG	brown3	9	CentralAndes_LateHorizon_LH	Peru_Sacsahuaman1_LH.Capt	darkorange2	12	37869	4758	79585	79674	NA	NA	NA	NA	NA	NA	NA	NA	NA	NA	NA	NA
Mbuti	Aconcagua	I2560	QhapaqHucha_Inka_LH	Argentina_Aconcagua_Inca_500BP.SG	brown3	9	CentralAndes_MiddleHorizon_LH	Peru_Ullujaya_MH_950BP.Capt	orange2	9	382763	3768	101589	363668	386196	5147	75.03	68855	NA	NA	NA	NA	NA	NA	NA	NA
Mbuti	Aconcagua	BC25	QhapaqHucha_Inka_LH	Argentina_Aconcagua_Inca_500BP.SG	brown3	9	California_Baja_LH	Mexico_Pericues.SG	palevioletred1	3	355815	4428	80.36	93631	NA	NA	NA	NA	391185	4221	92677	396710	392224	4838	81067	119749
Mbuti	Aconcagua	AR0500and513	QhapaqHucha_Inka_LH	Argentina_Aconcagua_Inca_500BP.SG	brown3	9	Uspallata	LH-MF|LH-F	goldenrod1	21	373513	3746	99716	357358	378766	5202	72808	70294	400009	4243	94278	1570362	400798	4433	90422	497352
Mbuti	Aconcagua	AR0504	QhapaqHucha_Inka_LH	Argentina_Aconcagua_Inca_500BP.SG	brown3	9	Uspallata	LH-MF|LH-F	goldenrod1	21	372281	3531	105444	760450	375434	4217	89029	149891	399166	415	96195	3408512	399541	4277	93423	1082337
Mbuti	Aconcagua	OTT-1144	QhapaqHucha_Inka_LH	Argentina_Aconcagua_Inca_500BP.SG	brown3	9	CentralAndes_LateIntermediate_LH	Peru_Ollantaytambo_LIP.Capt	orange1	13	381703	3506	108864	518947	382034	4692	81418	100465	NA	NA	NA	NA	NA	NA	NA	NA
Mbuti	Aconcagua	AR0180	QhapaqHucha_Inka_LH	Argentina_Aconcagua_Inca_500BP.SG	brown3	9	Uspallata	LH-LF|LH-F	darkorange4	22	374852	5183	72326	73606	NA	NA	NA	NA	403134	4644	86811	343786	404849	5324	76039	111112
Mbuti	Aconcagua	I1754	QhapaqHucha_Inka_LH	Argentina_Aconcagua_Inca_500BP.SG	brown3	9	CentralChile_LH	Chile_Conchali_700BP.Capt	brown1	1	377451	3516	107339	552448	38061	4634	82131	106238	NA	NA	NA	NA	NA	NA	NA	NA
Mbuti	Aconcagua	333B	QhapaqHucha_Inka_LH	Argentina_Aconcagua_Inca_500BP.SG	brown3	9	CentralAmerica_LH	Mexico_SierraGorda_Postclassic.SG	darkviolet	3	37307	3435	108616	652499	379757	4271	88925	128289	400249	4045	98939	3008006	400115	4153	96342	951408
Mbuti	Aconcagua	I5456	QhapaqHucha_Inka_LH	Argentina_Aconcagua_Inca_500BP.SG	brown3	9	CentralAmerica_MH	Belize_7400BP.Capt	mediumvioletred	24	369766	3753	98514	284361	373055	5251	71.04	53892	NA	NA	NA	NA	NA	NA	NA	NA
Mbuti	Aconcagua	Enoque65	QhapaqHucha_Inka_LH	Argentina_Aconcagua_Inca_500BP.SG	brown3	9	Brazil_MH	Brazil_Enoque_3500BP.SG	palegreen4	21	NA	NA	NA	NA	NA	NA	NA	NA	3985	4965	80257	119471	NA	NA	NA	NA
Mbuti	Aconcagua	I11285	QhapaqHucha_Inka_LH	Argentina_Aconcagua_Inca_500BP.SG	brown3	9	California_SouthernMainland_LH	USA_CA_LakeCachuma_400BP.Capt	palevioletred3	4	370674	3735	99238	226785	369367	5594	66027	42008	NA	NA	NA	NA	NA	NA	NA	NA
Mbuti	Aconcagua	I2250	QhapaqHucha_Inka_LH	Argentina_Aconcagua_Inca_500BP.SG	brown3	9	CentralAndes_LateIntermediate_LH	Peru_Highlands_LIP_Chimu.Capt	orange1	5	384767	3983	96.6	175659	NA	NA	NA	NA	NA	NA	NA	NA	NA	NA	NA	NA
Mbuti	Aconcagua	CR-01	QhapaqHucha_Inka_LH	Argentina_Aconcagua_Inca_500BP.SG	brown3	9	California_NorthernChannelIslands_LH	USA_CA_SantaCruz_1000BP.SG	violet	2	370281	343	107946	740206	375822	4282	87768	146428	398872	4306	92632	3327842	399896	4462	89626	1064083
Mbuti	Aconcagua	KCA-1364	QhapaqHucha_Inka_LH	Argentina_Aconcagua_Inca_500BP.SG	brown3	9	CentralAndes_LateHorizon_LH	Peru_Kusicancha1_LH.Capt	darkorange2	8	383514	3367	113904	547522	383558	4271	89814	106316	NA	NA	NA	NA	NA	NA	NA	NA
Mbuti	Aconcagua	SN-52	QhapaqHucha_Inka_LH	Argentina_Aconcagua_Inca_500BP.SG	brown3	9	California_SouthernChannelIslands_LH	USA_CA_SanNicolas_1600BP.SG	violet	8	365263	414	88221	134559	NA	NA	NA	NA	392125	4222	92879	548830	391958	4752	82482	171298
Mbuti	Aconcagua	I0045	QhapaqHucha_Inka_LH	Argentina_Aconcagua_Inca_500BP.SG	brown3	9	CentralAndes_EarlyIntermediate_LH	Peru_Lima_EIP_1450BP.Capt	darkorange1	2	384646	4039	95241	181745	NA	NA	NA	NA	NA	NA	NA	NA	NA	NA	NA	NA
Mbuti	Aconcagua	I0238	QhapaqHucha_Inka_LH	Argentina_Aconcagua_Inca_500BP.SG	brown3	9	CentralAndes_EH	Peru_Lauricocha_8600BP.Capt	darkorange4	22	375878	5147	73024	53840	NA	NA	NA	NA	NA	NA	NA	NA	NA	NA	NA	NA
Mbuti	Aconcagua	SM-01	QhapaqHucha_Inka_LH	Argentina_Aconcagua_Inca_500BP.SG	brown3	9	California_NorthernChannelIslands_LH	USA_CA_SanMiguel_650BP.SG	violet	1	366242	49	74737	71178	NA	NA	NA	NA	400332	4467	89621	295841	4026	5373	74934	93152
Mbuti	Aconcagua	I17497	QhapaqHucha_Inka_LH	Argentina_Aconcagua_Inca_500BP.SG	brown3	9	CentralAndes_LateIntermediate_LH	Chile_LIP_Pukara_600BP.Capt	orange1	1	384129	4417	86975	112463	NA	NA	NA	NA	NA	NA	NA	NA	NA	NA	NA	NA
Mbuti	Aconcagua	I2539	QhapaqHucha_Inka_LH	Argentina_Aconcagua_Inca_500BP.SG	brown3	9	CentralAndes_MiddleHorizon_LH	Chile_CaletaHuelen_MH_1100BP.Capt	orange2	5	382106	5631	67857	40920	NA	NA	NA	NA	NA	NA	NA	NA	NA	NA	NA	NA
Mbuti	Aconcagua	AHUR770c	QhapaqHucha_Inka_LH	Argentina_Aconcagua_Inca_500BP.SG	brown3	9	SouthernNorthAmerica_EH	USA_Nevada_SpiritCave_11000BP.SG	blueviolet	22	37114	4742	78261	88789	NA	NA	NA	NA	400419	4482	89344	385038	405421	5262	77041	124769
Mbuti	Aconcagua	Lovelock1	QhapaqHucha_Inka_LH	Argentina_Aconcagua_Inca_500BP.SG	brown3	9	SouthernNorthAmerica_LH	USA_Nevada_LovelockCave_1850BP.SG	blueviolet	1	368895	3453	106845	603796	374199	4403	84996	119937	393766	4148	94927	2748195	393535	4283	91884	878072
Mbuti	Aconcagua	PS-18	QhapaqHucha_Inka_LH	Argentina_Aconcagua_Inca_500BP.SG	brown3	9	California_SouthernMainland_LH	USA_CA_PointSal_1500BP.SG	palevioletred3	2	367965	5335	68969	57509	NA	NA	NA	NA	396733	4584	86543	254257	407148	5666	71.86	80140
Mbuti	Aconcagua	SN-15	QhapaqHucha_Inka_LH	Argentina_Aconcagua_Inca_500BP.SG	brown3	9	California_SouthernChannelIslands_LH	USA_CA_SanNicolas_1600BP.SG	violet	8	372207	4254	87494	132587	NA	NA	NA	NA	397132	4511	88038	584373	398548	4901	81325	188430
Mbuti	Aconcagua	OTT-1160	QhapaqHucha_Inka_LH	Argentina_Aconcagua_Inca_500BP.SG	brown3	9	CentralAndes_LateIntermediate_LH	Peru_Ollantaytambo_LIP.Capt	orange1	13	38019	3562	106745	532363	379291	4454	85151	102895	NA	NA	NA	NA	NA	NA	NA	NA
Mbuti	Aconcagua	KCA-3089	QhapaqHucha_Inka_LH	Argentina_Aconcagua_Inca_500BP.SG	brown3	9	CentralAndes_LateHorizon_LH	Peru_Kusicancha2_LH.Capt	darkorange2	9	382338	3561	107362	511744	386455	4697	82269	98860	NA	NA	NA	NA	NA	NA	NA	NA
Mbuti	Aconcagua	TOY-7A-1	QhapaqHucha_Inka_LH	Argentina_Aconcagua_Inca_500BP.SG	brown3	9	CentralAndes_LateIntermediate_LH	Peru_Torontoy_500BP.Capt	orange1	12	380562	3426	111.08	531686	375444	4516	83131	103739	NA	NA	NA	NA	NA	NA	NA	NA
Mbuti	Aconcagua	SN_50	QhapaqHucha_Inka_LH	Argentina_Aconcagua_Inca_500BP.SG	brown3	9	California_SouthernChannelIslands_LH	USA_CA_SanNicolas_1600BP.SG	violet	8	371286	3842	96626	280946	373381	5184	72027	54819	397997	4291	92759	1183638	398621	4624	86207	373371
Mbuti	Aconcagua	I15176	QhapaqHucha_Inka_LH	Argentina_Aconcagua_Inca_500BP.SG	brown3	9	California_Central_LH	USA_CA_CalaverasCounty_600BP.Capt	palevioletred1	7	370608	3684	100608	322389	370232	5349	69.21	61004	NA	NA	NA	NA	NA	NA	NA	NA
Mbuti	Aconcagua	I0038	QhapaqHucha_Inka_LH	Argentina_Aconcagua_Inca_500BP.SG	brown3	9	CentralAndes_EH	Peru_Lauricocha_8600BP.Capt	darkorange4	22	371282	3432	108173	649949	372309	4281	86971	126487	NA	NA	NA	NA	NA	NA	NA	NA
Mbuti	Aconcagua	I12376	QhapaqHucha_Inka_LH	Argentina_Aconcagua_Inca_500BP.SG	brown3	9	Pampa_LH	Argentina_LagunaToro_2400BP.Capt	lightblue	2	37936	4353	87142	115003	NA	NA	NA	NA	NA	NA	NA	NA	NA	NA	NA	NA
Mbuti	Aconcagua	I0968	QhapaqHucha_Inka_LH	Argentina_Aconcagua_Inca_500BP.SG	brown3	9	CentralAndes_MiddleHorizon_LH	Peru_LimaCoast_MH_1000BP.Capt	orange2	10	388807	5747	67651	43611	NA	NA	NA	NA	NA	NA	NA	NA	NA	NA	NA	NA
Mbuti	Aconcagua	Yaghan895	QhapaqHucha_Inka_LH	Argentina_Aconcagua_Inca_500BP.SG	brown3	9	SouthPatagonia_LH	Argentina_BeagleChannel_Yamana_100BP.SG	blue1	1	372238	3537	105228	385657	372531	4814	77391	72935	402874	4235	95134	1691903	404621	4457	90787	509988
Mbuti	Aconcagua	KCA-1298	QhapaqHucha_Inka_LH	Argentina_Aconcagua_Inca_500BP.SG	brown3	9	CentralAndes_LateHorizon_LH	Peru_Kusicancha1_LH.Capt	darkorange2	8	383369	3528	108663	505856	385601	4675	82473	97721	NA	NA	NA	NA	NA	NA	NA	NA
Mbuti	Aconcagua	F9	QhapaqHucha_Inka_LH	Argentina_Aconcagua_Inca_500BP.SG	brown3	9	SouthernNorthAmerica_LH	Mexico_SierraTarahumara_PostClassic.SG	blueviolet	3	367394	3537	103871	491718	366423	4488	81.64	96533	391951	4011	97707	2292512	392101	4215	93.02	721308
Mbuti	Aconcagua	I0967	QhapaqHucha_Inka_LH	Argentina_Aconcagua_Inca_500BP.SG	brown3	9	CentralAndes_LateIntermediate_LH	Peru_LIP_Ychsma.Capt	orange1	9	380403	428	88.87	133359	NA	NA	NA	NA	NA	NA	NA	NA	NA	NA	NA	NA
Mbuti	Aconcagua	I1484	QhapaqHucha_Inka_LH	Argentina_Aconcagua_Inca_500BP.SG	brown3	9	CentralAndes_MiddleHorizon_LH	Peru_Laramate_900BP.Capt	orange2	8	38127	3536	107835	455594	383416	4628	82853	86313	NA	NA	NA	NA	NA	NA	NA	NA
Mbuti	Aconcagua	I11260	QhapaqHucha_Inka_LH	Argentina_Aconcagua_Inca_500BP.SG	brown3	9	California_Central_LH	USA_CA_Carmel_600BP.Capt	palevioletred1	6	371798	3556	104565	489413	375166	4466	83996	92929	NA	NA	NA	NA	NA	NA	NA	NA
Mbuti	Aconcagua	Lovelock4	QhapaqHucha_Inka_LH	Argentina_Aconcagua_Inca_500BP.SG	brown3	9	SouthernNorthAmerica_LH	USA_Nevada_LovelockCave_1850BP.SG	blueviolet	1	364583	373	97736	312303	362182	5254	68936	61429	387993	4028	96322	1380526	385667	4167	92551	438060
Mbuti	Aconcagua	SN-13	QhapaqHucha_Inka_LH	Argentina_Aconcagua_Inca_500BP.SG	brown3	9	California_SouthernChannelIslands_LH	USA_CA_SanNicolas_1600BP.SG	violet	8	362886	3541	102484	352385	361422	4857	74419	68792	387718	4026	96311	1492167	392374	4291	91438	471268
Mbuti	Aconcagua	AR0501	QhapaqHucha_Inka_LH	Argentina_Aconcagua_Inca_500BP.SG	brown3	9	Uspallata	LH-MF|LH-F	goldenrod1	21	377342	4007	94161	207076	382234	6052	63163	40150	404652	4113	98379	886858	406711	4476	90859	279168
Mbuti	Aconcagua	Anzick	QhapaqHucha_Inka_LH	Argentina_Aconcagua_Inca_500BP.SG	brown3	9	SouthernNorthAmerica_EH	USA_Anzick.SG	blueviolet	21	360726	3528	102257	783061	363052	4183	86785	154896	385672	4225	91288	3671593	38725	4313	89.79	1168084
Mbuti	Aconcagua	B-04	QhapaqHucha_Inka_LH	Argentina_Aconcagua_Inca_500BP.SG	brown3	9	California_Baja_LH	Mexico_Baja_Comondu_Unknown.SG	palevioletred1	1	357738	5736	62365	40781	NA	NA	NA	NA	390284	4739	82361	173001	390234	5656	68.99	54740
Mbuti	Aconcagua	I2544	QhapaqHucha_Inka_LH	Argentina_Aconcagua_Inca_500BP.SG	brown3	9	CentralAndes_LateIntermediate_LH	Peru_Chanka_LIP.Capt	orange1	4	383405	3545	108152	551468	385134	4569	84292	106138	NA	NA	NA	NA	NA	NA	NA	NA
Mbuti	Aconcagua	I0964	QhapaqHucha_Inka_LH	Argentina_Aconcagua_Inca_500BP.SG	brown3	9	CentralAndes_LateIntermediate_LH	Peru_Lima_LIP_650BP.Capt	orange1	6	38009	5152	73773	57380	NA	NA	NA	NA	NA	NA	NA	NA	NA	NA	NA	NA
Mbuti	Aconcagua	I11551	QhapaqHucha_Inka_LH	Argentina_Aconcagua_Inca_500BP.SG	brown3	9	California_Central_LH	USA_CA_Carmel_600BP.Capt	palevioletred1	6	372545	4009	92937	161374	NA	NA	NA	NA	NA	NA	NA	NA	NA	NA	NA	NA
Mbuti	Aconcagua	I3564	QhapaqHucha_Inka_LH	Argentina_Aconcagua_Inca_500BP.SG	brown3	9	California_NorthernChannelIslands_LH	USA_CA_SantaRosa_3000BP.Capt	violet	3	371077	3607	102876	531010	367981	4511	81571	101354	NA	NA	NA	NA	NA	NA	NA	NA
Mbuti	Aconcagua	I12355	QhapaqHucha_Inka_LH	Argentina_Aconcagua_Inca_500BP.SG	brown3	9	SouthPatagonia_LH	Argentina_BeagleChannel_Yamana_1500BP.Capt	blue1	2	37824	3606	104895	424660	377957	4872	77584	80336	NA	NA	NA	NA	NA	NA	NA	NA
Mbuti	Aconcagua	I12943	QhapaqHucha_Inka_LH	Argentina_Aconcagua_Inca_500BP.SG	brown3	9	SouthPatagonia_LH	Argentina_BeagleChannel_Yamana_100BP.Capt	blue1	1	376836	3464	108796	561337	377039	4487	84032	107948	NA	NA	NA	NA	NA	NA	NA	NA
Mbuti	Aconcagua	2417Q	QhapaqHucha_Inka_LH	Argentina_Aconcagua_Inca_500BP.SG	brown3	9	CentralAmerica_LH	Mexico_SierraGorda_Terminalclassic.SG	darkviolet	4	375284	3494	107404	770121	377535	4355	86696	152585	401653	4291	93605	3621055	401472	4355	92195	1152099
Mbuti	Aconcagua	AR0527	QhapaqHucha_Inka_LH	Argentina_Aconcagua_Inca_500BP.SG	brown3	9	Uspallata	LH-MF|LH-F	goldenrod1	21	375623	3683	101989	465661	377718	4727	79905	91264	403322	4369	92322	2003860	404235	4491	90018	631498
Mbuti	Aconcagua	I8576	QhapaqHucha_Inka_LH	Argentina_Aconcagua_Inca_500BP.SG	brown3	9	SouthPatagonia_LH	Chile_NorthTierradelFuego_Selknam_100BP.Capt	blue1	6	374597	3626	103296	441537	378367	4892	77345	85824	NA	NA	NA	NA	NA	NA	NA	NA
Mbuti	Aconcagua	Cuncaicha15-03	QhapaqHucha_Inka_LH	Argentina_Aconcagua_Inca_500BP.SG	brown3	9	CentralAndes_MH	Peru_Cuncaicha_4200BP.Capt	orange4	21	377888	3531	107.01	471430	374616	4646	80625	89627	NA	NA	NA	NA	NA	NA	NA	NA
Mbuti	Aconcagua	Lovelock2	QhapaqHucha_Inka_LH	Argentina_Aconcagua_Inca_500BP.SG	brown3	9	SouthernNorthAmerica_LH	USA_Nevada_LovelockCave_1850BP.SG	blueviolet	1	361917	3576	101219	792456	361605	4412	81954	157396	386683	4251	90964	3781447	385328	4351	88563	1209585
Mbuti	Aconcagua	I0042	QhapaqHucha_Inka_LH	Argentina_Aconcagua_Inca_500BP.SG	brown3	9	CentralAndes_LateIntermediate_LH	Peru_LIP_Botigiriayocc_600BP.Capt	orange1	7	379812	349	108828	708024	380675	4279	88961	138593	NA	NA	NA	NA	NA	NA	NA	NA
Mbuti	Aconcagua	I2236	QhapaqHucha_Inka_LH	Argentina_Aconcagua_Inca_500BP.SG	brown3	9	CentralAndes_LateIntermediate_LH	Peru_Chanka_LIP.Capt	orange1	4	38717	4443	87143	128922	NA	NA	NA	NA	NA	NA	NA	NA	NA	NA	NA	NA
Mbuti	Aconcagua	I17114	QhapaqHucha_Inka_LH	Argentina_Aconcagua_Inca_500BP.SG	brown3	9	SouthernNorthAmerica_LH	Mexico_Tayopa_1000BP.Capt	blueviolet	5	362189	5083	71253	67382	NA	NA	NA	NA	NA	NA	NA	NA	NA	NA	NA	NA
Mbuti	Aconcagua	I8349	QhapaqHucha_Inka_LH	Argentina_Aconcagua_Inca_500BP.SG	brown3	9	Pampa_MH	Argentina_LagunaChica_6800BP.Capt	lightblue	23	370283	3917	94541	241668	374839	5942	63079	44113	NA	NA	NA	NA	NA	NA	NA	NA
Mbuti	Aconcagua	I2251	QhapaqHucha_Inka_LH	Argentina_Aconcagua_Inca_500BP.SG	brown3	9	CentralAndes_LateIntermediate_LH	Peru_Highlands_LIP_Chimu.Capt	orange1	5	385519	354	108907	439128	382768	4605	83116	83375	NA	NA	NA	NA	NA	NA	NA	NA
Mbuti	Aconcagua	Cuncaicha15-04	QhapaqHucha_Inka_LH	Argentina_Aconcagua_Inca_500BP.SG	brown3	9	CentralAndes_MH	Peru_Cuncaicha_3300BP_contam.Capt	orange4	25	373991	3481	107.43	539265	376163	4457	84396	103745	NA	NA	NA	NA	NA	NA	NA	NA
Mbuti	Aconcagua	I0308	QhapaqHucha_Inka_LH	Argentina_Aconcagua_Inca_500BP.SG	brown3	9	Pampa_MH	Argentina_ArroyoSeco2_7700BP.Capt	lightblue	22	37339	3694	101089	281109	368771	5459	67552	53697	NA	NA	NA	NA	NA	NA	NA	NA
Mbuti	Aconcagua	SN-38	QhapaqHucha_Inka_LH	Argentina_Aconcagua_Inca_500BP.SG	brown3	9	California_SouthernChannelIslands_LH	USA_CA_SanNicolas_1600BP.SG	violet	8	362689	5115	70904	56970	NA	NA	NA	NA	3949	4487	88012	240608	397713	5414	73466	76804
Mbuti	Aconcagua	AR0512	QhapaqHucha_Inka_LH	Argentina_Aconcagua_Inca_500BP.SG	brown3	9	Uspallata	LH-MF|LH-F	goldenrod1	21	37735	3429	110036	773642	377773	4338	87089	152949	405059	4167	97.2	3526174	405147	4322	93741	1122438
Mbuti	Aconcagua	I8348	QhapaqHucha_Inka_LH	Argentina_Aconcagua_Inca_500BP.SG	brown3	9	Pampa_MH	Argentina_LagunaChica_6800BP.Capt	lightblue	23	367761	449	81912	110743	NA	NA	NA	NA	NA	NA	NA	NA	NA	NA	NA	NA
Mbuti	Aconcagua	I15174	QhapaqHucha_Inka_LH	Argentina_Aconcagua_Inca_500BP.SG	brown3	9	California_Central_LH	USA_CA_CalaverasCounty_600BP.Capt	palevioletred1	7	372794	3627	102769	441127	373294	4705	79336	84683	NA	NA	NA	NA	NA	NA	NA	NA
Mbuti	Aconcagua	I2558	QhapaqHucha_Inka_LH	Argentina_Aconcagua_Inca_500BP.SG	brown3	9	CentralAndes_EarlyIntermediate_LH	Peru_Ullujaya_EIP_1350BP.Capt	darkorange1	5	384436	4125	93204	192168	383998	6485	59211	35948	NA	NA	NA	NA	NA	NA	NA	NA
Mbuti	Aconcagua	AM71	QhapaqHucha_Inka_LH	Argentina_Aconcagua_Inca_500BP.SG	brown3	9	SouthPatagonia_LH	Chile_StraitOfMagellan_Kaweskar_100BP.SG	blue1	8	377508	5299	71239	60262	NA	NA	NA	NA	408372	4559	89578	280755	41719	5375	77615	83479
Mbuti	Aconcagua	SN-17	QhapaqHucha_Inka_LH	Argentina_Aconcagua_Inca_500BP.SG	brown3	9	California_SouthernChannelIslands_MH	USA_CA_SanNicolas_4800BP.SG	violet	23	372616	3617	103026	681228	377114	4465	84454	135246	398253	4369	91155	3023505	400287	4492	89109	972178
Mbuti	Aconcagua	AR0520	QhapaqHucha_Inka_LH	Argentina_Aconcagua_Inca_500BP.SG	brown3	9	Uspallata	LH-LFplc|LH-F	darkorange	22	374867	4072	92052	191417	377734	6264	60299	37890	399226	4209	94858	853320	39955	4449	89814	273428
Mbuti	Aconcagua	Lovelock3	QhapaqHucha_Inka_LH	Argentina_Aconcagua_Inca_500BP.SG	brown3	9	SouthernNorthAmerica_LH	USA_Nevada_LovelockCave_600BP.SG	blueviolet	2	370548	3423	108.25	792237	374547	4251	88.1	157393	392331	3989	98.35	3783943	391024	4103	95304	1210058
Mbuti	Aconcagua	KMA-28-1	QhapaqHucha_Inka_LH	Argentina_Aconcagua_Inca_500BP.SG	brown3	9	CentralAndes_LateHorizon_LH	Peru_Kanamarka1_LH.Capt	darkorange2	5	381448	3536	107872	592685	38409	4485	85635	115439	NA	NA	NA	NA	NA	NA	NA	NA
Mbuti	Aconcagua	I15173	QhapaqHucha_Inka_LH	Argentina_Aconcagua_Inca_500BP.SG	brown3	9	California_Central_LH	USA_CA_CalaverasCounty_600BP.Capt	palevioletred1	7	377384	3665	102971	454259	377615	4788	78875	87328	NA	NA	NA	NA	NA	NA	NA	NA
Mbuti	Aconcagua	Yaghan890	QhapaqHucha_Inka_LH	Argentina_Aconcagua_Inca_500BP.SG	brown3	9	SouthPatagonia_LH	Argentina_BeagleChannel_Yamana_100BP.SG	blue1	1	364792	4421	82523	129766	NA	NA	NA	NA	398444	424	93.98	671512	408737	4681	87326	195319
Mbuti	Aconcagua	AR0517	QhapaqHucha_Inka_LH	Argentina_Aconcagua_Inca_500BP.SG	brown3	9	Uspallata	LH-MFout|LH-F	goldenrod1	23	375377	359	104561	243041	379353	5634	67332	47701	39756	4021	98.87	1033017	398563	4376	91073	328930
Mbuti	Aconcagua	I2549	QhapaqHucha_Inka_LH	Argentina_Aconcagua_Inca_500BP.SG	brown3	9	CentralAndes_LateIntermediate_LH	Peru_Palpa_LIP_550BP.Capt	orange1	10	382026	3892	98158	251006	382594	5768	66333	47243	NA	NA	NA	NA	NA	NA	NA	NA
Mbuti	Aconcagua	I12941	QhapaqHucha_Inka_LH	Argentina_Aconcagua_Inca_500BP.SG	brown3	9	SouthPatagonia_LH	Argentina_BeagleChannel_Yamana_100BP.Capt	blue1	1	375241	3549	105741	561533	375089	4589	81738	107784	NA	NA	NA	NA	NA	NA	NA	NA
Mbuti	Aconcagua	SHN-902	QhapaqHucha_Inka_LH	Argentina_Aconcagua_Inca_500BP.SG	brown3	9	CentralAndes_LateHorizon_LH	Peru_Sacsahuaman2_LH.Capt	darkorange2	13	377344	3863	97684	205797	378571	6078	62288	39434	NA	NA	NA	NA	NA	NA	NA	NA
Mbuti	Aconcagua	I2551	QhapaqHucha_Inka_LH	Argentina_Aconcagua_Inca_500BP.SG	brown3	9	CentralAndes_MiddleHorizon_LH	Peru_Laramate_900BP.Capt	orange2	8	384982	3557	108221	502878	382731	458	83559	96131	NA	NA	NA	NA	NA	NA	NA	NA
Mbuti	Aconcagua	I2711	QhapaqHucha_Inka_LH	Argentina_Aconcagua_Inca_500BP.SG	brown3	9	California_NorthernChannelIslands_MH	USA_CA_SantaRosa_7400BP.Capt	violet	21	373184	3685	101265	346581	373075	5159	72318	65575	NA	NA	NA	NA	NA	NA	NA	NA
Mbuti	Aconcagua	I1863	QhapaqHucha_Inka_LH	Argentina_Aconcagua_Inca_500BP.SG	brown3	9	SouthernNorthAmerica_LH	Mexico_CoyoteCave_2750BP.Capt	blueviolet	8	355432	5477	64895	44260	NA	NA	NA	NA	NA	NA	NA	NA	NA	NA	NA	NA
Mbuti	Aconcagua	MOS001	QhapaqHucha_Inka_LH	Argentina_Aconcagua_Inca_500BP.SG	brown3	9	Brazil_MH	Brazil_Moraes_5800BP.Capt	palegreen4	24	37174	4013	92623	171966	NA	NA	NA	NA	NA	NA	NA	NA	NA	NA	NA	NA
Mbuti	Aconcagua	AR0152	QhapaqHucha_Inka_LH	Argentina_Aconcagua_Inca_500BP.SG	brown3	9	Uspallata	LH-HG|LH-HG	darkorange4	23	379644	4523	83939	98911	NA	NA	NA	NA	404527	4295	94.19	468692	400115	4759	84075	151726
Mbuti	Aconcagua	I11968	QhapaqHucha_Inka_LH	Argentina_Aconcagua_Inca_500BP.SG	brown3	9	California_NorthernChannelIslands_LH	USA_CA_SantaRosa_3200BP.Capt	violet	5	370117	3654	101281	332826	37443	5096	73475	63917	NA	NA	NA	NA	NA	NA	NA	NA
Mbuti	Aconcagua	TOY-4-5	QhapaqHucha_Inka_LH	Argentina_Aconcagua_Inca_500BP.SG	brown3	9	CentralAndes_LateIntermediate_LH	Peru_Torontoy_500BP.Capt	orange1	12	381601	3722	102512	394093	385245	5033	76539	76155	NA	NA	NA	NA	NA	NA	NA	NA
Mbuti	Aconcagua	I0969	QhapaqHucha_Inka_LH	Argentina_Aconcagua_Inca_500BP.SG	brown3	9	CentralAndes_LateIntermediate_LH	Peru_Lima_LIP_650BP.Capt	orange1	6	38577	5951	64823	40143	NA	NA	NA	NA	NA	NA	NA	NA	NA	NA	NA	NA
Mbuti	Aconcagua	SC-05	QhapaqHucha_Inka_LH	Argentina_Aconcagua_Inca_500BP.SG	brown3	9	California_SouthernChannelIslands_LH	USA_CA_SanClemente_900BP.SG	violet	7	36698	3444	106553	761946	370984	4373	84844	150268	39437	4055	97248	3397831	39641	4185	94724	1076976
Mbuti	Aconcagua	I0966	QhapaqHucha_Inka_LH	Argentina_Aconcagua_Inca_500BP.SG	brown3	9	CentralAndes_LateIntermediate_LH	Peru_LIP_Ychsma.Capt	orange1	9	3851	4241	90808	149190	NA	NA	NA	NA	NA	NA	NA	NA	NA	NA	NA	NA
Mbuti	Aconcagua	SC-03	QhapaqHucha_Inka_LH	Argentina_Aconcagua_Inca_500BP.SG	brown3	9	California_SouthernChannelIslands_LH	USA_CA_SanClemente_900BP.SG	violet	7	362325	3735	96999	290856	363114	5255	69101	56570	389236	4284	90.85	1217906	390917	4567	85.59	379270
Mbuti	Aconcagua	AR0508	QhapaqHucha_Inka_LH	Argentina_Aconcagua_Inca_500BP.SG	brown3	9	Uspallata	LH-MF|LH-F	goldenrod1	21	378622	3552	106608	419372	380915	4851	78521	81929	404906	4041	100196	1818942	40616	4177	97247	573702
Mbuti	Aconcagua	OTT-1165	QhapaqHucha_Inka_LH	Argentina_Aconcagua_Inca_500BP.SG	brown3	9	CentralAndes_LateIntermediate_LH	Peru_Ollantaytambo_LIP.Capt	orange1	13	38331	3664	104624	378692	381394	4808	79324	73191	NA	NA	NA	NA	NA	NA	NA	NA
Mbuti	Aconcagua	Yaghan894	QhapaqHucha_Inka_LH	Argentina_Aconcagua_Inca_500BP.SG	brown3	9	SouthPatagonia_LH	Argentina_BeagleChannel_Yamana_100BP.SG	blue1	1	370875	3564	104063	355430	375778	5197	72309	67167	402802	3955	101841	1550727	404196	4189	96493	468784
Mbuti	Aconcagua	I12357	QhapaqHucha_Inka_LH	Argentina_Aconcagua_Inca_500BP.SG	brown3	9	SouthPatagonia_LH	Argentina_MitrePeninsula_Haush_400BP.Capt	blue1	3	375453	3651	102822	371125	375494	5055	74287	70203	NA	NA	NA	NA	NA	NA	NA	NA
Mbuti	Aconcagua	I0976	QhapaqHucha_Inka_LH	Argentina_Aconcagua_Inca_500BP.SG	brown3	9	CentralAndes_MiddleHorizon_LH	Bolivia_MH_Tiwanaku.Capt	orange2	3	378978	4746	79856	94623	NA	NA	NA	NA	NA	NA	NA	NA	NA	NA	NA	NA
Mbuti	Aconcagua	SN-44	QhapaqHucha_Inka_LH	Argentina_Aconcagua_Inca_500BP.SG	brown3	9	California_SouthernChannelIslands_MH	USA_CA_SanNicolas_4800BP.SG	violet	23	371148	3531	105114	746677	373451	4441	84.09	147672	397502	431	92.23	3351808	398822	4422	90191	1072359
Mbuti	Aconcagua	I1396	QhapaqHucha_Inka_LH	Argentina_Aconcagua_Inca_500BP.SG	brown3	9	CentralAndes_LateIntermediate_LH	Peru_LIP_Pacapaccari_600BP.Capt	orange1	8	383628	5711	67176	46847	NA	NA	NA	NA	NA	NA	NA	NA	NA	NA	NA	NA
Mbuti	Aconcagua	SJArg-3	QhapaqHucha_Inka_LH	Argentina_Aconcagua_Inca_500BP.SG	brown3	9	Cuyo_LH	Argentina_Callingasta_1500BP.SG	brown3	1	380009	5749	66105	41538	NA	NA	NA	NA	405047	4694	86288	174454	410094	583	70346	55080
Mbuti	Aconcagua	QKI-9-3	QhapaqHucha_Inka_LH	Argentina_Aconcagua_Inca_500BP.SG	brown3	9	CentralAndes_LateHorizon_LH	Peru_Qotakalli1_LH.Capt	darkorange2	10	383954	3609	106394	377487	378392	4941	76587	72327	NA	NA	NA	NA	NA	NA	NA	NA
Mbuti	Aconcagua	I2706	QhapaqHucha_Inka_LH	Argentina_Aconcagua_Inca_500BP.SG	brown3	9	California_NorthernChannelIslands_LH	USA_CA_SantaRosa_300BP.Capt	violet	4	369756	3994	92583	194582	366466	6173	59364	36311	NA	NA	NA	NA	NA	NA	NA	NA
Mbuti	Aconcagua	AR0518	QhapaqHucha_Inka_LH	Argentina_Aconcagua_Inca_500BP.SG	brown3	9	Uspallata	LH-MF|LH-F	goldenrod1	21	376384	3575	105284	708598	377183	4383	86054	140044	401788	4166	96438	3221961	400264	4244	94.31	1026474
Mbuti	Aconcagua	I2238	QhapaqHucha_Inka_LH	Argentina_Aconcagua_Inca_500BP.SG	brown3	9	CentralAndes_EarlyIntermediate_LH	Peru_EIP_Moche.Capt	darkorange1	6	380559	4793	79397	72258	NA	NA	NA	NA	NA	NA	NA	NA	NA	NA	NA	NA
Mbuti	Aconcagua	I2230	QhapaqHucha_Inka_LH	Argentina_Aconcagua_Inca_500BP.SG	brown3	9	Pampa_MH	Argentina_ArroyoSeco2_7700BP.Capt	lightblue	22	373572	3529	105847	532764	371673	4456	83411	103239	NA	NA	NA	NA	NA	NA	NA	NA
Mbuti	Aconcagua	I0748	QhapaqHucha_Inka_LH	Argentina_Aconcagua_Inca_500BP.SG	brown3	9	California_SouthernChannelIslands_LH	USA_CA_SanClemente_500BP.Capt	violet	9	364332	3504	103962	589487	365215	4391	83166	114420	NA	NA	NA	NA	NA	NA	NA	NA
Mbuti	Aconcagua	I2704	QhapaqHucha_Inka_LH	Argentina_Aconcagua_Inca_500BP.SG	brown3	9	California_NorthernChannelIslands_LH	USA_CA_SantaRosa_300BP.Capt	violet	4	372014	3683	101007	498890	371615	4745	78323	94495	NA	NA	NA	NA	NA	NA	NA	NA
Mbuti	Aconcagua	MA577	QhapaqHucha_Inka_LH	Argentina_Aconcagua_Inca_500BP.SG	brown3	9	SouthPatagonia_LH	Argentina_NorthTierradelFiego_Selknam_100BP.SG	blue1	4	371951	3467	107296	554618	375417	4512	83206	107376	397295	4139	95996	2408999	397781	4323	92023	743802
Mbuti	Aconcagua	I1358	QhapaqHucha_Inka_LH	Argentina_Aconcagua_Inca_500BP.SG	brown3	9	CentralAndes_LateIntermediate_LH	Peru_LIP_Pacapaccari_600BP.Capt	orange1	8	386321	3767	102545	372970	384482	4991	77.04	71426	NA	NA	NA	NA	NA	NA	NA	NA
Mbuti	Aconcagua	I0040	QhapaqHucha_Inka_LH	Argentina_Aconcagua_Inca_500BP.SG	brown3	9	CentralAndes_MH	Peru_Lauricocha_5800BP.Capt	orange4	24	384708	3643	105601	421650	389072	4838	80426	81664	NA	NA	NA	NA	NA	NA	NA	NA
Mbuti	Aconcagua	I7090	QhapaqHucha_Inka_LH	Argentina_Aconcagua_Inca_500BP.SG	brown3	9	Pampa_MH	Argentina_ArroyoSeco2_7200BP.Capt	lightblue	21	370275	4098	90363	130542	NA	NA	NA	NA	NA	NA	NA	NA	NA	NA	NA	NA
Mbuti	Aconcagua	QKI-809	QhapaqHucha_Inka_LH	Argentina_Aconcagua_Inca_500BP.SG	brown3	9	CentralAndes_LateHorizon_LH	Peru_Qotakalli1_LH.Capt	darkorange2	10	383585	3436	111632	548941	381547	4513	84546	106843	NA	NA	NA	NA	NA	NA	NA	NA
Mbuti	Aconcagua	PS-07	QhapaqHucha_Inka_LH	Argentina_Aconcagua_Inca_500BP.SG	brown3	9	California_SouthernMainland_LH	USA_CA_PointSal_1500BP.SG	palevioletred3	2	373151	4014	92969	156439	NA	NA	NA	NA	398184	4134	96315	621910	398252	4541	87704	193566
Mbuti	Aconcagua	I11296	QhapaqHucha_Inka_LH	Argentina_Aconcagua_Inca_500BP.SG	brown3	9	California_SouthernMainland_LH	USA_CA_Goleta_2600BP.Capt	palevioletred3	7	370791	3414	108603	513599	368906	4429	83297	98268	NA	NA	NA	NA	NA	NA	NA	NA
Mbuti	Aconcagua	AR0506	QhapaqHucha_Inka_LH	Argentina_Aconcagua_Inca_500BP.SG	brown3	9	Uspallata	LH-MF|LH-F	goldenrod1	21	377634	3636	103846	398048	38398	4945	77654	77543	405069	4106	98653	1704217	406325	4238	95879	534984
Mbuti	Aconcagua	Sumidouro8	QhapaqHucha_Inka_LH	Argentina_Aconcagua_Inca_500BP.SG	brown3	9	Brazil_EH	Brazil_Sumidouro_9800BP.SG	palegreen1	22	364644	4799	75979	72222	NA	NA	NA	NA	39064	451	86624	308369	396275	5025	78858	100439
Mbuti	Aconcagua	I1753	QhapaqHucha_Inka_LH	Argentina_Aconcagua_Inca_500BP.SG	brown3	9	CentralChile_MH	Chile_LosRieles_5100BP.Capt	brown1	23	373607	3632	102857	517099	374899	4558	82252	99174	NA	NA	NA	NA	NA	NA	NA	NA
Mbuti	Aconcagua	NC	QhapaqHucha_Inka_LH	Argentina_Aconcagua_Inca_500BP.SG	brown3	9	California_SouthernMainland_LH	USA_CA_NewCuyama_1300BP.SG	palevioletred3	1	368209	3605	102142	306640	364692	5116	71.28	60132	395852	4106	96402	1290899	394993	4352	90753	404557
Mbuti	Aconcagua	SN-39	QhapaqHucha_Inka_LH	Argentina_Aconcagua_Inca_500BP.SG	brown3	9	California_SouthernChannelIslands_MH	USA_CA_SanNicolas_4800BP.SG	violet	23	364467	4211	86.56	137848	NA	NA	NA	NA	397239	4563	87063	574164	39842	5186	76831	182806
Mbuti	Aconcagua	I0751	QhapaqHucha_Inka_LH	Argentina_Aconcagua_Inca_500BP.SG	brown3	9	California_SouthernChannelIslands_LH	USA_CA_SanClemente_500BP.Capt	violet	9	36499	3496	104407	605317	366963	4473	82042	117701	NA	NA	NA	NA	NA	NA	NA	NA
Mbuti	Aconcagua	Lapa15	QhapaqHucha_Inka_LH	Argentina_Aconcagua_Inca_500BP.SG	brown3	9	Brazil_EH	Brazil_LapaDoSanto_9600BP.Capt	palegreen1	21	365917	3614	101254	395250	373596	4794	77928	74632	NA	NA	NA	NA	NA	NA	NA	NA
Mbuti	Aconcagua	MIS3	QhapaqHucha_Inka_LH	Argentina_Aconcagua_Inca_500BP.SG	brown3	9	CentralAndes_MiddleHorizon_LH	Bolivia_MH_Miraflores.Capt	orange2	2	37535	3529	106357	534623	377443	4539	83154	103663	NA	NA	NA	NA	NA	NA	NA	NA
Mbuti	Aconcagua	SHN-575	QhapaqHucha_Inka_LH	Argentina_Aconcagua_Inca_500BP.SG	brown3	9	CentralAndes_LateHorizon_LH	Peru_Sacsahuaman2_LH.Capt	darkorange2	13	383772	3476	110405	569455	386344	4444	86936	110400	NA	NA	NA	NA	NA	NA	NA	NA
Mbuti	Aconcagua	I14009	QhapaqHucha_Inka_LH	Argentina_Aconcagua_Inca_500BP.SG	brown3	9	CentralAndes_LateIntermediate_LH	Chile_LIP_Pukara_700BP.Capt	orange1	2	382724	4398	87013	122675	NA	NA	NA	NA	NA	NA	NA	NA	NA	NA	NA	NA
Mbuti	Aconcagua	AR0149	QhapaqHucha_Inka_LH	Argentina_Aconcagua_Inca_500BP.SG	brown3	9	Uspallata	LH-HG|LH-HG	darkorange4	23	381507	4229	90218	152947	NA	NA	NA	NA	405013	4434	91339	722277	401926	4804	83659	232029
Mbuti	Aconcagua	I2538	QhapaqHucha_Inka_LH	Argentina_Aconcagua_Inca_500BP.SG	brown3	9	CentralAndes_MiddleHorizon_LH	Chile_CaletaHuelen_MH_1100BP.Capt	orange2	5	378485	4644	81494	97028	NA	NA	NA	NA	NA	NA	NA	NA	NA	NA	NA	NA
Mbuti	Aconcagua	IO2	QhapaqHucha_Inka_LH	Argentina_Aconcagua_Inca_500BP.SG	brown3	9	CentralAndes_MiddleHorizon_LH	Bolivia_MH_Iroco_1050BP.Capt	orange2	1	376997	3538	106561	376343	374791	4986	75164	72956	NA	NA	NA	NA	NA	NA	NA	NA
Mbuti	Aconcagua	Sumidouro5	QhapaqHucha_Inka_LH	Argentina_Aconcagua_Inca_500BP.SG	brown3	9	Brazil_EH	Brazil_Sumidouro_10400BP.SG	palegreen1	22	370273	3451	107308	790179	376975	4369	86277	156583	397254	4261	93239	3650921	400412	4405	90909	1167803
Mbuti	Aconcagua	MIS6	QhapaqHucha_Inka_LH	Argentina_Aconcagua_Inca_500BP.SG	brown3	9	CentralAndes_MiddleHorizon_LH	Bolivia_MiraFlores_MH.Capt	orange2	4	371672	4672	79546	66756	NA	NA	NA	NA	NA	NA	NA	NA	NA	NA	NA	NA
Mbuti	Aconcagua	AR0528	QhapaqHucha_Inka_LH	Argentina_Aconcagua_Inca_500BP.SG	brown3	9	Uspallata	LH-MF|LH-F	goldenrod1	21	372988	3567	104552	436508	379589	4741	80068	85547	401233	4169	96243	1901179	402459	4403	91402	598500
Mbuti	Aconcagua	Lapa14	QhapaqHucha_Inka_LH	Argentina_Aconcagua_Inca_500BP.SG	brown3	9	Brazil_EH	Brazil_LapaDoSanto_9600BP.Capt	palegreen1	21	366064	3546	103231	299943	368003	508	72446	55999	NA	NA	NA	NA	NA	NA	NA	NA
Mbuti	Aconcagua	SN-32	QhapaqHucha_Inka_LH	Argentina_Aconcagua_Inca_500BP.SG	brown3	9	California_SouthernChannelIslands_MH	USA_CA_SanNicolas_4800BP.SG	violet	23	375598	5088	73822	72376	NA	NA	NA	NA	401635	4634	86663	305293	404328	5433	74423	97239
Mbuti	Aconcagua	I17113	QhapaqHucha_Inka_LH	Argentina_Aconcagua_Inca_500BP.SG	brown3	9	SouthernNorthAmerica_LH	Mexico_Tayopa_1000BP.Capt	blueviolet	5	357536	4518	79134	84918	NA	NA	NA	NA	NA	NA	NA	NA	NA	NA	NA	NA
Mbuti	Aconcagua	I1744	QhapaqHucha_Inka_LH	Argentina_Aconcagua_Inca_500BP.SG	brown3	9	CentralAndes_LateIntermediate_LH	Peru_SanSebastian_LIP_600BP.Capt	orange1	11	384617	3528	109019	465169	381758	4798	79572	88368	NA	NA	NA	NA	NA	NA	NA	NA
Mbuti	Aconcagua	I1479	QhapaqHucha_Inka_LH	Argentina_Aconcagua_Inca_500BP.SG	brown3	9	CentralAndes_LateIntermediate_LH	Peru_Palpa_LIP_550BP.Capt	orange1	10	382164	3671	104098	358198	385355	5095	75639	68075	NA	NA	NA	NA	NA	NA	NA	NA
Mbuti	Aconcagua	I0977	QhapaqHucha_Inka_LH	Argentina_Aconcagua_Inca_500BP.SG	brown3	9	CentralAndes_MiddleHorizon_LH	Bolivia_MH_Tiwanaku.Capt	orange2	3	369842	5756	64256	36692	NA	NA	NA	NA	NA	NA	NA	NA	NA	NA	NA	NA
Mbuti	Aconcagua	I2709	QhapaqHucha_Inka_LH	Argentina_Aconcagua_Inca_500BP.SG	brown3	9	California_NorthernChannelIslands_MH	USA_CA_SantaRosa_4900BP.Capt	violet	22	370207	3926	94299	208714	371581	6145	60467	38823	NA	NA	NA	NA	NA	NA	NA	NA
Mbuti	Aconcagua	I3565	QhapaqHucha_Inka_LH	Argentina_Aconcagua_Inca_500BP.SG	brown3	9	California_NorthernChannelIslands_LH	USA_CA_SantaRosa_3000BP.Capt	violet	3	373941	372	100511	528999	378378	4717	80.21	100902	NA	NA	NA	NA	NA	NA	NA	NA
Mbuti	Aconcagua	I0965	QhapaqHucha_Inka_LH	Argentina_Aconcagua_Inca_500BP.SG	brown3	9	CentralAndes_LateIntermediate_LH	Peru_Lima_LIP_650BP.Capt	orange1	6	38161	4577	83368	105729	NA	NA	NA	NA	NA	NA	NA	NA	NA	NA	NA	NA
Mbuti	Aconcagua	I2708	QhapaqHucha_Inka_LH	Argentina_Aconcagua_Inca_500BP.SG	brown3	9	California_NorthernChannelIslands_LH	USA_CA_SantaRosa_3000BP.Capt	violet	3	369251	4368	84534	112550	NA	NA	NA	NA	NA	NA	NA	NA	NA	NA	NA	NA
Mbuti	Aconcagua	I2537	QhapaqHucha_Inka_LH	Argentina_Aconcagua_Inca_500BP.SG	brown3	9	CentralAndes_LateIntermediate_LH	Chile_PicaOcho_700BP.Capt	orange1	3	379566	367	103431	332815	375188	495	75797	63008	NA	NA	NA	NA	NA	NA	NA	NA
Mbuti	Aconcagua	I2244	QhapaqHucha_Inka_LH	Argentina_Aconcagua_Inca_500BP.SG	brown3	9	CentralAndes_MiddleHorizonLateIntermeditae_LH	Peru_MH_LIP_Lambayeque.Capt	darkorange3	2	38178	3616	105592	409433	380255	4659	81611	78964	NA	NA	NA	NA	NA	NA	NA	NA
Mbuti	Aconcagua	AHUR_2064	QhapaqHucha_Inka_LH	Argentina_Aconcagua_Inca_500BP.SG	brown3	9	SouthernNorthAmerica_EH	USA_Nevada_SpiritCave_11000BP.SG	blueviolet	22	371215	3478	106719	792293	372916	4252	87698	157437	396311	432	91.74	3773603	395754	4388	90.2	1207075
Mbuti	Aconcagua	I0760	QhapaqHucha_Inka_LH	Argentina_Aconcagua_Inca_500BP.SG	brown3	9	California_SouthernChannelIslands_LH	USA_CA_SanClemente_500BP.Capt	violet	9	361406	349	103556	607743	364071	438	83121	118135	NA	NA	NA	NA	NA	NA	NA	NA
Mbuti	Aconcagua	OTT-1187	QhapaqHucha_Inka_LH	Argentina_Aconcagua_Inca_500BP.SG	brown3	9	CentralAndes_LateIntermediate_LH	Peru_Ollantaytambo_LIP.Capt	orange1	13	377405	357	105724	565987	377094	453	83246	110089	NA	NA	NA	NA	NA	NA	NA	NA
Mbuti	Aconcagua	I12361	QhapaqHucha_Inka_LH	Argentina_Aconcagua_Inca_500BP.SG	brown3	9	SouthPatagonia_LH	Argentina_MitrePeninsula_Haush_400BP.Capt	blue1	3	375426	4626	81162	82067	NA	NA	NA	NA	NA	NA	NA	NA	NA	NA	NA	NA
Mbuti	Aconcagua	Cuncaicha15-07	QhapaqHucha_Inka_LH	Argentina_Aconcagua_Inca_500BP.SG	brown3	9	CentralAndes_EH	Peru_Cuncaicha_9000BP.Capt	darkorange4	21	375334	3635	103248	481920	377034	4697	80276	91924	NA	NA	NA	NA	NA	NA	NA	NA
Mbuti	Aconcagua	I11557	QhapaqHucha_Inka_LH	Argentina_Aconcagua_Inca_500BP.SG	brown3	9	California_NorthernChannelIslands_MH	USA_CA_SantaRosa_7400BP.Capt	violet	21	369472	3585	103049	568258	370413	4438	83463	109967	NA	NA	NA	NA	NA	NA	NA	NA
Mbuti	Aconcagua	SC-01	QhapaqHucha_Inka_LH	Argentina_Aconcagua_Inca_500BP.SG	brown3	9	California_SouthernChannelIslands_LH	USA_CA_SanClemente_900BP.SG	violet	7	371834	416	89374	138032	NA	NA	NA	NA	391743	433	90471	591698	390156	4779	81636	189456
Mbuti	Aconcagua	SN-20	QhapaqHucha_Inka_LH	Argentina_Aconcagua_Inca_500BP.SG	brown3	9	California_SouthernChannelIslands_MH	USA_CA_SanNicolas_4800BP.SG	violet	23	366122	6237	58705	37387	NA	NA	NA	NA	397164	4871	81532	155340	405726	6446	62939	48854
Mbuti	Aconcagua	OTT-1174	QhapaqHucha_Inka_LH	Argentina_Aconcagua_Inca_500BP.SG	brown3	9	CentralAndes_LateIntermediate_LH	Peru_Ollantaytambo_LIP.Capt	orange1	13	380461	3509	108431	416459	378708	4783	79184	80408	NA	NA	NA	NA	NA	NA	NA	NA
Mbuti	Aconcagua	MIS5	QhapaqHucha_Inka_LH	Argentina_Aconcagua_Inca_500BP.SG	brown3	9	CentralAndes_MiddleHorizon_LH	Bolivia_MH_Miraflores.Capt	orange2	2	379708	3593	105682	297661	372551	5047	73814	57220	NA	NA	NA	NA	NA	NA	NA	NA
Mbuti	Aconcagua	AR0509	QhapaqHucha_Inka_LH	Argentina_Aconcagua_Inca_500BP.SG	brown3	9	Uspallata	LH-MF|LH-F	goldenrod1	21	377404	3557	106104	610514	380457	4539	83826	120001	405079	425	95303	2721130	40573	4422	91.75	864534
Mbuti	Aconcagua	I12363	QhapaqHucha_Inka_LH	Argentina_Aconcagua_Inca_500BP.SG	brown3	9	SouthPatagonia_LH	Argentina_NorthTierradelFuego_Selknam_500BP.Capt	blue1	5	37458	3666	102182	431217	377721	4851	77869	82250	NA	NA	NA	NA	NA	NA	NA	NA
Mbuti	Aconcagua	AR0510	QhapaqHucha_Inka_LH	Argentina_Aconcagua_Inca_500BP.SG	brown3	9	Uspallata	LH-MF|LH-F	goldenrod1	21	374259	3561	105113	691001	377086	445	84733	136470	40129	4063	98776	3130821	401725	4164	96.48	997641
Mbuti	Aconcagua	I11967	QhapaqHucha_Inka_LH	Argentina_Aconcagua_Inca_500BP.SG	brown3	9	California_NorthernChannelIslands_LH	USA_CA_SantaRosa_300BP.Capt	violet	4	370155	3484	106244	550169	368651	4555	80932	105891	NA	NA	NA	NA	NA	NA	NA	NA
Mbuti	Aconcagua	KMA-2-2	QhapaqHucha_Inka_LH	Argentina_Aconcagua_Inca_500BP.SG	brown3	9	CentralAndes_LateHorizon_LH	Peru_Kanamarka2_LH.Capt	darkorange2	6	380882	3473	109669	568132	380782	4401	86525	110416	NA	NA	NA	NA	NA	NA	NA	NA
Mbuti	Aconcagua	I2545	QhapaqHucha_Inka_LH	Argentina_Aconcagua_Inca_500BP.SG	brown3	9	CentralAndes_LateHorizon_LH	Peru_LH_Inca.Capt	darkorange2	1	381009	4302	88557	120297	NA	NA	NA	NA	NA	NA	NA	NA	NA	NA	NA	NA
Mbuti	Aconcagua	I2540	QhapaqHucha_Inka_LH	Argentina_Aconcagua_Inca_500BP.SG	brown3	9	CentralAndes_MiddleHorizon_LH	Chile_CaletaHuelen_MH_1100BP.Capt	orange2	5	376803	362	104095	257919	374873	5523	67875	49382	NA	NA	NA	NA	NA	NA	NA	NA
Mbuti	Aconcagua	I17109	QhapaqHucha_Inka_LH	Argentina_Aconcagua_Inca_500BP.SG	brown3	9	SouthernNorthAmerica_LH	Mexico_Tayopa_1000BP.Capt	blueviolet	5	36142	4993	72389	69871	NA	NA	NA	NA	NA	NA	NA	NA	NA	NA	NA	NA
Mbuti	Aconcagua	I2241	QhapaqHucha_Inka_LH	Argentina_Aconcagua_Inca_500BP.SG	brown3	9	CentralAndes_MiddleHorizonLateIntermeditae_LH	Peru_MH_LIP_Lambayeque.Capt	darkorange3	2	384376	3564	107.84	522185	385327	4503	85575	100880	NA	NA	NA	NA	NA	NA	NA	NA
Mbuti	Aconcagua	I2261	QhapaqHucha_Inka_LH	Argentina_Aconcagua_Inca_500BP.SG	brown3	9	CentralAndes_MH	Peru_LaGalgada_4100BP.Capt	orange4	22	388023	3479	111523	620317	386338	4349	88837	120485	NA	NA	NA	NA	NA	NA	NA	NA
Mbuti	Aconcagua	I0041	QhapaqHucha_Inka_LH	Argentina_Aconcagua_Inca_500BP.SG	brown3	9	CentralAndes_EH	Peru_Lauricocha_8600BP.Capt	darkorange4	22	380094	3732	101844	365265	379455	4673	81204	70531	NA	NA	NA	NA	NA	NA	NA	NA
Mbuti	Aconcagua	I1743	QhapaqHucha_Inka_LH	Argentina_Aconcagua_Inca_500BP.SG	brown3	9	CentralAndes_LateHorizon_LH	Peru_SanSebastian_LH_500BP.Capt	darkorange2	2	381714	3832	99622	254846	384433	5472	70258	47787	NA	NA	NA	NA	NA	NA	NA	NA
Mbuti	Aconcagua	I11558	QhapaqHucha_Inka_LH	Argentina_Aconcagua_Inca_500BP.SG	brown3	9	California_NorthernChannelIslands_MH	USA_CA_SantaRosa_7400BP.Capt	violet	21	371091	3481	106606	560209	369853	455	81284	108097	NA	NA	NA	NA	NA	NA	NA	NA
Mbuti	Aconcagua	AR0162	QhapaqHucha_Inka_LH	Argentina_Aconcagua_Inca_500BP.SG	brown3	9	Uspallata	LH-LF|LH-F	darkorange4	21	375733	366	102656	512242	378359	4603	82201	101157	403356	4069	99137	2220019	403798	424	95228	706410
Mbuti	Aconcagua	AR0505	QhapaqHucha_Inka_LH	Argentina_Aconcagua_Inca_500BP.SG	brown3	9	Uspallata	LH-MF|LH-F	goldenrod1	21	376006	3541	106195	753655	379448	4363	86966	148441	402938	416	96863	3359756	40499	4353	93043	1062224
Mbuti	Aconcagua	PS-06	QhapaqHucha_Inka_LH	Argentina_Aconcagua_Inca_500BP.SG	brown3	9	California_SouthernMainland_LH	USA_CA_PointSal_1500BP.SG	palevioletred3	2	366585	3539	103586	523481	372123	447	83257	102777	396088	4123	96.07	2215904	395772	4311	91813	702609
Mbuti	Aconcagua	I12354	QhapaqHucha_Inka_LH	Argentina_Aconcagua_Inca_500BP.SG	brown3	9	SouthPatagonia_LH	Argentina_NorthTierradelFuego_Selknam_500BP.Capt	blue1	5	372752	3497	106585	597175	374775	4541	82525	115195	NA	NA	NA	NA	NA	NA	NA	NA
Mbuti	Aconcagua	CCA-7-2	QhapaqHucha_Inka_LH	Argentina_Aconcagua_Inca_500BP.SG	brown3	9	CentralAndes_LateHorizon_LH	Peru_CasaConcha2_LH.Capt	darkorange2	4	385391	3621	106445	597947	386179	459	84139	115975	NA	NA	NA	NA	NA	NA	NA	NA
Mbuti	Aconcagua	SN-11	QhapaqHucha_Inka_LH	Argentina_Aconcagua_Inca_500BP.SG	brown3	9	California_SouthernChannelIslands_LH	USA_CA_SanNicolas_1600BP.SG	violet	8	366719	343	106924	658480	374254	4399	85073	130206	392721	4059	96752	2933367	395865	4178	94754	941301
Mbuti	Aconcagua	I1742	QhapaqHucha_Inka_LH	Argentina_Aconcagua_Inca_500BP.SG	brown3	9	CentralAndes_MiddleHorizon_LH	Peru_Laramate_900BP.Capt	orange2	8	383394	3707	103428	297357	378294	5284	71587	56165	NA	NA	NA	NA	NA	NA	NA	NA
Mbuti	Aconcagua	SJArg-1	QhapaqHucha_Inka_LH	Argentina_Aconcagua_Inca_500BP.SG	brown3	9	Cuyo_LH	Argentina_Callingasta_1500BP.SG	brown3	1	373086	4163	89618	137749	NA	NA	NA	NA	400264	4347	92082	582248	407632	4693	86869	179661
Mbuti	Aconcagua	SN-25	QhapaqHucha_Inka_LH	Argentina_Aconcagua_Inca_500BP.SG	brown3	9	California_SouthernChannelIslands_MH	USA_CA_SanNicolas_4800BP.SG	violet	23	376536	6028	62467	40506	NA	NA	NA	NA	401164	4968	80744	175011	403059	634	63573	56402
Mbuti	Aconcagua	I5457	QhapaqHucha_Inka_LH	Argentina_Aconcagua_Inca_500BP.SG	brown3	9	CentralAmerica_MH	Belize_7400BP.Capt	mediumvioletred	24	367544	4004	91805	169107	NA	NA	NA	NA	NA	NA	NA	NA	NA	NA	NA	NA
Mbuti	AHUR_2064	SHN-355	SouthernNorthAmerica_EH	USA_Nevada_SpiritCave_11000BP.SG	blueviolet	22	CentralAndes_LateHorizon_LH	Peru_Sacsahuaman2_LH.Capt	darkorange2	13	365483	3625	100815	549507	36584	4523	80887	106971	NA	NA	NA	NA	NA	NA	NA	NA
Mbuti	AHUR_2064	KMA-2-2	SouthernNorthAmerica_EH	USA_Nevada_SpiritCave_11000BP.SG	blueviolet	22	CentralAndes_LateHorizon_LH	Peru_Kanamarka2_LH.Capt	darkorange2	6	365053	3597	101.5	627232	366779	4372	83886	122000	NA	NA	NA	NA	NA	NA	NA	NA
Mbuti	AHUR_2064	I11288	SouthernNorthAmerica_EH	USA_Nevada_SpiritCave_11000BP.SG	blueviolet	22	California_SouthernMainland_MH	USA_CA_Goleta_4700BP.Capt	palevioletred3	21	373086	3582	104165	546200	371259	4372	84909	104242	NA	NA	NA	NA	NA	NA	NA	NA
Mbuti	AHUR_2064	QKI-21-1	SouthernNorthAmerica_EH	USA_Nevada_SpiritCave_11000BP.SG	blueviolet	22	CentralAndes_LateHorizon_LH	Peru_Qotakalli1_LH.Capt	darkorange2	10	362772	4175	86.89	129502	NA	NA	NA	NA	NA	NA	NA	NA	NA	NA	NA	NA
Mbuti	AHUR_2064	CCA-7-2	SouthernNorthAmerica_EH	USA_Nevada_SpiritCave_11000BP.SG	blueviolet	22	CentralAndes_LateHorizon_LH	Peru_CasaConcha2_LH.Capt	darkorange2	4	369514	3616	102175	660469	371202	445	83.42	128183	NA	NA	NA	NA	NA	NA	NA	NA
Mbuti	AHUR_2064	I0978	SouthernNorthAmerica_EH	USA_Nevada_SpiritCave_11000BP.SG	blueviolet	22	CentralAndes_MiddleHorizon_LH	Bolivia_MH_Tiwanaku.Capt	orange2	3	366708	4469	82063	131321	NA	NA	NA	NA	NA	NA	NA	NA	NA	NA	NA	NA
Mbuti	AHUR_2064	I2537	SouthernNorthAmerica_EH	USA_Nevada_SpiritCave_11000BP.SG	blueviolet	22	CentralAndes_LateIntermediate_LH	Chile_PicaOcho_700BP.Capt	orange1	3	369163	3648	101209	363868	37358	4961	75304	68860	NA	NA	NA	NA	NA	NA	NA	NA
Mbuti	AHUR_2064	I1484	SouthernNorthAmerica_EH	USA_Nevada_SpiritCave_11000BP.SG	blueviolet	22	CentralAndes_MiddleHorizon_LH	Peru_Laramate_900BP.Capt	orange2	8	368567	3538	104185	501803	368836	4453	82832	95172	NA	NA	NA	NA	NA	NA	NA	NA
Mbuti	AHUR_2064	I15176	SouthernNorthAmerica_EH	USA_Nevada_SpiritCave_11000BP.SG	blueviolet	22	California_Central_LH	USA_CA_CalaverasCounty_600BP.Capt	palevioletred1	7	371566	3795	97903	354213	374046	519	72071	67037	NA	NA	NA	NA	NA	NA	NA	NA
Mbuti	AHUR_2064	OTT-1165	SouthernNorthAmerica_EH	USA_Nevada_SpiritCave_11000BP.SG	blueviolet	22	CentralAndes_LateIntermediate_LH	Peru_Ollantaytambo_LIP.Capt	orange1	13	371513	3744	99242	416153	367626	4763	77.18	80457	NA	NA	NA	NA	NA	NA	NA	NA
Mbuti	AHUR_2064	I2236	SouthernNorthAmerica_EH	USA_Nevada_SpiritCave_11000BP.SG	blueviolet	22	CentralAndes_LateIntermediate_LH	Peru_Chanka_LIP.Capt	orange1	4	369924	4092	90.4	141394	NA	NA	NA	NA	NA	NA	NA	NA	NA	NA	NA	NA
Mbuti	AHUR_2064	OTT-1187	SouthernNorthAmerica_EH	USA_Nevada_SpiritCave_11000BP.SG	blueviolet	22	CentralAndes_LateIntermediate_LH	Peru_Ollantaytambo_LIP.Capt	orange1	13	366119	3488	104954	624662	366948	4467	82139	121536	NA	NA	NA	NA	NA	NA	NA	NA
Mbuti	AHUR_2064	SN-16	SouthernNorthAmerica_EH	USA_Nevada_SpiritCave_11000BP.SG	blueviolet	22	California_SouthernChannelIslands_LH	USA_CA_SanNicolas_1600BP.SG	violet	8	362594	4368	83004	91740	NA	NA	NA	NA	389427	4373	89062	383101	393887	4977	79137	119830
Mbuti	AHUR_2064	I2264	SouthernNorthAmerica_EH	USA_Nevada_SpiritCave_11000BP.SG	blueviolet	22	CentralAndes_LateIntermediate_LH	Peru_Highlands_LIP_Chimu.Capt	orange1	5	37107	3624	102405	519414	372093	4542	81927	99760	NA	NA	NA	NA	NA	NA	NA	NA
Mbuti	AHUR_2064	I14825	SouthernNorthAmerica_EH	USA_Nevada_SpiritCave_11000BP.SG	blueviolet	22	California_SouthernMainland_LH	USA_CA_Malibu_3400BP.Capt	palevioletred3	3	371959	3896	95461	238237	373513	5823	64145	44978	NA	NA	NA	NA	NA	NA	NA	NA
Mbuti	AHUR_2064	Sumidouro8	SouthernNorthAmerica_EH	USA_Nevada_SpiritCave_11000BP.SG	blueviolet	22	Brazil_EH	Brazil_Sumidouro_9800BP.SG	palegreen1	22	355223	4984	71276	79604	NA	NA	NA	NA	378756	4741	79891	345764	385546	5496	70145	112356
Mbuti	AHUR_2064	I2551	SouthernNorthAmerica_EH	USA_Nevada_SpiritCave_11000BP.SG	blueviolet	22	CentralAndes_MiddleHorizon_LH	Peru_Laramate_900BP.Capt	orange2	8	365197	3611	101121	554770	363242	4492	80862	106136	NA	NA	NA	NA	NA	NA	NA	NA
Mbuti	AHUR_2064	I1863	SouthernNorthAmerica_EH	USA_Nevada_SpiritCave_11000BP.SG	blueviolet	22	SouthernNorthAmerica_LH	Mexico_CoyoteCave_2750BP.Capt	blueviolet	8	34786	5648	61589	48483	NA	NA	NA	NA	NA	NA	NA	NA	NA	NA	NA	NA
Mbuti	AHUR_2064	I15172	SouthernNorthAmerica_EH	USA_Nevada_SpiritCave_11000BP.SG	blueviolet	22	California_Central_LH	USA_CA_CalaverasCounty_600BP.Capt	palevioletred1	7	369971	4432	83475	99189	NA	NA	NA	NA	NA	NA	NA	NA	NA	NA	NA	NA
Mbuti	AHUR_2064	333B	SouthernNorthAmerica_EH	USA_Nevada_SpiritCave_11000BP.SG	blueviolet	22	CentralAmerica_LH	Mexico_SierraGorda_Postclassic.SG	darkviolet	3	367189	3466	105944	722335	372392	4177	89156	141970	391882	416	94204	3511042	392378	4287	91524	1101161
Mbuti	AHUR_2064	I0038	SouthernNorthAmerica_EH	USA_Nevada_SpiritCave_11000BP.SG	blueviolet	22	CentralAndes_EH	Peru_Lauricocha_8600BP.Capt	darkorange4	22	369901	3712	99657	719031	371517	4442	83635	139979	NA	NA	NA	NA	NA	NA	NA	NA
Mbuti	AHUR_2064	I12354	SouthernNorthAmerica_EH	USA_Nevada_SpiritCave_11000BP.SG	blueviolet	22	SouthPatagonia_LH	Argentina_NorthTierradelFuego_Selknam_500BP.Capt	blue1	5	367528	3628	101316	658911	370857	4361	85036	127074	NA	NA	NA	NA	NA	NA	NA	NA
Mbuti	AHUR_2064	I17114	SouthernNorthAmerica_EH	USA_Nevada_SpiritCave_11000BP.SG	blueviolet	22	SouthernNorthAmerica_LH	Mexico_Tayopa_1000BP.Capt	blueviolet	5	357327	4746	75297	73687	NA	NA	NA	NA	NA	NA	NA	NA	NA	NA	NA	NA
Mbuti	AHUR_2064	I8576	SouthernNorthAmerica_EH	USA_Nevada_SpiritCave_11000BP.SG	blueviolet	22	SouthPatagonia_LH	Chile_NorthTierradelFuego_Selknam_100BP.Capt	blue1	6	372303	3642	102229	487078	374447	4505	83119	94748	NA	NA	NA	NA	NA	NA	NA	NA
Mbuti	AHUR_2064	AR0527	SouthernNorthAmerica_EH	USA_Nevada_SpiritCave_11000BP.SG	blueviolet	22	Uspallata	LH-MF|LH-F	goldenrod1	21	368701	3625	101711	516109	368974	4467	82607	101234	396754	4309	92085	2291303	397876	4446	89482	718712
Mbuti	AHUR_2064	LAR001	SouthernNorthAmerica_EH	USA_Nevada_SpiritCave_11000BP.SG	blueviolet	22	Brazil_MH	Brazil_Laranjal_6600BP.Capt	palegreen4	22	368545	3807	96819	290660	369002	5322	69339	55858	NA	NA	NA	NA	NA	NA	NA	NA
Mbuti	AHUR_2064	I2238	SouthernNorthAmerica_EH	USA_Nevada_SpiritCave_11000BP.SG	blueviolet	22	CentralAndes_EarlyIntermediate_LH	Peru_EIP_Moche.Capt	darkorange1	6	366302	4841	75671	79374	NA	NA	NA	NA	NA	NA	NA	NA	NA	NA	NA	NA
Mbuti	AHUR_2064	KCA-1364	SouthernNorthAmerica_EH	USA_Nevada_SpiritCave_11000BP.SG	blueviolet	22	CentralAndes_LateHorizon_LH	Peru_Kusicancha1_LH.Capt	darkorange2	8	368585	3549	103.85	603599	369507	4386	84245	117281	NA	NA	NA	NA	NA	NA	NA	NA
Mbuti	AHUR_2064	E8CdV	SouthernNorthAmerica_EH	USA_Nevada_SpiritCave_11000BP.SG	blueviolet	22	CentralAmerica_LH	Mexico_CanadaDeLaVirgen_MidClassic.SG	darkviolet	2	359441	3926	91552	221561	371487	6007	61843	43233	389772	4242	91882	1262475	388979	4514	86169	389179
Mbuti	AHUR_2064	SN-15	SouthernNorthAmerica_EH	USA_Nevada_SpiritCave_11000BP.SG	blueviolet	22	California_SouthernChannelIslands_LH	USA_CA_SanNicolas_1600BP.SG	violet	8	368013	4276	86057	146750	NA	NA	NA	NA	393543	4681	84069	659592	394549	5158	76486	211998
Mbuti	AHUR_2064	AR0521	SouthernNorthAmerica_EH	USA_Nevada_SpiritCave_11000BP.SG	blueviolet	22	Uspallata	LH-MF|LH-F	goldenrod1	21	365458	3488	104762	566379	373002	451	82704	111314	39027	3951	98773	2535375	392055	4107	95471	798341
Mbuti	AHUR_2064	MA577	SouthernNorthAmerica_EH	USA_Nevada_SpiritCave_11000BP.SG	blueviolet	22	SouthPatagonia_LH	Argentina_NorthTierradelFiego_Selknam_100BP.SG	blue1	4	367523	3543	103718	611760	369134	4308	85683	118454	394692	4227	93372	2794248	39512	4417	89462	855531
Mbuti	AHUR_2064	OTT-1174	SouthernNorthAmerica_EH	USA_Nevada_SpiritCave_11000BP.SG	blueviolet	22	CentralAndes_LateIntermediate_LH	Peru_Ollantaytambo_LIP.Capt	orange1	13	369338	3587	102974	458805	369433	4572	80811	88613	NA	NA	NA	NA	NA	NA	NA	NA
Mbuti	AHUR_2064	I11285	SouthernNorthAmerica_EH	USA_Nevada_SpiritCave_11000BP.SG	blueviolet	22	California_SouthernMainland_LH	USA_CA_LakeCachuma_400BP.Capt	palevioletred3	4	36809	3829	96124	248760	366476	5456	67171	46094	NA	NA	NA	NA	NA	NA	NA	NA
Mbuti	AHUR_2064	I2703	SouthernNorthAmerica_EH	USA_Nevada_SpiritCave_11000BP.SG	blueviolet	22	California_NorthernChannelIslands_LH	USA_CA_SantaRosa_300BP.Capt	violet	4	372817	3526	105745	578905	378227	4635	81599	110725	NA	NA	NA	NA	NA	NA	NA	NA
Mbuti	AHUR_2064	I2540	SouthernNorthAmerica_EH	USA_Nevada_SpiritCave_11000BP.SG	blueviolet	22	CentralAndes_MiddleHorizon_LH	Chile_CaletaHuelen_MH_1100BP.Capt	orange2	5	365924	3765	97196	283713	373423	5033	74199	54341	NA	NA	NA	NA	NA	NA	NA	NA
Mbuti	AHUR_2064	Lovelock2	SouthernNorthAmerica_EH	USA_Nevada_SpiritCave_11000BP.SG	blueviolet	22	SouthernNorthAmerica_LH	USA_Nevada_LovelockCave_1850BP.SG	blueviolet	1	36986	3652	101264	880062	371579	4114	90332	174880	398057	443	89863	4446155	397554	4525	87862	1410068
Mbuti	AHUR_2064	I11558	SouthernNorthAmerica_EH	USA_Nevada_SpiritCave_11000BP.SG	blueviolet	22	California_NorthernChannelIslands_MH	USA_CA_SantaRosa_7400BP.Capt	violet	21	369027	3818	96643	618043	367265	4416	83173	119314	NA	NA	NA	NA	NA	NA	NA	NA
Mbuti	AHUR_2064	Lovelock1	SouthernNorthAmerica_EH	USA_Nevada_SpiritCave_11000BP.SG	blueviolet	22	SouthernNorthAmerica_LH	USA_Nevada_LovelockCave_1850BP.SG	blueviolet	1	371776	3622	102648	668201	373644	4489	83238	132789	398181	4595	86648	3160883	397559	4728	84092	1003954
Mbuti	AHUR_2064	NC	SouthernNorthAmerica_EH	USA_Nevada_SpiritCave_11000BP.SG	blueviolet	22	California_SouthernMainland_LH	USA_CA_NewCuyama_1300BP.SG	palevioletred3	1	366469	3645	100541	338334	365572	4829	75.7	66347	393539	4063	96.85	1464109	397166	4356	91186	457103
Mbuti	AHUR_2064	SC-05	SouthernNorthAmerica_EH	USA_Nevada_SpiritCave_11000BP.SG	blueviolet	22	California_SouthernChannelIslands_LH	USA_CA_SanClemente_900BP.SG	violet	7	3624	3503	103447	844968	367815	4184	87.91	166744	390903	4178	93568	3882335	392306	4329	90631	1224688
Mbuti	AHUR_2064	I0758	SouthernNorthAmerica_EH	USA_Nevada_SpiritCave_11000BP.SG	blueviolet	22	California_SouthernChannelIslands_LH	USA_CA_SanClemente_500BP.Capt	violet	9	363546	3489	104208	524785	368379	4434	83072	101763	NA	NA	NA	NA	NA	NA	NA	NA
Mbuti	AHUR_2064	I11968	SouthernNorthAmerica_EH	USA_Nevada_SpiritCave_11000BP.SG	blueviolet	22	California_NorthernChannelIslands_LH	USA_CA_SantaRosa_3200BP.Capt	violet	5	371411	3732	99519	364957	373816	5018	74502	70211	NA	NA	NA	NA	NA	NA	NA	NA
Mbuti	AHUR_2064	I12355	SouthernNorthAmerica_EH	USA_Nevada_SpiritCave_11000BP.SG	blueviolet	22	SouthPatagonia_LH	Argentina_BeagleChannel_Yamana_1500BP.Capt	blue1	2	367446	3644	100842	466359	367495	483	76085	88276	NA	NA	NA	NA	NA	NA	NA	NA
Mbuti	AHUR_2064	I11967	SouthernNorthAmerica_EH	USA_Nevada_SpiritCave_11000BP.SG	blueviolet	22	California_NorthernChannelIslands_LH	USA_CA_SantaRosa_300BP.Capt	violet	4	372255	3568	104.34	606719	372422	4558	81711	116831	NA	NA	NA	NA	NA	NA	NA	NA
Mbuti	AHUR_2064	Lapa15	SouthernNorthAmerica_EH	USA_Nevada_SpiritCave_11000BP.SG	blueviolet	22	Brazil_EH	Brazil_LapaDoSanto_9600BP.Capt	palegreen1	21	360626	3914	92137	433946	363467	4972	73106	82093	NA	NA	NA	NA	NA	NA	NA	NA
Mbuti	AHUR_2064	I12942	SouthernNorthAmerica_EH	USA_Nevada_SpiritCave_11000BP.SG	blueviolet	22	SouthPatagonia_LH	Argentina_BeagleChannel_Yamana_100BP.Capt	blue1	1	367862	3949	93164	208605	36626	5933	61736	39638	NA	NA	NA	NA	NA	NA	NA	NA
Mbuti	AHUR_2064	SC-01	SouthernNorthAmerica_EH	USA_Nevada_SpiritCave_11000BP.SG	blueviolet	22	California_SouthernChannelIslands_LH	USA_CA_SanClemente_900BP.SG	violet	7	358841	4233	84781	152586	NA	NA	NA	NA	386089	4386	88037	667109	387312	501	77302	213110
Mbuti	AHUR_2064	AR0526	SouthernNorthAmerica_EH	USA_Nevada_SpiritCave_11000BP.SG	blueviolet	22	Uspallata	LH-MF|LH-F	goldenrod1	21	366675	3555	103157	688032	374699	4359	85962	135601	395754	4345	91093	3139475	397965	4537	87708	993307
Mbuti	AHUR_2064	Lapa14	SouthernNorthAmerica_EH	USA_Nevada_SpiritCave_11000BP.SG	blueviolet	22	Brazil_EH	Brazil_LapaDoSanto_9600BP.Capt	palegreen1	21	363082	3624	100186	329179	36823	5175	71151	61456	NA	NA	NA	NA	NA	NA	NA	NA
Mbuti	AHUR_2064	KMA-28-1	SouthernNorthAmerica_EH	USA_Nevada_SpiritCave_11000BP.SG	blueviolet	22	CentralAndes_LateHorizon_LH	Peru_Kanamarka1_LH.Capt	darkorange2	5	369833	332	111409	654515	372655	4163	89522	127473	NA	NA	NA	NA	NA	NA	NA	NA
Mbuti	AHUR_2064	I2243	SouthernNorthAmerica_EH	USA_Nevada_SpiritCave_11000BP.SG	blueviolet	22	CentralAndes_MiddleHorizonLateIntermeditae_LH	Peru_MH_LIP_Lambayeque.Capt	darkorange3	2	370986	5151	72023	53487	NA	NA	NA	NA	NA	NA	NA	NA	NA	NA	NA	NA
Mbuti	AHUR_2064	I2237	SouthernNorthAmerica_EH	USA_Nevada_SpiritCave_11000BP.SG	blueviolet	22	CentralAndes_EarlyIntermediate_LH	Peru_ElBrujo_EIP_1300BP.Capt	darkorange1	1	370061	3913	94561	256270	368741	55	67038	49116	NA	NA	NA	NA	NA	NA	NA	NA
Mbuti	AHUR_2064	I21250	SouthernNorthAmerica_EH	USA_Nevada_SpiritCave_11000BP.SG	blueviolet	22	California_SouthernMainland_LH	USA_CA_Goleta_900BP.Capt	palevioletred3	5	366544	368	99605	519896	364192	4712	77283	99050	NA	NA	NA	NA	NA	NA	NA	NA
Mbuti	AHUR_2064	I0966	SouthernNorthAmerica_EH	USA_Nevada_SpiritCave_11000BP.SG	blueviolet	22	CentralAndes_LateIntermediate_LH	Peru_LIP_Ychsma.Capt	orange1	9	365825	4286	85345	163493	NA	NA	NA	NA	NA	NA	NA	NA	NA	NA	NA	NA
Mbuti	AHUR_2064	I1867	SouthernNorthAmerica_EH	USA_Nevada_SpiritCave_11000BP.SG	blueviolet	22	SouthernNorthAmerica_LH	Mexico_SanLorenzo_700BP.Capt	blueviolet	6	340993	4734	72035	63202	NA	NA	NA	NA	NA	NA	NA	NA	NA	NA	NA	NA
Mbuti	AHUR_2064	I0748	SouthernNorthAmerica_EH	USA_Nevada_SpiritCave_11000BP.SG	blueviolet	22	California_SouthernChannelIslands_LH	USA_CA_SanClemente_500BP.Capt	violet	9	364532	3616	100819	651437	368331	4297	85725	126482	NA	NA	NA	NA	NA	NA	NA	NA
Mbuti	AHUR_2064	I12364	SouthernNorthAmerica_EH	USA_Nevada_SpiritCave_11000BP.SG	blueviolet	22	SouthPatagonia_LH	Argentina_NorthTierradelFuego_Selknam_500BP.Capt	blue1	5	374112	4284	87335	142237	NA	NA	NA	NA	NA	NA	NA	NA	NA	NA	NA	NA
Mbuti	AHUR_2064	LAR002	SouthernNorthAmerica_EH	USA_Nevada_SpiritCave_11000BP.SG	blueviolet	22	Brazil_MH	Brazil_Laranjal_6800BP.Capt	palegreen4	23	365602	3893	93905	217265	362989	5858	61967	41531	NA	NA	NA	NA	NA	NA	NA	NA
Mbuti	AHUR_2064	I2230	SouthernNorthAmerica_EH	USA_Nevada_SpiritCave_11000BP.SG	blueviolet	22	Pampa_MH	Argentina_ArroyoSeco2_7700BP.Capt	lightblue	22	372251	3664	101606	586869	374342	4482	83514	113753	NA	NA	NA	NA	NA	NA	NA	NA
Mbuti	AHUR_2064	I2244	SouthernNorthAmerica_EH	USA_Nevada_SpiritCave_11000BP.SG	blueviolet	22	CentralAndes_MiddleHorizonLateIntermeditae_LH	Peru_MH_LIP_Lambayeque.Capt	darkorange3	2	365445	3532	103454	452212	366756	4549	80626	87276	NA	NA	NA	NA	NA	NA	NA	NA
Mbuti	AHUR_2064	I12357	SouthernNorthAmerica_EH	USA_Nevada_SpiritCave_11000BP.SG	blueviolet	22	SouthPatagonia_LH	Argentina_MitrePeninsula_Haush_400BP.Capt	blue1	3	371573	3849	96543	407226	37495	4921	76201	77093	NA	NA	NA	NA	NA	NA	NA	NA
Mbuti	AHUR_2064	SN-10	SouthernNorthAmerica_EH	USA_Nevada_SpiritCave_11000BP.SG	blueviolet	22	California_SouthernChannelIslands_LH	USA_CA_SanNicolas_1600BP.SG	violet	8	358487	3958	90565	188511	NA	NA	NA	NA	390039	4211	92623	792717	390953	4494	86995	248618
Mbuti	AHUR_2064	I0965	SouthernNorthAmerica_EH	USA_Nevada_SpiritCave_11000BP.SG	blueviolet	22	CentralAndes_LateIntermediate_LH	Peru_Lima_LIP_650BP.Capt	orange1	6	367945	4143	88807	116222	NA	NA	NA	NA	NA	NA	NA	NA	NA	NA	NA	NA
Mbuti	AHUR_2064	2417J	SouthernNorthAmerica_EH	USA_Nevada_SpiritCave_11000BP.SG	blueviolet	22	CentralAmerica_LH	Mexico_SierraGorda_Postclassic.SG	darkviolet	3	364391	3426	106355	607607	371312	4303	86292	119855	388743	3995	97303	2920373	390156	4101	95126	918552
Mbuti	AHUR_2064	I14826	SouthernNorthAmerica_EH	USA_Nevada_SpiritCave_11000BP.SG	blueviolet	22	California_SouthernMainland_LH	USA_CA_Malibu_3400BP.Capt	palevioletred3	3	36897	4297	85872	135951	NA	NA	NA	NA	NA	NA	NA	NA	NA	NA	NA	NA
Mbuti	AHUR_2064	Yaghan890	SouthernNorthAmerica_EH	USA_Nevada_SpiritCave_11000BP.SG	blueviolet	22	SouthPatagonia_LH	Argentina_BeagleChannel_Yamana_100BP.SG	blue1	1	357356	4383	81527	141603	NA	NA	NA	NA	393155	414	94959	776429	401251	4679	85752	223613
Mbuti	AHUR_2064	PS-09	SouthernNorthAmerica_EH	USA_Nevada_SpiritCave_11000BP.SG	blueviolet	22	California_SouthernMainland_LH	USA_CA_PointSal_1500BP.SG	palevioletred3	2	365635	5007	73032	67938	NA	NA	NA	NA	389939	4594	84878	296501	395614	5341	74067	92448
Mbuti	AHUR_2064	I0238	SouthernNorthAmerica_EH	USA_Nevada_SpiritCave_11000BP.SG	blueviolet	22	CentralAndes_EH	Peru_Lauricocha_8600BP.Capt	darkorange4	22	363667	5331	68222	59237	NA	NA	NA	NA	NA	NA	NA	NA	NA	NA	NA	NA
Mbuti	AHUR_2064	SHN-212	SouthernNorthAmerica_EH	USA_Nevada_SpiritCave_11000BP.SG	blueviolet	22	CentralAndes_LateHorizon_LH	Peru_Sacsahuaman1_LH.Capt	darkorange2	12	361734	4472	80891	87449	NA	NA	NA	NA	NA	NA	NA	NA	NA	NA	NA	NA
Mbuti	AHUR_2064	I11969	SouthernNorthAmerica_EH	USA_Nevada_SpiritCave_11000BP.SG	blueviolet	22	California_NorthernChannelIslands_LH	USA_CA_SantaRosa_3200BP.Capt	violet	5	369455	375	98525	624960	371119	4412	84114	120158	NA	NA	NA	NA	NA	NA	NA	NA
Mbuti	AHUR_2064	I1358	SouthernNorthAmerica_EH	USA_Nevada_SpiritCave_11000BP.SG	blueviolet	22	CentralAndes_LateIntermediate_LH	Peru_LIP_Pacapaccari_600BP.Capt	orange1	8	371595	354	104973	410719	376892	4794	78623	78695	NA	NA	NA	NA	NA	NA	NA	NA
Mbuti	AHUR_2064	SN-17	SouthernNorthAmerica_EH	USA_Nevada_SpiritCave_11000BP.SG	blueviolet	22	California_SouthernChannelIslands_MH	USA_CA_SanNicolas_4800BP.SG	violet	23	369409	3828	96503	755367	374586	4432	84512	149944	396597	4513	87883	3429210	398402	4665	85401	1099140
Mbuti	AHUR_2064	I0237	SouthernNorthAmerica_EH	USA_Nevada_SpiritCave_11000BP.SG	blueviolet	22	CentralAndes_MiddleHorizon_LH	Peru_Laramate_900BP.Capt	orange2	8	370608	3878	95574	280756	366346	5386	68014	52250	NA	NA	NA	NA	NA	NA	NA	NA
Mbuti	AHUR_2064	SC-06	SouthernNorthAmerica_EH	USA_Nevada_SpiritCave_11000BP.SG	blueviolet	22	California_SouthernChannelIslands_LH	USA_CA_SanClemente_900BP.SG	violet	7	369546	4638	79676	127289	NA	NA	NA	NA	400426	4701	85183	545339	400659	4909	81616	172362
Mbuti	AHUR_2064	AR0151	SouthernNorthAmerica_EH	USA_Nevada_SpiritCave_11000BP.SG	blueviolet	22	Uspallata	LH-HG|LH-HG	darkorange4	23	364134	3782	96293	280538	365166	5138	71073	56650	391083	4414	88.61	1399971	388009	4502	86187	450308
Mbuti	AHUR_2064	I2544	SouthernNorthAmerica_EH	USA_Nevada_SpiritCave_11000BP.SG	blueviolet	22	CentralAndes_LateIntermediate_LH	Peru_Chanka_LIP.Capt	orange1	4	368512	3483	105802	609256	369957	4186	88379	117288	NA	NA	NA	NA	NA	NA	NA	NA
Mbuti	AHUR_2064	I17113	SouthernNorthAmerica_EH	USA_Nevada_SpiritCave_11000BP.SG	blueviolet	22	SouthernNorthAmerica_LH	Mexico_Tayopa_1000BP.Capt	blueviolet	5	35334	4299	82196	93634	NA	NA	NA	NA	NA	NA	NA	NA	NA	NA	NA	NA
Mbuti	AHUR_2064	I2705	SouthernNorthAmerica_EH	USA_Nevada_SpiritCave_11000BP.SG	blueviolet	22	California_NorthernChannelIslands_LH	USA_CA_SantaRosa_300BP.Capt	violet	4	370833	3661	101295	512049	370703	4669	79393	96817	NA	NA	NA	NA	NA	NA	NA	NA
Mbuti	AHUR_2064	AR0506	SouthernNorthAmerica_EH	USA_Nevada_SpiritCave_11000BP.SG	blueviolet	22	Uspallata	LH-MF|LH-F	goldenrod1	21	365871	356	102782	440868	373573	4742	78773	86025	392718	4065	96603	1945285	395912	425	93154	608269
Mbuti	AHUR_2064	Yaghan894	SouthernNorthAmerica_EH	USA_Nevada_SpiritCave_11000BP.SG	blueviolet	22	SouthPatagonia_LH	Argentina_BeagleChannel_Yamana_100BP.SG	blue1	1	364094	3773	96495	389954	362921	4958	73194	73679	396277	4126	96054	1797952	399122	4302	92777	538341
Mbuti	AHUR_2064	SN-01	SouthernNorthAmerica_EH	USA_Nevada_SpiritCave_11000BP.SG	blueviolet	22	California_SouthernChannelIslands_LH	USA_CA_SanNicolas_1600BP.SG	violet	8	36096	4871	74106	72573	NA	NA	NA	NA	390072	4533	86045	307278	394551	5325	74.1	97216
Mbuti	AHUR_2064	SC-03	SouthernNorthAmerica_EH	USA_Nevada_SpiritCave_11000BP.SG	blueviolet	22	California_SouthernChannelIslands_LH	USA_CA_SanClemente_900BP.SG	violet	7	360733	372	96969	320800	364661	5287	68969	62418	392152	4388	89359	1381080	39495	4716	83738	428501
Mbuti	AHUR_2064	I0752	SouthernNorthAmerica_EH	USA_Nevada_SpiritCave_11000BP.SG	blueviolet	22	California_SouthernChannelIslands_LH	USA_CA_SanClemente_500BP.Capt	violet	9	362844	4066	89.23	163480	NA	NA	NA	NA	NA	NA	NA	NA	NA	NA	NA	NA
Mbuti	AHUR_2064	KMA-19-1	SouthernNorthAmerica_EH	USA_Nevada_SpiritCave_11000BP.SG	blueviolet	22	CentralAndes_LateHorizon_LH	Peru_Kanamarka3_LH.Capt	darkorange2	7	362191	3632	99732	656791	363092	4316	84126	127350	NA	NA	NA	NA	NA	NA	NA	NA
Mbuti	AHUR_2064	KMA-15A-1	SouthernNorthAmerica_EH	USA_Nevada_SpiritCave_11000BP.SG	blueviolet	22	CentralAndes_LateHorizon_LH	Peru_Kanamarka1_LH.Capt	darkorange2	5	368062	3628	101453	678712	371216	4397	84426	131961	NA	NA	NA	NA	NA	NA	NA	NA
Mbuti	AHUR_2064	I0964	SouthernNorthAmerica_EH	USA_Nevada_SpiritCave_11000BP.SG	blueviolet	22	CentralAndes_LateIntermediate_LH	Peru_Lima_LIP_650BP.Capt	orange1	6	368601	5159	71444	63009	NA	NA	NA	NA	NA	NA	NA	NA	NA	NA	NA	NA
Mbuti	AHUR_2064	Enoque65	SouthernNorthAmerica_EH	USA_Nevada_SpiritCave_11000BP.SG	blueviolet	22	Brazil_MH	Brazil_Enoque_3500BP.SG	palegreen4	21	NA	NA	NA	NA	NA	NA	NA	NA	392639	5281	74343	134173	NA	NA	NA	NA
Mbuti	AHUR_2064	SN-32	SouthernNorthAmerica_EH	USA_Nevada_SpiritCave_11000BP.SG	blueviolet	22	California_SouthernChannelIslands_MH	USA_CA_SanNicolas_4800BP.SG	violet	23	372829	5135	72.61	79928	NA	NA	NA	NA	398889	4837	82458	343453	401726	5693	70559	108792
Mbuti	AHUR_2064	Anzick	SouthernNorthAmerica_EH	USA_Nevada_SpiritCave_11000BP.SG	blueviolet	22	SouthernNorthAmerica_EH	USA_Anzick.SG	blueviolet	21	364961	3685	99045	868814	367719	424	86.72	171951	391154	4492	87073	4314624	393329	4652	84552	1360059
Mbuti	AHUR_2064	I2709	SouthernNorthAmerica_EH	USA_Nevada_SpiritCave_11000BP.SG	blueviolet	22	California_NorthernChannelIslands_MH	USA_CA_SantaRosa_4900BP.Capt	violet	22	373308	4246	87918	228602	3784	6292	60136	42574	NA	NA	NA	NA	NA	NA	NA	NA
Mbuti	AHUR_2064	SM-02	SouthernNorthAmerica_EH	USA_Nevada_SpiritCave_11000BP.SG	blueviolet	22	California_NorthernChannelIslands_LH	USA_CA_SanMiguel_650BP.SG	violet	1	3716	367	101263	722430	376088	4403	85414	142026	402954	4483	89888	3241006	403699	4618	87417	1023043
Mbuti	AHUR_2064	MIS7	SouthernNorthAmerica_EH	USA_Nevada_SpiritCave_11000BP.SG	blueviolet	22	CentralAndes_MiddleHorizon_LH	Bolivia_MiraFlores_MH.Capt	orange2	4	367409	3715	98.91	513617	365664	4619	79166	99197	NA	NA	NA	NA	NA	NA	NA	NA
Mbuti	AHUR_2064	SJArg-1	SouthernNorthAmerica_EH	USA_Nevada_SpiritCave_11000BP.SG	blueviolet	22	Cuyo_LH	Argentina_Callingasta_1500BP.SG	brown3	1	368203	4155	88.62	151572	NA	NA	NA	NA	394013	4584	85951	659617	40372	4982	81036	202670
Mbuti	AHUR_2064	I0760	SouthernNorthAmerica_EH	USA_Nevada_SpiritCave_11000BP.SG	blueviolet	22	California_SouthernChannelIslands_LH	USA_CA_SanClemente_500BP.Capt	violet	9	361483	3449	104809	671599	364757	4335	84151	130543	NA	NA	NA	NA	NA	NA	NA	NA
Mbuti	AHUR_2064	AR0505	SouthernNorthAmerica_EH	USA_Nevada_SpiritCave_11000BP.SG	blueviolet	22	Uspallata	LH-MF|LH-F	goldenrod1	21	36902	3588	102839	836959	376045	4268	88.11	164896	398228	4456	89364	3863954	400483	456	87831	1214565
Mbuti	AHUR_2064	Lapa05	SouthernNorthAmerica_EH	USA_Nevada_SpiritCave_11000BP.SG	blueviolet	22	Brazil_EH	Brazil_LapaDoSanto_9600BP.Capt	palegreen1	21	356172	4615	77178	101950	NA	NA	NA	NA	NA	NA	NA	NA	NA	NA	NA	NA
Mbuti	AHUR_2064	SN_50	SouthernNorthAmerica_EH	USA_Nevada_SpiritCave_11000BP.SG	blueviolet	22	California_SouthernChannelIslands_LH	USA_CA_SanNicolas_1600BP.SG	violet	8	369804	3738	98935	309641	371859	51	72912	60490	395616	4426	89377	1335088	396314	4738	83644	419998
Mbuti	AHUR_2064	I0755	SouthernNorthAmerica_EH	USA_Nevada_SpiritCave_11000BP.SG	blueviolet	22	California_SouthernChannelIslands_LH	USA_CA_SanClemente_500BP.Capt	violet	9	367892	3726	98743	343990	366525	4955	73975	66828	NA	NA	NA	NA	NA	NA	NA	NA
Mbuti	AHUR_2064	I2262	SouthernNorthAmerica_EH	USA_Nevada_SpiritCave_11000BP.SG	blueviolet	22	CentralAndes_EarlyIntermediate_LH	Peru_EIP_Moche.Capt	darkorange1	6	368911	4833	76324	72827	NA	NA	NA	NA	NA	NA	NA	NA	NA	NA	NA	NA
Mbuti	AHUR_2064	I1396	SouthernNorthAmerica_EH	USA_Nevada_SpiritCave_11000BP.SG	blueviolet	22	CentralAndes_LateIntermediate_LH	Peru_LIP_Pacapaccari_600BP.Capt	orange1	8	357184	5547	64397	51347	NA	NA	NA	NA	NA	NA	NA	NA	NA	NA	NA	NA
Mbuti	AHUR_2064	PS-07	SouthernNorthAmerica_EH	USA_Nevada_SpiritCave_11000BP.SG	blueviolet	22	California_SouthernMainland_LH	USA_CA_PointSal_1500BP.SG	palevioletred3	2	374012	4129	90586	171913	NA	NA	NA	NA	397977	4232	94031	697583	40027	4659	85907	216682
Mbuti	AHUR_2064	Lapa25	SouthernNorthAmerica_EH	USA_Nevada_SpiritCave_11000BP.SG	blueviolet	22	Brazil_EH	Brazil_LapaDoSanto_9600BP.Capt	palegreen1	21	365987	3819	95836	394596	363373	4853	74875	74885	NA	NA	NA	NA	NA	NA	NA	NA
Mbuti	AHUR_2064	I1753	SouthernNorthAmerica_EH	USA_Nevada_SpiritCave_11000BP.SG	blueviolet	22	CentralChile_MH	Chile_LosRieles_5100BP.Capt	brown1	23	366432	3694	99204	569863	365314	4559	80136	109384	NA	NA	NA	NA	NA	NA	NA	NA
Mbuti	AHUR_2064	BC25	SouthernNorthAmerica_EH	USA_Nevada_SpiritCave_11000BP.SG	blueviolet	22	California_Baja_LH	Mexico_Pericues.SG	palevioletred1	3	354893	4485	79133	102508	NA	NA	NA	NA	38865	4401	88307	455305	391716	508	77106	136184
Mbuti	AHUR_2064	SN-25	SouthernNorthAmerica_EH	USA_Nevada_SpiritCave_11000BP.SG	blueviolet	22	California_SouthernChannelIslands_MH	USA_CA_SanNicolas_4800BP.SG	violet	23	371318	584	63579	44790	NA	NA	NA	NA	400314	5261	76088	196904	403504	6231	64754	63304
Mbuti	AHUR_2064	SA5832	SouthernNorthAmerica_EH	USA_Nevada_SpiritCave_11000BP.SG	blueviolet	22	SouthPatagonia_MH	Chile_PuntaSantaAna_7300BP.SG	blue3	22	364634	3649	99.92	574533	370498	4553	81373	112501	390773	4392	88.98	2729189	394153	4596	85761	852015
Mbuti	AHUR_2064	I2708	SouthernNorthAmerica_EH	USA_Nevada_SpiritCave_11000BP.SG	blueviolet	22	California_NorthernChannelIslands_LH	USA_CA_SantaRosa_3000BP.Capt	violet	3	371089	4572	81165	123078	NA	NA	NA	NA	NA	NA	NA	NA	NA	NA	NA	NA
Mbuti	AHUR_2064	I0751	SouthernNorthAmerica_EH	USA_Nevada_SpiritCave_11000BP.SG	blueviolet	22	California_SouthernChannelIslands_LH	USA_CA_SanClemente_500BP.Capt	violet	9	368638	3497	105426	669157	372945	4398	84789	130189	NA	NA	NA	NA	NA	NA	NA	NA
Mbuti	AHUR_2064	I14009	SouthernNorthAmerica_EH	USA_Nevada_SpiritCave_11000BP.SG	blueviolet	22	CentralAndes_LateIntermediate_LH	Chile_LIP_Pukara_700BP.Capt	orange1	2	369495	4336	85215	134870	NA	NA	NA	NA	NA	NA	NA	NA	NA	NA	NA	NA
Mbuti	AHUR_2064	AR0501	SouthernNorthAmerica_EH	USA_Nevada_SpiritCave_11000BP.SG	blueviolet	22	Uspallata	LH-MF|LH-F	goldenrod1	21	36971	397	93117	229585	377903	5892	64135	44610	396413	4455	88989	1010844	400198	4824	82967	316951
Mbuti	AHUR_2064	I2704	SouthernNorthAmerica_EH	USA_Nevada_SpiritCave_11000BP.SG	blueviolet	22	California_NorthernChannelIslands_LH	USA_CA_SantaRosa_300BP.Capt	violet	4	367807	3569	103065	549654	369575	4481	82472	104081	NA	NA	NA	NA	NA	NA	NA	NA
Mbuti	AHUR_2064	I2557	SouthernNorthAmerica_EH	USA_Nevada_SpiritCave_11000BP.SG	blueviolet	22	CentralAndes_EarlyIntermediate_LH	Peru_Ullujaya_EIP_1350BP.Capt	darkorange1	5	365201	3739	97666	294133	362418	5247	69073	55535	NA	NA	NA	NA	NA	NA	NA	NA
Mbuti	AHUR_2064	SN-03	SouthernNorthAmerica_EH	USA_Nevada_SpiritCave_11000BP.SG	blueviolet	22	California_SouthernChannelIslands_LH	USA_CA_SanNicolas_1600BP.SG	violet	8	369875	4151	89112	178883	NA	NA	NA	NA	394379	4582	86067	789202	393085	4807	81769	254647
Mbuti	AHUR_2064	OTT-1144	SouthernNorthAmerica_EH	USA_Nevada_SpiritCave_11000BP.SG	blueviolet	22	CentralAndes_LateIntermediate_LH	Peru_Ollantaytambo_LIP.Capt	orange1	13	369179	3528	104631	572079	373065	4442	83977	110764	NA	NA	NA	NA	NA	NA	NA	NA
Mbuti	AHUR_2064	AR0504	SouthernNorthAmerica_EH	USA_Nevada_SpiritCave_11000BP.SG	blueviolet	22	Uspallata	LH-MF|LH-F	goldenrod1	21	365988	3394	107848	844217	372388	411	90597	166512	39291	4188	93819	3910790	394691	4303	91718	1234886
Mbuti	AHUR_2064	I2707	SouthernNorthAmerica_EH	USA_Nevada_SpiritCave_11000BP.SG	blueviolet	22	California_NorthernChannelIslands_LH	USA_CA_SantaRosa_300BP.Capt	violet	4	371926	3592	103539	599571	371669	4255	87345	114856	NA	NA	NA	NA	NA	NA	NA	NA
Mbuti	AHUR_2064	B-04	SouthernNorthAmerica_EH	USA_Nevada_SpiritCave_11000BP.SG	blueviolet	22	California_Baja_LH	Mexico_Baja_Comondu_Unknown.SG	palevioletred1	1	354463	5633	62924	45084	NA	NA	NA	NA	390533	4844	80619	194905	391862	5771	67907	61424
Mbuti	AHUR_2064	I3565	SouthernNorthAmerica_EH	USA_Nevada_SpiritCave_11000BP.SG	blueviolet	22	California_NorthernChannelIslands_LH	USA_CA_SantaRosa_3000BP.Capt	violet	3	372323	4025	92496	582588	378422	4876	77602	111196	NA	NA	NA	NA	NA	NA	NA	NA
Mbuti	AHUR_2064	CT-01	SouthernNorthAmerica_EH	USA_Nevada_SpiritCave_11000BP.SG	blueviolet	22	California_SouthernChannelIslands_LH	USA_CA_SanCatalina_400BP.SG	violet	6	365272	3485	104799	803168	369551	426	86742	158948	393173	4293	91578	3635704	394678	4401	89685	1150636
Mbuti	AHUR_2064	Lovelock3	SouthernNorthAmerica_EH	USA_Nevada_SpiritCave_11000BP.SG	blueviolet	22	SouthernNorthAmerica_LH	USA_Nevada_LovelockCave_600BP.SG	blueviolet	2	371278	352	105462	880111	376087	4157	90474	174970	396582	427	92875	4461482	396127	4375	90.54	1414357
Mbuti	AHUR_2064	SN-53	SouthernNorthAmerica_EH	USA_Nevada_SpiritCave_11000BP.SG	blueviolet	22	California_SouthernChannelIslands_LH	USA_CA_SanNicolas_1600BP.SG	violet	8	363162	3941	92143	201979	361628	6173	58582	39509	392407	4412	88932	857472	39345	4892	80431	267599
Mbuti	AHUR_2064	Lapa24	SouthernNorthAmerica_EH	USA_Nevada_SpiritCave_11000BP.SG	blueviolet	22	Brazil_EH	Brazil_LapaDoSanto_9200BP.Capt	palegreen1	21	365003	3769	96.84	481816	365341	4791	76258	92174	NA	NA	NA	NA	NA	NA	NA	NA
Mbuti	AHUR_2064	I12941	SouthernNorthAmerica_EH	USA_Nevada_SpiritCave_11000BP.SG	blueviolet	22	SouthPatagonia_LH	Argentina_BeagleChannel_Yamana_100BP.Capt	blue1	1	369903	364	101634	619027	368102	43	85598	118917	NA	NA	NA	NA	NA	NA	NA	NA
Mbuti	AHUR_2064	MOS001	SouthernNorthAmerica_EH	USA_Nevada_SpiritCave_11000BP.SG	blueviolet	22	Brazil_MH	Brazil_Moraes_5800BP.Capt	palegreen4	24	365092	394	92673	188110	NA	NA	NA	NA	NA	NA	NA	NA	NA	NA	NA	NA
Mbuti	AHUR_2064	I8348	SouthernNorthAmerica_EH	USA_Nevada_SpiritCave_11000BP.SG	blueviolet	22	Pampa_MH	Argentina_LagunaChica_6800BP.Capt	lightblue	23	367255	4402	83426	121374	NA	NA	NA	NA	NA	NA	NA	NA	NA	NA	NA	NA
Mbuti	AHUR_2064	I0045	SouthernNorthAmerica_EH	USA_Nevada_SpiritCave_11000BP.SG	blueviolet	22	CentralAndes_EarlyIntermediate_LH	Peru_Lima_EIP_1450BP.Capt	darkorange1	2	366452	4056	90.35	200024	NA	NA	NA	NA	NA	NA	NA	NA	NA	NA	NA	NA
Mbuti	AHUR_2064	I0756	SouthernNorthAmerica_EH	USA_Nevada_SpiritCave_11000BP.SG	blueviolet	22	California_SouthernChannelIslands_LH	USA_CA_SanClemente_500BP.Capt	violet	9	357225	349	102359	602787	357678	4247	84213	117162	NA	NA	NA	NA	NA	NA	NA	NA
Mbuti	AHUR_2064	I1485	SouthernNorthAmerica_EH	USA_Nevada_SpiritCave_11000BP.SG	blueviolet	22	CentralAndes_MiddleHorizon_LH	Peru_Laramate_900BP.Capt	orange2	8	368034	3636	101216	507021	36829	4662	79005	96612	NA	NA	NA	NA	NA	NA	NA	NA
Mbuti	AHUR_2064	I1754	SouthernNorthAmerica_EH	USA_Nevada_SpiritCave_11000BP.SG	blueviolet	22	CentralChile_LH	Chile_Conchali_700BP.Capt	brown1	1	367216	3515	104461	609254	371546	4375	84927	117187	NA	NA	NA	NA	NA	NA	NA	NA
Mbuti	AHUR_2064	QKI-809	SouthernNorthAmerica_EH	USA_Nevada_SpiritCave_11000BP.SG	blueviolet	22	CentralAndes_LateHorizon_LH	Peru_Qotakalli1_LH.Capt	darkorange2	10	367264	3449	106.47	605741	366839	4215	87022	117915	NA	NA	NA	NA	NA	NA	NA	NA
Mbuti	AHUR_2064	I0967	SouthernNorthAmerica_EH	USA_Nevada_SpiritCave_11000BP.SG	blueviolet	22	CentralAndes_LateIntermediate_LH	Peru_LIP_Ychsma.Capt	orange1	9	366194	4189	87.42	145891	NA	NA	NA	NA	NA	NA	NA	NA	NA	NA	NA	NA
Mbuti	AHUR_2064	AR0510	SouthernNorthAmerica_EH	USA_Nevada_SpiritCave_11000BP.SG	blueviolet	22	Uspallata	LH-MF|LH-F	goldenrod1	21	363889	351	103658	767361	365721	4209	86885	151763	389179	4377	88.92	3611618	390019	449	86862	1144261
Mbuti	AHUR_2064	IO2	SouthernNorthAmerica_EH	USA_Nevada_SpiritCave_11000BP.SG	blueviolet	22	CentralAndes_MiddleHorizon_LH	Bolivia_MH_Iroco_1050BP.Capt	orange2	1	369122	3823	96547	414222	36373	5037	72208	80246	NA	NA	NA	NA	NA	NA	NA	NA
Mbuti	AHUR_2064	I12358	SouthernNorthAmerica_EH	USA_Nevada_SpiritCave_11000BP.SG	blueviolet	22	SouthPatagonia_LH	Argentina_MitrePeninsula_Haush_400BP.Capt	blue1	3	369518	3511	105238	552615	372287	4387	84864	106187	NA	NA	NA	NA	NA	NA	NA	NA
Mbuti	AHUR_2064	Ala1	SouthernNorthAmerica_EH	USA_Nevada_SpiritCave_11000BP.SG	blueviolet	22	California_Central_LH	USA_CA_SanFranciscoBay_300BP.SG	palevioletred1	5	370165	3915	94561	276297	380904	5543	68719	55603	394025	4481	87934	1315587	39373	4712	83556	426880
Mbuti	AHUR_2064	KCA-1298	SouthernNorthAmerica_EH	USA_Nevada_SpiritCave_11000BP.SG	blueviolet	22	CentralAndes_LateHorizon_LH	Peru_Kusicancha1_LH.Capt	darkorange2	8	367929	3519	104564	556648	371793	4364	85.2	107483	NA	NA	NA	NA	NA	NA	NA	NA
Mbuti	AHUR_2064	AR0508	SouthernNorthAmerica_EH	USA_Nevada_SpiritCave_11000BP.SG	blueviolet	22	Uspallata	LH-MF|LH-F	goldenrod1	21	366901	3596	102041	465193	373206	4502	82894	90823	392843	4207	93.38	2083453	393132	4434	88662	653247
Mbuti	AHUR_2064	Sumidouro7	SouthernNorthAmerica_EH	USA_Nevada_SpiritCave_11000BP.SG	blueviolet	22	Brazil_EH	Brazil_Sumidouro_10100BP.SG	palegreen1	22	358119	388	92287	208402	367583	581	63263	41454	385955	4598	83941	924419	388834	4896	79411	298641
Mbuti	AHUR_2064	SHN-575	SouthernNorthAmerica_EH	USA_Nevada_SpiritCave_11000BP.SG	blueviolet	22	CentralAndes_LateHorizon_LH	Peru_Sacsahuaman2_LH.Capt	darkorange2	13	36686	3585	102327	629060	368829	4363	84529	122001	NA	NA	NA	NA	NA	NA	NA	NA
Mbuti	AHUR_2064	MIS3	SouthernNorthAmerica_EH	USA_Nevada_SpiritCave_11000BP.SG	blueviolet	22	CentralAndes_MiddleHorizon_LH	Bolivia_MH_Miraflores.Capt	orange2	2	364943	3578	102007	589384	369881	4404	83.98	114335	NA	NA	NA	NA	NA	NA	NA	NA
Mbuti	AHUR_2064	MIS5	SouthernNorthAmerica_EH	USA_Nevada_SpiritCave_11000BP.SG	blueviolet	22	CentralAndes_MiddleHorizon_LH	Bolivia_MH_Miraflores.Capt	orange2	2	36706	364	100831	326592	366002	5078	72081	62811	NA	NA	NA	NA	NA	NA	NA	NA
Mbuti	AHUR_2064	I2263	SouthernNorthAmerica_EH	USA_Nevada_SpiritCave_11000BP.SG	blueviolet	22	CentralAndes_EarlyIntermediate_LH	Peru_ElBrujo_EIP_1300BP.Capt	darkorange1	1	371876	3806	97709	309458	370942	5262	70501	58677	NA	NA	NA	NA	NA	NA	NA	NA
Mbuti	AHUR_2064	I12366	SouthernNorthAmerica_EH	USA_Nevada_SpiritCave_11000BP.SG	blueviolet	22	SouthPatagonia_LH	Argentina_NorthTierradelFuego_Selknam_500BP.Capt	blue1	5	368323	3707	99368	393471	370347	4888	75771	75280	NA	NA	NA	NA	NA	NA	NA	NA
Mbuti	AHUR_2064	AR0509	SouthernNorthAmerica_EH	USA_Nevada_SpiritCave_11000BP.SG	blueviolet	22	Uspallata	LH-MF|LH-F	goldenrod1	21	368732	3467	106362	677481	375008	4358	86043	133384	39437	4237	93.07	3126805	396353	4446	89153	987907
Mbuti	AHUR_2064	AR0514	SouthernNorthAmerica_EH	USA_Nevada_SpiritCave_11000BP.SG	blueviolet	22	Uspallata	LH-MF|LH-F	goldenrod1	21	364375	3488	104472	467635	364715	4491	81207	92014	39277	4244	92545	2092062	393031	4436	88606	662400
Mbuti	AHUR_2064	I1357	SouthernNorthAmerica_EH	USA_Nevada_SpiritCave_11000BP.SG	blueviolet	22	CentralAndes_MiddleHorizon_LH	Peru_Laramate_900BP.Capt	orange2	8	369513	3688	100183	487762	370325	468	79.13	93682	NA	NA	NA	NA	NA	NA	NA	NA
Mbuti	AHUR_2064	I0308	SouthernNorthAmerica_EH	USA_Nevada_SpiritCave_11000BP.SG	blueviolet	22	Pampa_MH	Argentina_ArroyoSeco2_7700BP.Capt	lightblue	22	367771	3923	93742	309512	366674	5411	67766	59165	NA	NA	NA	NA	NA	NA	NA	NA
Mbuti	AHUR_2064	SN-20	SouthernNorthAmerica_EH	USA_Nevada_SpiritCave_11000BP.SG	blueviolet	22	California_SouthernChannelIslands_MH	USA_CA_SanNicolas_4800BP.SG	violet	23	365608	6041	60518	41100	NA	NA	NA	NA	399208	5017	79567	174689	405591	6527	62142	54779
Mbuti	AHUR_2064	AR0519	SouthernNorthAmerica_EH	USA_Nevada_SpiritCave_11000BP.SG	blueviolet	22	Uspallata	LH-MF|LH-F	goldenrod1	21	368322	3545	103909	779997	372306	4092	90987	154247	392876	436	90102	3650806	394221	4535	86921	1155806
Mbuti	AHUR_2064	I12359	SouthernNorthAmerica_EH	USA_Nevada_SpiritCave_11000BP.SG	blueviolet	22	SouthPatagonia_LH	Argentina_MitrePeninsula_Haush_400BP.Capt	blue1	3	367384	4047	90779	219377	370898	5696	65.11	41012	NA	NA	NA	NA	NA	NA	NA	NA
Mbuti	AHUR_2064	I2539	SouthernNorthAmerica_EH	USA_Nevada_SpiritCave_11000BP.SG	blueviolet	22	CentralAndes_MiddleHorizon_LH	Chile_CaletaHuelen_MH_1100BP.Capt	orange2	5	366948	5553	66084	45004	NA	NA	NA	NA	NA	NA	NA	NA	NA	NA	NA	NA
Mbuti	AHUR_2064	I2251	SouthernNorthAmerica_EH	USA_Nevada_SpiritCave_11000BP.SG	blueviolet	22	CentralAndes_LateIntermediate_LH	Peru_Highlands_LIP_Chimu.Capt	orange1	5	370414	3555	104181	483854	368708	4514	81689	91912	NA	NA	NA	NA	NA	NA	NA	NA
Mbuti	AHUR_2064	AR0528	SouthernNorthAmerica_EH	USA_Nevada_SpiritCave_11000BP.SG	blueviolet	22	Uspallata	LH-MF|LH-F	goldenrod1	21	365548	3502	104388	484160	367256	4574	80294	94946	392418	4139	94818	2179216	392956	4316	91056	682375
Mbuti	AHUR_2064	I8349	SouthernNorthAmerica_EH	USA_Nevada_SpiritCave_11000BP.SG	blueviolet	22	Pampa_MH	Argentina_LagunaChica_6800BP.Capt	lightblue	23	365371	3817	95731	265604	368612	565	65243	48451	NA	NA	NA	NA	NA	NA	NA	NA
Mbuti	AHUR_2064	2417Q	SouthernNorthAmerica_EH	USA_Nevada_SpiritCave_11000BP.SG	blueviolet	22	CentralAmerica_LH	Mexico_SierraGorda_Terminalclassic.SG	darkviolet	4	368957	3549	103956	854116	373828	4262	87712	169307	393957	4273	92189	4254383	394506	4399	89679	1341644
Mbuti	AHUR_2064	I0040	SouthernNorthAmerica_EH	USA_Nevada_SpiritCave_11000BP.SG	blueviolet	22	CentralAndes_MH	Peru_Lauricocha_5800BP.Capt	orange4	24	366352	3652	100303	464814	367162	4674	78561	90221	NA	NA	NA	NA	NA	NA	NA	NA
Mbuti	AHUR_2064	I0976	SouthernNorthAmerica_EH	USA_Nevada_SpiritCave_11000BP.SG	blueviolet	22	CentralAndes_MiddleHorizon_LH	Bolivia_MH_Tiwanaku.Capt	orange2	3	365174	4516	80858	103335	NA	NA	NA	NA	NA	NA	NA	NA	NA	NA	NA	NA
Mbuti	AHUR_2064	PS-02	SouthernNorthAmerica_EH	USA_Nevada_SpiritCave_11000BP.SG	blueviolet	22	California_SouthernMainland_LH	USA_CA_PointSal_1500BP.SG	palevioletred3	2	NA	NA	NA	NA	NA	NA	NA	NA	39002	4982	78282	127778	NA	NA	NA	NA
Mbuti	AHUR_2064	I12360	SouthernNorthAmerica_EH	USA_Nevada_SpiritCave_11000BP.SG	blueviolet	22	SouthPatagonia_LH	Argentina_MitrePeninsula_Haush_400BP.Capt	blue1	3	37091	475	78083	76757	NA	NA	NA	NA	NA	NA	NA	NA	NA	NA	NA	NA
Mbuti	AHUR_2064	I0977	SouthernNorthAmerica_EH	USA_Nevada_SpiritCave_11000BP.SG	blueviolet	22	CentralAndes_MiddleHorizon_LH	Bolivia_MH_Tiwanaku.Capt	orange2	3	364318	5778	63058	40081	NA	NA	NA	NA	NA	NA	NA	NA	NA	NA	NA	NA
Mbuti	AHUR_2064	I15173	SouthernNorthAmerica_EH	USA_Nevada_SpiritCave_11000BP.SG	blueviolet	22	California_Central_LH	USA_CA_CalaverasCounty_600BP.Capt	palevioletred1	7	375956	3705	101468	499505	378346	4647	81419	95995	NA	NA	NA	NA	NA	NA	NA	NA
Mbuti	AHUR_2064	I8351	SouthernNorthAmerica_EH	USA_Nevada_SpiritCave_11000BP.SG	blueviolet	22	Pampa_LH	Argentina_LagunaChica_1600BP.Capt	lightblue	1	367511	3441	106812	445035	366816	4763	77017	83198	NA	NA	NA	NA	NA	NA	NA	NA
Mbuti	AHUR_2064	KCA-3089	SouthernNorthAmerica_EH	USA_Nevada_SpiritCave_11000BP.SG	blueviolet	22	CentralAndes_LateHorizon_LH	Peru_Kusicancha2_LH.Capt	darkorange2	9	368685	3504	105.23	564039	372269	4348	85613	109071	NA	NA	NA	NA	NA	NA	NA	NA
Mbuti	AHUR_2064	I2710	SouthernNorthAmerica_EH	USA_Nevada_SpiritCave_11000BP.SG	blueviolet	22	California_NorthernChannelIslands_MH	USA_CA_SantaRosa_7400BP.Capt	violet	21	371237	4064	91353	199851	NA	NA	NA	NA	NA	NA	NA	NA	NA	NA	NA	NA
Mbuti	AHUR_2064	I2250	SouthernNorthAmerica_EH	USA_Nevada_SpiritCave_11000BP.SG	blueviolet	22	CentralAndes_LateIntermediate_LH	Peru_Highlands_LIP_Chimu.Capt	orange1	5	365522	3788	96499	193612	NA	NA	NA	NA	NA	NA	NA	NA	NA	NA	NA	NA
Mbuti	AHUR_2064	SHN-902	SouthernNorthAmerica_EH	USA_Nevada_SpiritCave_11000BP.SG	blueviolet	22	CentralAndes_LateHorizon_LH	Peru_Sacsahuaman2_LH.Capt	darkorange2	13	364793	3928	92874	225746	374196	5874	63704	43148	NA	NA	NA	NA	NA	NA	NA	NA
Mbuti	AHUR_2064	I0309	SouthernNorthAmerica_EH	USA_Nevada_SpiritCave_11000BP.SG	blueviolet	22	Pampa_MH	Argentina_ArroyoSeco2_7700BP.Capt	lightblue	22	36717	3813	96306	388909	366864	5183	70784	74501	NA	NA	NA	NA	NA	NA	NA	NA
Mbuti	AHUR_2064	I1742	SouthernNorthAmerica_EH	USA_Nevada_SpiritCave_11000BP.SG	blueviolet	22	CentralAndes_MiddleHorizon_LH	Peru_Laramate_900BP.Capt	orange2	8	370243	3723	99443	326505	37017	5084	72816	61701	NA	NA	NA	NA	NA	NA	NA	NA
Mbuti	AHUR_2064	I11289	SouthernNorthAmerica_EH	USA_Nevada_SpiritCave_11000BP.SG	blueviolet	22	California_SouthernMainland_MH	USA_CA_Goleta_4700BP.Capt	palevioletred3	21	375936	4099	91705	185968	NA	NA	NA	NA	NA	NA	NA	NA	NA	NA	NA	NA
Mbuti	AHUR_2064	TOY-4-5	SouthernNorthAmerica_EH	USA_Nevada_SpiritCave_11000BP.SG	blueviolet	22	CentralAndes_LateIntermediate_LH	Peru_Torontoy_500BP.Capt	orange1	12	367731	3669	100228	433853	370376	4853	76315	83901	NA	NA	NA	NA	NA	NA	NA	NA
Mbuti	AHUR_2064	I0044	SouthernNorthAmerica_EH	USA_Nevada_SpiritCave_11000BP.SG	blueviolet	22	CentralAndes_LateIntermediate_LH	Peru_Lima_LIP_650BP.Capt	orange1	6	369473	3506	105389	706966	370183	4335	85398	137760	NA	NA	NA	NA	NA	NA	NA	NA
Mbuti	AHUR_2064	SN-44	SouthernNorthAmerica_EH	USA_Nevada_SpiritCave_11000BP.SG	blueviolet	22	California_SouthernChannelIslands_MH	USA_CA_SanNicolas_4800BP.SG	violet	23	365471	3732	97925	828164	369291	4428	83396	163948	391424	4469	87595	3816890	393323	4674	84155	1216081
Mbuti	AHUR_2064	I15174	SouthernNorthAmerica_EH	USA_Nevada_SpiritCave_11000BP.SG	blueviolet	22	California_Central_LH	USA_CA_CalaverasCounty_600BP.Capt	palevioletred1	7	374001	364	102743	484884	373957	4653	80374	93115	NA	NA	NA	NA	NA	NA	NA	NA
Mbuti	AHUR_2064	I2261	SouthernNorthAmerica_EH	USA_Nevada_SpiritCave_11000BP.SG	blueviolet	22	CentralAndes_MH	Peru_LaGalgada_4100BP.Capt	orange4	22	371295	3591	103406	685707	368467	4372	84285	133139	NA	NA	NA	NA	NA	NA	NA	NA
Mbuti	AHUR_2064	I1864	SouthernNorthAmerica_EH	USA_Nevada_SpiritCave_11000BP.SG	blueviolet	22	SouthernNorthAmerica_LH	Mexico_CoyoteCave_950BP.Capt	blueviolet	7	360554	356	101292	339960	363443	5097	71304	63897	NA	NA	NA	NA	NA	NA	NA	NA
Mbuti	AHUR_2064	I0039	SouthernNorthAmerica_EH	USA_Nevada_SpiritCave_11000BP.SG	blueviolet	22	CentralAndes_MH	Peru_Lauricocha_3500BP.Capt	orange4	23	361953	3718	97.34	434960	357747	4925	72641	83814	NA	NA	NA	NA	NA	NA	NA	NA
Mbuti	AHUR_2064	I17497	SouthernNorthAmerica_EH	USA_Nevada_SpiritCave_11000BP.SG	blueviolet	22	CentralAndes_LateIntermediate_LH	Chile_LIP_Pukara_600BP.Capt	orange1	1	368578	4396	83842	123689	NA	NA	NA	NA	NA	NA	NA	NA	NA	NA	NA	NA
Mbuti	AHUR_2064	I12362	SouthernNorthAmerica_EH	USA_Nevada_SpiritCave_11000BP.SG	blueviolet	22	SouthPatagonia_MH	Argentina_NorthTierradelFuego_LaArcillosa2_5800BP.Capt	blue3	21	367299	3584	102491	550142	367009	4433	82781	104634	NA	NA	NA	NA	NA	NA	NA	NA
Mbuti	AHUR_2064	AR0162	SouthernNorthAmerica_EH	USA_Nevada_SpiritCave_11000BP.SG	blueviolet	22	Uspallata	LH-LF|LH-F	darkorange4	21	366408	3647	100473	568042	371979	4544	81866	112146	394048	4351	90573	2535022	394266	4538	86888	803205
Mbuti	AHUR_2064	F9	SouthernNorthAmerica_EH	USA_Nevada_SpiritCave_11000BP.SG	blueviolet	22	SouthernNorthAmerica_LH	Mexico_SierraTarahumara_PostClassic.SG	blueviolet	3	359923	3518	102301	543465	360361	4484	80364	106767	384698	4169	92278	2673912	385535	4334	88957	834558
Mbuti	AHUR_2064	SHN-492	SouthernNorthAmerica_EH	USA_Nevada_SpiritCave_11000BP.SG	blueviolet	22	CentralAndes_LateHorizon_LH	Peru_Sacsahuaman3_LH.Capt	darkorange2	14	369485	3602	102576	447019	375244	4563	82236	85900	NA	NA	NA	NA	NA	NA	NA	NA
Mbuti	AHUR_2064	AHUR770c	SouthernNorthAmerica_EH	USA_Nevada_SpiritCave_11000BP.SG	blueviolet	22	SouthernNorthAmerica_EH	USA_Nevada_SpiritCave_11000BP.SG	blueviolet	22	384582	4892	78612	97981	NA	NA	NA	NA	418624	509	82241	434040	425545	5558	76566	139894
Mbuti	AHUR_2064	MX-01	SouthernNorthAmerica_EH	USA_Nevada_SpiritCave_11000BP.SG	blueviolet	22	California_Baja_LH	Mexico_Baja_IronSprings_Unknown.SG	palevioletred1	2	363535	484	75106	71065	NA	NA	NA	NA	388284	4579	84793	313183	390084	5382	72473	100716
Mbuti	AHUR_2064	AR0180	SouthernNorthAmerica_EH	USA_Nevada_SpiritCave_11000BP.SG	blueviolet	22	Uspallata	LH-LF|LH-F	darkorange4	22	365058	4944	73832	81577	NA	NA	NA	NA	394646	4801	82207	397729	392249	5331	73582	127692
Mbuti	AHUR_2064	AR0512	SouthernNorthAmerica_EH	USA_Nevada_SpiritCave_11000BP.SG	blueviolet	22	Uspallata	LH-MF|LH-F	goldenrod1	21	37034	3478	106476	859338	373682	413	90.49	169979	398212	4422	90043	4063964	400279	4539	88177	1285665
Mbuti	AHUR_2064	I2711	SouthernNorthAmerica_EH	USA_Nevada_SpiritCave_11000BP.SG	blueviolet	22	California_NorthernChannelIslands_MH	USA_CA_SantaRosa_7400BP.Capt	violet	21	373315	386	96724	380658	376419	5185	72.6	71911	NA	NA	NA	NA	NA	NA	NA	NA
Mbuti	AHUR_2064	I12363	SouthernNorthAmerica_EH	USA_Nevada_SpiritCave_11000BP.SG	blueviolet	22	SouthPatagonia_LH	Argentina_NorthTierradelFuego_Selknam_500BP.Capt	blue1	5	369331	3662	100845	474193	371884	4702	79089	90572	NA	NA	NA	NA	NA	NA	NA	NA
Mbuti	AHUR_2064	SN-13	SouthernNorthAmerica_EH	USA_Nevada_SpiritCave_11000BP.SG	blueviolet	22	California_SouthernChannelIslands_LH	USA_CA_SanNicolas_1600BP.SG	violet	8	360053	3539	101734	389612	361883	4727	76565	76018	386059	413	93479	1684507	3892	4364	89.19	530130
Mbuti	AHUR_2064	I11551	SouthernNorthAmerica_EH	USA_Nevada_SpiritCave_11000BP.SG	blueviolet	22	California_Central_LH	USA_CA_Carmel_600BP.Capt	palevioletred1	6	377704	4225	89.39	176018	NA	NA	NA	NA	NA	NA	NA	NA	NA	NA	NA	NA
Mbuti	AHUR_2064	I0968	SouthernNorthAmerica_EH	USA_Nevada_SpiritCave_11000BP.SG	blueviolet	22	CentralAndes_MiddleHorizon_LH	Peru_LimaCoast_MH_1000BP.Capt	orange2	10	378274	5549	68167	47720	NA	NA	NA	NA	NA	NA	NA	NA	NA	NA	NA	NA
Mbuti	AHUR_2064	PS-18	SouthernNorthAmerica_EH	USA_Nevada_SpiritCave_11000BP.SG	blueviolet	22	California_SouthernMainland_LH	USA_CA_PointSal_1500BP.SG	palevioletred3	2	364219	5273	69077	63378	NA	NA	NA	NA	394716	4662	84667	287752	403043	5421	74.35	90327
Mbuti	AHUR_2064	CR-01	SouthernNorthAmerica_EH	USA_Nevada_SpiritCave_11000BP.SG	blueviolet	22	California_NorthernChannelIslands_LH	USA_CA_SantaCruz_1000BP.SG	violet	2	367535	353	104.12	821009	371621	4154	89465	162489	394643	4319	91364	3791442	395457	451	87678	1207442
Mbuti	AHUR_2064	I11260	SouthernNorthAmerica_EH	USA_Nevada_SpiritCave_11000BP.SG	blueviolet	22	California_Central_LH	USA_CA_Carmel_600BP.Capt	palevioletred1	6	372676	3593	103729	538417	374353	4565	81999	102276	NA	NA	NA	NA	NA	NA	NA	NA
Mbuti	AHUR_2064	I2252	SouthernNorthAmerica_EH	USA_Nevada_SpiritCave_11000BP.SG	blueviolet	22	CentralAndes_MiddleHorizon_LH	Peru_Highlands_Chinchawas_MH.Capt	orange2	7	372944	3757	99264	266883	375033	5595	67.03	50739	NA	NA	NA	NA	NA	NA	NA	NA
Mbuti	AHUR_2064	AR0517	SouthernNorthAmerica_EH	USA_Nevada_SpiritCave_11000BP.SG	blueviolet	22	Uspallata	LH-MFout|LH-F	goldenrod1	23	368439	3744	98406	269193	377028	5299	71146	52835	392082	4403	89055	1171378	393313	4699	83.7	371553
Mbuti	AHUR_2064	I0042	SouthernNorthAmerica_EH	USA_Nevada_SpiritCave_11000BP.SG	blueviolet	22	CentralAndes_LateIntermediate_LH	Peru_LIP_Botigiriayocc_600BP.Capt	orange1	7	362955	3471	104571	784321	362856	4229	85807	153546	NA	NA	NA	NA	NA	NA	NA	NA
Mbuti	AHUR_2064	KCA-1108	SouthernNorthAmerica_EH	USA_Nevada_SpiritCave_11000BP.SG	blueviolet	22	CentralAndes_LateHorizon_LH	Peru_Kusicancha1_LH.Capt	darkorange2	8	368091	3549	103731	577835	371904	4348	85532	111365	NA	NA	NA	NA	NA	NA	NA	NA
Mbuti	AHUR_2064	I7086	SouthernNorthAmerica_EH	USA_Nevada_SpiritCave_11000BP.SG	blueviolet	22	Pampa_MH	Argentina_ArroyoSeco2_7700BP.Capt	lightblue	22	364186	4843	75197	73246	NA	NA	NA	NA	NA	NA	NA	NA	NA	NA	NA	NA
Mbuti	AHUR_2064	AM74	SouthernNorthAmerica_EH	USA_Nevada_SpiritCave_11000BP.SG	blueviolet	22	SouthPatagonia_LH	Chile_StraitOfMagellan_Kaweskar_100BP.SG	blue1	8	362115	367	98662	275313	370997	5373	69052	52666	389254	4053	96047	1276957	391067	4343	90055	388029
Mbuti	AHUR_2064	CCA-5-1	SouthernNorthAmerica_EH	USA_Nevada_SpiritCave_11000BP.SG	blueviolet	22	CentralAndes_LateHorizon_LH	Peru_CasaConcha2_LH.Capt	darkorange2	4	368051	3477	105848	640153	367503	4321	85056	124575	NA	NA	NA	NA	NA	NA	NA	NA
Mbuti	AHUR_2064	Cuncaicha15-07	SouthernNorthAmerica_EH	USA_Nevada_SpiritCave_11000BP.SG	blueviolet	22	CentralAndes_EH	Peru_Cuncaicha_9000BP.Capt	darkorange4	21	367685	3769	97545	529800	370979	455	81534	101154	NA	NA	NA	NA	NA	NA	NA	NA
Mbuti	AHUR_2064	I1743	SouthernNorthAmerica_EH	USA_Nevada_SpiritCave_11000BP.SG	blueviolet	22	CentralAndes_LateHorizon_LH	Peru_SanSebastian_LH_500BP.Capt	darkorange2	2	368592	3737	98621	279822	376005	5214	72116	52547	NA	NA	NA	NA	NA	NA	NA	NA
Mbuti	AHUR_2064	I3443	SouthernNorthAmerica_EH	USA_Nevada_SpiritCave_11000BP.SG	blueviolet	22	CentralAmerica_EH	Belize_9400BP.Capt	mediumvioletred	21	371631	3943	94244	282859	367305	5391	68137	54270	NA	NA	NA	NA	NA	NA	NA	NA
Mbuti	AHUR_2064	I5456	SouthernNorthAmerica_EH	USA_Nevada_SpiritCave_11000BP.SG	blueviolet	22	CentralAmerica_MH	Belize_7400BP.Capt	mediumvioletred	24	369458	3937	93848	311403	369063	5376	68644	59042	NA	NA	NA	NA	NA	NA	NA	NA
Mbuti	AHUR_2064	PS-06	SouthernNorthAmerica_EH	USA_Nevada_SpiritCave_11000BP.SG	blueviolet	22	California_SouthernMainland_LH	USA_CA_PointSal_1500BP.SG	palevioletred3	2	365862	3468	105488	578825	370049	4419	83732	113641	393134	4085	96244	2502402	394354	4271	92335	790580
Mbuti	AHUR_2064	I1479	SouthernNorthAmerica_EH	USA_Nevada_SpiritCave_11000BP.SG	blueviolet	22	CentralAndes_LateIntermediate_LH	Peru_Palpa_LIP_550BP.Capt	orange1	10	367624	3664	100.33	393556	367831	4857	75733	74804	NA	NA	NA	NA	NA	NA	NA	NA
Mbuti	AHUR_2064	AR0520	SouthernNorthAmerica_EH	USA_Nevada_SpiritCave_11000BP.SG	blueviolet	22	Uspallata	LH-LFplc|LH-F	darkorange	22	364658	4044	90168	212118	373947	585	63923	42078	388521	4352	89272	976617	390025	472	82628	311344
Mbuti	AHUR_2064	SN-39	SouthernNorthAmerica_EH	USA_Nevada_SpiritCave_11000BP.SG	blueviolet	22	California_SouthernChannelIslands_MH	USA_CA_SanNicolas_4800BP.SG	violet	23	363178	4202	86431	152403	NA	NA	NA	NA	39369	4719	83422	646639	394677	5229	75477	205214
Mbuti	AHUR_2064	SN-11	SouthernNorthAmerica_EH	USA_Nevada_SpiritCave_11000BP.SG	blueviolet	22	California_SouthernChannelIslands_LH	USA_CA_SanNicolas_1600BP.SG	violet	8	360694	3457	104331	730713	36673	4218	86943	144559	387161	4194	92304	3331294	389764	4284	90979	1065133
Mbuti	AHUR_2064	Lapa22	SouthernNorthAmerica_EH	USA_Nevada_SpiritCave_11000BP.SG	blueviolet	22	Brazil_EH	Brazil_LapaDoSanto_9600BP.Capt	palegreen1	21	365857	3832	95469	313911	375759	5323	70591	59031	NA	NA	NA	NA	NA	NA	NA	NA
Mbuti	AHUR_2064	I2545	SouthernNorthAmerica_EH	USA_Nevada_SpiritCave_11000BP.SG	blueviolet	22	CentralAndes_LateHorizon_LH	Peru_LH_Inca.Capt	darkorange2	1	371574	4335	85707	132987	NA	NA	NA	NA	NA	NA	NA	NA	NA	NA	NA	NA
Mbuti	AHUR_2064	I0041	SouthernNorthAmerica_EH	USA_Nevada_SpiritCave_11000BP.SG	blueviolet	22	CentralAndes_EH	Peru_Lauricocha_8600BP.Capt	darkorange4	22	367167	3933	93349	402139	369446	4998	73912	77703	NA	NA	NA	NA	NA	NA	NA	NA
Mbuti	AHUR_2064	Cuncaicha15-03	SouthernNorthAmerica_EH	USA_Nevada_SpiritCave_11000BP.SG	blueviolet	22	CentralAndes_MH	Peru_Cuncaicha_4200BP.Capt	orange4	21	36769	3605	101982	518378	372039	459	81047	98573	NA	NA	NA	NA	NA	NA	NA	NA
Mbuti	AHUR_2064	AR0152	SouthernNorthAmerica_EH	USA_Nevada_SpiritCave_11000BP.SG	blueviolet	22	Uspallata	LH-HG|LH-HG	darkorange4	23	366583	4567	80276	110163	NA	NA	NA	NA	392441	4595	85405	547167	393124	5125	76.71	176003
Mbuti	AHUR_2064	I12361	SouthernNorthAmerica_EH	USA_Nevada_SpiritCave_11000BP.SG	blueviolet	22	SouthPatagonia_LH	Argentina_MitrePeninsula_Haush_400BP.Capt	blue1	3	36459	4691	77.72	90048	NA	NA	NA	NA	NA	NA	NA	NA	NA	NA	NA	NA
Mbuti	AHUR_2064	AR0500and513	SouthernNorthAmerica_EH	USA_Nevada_SpiritCave_11000BP.SG	blueviolet	22	Uspallata	LH-MF|LH-F	goldenrod1	21	367639	3652	100673	396144	369753	4883	75724	77894	393641	4344	90608	1799008	394904	4536	87065	566645
Mbuti	AHUR_2064	I0969	SouthernNorthAmerica_EH	USA_Nevada_SpiritCave_11000BP.SG	blueviolet	22	CentralAndes_LateIntermediate_LH	Peru_Lima_LIP_650BP.Capt	orange1	6	361368	5692	63486	43961	NA	NA	NA	NA	NA	NA	NA	NA	NA	NA	NA	NA
Mbuti	AHUR_2064	I12943	SouthernNorthAmerica_EH	USA_Nevada_SpiritCave_11000BP.SG	blueviolet	22	SouthPatagonia_LH	Argentina_BeagleChannel_Yamana_100BP.Capt	blue1	1	366004	3632	100778	619016	372389	432	86.2	119102	NA	NA	NA	NA	NA	NA	NA	NA
Mbuti	AHUR_2064	OTT-1160	SouthernNorthAmerica_EH	USA_Nevada_SpiritCave_11000BP.SG	blueviolet	22	CentralAndes_LateIntermediate_LH	Peru_Ollantaytambo_LIP.Capt	orange1	13	368957	3605	102348	586342	370592	439	84424	113431	NA	NA	NA	NA	NA	NA	NA	NA
Mbuti	AHUR_2064	I12376	SouthernNorthAmerica_EH	USA_Nevada_SpiritCave_11000BP.SG	blueviolet	22	Pampa_LH	Argentina_LagunaToro_2400BP.Capt	lightblue	2	365657	4251	86025	126031	NA	NA	NA	NA	NA	NA	NA	NA	NA	NA	NA	NA
Mbuti	AHUR_2064	TOY-7A-1	SouthernNorthAmerica_EH	USA_Nevada_SpiritCave_11000BP.SG	blueviolet	22	CentralAndes_LateIntermediate_LH	Peru_Torontoy_500BP.Capt	orange1	12	37088	3587	103386	586497	3745	4541	82.47	114317	NA	NA	NA	NA	NA	NA	NA	NA
Mbuti	AHUR_2064	I0750	SouthernNorthAmerica_EH	USA_Nevada_SpiritCave_11000BP.SG	blueviolet	22	California_SouthernChannelIslands_LH	USA_CA_SanClemente_500BP.Capt	violet	9	362455	3566	101632	479788	36748	4545	80856	93160	NA	NA	NA	NA	NA	NA	NA	NA
Mbuti	AHUR_2064	SN-52	SouthernNorthAmerica_EH	USA_Nevada_SpiritCave_11000BP.SG	blueviolet	22	California_SouthernChannelIslands_LH	USA_CA_SanNicolas_1600BP.SG	violet	8	366297	4247	86242	148293	NA	NA	NA	NA	394684	4264	92567	618526	393356	4675	84135	192378
Mbuti	AHUR_2064	I15175	SouthernNorthAmerica_EH	USA_Nevada_SpiritCave_11000BP.SG	blueviolet	22	California_Central_LH	USA_CA_CalaverasCounty_600BP.Capt	palevioletred1	7	366969	3647	100624	556194	36635	46	79636	106832	NA	NA	NA	NA	NA	NA	NA	NA
Mbuti	AHUR_2064	I15170	SouthernNorthAmerica_EH	USA_Nevada_SpiritCave_11000BP.SG	blueviolet	22	California_Central_LH	USA_CA_CalaverasCounty_1500BP.Capt	palevioletred1	8	369183	3613	102182	535806	368658	4377	84.22	102950	NA	NA	NA	NA	NA	NA	NA	NA
Mbuti	AHUR_2064	SN-38	SouthernNorthAmerica_EH	USA_Nevada_SpiritCave_11000BP.SG	blueviolet	22	California_SouthernChannelIslands_LH	USA_CA_SanNicolas_1600BP.SG	violet	8	366018	5201	70375	62876	NA	NA	NA	NA	395915	4724	83809	270825	40649	5483	74132	86114
Mbuti	AHUR_2064	Sumidouro5	SouthernNorthAmerica_EH	USA_Nevada_SpiritCave_11000BP.SG	blueviolet	22	Brazil_EH	Brazil_Sumidouro_10400BP.SG	palegreen1	22	363685	3639	99943	877594	37541	4321	86876	173934	39032	4412	88473	4203705	393399	4539	86663	1337160
Mbuti	AHUR_2064	I11557	SouthernNorthAmerica_EH	USA_Nevada_SpiritCave_11000BP.SG	blueviolet	22	California_NorthernChannelIslands_MH	USA_CA_SantaRosa_7400BP.Capt	violet	21	368192	3672	100284	627015	3694	4463	82764	121328	NA	NA	NA	NA	NA	NA	NA	NA
Mbuti	AHUR_2064	SC-04	SouthernNorthAmerica_EH	USA_Nevada_SpiritCave_11000BP.SG	blueviolet	22	California_SouthernChannelIslands_LH	USA_CA_SanClemente_900BP.SG	violet	7	365387	4319	84607	151052	NA	NA	NA	NA	392536	4671	84045	666830	396962	5071	78287	214370
Mbuti	AHUR_2064	PS-03	SouthernNorthAmerica_EH	USA_Nevada_SpiritCave_11000BP.SG	blueviolet	22	California_SouthernMainland_LH	USA_CA_PointSal_1500BP.SG	palevioletred3	2	369156	4913	75137	78616	NA	NA	NA	NA	39731	4701	84518	338384	39745	5506	72186	107765
Mbuti	AHUR_2064	I11296	SouthernNorthAmerica_EH	USA_Nevada_SpiritCave_11000BP.SG	blueviolet	22	California_SouthernMainland_LH	USA_CA_Goleta_2600BP.Capt	palevioletred3	7	370944	3464	107085	566073	366266	4263	85923	108337	NA	NA	NA	NA	NA	NA	NA	NA
Mbuti	AHUR_2064	I1356	SouthernNorthAmerica_EH	USA_Nevada_SpiritCave_11000BP.SG	blueviolet	22	CentralAndes_LateIntermediate_LH	Peru_LIP_Pacapaccari_600BP.Capt	orange1	8	370155	363	101983	452972	370537	4609	80.39	85667	NA	NA	NA	NA	NA	NA	NA	NA
Mbuti	AHUR_2064	AM71	SouthernNorthAmerica_EH	USA_Nevada_SpiritCave_11000BP.SG	blueviolet	22	SouthPatagonia_LH	Chile_StraitOfMagellan_Kaweskar_100BP.SG	blue1	8	368377	5216	70631	65672	NA	NA	NA	NA	395483	4686	84402	327290	400275	5332	75071	96352
Mbuti	AHUR_2064	PS-17	SouthernNorthAmerica_EH	USA_Nevada_SpiritCave_11000BP.SG	blueviolet	22	California_SouthernMainland_LH	USA_CA_PointSal_1500BP.SG	palevioletred3	2	NA	NA	NA	NA	NA	NA	NA	NA	384148	5061	75906	151983	384431	6235	61656	48691
Mbuti	AHUR_2064	I12356	SouthernNorthAmerica_EH	USA_Nevada_SpiritCave_11000BP.SG	blueviolet	22	SouthPatagonia_LH	Argentina_MitrePeninsula_Haush_400BP.Capt	blue1	3	36764	3608	101889	440218	367614	4614	79.68	83075	NA	NA	NA	NA	NA	NA	NA	NA
Mbuti	AHUR_2064	I2558	SouthernNorthAmerica_EH	USA_Nevada_SpiritCave_11000BP.SG	blueviolet	22	CentralAndes_EarlyIntermediate_LH	Peru_Ullujaya_EIP_1350BP.Capt	darkorange1	5	370973	3925	94507	210633	374941	6129	61172	39396	NA	NA	NA	NA	NA	NA	NA	NA
Mbuti	AHUR_2064	AR0149	SouthernNorthAmerica_EH	USA_Nevada_SpiritCave_11000BP.SG	blueviolet	22	Uspallata	LH-HG|LH-HG	darkorange4	23	373705	4217	88622	169918	NA	NA	NA	NA	393686	4473	88009	843075	392985	4758	82588	268646
Mbuti	AHUR_2064	I3564	SouthernNorthAmerica_EH	USA_Nevada_SpiritCave_11000BP.SG	blueviolet	22	California_NorthernChannelIslands_LH	USA_CA_SantaRosa_3000BP.Capt	violet	3	372029	3613	102961	584919	372211	4438	83869	111526	NA	NA	NA	NA	NA	NA	NA	NA
Mbuti	AHUR_2064	Sumidouro4	SouthernNorthAmerica_EH	USA_Nevada_SpiritCave_11000BP.SG	blueviolet	22	Brazil_EH	Brazil_Sumidouro_10100BP.SG	palegreen1	22	354607	372	95332	328165	361571	5075	71241	64642	381638	4517	84.48	1434755	386655	4816	80289	461306
Mbuti	AHUR_2064	TOY-1-1	SouthernNorthAmerica_EH	USA_Nevada_SpiritCave_11000BP.SG	blueviolet	22	CentralAndes_LateIntermediate_LH	Peru_Torontoy_500BP.Capt	orange1	12	367358	3679	99863	535634	369448	4561	81007	103942	NA	NA	NA	NA	NA	NA	NA	NA
Mbuti	AHUR_2064	I2538	SouthernNorthAmerica_EH	USA_Nevada_SpiritCave_11000BP.SG	blueviolet	22	CentralAndes_MiddleHorizon_LH	Chile_CaletaHuelen_MH_1100BP.Capt	orange2	5	363816	4368	83282	106459	NA	NA	NA	NA	NA	NA	NA	NA	NA	NA	NA	NA
Mbuti	AHUR_2064	I1744	SouthernNorthAmerica_EH	USA_Nevada_SpiritCave_11000BP.SG	blueviolet	22	CentralAndes_LateIntermediate_LH	Peru_SanSebastian_LIP_600BP.Capt	orange1	11	36848	3479	105.92	512082	369234	4546	81.23	97370	NA	NA	NA	NA	NA	NA	NA	NA
Mbuti	AHUR_2064	I17109	SouthernNorthAmerica_EH	USA_Nevada_SpiritCave_11000BP.SG	blueviolet	22	SouthernNorthAmerica_LH	Mexico_Tayopa_1000BP.Capt	blueviolet	5	358093	476	75232	76606	NA	NA	NA	NA	NA	NA	NA	NA	NA	NA	NA	NA
Mbuti	AHUR_2064	AR0518	SouthernNorthAmerica_EH	USA_Nevada_SpiritCave_11000BP.SG	blueviolet	22	Uspallata	LH-MF|LH-F	goldenrod1	21	368411	3636	101316	786848	36983	4255	86926	155660	39202	4507	86.98	3718486	392953	462	85064	1177190
Mbuti	AHUR_2064	SJArg-3	SouthernNorthAmerica_EH	USA_Nevada_SpiritCave_11000BP.SG	blueviolet	22	Cuyo_LH	Argentina_Callingasta_1500BP.SG	brown3	1	367203	5612	65428	45743	NA	NA	NA	NA	396611	4934	80389	196734	398925	5952	67024	61849
Mbuti	AHUR_2064	I7090	SouthernNorthAmerica_EH	USA_Nevada_SpiritCave_11000BP.SG	blueviolet	22	Pampa_MH	Argentina_ArroyoSeco2_7200BP.Capt	lightblue	21	365089	4329	84339	143555	NA	NA	NA	NA	NA	NA	NA	NA	NA	NA	NA	NA
Mbuti	AHUR_2064	I2549	SouthernNorthAmerica_EH	USA_Nevada_SpiritCave_11000BP.SG	blueviolet	22	CentralAndes_LateIntermediate_LH	Peru_Palpa_LIP_550BP.Capt	orange1	10	365591	3734	97.9	275833	363595	541	67211	51937	NA	NA	NA	NA	NA	NA	NA	NA
Mbuti	AHUR_2064	I21452	SouthernNorthAmerica_EH	USA_Nevada_SpiritCave_11000BP.SG	blueviolet	22	California_SouthernMainland_LH	USA_CA_Goleta_900BP.Capt	palevioletred3	5	37241	3685	101048	377029	378057	4796	78834	71997	NA	NA	NA	NA	NA	NA	NA	NA
Mbuti	AHUR_2064	QKI-9-3	SouthernNorthAmerica_EH	USA_Nevada_SpiritCave_11000BP.SG	blueviolet	22	CentralAndes_LateHorizon_LH	Peru_Qotakalli1_LH.Capt	darkorange2	10	371347	3754	98.92	415516	367588	51	72082	79511	NA	NA	NA	NA	NA	NA	NA	NA
Mbuti	AHUR_2064	I8575	SouthernNorthAmerica_EH	USA_Nevada_SpiritCave_11000BP.SG	blueviolet	22	SouthPatagonia_LH	Chile_SouthernContinent_Aonikenk_400BP.Capt	blue1	7	369767	3674	100646	363940	375257	4979	75367	69933	NA	NA	NA	NA	NA	NA	NA	NA
Mbuti	AHUR_2064	Cuncaicha15-04	SouthernNorthAmerica_EH	USA_Nevada_SpiritCave_11000BP.SG	blueviolet	22	CentralAndes_MH	Peru_Cuncaicha_3300BP_contam.Capt	orange4	25	365018	3609	101134	594433	366746	4465	82.13	114408	NA	NA	NA	NA	NA	NA	NA	NA
Mbuti	AHUR_2064	I11295	SouthernNorthAmerica_EH	USA_Nevada_SpiritCave_11000BP.SG	blueviolet	22	California_SouthernMainland_LH	USA_CA_Goleta_400BP.Capt	palevioletred3	6	368499	3638	101279	561272	367727	4637	79303	107356	NA	NA	NA	NA	NA	NA	NA	NA
Mbuti	AHUR_2064	SM-01	SouthernNorthAmerica_EH	USA_Nevada_SpiritCave_11000BP.SG	blueviolet	22	California_NorthernChannelIslands_LH	USA_CA_SanMiguel_650BP.SG	violet	1	367689	4832	76099	78441	NA	NA	NA	NA	395132	4854	81412	333006	396984	5572	71242	104392
Mbuti	AHUR_2064	I12367	SouthernNorthAmerica_EH	USA_Nevada_SpiritCave_11000BP.SG	blueviolet	22	SouthPatagonia_LH	Argentina_NorthTierradelFuego_Selknam_500BP.Capt	blue1	5	367865	3751	98069	259912	370561	5667	65393	49482	NA	NA	NA	NA	NA	NA	NA	NA
Mbuti	AHUR_2064	I2560	SouthernNorthAmerica_EH	USA_Nevada_SpiritCave_11000BP.SG	blueviolet	22	CentralAndes_MiddleHorizon_LH	Peru_Ullujaya_MH_950BP.Capt	orange2	9	367433	3602	102003	399988	365704	4831	75705	75790	NA	NA	NA	NA	NA	NA	NA	NA
Mbuti	AHUR_2064	I2242	SouthernNorthAmerica_EH	USA_Nevada_SpiritCave_11000BP.SG	blueviolet	22	CentralAndes_MiddleHorizonLateIntermeditae_LH	Peru_MH_LIP_ElBrujo_850BP.Capt	darkorange3	1	371333	3769	98533	258674	370007	5401	68504	49707	NA	NA	NA	NA	NA	NA	NA	NA
Mbuti	AHUR_2064	Sumidouro6	SouthernNorthAmerica_EH	USA_Nevada_SpiritCave_11000BP.SG	blueviolet	22	Brazil_EH	Brazil_Sumidouro_10100BP.SG	palegreen1	22	360799	3692	97736	571373	365188	4505	81064	112586	385994	4442	86892	2439560	389501	4624	84234	780955
Mbuti	AHUR_2064	I2706	SouthernNorthAmerica_EH	USA_Nevada_SpiritCave_11000BP.SG	blueviolet	22	California_NorthernChannelIslands_LH	USA_CA_SantaRosa_300BP.Capt	violet	4	368322	398	92546	212387	368299	6076	60618	39629	NA	NA	NA	NA	NA	NA	NA	NA
Mbuti	AHUR_2064	QKI-4	SouthernNorthAmerica_EH	USA_Nevada_SpiritCave_11000BP.SG	blueviolet	22	CentralAndes_LateHorizon_LH	Peru_Qotakalli2_LH.Capt	darkorange2	11	366316	3555	103037	542746	365416	4551	80285	105244	NA	NA	NA	NA	NA	NA	NA	NA
Mbuti	AHUR_2064	B-03	SouthernNorthAmerica_EH	USA_Nevada_SpiritCave_11000BP.SG	blueviolet	22	California_Baja_LH	Mexico_Pericues_Unknown.SG	palevioletred1	4	36085	3982	90.61	199255	363934	5713	63706	39175	386528	4398	87.89	872539	389571	4778	81528	276248
Mbuti	AHUR_2064	I5457	SouthernNorthAmerica_EH	USA_Nevada_SpiritCave_11000BP.SG	blueviolet	22	CentralAmerica_MH	Belize_7400BP.Capt	mediumvioletred	24	363235	4087	88867	185098	NA	NA	NA	NA	NA	NA	NA	NA	NA	NA	NA	NA
Mbuti	AHUR_2064	Yaghan895	SouthernNorthAmerica_EH	USA_Nevada_SpiritCave_11000BP.SG	blueviolet	22	SouthPatagonia_LH	Argentina_BeagleChannel_Yamana_100BP.SG	blue1	1	365164	3823	95519	423037	364506	4985	73121	80020	396812	4245	93488	1968741	398787	4478	89052	587819
Mbuti	AHUR_2064	MIS6	SouthernNorthAmerica_EH	USA_Nevada_SpiritCave_11000BP.SG	blueviolet	22	CentralAndes_MiddleHorizon_LH	Bolivia_MiraFlores_MH.Capt	orange2	4	356683	4601	77517	73463	NA	NA	NA	NA	NA	NA	NA	NA	NA	NA	NA	NA
Mbuti	AHUR_2064	I2241	SouthernNorthAmerica_EH	USA_Nevada_SpiritCave_11000BP.SG	blueviolet	22	CentralAndes_MiddleHorizonLateIntermeditae_LH	Peru_MH_LIP_Lambayeque.Capt	darkorange3	2	369615	3579	103265	575922	371349	4598	80772	111314	NA	NA	NA	NA	NA	NA	NA	NA
Mbuti	AHUR_2064	Lovelock4	SouthernNorthAmerica_EH	USA_Nevada_SpiritCave_11000BP.SG	blueviolet	22	SouthernNorthAmerica_LH	USA_Nevada_LovelockCave_1850BP.SG	blueviolet	1	3664	3764	97.35	345216	366893	4979	73686	67947	391432	4257	91941	1577462	391647	434	90242	498380
Mbuti	AHUR770c	SC-03	SouthernNorthAmerica_EH	USA_Nevada_SpiritCave_11000BP.SG	blueviolet	22	California_SouthernChannelIslands_LH	USA_CA_SanClemente_900BP.SG	violet	7	359043	6127	58602	36548	NA	NA	NA	NA	396029	5105	77.57	146092	403632	664	60.79	45714
Mbuti	AHUR770c	I1484	SouthernNorthAmerica_EH	USA_Nevada_SpiritCave_11000BP.SG	blueviolet	22	CentralAndes_MiddleHorizon_LH	Peru_Laramate_900BP.Capt	orange2	8	364005	5172	70377	55845	NA	NA	NA	NA	NA	NA	NA	NA	NA	NA	NA	NA
Mbuti	AHUR770c	I14825	SouthernNorthAmerica_EH	USA_Nevada_SpiritCave_11000BP.SG	blueviolet	22	California_SouthernMainland_LH	USA_CA_Malibu_3400BP.Capt	palevioletred3	3	366662	6724	54531	26847	NA	NA	NA	NA	NA	NA	NA	NA	NA	NA	NA	NA
Mbuti	AHUR770c	I1356	SouthernNorthAmerica_EH	USA_Nevada_SpiritCave_11000BP.SG	blueviolet	22	CentralAndes_LateIntermediate_LH	Peru_LIP_Pacapaccari_600BP.Capt	orange1	8	369382	5509	67055	50590	NA	NA	NA	NA	NA	NA	NA	NA	NA	NA	NA	NA
Mbuti	AHUR770c	OTT-1187	SouthernNorthAmerica_EH	USA_Nevada_SpiritCave_11000BP.SG	blueviolet	22	CentralAndes_LateIntermediate_LH	Peru_Ollantaytambo_LIP.Capt	orange1	13	368907	4895	75.37	69956	NA	NA	NA	NA	NA	NA	NA	NA	NA	NA	NA	NA
Mbuti	AHUR770c	I2230	SouthernNorthAmerica_EH	USA_Nevada_SpiritCave_11000BP.SG	blueviolet	22	Pampa_MH	Argentina_ArroyoSeco2_7700BP.Capt	lightblue	22	367041	5035	72891	65935	NA	NA	NA	NA	NA	NA	NA	NA	NA	NA	NA	NA
Mbuti	AHUR770c	I0751	SouthernNorthAmerica_EH	USA_Nevada_SpiritCave_11000BP.SG	blueviolet	22	California_SouthernChannelIslands_LH	USA_CA_SanClemente_500BP.Capt	violet	9	362842	475	76383	75211	NA	NA	NA	NA	NA	NA	NA	NA	NA	NA	NA	NA
Mbuti	AHUR770c	I2707	SouthernNorthAmerica_EH	USA_Nevada_SpiritCave_11000BP.SG	blueviolet	22	California_NorthernChannelIslands_LH	USA_CA_SantaRosa_300BP.Capt	violet	4	369745	4912	75.28	66722	NA	NA	NA	NA	NA	NA	NA	NA	NA	NA	NA	NA
Mbuti	AHUR770c	I1744	SouthernNorthAmerica_EH	USA_Nevada_SpiritCave_11000BP.SG	blueviolet	22	CentralAndes_LateIntermediate_LH	Peru_SanSebastian_LIP_600BP.Capt	orange1	11	368284	4974	74043	56991	NA	NA	NA	NA	NA	NA	NA	NA	NA	NA	NA	NA
Mbuti	AHUR770c	AR0152	SouthernNorthAmerica_EH	USA_Nevada_SpiritCave_11000BP.SG	blueviolet	22	Uspallata	LH-HG|LH-HG	darkorange4	23	351347	9557	36764	12554	NA	NA	NA	NA	38514	5866	65661	55677	394618	8658	45578	18119
Mbuti	AHUR770c	I11551	SouthernNorthAmerica_EH	USA_Nevada_SpiritCave_11000BP.SG	blueviolet	22	California_Central_LH	USA_CA_Carmel_600BP.Capt	palevioletred1	6	371274	7797	47615	20104	NA	NA	NA	NA	NA	NA	NA	NA	NA	NA	NA	NA
Mbuti	AHUR770c	Sumidouro4	SouthernNorthAmerica_EH	USA_Nevada_SpiritCave_11000BP.SG	blueviolet	22	Brazil_EH	Brazil_Sumidouro_10100BP.SG	palegreen1	22	360309	6051	59548	38293	NA	NA	NA	NA	379712	5102	74421	159197	381906	6305	60571	51601
Mbuti	AHUR770c	I17497	SouthernNorthAmerica_EH	USA_Nevada_SpiritCave_11000BP.SG	blueviolet	22	CentralAndes_LateIntermediate_LH	Chile_LIP_Pukara_600BP.Capt	orange1	1	364687	9286	39274	13862	NA	NA	NA	NA	NA	NA	NA	NA	NA	NA	NA	NA
Mbuti	AHUR770c	AR0512	SouthernNorthAmerica_EH	USA_Nevada_SpiritCave_11000BP.SG	blueviolet	22	Uspallata	LH-MF|LH-F	goldenrod1	21	362392	4504	80453	95997	NA	NA	NA	NA	39551	4607	85841	412295	398167	5259	75719	132174
Mbuti	AHUR770c	I12360	SouthernNorthAmerica_EH	USA_Nevada_SpiritCave_11000BP.SG	blueviolet	22	SouthPatagonia_LH	Argentina_MitrePeninsula_Haush_400BP.Capt	blue1	3	365523	11588	31544	8516	NA	NA	NA	NA	NA	NA	NA	NA	NA	NA	NA	NA
Mbuti	AHUR770c	SN-11	SouthernNorthAmerica_EH	USA_Nevada_SpiritCave_11000BP.SG	blueviolet	22	California_SouthernChannelIslands_LH	USA_CA_SanNicolas_1600BP.SG	violet	8	36034	4664	77256	82802	NA	NA	NA	NA	39121	4569	85623	352346	39468	5438	72578	113750
Mbuti	AHUR770c	CT-01	SouthernNorthAmerica_EH	USA_Nevada_SpiritCave_11000BP.SG	blueviolet	22	California_SouthernChannelIslands_LH	USA_CA_SanCatalina_400BP.SG	violet	6	363291	4604	78914	90379	NA	NA	NA	NA	393406	4649	84621	378923	398996	5286	75485	121315
Mbuti	AHUR770c	I2705	SouthernNorthAmerica_EH	USA_Nevada_SpiritCave_11000BP.SG	blueviolet	22	California_NorthernChannelIslands_LH	USA_CA_SantaRosa_300BP.Capt	violet	4	369963	5323	69499	56696	NA	NA	NA	NA	NA	NA	NA	NA	NA	NA	NA	NA
Mbuti	AHUR770c	KCA-1298	SouthernNorthAmerica_EH	USA_Nevada_SpiritCave_11000BP.SG	blueviolet	22	CentralAndes_LateHorizon_LH	Peru_Kusicancha1_LH.Capt	darkorange2	8	365214	5178	70538	62616	NA	NA	NA	NA	NA	NA	NA	NA	NA	NA	NA	NA
Mbuti	AHUR770c	I0045	SouthernNorthAmerica_EH	USA_Nevada_SpiritCave_11000BP.SG	blueviolet	22	CentralAndes_EarlyIntermediate_LH	Peru_Lima_EIP_1450BP.Capt	darkorange1	2	366255	7417	49379	22640	NA	NA	NA	NA	NA	NA	NA	NA	NA	NA	NA	NA
Mbuti	AHUR770c	I8575	SouthernNorthAmerica_EH	USA_Nevada_SpiritCave_11000BP.SG	blueviolet	22	SouthPatagonia_LH	Chile_SouthernContinent_Aonikenk_400BP.Capt	blue1	7	366465	5567	65824	41060	NA	NA	NA	NA	NA	NA	NA	NA	NA	NA	NA	NA
Mbuti	AHUR770c	SHN-575	SouthernNorthAmerica_EH	USA_Nevada_SpiritCave_11000BP.SG	blueviolet	22	CentralAndes_LateHorizon_LH	Peru_Sacsahuaman2_LH.Capt	darkorange2	13	364949	5128	71175	71561	NA	NA	NA	NA	NA	NA	NA	NA	NA	NA	NA	NA
Mbuti	AHUR770c	I0044	SouthernNorthAmerica_EH	USA_Nevada_SpiritCave_11000BP.SG	blueviolet	22	CentralAndes_LateIntermediate_LH	Peru_Lima_LIP_650BP.Capt	orange1	6	363309	4803	75643	79502	NA	NA	NA	NA	NA	NA	NA	NA	NA	NA	NA	NA
Mbuti	AHUR770c	I2250	SouthernNorthAmerica_EH	USA_Nevada_SpiritCave_11000BP.SG	blueviolet	22	CentralAndes_LateIntermediate_LH	Peru_Highlands_LIP_Chimu.Capt	orange1	5	361272	7303	49472	21904	NA	NA	NA	NA	NA	NA	NA	NA	NA	NA	NA	NA
Mbuti	AHUR770c	AR0500and513	SouthernNorthAmerica_EH	USA_Nevada_SpiritCave_11000BP.SG	blueviolet	22	Uspallata	LH-MF|LH-F	goldenrod1	21	367323	5565	66004	44519	NA	NA	NA	NA	388623	4874	79729	185977	395619	613	64533	59306
Mbuti	AHUR770c	QKI-9-3	SouthernNorthAmerica_EH	USA_Nevada_SpiritCave_11000BP.SG	blueviolet	22	CentralAndes_LateHorizon_LH	Peru_Qotakalli1_LH.Capt	darkorange2	10	374527	5623	66608	46137	NA	NA	NA	NA	NA	NA	NA	NA	NA	NA	NA	NA
Mbuti	AHUR770c	NC	SouthernNorthAmerica_EH	USA_Nevada_SpiritCave_11000BP.SG	blueviolet	22	California_SouthernMainland_LH	USA_CA_NewCuyama_1300BP.SG	palevioletred3	1	363007	5723	63427	38810	NA	NA	NA	NA	398388	4874	81745	155457	402712	6207	64882	49160
Mbuti	AHUR770c	I0976	SouthernNorthAmerica_EH	USA_Nevada_SpiritCave_11000BP.SG	blueviolet	22	CentralAndes_MiddleHorizon_LH	Bolivia_MH_Tiwanaku.Capt	orange2	3	35696	9633	37056	11791	NA	NA	NA	NA	NA	NA	NA	NA	NA	NA	NA	NA
Mbuti	AHUR770c	SHN-492	SouthernNorthAmerica_EH	USA_Nevada_SpiritCave_11000BP.SG	blueviolet	22	CentralAndes_LateHorizon_LH	Peru_Sacsahuaman3_LH.Capt	darkorange2	14	372466	552	67.47	49720	NA	NA	NA	NA	NA	NA	NA	NA	NA	NA	NA	NA
Mbuti	AHUR770c	I21452	SouthernNorthAmerica_EH	USA_Nevada_SpiritCave_11000BP.SG	blueviolet	22	California_SouthernMainland_LH	USA_CA_Goleta_900BP.Capt	palevioletred3	5	366604	5725	64031	42294	NA	NA	NA	NA	NA	NA	NA	NA	NA	NA	NA	NA
Mbuti	AHUR770c	SJArg-3	SouthernNorthAmerica_EH	USA_Nevada_SpiritCave_11000BP.SG	blueviolet	22	Cuyo_LH	Argentina_Callingasta_1500BP.SG	brown3	1	344849	12904	26724	5455	NA	NA	NA	NA	395489	841	47027	21941	399332	13044	30615	6993
Mbuti	AHUR770c	I2242	SouthernNorthAmerica_EH	USA_Nevada_SpiritCave_11000BP.SG	blueviolet	22	CentralAndes_MiddleHorizonLateIntermeditae_LH	Peru_MH_LIP_ElBrujo_850BP.Capt	darkorange3	1	363127	6748	53.81	29711	NA	NA	NA	NA	NA	NA	NA	NA	NA	NA	NA	NA
Mbuti	AHUR770c	I0967	SouthernNorthAmerica_EH	USA_Nevada_SpiritCave_11000BP.SG	blueviolet	22	CentralAndes_LateIntermediate_LH	Peru_LIP_Ychsma.Capt	orange1	9	354006	824	42964	16205	NA	NA	NA	NA	NA	NA	NA	NA	NA	NA	NA	NA
Mbuti	AHUR770c	I2560	SouthernNorthAmerica_EH	USA_Nevada_SpiritCave_11000BP.SG	blueviolet	22	CentralAndes_MiddleHorizon_LH	Peru_Ullujaya_MH_950BP.Capt	orange2	9	367395	5885	62427	44860	NA	NA	NA	NA	NA	NA	NA	NA	NA	NA	NA	NA
Mbuti	AHUR770c	I15176	SouthernNorthAmerica_EH	USA_Nevada_SpiritCave_11000BP.SG	blueviolet	22	California_Central_LH	USA_CA_CalaverasCounty_600BP.Capt	palevioletred1	7	371835	6045	61508	39250	NA	NA	NA	NA	NA	NA	NA	NA	NA	NA	NA	NA
Mbuti	AHUR770c	BC25	SouthernNorthAmerica_EH	USA_Nevada_SpiritCave_11000BP.SG	blueviolet	22	California_Baja_LH	Mexico_Pericues.SG	palevioletred1	3	35638	9499	37516	11949	NA	NA	NA	NA	391165	6231	62775	46350	392271	9828	39916	14130
Mbuti	AHUR770c	MIS3	SouthernNorthAmerica_EH	USA_Nevada_SpiritCave_11000BP.SG	blueviolet	22	CentralAndes_MiddleHorizon_LH	Bolivia_MH_Miraflores.Capt	orange2	2	361742	4849	74606	65964	NA	NA	NA	NA	NA	NA	NA	NA	NA	NA	NA	NA
Mbuti	AHUR770c	OTT-1144	SouthernNorthAmerica_EH	USA_Nevada_SpiritCave_11000BP.SG	blueviolet	22	CentralAndes_LateIntermediate_LH	Peru_Ollantaytambo_LIP.Capt	orange1	13	364068	4935	73776	63859	NA	NA	NA	NA	NA	NA	NA	NA	NA	NA	NA	NA
Mbuti	AHUR770c	I12355	SouthernNorthAmerica_EH	USA_Nevada_SpiritCave_11000BP.SG	blueviolet	22	SouthPatagonia_LH	Argentina_BeagleChannel_Yamana_1500BP.Capt	blue1	2	366298	5388	67985	51687	NA	NA	NA	NA	NA	NA	NA	NA	NA	NA	NA	NA
Mbuti	AHUR770c	Sumidouro7	SouthernNorthAmerica_EH	USA_Nevada_SpiritCave_11000BP.SG	blueviolet	22	Brazil_EH	Brazil_Sumidouro_10100BP.SG	palegreen1	22	352763	7008	50337	24591	NA	NA	NA	NA	388788	5303	73319	103775	386373	7186	53767	33803
Mbuti	AHUR770c	SN-10	SouthernNorthAmerica_EH	USA_Nevada_SpiritCave_11000BP.SG	blueviolet	22	California_SouthernChannelIslands_LH	USA_CA_SanNicolas_1600BP.SG	violet	8	363244	7406	49046	21513	NA	NA	NA	NA	390748	569	68672	85589	392486	8151	48151	26919
Mbuti	AHUR770c	AR0528	SouthernNorthAmerica_EH	USA_Nevada_SpiritCave_11000BP.SG	blueviolet	22	Uspallata	LH-MF|LH-F	goldenrod1	21	359598	5068	70.95	54232	NA	NA	NA	NA	392015	4775	82.09	224682	399259	6063	65852	71353
Mbuti	AHUR770c	I0755	SouthernNorthAmerica_EH	USA_Nevada_SpiritCave_11000BP.SG	blueviolet	22	California_SouthernChannelIslands_LH	USA_CA_SanClemente_500BP.Capt	violet	9	366603	5691	64419	39039	NA	NA	NA	NA	NA	NA	NA	NA	NA	NA	NA	NA
Mbuti	AHUR770c	I2558	SouthernNorthAmerica_EH	USA_Nevada_SpiritCave_11000BP.SG	blueviolet	22	CentralAndes_EarlyIntermediate_LH	Peru_Ullujaya_EIP_1350BP.Capt	darkorange1	5	363265	7046	51553	23892	NA	NA	NA	NA	NA	NA	NA	NA	NA	NA	NA	NA
Mbuti	AHUR770c	KMA-15A-1	SouthernNorthAmerica_EH	USA_Nevada_SpiritCave_11000BP.SG	blueviolet	22	CentralAndes_LateHorizon_LH	Peru_Kanamarka1_LH.Capt	darkorange2	5	363452	4796	75787	75711	NA	NA	NA	NA	NA	NA	NA	NA	NA	NA	NA	NA
Mbuti	AHUR770c	I1754	SouthernNorthAmerica_EH	USA_Nevada_SpiritCave_11000BP.SG	blueviolet	22	CentralChile_LH	Chile_Conchali_700BP.Capt	brown1	1	367298	5079	72311	68023	NA	NA	NA	NA	NA	NA	NA	NA	NA	NA	NA	NA
Mbuti	AHUR770c	I3565	SouthernNorthAmerica_EH	USA_Nevada_SpiritCave_11000BP.SG	blueviolet	22	California_NorthernChannelIslands_LH	USA_CA_SantaRosa_3000BP.Capt	violet	3	36875	5078	72616	64943	NA	NA	NA	NA	NA	NA	NA	NA	NA	NA	NA	NA
Mbuti	AHUR770c	I0969	SouthernNorthAmerica_EH	USA_Nevada_SpiritCave_11000BP.SG	blueviolet	22	CentralAndes_LateIntermediate_LH	Peru_Lima_LIP_650BP.Capt	orange1	6	383512	14586	26293	4997	NA	NA	NA	NA	NA	NA	NA	NA	NA	NA	NA	NA
Mbuti	AHUR770c	AR0162	SouthernNorthAmerica_EH	USA_Nevada_SpiritCave_11000BP.SG	blueviolet	22	Uspallata	LH-LF|LH-F	darkorange4	21	370031	5192	71264	63776	NA	NA	NA	NA	399023	4699	84.92	262543	403976	5819	69419	83897
Mbuti	AHUR770c	Lapa22	SouthernNorthAmerica_EH	USA_Nevada_SpiritCave_11000BP.SG	blueviolet	22	Brazil_EH	Brazil_LapaDoSanto_9600BP.Capt	palegreen1	21	363644	6156	59076	35476	NA	NA	NA	NA	NA	NA	NA	NA	NA	NA	NA	NA
Mbuti	AHUR770c	I3564	SouthernNorthAmerica_EH	USA_Nevada_SpiritCave_11000BP.SG	blueviolet	22	California_NorthernChannelIslands_LH	USA_CA_SantaRosa_3000BP.Capt	violet	3	361505	5052	71558	65034	NA	NA	NA	NA	NA	NA	NA	NA	NA	NA	NA	NA
Mbuti	AHUR770c	I2251	SouthernNorthAmerica_EH	USA_Nevada_SpiritCave_11000BP.SG	blueviolet	22	CentralAndes_LateIntermediate_LH	Peru_Highlands_LIP_Chimu.Capt	orange1	5	373498	531	70339	54140	NA	NA	NA	NA	NA	NA	NA	NA	NA	NA	NA	NA
Mbuti	AHUR770c	I7090	SouthernNorthAmerica_EH	USA_Nevada_SpiritCave_11000BP.SG	blueviolet	22	Pampa_MH	Argentina_ArroyoSeco2_7200BP.Capt	lightblue	21	355009	8182	43.39	16555	NA	NA	NA	NA	NA	NA	NA	NA	NA	NA	NA	NA
Mbuti	AHUR770c	Lovelock2	SouthernNorthAmerica_EH	USA_Nevada_SpiritCave_11000BP.SG	blueviolet	22	SouthernNorthAmerica_LH	USA_Nevada_LovelockCave_1850BP.SG	blueviolet	1	369038	4563	80878	98095	NA	NA	NA	NA	397031	459	86499	434948	396587	5211	76.1	140221
Mbuti	AHUR770c	I11967	SouthernNorthAmerica_EH	USA_Nevada_SpiritCave_11000BP.SG	blueviolet	22	California_NorthernChannelIslands_LH	USA_CA_SantaRosa_300BP.Capt	violet	4	370612	4954	74806	68042	NA	NA	NA	NA	NA	NA	NA	NA	NA	NA	NA	NA
Mbuti	AHUR770c	AM71	SouthernNorthAmerica_EH	USA_Nevada_SpiritCave_11000BP.SG	blueviolet	22	SouthPatagonia_LH	Chile_StraitOfMagellan_Kaweskar_100BP.SG	blue1	8	352517	11586	30426	7129	NA	NA	NA	NA	39516	7397	53419	30473	402613	11262	35749	9154
Mbuti	AHUR770c	IO2	SouthernNorthAmerica_EH	USA_Nevada_SpiritCave_11000BP.SG	blueviolet	22	CentralAndes_MiddleHorizon_LH	Bolivia_MH_Iroco_1050BP.Capt	orange2	1	37184	5427	68517	47244	NA	NA	NA	NA	NA	NA	NA	NA	NA	NA	NA	NA
Mbuti	AHUR770c	I0966	SouthernNorthAmerica_EH	USA_Nevada_SpiritCave_11000BP.SG	blueviolet	22	CentralAndes_LateIntermediate_LH	Peru_LIP_Ychsma.Capt	orange1	9	359901	7971	45154	18791	NA	NA	NA	NA	NA	NA	NA	NA	NA	NA	NA	NA
Mbuti	AHUR770c	Lovelock1	SouthernNorthAmerica_EH	USA_Nevada_SpiritCave_11000BP.SG	blueviolet	22	SouthernNorthAmerica_LH	USA_Nevada_LovelockCave_1850BP.SG	blueviolet	1	367176	4881	75.22	75396	NA	NA	NA	NA	395455	5075	77926	324761	403555	5907	68323	104599
Mbuti	AHUR770c	CR-01	SouthernNorthAmerica_EH	USA_Nevada_SpiritCave_11000BP.SG	blueviolet	22	California_NorthernChannelIslands_LH	USA_CA_SantaCruz_1000BP.SG	violet	2	370174	4736	78168	92254	NA	NA	NA	NA	397782	4702	84602	394426	401291	5371	74711	127007
Mbuti	AHUR770c	Ala1	SouthernNorthAmerica_EH	USA_Nevada_SpiritCave_11000BP.SG	blueviolet	22	California_Central_LH	USA_CA_SanFranciscoBay_300BP.SG	palevioletred1	5	368691	6341	58.14	31853	NA	NA	NA	NA	388296	4886	79471	139938	38683	6394	60.5	45811
Mbuti	AHUR770c	I1743	SouthernNorthAmerica_EH	USA_Nevada_SpiritCave_11000BP.SG	blueviolet	22	CentralAndes_LateHorizon_LH	Peru_SanSebastian_LH_500BP.Capt	darkorange2	2	358398	6201	57796	31938	NA	NA	NA	NA	NA	NA	NA	NA	NA	NA	NA	NA
Mbuti	AHUR770c	TOY-4-5	SouthernNorthAmerica_EH	USA_Nevada_SpiritCave_11000BP.SG	blueviolet	22	CentralAndes_LateIntermediate_LH	Peru_Torontoy_500BP.Capt	orange1	12	369013	5343	69059	49242	NA	NA	NA	NA	NA	NA	NA	NA	NA	NA	NA	NA
Mbuti	AHUR770c	Lapa25	SouthernNorthAmerica_EH	USA_Nevada_SpiritCave_11000BP.SG	blueviolet	22	Brazil_EH	Brazil_LapaDoSanto_9600BP.Capt	palegreen1	21	362124	587	61696	44449	NA	NA	NA	NA	NA	NA	NA	NA	NA	NA	NA	NA
Mbuti	AHUR770c	I2537	SouthernNorthAmerica_EH	USA_Nevada_SpiritCave_11000BP.SG	blueviolet	22	CentralAndes_LateIntermediate_LH	Chile_PicaOcho_700BP.Capt	orange1	3	366267	5704	64212	41453	NA	NA	NA	NA	NA	NA	NA	NA	NA	NA	NA	NA
Mbuti	AHUR770c	SM-01	SouthernNorthAmerica_EH	USA_Nevada_SpiritCave_11000BP.SG	blueviolet	22	California_NorthernChannelIslands_LH	USA_CA_SanMiguel_650BP.SG	violet	1	369844	10839	34122	9170	NA	NA	NA	NA	396659	6924	57286	36598	404887	10687	37886	11514
Mbuti	AHUR770c	I0238	SouthernNorthAmerica_EH	USA_Nevada_SpiritCave_11000BP.SG	blueviolet	22	CentralAndes_EH	Peru_Lauricocha_8600BP.Capt	darkorange4	22	395798	12941	30584	6851	NA	NA	NA	NA	NA	NA	NA	NA	NA	NA	NA	NA
Mbuti	AHUR770c	SN-44	SouthernNorthAmerica_EH	USA_Nevada_SpiritCave_11000BP.SG	blueviolet	22	California_SouthernChannelIslands_MH	USA_CA_SanNicolas_4800BP.SG	violet	23	37062	4701	78.84	92910	NA	NA	NA	NA	400125	4725	84692	397109	402348	5308	75805	127939
Mbuti	AHUR770c	I15172	SouthernNorthAmerica_EH	USA_Nevada_SpiritCave_11000BP.SG	blueviolet	22	California_Central_LH	USA_CA_CalaverasCounty_600BP.Capt	palevioletred1	7	371204	10002	37112	10913	NA	NA	NA	NA	NA	NA	NA	NA	NA	NA	NA	NA
Mbuti	AHUR770c	PS-06	SouthernNorthAmerica_EH	USA_Nevada_SpiritCave_11000BP.SG	blueviolet	22	California_SouthernMainland_LH	USA_CA_PointSal_1500BP.SG	palevioletred3	2	368221	5096	72251	65648	NA	NA	NA	NA	39746	4727	84088	266640	399025	5713	69839	85283
Mbuti	AHUR770c	AR0519	SouthernNorthAmerica_EH	USA_Nevada_SpiritCave_11000BP.SG	blueviolet	22	Uspallata	LH-MF|LH-F	goldenrod1	21	369275	4576	80.69	87462	NA	NA	NA	NA	394388	4508	87494	372901	397029	5184	76582	119771
Mbuti	AHUR770c	I1753	SouthernNorthAmerica_EH	USA_Nevada_SpiritCave_11000BP.SG	blueviolet	22	CentralChile_MH	Chile_LosRieles_5100BP.Capt	brown1	23	366753	514	71346	63946	NA	NA	NA	NA	NA	NA	NA	NA	NA	NA	NA	NA
Mbuti	AHUR770c	KCA-1364	SouthernNorthAmerica_EH	USA_Nevada_SpiritCave_11000BP.SG	blueviolet	22	CentralAndes_LateHorizon_LH	Peru_Kusicancha1_LH.Capt	darkorange2	8	365074	4832	75553	67917	NA	NA	NA	NA	NA	NA	NA	NA	NA	NA	NA	NA
Mbuti	AHUR770c	AR0506	SouthernNorthAmerica_EH	USA_Nevada_SpiritCave_11000BP.SG	blueviolet	22	Uspallata	LH-MF|LH-F	goldenrod1	21	360667	5338	67563	49672	NA	NA	NA	NA	395285	4666	84712	201763	40102	5876	68243	63824
Mbuti	AHUR770c	LAR001	SouthernNorthAmerica_EH	USA_Nevada_SpiritCave_11000BP.SG	blueviolet	22	Brazil_MH	Brazil_Laranjal_6600BP.Capt	palegreen4	22	367164	6652	55.2	33671	NA	NA	NA	NA	NA	NA	NA	NA	NA	NA	NA	NA
Mbuti	AHUR770c	I2244	SouthernNorthAmerica_EH	USA_Nevada_SpiritCave_11000BP.SG	blueviolet	22	CentralAndes_MiddleHorizonLateIntermeditae_LH	Peru_MH_LIP_Lambayeque.Capt	darkorange3	2	363164	5272	68882	51491	NA	NA	NA	NA	NA	NA	NA	NA	NA	NA	NA	NA
Mbuti	AHUR770c	I12362	SouthernNorthAmerica_EH	USA_Nevada_SpiritCave_11000BP.SG	blueviolet	22	SouthPatagonia_MH	Argentina_NorthTierradelFuego_LaArcillosa2_5800BP.Capt	blue3	21	364552	5059	72065	61120	NA	NA	NA	NA	NA	NA	NA	NA	NA	NA	NA	NA
Mbuti	AHUR770c	I0308	SouthernNorthAmerica_EH	USA_Nevada_SpiritCave_11000BP.SG	blueviolet	22	Pampa_MH	Argentina_ArroyoSeco2_7700BP.Capt	lightblue	22	37314	6292	59302	35232	NA	NA	NA	NA	NA	NA	NA	NA	NA	NA	NA	NA
Mbuti	AHUR770c	Sumidouro8	SouthernNorthAmerica_EH	USA_Nevada_SpiritCave_11000BP.SG	blueviolet	22	Brazil_EH	Brazil_Sumidouro_9800BP.SG	palegreen1	22	352721	10256	34.39	9331	NA	NA	NA	NA	388798	6642	58537	38812	403489	9855	40942	12717
Mbuti	AHUR770c	LAR002	SouthernNorthAmerica_EH	USA_Nevada_SpiritCave_11000BP.SG	blueviolet	22	Brazil_MH	Brazil_Laranjal_6800BP.Capt	palegreen4	23	365261	6908	52875	25380	NA	NA	NA	NA	NA	NA	NA	NA	NA	NA	NA	NA
Mbuti	AHUR770c	CCA-5-1	SouthernNorthAmerica_EH	USA_Nevada_SpiritCave_11000BP.SG	blueviolet	22	CentralAndes_LateHorizon_LH	Peru_CasaConcha2_LH.Capt	darkorange2	4	363755	504	72.18	71683	NA	NA	NA	NA	NA	NA	NA	NA	NA	NA	NA	NA
Mbuti	AHUR770c	TOY-7A-1	SouthernNorthAmerica_EH	USA_Nevada_SpiritCave_11000BP.SG	blueviolet	22	CentralAndes_LateIntermediate_LH	Peru_Torontoy_500BP.Capt	orange1	12	36256	481	75372	66136	NA	NA	NA	NA	NA	NA	NA	NA	NA	NA	NA	NA
Mbuti	AHUR770c	I11260	SouthernNorthAmerica_EH	USA_Nevada_SpiritCave_11000BP.SG	blueviolet	22	California_Central_LH	USA_CA_Carmel_600BP.Capt	palevioletred1	6	367901	4968	74049	59704	NA	NA	NA	NA	NA	NA	NA	NA	NA	NA	NA	NA
Mbuti	AHUR770c	I12356	SouthernNorthAmerica_EH	USA_Nevada_SpiritCave_11000BP.SG	blueviolet	22	SouthPatagonia_LH	Argentina_MitrePeninsula_Haush_400BP.Capt	blue1	3	364456	5553	65629	48754	NA	NA	NA	NA	NA	NA	NA	NA	NA	NA	NA	NA
Mbuti	AHUR770c	I15170	SouthernNorthAmerica_EH	USA_Nevada_SpiritCave_11000BP.SG	blueviolet	22	California_Central_LH	USA_CA_CalaverasCounty_1500BP.Capt	palevioletred1	8	370458	5266	70344	59447	NA	NA	NA	NA	NA	NA	NA	NA	NA	NA	NA	NA
Mbuti	AHUR770c	MOS001	SouthernNorthAmerica_EH	USA_Nevada_SpiritCave_11000BP.SG	blueviolet	22	Brazil_MH	Brazil_Moraes_5800BP.Capt	palegreen4	24	363775	7778	46768	21912	NA	NA	NA	NA	NA	NA	NA	NA	NA	NA	NA	NA
Mbuti	AHUR770c	Sumidouro5	SouthernNorthAmerica_EH	USA_Nevada_SpiritCave_11000BP.SG	blueviolet	22	Brazil_EH	Brazil_Sumidouro_10400BP.SG	palegreen1	22	365602	4767	76695	98046	NA	NA	NA	NA	395048	4759	83017	426819	397742	5463	72812	137628
Mbuti	AHUR770c	I2711	SouthernNorthAmerica_EH	USA_Nevada_SpiritCave_11000BP.SG	blueviolet	22	California_NorthernChannelIslands_MH	USA_CA_SantaRosa_7400BP.Capt	violet	21	368398	5909	62345	42922	NA	NA	NA	NA	NA	NA	NA	NA	NA	NA	NA	NA
Mbuti	AHUR770c	Anzick	SouthernNorthAmerica_EH	USA_Nevada_SpiritCave_11000BP.SG	blueviolet	22	SouthernNorthAmerica_EH	USA_Anzick.SG	blueviolet	21	360405	4611	78165	96920	NA	NA	NA	NA	391118	4672	83709	422002	392585	5348	73414	135341
Mbuti	AHUR770c	B-04	SouthernNorthAmerica_EH	USA_Nevada_SpiritCave_11000BP.SG	blueviolet	22	California_Baja_LH	Mexico_Baja_Comondu_Unknown.SG	palevioletred1	1	340334	1342	25.36	5222	NA	NA	NA	NA	391694	838	46744	21119	398722	13284	30015	6663
Mbuti	AHUR770c	I17114	SouthernNorthAmerica_EH	USA_Nevada_SpiritCave_11000BP.SG	blueviolet	22	SouthernNorthAmerica_LH	Mexico_Tayopa_1000BP.Capt	blueviolet	5	356084	11253	31644	8321	NA	NA	NA	NA	NA	NA	NA	NA	NA	NA	NA	NA
Mbuti	AHUR770c	Enoque65	SouthernNorthAmerica_EH	USA_Nevada_SpiritCave_11000BP.SG	blueviolet	22	Brazil_MH	Brazil_Enoque_3500BP.SG	palegreen4	21	NA	NA	NA	NA	NA	NA	NA	NA	404123	9112	44351	15861	NA	NA	NA	NA
Mbuti	AHUR770c	AM74	SouthernNorthAmerica_EH	USA_Nevada_SpiritCave_11000BP.SG	blueviolet	22	SouthPatagonia_LH	Chile_StraitOfMagellan_Kaweskar_100BP.SG	blue1	8	353098	5926	59589	31084	NA	NA	NA	NA	385119	4694	82.04	124910	39336	6384	61612	38739
Mbuti	AHUR770c	AR0505	SouthernNorthAmerica_EH	USA_Nevada_SpiritCave_11000BP.SG	blueviolet	22	Uspallata	LH-MF|LH-F	goldenrod1	21	356393	4659	76503	93608	NA	NA	NA	NA	386593	4813	80316	394546	390033	5545	70345	125839
Mbuti	AHUR770c	Sumidouro6	SouthernNorthAmerica_EH	USA_Nevada_SpiritCave_11000BP.SG	blueviolet	22	Brazil_EH	Brazil_Sumidouro_10100BP.SG	palegreen1	22	360967	5048	71505	65472	NA	NA	NA	NA	390538	4752	82186	266371	394089	5576	70681	85752
Mbuti	AHUR770c	Yaghan890	SouthernNorthAmerica_EH	USA_Nevada_SpiritCave_11000BP.SG	blueviolet	22	SouthPatagonia_LH	Argentina_BeagleChannel_Yamana_100BP.SG	blue1	1	346709	8257	41988	15319	NA	NA	NA	NA	393044	5665	69387	72101	39653	8575	46241	20873
Mbuti	AHUR770c	PS-17	SouthernNorthAmerica_EH	USA_Nevada_SpiritCave_11000BP.SG	blueviolet	22	California_SouthernMainland_LH	USA_CA_PointSal_1500BP.SG	palevioletred3	2	NA	NA	NA	NA	NA	NA	NA	NA	406365	9392	43266	16480	40473	14671	27586	5317
Mbuti	AHUR770c	I1358	SouthernNorthAmerica_EH	USA_Nevada_SpiritCave_11000BP.SG	blueviolet	22	CentralAndes_LateIntermediate_LH	Peru_LIP_Pacapaccari_600BP.Capt	orange1	8	372598	5619	66309	46696	NA	NA	NA	NA	NA	NA	NA	NA	NA	NA	NA	NA
Mbuti	AHUR770c	PS-03	SouthernNorthAmerica_EH	USA_Nevada_SpiritCave_11000BP.SG	blueviolet	22	California_SouthernMainland_LH	USA_CA_PointSal_1500BP.SG	palevioletred3	2	357028	10744	33232	9081	NA	NA	NA	NA	398456	679	58685	37052	400193	1057	37.86	11791
Mbuti	AHUR770c	SN-20	SouthernNorthAmerica_EH	USA_Nevada_SpiritCave_11000BP.SG	blueviolet	22	California_SouthernChannelIslands_MH	USA_CA_SanNicolas_4800BP.SG	violet	23	370238	14087	26282	4723	NA	NA	NA	NA	406482	8394	48427	18947	401604	13614	29499	6050
Mbuti	AHUR770c	SN-32	SouthernNorthAmerica_EH	USA_Nevada_SpiritCave_11000BP.SG	blueviolet	22	California_SouthernChannelIslands_MH	USA_CA_SanNicolas_4800BP.SG	violet	23	36138	11035	32748	9338	NA	NA	NA	NA	404211	7067	57.2	37869	4151	10249	40.5	12342
Mbuti	AHUR770c	MX-01	SouthernNorthAmerica_EH	USA_Nevada_SpiritCave_11000BP.SG	blueviolet	22	California_Baja_LH	Mexico_Baja_IronSprings_Unknown.SG	palevioletred1	2	354654	11052	32088	8175	NA	NA	NA	NA	379974	6701	56705	34298	39367	10253	38397	11130
Mbuti	AHUR770c	I0042	SouthernNorthAmerica_EH	USA_Nevada_SpiritCave_11000BP.SG	blueviolet	22	CentralAndes_LateIntermediate_LH	Peru_LIP_Botigiriayocc_600BP.Capt	orange1	7	363796	4509	80.69	87788	NA	NA	NA	NA	NA	NA	NA	NA	NA	NA	NA	NA
Mbuti	AHUR770c	I0964	SouthernNorthAmerica_EH	USA_Nevada_SpiritCave_11000BP.SG	blueviolet	22	CentralAndes_LateIntermediate_LH	Peru_Lima_LIP_650BP.Capt	orange1	6	393299	12035	32.68	7130	NA	NA	NA	NA	NA	NA	NA	NA	NA	NA	NA	NA
Mbuti	AHUR770c	AR0504	SouthernNorthAmerica_EH	USA_Nevada_SpiritCave_11000BP.SG	blueviolet	22	Uspallata	LH-MF|LH-F	goldenrod1	21	359348	4557	78856	94355	NA	NA	NA	NA	388488	4462	87061	400830	392656	5245	74862	128254
Mbuti	AHUR770c	Lapa14	SouthernNorthAmerica_EH	USA_Nevada_SpiritCave_11000BP.SG	blueviolet	22	Brazil_EH	Brazil_LapaDoSanto_9600BP.Capt	palegreen1	21	355667	6003	59253	37473	NA	NA	NA	NA	NA	NA	NA	NA	NA	NA	NA	NA
Mbuti	AHUR770c	SA5832	SouthernNorthAmerica_EH	USA_Nevada_SpiritCave_11000BP.SG	blueviolet	22	SouthPatagonia_MH	Chile_PuntaSantaAna_7300BP.SG	blue3	22	365357	5072	72035	65243	NA	NA	NA	NA	395124	4838	81679	278633	400706	5778	69349	88424
Mbuti	AHUR770c	AR0508	SouthernNorthAmerica_EH	USA_Nevada_SpiritCave_11000BP.SG	blueviolet	22	Uspallata	LH-MF|LH-F	goldenrod1	21	369063	5509	66992	52082	NA	NA	NA	NA	394781	4698	84.04	215522	3998	5788	69072	68376
Mbuti	AHUR770c	I12376	SouthernNorthAmerica_EH	USA_Nevada_SpiritCave_11000BP.SG	blueviolet	22	Pampa_LH	Argentina_LagunaToro_2400BP.Capt	lightblue	2	368737	8935	41.27	14235	NA	NA	NA	NA	NA	NA	NA	NA	NA	NA	NA	NA
Mbuti	AHUR770c	I5457	SouthernNorthAmerica_EH	USA_Nevada_SpiritCave_11000BP.SG	blueviolet	22	CentralAmerica_MH	Belize_7400BP.Capt	mediumvioletred	24	351403	77	45638	21358	NA	NA	NA	NA	NA	NA	NA	NA	NA	NA	NA	NA
Mbuti	AHUR770c	OTT-1174	SouthernNorthAmerica_EH	USA_Nevada_SpiritCave_11000BP.SG	blueviolet	22	CentralAndes_LateIntermediate_LH	Peru_Ollantaytambo_LIP.Capt	orange1	13	36907	5361	68846	51173	NA	NA	NA	NA	NA	NA	NA	NA	NA	NA	NA	NA
Mbuti	AHUR770c	I12358	SouthernNorthAmerica_EH	USA_Nevada_SpiritCave_11000BP.SG	blueviolet	22	SouthPatagonia_LH	Argentina_MitrePeninsula_Haush_400BP.Capt	blue1	3	365601	4946	73913	61419	NA	NA	NA	NA	NA	NA	NA	NA	NA	NA	NA	NA
Mbuti	AHUR770c	I11969	SouthernNorthAmerica_EH	USA_Nevada_SpiritCave_11000BP.SG	blueviolet	22	California_NorthernChannelIslands_LH	USA_CA_SantaRosa_3200BP.Capt	violet	5	372982	4898	76147	69799	NA	NA	NA	NA	NA	NA	NA	NA	NA	NA	NA	NA
Mbuti	AHUR770c	AR0180	SouthernNorthAmerica_EH	USA_Nevada_SpiritCave_11000BP.SG	blueviolet	22	Uspallata	LH-LF|LH-F	darkorange4	22	369914	10768	34354	9509	NA	NA	NA	NA	396202	6825	58052	41848	406107	98	41441	13765
Mbuti	AHUR770c	I8351	SouthernNorthAmerica_EH	USA_Nevada_SpiritCave_11000BP.SG	blueviolet	22	Pampa_LH	Argentina_LagunaChica_1600BP.Capt	lightblue	1	36666	5519	66438	48958	NA	NA	NA	NA	NA	NA	NA	NA	NA	NA	NA	NA
Mbuti	AHUR770c	Cuncaicha15-03	SouthernNorthAmerica_EH	USA_Nevada_SpiritCave_11000BP.SG	blueviolet	22	CentralAndes_MH	Peru_Cuncaicha_4200BP.Capt	orange4	21	368326	5205	70759	57645	NA	NA	NA	NA	NA	NA	NA	NA	NA	NA	NA	NA
Mbuti	AHUR770c	I15174	SouthernNorthAmerica_EH	USA_Nevada_SpiritCave_11000BP.SG	blueviolet	22	California_Central_LH	USA_CA_CalaverasCounty_600BP.Capt	palevioletred1	7	365872	5171	70754	53943	NA	NA	NA	NA	NA	NA	NA	NA	NA	NA	NA	NA
Mbuti	AHUR770c	SC-05	SouthernNorthAmerica_EH	USA_Nevada_SpiritCave_11000BP.SG	blueviolet	22	California_SouthernChannelIslands_LH	USA_CA_SanClemente_900BP.SG	violet	7	361338	4493	80417	94648	NA	NA	NA	NA	394437	4545	86783	399875	400411	5167	77495	127733
Mbuti	AHUR770c	AR0518	SouthernNorthAmerica_EH	USA_Nevada_SpiritCave_11000BP.SG	blueviolet	22	Uspallata	LH-MF|LH-F	goldenrod1	21	365723	4746	77063	88052	NA	NA	NA	NA	394058	4648	84773	377577	395284	5396	73251	121122
Mbuti	AHUR770c	I2236	SouthernNorthAmerica_EH	USA_Nevada_SpiritCave_11000BP.SG	blueviolet	22	CentralAndes_LateIntermediate_LH	Peru_Chanka_LIP.Capt	orange1	4	375173	8556	43.85	16574	NA	NA	NA	NA	NA	NA	NA	NA	NA	NA	NA	NA
Mbuti	AHUR770c	TOY-1-1	SouthernNorthAmerica_EH	USA_Nevada_SpiritCave_11000BP.SG	blueviolet	22	CentralAndes_LateIntermediate_LH	Peru_Torontoy_500BP.Capt	orange1	12	367227	4999	73461	59640	NA	NA	NA	NA	NA	NA	NA	NA	NA	NA	NA	NA
Mbuti	AHUR770c	PS-09	SouthernNorthAmerica_EH	USA_Nevada_SpiritCave_11000BP.SG	blueviolet	22	California_SouthernMainland_LH	USA_CA_PointSal_1500BP.SG	palevioletred3	2	343031	10906	31455	8013	NA	NA	NA	NA	382457	7169	53.35	32027	393645	10805	36433	10173
Mbuti	AHUR770c	AR0151	SouthernNorthAmerica_EH	USA_Nevada_SpiritCave_11000BP.SG	blueviolet	22	Uspallata	LH-HG|LH-HG	darkorange4	23	360698	6462	55.82	32128	NA	NA	NA	NA	390257	5139	75.94	142909	386593	6539	59117	46627
Mbuti	AHUR770c	I2237	SouthernNorthAmerica_EH	USA_Nevada_SpiritCave_11000BP.SG	blueviolet	22	CentralAndes_EarlyIntermediate_LH	Peru_ElBrujo_EIP_1300BP.Capt	darkorange1	1	372058	6455	57.64	29460	NA	NA	NA	NA	NA	NA	NA	NA	NA	NA	NA	NA
Mbuti	AHUR770c	I11285	SouthernNorthAmerica_EH	USA_Nevada_SpiritCave_11000BP.SG	blueviolet	22	California_SouthernMainland_LH	USA_CA_LakeCachuma_400BP.Capt	palevioletred3	4	375643	6423	58484	28016	NA	NA	NA	NA	NA	NA	NA	NA	NA	NA	NA	NA
Mbuti	AHUR770c	I2704	SouthernNorthAmerica_EH	USA_Nevada_SpiritCave_11000BP.SG	blueviolet	22	California_NorthernChannelIslands_LH	USA_CA_SantaRosa_300BP.Capt	violet	4	36924	5159	71.57	60700	NA	NA	NA	NA	NA	NA	NA	NA	NA	NA	NA	NA
Mbuti	AHUR770c	KMA-19-1	SouthernNorthAmerica_EH	USA_Nevada_SpiritCave_11000BP.SG	blueviolet	22	CentralAndes_LateHorizon_LH	Peru_Kanamarka3_LH.Capt	darkorange2	7	365392	468	78082	73429	NA	NA	NA	NA	NA	NA	NA	NA	NA	NA	NA	NA
Mbuti	AHUR770c	SN-17	SouthernNorthAmerica_EH	USA_Nevada_SpiritCave_11000BP.SG	blueviolet	22	California_SouthernChannelIslands_MH	USA_CA_SanNicolas_4800BP.SG	violet	23	366673	5053	72569	85513	NA	NA	NA	NA	397519	4895	81206	362548	401446	5594	71758	117440
Mbuti	AHUR770c	333B	SouthernNorthAmerica_EH	USA_Nevada_SpiritCave_11000BP.SG	blueviolet	22	CentralAmerica_LH	Mexico_SierraGorda_Postclassic.SG	darkviolet	3	366018	4674	78317	81131	NA	NA	NA	NA	393963	4562	86348	348771	397955	5171	76956	111100
Mbuti	AHUR770c	I2538	SouthernNorthAmerica_EH	USA_Nevada_SpiritCave_11000BP.SG	blueviolet	22	CentralAndes_MiddleHorizon_LH	Chile_CaletaHuelen_MH_1100BP.Capt	orange2	5	360563	9429	38242	12134	NA	NA	NA	NA	NA	NA	NA	NA	NA	NA	NA	NA
Mbuti	AHUR770c	I0977	SouthernNorthAmerica_EH	USA_Nevada_SpiritCave_11000BP.SG	blueviolet	22	CentralAndes_MiddleHorizon_LH	Bolivia_MH_Tiwanaku.Capt	orange2	3	344375	14284	24109	4476	NA	NA	NA	NA	NA	NA	NA	NA	NA	NA	NA	NA
Mbuti	AHUR770c	MIS5	SouthernNorthAmerica_EH	USA_Nevada_SpiritCave_11000BP.SG	blueviolet	22	CentralAndes_MiddleHorizon_LH	Bolivia_MH_Miraflores.Capt	orange2	2	372901	5902	63.18	37001	NA	NA	NA	NA	NA	NA	NA	NA	NA	NA	NA	NA
Mbuti	AHUR770c	SN-13	SouthernNorthAmerica_EH	USA_Nevada_SpiritCave_11000BP.SG	blueviolet	22	California_SouthernChannelIslands_LH	USA_CA_SanNicolas_1600BP.SG	violet	8	358922	5441	65.96	44697	NA	NA	NA	NA	386376	4591	84157	182134	390223	6107	63893	57946
Mbuti	AHUR770c	I14009	SouthernNorthAmerica_EH	USA_Nevada_SpiritCave_11000BP.SG	blueviolet	22	CentralAndes_LateIntermediate_LH	Chile_LIP_Pukara_700BP.Capt	orange1	2	375729	8482	44296	15237	NA	NA	NA	NA	NA	NA	NA	NA	NA	NA	NA	NA
Mbuti	AHUR770c	Cuncaicha15-07	SouthernNorthAmerica_EH	USA_Nevada_SpiritCave_11000BP.SG	blueviolet	22	CentralAndes_EH	Peru_Cuncaicha_9000BP.Capt	darkorange4	21	363212	5224	69528	58806	NA	NA	NA	NA	NA	NA	NA	NA	NA	NA	NA	NA
Mbuti	AHUR770c	I7086	SouthernNorthAmerica_EH	USA_Nevada_SpiritCave_11000BP.SG	blueviolet	22	Pampa_MH	Argentina_ArroyoSeco2_7700BP.Capt	lightblue	22	359649	10897	33005	8461	NA	NA	NA	NA	NA	NA	NA	NA	NA	NA	NA	NA
Mbuti	AHUR770c	I2540	SouthernNorthAmerica_EH	USA_Nevada_SpiritCave_11000BP.SG	blueviolet	22	CentralAndes_MiddleHorizon_LH	Chile_CaletaHuelen_MH_1100BP.Capt	orange2	5	368	6467	56906	32626	NA	NA	NA	NA	NA	NA	NA	NA	NA	NA	NA	NA
Mbuti	AHUR770c	2417Q	SouthernNorthAmerica_EH	USA_Nevada_SpiritCave_11000BP.SG	blueviolet	22	CentralAmerica_LH	Mexico_SierraGorda_Terminalclassic.SG	darkviolet	4	366109	4635	78985	95627	NA	NA	NA	NA	394584	4551	86708	418084	396717	5258	75448	134189
Mbuti	AHUR770c	I0752	SouthernNorthAmerica_EH	USA_Nevada_SpiritCave_11000BP.SG	blueviolet	22	California_SouthernChannelIslands_LH	USA_CA_SanClemente_500BP.Capt	violet	9	354643	7883	44988	18580	NA	NA	NA	NA	NA	NA	NA	NA	NA	NA	NA	NA
Mbuti	AHUR770c	I2252	SouthernNorthAmerica_EH	USA_Nevada_SpiritCave_11000BP.SG	blueviolet	22	CentralAndes_MiddleHorizon_LH	Peru_Highlands_Chinchawas_MH.Capt	orange2	7	367101	6761	54298	30117	NA	NA	NA	NA	NA	NA	NA	NA	NA	NA	NA	NA
Mbuti	AHUR770c	I0237	SouthernNorthAmerica_EH	USA_Nevada_SpiritCave_11000BP.SG	blueviolet	22	CentralAndes_MiddleHorizon_LH	Peru_Laramate_900BP.Capt	orange2	8	369391	688	53694	31157	NA	NA	NA	NA	NA	NA	NA	NA	NA	NA	NA	NA
Mbuti	AHUR770c	I0039	SouthernNorthAmerica_EH	USA_Nevada_SpiritCave_11000BP.SG	blueviolet	22	CentralAndes_MH	Peru_Lauricocha_3500BP.Capt	orange4	23	361862	5361	67496	49147	NA	NA	NA	NA	NA	NA	NA	NA	NA	NA	NA	NA
Mbuti	AHUR770c	I0978	SouthernNorthAmerica_EH	USA_Nevada_SpiritCave_11000BP.SG	blueviolet	22	CentralAndes_MiddleHorizon_LH	Bolivia_MH_Tiwanaku.Capt	orange2	3	357563	8883	40252	14620	NA	NA	NA	NA	NA	NA	NA	NA	NA	NA	NA	NA
Mbuti	AHUR770c	I0756	SouthernNorthAmerica_EH	USA_Nevada_SpiritCave_11000BP.SG	blueviolet	22	California_SouthernChannelIslands_LH	USA_CA_SanClemente_500BP.Capt	violet	9	35577	4823	73772	67719	NA	NA	NA	NA	NA	NA	NA	NA	NA	NA	NA	NA
Mbuti	AHUR770c	SN-52	SouthernNorthAmerica_EH	USA_Nevada_SpiritCave_11000BP.SG	blueviolet	22	California_SouthernChannelIslands_LH	USA_CA_SanNicolas_1600BP.SG	violet	8	370064	7736	47838	16965	NA	NA	NA	NA	395114	5769	68489	66329	395661	8299	47673	20840
Mbuti	AHUR770c	I1396	SouthernNorthAmerica_EH	USA_Nevada_SpiritCave_11000BP.SG	blueviolet	22	CentralAndes_LateIntermediate_LH	Peru_LIP_Pacapaccari_600BP.Capt	orange1	8	35536	13164	26996	5638	NA	NA	NA	NA	NA	NA	NA	NA	NA	NA	NA	NA
Mbuti	AHUR770c	I12943	SouthernNorthAmerica_EH	USA_Nevada_SpiritCave_11000BP.SG	blueviolet	22	SouthPatagonia_LH	Argentina_BeagleChannel_Yamana_100BP.Capt	blue1	1	363421	4933	73665	69292	NA	NA	NA	NA	NA	NA	NA	NA	NA	NA	NA	NA
Mbuti	AHUR770c	I21250	SouthernNorthAmerica_EH	USA_Nevada_SpiritCave_11000BP.SG	blueviolet	22	California_SouthernMainland_LH	USA_CA_Goleta_900BP.Capt	palevioletred3	5	36379	4934	73738	58002	NA	NA	NA	NA	NA	NA	NA	NA	NA	NA	NA	NA
Mbuti	AHUR770c	Lapa24	SouthernNorthAmerica_EH	USA_Nevada_SpiritCave_11000BP.SG	blueviolet	22	Brazil_EH	Brazil_LapaDoSanto_9200BP.Capt	palegreen1	21	367106	5675	64691	53988	NA	NA	NA	NA	NA	NA	NA	NA	NA	NA	NA	NA
Mbuti	AHUR770c	SN-16	SouthernNorthAmerica_EH	USA_Nevada_SpiritCave_11000BP.SG	blueviolet	22	California_SouthernChannelIslands_LH	USA_CA_SanNicolas_1600BP.SG	violet	8	354638	9547	37146	10593	NA	NA	NA	NA	395178	6278	62945	41769	401408	9911	40.5	13261
Mbuti	AHUR770c	I11296	SouthernNorthAmerica_EH	USA_Nevada_SpiritCave_11000BP.SG	blueviolet	22	California_SouthernMainland_LH	USA_CA_Goleta_2600BP.Capt	palevioletred3	7	37188	4983	74637	63039	NA	NA	NA	NA	NA	NA	NA	NA	NA	NA	NA	NA
Mbuti	AHUR770c	I2551	SouthernNorthAmerica_EH	USA_Nevada_SpiritCave_11000BP.SG	blueviolet	22	CentralAndes_MiddleHorizon_LH	Peru_Laramate_900BP.Capt	orange2	8	362705	5018	72278	62027	NA	NA	NA	NA	NA	NA	NA	NA	NA	NA	NA	NA
Mbuti	AHUR770c	MIS7	SouthernNorthAmerica_EH	USA_Nevada_SpiritCave_11000BP.SG	blueviolet	22	CentralAndes_MiddleHorizon_LH	Bolivia_MiraFlores_MH.Capt	orange2	4	36477	5408	67453	57483	NA	NA	NA	NA	NA	NA	NA	NA	NA	NA	NA	NA
Mbuti	AHUR770c	KMA-28-1	SouthernNorthAmerica_EH	USA_Nevada_SpiritCave_11000BP.SG	blueviolet	22	CentralAndes_LateHorizon_LH	Peru_Kanamarka1_LH.Capt	darkorange2	5	362605	4749	76358	72961	NA	NA	NA	NA	NA	NA	NA	NA	NA	NA	NA	NA
Mbuti	AHUR770c	I11288	SouthernNorthAmerica_EH	USA_Nevada_SpiritCave_11000BP.SG	blueviolet	22	California_SouthernMainland_MH	USA_CA_Goleta_4700BP.Capt	palevioletred3	21	369838	5143	71918	61083	NA	NA	NA	NA	NA	NA	NA	NA	NA	NA	NA	NA
Mbuti	AHUR770c	I12367	SouthernNorthAmerica_EH	USA_Nevada_SpiritCave_11000BP.SG	blueviolet	22	SouthPatagonia_LH	Argentina_NorthTierradelFuego_Selknam_500BP.Capt	blue1	5	368424	6536	56366	29139	NA	NA	NA	NA	NA	NA	NA	NA	NA	NA	NA	NA
Mbuti	AHUR770c	AR0149	SouthernNorthAmerica_EH	USA_Nevada_SpiritCave_11000BP.SG	blueviolet	22	Uspallata	LH-HG|LH-HG	darkorange4	23	35566	7696	46212	19299	NA	NA	NA	NA	39105	5649	69.23	85465	386982	7192	53811	27875
Mbuti	AHUR770c	SC-06	SouthernNorthAmerica_EH	USA_Nevada_SpiritCave_11000BP.SG	blueviolet	22	California_SouthernChannelIslands_LH	USA_CA_SanClemente_900BP.SG	violet	7	367101	8497	43203	14861	NA	NA	NA	NA	404508	6271	64504	59772	4032	8678	46465	19023
Mbuti	AHUR770c	SC-01	SouthernNorthAmerica_EH	USA_Nevada_SpiritCave_11000BP.SG	blueviolet	22	California_SouthernChannelIslands_LH	USA_CA_SanClemente_900BP.SG	violet	7	369094	8084	45656	17410	NA	NA	NA	NA	383265	5956	64.35	71841	38766	833	46539	23249
Mbuti	AHUR770c	I0968	SouthernNorthAmerica_EH	USA_Nevada_SpiritCave_11000BP.SG	blueviolet	22	CentralAndes_MiddleHorizon_LH	Peru_LimaCoast_MH_1000BP.Capt	orange2	10	383098	13658	2025-05-28	5547	NA	NA	NA	NA	NA	NA	NA	NA	NA	NA	NA	NA
Mbuti	AHUR770c	I3443	SouthernNorthAmerica_EH	USA_Nevada_SpiritCave_11000BP.SG	blueviolet	22	CentralAmerica_EH	Belize_9400BP.Capt	mediumvioletred	21	366786	6635	55283	32879	NA	NA	NA	NA	NA	NA	NA	NA	NA	NA	NA	NA
Mbuti	AHUR770c	I17109	SouthernNorthAmerica_EH	USA_Nevada_SpiritCave_11000BP.SG	blueviolet	22	SouthernNorthAmerica_LH	Mexico_Tayopa_1000BP.Capt	blueviolet	5	351699	11406	30834	8452	NA	NA	NA	NA	NA	NA	NA	NA	NA	NA	NA	NA
Mbuti	AHUR770c	KCA-3089	SouthernNorthAmerica_EH	USA_Nevada_SpiritCave_11000BP.SG	blueviolet	22	CentralAndes_LateHorizon_LH	Peru_Kusicancha2_LH.Capt	darkorange2	9	36611	4929	74272	63093	NA	NA	NA	NA	NA	NA	NA	NA	NA	NA	NA	NA
Mbuti	AHUR770c	I2261	SouthernNorthAmerica_EH	USA_Nevada_SpiritCave_11000BP.SG	blueviolet	22	CentralAndes_MH	Peru_LaGalgada_4100BP.Capt	orange4	22	360546	4804	75048	76990	NA	NA	NA	NA	NA	NA	NA	NA	NA	NA	NA	NA
Mbuti	AHUR770c	AR0527	SouthernNorthAmerica_EH	USA_Nevada_SpiritCave_11000BP.SG	blueviolet	22	Uspallata	LH-MF|LH-F	goldenrod1	21	360802	5372	67163	57981	NA	NA	NA	NA	392683	4958	79201	236950	395856	5992	66067	75212
Mbuti	AHUR770c	I8576	SouthernNorthAmerica_EH	USA_Nevada_SpiritCave_11000BP.SG	blueviolet	22	SouthPatagonia_LH	Chile_NorthTierradelFuego_Selknam_100BP.Capt	blue1	6	370856	526	70511	54769	NA	NA	NA	NA	NA	NA	NA	NA	NA	NA	NA	NA
Mbuti	AHUR770c	MA577	SouthernNorthAmerica_EH	USA_Nevada_SpiritCave_11000BP.SG	blueviolet	22	SouthPatagonia_LH	Argentina_NorthTierradelFiego_Selknam_100BP.SG	blue1	4	360653	5009	72008	68788	NA	NA	NA	NA	390593	4477	87245	276405	390184	5549	70.32	85904
Mbuti	AHUR770c	I12359	SouthernNorthAmerica_EH	USA_Nevada_SpiritCave_11000BP.SG	blueviolet	22	SouthPatagonia_LH	Argentina_MitrePeninsula_Haush_400BP.Capt	blue1	3	359097	6807	52755	24867	NA	NA	NA	NA	NA	NA	NA	NA	NA	NA	NA	NA
Mbuti	AHUR770c	I12354	SouthernNorthAmerica_EH	USA_Nevada_SpiritCave_11000BP.SG	blueviolet	22	SouthPatagonia_LH	Argentina_NorthTierradelFuego_Selknam_500BP.Capt	blue1	5	361031	4826	74816	73479	NA	NA	NA	NA	NA	NA	NA	NA	NA	NA	NA	NA
Mbuti	AHUR770c	AR0517	SouthernNorthAmerica_EH	USA_Nevada_SpiritCave_11000BP.SG	blueviolet	22	Uspallata	LH-MFout|LH-F	goldenrod1	23	355603	6426	55336	30459	NA	NA	NA	NA	388795	5116	76	124537	393319	6756	58219	39971
Mbuti	AHUR770c	MIS6	SouthernNorthAmerica_EH	USA_Nevada_SpiritCave_11000BP.SG	blueviolet	22	CentralAndes_MiddleHorizon_LH	Bolivia_MiraFlores_MH.Capt	orange2	4	364627	11207	32535	8423	NA	NA	NA	NA	NA	NA	NA	NA	NA	NA	NA	NA
Mbuti	AHUR770c	I17113	SouthernNorthAmerica_EH	USA_Nevada_SpiritCave_11000BP.SG	blueviolet	22	SouthernNorthAmerica_LH	Mexico_Tayopa_1000BP.Capt	blueviolet	5	351746	9613	36589	10747	NA	NA	NA	NA	NA	NA	NA	NA	NA	NA	NA	NA
Mbuti	AHUR770c	Lapa05	SouthernNorthAmerica_EH	USA_Nevada_SpiritCave_11000BP.SG	blueviolet	22	Brazil_EH	Brazil_LapaDoSanto_9600BP.Capt	palegreen1	21	340335	9947	34216	11534	NA	NA	NA	NA	NA	NA	NA	NA	NA	NA	NA	NA
Mbuti	AHUR770c	I0760	SouthernNorthAmerica_EH	USA_Nevada_SpiritCave_11000BP.SG	blueviolet	22	California_SouthernChannelIslands_LH	USA_CA_SanClemente_500BP.Capt	violet	9	364451	4734	76983	75302	NA	NA	NA	NA	NA	NA	NA	NA	NA	NA	NA	NA
Mbuti	AHUR770c	I11557	SouthernNorthAmerica_EH	USA_Nevada_SpiritCave_11000BP.SG	blueviolet	22	California_NorthernChannelIslands_MH	USA_CA_SantaRosa_7400BP.Capt	violet	21	367936	5012	73407	70260	NA	NA	NA	NA	NA	NA	NA	NA	NA	NA	NA	NA
Mbuti	AHUR770c	I2549	SouthernNorthAmerica_EH	USA_Nevada_SpiritCave_11000BP.SG	blueviolet	22	CentralAndes_LateIntermediate_LH	Peru_Palpa_LIP_550BP.Capt	orange1	10	365537	6637	55074	31564	NA	NA	NA	NA	NA	NA	NA	NA	NA	NA	NA	NA
Mbuti	AHUR770c	Lovelock3	SouthernNorthAmerica_EH	USA_Nevada_SpiritCave_11000BP.SG	blueviolet	22	SouthernNorthAmerica_LH	USA_Nevada_LovelockCave_600BP.SG	blueviolet	2	364326	4527	80483	98202	NA	NA	NA	NA	391775	439	89244	435403	396833	4946	80234	140250
Mbuti	AHUR770c	I1479	SouthernNorthAmerica_EH	USA_Nevada_SpiritCave_11000BP.SG	blueviolet	22	CentralAndes_LateIntermediate_LH	Peru_Palpa_LIP_550BP.Capt	orange1	10	366402	5596	65476	44872	NA	NA	NA	NA	NA	NA	NA	NA	NA	NA	NA	NA
Mbuti	AHUR770c	KMA-2-2	SouthernNorthAmerica_EH	USA_Nevada_SpiritCave_11000BP.SG	blueviolet	22	CentralAndes_LateHorizon_LH	Peru_Kanamarka2_LH.Capt	darkorange2	6	362841	4889	74214	70276	NA	NA	NA	NA	NA	NA	NA	NA	NA	NA	NA	NA
Mbuti	AHUR770c	I11558	SouthernNorthAmerica_EH	USA_Nevada_SpiritCave_11000BP.SG	blueviolet	22	California_NorthernChannelIslands_MH	USA_CA_SantaRosa_7400BP.Capt	violet	21	367754	5072	72511	69190	NA	NA	NA	NA	NA	NA	NA	NA	NA	NA	NA	NA
Mbuti	AHUR770c	AR0509	SouthernNorthAmerica_EH	USA_Nevada_SpiritCave_11000BP.SG	blueviolet	22	Uspallata	LH-MF|LH-F	goldenrod1	21	368776	4817	76557	75910	NA	NA	NA	NA	396214	4772	83025	320807	399618	5562	71844	102569
Mbuti	AHUR770c	I11295	SouthernNorthAmerica_EH	USA_Nevada_SpiritCave_11000BP.SG	blueviolet	22	California_SouthernMainland_LH	USA_CA_Goleta_400BP.Capt	palevioletred3	6	369341	5031	73417	62332	NA	NA	NA	NA	NA	NA	NA	NA	NA	NA	NA	NA
Mbuti	AHUR770c	Yaghan895	SouthernNorthAmerica_EH	USA_Nevada_SpiritCave_11000BP.SG	blueviolet	22	SouthPatagonia_LH	Argentina_BeagleChannel_Yamana_100BP.SG	blue1	1	359767	5519	65183	47034	NA	NA	NA	NA	402433	4936	81531	186945	407985	6008	67906	56613
Mbuti	AHUR770c	SJArg-1	SouthernNorthAmerica_EH	USA_Nevada_SpiritCave_11000BP.SG	blueviolet	22	Cuyo_LH	Argentina_Callingasta_1500BP.SG	brown3	1	360015	796	45227	17399	NA	NA	NA	NA	392165	5751	68194	69080	395383	8313	47.56	21635
Mbuti	AHUR770c	I5456	SouthernNorthAmerica_EH	USA_Nevada_SpiritCave_11000BP.SG	blueviolet	22	CentralAmerica_MH	Belize_7400BP.Capt	mediumvioletred	24	362504	6329	57279	35633	NA	NA	NA	NA	NA	NA	NA	NA	NA	NA	NA	NA
Mbuti	AHUR770c	I1867	SouthernNorthAmerica_EH	USA_Nevada_SpiritCave_11000BP.SG	blueviolet	22	SouthernNorthAmerica_LH	Mexico_SanLorenzo_700BP.Capt	blueviolet	6	337434	11694	28857	7110	NA	NA	NA	NA	NA	NA	NA	NA	NA	NA	NA	NA
Mbuti	AHUR770c	I1357	SouthernNorthAmerica_EH	USA_Nevada_SpiritCave_11000BP.SG	blueviolet	22	CentralAndes_MiddleHorizon_LH	Peru_Laramate_900BP.Capt	orange2	8	370469	539	68733	55113	NA	NA	NA	NA	NA	NA	NA	NA	NA	NA	NA	NA
Mbuti	AHUR770c	I2539	SouthernNorthAmerica_EH	USA_Nevada_SpiritCave_11000BP.SG	blueviolet	22	CentralAndes_MiddleHorizon_LH	Chile_CaletaHuelen_MH_1100BP.Capt	orange2	5	372124	14423	2025-08-25	5278	NA	NA	NA	NA	NA	NA	NA	NA	NA	NA	NA	NA
Mbuti	AHUR770c	QKI-809	SouthernNorthAmerica_EH	USA_Nevada_SpiritCave_11000BP.SG	blueviolet	22	CentralAndes_LateHorizon_LH	Peru_Qotakalli1_LH.Capt	darkorange2	10	370415	4744	78.08	67789	NA	NA	NA	NA	NA	NA	NA	NA	NA	NA	NA	NA
Mbuti	AHUR770c	PS-07	SouthernNorthAmerica_EH	USA_Nevada_SpiritCave_11000BP.SG	blueviolet	22	California_SouthernMainland_LH	USA_CA_PointSal_1500BP.SG	palevioletred3	2	372326	7635	48769	19644	NA	NA	NA	NA	404488	5341	75739	75446	401532	7587	52923	23901
Mbuti	AHUR770c	I12942	SouthernNorthAmerica_EH	USA_Nevada_SpiritCave_11000BP.SG	blueviolet	22	SouthPatagonia_LH	Argentina_BeagleChannel_Yamana_100BP.Capt	blue1	1	369738	7311	50574	23449	NA	NA	NA	NA	NA	NA	NA	NA	NA	NA	NA	NA
Mbuti	AHUR770c	I1864	SouthernNorthAmerica_EH	USA_Nevada_SpiritCave_11000BP.SG	blueviolet	22	SouthernNorthAmerica_LH	Mexico_CoyoteCave_950BP.Capt	blueviolet	7	36121	5706	63308	38042	NA	NA	NA	NA	NA	NA	NA	NA	NA	NA	NA	NA
Mbuti	AHUR770c	I2243	SouthernNorthAmerica_EH	USA_Nevada_SpiritCave_11000BP.SG	blueviolet	22	CentralAndes_MiddleHorizonLateIntermeditae_LH	Peru_MH_LIP_Lambayeque.Capt	darkorange3	2	371611	12601	29491	6161	NA	NA	NA	NA	NA	NA	NA	NA	NA	NA	NA	NA
Mbuti	AHUR770c	I0750	SouthernNorthAmerica_EH	USA_Nevada_SpiritCave_11000BP.SG	blueviolet	22	California_SouthernChannelIslands_LH	USA_CA_SanClemente_500BP.Capt	violet	9	365557	5156	70.9	54220	NA	NA	NA	NA	NA	NA	NA	NA	NA	NA	NA	NA
Mbuti	AHUR770c	I0041	SouthernNorthAmerica_EH	USA_Nevada_SpiritCave_11000BP.SG	blueviolet	22	CentralAndes_EH	Peru_Lauricocha_8600BP.Capt	darkorange4	22	37362	5707	65467	45608	NA	NA	NA	NA	NA	NA	NA	NA	NA	NA	NA	NA
Mbuti	AHUR770c	QKI-4	SouthernNorthAmerica_EH	USA_Nevada_SpiritCave_11000BP.SG	blueviolet	22	CentralAndes_LateHorizon_LH	Peru_Qotakalli2_LH.Capt	darkorange2	11	364572	4887	74598	60788	NA	NA	NA	NA	NA	NA	NA	NA	NA	NA	NA	NA
Mbuti	AHUR770c	I2706	SouthernNorthAmerica_EH	USA_Nevada_SpiritCave_11000BP.SG	blueviolet	22	California_NorthernChannelIslands_LH	USA_CA_SantaRosa_300BP.Capt	violet	4	378933	7085	53485	24706	NA	NA	NA	NA	NA	NA	NA	NA	NA	NA	NA	NA
Mbuti	AHUR770c	I2557	SouthernNorthAmerica_EH	USA_Nevada_SpiritCave_11000BP.SG	blueviolet	22	CentralAndes_EarlyIntermediate_LH	Peru_Ullujaya_EIP_1350BP.Capt	darkorange1	5	36506	6377	57244	33482	NA	NA	NA	NA	NA	NA	NA	NA	NA	NA	NA	NA
Mbuti	AHUR770c	SHN-355	SouthernNorthAmerica_EH	USA_Nevada_SpiritCave_11000BP.SG	blueviolet	22	CentralAndes_LateHorizon_LH	Peru_Sacsahuaman2_LH.Capt	darkorange2	13	361271	5105	70773	61609	NA	NA	NA	NA	NA	NA	NA	NA	NA	NA	NA	NA
Mbuti	AHUR770c	PS-02	SouthernNorthAmerica_EH	USA_Nevada_SpiritCave_11000BP.SG	blueviolet	22	California_SouthernMainland_LH	USA_CA_PointSal_1500BP.SG	palevioletred3	2	NA	NA	NA	NA	NA	NA	NA	NA	395334	9705	40736	13774	NA	NA	NA	NA
Mbuti	AHUR770c	I15173	SouthernNorthAmerica_EH	USA_Nevada_SpiritCave_11000BP.SG	blueviolet	22	California_Central_LH	USA_CA_CalaverasCounty_600BP.Capt	palevioletred1	7	373101	5254	71013	55405	NA	NA	NA	NA	NA	NA	NA	NA	NA	NA	NA	NA
Mbuti	AHUR770c	I2708	SouthernNorthAmerica_EH	USA_Nevada_SpiritCave_11000BP.SG	blueviolet	22	California_NorthernChannelIslands_LH	USA_CA_SantaRosa_3000BP.Capt	violet	3	366735	9267	39572	14074	NA	NA	NA	NA	NA	NA	NA	NA	NA	NA	NA	NA
Mbuti	AHUR770c	B-03	SouthernNorthAmerica_EH	USA_Nevada_SpiritCave_11000BP.SG	blueviolet	22	California_Baja_LH	Mexico_Pericues_Unknown.SG	palevioletred1	4	355017	713	49794	22919	NA	NA	NA	NA	391861	5467	71671	93872	392918	768	51158	29933
Mbuti	AHUR770c	I11968	SouthernNorthAmerica_EH	USA_Nevada_SpiritCave_11000BP.SG	blueviolet	22	California_NorthernChannelIslands_LH	USA_CA_SantaRosa_3200BP.Capt	violet	5	367343	5646	65066	42269	NA	NA	NA	NA	NA	NA	NA	NA	NA	NA	NA	NA
Mbuti	AHUR770c	I11289	SouthernNorthAmerica_EH	USA_Nevada_SpiritCave_11000BP.SG	blueviolet	22	California_SouthernMainland_MH	USA_CA_Goleta_4700BP.Capt	palevioletred3	21	379447	7476	50754	21029	NA	NA	NA	NA	NA	NA	NA	NA	NA	NA	NA	NA
Mbuti	AHUR770c	SN-39	SouthernNorthAmerica_EH	USA_Nevada_SpiritCave_11000BP.SG	blueviolet	22	California_SouthernChannelIslands_MH	USA_CA_SanNicolas_4800BP.SG	violet	23	359097	8153	44045	17595	NA	NA	NA	NA	400049	6061	66008	70868	399384	8374	47694	22692
Mbuti	AHUR770c	I12364	SouthernNorthAmerica_EH	USA_Nevada_SpiritCave_11000BP.SG	blueviolet	22	SouthPatagonia_LH	Argentina_NorthTierradelFuego_Selknam_500BP.Capt	blue1	5	36456	8574	42518	15625	NA	NA	NA	NA	NA	NA	NA	NA	NA	NA	NA	NA
Mbuti	AHUR770c	I2545	SouthernNorthAmerica_EH	USA_Nevada_SpiritCave_11000BP.SG	blueviolet	22	CentralAndes_LateHorizon_LH	Peru_LH_Inca.Capt	darkorange2	1	372157	8706	42749	14892	NA	NA	NA	NA	NA	NA	NA	NA	NA	NA	NA	NA
Mbuti	AHUR770c	CCA-7-2	SouthernNorthAmerica_EH	USA_Nevada_SpiritCave_11000BP.SG	blueviolet	22	CentralAndes_LateHorizon_LH	Peru_CasaConcha2_LH.Capt	darkorange2	4	36821	5016	73403	73919	NA	NA	NA	NA	NA	NA	NA	NA	NA	NA	NA	NA
Mbuti	AHUR770c	Lovelock4	SouthernNorthAmerica_EH	USA_Nevada_SpiritCave_11000BP.SG	blueviolet	22	SouthernNorthAmerica_LH	USA_Nevada_LovelockCave_1850BP.SG	blueviolet	1	359913	5889	61114	39235	NA	NA	NA	NA	39377	4912	80.17	165169	39677	6215	63841	52825
Mbuti	AHUR770c	E8CdV	SouthernNorthAmerica_EH	USA_Nevada_SpiritCave_11000BP.SG	blueviolet	22	CentralAmerica_LH	Mexico_CanadaDeLaVirgen_MidClassic.SG	darkviolet	2	357945	686	52176	24964	NA	NA	NA	NA	385179	5132	75051	119541	388299	6676	58166	37489
Mbuti	AHUR770c	SN-03	SouthernNorthAmerica_EH	USA_Nevada_SpiritCave_11000BP.SG	blueviolet	22	California_SouthernChannelIslands_LH	USA_CA_SanNicolas_1600BP.SG	violet	8	369769	7715	47926	20691	NA	NA	NA	NA	396736	562	70589	86321	40064	7464	53674	28089
Mbuti	AHUR770c	AR0526	SouthernNorthAmerica_EH	USA_Nevada_SpiritCave_11000BP.SG	blueviolet	22	Uspallata	LH-MF|LH-F	goldenrod1	21	367069	4763	77068	77277	NA	NA	NA	NA	398112	4622	86141	323323	399501	548	72902	103309
Mbuti	AHUR770c	I1742	SouthernNorthAmerica_EH	USA_Nevada_SpiritCave_11000BP.SG	blueviolet	22	CentralAndes_MiddleHorizon_LH	Peru_Laramate_900BP.Capt	orange2	8	371192	615	60355	36587	NA	NA	NA	NA	NA	NA	NA	NA	NA	NA	NA	NA
Mbuti	AHUR770c	I0758	SouthernNorthAmerica_EH	USA_Nevada_SpiritCave_11000BP.SG	blueviolet	22	California_SouthernChannelIslands_LH	USA_CA_SanClemente_500BP.Capt	violet	9	355521	5023	70784	59030	NA	NA	NA	NA	NA	NA	NA	NA	NA	NA	NA	NA
Mbuti	AHUR770c	I2238	SouthernNorthAmerica_EH	USA_Nevada_SpiritCave_11000BP.SG	blueviolet	22	CentralAndes_EarlyIntermediate_LH	Peru_EIP_Moche.Capt	darkorange1	6	371933	10861	34244	9293	NA	NA	NA	NA	NA	NA	NA	NA	NA	NA	NA	NA
Mbuti	AHUR770c	KCA-1108	SouthernNorthAmerica_EH	USA_Nevada_SpiritCave_11000BP.SG	blueviolet	22	CentralAndes_LateHorizon_LH	Peru_Kusicancha1_LH.Capt	darkorange2	8	359906	5098	70593	65109	NA	NA	NA	NA	NA	NA	NA	NA	NA	NA	NA	NA
Mbuti	AHUR770c	I15175	SouthernNorthAmerica_EH	USA_Nevada_SpiritCave_11000BP.SG	blueviolet	22	California_Central_LH	USA_CA_CalaverasCounty_600BP.Capt	palevioletred1	7	370212	5126	72225	61941	NA	NA	NA	NA	NA	NA	NA	NA	NA	NA	NA	NA
Mbuti	AHUR770c	OTT-1165	SouthernNorthAmerica_EH	USA_Nevada_SpiritCave_11000BP.SG	blueviolet	22	CentralAndes_LateIntermediate_LH	Peru_Ollantaytambo_LIP.Capt	orange1	13	369951	558	66294	46694	NA	NA	NA	NA	NA	NA	NA	NA	NA	NA	NA	NA
Mbuti	AHUR770c	AR0501	SouthernNorthAmerica_EH	USA_Nevada_SpiritCave_11000BP.SG	blueviolet	22	Uspallata	LH-MF|LH-F	goldenrod1	21	363111	678	53557	25964	NA	NA	NA	NA	394223	5508	71573	106737	398233	741	53741	34112
Mbuti	AHUR770c	OTT-1160	SouthernNorthAmerica_EH	USA_Nevada_SpiritCave_11000BP.SG	blueviolet	22	CentralAndes_LateIntermediate_LH	Peru_Ollantaytambo_LIP.Capt	orange1	13	364995	4893	74592	65399	NA	NA	NA	NA	NA	NA	NA	NA	NA	NA	NA	NA
Mbuti	AHUR770c	SN_50	SouthernNorthAmerica_EH	USA_Nevada_SpiritCave_11000BP.SG	blueviolet	22	California_SouthernChannelIslands_LH	USA_CA_SanNicolas_1600BP.SG	violet	8	359577	6201	57983	35440	NA	NA	NA	NA	398383	5092	78241	143159	402842	642	62744	45490
Mbuti	AHUR770c	AR0514	SouthernNorthAmerica_EH	USA_Nevada_SpiritCave_11000BP.SG	blueviolet	22	Uspallata	LH-MF|LH-F	goldenrod1	21	36217	5188	69814	52878	NA	NA	NA	NA	392825	4691	83742	219181	39816	5722	69587	70173
Mbuti	AHUR770c	SN-53	SouthernNorthAmerica_EH	USA_Nevada_SpiritCave_11000BP.SG	blueviolet	22	California_SouthernChannelIslands_LH	USA_CA_SanNicolas_1600BP.SG	violet	8	362687	702	51664	23405	NA	NA	NA	NA	397344	5544	71.67	91911	398017	7694	51.73	28815
Mbuti	AHUR770c	AR0521	SouthernNorthAmerica_EH	USA_Nevada_SpiritCave_11000BP.SG	blueviolet	22	Uspallata	LH-MF|LH-F	goldenrod1	21	364264	4985	73069	63725	NA	NA	NA	NA	3914	4727	82798	261952	399297	5761	69306	83267
Mbuti	AHUR770c	I14826	SouthernNorthAmerica_EH	USA_Nevada_SpiritCave_11000BP.SG	blueviolet	22	California_SouthernMainland_LH	USA_CA_Malibu_3400BP.Capt	palevioletred3	3	371565	8449	43979	15635	NA	NA	NA	NA	NA	NA	NA	NA	NA	NA	NA	NA
Mbuti	AHUR770c	SN-38	SouthernNorthAmerica_EH	USA_Nevada_SpiritCave_11000BP.SG	blueviolet	22	California_SouthernChannelIslands_LH	USA_CA_SanNicolas_1600BP.SG	violet	8	362341	11908	30428	7259	NA	NA	NA	NA	396446	7253	54658	29423	416047	11624	35792	9236
Mbuti	AHUR770c	SHN-212	SouthernNorthAmerica_EH	USA_Nevada_SpiritCave_11000BP.SG	blueviolet	22	CentralAndes_LateHorizon_LH	Peru_Sacsahuaman1_LH.Capt	darkorange2	12	362597	1052	34467	9748	NA	NA	NA	NA	NA	NA	NA	NA	NA	NA	NA	NA
Mbuti	AHUR770c	SHN-902	SouthernNorthAmerica_EH	USA_Nevada_SpiritCave_11000BP.SG	blueviolet	22	CentralAndes_LateHorizon_LH	Peru_Sacsahuaman2_LH.Capt	darkorange2	13	359262	712	50462	25172	NA	NA	NA	NA	NA	NA	NA	NA	NA	NA	NA	NA
Mbuti	AHUR770c	I1485	SouthernNorthAmerica_EH	USA_Nevada_SpiritCave_11000BP.SG	blueviolet	22	CentralAndes_MiddleHorizon_LH	Peru_Laramate_900BP.Capt	orange2	8	36875	5458	67561	56522	NA	NA	NA	NA	NA	NA	NA	NA	NA	NA	NA	NA
Mbuti	AHUR770c	I2710	SouthernNorthAmerica_EH	USA_Nevada_SpiritCave_11000BP.SG	blueviolet	22	California_NorthernChannelIslands_MH	USA_CA_SantaRosa_7400BP.Capt	violet	21	365913	765	47832	22443	NA	NA	NA	NA	NA	NA	NA	NA	NA	NA	NA	NA
Mbuti	AHUR770c	PS-18	SouthernNorthAmerica_EH	USA_Nevada_SpiritCave_11000BP.SG	blueviolet	22	California_SouthernMainland_LH	USA_CA_PointSal_1500BP.SG	palevioletred3	2	38612	12687	30433	7232	NA	NA	NA	NA	40548	754	53774	30541	409282	11415	35854	9662
Mbuti	AHUR770c	I0965	SouthernNorthAmerica_EH	USA_Nevada_SpiritCave_11000BP.SG	blueviolet	22	CentralAndes_LateIntermediate_LH	Peru_Lima_LIP_650BP.Capt	orange1	6	390867	9286	42.09	12971	NA	NA	NA	NA	NA	NA	NA	NA	NA	NA	NA	NA
Mbuti	AHUR770c	I2703	SouthernNorthAmerica_EH	USA_Nevada_SpiritCave_11000BP.SG	blueviolet	22	California_NorthernChannelIslands_LH	USA_CA_SantaRosa_300BP.Capt	violet	4	372412	505	73743	64544	NA	NA	NA	NA	NA	NA	NA	NA	NA	NA	NA	NA
Mbuti	AHUR770c	QKI-21-1	SouthernNorthAmerica_EH	USA_Nevada_SpiritCave_11000BP.SG	blueviolet	22	CentralAndes_LateHorizon_LH	Peru_Qotakalli1_LH.Capt	darkorange2	10	353796	8857	39947	14377	NA	NA	NA	NA	NA	NA	NA	NA	NA	NA	NA	NA
Mbuti	AHUR770c	I0040	SouthernNorthAmerica_EH	USA_Nevada_SpiritCave_11000BP.SG	blueviolet	22	CentralAndes_MH	Peru_Lauricocha_5800BP.Capt	orange4	24	356024	5129	69411	52675	NA	NA	NA	NA	NA	NA	NA	NA	NA	NA	NA	NA
Mbuti	AHUR770c	I12357	SouthernNorthAmerica_EH	USA_Nevada_SpiritCave_11000BP.SG	blueviolet	22	SouthPatagonia_LH	Argentina_MitrePeninsula_Haush_400BP.Capt	blue1	3	364792	5794	62958	45153	NA	NA	NA	NA	NA	NA	NA	NA	NA	NA	NA	NA
Mbuti	AHUR770c	I2263	SouthernNorthAmerica_EH	USA_Nevada_SpiritCave_11000BP.SG	blueviolet	22	CentralAndes_EarlyIntermediate_LH	Peru_ElBrujo_EIP_1300BP.Capt	darkorange1	1	364002	612	59.48	35304	NA	NA	NA	NA	NA	NA	NA	NA	NA	NA	NA	NA
Mbuti	AHUR770c	I12363	SouthernNorthAmerica_EH	USA_Nevada_SpiritCave_11000BP.SG	blueviolet	22	SouthPatagonia_LH	Argentina_NorthTierradelFuego_Selknam_500BP.Capt	blue1	5	362768	5426	66862	52944	NA	NA	NA	NA	NA	NA	NA	NA	NA	NA	NA	NA
Mbuti	AHUR770c	I2544	SouthernNorthAmerica_EH	USA_Nevada_SpiritCave_11000BP.SG	blueviolet	22	CentralAndes_LateIntermediate_LH	Peru_Chanka_LIP.Capt	orange1	4	364204	4851	75083	68157	NA	NA	NA	NA	NA	NA	NA	NA	NA	NA	NA	NA
Mbuti	AHUR770c	I2262	SouthernNorthAmerica_EH	USA_Nevada_SpiritCave_11000BP.SG	blueviolet	22	CentralAndes_EarlyIntermediate_LH	Peru_EIP_Moche.Capt	darkorange1	6	360875	11157	32345	8320	NA	NA	NA	NA	NA	NA	NA	NA	NA	NA	NA	NA
Mbuti	AHUR770c	I12361	SouthernNorthAmerica_EH	USA_Nevada_SpiritCave_11000BP.SG	blueviolet	22	SouthPatagonia_LH	Argentina_MitrePeninsula_Haush_400BP.Capt	blue1	3	356707	10002	35664	9926	NA	NA	NA	NA	NA	NA	NA	NA	NA	NA	NA	NA
Mbuti	AHUR770c	F9	SouthernNorthAmerica_EH	USA_Nevada_SpiritCave_11000BP.SG	blueviolet	22	SouthernNorthAmerica_LH	Mexico_SierraTarahumara_PostClassic.SG	blueviolet	3	364114	4948	73592	61820	NA	NA	NA	NA	388361	4534	85655	266752	392476	5619	69847	84809
Mbuti	AHUR770c	I0038	SouthernNorthAmerica_EH	USA_Nevada_SpiritCave_11000BP.SG	blueviolet	22	CentralAndes_EH	Peru_Lauricocha_8600BP.Capt	darkorange4	22	362527	482	75212	80527	NA	NA	NA	NA	NA	NA	NA	NA	NA	NA	NA	NA
Mbuti	AHUR770c	I1863	SouthernNorthAmerica_EH	USA_Nevada_SpiritCave_11000BP.SG	blueviolet	22	SouthernNorthAmerica_LH	Mexico_CoyoteCave_2750BP.Capt	blueviolet	8	3315	13652	24282	5485	NA	NA	NA	NA	NA	NA	NA	NA	NA	NA	NA	NA
Mbuti	AHUR770c	SC-04	SouthernNorthAmerica_EH	USA_Nevada_SpiritCave_11000BP.SG	blueviolet	22	California_SouthernChannelIslands_LH	USA_CA_SanClemente_900BP.SG	violet	7	368183	8181	45006	18246	NA	NA	NA	NA	40432	5697	70975	76103	418894	7861	53.29	24675
Mbuti	AHUR770c	Lapa15	SouthernNorthAmerica_EH	USA_Nevada_SpiritCave_11000BP.SG	blueviolet	22	Brazil_EH	Brazil_LapaDoSanto_9600BP.Capt	palegreen1	21	357761	5395	66316	48723	NA	NA	NA	NA	NA	NA	NA	NA	NA	NA	NA	NA
Mbuti	AHUR770c	I0748	SouthernNorthAmerica_EH	USA_Nevada_SpiritCave_11000BP.SG	blueviolet	22	California_SouthernChannelIslands_LH	USA_CA_SanClemente_500BP.Capt	violet	9	361045	4894	73779	73359	NA	NA	NA	NA	NA	NA	NA	NA	NA	NA	NA	NA
Mbuti	AHUR770c	I2241	SouthernNorthAmerica_EH	USA_Nevada_SpiritCave_11000BP.SG	blueviolet	22	CentralAndes_MiddleHorizonLateIntermeditae_LH	Peru_MH_LIP_Lambayeque.Capt	darkorange3	2	36395	4861	74868	65056	NA	NA	NA	NA	NA	NA	NA	NA	NA	NA	NA	NA
Mbuti	AHUR770c	SM-02	SouthernNorthAmerica_EH	USA_Nevada_SpiritCave_11000BP.SG	blueviolet	22	California_NorthernChannelIslands_LH	USA_CA_SanMiguel_650BP.SG	violet	1	371399	4822	77024	81494	NA	NA	NA	NA	406397	4774	85129	339518	410183	5566	73697	108252
Mbuti	AHUR770c	I8348	SouthernNorthAmerica_EH	USA_Nevada_SpiritCave_11000BP.SG	blueviolet	22	Pampa_MH	Argentina_LagunaChica_6800BP.Capt	lightblue	23	357124	9048	39471	13533	NA	NA	NA	NA	NA	NA	NA	NA	NA	NA	NA	NA
Mbuti	AHUR770c	I2709	SouthernNorthAmerica_EH	USA_Nevada_SpiritCave_11000BP.SG	blueviolet	22	California_NorthernChannelIslands_MH	USA_CA_SantaRosa_4900BP.Capt	violet	22	366783	6897	53181	25436	NA	NA	NA	NA	NA	NA	NA	NA	NA	NA	NA	NA
Mbuti	AHUR770c	Yaghan894	SouthernNorthAmerica_EH	USA_Nevada_SpiritCave_11000BP.SG	blueviolet	22	SouthPatagonia_LH	Argentina_BeagleChannel_Yamana_100BP.SG	blue1	1	35821	5672	63149	43280	NA	NA	NA	NA	391278	4803	81.47	172276	390298	6154	63423	52241
Mbuti	AHUR770c	SN-01	SouthernNorthAmerica_EH	USA_Nevada_SpiritCave_11000BP.SG	blueviolet	22	California_SouthernChannelIslands_LH	USA_CA_SanNicolas_1600BP.SG	violet	8	357168	10915	32724	8615	NA	NA	NA	NA	385652	6763	57021	34472	388621	10376	37455	11105
Mbuti	AHUR770c	I12941	SouthernNorthAmerica_EH	USA_Nevada_SpiritCave_11000BP.SG	blueviolet	22	SouthPatagonia_LH	Argentina_BeagleChannel_Yamana_100BP.Capt	blue1	1	373511	4976	75063	68941	NA	NA	NA	NA	NA	NA	NA	NA	NA	NA	NA	NA
Mbuti	AHUR770c	SN-15	SouthernNorthAmerica_EH	USA_Nevada_SpiritCave_11000BP.SG	blueviolet	22	California_SouthernChannelIslands_LH	USA_CA_SanNicolas_1600BP.SG	violet	8	362978	8206	44231	16996	NA	NA	NA	NA	390374	5844	66799	72215	390079	7842	49744	23323
Mbuti	AHUR770c	I2264	SouthernNorthAmerica_EH	USA_Nevada_SpiritCave_11000BP.SG	blueviolet	22	CentralAndes_LateIntermediate_LH	Peru_Highlands_LIP_Chimu.Capt	orange1	5	362971	5001	72586	57913	NA	NA	NA	NA	NA	NA	NA	NA	NA	NA	NA	NA
Mbuti	AHUR770c	I8349	SouthernNorthAmerica_EH	USA_Nevada_SpiritCave_11000BP.SG	blueviolet	22	Pampa_MH	Argentina_LagunaChica_6800BP.Capt	lightblue	23	364905	6717	54327	29060	NA	NA	NA	NA	NA	NA	NA	NA	NA	NA	NA	NA
Mbuti	AHUR770c	AR0520	SouthernNorthAmerica_EH	USA_Nevada_SpiritCave_11000BP.SG	blueviolet	22	Uspallata	LH-LFplc|LH-F	darkorange	22	365554	7596	48122	23926	NA	NA	NA	NA	390415	5407	72203	102157	390268	7092	55031	32886
Mbuti	AHUR770c	SN-25	SouthernNorthAmerica_EH	USA_Nevada_SpiritCave_11000BP.SG	blueviolet	22	California_SouthernChannelIslands_MH	USA_CA_SanNicolas_4800BP.SG	violet	23	365413	13463	27142	5394	NA	NA	NA	NA	39981	8552	46753	22053	398719	13744	29011	7198
Mbuti	AHUR770c	2417J	SouthernNorthAmerica_EH	USA_Nevada_SpiritCave_11000BP.SG	blueviolet	22	CentralAmerica_LH	Mexico_SierraGorda_Postclassic.SG	darkviolet	3	363745	4855	74923	68691	NA	NA	NA	NA	391691	4282	91.47	293045	394309	5063	77873	93616
Mbuti	AHUR770c	I12366	SouthernNorthAmerica_EH	USA_Nevada_SpiritCave_11000BP.SG	blueviolet	22	SouthPatagonia_LH	Argentina_NorthTierradelFuego_Selknam_500BP.Capt	blue1	5	365221	5618	65003	44225	NA	NA	NA	NA	NA	NA	NA	NA	NA	NA	NA	NA
Mbuti	AHUR770c	Cuncaicha15-04	SouthernNorthAmerica_EH	USA_Nevada_SpiritCave_11000BP.SG	blueviolet	22	CentralAndes_MH	Peru_Cuncaicha_3300BP_contam.Capt	orange4	25	360648	5087	70894	66063	NA	NA	NA	NA	NA	NA	NA	NA	NA	NA	NA	NA
Mbuti	AHUR770c	AR0510	SouthernNorthAmerica_EH	USA_Nevada_SpiritCave_11000BP.SG	blueviolet	22	Uspallata	LH-MF|LH-F	goldenrod1	21	362101	4688	77239	85896	NA	NA	NA	NA	385366	4763	80911	367641	387713	5415	71599	118084
Mbuti	AHUR770c	I0309	SouthernNorthAmerica_EH	USA_Nevada_SpiritCave_11000BP.SG	blueviolet	22	Pampa_MH	Argentina_ArroyoSeco2_7700BP.Capt	lightblue	22	369108	577	63965	43985	NA	NA	NA	NA	NA	NA	NA	NA	NA	NA	NA	NA
Mbuti	Ala1	AR0509	California_Central_LH	USA_CA_SanFranciscoBay_300BP.SG	palevioletred1	5	Uspallata	LH-MF|LH-F	goldenrod1	21	364817	3917	93135	212314	377215	6034	62513	42344	390868	4316	90555	954116	392938	4638	84726	307322
Mbuti	Ala1	AR0528	California_Central_LH	USA_CA_SanFranciscoBay_300BP.SG	palevioletred1	5	Uspallata	LH-MF|LH-F	goldenrod1	21	365716	4123	88704	150188	373044	6637	56206	29874	391391	4217	92805	655300	392325	4647	84426	208854
Mbuti	Ala1	E8CdV	California_Central_LH	USA_CA_SanFranciscoBay_300BP.SG	palevioletred1	5	CentralAmerica_LH	Mexico_CanadaDeLaVirgen_MidClassic.SG	darkviolet	2	359022	493	72829	68778	367341	9612	38218	13512	386296	432	89418	349035	386977	5124	75517	110009
Mbuti	Ala1	SN-20	California_Central_LH	USA_CA_SanFranciscoBay_300BP.SG	palevioletred1	5	California_SouthernChannelIslands_MH	USA_CA_SanNicolas_4800BP.SG	violet	23	359722	9066	39677	13008	NA	NA	NA	NA	397378	6095	65201	53816	416302	9078	45859	17269
Mbuti	Ala1	2417Q	California_Central_LH	USA_CA_SanFranciscoBay_300BP.SG	palevioletred1	5	CentralAmerica_LH	Mexico_SierraGorda_Terminalclassic.SG	darkviolet	4	368933	3792	97305	267773	376501	5851	64348	53681	393185	4282	91816	1251902	392648	4637	84673	403794
Mbuti	Ala1	AR0512	California_Central_LH	USA_CA_SanFranciscoBay_300BP.SG	palevioletred1	5	Uspallata	LH-MF|LH-F	goldenrod1	21	368236	3762	97872	269139	374781	5608	66833	53820	394235	4234	93115	1230500	396428	4582	86526	396892
Mbuti	Ala1	AR0520	California_Central_LH	USA_CA_SanFranciscoBay_300BP.SG	palevioletred1	5	Uspallata	LH-LFplc|LH-F	darkorange	22	369509	5139	71906	67313	378949	8976	42.22	13566	386943	445	86944	304905	389122	5143	75662	99265
Mbuti	Ala1	SN-17	California_Central_LH	USA_CA_SanFranciscoBay_300BP.SG	palevioletred1	5	California_SouthernChannelIslands_MH	USA_CA_SanNicolas_4800BP.SG	violet	23	366914	3907	93904	241759	374834	5603	66899	48486	390823	4218	92659	1097087	393153	4553	86354	357216
Mbuti	Ala1	AR0149	California_Central_LH	USA_CA_SanFranciscoBay_300BP.SG	palevioletred1	5	Uspallata	LH-HG|LH-HG	darkorange4	23	361775	5022	72036	54676	NA	NA	NA	NA	386715	4778	80943	260806	386889	5598	69107	84540
Mbuti	Ala1	AR0517	California_Central_LH	USA_CA_SanFranciscoBay_300BP.SG	palevioletred1	5	Uspallata	LH-MFout|LH-F	goldenrod1	23	366149	4672	78373	84495	388393	8456	45929	16800	38983	4277	91151	364688	393035	5049	77.84	117273
Mbuti	Ala1	NC	California_Central_LH	USA_CA_SanFranciscoBay_300BP.SG	palevioletred1	5	California_SouthernMainland_LH	USA_CA_NewCuyama_1300BP.SG	palevioletred3	1	371106	4443	83518	103323	372834	7496	49.74	20568	396717	4142	95778	431198	401926	4889	82207	137015
Mbuti	Ala1	AR0519	California_Central_LH	USA_CA_SanFranciscoBay_300BP.SG	palevioletred1	5	Uspallata	LH-MF|LH-F	goldenrod1	21	369102	3879	95158	244168	379071	5576	67981	48844	393545	4354	90.39	1107637	395388	4616	85653	357526
Mbuti	Ala1	AR0162	California_Central_LH	USA_CA_SanFranciscoBay_300BP.SG	palevioletred1	5	Uspallata	LH-LF|LH-F	darkorange4	21	368094	417	88263	176768	374504	6528	57371	35494	395718	4506	87815	769941	398096	4867	81787	248604
Mbuti	Ala1	PS-07	California_Central_LH	USA_CA_SanFranciscoBay_300BP.SG	palevioletred1	5	California_SouthernMainland_LH	USA_CA_PointSal_1500BP.SG	palevioletred3	2	366227	5492	66678	52897	NA	NA	NA	NA	394427	4592	85892	208809	397035	5639	70409	65731
Mbuti	Ala1	SN-25	California_Central_LH	USA_CA_SanFranciscoBay_300BP.SG	palevioletred1	5	California_SouthernChannelIslands_MH	USA_CA_SanNicolas_4800BP.SG	violet	23	377155	8368	45.07	14782	NA	NA	NA	NA	400779	6085	65867	66582	415065	8443	49.16	21727
Mbuti	Ala1	SM-02	California_Central_LH	USA_CA_SanFranciscoBay_300BP.SG	palevioletred1	5	California_NorthernChannelIslands_LH	USA_CA_SanMiguel_650BP.SG	violet	1	375578	3893	96.47	226917	3802	6097	62357	45017	402436	4347	92.57	994933	404125	4661	86704	319094
Mbuti	Ala1	PS-02	California_Central_LH	USA_CA_SanFranciscoBay_300BP.SG	palevioletred1	5	California_SouthernMainland_LH	USA_CA_PointSal_1500BP.SG	palevioletred3	2	NA	NA	NA	NA	NA	NA	NA	NA	396053	6453	61379	39719	NA	NA	NA	NA
Mbuti	Ala1	AR0151	California_Central_LH	USA_CA_SanFranciscoBay_300BP.SG	palevioletred1	5	Uspallata	LH-HG|LH-HG	darkorange4	23	365729	4604	79438	92109	364771	76	47996	18774	38877	4367	89018	444871	385995	4948	78014	145979
Mbuti	Ala1	CR-01	California_Central_LH	USA_CA_SanFranciscoBay_300BP.SG	palevioletred1	5	California_NorthernChannelIslands_LH	USA_CA_SantaCruz_1000BP.SG	violet	2	368589	3863	95417	258628	376889	5765	65377	51779	393643	436	90283	1174665	396385	4676	84772	380719
Mbuti	Ala1	SN_50	California_Central_LH	USA_CA_SanFranciscoBay_300BP.SG	palevioletred1	5	California_SouthernChannelIslands_LH	USA_CA_SanNicolas_1600BP.SG	violet	8	368298	4578	80.45	97213	379853	7958	47733	19249	394185	4443	88728	412809	398233	5009	79497	131699
Mbuti	Ala1	AR0518	California_Central_LH	USA_CA_SanFranciscoBay_300BP.SG	palevioletred1	5	Uspallata	LH-MF|LH-F	goldenrod1	21	369085	3982	92691	246762	379596	5906	64273	49520	392882	438	89701	1128132	393278	4643	84697	364623
Mbuti	Ala1	AR0500and513	California_Central_LH	USA_CA_SanFranciscoBay_300BP.SG	palevioletred1	5	Uspallata	LH-MF|LH-F	goldenrod1	21	36744	4228	86903	123861	372976	711	52457	24617	393217	4382	89729	546546	39598	474	83536	175477
Mbuti	Ala1	333B	California_Central_LH	USA_CA_SanFranciscoBay_300BP.SG	palevioletred1	5	CentralAmerica_LH	Mexico_SierraGorda_Postclassic.SG	darkviolet	3	369278	3776	97802	225248	379717	5794	65538	44847	391671	42	93266	1028959	394255	4436	88883	330154
Mbuti	Ala1	PS-17	California_Central_LH	USA_CA_SanFranciscoBay_300BP.SG	palevioletred1	5	California_SouthernMainland_LH	USA_CA_PointSal_1500BP.SG	palevioletred3	2	NA	NA	NA	NA	NA	NA	NA	NA	391451	6413	61.04	49786	381814	8893	42933	16100
Mbuti	Ala1	CT-01	California_Central_LH	USA_CA_SanFranciscoBay_300BP.SG	palevioletred1	5	California_SouthernChannelIslands_LH	USA_CA_SanCatalina_400BP.SG	violet	6	366674	3781	96984	252483	371737	5744	64713	50590	391248	4195	93268	1119016	39342	4454	88324	360021
Mbuti	Ala1	SN-16	California_Central_LH	USA_CA_SanFranciscoBay_300BP.SG	palevioletred1	5	California_SouthernChannelIslands_LH	USA_CA_SanNicolas_1600BP.SG	violet	8	355973	619	57509	28985	NA	NA	NA	NA	389198	4661	83498	120474	394888	6309	62593	38020
Mbuti	Ala1	B-04	California_Central_LH	USA_CA_SanFranciscoBay_300BP.SG	palevioletred1	5	California_Baja_LH	Mexico_Baja_Comondu_Unknown.SG	palevioletred1	1	355758	8792	40465	14615	NA	NA	NA	NA	388426	6025	64464	63037	38555	8124	47457	20273
Mbuti	Ala1	SN-52	California_Central_LH	USA_CA_SanFranciscoBay_300BP.SG	palevioletred1	5	California_SouthernChannelIslands_LH	USA_CA_SanNicolas_1600BP.SG	violet	8	361906	5495	65861	45874	NA	NA	NA	NA	387773	4577	84719	187023	392826	5949	66029	59012
Mbuti	Ala1	PS-06	California_Central_LH	USA_CA_SanFranciscoBay_300BP.SG	palevioletred1	5	California_SouthernMainland_LH	USA_CA_PointSal_1500BP.SG	palevioletred3	2	364283	3996	91161	183629	37586	6533	57531	36417	390826	4205	92939	785230	393708	4569	86173	251689
Mbuti	Ala1	AR0506	California_Central_LH	USA_CA_SanFranciscoBay_300BP.SG	palevioletred1	5	Uspallata	LH-MF|LH-F	goldenrod1	21	366084	4247	86.2	135863	381512	7373	51747	26859	392335	4198	93453	584563	394664	4583	86123	186232
Mbuti	Ala1	SM-01	California_Central_LH	USA_CA_SanFranciscoBay_300BP.SG	palevioletred1	5	California_NorthernChannelIslands_LH	USA_CA_SanMiguel_650BP.SG	violet	1	367543	7122	51605	24670	NA	NA	NA	NA	397734	5281	75316	102551	407245	7102	57341	32535
Mbuti	Ala1	SN-10	California_Central_LH	USA_CA_SanFranciscoBay_300BP.SG	palevioletred1	5	California_SouthernChannelIslands_LH	USA_CA_SanNicolas_1600BP.SG	violet	8	362552	5173	70084	60369	NA	NA	NA	NA	384912	4544	84702	250520	388524	5456	71.21	79606
Mbuti	Ala1	2417J	California_Central_LH	USA_CA_SanFranciscoBay_300BP.SG	palevioletred1	5	CentralAmerica_LH	Mexico_SierraGorda_Postclassic.SG	darkviolet	3	368251	3948	93287	192531	378205	6281	60212	38367	388874	4159	93494	870382	392192	4471	87723	279422
Mbuti	Ala1	AR0526	California_Central_LH	USA_CA_SanFranciscoBay_300BP.SG	palevioletred1	5	Uspallata	LH-MF|LH-F	goldenrod1	21	366996	3904	94002	214980	378135	6025	62757	42807	393794	4445	88583	954991	394975	4633	85249	307731
Mbuti	Ala1	AR0527	California_Central_LH	USA_CA_SanFranciscoBay_300BP.SG	palevioletred1	5	Uspallata	LH-MF|LH-F	goldenrod1	21	363222	4259	85286	158963	370848	6754	54905	31387	388564	4306	90242	685013	392535	4697	83574	218970
Mbuti	Ala1	PS-09	California_Central_LH	USA_CA_SanFranciscoBay_300BP.SG	palevioletred1	5	California_SouthernMainland_LH	USA_CA_PointSal_1500BP.SG	palevioletred3	2	377412	7216	52.3	21369	NA	NA	NA	NA	402572	5477	73501	90298	400636	7297	54901	28957
Mbuti	Ala1	PS-18	California_Central_LH	USA_CA_SanFranciscoBay_300BP.SG	palevioletred1	5	California_SouthernMainland_LH	USA_CA_PointSal_1500BP.SG	palevioletred3	2	366863	7838	46804	19585	NA	NA	NA	NA	394321	524	75249	87104	394106	6928	56886	27878
Mbuti	Ala1	SC-03	California_Central_LH	USA_CA_SanFranciscoBay_300BP.SG	palevioletred1	5	California_SouthernChannelIslands_LH	USA_CA_SanClemente_900BP.SG	violet	7	360501	4547	79.29	100499	369239	7939	46512	19828	391044	4599	85022	420400	391843	5427	72196	132954
Mbuti	Ala1	MX-01	California_Central_LH	USA_CA_SanFranciscoBay_300BP.SG	palevioletred1	5	California_Baja_LH	Mexico_Baja_IronSprings_Unknown.SG	palevioletred1	2	371441	7033	52811	23772	NA	NA	NA	NA	394466	515	76592	105806	401527	6766	59349	34467
Mbuti	Ala1	AR0501	California_Central_LH	USA_CA_SanFranciscoBay_300BP.SG	palevioletred1	5	Uspallata	LH-MF|LH-F	goldenrod1	21	367309	4964	73.99	71541	38713	9197	42093	14025	396828	4478	88615	309367	399355	5248	76091	98574
Mbuti	Ala1	AR0180	California_Central_LH	USA_CA_SanFranciscoBay_300BP.SG	palevioletred1	5	Uspallata	LH-LF|LH-F	darkorange4	22	36552	6838	53455	26668	NA	NA	NA	NA	395092	5484	72043	125916	391142	6865	56978	41324
Mbuti	Ala1	SN-13	California_Central_LH	USA_CA_SanFranciscoBay_300BP.SG	palevioletred1	5	California_SouthernChannelIslands_LH	USA_CA_SanNicolas_1600BP.SG	violet	8	363049	4164	87195	122307	368189	7208	51079	24057	387376	413	93787	525556	393297	4756	82694	168465
Mbuti	Ala1	B-03	California_Central_LH	USA_CA_SanFranciscoBay_300BP.SG	palevioletred1	5	California_Baja_LH	Mexico_Pericues_Unknown.SG	palevioletred1	4	363934	4855	74957	63578	366074	9032	40532	12718	387834	4318	89.82	273442	390578	5181	75392	87997
Mbuti	Ala1	SC-04	California_Central_LH	USA_CA_SanFranciscoBay_300BP.SG	palevioletred1	5	California_SouthernChannelIslands_LH	USA_CA_SanClemente_900BP.SG	violet	7	368433	5405	68171	49691	NA	NA	NA	NA	391377	4674	83727	218708	398305	5637	70655	71664
Mbuti	Ala1	AR0505	California_Central_LH	USA_CA_SanFranciscoBay_300BP.SG	palevioletred1	5	Uspallata	LH-MF|LH-F	goldenrod1	21	363648	3826	95058	260966	373901	5649	66188	51956	389046	4334	89764	1162287	39212	4647	84383	371902
Mbuti	Ala1	AR0152	California_Central_LH	USA_CA_SanFranciscoBay_300BP.SG	palevioletred1	5	Uspallata	LH-HG|LH-HG	darkorange4	23	369847	6039	61241	35520	NA	NA	NA	NA	395407	4814	82134	172623	398587	6231	63969	56619
Mbuti	Ala1	SN-32	California_Central_LH	USA_CA_SanFranciscoBay_300BP.SG	palevioletred1	5	California_SouthernChannelIslands_MH	USA_CA_SanNicolas_4800BP.SG	violet	23	361222	6805	53085	25539	NA	NA	NA	NA	390183	5316	73402	110222	400443	7157	55949	35552
Mbuti	Ala1	SC-05	California_Central_LH	USA_CA_SanFranciscoBay_300BP.SG	palevioletred1	5	California_SouthernChannelIslands_LH	USA_CA_SanClemente_900BP.SG	violet	7	365275	3883	94081	264421	372371	5733	64948	52778	389299	4165	93461	1180816	39313	4436	88614	378893
Mbuti	Ala1	F9	California_Central_LH	USA_CA_SanFranciscoBay_300BP.SG	palevioletred1	5	SouthernNorthAmerica_LH	Mexico_SierraTarahumara_PostClassic.SG	blueviolet	3	361535	4054	89172	170860	364129	6482	56173	33847	388361	4355	89.18	787039	391557	4685	83.58	251001
Mbuti	Ala1	AR0514	California_Central_LH	USA_CA_SanFranciscoBay_300BP.SG	palevioletred1	5	Uspallata	LH-MF|LH-F	goldenrod1	21	363801	4187	86889	146050	369222	6653	55.5	29132	389686	4307	90482	642700	391393	4719	82934	206837
Mbuti	Ala1	SN-15	California_Central_LH	USA_CA_SanFranciscoBay_300BP.SG	palevioletred1	5	California_SouthernChannelIslands_LH	USA_CA_SanNicolas_1600BP.SG	violet	8	371776	5537	67144	48780	NA	NA	NA	NA	39631	4675	84.78	219430	39218	5782	67828	71684
Mbuti	Ala1	SN-01	California_Central_LH	USA_CA_SanFranciscoBay_300BP.SG	palevioletred1	5	California_SouthernChannelIslands_LH	USA_CA_SanNicolas_1600BP.SG	violet	8	366081	7123	51396	23741	NA	NA	NA	NA	391055	5211	75038	99789	383519	7162	53546	32005
Mbuti	Ala1	SN-53	California_Central_LH	USA_CA_SanFranciscoBay_300BP.SG	palevioletred1	5	California_SouthernChannelIslands_LH	USA_CA_SanNicolas_1600BP.SG	violet	8	37107	4981	74504	62486	378888	9548	39681	12377	393466	4676	84.14	257250	39798	5735	69389	81345
Mbuti	Ala1	PS-03	California_Central_LH	USA_CA_SanFranciscoBay_300BP.SG	palevioletred1	5	California_SouthernMainland_LH	USA_CA_PointSal_1500BP.SG	palevioletred3	2	364713	6969	52335	25727	NA	NA	NA	NA	39099	5429	72018	109990	390836	6998	55849	35458
Mbuti	Ala1	SC-01	California_Central_LH	USA_CA_SanFranciscoBay_300BP.SG	palevioletred1	5	California_SouthernChannelIslands_LH	USA_CA_SanClemente_900BP.SG	violet	7	364521	5335	68332	49884	NA	NA	NA	NA	382935	4545	84251	219253	381664	5674	67271	71050
Mbuti	Ala1	SN-38	California_Central_LH	USA_CA_SanFranciscoBay_300BP.SG	palevioletred1	5	California_SouthernChannelIslands_LH	USA_CA_SanNicolas_1600BP.SG	violet	8	351835	7062	49822	20449	NA	NA	NA	NA	391483	5452	71809	88313	397908	7437	53.5	28380
Mbuti	Ala1	SN-39	California_Central_LH	USA_CA_SanFranciscoBay_300BP.SG	palevioletred1	5	California_SouthernChannelIslands_MH	USA_CA_SanNicolas_4800BP.SG	violet	23	360698	5534	65173	49224	NA	NA	NA	NA	388702	4822	80612	209726	386826	5801	66682	67482
Mbuti	Ala1	SC-06	California_Central_LH	USA_CA_SanFranciscoBay_300BP.SG	palevioletred1	5	California_SouthernChannelIslands_LH	USA_CA_SanClemente_900BP.SG	violet	7	369369	5882	62.8	40795	NA	NA	NA	NA	393863	4806	81.96	173250	392606	5745	68335	55553
Mbuti	Ala1	AR0510	California_Central_LH	USA_CA_SanFranciscoBay_300BP.SG	palevioletred1	5	Uspallata	LH-MF|LH-F	goldenrod1	21	364603	3926	92864	240791	372724	5861	63594	48155	390157	4416	88353	1097895	392744	463	84821	354438
Mbuti	Ala1	SN-03	California_Central_LH	USA_CA_SanFranciscoBay_300BP.SG	palevioletred1	5	California_SouthernChannelIslands_LH	USA_CA_SanNicolas_1600BP.SG	violet	8	370207	5348	69229	58877	NA	NA	NA	NA	392369	4623	84881	263969	397567	5484	72499	86324
Mbuti	Ala1	AR0508	California_Central_LH	USA_CA_SanFranciscoBay_300BP.SG	palevioletred1	5	Uspallata	LH-MF|LH-F	goldenrod1	21	364804	4175	87387	144530	373324	6734	55441	28505	393353	4376	89891	629979	396255	4732	83735	200879
Mbuti	Ala1	SN-44	California_Central_LH	USA_CA_SanFranciscoBay_300BP.SG	palevioletred1	5	California_SouthernChannelIslands_MH	USA_CA_SanNicolas_4800BP.SG	violet	23	369743	3781	97779	261293	378484	5633	67189	52431	392964	4332	90722	1188351	395207	465	84.99	385388
Mbuti	Ala1	SN-11	California_Central_LH	USA_CA_SanFranciscoBay_300BP.SG	palevioletred1	5	California_SouthernChannelIslands_LH	USA_CA_SanNicolas_1600BP.SG	violet	8	36517	4001	91263	234153	375635	5853	64173	46857	387391	4276	90592	1066549	390122	4513	86454	346670
Mbuti	Ala1	AR0504	California_Central_LH	USA_CA_SanFranciscoBay_300BP.SG	palevioletred1	5	Uspallata	LH-MF|LH-F	goldenrod1	21	366206	3941	92913	263967	377341	5502	68584	52633	388902	424	91729	1188095	39155	4478	87433	382120
Mbuti	Ala1	AR0521	California_Central_LH	USA_CA_SanFranciscoBay_300BP.SG	palevioletred1	5	Uspallata	LH-MF|LH-F	goldenrod1	21	360815	3815	94582	175369	373573	6031	61943	34934	390984	3952	98944	764631	393872	4281	92015	245092
Mbuti	AM71	AR0505	SouthPatagonia_LH	Chile_StraitOfMagellan_Kaweskar_100BP.SG	blue1	8	Uspallata	LH-MF|LH-F	goldenrod1	21	375379	5196	72246	64171	NA	NA	NA	NA	398844	4648	85816	299018	409558	5378	76159	87941
Mbuti	AM71	SN-13	SouthPatagonia_LH	Chile_StraitOfMagellan_Kaweskar_100BP.SG	blue1	8	California_SouthernChannelIslands_LH	USA_CA_SanNicolas_1600BP.SG	violet	8	356157	6498	54811	30727	NA	NA	NA	NA	388104	4908	79075	131197	395024	6681	59131	38555
Mbuti	AM71	PS-17	SouthPatagonia_LH	Chile_StraitOfMagellan_Kaweskar_100BP.SG	blue1	8	California_SouthernMainland_LH	USA_CA_PointSal_1500BP.SG	palevioletred3	2	NA	NA	NA	NA	NA	NA	NA	NA	381192	10431	36544	10521	372683	18159	20523	3097
Mbuti	AM71	CT-01	SouthPatagonia_LH	Chile_StraitOfMagellan_Kaweskar_100BP.SG	blue1	8	California_SouthernChannelIslands_LH	USA_CA_SanCatalina_400BP.SG	violet	6	367073	5079	72276	61264	NA	NA	NA	NA	396049	4608	85949	276670	403021	5664	71158	81816
Mbuti	AM71	SHN-575	SouthPatagonia_LH	Chile_StraitOfMagellan_Kaweskar_100BP.SG	blue1	8	CentralAndes_LateHorizon_LH	Peru_Sacsahuaman2_LH.Capt	darkorange2	13	374262	5607	66744	50663	NA	NA	NA	NA	NA	NA	NA	NA	NA	NA	NA	NA
Mbuti	AM71	SN-20	SouthPatagonia_LH	Chile_StraitOfMagellan_Kaweskar_100BP.SG	blue1	8	California_SouthernChannelIslands_MH	USA_CA_SanNicolas_4800BP.SG	violet	23	354381	1717	20.64	3439	NA	NA	NA	NA	384474	9299	41345	14645	38971	15814	24643	4218
Mbuti	AM71	AR0518	SouthPatagonia_LH	Chile_StraitOfMagellan_Kaweskar_100BP.SG	blue1	8	Uspallata	LH-MF|LH-F	goldenrod1	21	373967	5148	72642	59748	NA	NA	NA	NA	401348	4701	85378	279435	40737	5506	73982	82519
Mbuti	AM71	MA577	SouthPatagonia_LH	Chile_StraitOfMagellan_Kaweskar_100BP.SG	blue1	8	SouthPatagonia_LH	Argentina_NorthTierradelFiego_Selknam_100BP.SG	blue1	4	410487	5375	76367	54870	NA	NA	NA	NA	437686	4895	89408	267036	445583	5688	78333	77311
Mbuti	AM71	KCA-1364	SouthPatagonia_LH	Chile_StraitOfMagellan_Kaweskar_100BP.SG	blue1	8	CentralAndes_LateHorizon_LH	Peru_Kusicancha1_LH.Capt	darkorange2	8	375544	5522	68.01	51593	NA	NA	NA	NA	NA	NA	NA	NA	NA	NA	NA	NA
Mbuti	AM71	AR0500and513	SouthPatagonia_LH	Chile_StraitOfMagellan_Kaweskar_100BP.SG	blue1	8	Uspallata	LH-MF|LH-F	goldenrod1	21	371389	6306	58898	31360	NA	NA	NA	NA	401475	5136	78165	141036	407431	6572	61992	41402
Mbuti	AM71	PS-02	SouthPatagonia_LH	Chile_StraitOfMagellan_Kaweskar_100BP.SG	blue1	8	California_SouthernMainland_LH	USA_CA_PointSal_1500BP.SG	palevioletred3	2	NA	NA	NA	NA	NA	NA	NA	NA	388504	11081	35062	10154	NA	NA	NA	NA
Mbuti	AM71	AR0504	SouthPatagonia_LH	Chile_StraitOfMagellan_Kaweskar_100BP.SG	blue1	8	Uspallata	LH-MF|LH-F	goldenrod1	21	372188	5157	72169	63972	NA	NA	NA	NA	400802	455	88094	296612	409821	5398	75918	87352
Mbuti	AM71	MX-01	SouthPatagonia_LH	Chile_StraitOfMagellan_Kaweskar_100BP.SG	blue1	8	California_Baja_LH	Mexico_Baja_IronSprings_Unknown.SG	palevioletred1	2	363812	14645	24841	4866	NA	NA	NA	NA	396396	8194	48376	19668	402851	14498	27787	5898
Mbuti	AM71	AR0506	SouthPatagonia_LH	Chile_StraitOfMagellan_Kaweskar_100BP.SG	blue1	8	Uspallata	LH-MF|LH-F	goldenrod1	21	374413	611	61277	35803	NA	NA	NA	NA	394601	4773	82678	157736	399517	6156	64.9	46130
Mbuti	AM71	AM74	SouthPatagonia_LH	Chile_StraitOfMagellan_Kaweskar_100BP.SG	blue1	8	SouthPatagonia_LH	Chile_StraitOfMagellan_Kaweskar_100BP.SG	blue1	8	477868	7468	63991	27203	NA	NA	NA	NA	511472	54	94.72	135999	52595	6886	76376	39434
Mbuti	AM71	Yaghan894	SouthPatagonia_LH	Chile_StraitOfMagellan_Kaweskar_100BP.SG	blue1	8	SouthPatagonia_LH	Argentina_BeagleChannel_Yamana_100BP.SG	blue1	1	410034	5815	70518	44642	NA	NA	NA	NA	444333	4807	92429	222031	451932	6058	74.6	64182
Mbuti	AM71	AR0510	SouthPatagonia_LH	Chile_StraitOfMagellan_Kaweskar_100BP.SG	blue1	8	Uspallata	LH-MF|LH-F	goldenrod1	21	365546	5074	72045	58171	NA	NA	NA	NA	396492	4517	87771	271057	403437	5296	76183	79980
Mbuti	AM71	NC	SouthPatagonia_LH	Chile_StraitOfMagellan_Kaweskar_100BP.SG	blue1	8	California_SouthernMainland_LH	USA_CA_NewCuyama_1300BP.SG	palevioletred3	1	360929	6688	53967	28984	NA	NA	NA	NA	393366	4801	81936	129096	407162	6416	63.46	37919
Mbuti	AM71	AR0521	SouthPatagonia_LH	Chile_StraitOfMagellan_Kaweskar_100BP.SG	blue1	8	Uspallata	LH-MF|LH-F	goldenrod1	21	374257	5669	66021	44802	NA	NA	NA	NA	393567	4585	85832	200821	403609	5917	68209	59211
Mbuti	AM71	SM-02	SouthPatagonia_LH	Chile_StraitOfMagellan_Kaweskar_100BP.SG	blue1	8	California_NorthernChannelIslands_LH	USA_CA_SanMiguel_650BP.SG	violet	1	364287	5262	69231	55986	NA	NA	NA	NA	394836	447	88337	252658	399987	5375	74419	74615
Mbuti	AM71	SN-25	SouthPatagonia_LH	Chile_StraitOfMagellan_Kaweskar_100BP.SG	blue1	8	California_SouthernChannelIslands_MH	USA_CA_SanNicolas_4800BP.SG	violet	23	345368	17699	19513	3055	NA	NA	NA	NA	39155	1062	36869	12224	407407	18643	21853	3587
Mbuti	AM71	AR0508	SouthPatagonia_LH	Chile_StraitOfMagellan_Kaweskar_100BP.SG	blue1	8	Uspallata	LH-MF|LH-F	goldenrod1	21	372561	605	61584	36800	NA	NA	NA	NA	396844	4771	83174	164423	403212	615	65567	48245
Mbuti	AM71	AR0528	SouthPatagonia_LH	Chile_StraitOfMagellan_Kaweskar_100BP.SG	blue1	8	Uspallata	LH-MF|LH-F	goldenrod1	21	38154	6175	61792	38821	NA	NA	NA	NA	407061	4869	83598	174776	413808	5852	70.71	51203
Mbuti	AM71	SC-01	SouthPatagonia_LH	Chile_StraitOfMagellan_Kaweskar_100BP.SG	blue1	8	California_SouthernChannelIslands_LH	USA_CA_SanClemente_900BP.SG	violet	7	355697	10044	35415	10977	NA	NA	NA	NA	38272	6245	61.28	45194	37553	9382	40027	13503
Mbuti	AM71	OTT-1174	SouthPatagonia_LH	Chile_StraitOfMagellan_Kaweskar_100BP.SG	blue1	8	CentralAndes_LateIntermediate_LH	Peru_Ollantaytambo_LIP.Capt	orange1	13	37324	5918	63073	40607	NA	NA	NA	NA	NA	NA	NA	NA	NA	NA	NA	NA
Mbuti	AM71	SN-44	SouthPatagonia_LH	Chile_StraitOfMagellan_Kaweskar_100BP.SG	blue1	8	California_SouthernChannelIslands_MH	USA_CA_SanNicolas_4800BP.SG	violet	23	367687	5064	72603	62089	NA	NA	NA	NA	393221	4545	86516	280163	402258	548	73409	83177
Mbuti	AM71	KCA-3089	SouthPatagonia_LH	Chile_StraitOfMagellan_Kaweskar_100BP.SG	blue1	8	CentralAndes_LateHorizon_LH	Peru_Kusicancha2_LH.Capt	darkorange2	9	379518	58	65438	48992	NA	NA	NA	NA	NA	NA	NA	NA	NA	NA	NA	NA
Mbuti	AM71	SHN-902	SouthPatagonia_LH	Chile_StraitOfMagellan_Kaweskar_100BP.SG	blue1	8	CentralAndes_LateHorizon_LH	Peru_Sacsahuaman2_LH.Capt	darkorange2	13	369435	7158	51615	21472	NA	NA	NA	NA	NA	NA	NA	NA	NA	NA	NA	NA
Mbuti	AM71	SN-52	SouthPatagonia_LH	Chile_StraitOfMagellan_Kaweskar_100BP.SG	blue1	8	California_SouthernChannelIslands_LH	USA_CA_SanNicolas_1600BP.SG	violet	8	371521	9362	39685	12408	NA	NA	NA	NA	395349	6055	65296	53579	408903	9381	43.59	15630
Mbuti	AM71	AR0151	SouthPatagonia_LH	Chile_StraitOfMagellan_Kaweskar_100BP.SG	blue1	8	Uspallata	LH-HG|LH-HG	darkorange4	23	376996	817	46147	18715	NA	NA	NA	NA	398916	5691	70.1	89847	399716	7526	53114	26560
Mbuti	AM71	SN-10	SouthPatagonia_LH	Chile_StraitOfMagellan_Kaweskar_100BP.SG	blue1	8	California_SouthernChannelIslands_LH	USA_CA_SanNicolas_1600BP.SG	violet	8	367515	8536	43055	14496	NA	NA	NA	NA	382968	5738	66739	61055	387844	8362	46383	17973
Mbuti	AM71	AR0501	SouthPatagonia_LH	Chile_StraitOfMagellan_Kaweskar_100BP.SG	blue1	8	Uspallata	LH-MF|LH-F	goldenrod1	21	366835	8072	45447	17999	NA	NA	NA	NA	404257	5518	73262	79051	412823	7743	53315	23134
Mbuti	AM71	SHN-212	SouthPatagonia_LH	Chile_StraitOfMagellan_Kaweskar_100BP.SG	blue1	8	CentralAndes_LateHorizon_LH	Peru_Sacsahuaman1_LH.Capt	darkorange2	12	359398	10935	32866	8352	NA	NA	NA	NA	NA	NA	NA	NA	NA	NA	NA	NA
Mbuti	AM71	AR0527	SouthPatagonia_LH	Chile_StraitOfMagellan_Kaweskar_100BP.SG	blue1	8	Uspallata	LH-MF|LH-F	goldenrod1	21	371127	5599	66289	41517	NA	NA	NA	NA	400572	4816	83171	185492	409804	6154	66.59	54440
Mbuti	AM71	BC25	SouthPatagonia_LH	Chile_StraitOfMagellan_Kaweskar_100BP.SG	blue1	8	California_Baja_LH	Mexico_Pericues.SG	palevioletred1	3	36241	911	39782	11893	NA	NA	NA	NA	385603	581	66.37	57041	397745	9122	43605	16433
Mbuti	AM71	333B	SouthPatagonia_LH	Chile_StraitOfMagellan_Kaweskar_100BP.SG	blue1	8	CentralAmerica_LH	Mexico_SierraGorda_Postclassic.SG	darkviolet	3	364266	5185	70252	56936	NA	NA	NA	NA	389352	4348	89556	279216	3979	5185	76737	81604
Mbuti	AM71	SN-03	SouthPatagonia_LH	Chile_StraitOfMagellan_Kaweskar_100BP.SG	blue1	8	California_SouthernChannelIslands_LH	USA_CA_SanNicolas_1600BP.SG	violet	8	365799	9767	37453	12041	NA	NA	NA	NA	395087	638	61921	49660	394781	9762	40442	14852
Mbuti	AM71	OTT-1187	SouthPatagonia_LH	Chile_StraitOfMagellan_Kaweskar_100BP.SG	blue1	8	CentralAndes_LateIntermediate_LH	Peru_Ollantaytambo_LIP.Capt	orange1	13	374671	5441	68864	53247	NA	NA	NA	NA	NA	NA	NA	NA	NA	NA	NA	NA
Mbuti	AM71	QKI-4	SouthPatagonia_LH	Chile_StraitOfMagellan_Kaweskar_100BP.SG	blue1	8	CentralAndes_LateHorizon_LH	Peru_Qotakalli2_LH.Capt	darkorange2	11	374468	5747	65157	46943	NA	NA	NA	NA	NA	NA	NA	NA	NA	NA	NA	NA
Mbuti	AM71	OTT-1144	SouthPatagonia_LH	Chile_StraitOfMagellan_Kaweskar_100BP.SG	blue1	8	CentralAndes_LateIntermediate_LH	Peru_Ollantaytambo_LIP.Capt	orange1	13	378414	5633	67173	49746	NA	NA	NA	NA	NA	NA	NA	NA	NA	NA	NA	NA
Mbuti	AM71	F9	SouthPatagonia_LH	Chile_StraitOfMagellan_Kaweskar_100BP.SG	blue1	8	SouthernNorthAmerica_LH	Mexico_SierraTarahumara_PostClassic.SG	blueviolet	3	359267	5732	62682	43063	NA	NA	NA	NA	385771	4649	82983	215842	387113	5824	66471	62911
Mbuti	AM71	AR0526	SouthPatagonia_LH	Chile_StraitOfMagellan_Kaweskar_100BP.SG	blue1	8	Uspallata	LH-MF|LH-F	goldenrod1	21	368737	5369	68.68	52982	NA	NA	NA	NA	399017	473	84355	238764	409203	5684	71991	70542
Mbuti	AM71	AR0517	SouthPatagonia_LH	Chile_StraitOfMagellan_Kaweskar_100BP.SG	blue1	8	Uspallata	LH-MFout|LH-F	goldenrod1	23	367073	7444	49312	20949	NA	NA	NA	NA	399306	5225	76416	89291	413657	7711	53648	26387
Mbuti	AM71	B-03	SouthPatagonia_LH	Chile_StraitOfMagellan_Kaweskar_100BP.SG	blue1	8	California_Baja_LH	Mexico_Pericues_Unknown.SG	palevioletred1	4	372768	8408	44332	15467	NA	NA	NA	NA	391672	5685	68892	67866	404624	8079	50082	20136
Mbuti	AM71	SHN-492	SouthPatagonia_LH	Chile_StraitOfMagellan_Kaweskar_100BP.SG	blue1	8	CentralAndes_LateHorizon_LH	Peru_Sacsahuaman3_LH.Capt	darkorange2	14	374331	6033	62046	41310	NA	NA	NA	NA	NA	NA	NA	NA	NA	NA	NA	NA
Mbuti	AM71	QKI-21-1	SouthPatagonia_LH	Chile_StraitOfMagellan_Kaweskar_100BP.SG	blue1	8	CentralAndes_LateHorizon_LH	Peru_Qotakalli1_LH.Capt	darkorange2	10	384813	9638	39926	12189	NA	NA	NA	NA	NA	NA	NA	NA	NA	NA	NA	NA
Mbuti	AM71	KMA-2-2	SouthPatagonia_LH	Chile_StraitOfMagellan_Kaweskar_100BP.SG	blue1	8	CentralAndes_LateHorizon_LH	Peru_Kanamarka2_LH.Capt	darkorange2	6	376059	5751	65388	53458	NA	NA	NA	NA	NA	NA	NA	NA	NA	NA	NA	NA
Mbuti	AM71	E8CdV	SouthPatagonia_LH	Chile_StraitOfMagellan_Kaweskar_100BP.SG	blue1	8	CentralAmerica_LH	Mexico_CanadaDeLaVirgen_MidClassic.SG	darkviolet	2	363527	7938	45797	18281	NA	NA	NA	NA	387288	5217	74241	110104	395978	693	57.14	31783
Mbuti	AM71	SN-32	SouthPatagonia_LH	Chile_StraitOfMagellan_Kaweskar_100BP.SG	blue1	8	California_SouthernChannelIslands_MH	USA_CA_SanNicolas_4800BP.SG	violet	23	391685	13618	28762	6066	NA	NA	NA	NA	394722	7633	51715	25517	4081	12741	32.03	7436
Mbuti	AM71	PS-18	SouthPatagonia_LH	Chile_StraitOfMagellan_Kaweskar_100BP.SG	blue1	8	California_SouthernMainland_LH	USA_CA_PointSal_1500BP.SG	palevioletred3	2	372922	13763	27096	5351	NA	NA	NA	NA	388237	7321	53027	24743	39949	13244	30163	7272
Mbuti	AM71	PS-07	SouthPatagonia_LH	Chile_StraitOfMagellan_Kaweskar_100BP.SG	blue1	8	California_SouthernMainland_LH	USA_CA_PointSal_1500BP.SG	palevioletred3	2	355929	8593	41422	14752	NA	NA	NA	NA	392236	5955	65867	60938	39338	8634	45562	17813
Mbuti	AM71	AR0152	SouthPatagonia_LH	Chile_StraitOfMagellan_Kaweskar_100BP.SG	blue1	8	Uspallata	LH-HG|LH-HG	darkorange4	23	388755	11891	32694	7430	NA	NA	NA	NA	40551	7061	57428	35712	422076	10461	40347	10637
Mbuti	AM71	2417Q	SouthPatagonia_LH	Chile_StraitOfMagellan_Kaweskar_100BP.SG	blue1	8	CentralAmerica_LH	Mexico_SierraGorda_Terminalclassic.SG	darkviolet	4	372235	4912	75782	64863	NA	NA	NA	NA	396752	4659	85.16	323354	402316	528	76197	94875
Mbuti	AM71	SM-01	SouthPatagonia_LH	Chile_StraitOfMagellan_Kaweskar_100BP.SG	blue1	8	California_NorthernChannelIslands_LH	USA_CA_SanMiguel_650BP.SG	violet	1	34746	12033	28877	6498	NA	NA	NA	NA	381439	7246	52645	27860	396761	12332	32174	8164
Mbuti	AM71	Anzick	SouthPatagonia_LH	Chile_StraitOfMagellan_Kaweskar_100BP.SG	blue1	8	SouthernNorthAmerica_EH	USA_Anzick.SG	blueviolet	21	354512	508	69785	65731	NA	NA	NA	NA	381154	4563	83529	328637	385004	5316	72.43	96445
Mbuti	AM71	2417J	SouthPatagonia_LH	Chile_StraitOfMagellan_Kaweskar_100BP.SG	blue1	8	CentralAmerica_LH	Mexico_SierraGorda_Postclassic.SG	darkviolet	3	364612	5565	65524	46355	NA	NA	NA	NA	389009	4527	85925	225120	389679	5501	70837	66100
Mbuti	AM71	SN-01	SouthPatagonia_LH	Chile_StraitOfMagellan_Kaweskar_100BP.SG	blue1	8	California_SouthernChannelIslands_LH	USA_CA_SanNicolas_1600BP.SG	violet	8	338677	13635	24839	5422	NA	NA	NA	NA	399002	8114	49175	22014	426069	13874	30709	6586
Mbuti	AM71	CCA-5-1	SouthPatagonia_LH	Chile_StraitOfMagellan_Kaweskar_100BP.SG	blue1	8	CentralAndes_LateHorizon_LH	Peru_CasaConcha2_LH.Capt	darkorange2	4	372388	5504	67659	53467	NA	NA	NA	NA	NA	NA	NA	NA	NA	NA	NA	NA
Mbuti	AM71	AR0180	SouthPatagonia_LH	Chile_StraitOfMagellan_Kaweskar_100BP.SG	blue1	8	Uspallata	LH-LF|LH-F	darkorange4	22	369937	13541	27319	5666	NA	NA	NA	NA	406077	7988	50836	26930	418525	12453	33607	7961
Mbuti	AM71	KMA-28-1	SouthPatagonia_LH	Chile_StraitOfMagellan_Kaweskar_100BP.SG	blue1	8	CentralAndes_LateHorizon_LH	Peru_Kanamarka1_LH.Capt	darkorange2	5	368229	5311	69336	55087	NA	NA	NA	NA	NA	NA	NA	NA	NA	NA	NA	NA
Mbuti	AM71	Enoque65	SouthPatagonia_LH	Chile_StraitOfMagellan_Kaweskar_100BP.SG	blue1	8	Brazil_MH	Brazil_Enoque_3500BP.SG	palegreen4	21	NA	NA	NA	NA	NA	NA	NA	NA	399496	12465	32049	7808	NA	NA	NA	NA
Mbuti	AM71	SC-04	SouthPatagonia_LH	Chile_StraitOfMagellan_Kaweskar_100BP.SG	blue1	8	California_SouthernChannelIslands_LH	USA_CA_SanClemente_900BP.SG	violet	7	352294	9191	38.33	11162	NA	NA	NA	NA	3909	6195	63.1	47971	390437	9384	41608	14294
Mbuti	AM71	AR0514	SouthPatagonia_LH	Chile_StraitOfMagellan_Kaweskar_100BP.SG	blue1	8	Uspallata	LH-MF|LH-F	goldenrod1	21	372352	6078	61263	36511	NA	NA	NA	NA	397884	4908	81074	160346	404638	6432	62.91	47349
Mbuti	AM71	SN-17	SouthPatagonia_LH	Chile_StraitOfMagellan_Kaweskar_100BP.SG	blue1	8	California_SouthernChannelIslands_MH	USA_CA_SanNicolas_4800BP.SG	violet	23	364492	5331	68378	54929	NA	NA	NA	NA	394777	4712	83774	237619	405482	5803	69875	70913
Mbuti	AM71	CR-01	SouthPatagonia_LH	Chile_StraitOfMagellan_Kaweskar_100BP.SG	blue1	8	California_NorthernChannelIslands_LH	USA_CA_SantaCruz_1000BP.SG	violet	2	366726	5152	71187	62067	NA	NA	NA	NA	395461	4457	88721	281635	403157	5288	76242	83671
Mbuti	AM71	KCA-1298	SouthPatagonia_LH	Chile_StraitOfMagellan_Kaweskar_100BP.SG	blue1	8	CentralAndes_LateHorizon_LH	Peru_Kusicancha1_LH.Capt	darkorange2	8	373238	5567	67.05	50626	NA	NA	NA	NA	NA	NA	NA	NA	NA	NA	NA	NA
Mbuti	AM71	AR0509	SouthPatagonia_LH	Chile_StraitOfMagellan_Kaweskar_100BP.SG	blue1	8	Uspallata	LH-MF|LH-F	goldenrod1	21	373778	5526	67644	51874	NA	NA	NA	NA	399065	461	86564	236215	402517	5374	74904	69726
Mbuti	AM71	B-04	SouthPatagonia_LH	Chile_StraitOfMagellan_Kaweskar_100BP.SG	blue1	8	California_Baja_LH	Mexico_Baja_Comondu_Unknown.SG	palevioletred1	1	32955	16441	20044	3267	NA	NA	NA	NA	392177	10071	38.94	13760	395501	16191	24427	4081
Mbuti	AM71	KCA-1108	SouthPatagonia_LH	Chile_StraitOfMagellan_Kaweskar_100BP.SG	blue1	8	CentralAndes_LateHorizon_LH	Peru_Kusicancha1_LH.Capt	darkorange2	8	373847	5354	69832	51196	NA	NA	NA	NA	NA	NA	NA	NA	NA	NA	NA	NA
Mbuti	AM71	SN-16	SouthPatagonia_LH	Chile_StraitOfMagellan_Kaweskar_100BP.SG	blue1	8	California_SouthernChannelIslands_LH	USA_CA_SanNicolas_1600BP.SG	violet	8	367701	12048	30519	7251	NA	NA	NA	NA	397837	7223	55083	29824	40321	11364	35481	8732
Mbuti	AM71	SHN-355	SouthPatagonia_LH	Chile_StraitOfMagellan_Kaweskar_100BP.SG	blue1	8	CentralAndes_LateHorizon_LH	Peru_Sacsahuaman2_LH.Capt	darkorange2	13	377312	5626	67068	47476	NA	NA	NA	NA	NA	NA	NA	NA	NA	NA	NA	NA
Mbuti	AM71	Yaghan895	SouthPatagonia_LH	Chile_StraitOfMagellan_Kaweskar_100BP.SG	blue1	8	SouthPatagonia_LH	Argentina_BeagleChannel_Yamana_100BP.SG	blue1	1	419114	5731	73.13	48267	NA	NA	NA	NA	451312	4985	90531	242443	460109	5794	79409	69995
Mbuti	AM71	AR0520	SouthPatagonia_LH	Chile_StraitOfMagellan_Kaweskar_100BP.SG	blue1	8	Uspallata	LH-LFplc|LH-F	darkorange	22	385716	8519	45276	15929	NA	NA	NA	NA	404916	5554	72902	71726	407363	7781	52351	21166
Mbuti	AM71	AR0519	SouthPatagonia_LH	Chile_StraitOfMagellan_Kaweskar_100BP.SG	blue1	8	Uspallata	LH-MF|LH-F	goldenrod1	21	375266	5093	73688	59725	NA	NA	NA	NA	402227	4572	87981	277409	411838	545	75567	81853
Mbuti	AM71	OTT-1160	SouthPatagonia_LH	Chile_StraitOfMagellan_Kaweskar_100BP.SG	blue1	8	CentralAndes_LateIntermediate_LH	Peru_Ollantaytambo_LIP.Capt	orange1	13	374193	5545	67479	52745	NA	NA	NA	NA	NA	NA	NA	NA	NA	NA	NA	NA
Mbuti	AM71	KMA-15A-1	SouthPatagonia_LH	Chile_StraitOfMagellan_Kaweskar_100BP.SG	blue1	8	CentralAndes_LateHorizon_LH	Peru_Kanamarka1_LH.Capt	darkorange2	5	374103	5223	71622	57714	NA	NA	NA	NA	NA	NA	NA	NA	NA	NA	NA	NA
Mbuti	AM71	AR0162	SouthPatagonia_LH	Chile_StraitOfMagellan_Kaweskar_100BP.SG	blue1	8	Uspallata	LH-LF|LH-F	darkorange4	21	375714	5772	65095	44482	NA	NA	NA	NA	404673	4764	84945	195378	413831	5845	70801	57785
Mbuti	AM71	QKI-809	SouthPatagonia_LH	Chile_StraitOfMagellan_Kaweskar_100BP.SG	blue1	8	CentralAndes_LateHorizon_LH	Peru_Qotakalli1_LH.Capt	darkorange2	10	374497	5288	70827	51135	NA	NA	NA	NA	NA	NA	NA	NA	NA	NA	NA	NA
Mbuti	AM71	PS-06	SouthPatagonia_LH	Chile_StraitOfMagellan_Kaweskar_100BP.SG	blue1	8	California_SouthernMainland_LH	USA_CA_PointSal_1500BP.SG	palevioletred3	2	364124	549	66325	44191	NA	NA	NA	NA	391039	46	85007	188050	399041	5653	70592	55600
Mbuti	AM71	Ala1	SouthPatagonia_LH	Chile_StraitOfMagellan_Kaweskar_100BP.SG	blue1	8	California_Central_LH	USA_CA_SanFranciscoBay_300BP.SG	palevioletred1	5	367762	8015	45884	17210	NA	NA	NA	NA	387977	5353	72476	74975	400157	7666	52196	22444
Mbuti	AM71	PS-09	SouthPatagonia_LH	Chile_StraitOfMagellan_Kaweskar_100BP.SG	blue1	8	California_SouthernMainland_LH	USA_CA_PointSal_1500BP.SG	palevioletred3	2	382884	12744	30045	5698	NA	NA	NA	NA	395905	7683	51531	25074	391164	12557	31152	7270
Mbuti	AM71	SC-06	SouthPatagonia_LH	Chile_StraitOfMagellan_Kaweskar_100BP.SG	blue1	8	California_SouthernChannelIslands_LH	USA_CA_SanClemente_900BP.SG	violet	7	354233	10539	33612	9839	NA	NA	NA	NA	386968	6278	61642	41585	380798	97	39257	12279
Mbuti	AM71	SN-53	SouthPatagonia_LH	Chile_StraitOfMagellan_Kaweskar_100BP.SG	blue1	8	California_SouthernChannelIslands_LH	USA_CA_SanNicolas_1600BP.SG	violet	8	368098	7913	46517	17010	NA	NA	NA	NA	393466	557	70.64	74091	395911	7904	50091	21968
Mbuti	AM71	Yaghan890	SouthPatagonia_LH	Chile_StraitOfMagellan_Kaweskar_100BP.SG	blue1	8	SouthPatagonia_LH	Argentina_BeagleChannel_Yamana_100BP.SG	blue1	1	411426	7679	53576	22066	NA	NA	NA	NA	448455	5444	82.38	124554	460382	7306	63011	35372
Mbuti	AM71	SC-05	SouthPatagonia_LH	Chile_StraitOfMagellan_Kaweskar_100BP.SG	blue1	8	California_SouthernChannelIslands_LH	USA_CA_SanClemente_900BP.SG	violet	7	361209	5164	69946	64445	NA	NA	NA	NA	390486	4519	86413	298999	3998	5551	72021	88217
Mbuti	AM71	KMA-19-1	SouthPatagonia_LH	Chile_StraitOfMagellan_Kaweskar_100BP.SG	blue1	8	CentralAndes_LateHorizon_LH	Peru_Kanamarka3_LH.Capt	darkorange2	7	371551	5409	68.69	56914	NA	NA	NA	NA	NA	NA	NA	NA	NA	NA	NA	NA
Mbuti	AM71	OTT-1165	SouthPatagonia_LH	Chile_StraitOfMagellan_Kaweskar_100BP.SG	blue1	8	CentralAndes_LateIntermediate_LH	Peru_Ollantaytambo_LIP.Capt	orange1	13	374532	598	62632	37132	NA	NA	NA	NA	NA	NA	NA	NA	NA	NA	NA	NA
Mbuti	AM71	SN_50	SouthPatagonia_LH	Chile_StraitOfMagellan_Kaweskar_100BP.SG	blue1	8	California_SouthernChannelIslands_LH	USA_CA_SanNicolas_1600BP.SG	violet	8	368628	6695	55064	24695	NA	NA	NA	NA	400238	5127	78068	105900	413438	7138	57.92	31164
Mbuti	AM71	CCA-7-2	SouthPatagonia_LH	Chile_StraitOfMagellan_Kaweskar_100BP.SG	blue1	8	CentralAndes_LateHorizon_LH	Peru_CasaConcha2_LH.Capt	darkorange2	4	375992	5266	71.4	56411	NA	NA	NA	NA	NA	NA	NA	NA	NA	NA	NA	NA
Mbuti	AM71	AR0512	SouthPatagonia_LH	Chile_StraitOfMagellan_Kaweskar_100BP.SG	blue1	8	Uspallata	LH-MF|LH-F	goldenrod1	21	373254	4854	76891	64819	NA	NA	NA	NA	400233	4446	90019	305839	408059	5336	76473	90190
Mbuti	AM71	PS-03	SouthPatagonia_LH	Chile_StraitOfMagellan_Kaweskar_100BP.SG	blue1	8	California_SouthernMainland_LH	USA_CA_PointSal_1500BP.SG	palevioletred3	2	370098	13048	28365	5793	NA	NA	NA	NA	404681	8226	49196	23844	405598	12604	32179	6983
Mbuti	AM71	SN-39	SouthPatagonia_LH	Chile_StraitOfMagellan_Kaweskar_100BP.SG	blue1	8	California_SouthernChannelIslands_MH	USA_CA_SanNicolas_4800BP.SG	violet	23	368246	9791	37612	11455	NA	NA	NA	NA	387963	6113	63461	46711	38599	93	41503	13863
Mbuti	AM71	SN-38	SouthPatagonia_LH	Chile_StraitOfMagellan_Kaweskar_100BP.SG	blue1	8	California_SouthernChannelIslands_LH	USA_CA_SanNicolas_1600BP.SG	violet	8	358853	1493	24036	4559	NA	NA	NA	NA	392379	9039	43409	18779	405102	14976	2025-05-27	5557
Mbuti	AM71	SN-15	SouthPatagonia_LH	Chile_StraitOfMagellan_Kaweskar_100BP.SG	blue1	8	California_SouthernChannelIslands_LH	USA_CA_SanNicolas_1600BP.SG	violet	8	356312	10216	34876	10148	NA	NA	NA	NA	390166	6221	62713	42836	406682	9605	42339	12728
Mbuti	AM71	AR0149	SouthPatagonia_LH	Chile_StraitOfMagellan_Kaweskar_100BP.SG	blue1	8	Uspallata	LH-HG|LH-HG	darkorange4	23	366119	9307	39339	11846	NA	NA	NA	NA	400762	6089	65816	57777	404755	883	45837	16929
Mbuti	AM71	QKI-9-3	SouthPatagonia_LH	Chile_StraitOfMagellan_Kaweskar_100BP.SG	blue1	8	CentralAndes_LateHorizon_LH	Peru_Qotakalli1_LH.Capt	darkorange2	10	382702	6057	63189	38483	NA	NA	NA	NA	NA	NA	NA	NA	NA	NA	NA	NA
Mbuti	AM71	SN-11	SouthPatagonia_LH	Chile_StraitOfMagellan_Kaweskar_100BP.SG	blue1	8	California_SouthernChannelIslands_LH	USA_CA_SanNicolas_1600BP.SG	violet	8	359166	5305	67709	52980	NA	NA	NA	NA	38961	45	86587	231129	400136	5664	70646	68753
Mbuti	AM71	SC-03	SouthPatagonia_LH	Chile_StraitOfMagellan_Kaweskar_100BP.SG	blue1	8	California_SouthernChannelIslands_LH	USA_CA_SanClemente_900BP.SG	violet	7	356506	6298	56604	26026	NA	NA	NA	NA	384904	5122	75148	113793	397992	7132	55803	33100
Mbuti	AM74	PS-09	SouthPatagonia_LH	Chile_StraitOfMagellan_Kaweskar_100BP.SG	blue1	8	California_SouthernMainland_LH	USA_CA_PointSal_1500BP.SG	palevioletred3	2	357227	709	50384	22618	NA	NA	NA	NA	384939	5079	75783	94268	385985	7113	54265	28389
Mbuti	AM74	AR0151	SouthPatagonia_LH	Chile_StraitOfMagellan_Kaweskar_100BP.SG	blue1	8	Uspallata	LH-HG|LH-HG	darkorange4	23	362145	4583	79026	83242	369756	8487	43568	16162	388732	4515	86093	374136	385807	5095	75721	114936
Mbuti	AM74	SN_50	SouthPatagonia_LH	Chile_StraitOfMagellan_Kaweskar_100BP.SG	blue1	8	California_SouthernChannelIslands_LH	USA_CA_SanNicolas_1600BP.SG	violet	8	362074	4379	82693	101034	377705	7748	48747	18982	387377	4232	91525	409116	395564	5075	77951	124111
Mbuti	AM74	Anzick	SouthPatagonia_LH	Chile_StraitOfMagellan_Kaweskar_100BP.SG	blue1	8	SouthernNorthAmerica_EH	USA_Anzick.SG	blueviolet	21	352459	3664	96207	275117	355035	536	66241	52570	378666	4136	91554	1279489	38112	4493	84817	387727
Mbuti	AM74	MX-01	SouthPatagonia_LH	Chile_StraitOfMagellan_Kaweskar_100BP.SG	blue1	8	California_Baja_LH	Mexico_Baja_IronSprings_Unknown.SG	palevioletred1	2	348665	742	46989	21066	NA	NA	NA	NA	388851	5263	73881	82479	398052	7618	52251	25468
Mbuti	AM74	AR0512	SouthPatagonia_LH	Chile_StraitOfMagellan_Kaweskar_100BP.SG	blue1	8	Uspallata	LH-MF|LH-F	goldenrod1	21	367328	3621	101455	270808	369669	5433	68038	51597	396137	4071	97313	1191908	398248	4423	90042	361961
Mbuti	AM74	AR0506	SouthPatagonia_LH	Chile_StraitOfMagellan_Kaweskar_100BP.SG	blue1	8	Uspallata	LH-MF|LH-F	goldenrod1	21	368227	4017	91678	144780	37535	6892	54465	27292	397828	4017	99025	599712	400302	4534	88282	180788
Mbuti	AM74	Yaghan890	SouthPatagonia_LH	Chile_StraitOfMagellan_Kaweskar_100BP.SG	blue1	8	SouthPatagonia_LH	Argentina_BeagleChannel_Yamana_100BP.SG	blue1	1	403157	5373	75034	64462	NA	NA	NA	NA	43894	4506	97402	353905	449014	5433	82652	100813
Mbuti	AM74	Yaghan894	SouthPatagonia_LH	Chile_StraitOfMagellan_Kaweskar_100BP.SG	blue1	8	SouthPatagonia_LH	Argentina_BeagleChannel_Yamana_100BP.SG	blue1	1	400577	4204	95284	155898	414393	7083	58507	28877	436315	4291	101675	722896	441936	4663	94776	212536
Mbuti	AM74	2417Q	SouthPatagonia_LH	Chile_StraitOfMagellan_Kaweskar_100BP.SG	blue1	8	CentralAmerica_LH	Mexico_SierraGorda_Terminalclassic.SG	darkviolet	4	361671	3673	98461	270350	375678	5457	68843	51744	389931	4108	94.91	1254716	394528	4398	89703	379723
Mbuti	AM74	SHN-355	SouthPatagonia_LH	Chile_StraitOfMagellan_Kaweskar_100BP.SG	blue1	8	CentralAndes_LateHorizon_LH	Peru_Sacsahuaman2_LH.Capt	darkorange2	13	368324	3862	95379	189318	377593	5983	63111	35959	NA	NA	NA	NA	NA	NA	NA	NA
Mbuti	AM74	AR0520	SouthPatagonia_LH	Chile_StraitOfMagellan_Kaweskar_100BP.SG	blue1	8	Uspallata	LH-LFplc|LH-F	darkorange	22	364259	4971	73275	67034	383837	9094	42209	12841	390605	4495	86902	282743	39701	5549	71545	86217
Mbuti	AM74	AR0526	SouthPatagonia_LH	Chile_StraitOfMagellan_Kaweskar_100BP.SG	blue1	8	Uspallata	LH-MF|LH-F	goldenrod1	21	361778	3848	94008	219814	373641	5861	63754	41715	394765	4172	94628	933000	398349	4486	88805	283706
Mbuti	AM74	SN-13	SouthPatagonia_LH	Chile_StraitOfMagellan_Kaweskar_100BP.SG	blue1	8	California_SouthernChannelIslands_LH	USA_CA_SanNicolas_1600BP.SG	violet	8	348212	4019	86652	126695	358378	6685	53613	23750	37669	3831	98331	509617	38804	4646	83518	153958
Mbuti	AM74	CR-01	SouthPatagonia_LH	Chile_StraitOfMagellan_Kaweskar_100BP.SG	blue1	8	California_NorthernChannelIslands_LH	USA_CA_SantaCruz_1000BP.SG	violet	2	357896	3696	96832	259062	363639	5632	64568	49374	387316	4034	96018	1106100	390677	4365	89508	338054
Mbuti	AM74	AR0505	SouthPatagonia_LH	Chile_StraitOfMagellan_Kaweskar_100BP.SG	blue1	8	Uspallata	LH-MF|LH-F	goldenrod1	21	363446	3679	98783	266405	373591	5347	69863	50697	39493	3998	98779	1157013	401472	4328	92.77	350002
Mbuti	AM74	SN-15	SouthPatagonia_LH	Chile_StraitOfMagellan_Kaweskar_100BP.SG	blue1	8	California_SouthernChannelIslands_LH	USA_CA_SanNicolas_1600BP.SG	violet	8	367428	5685	64.63	44460	NA	NA	NA	NA	388424	4711	82442	178903	394833	5912	66784	55231
Mbuti	AM74	KCA-3089	SouthPatagonia_LH	Chile_StraitOfMagellan_Kaweskar_100BP.SG	blue1	8	CentralAndes_LateHorizon_LH	Peru_Kusicancha2_LH.Capt	darkorange2	9	369545	3673	100623	194611	369105	61	60514	36624	NA	NA	NA	NA	NA	NA	NA	NA
Mbuti	AM74	CCA-7-2	SouthPatagonia_LH	Chile_StraitOfMagellan_Kaweskar_100BP.SG	blue1	8	CentralAndes_LateHorizon_LH	Peru_CasaConcha2_LH.Capt	darkorange2	4	370742	3674	100.92	226068	373029	5764	64714	42659	NA	NA	NA	NA	NA	NA	NA	NA
Mbuti	AM74	QKI-4	SouthPatagonia_LH	Chile_StraitOfMagellan_Kaweskar_100BP.SG	blue1	8	CentralAndes_LateHorizon_LH	Peru_Qotakalli2_LH.Capt	darkorange2	11	364104	3794	95974	187523	372965	6248	59.69	35497	NA	NA	NA	NA	NA	NA	NA	NA
Mbuti	AM74	Enoque65	SouthPatagonia_LH	Chile_StraitOfMagellan_Kaweskar_100BP.SG	blue1	8	Brazil_MH	Brazil_Enoque_3500BP.SG	palegreen4	21	NA	NA	NA	NA	NA	NA	NA	NA	383903	6497	59085	34638	NA	NA	NA	NA
Mbuti	AM74	SM-02	SouthPatagonia_LH	Chile_StraitOfMagellan_Kaweskar_100BP.SG	blue1	8	California_NorthernChannelIslands_LH	USA_CA_SanMiguel_650BP.SG	violet	1	361866	3832	94431	231633	373818	5945	62884	43955	389897	4118	94683	978102	392279	4454	88067	297372
Mbuti	AM74	AR0519	SouthPatagonia_LH	Chile_StraitOfMagellan_Kaweskar_100BP.SG	blue1	8	Uspallata	LH-MF|LH-F	goldenrod1	21	368099	366	100579	247731	374048	5584	66989	47282	398057	3925	101407	1076718	402661	4322	93165	327111
Mbuti	AM74	Ala1	SouthPatagonia_LH	Chile_StraitOfMagellan_Kaweskar_100BP.SG	blue1	8	California_Central_LH	USA_CA_SanFranciscoBay_300BP.SG	palevioletred1	5	354055	4777	74.11	79176	365385	8777	41629	15301	380802	3934	96801	329527	387573	4914	78876	102127
Mbuti	AM74	AR0501	SouthPatagonia_LH	Chile_StraitOfMagellan_Kaweskar_100BP.SG	blue1	8	Uspallata	LH-MF|LH-F	goldenrod1	21	369553	4573	80809	74212	371578	8708	42672	13886	399875	4243	94243	306488	403858	5021	80435	92146
Mbuti	AM74	SN-01	SouthPatagonia_LH	Chile_StraitOfMagellan_Kaweskar_100BP.SG	blue1	8	California_SouthernChannelIslands_LH	USA_CA_SanNicolas_1600BP.SG	violet	8	35333	7338	48151	22930	NA	NA	NA	NA	385562	5072	76018	90012	395421	7678	51.5	27458
Mbuti	AM74	KCA-1298	SouthPatagonia_LH	Chile_StraitOfMagellan_Kaweskar_100BP.SG	blue1	8	CentralAndes_LateHorizon_LH	Peru_Kusicancha1_LH.Capt	darkorange2	8	36609	3801	96321	197031	366386	6187	59216	37105	NA	NA	NA	NA	NA	NA	NA	NA
Mbuti	AM74	QKI-809	SouthPatagonia_LH	Chile_StraitOfMagellan_Kaweskar_100BP.SG	blue1	8	CentralAndes_LateHorizon_LH	Peru_Qotakalli1_LH.Capt	darkorange2	10	372286	3644	102.16	205830	376035	6044	62219	38995	NA	NA	NA	NA	NA	NA	NA	NA
Mbuti	AM74	OTT-1187	SouthPatagonia_LH	Chile_StraitOfMagellan_Kaweskar_100BP.SG	blue1	8	CentralAndes_LateIntermediate_LH	Peru_Ollantaytambo_LIP.Capt	orange1	13	363413	3728	97488	213639	368942	5779	63838	40458	NA	NA	NA	NA	NA	NA	NA	NA
Mbuti	AM74	SC-03	SouthPatagonia_LH	Chile_StraitOfMagellan_Kaweskar_100BP.SG	blue1	8	California_SouthernChannelIslands_LH	USA_CA_SanClemente_900BP.SG	violet	7	351801	4169	84386	105953	368072	7944	46336	20018	381212	4205	90.66	434413	386639	5216	74125	130002
Mbuti	AM74	SN-44	SouthPatagonia_LH	Chile_StraitOfMagellan_Kaweskar_100BP.SG	blue1	8	California_SouthernChannelIslands_MH	USA_CA_SanNicolas_4800BP.SG	violet	23	362311	3648	99.32	259994	37319	5626	66336	49561	390917	4126	94737	1103890	394335	4536	86932	337474
Mbuti	AM74	SN-11	SouthPatagonia_LH	Chile_StraitOfMagellan_Kaweskar_100BP.SG	blue1	8	California_SouthernChannelIslands_LH	USA_CA_SanNicolas_1600BP.SG	violet	8	353427	3719	95032	225977	369554	5895	62689	42956	380702	3889	97.89	934003	388296	4299	90331	285875
Mbuti	AM74	E8CdV	SouthPatagonia_LH	Chile_StraitOfMagellan_Kaweskar_100BP.SG	blue1	8	CentralAmerica_LH	Mexico_CanadaDeLaVirgen_MidClassic.SG	darkviolet	2	355722	4704	75.62	74488	364084	9109	39968	14080	38485	4094	94011	412156	385151	4713	81723	122634
Mbuti	AM74	KCA-1108	SouthPatagonia_LH	Chile_StraitOfMagellan_Kaweskar_100BP.SG	blue1	8	CentralAndes_LateHorizon_LH	Peru_Kusicancha1_LH.Capt	darkorange2	8	365211	3759	97165	202772	374391	581	64443	38181	NA	NA	NA	NA	NA	NA	NA	NA
Mbuti	AM74	KMA-28-1	SouthPatagonia_LH	Chile_StraitOfMagellan_Kaweskar_100BP.SG	blue1	8	CentralAndes_LateHorizon_LH	Peru_Kanamarka1_LH.Capt	darkorange2	5	363325	3859	94.16	222405	367895	5899	62369	42151	NA	NA	NA	NA	NA	NA	NA	NA
Mbuti	AM74	PS-07	SouthPatagonia_LH	Chile_StraitOfMagellan_Kaweskar_100BP.SG	blue1	8	California_SouthernMainland_LH	USA_CA_PointSal_1500BP.SG	palevioletred3	2	361346	5053	71505	58161	NA	NA	NA	NA	391247	4524	86476	228109	393325	5684	69199	68736
Mbuti	AM74	OTT-1174	SouthPatagonia_LH	Chile_StraitOfMagellan_Kaweskar_100BP.SG	blue1	8	CentralAndes_LateIntermediate_LH	Peru_Ollantaytambo_LIP.Capt	orange1	13	365424	3959	92293	160808	3774	6421	58776	30204	NA	NA	NA	NA	NA	NA	NA	NA
Mbuti	AM74	SN-38	SouthPatagonia_LH	Chile_StraitOfMagellan_Kaweskar_100BP.SG	blue1	8	California_SouthernChannelIslands_LH	USA_CA_SanNicolas_1600BP.SG	violet	8	360087	7872	45742	19751	NA	NA	NA	NA	390717	5727	68219	76765	402268	7865	51148	23407
Mbuti	AM74	SN-39	SouthPatagonia_LH	Chile_StraitOfMagellan_Kaweskar_100BP.SG	blue1	8	California_SouthernChannelIslands_MH	USA_CA_SanNicolas_4800BP.SG	violet	23	351418	5472	64216	48121	NA	NA	NA	NA	386497	4505	85802	187512	392385	5849	67081	57470
Mbuti	AM74	PS-02	SouthPatagonia_LH	Chile_StraitOfMagellan_Kaweskar_100BP.SG	blue1	8	California_SouthernMainland_LH	USA_CA_PointSal_1500BP.SG	palevioletred3	2	NA	NA	NA	NA	NA	NA	NA	NA	384009	6386	60129	39107	NA	NA	NA	NA
Mbuti	AM74	CT-01	SouthPatagonia_LH	Chile_StraitOfMagellan_Kaweskar_100BP.SG	blue1	8	California_SouthernChannelIslands_LH	USA_CA_SanCatalina_400BP.SG	violet	6	35778	3675	97358	254798	365867	5691	64291	48571	387908	4	96966	1079791	391684	4291	91288	328902
Mbuti	AM74	AR0508	SouthPatagonia_LH	Chile_StraitOfMagellan_Kaweskar_100BP.SG	blue1	8	Uspallata	LH-MF|LH-F	goldenrod1	21	365798	4098	89265	150888	378111	6936	54513	28492	391939	4244	92353	633618	398815	4651	85756	191101
Mbuti	AM74	KMA-2-2	SouthPatagonia_LH	Chile_StraitOfMagellan_Kaweskar_100BP.SG	blue1	8	CentralAndes_LateHorizon_LH	Peru_Kanamarka2_LH.Capt	darkorange2	6	364537	3774	96.58	214163	372685	6158	60516	40453	NA	NA	NA	NA	NA	NA	NA	NA
Mbuti	AM74	OTT-1165	SouthPatagonia_LH	Chile_StraitOfMagellan_Kaweskar_100BP.SG	blue1	8	CentralAndes_LateIntermediate_LH	Peru_Ollantaytambo_LIP.Capt	orange1	13	369499	4013	92078	146596	377791	6765	55847	27709	NA	NA	NA	NA	NA	NA	NA	NA
Mbuti	AM74	AR0504	SouthPatagonia_LH	Chile_StraitOfMagellan_Kaweskar_100BP.SG	blue1	8	Uspallata	LH-MF|LH-F	goldenrod1	21	362712	3639	99667	267261	370781	5453	67993	50827	394821	3996	98799	1154713	398551	4328	92088	350363
Mbuti	AM74	MA577	SouthPatagonia_LH	Chile_StraitOfMagellan_Kaweskar_100BP.SG	blue1	8	SouthPatagonia_LH	Argentina_NorthTierradelFiego_Selknam_100BP.SG	blue1	4	406712	4178	97341	214923	410755	5854	70.17	40497	438474	4304	101884	970484	441789	4638	95255	288837
Mbuti	AM74	AR0521	SouthPatagonia_LH	Chile_StraitOfMagellan_Kaweskar_100BP.SG	blue1	8	Uspallata	LH-MF|LH-F	goldenrod1	21	366104	3851	95061	183909	371404	6054	61347	34905	394303	3877	101707	771377	39817	4251	93663	233600
Mbuti	AM74	Yaghan895	SouthPatagonia_LH	Chile_StraitOfMagellan_Kaweskar_100BP.SG	blue1	8	SouthPatagonia_LH	Argentina_BeagleChannel_Yamana_100BP.SG	blue1	1	409377	406	100843	169262	412279	6581	62647	31509	444304	4243	104707	792524	449422	472	95209	232764
Mbuti	AM74	CCA-5-1	SouthPatagonia_LH	Chile_StraitOfMagellan_Kaweskar_100BP.SG	blue1	8	CentralAndes_LateHorizon_LH	Peru_CasaConcha2_LH.Capt	darkorange2	4	364743	3674	99274	216691	36633	582	62.94	40978	NA	NA	NA	NA	NA	NA	NA	NA
Mbuti	AM74	OTT-1144	SouthPatagonia_LH	Chile_StraitOfMagellan_Kaweskar_100BP.SG	blue1	8	CentralAndes_LateIntermediate_LH	Peru_Ollantaytambo_LIP.Capt	orange1	13	367786	3743	98254	197585	374123	5832	64148	37246	NA	NA	NA	NA	NA	NA	NA	NA
Mbuti	AM74	KMA-19-1	SouthPatagonia_LH	Chile_StraitOfMagellan_Kaweskar_100BP.SG	blue1	8	CentralAndes_LateHorizon_LH	Peru_Kanamarka3_LH.Capt	darkorange2	7	360343	37	97377	226947	367678	5719	64293	42739	NA	NA	NA	NA	NA	NA	NA	NA
Mbuti	AM74	AR0500and513	SouthPatagonia_LH	Chile_StraitOfMagellan_Kaweskar_100BP.SG	blue1	8	Uspallata	LH-MF|LH-F	goldenrod1	21	356338	4013	88793	127899	359558	6968	51599	24277	388623	4119	94353	542300	392172	4666	84041	164274
Mbuti	AM74	SHN-212	SouthPatagonia_LH	Chile_StraitOfMagellan_Kaweskar_100BP.SG	blue1	8	CentralAndes_LateHorizon_LH	Peru_Sacsahuaman1_LH.Capt	darkorange2	12	360189	6074	59299	32087	NA	NA	NA	NA	NA	NA	NA	NA	NA	NA	NA	NA
Mbuti	AM74	SN-53	SouthPatagonia_LH	Chile_StraitOfMagellan_Kaweskar_100BP.SG	blue1	8	California_SouthernChannelIslands_LH	USA_CA_SanNicolas_1600BP.SG	violet	8	351486	4796	73293	67877	353996	9007	39.3	12798	387048	4404	87896	277569	392393	5499	71351	83876
Mbuti	AM74	PS-06	SouthPatagonia_LH	Chile_StraitOfMagellan_Kaweskar_100BP.SG	blue1	8	California_SouthernMainland_LH	USA_CA_PointSal_1500BP.SG	palevioletred3	2	354763	3828	92677	184624	358862	6043	59382	34998	38478	4084	94215	741819	387379	4411	87816	225822
Mbuti	AM74	SN-17	SouthPatagonia_LH	Chile_StraitOfMagellan_Kaweskar_100BP.SG	blue1	8	California_SouthernChannelIslands_MH	USA_CA_SanNicolas_4800BP.SG	violet	23	360277	3841	93808	233805	36742	5673	64768	44552	387043	414	93494	961819	392038	4485	87417	295362
Mbuti	AM74	SN-25	SouthPatagonia_LH	Chile_StraitOfMagellan_Kaweskar_100BP.SG	blue1	8	California_SouthernChannelIslands_MH	USA_CA_SanNicolas_4800BP.SG	violet	23	362095	862	42005	13466	NA	NA	NA	NA	399929	5819	68727	52238	413415	9414	43917	16021
Mbuti	AM74	AR0514	SouthPatagonia_LH	Chile_StraitOfMagellan_Kaweskar_100BP.SG	blue1	8	Uspallata	LH-MF|LH-F	goldenrod1	21	363021	4111	88298	150191	374832	6639	56461	28424	395495	4222	93664	623236	400752	4786	83.73	189508
Mbuti	AM74	PS-03	SouthPatagonia_LH	Chile_StraitOfMagellan_Kaweskar_100BP.SG	blue1	8	California_SouthernMainland_LH	USA_CA_PointSal_1500BP.SG	palevioletred3	2	359245	7306	49172	24488	NA	NA	NA	NA	388151	5362	72383	96451	392722	7585	51778	29531
Mbuti	AM74	AR0528	SouthPatagonia_LH	Chile_StraitOfMagellan_Kaweskar_100BP.SG	blue1	8	Uspallata	LH-MF|LH-F	goldenrod1	21	363528	3909	93001	157979	366912	6367	57626	29877	394346	3963	99.51	667832	39678	4425	89.66	201062
Mbuti	AM74	AR0152	SouthPatagonia_LH	Chile_StraitOfMagellan_Kaweskar_100BP.SG	blue1	8	Uspallata	LH-HG|LH-HG	darkorange4	23	360637	6121	58915	33137	NA	NA	NA	NA	39808	4992	79749	147733	397803	6244	63706	45633
Mbuti	AM74	AR0518	SouthPatagonia_LH	Chile_StraitOfMagellan_Kaweskar_100BP.SG	blue1	8	Uspallata	LH-MF|LH-F	goldenrod1	21	366094	3745	97753	248542	370957	5343	69429	47365	396346	4067	97458	1089486	39923	4367	91427	330941
Mbuti	AM74	333B	SouthPatagonia_LH	Chile_StraitOfMagellan_Kaweskar_100BP.SG	blue1	8	CentralAmerica_LH	Mexico_SierraGorda_Postclassic.SG	darkviolet	3	359207	3616	99.34	233569	367948	5659	65.02	44268	38643	3897	99156	1067527	391715	4208	93095	321717
Mbuti	AM74	SN-32	SouthPatagonia_LH	Chile_StraitOfMagellan_Kaweskar_100BP.SG	blue1	8	California_SouthernChannelIslands_MH	USA_CA_SanNicolas_4800BP.SG	violet	23	367887	7172	51295	25364	NA	NA	NA	NA	391852	5086	77044	101453	399287	6617	60343	30918
Mbuti	AM74	SHN-902	SouthPatagonia_LH	Chile_StraitOfMagellan_Kaweskar_100BP.SG	blue1	8	CentralAndes_LateHorizon_LH	Peru_Sacsahuaman2_LH.Capt	darkorange2	13	362055	4702	77008	81832	366445	8447	43.38	15299	NA	NA	NA	NA	NA	NA	NA	NA
Mbuti	AM74	AR0162	SouthPatagonia_LH	Chile_StraitOfMagellan_Kaweskar_100BP.SG	blue1	8	Uspallata	LH-LF|LH-F	darkorange4	21	366063	3978	92031	183327	37083	6369	58.22	35075	396785	4239	93603	762164	401597	4716	85149	232059
Mbuti	AM74	PS-18	SouthPatagonia_LH	Chile_StraitOfMagellan_Kaweskar_100BP.SG	blue1	8	California_SouthernMainland_LH	USA_CA_PointSal_1500BP.SG	palevioletred3	2	363422	7564	48046	21207	NA	NA	NA	NA	3885	5313	73124	91544	403209	7356	54815	27668
Mbuti	AM74	AR0527	SouthPatagonia_LH	Chile_StraitOfMagellan_Kaweskar_100BP.SG	blue1	8	Uspallata	LH-MF|LH-F	goldenrod1	21	364019	4001	90985	169233	370148	6527	56707	32173	394805	4174	94578	708485	399969	4594	87072	214405
Mbuti	AM74	SM-01	SouthPatagonia_LH	Chile_StraitOfMagellan_Kaweskar_100BP.SG	blue1	8	California_NorthernChannelIslands_LH	USA_CA_SanMiguel_650BP.SG	violet	1	356446	6859	51971	26170	NA	NA	NA	NA	386173	517	74695	105293	393728	6825	57.69	31722
Mbuti	AM74	NC	SouthPatagonia_LH	Chile_StraitOfMagellan_Kaweskar_100BP.SG	blue1	8	California_SouthernMainland_LH	USA_CA_NewCuyama_1300BP.SG	palevioletred3	1	358976	4236	84741	116957	362579	7276	49831	22290	388249	4066	95478	485784	391713	4569	85739	146852
Mbuti	AM74	SC-06	SouthPatagonia_LH	Chile_StraitOfMagellan_Kaweskar_100BP.SG	blue1	8	California_SouthernChannelIslands_LH	USA_CA_SanClemente_900BP.SG	violet	7	361679	5925	61042	40997	NA	NA	NA	NA	396107	4747	83437	163818	401562	6358	63154	50122
Mbuti	AM74	SN-10	SouthPatagonia_LH	Chile_StraitOfMagellan_Kaweskar_100BP.SG	blue1	8	California_SouthernChannelIslands_LH	USA_CA_SanNicolas_1600BP.SG	violet	8	35607	5033	70752	60404	NA	NA	NA	NA	383518	4549	84308	239228	39117	5577	70142	72355
Mbuti	AM74	OTT-1160	SouthPatagonia_LH	Chile_StraitOfMagellan_Kaweskar_100BP.SG	blue1	8	CentralAndes_LateIntermediate_LH	Peru_Ollantaytambo_LIP.Capt	orange1	13	364683	3782	96416	204631	367601	6006	61.21	38522	NA	NA	NA	NA	NA	NA	NA	NA
Mbuti	AM74	B-03	SouthPatagonia_LH	Chile_StraitOfMagellan_Kaweskar_100BP.SG	blue1	8	California_Baja_LH	Mexico_Pericues_Unknown.SG	palevioletred1	4	35404	4804	73698	64305	354928	8703	40.78	12206	384446	4426	86851	263647	389402	5348	72818	80259
Mbuti	AM74	AR0509	SouthPatagonia_LH	Chile_StraitOfMagellan_Kaweskar_100BP.SG	blue1	8	Uspallata	LH-MF|LH-F	goldenrod1	21	367827	3681	99931	215106	375253	5722	65576	40881	397086	4075	97446	921906	40159	4451	90218	279443
Mbuti	AM74	F9	SouthPatagonia_LH	Chile_StraitOfMagellan_Kaweskar_100BP.SG	blue1	8	SouthernNorthAmerica_LH	Mexico_SierraTarahumara_PostClassic.SG	blueviolet	3	35278	379	93076	176863	360675	6226	57932	33585	380411	3821	99555	824194	384406	4262	90196	247052
Mbuti	AM74	KCA-1364	SouthPatagonia_LH	Chile_StraitOfMagellan_Kaweskar_100BP.SG	blue1	8	CentralAndes_LateHorizon_LH	Peru_Kusicancha1_LH.Capt	darkorange2	8	366215	361	101437	206927	374805	5976	62715	39005	NA	NA	NA	NA	NA	NA	NA	NA
Mbuti	AM74	SHN-575	SouthPatagonia_LH	Chile_StraitOfMagellan_Kaweskar_100BP.SG	blue1	8	CentralAndes_LateHorizon_LH	Peru_Sacsahuaman2_LH.Capt	darkorange2	13	368648	383	96265	208329	375551	5974	62869	39170	NA	NA	NA	NA	NA	NA	NA	NA
Mbuti	AM74	KMA-15A-1	SouthPatagonia_LH	Chile_StraitOfMagellan_Kaweskar_100BP.SG	blue1	8	CentralAndes_LateHorizon_LH	Peru_Kanamarka1_LH.Capt	darkorange2	5	366691	3742	97984	231853	375602	588	63873	43929	NA	NA	NA	NA	NA	NA	NA	NA
Mbuti	AM74	SN-16	SouthPatagonia_LH	Chile_StraitOfMagellan_Kaweskar_100BP.SG	blue1	8	California_SouthernChannelIslands_LH	USA_CA_SanNicolas_1600BP.SG	violet	8	360378	6537	55132	29970	NA	NA	NA	NA	379552	4712	80549	117153	383116	6236	61438	35407
Mbuti	AM74	AR0180	SouthPatagonia_LH	Chile_StraitOfMagellan_Kaweskar_100BP.SG	blue1	8	Uspallata	LH-LF|LH-F	darkorange4	22	367514	6898	53281	24921	NA	NA	NA	NA	39939	5205	76734	109789	409811	7504	54615	33594
Mbuti	AM74	AR0510	SouthPatagonia_LH	Chile_StraitOfMagellan_Kaweskar_100BP.SG	blue1	8	Uspallata	LH-MF|LH-F	goldenrod1	21	363532	3802	95624	242503	369499	5723	64569	46098	391224	4052	96556	1057643	393954	4439	88739	321108
Mbuti	AM74	SC-04	SouthPatagonia_LH	Chile_StraitOfMagellan_Kaweskar_100BP.SG	blue1	8	California_SouthernChannelIslands_LH	USA_CA_SanClemente_900BP.SG	violet	7	352878	5336	66131	47540	NA	NA	NA	NA	384486	4375	87878	193295	394075	5602	70344	59282
Mbuti	AM74	B-04	SouthPatagonia_LH	Chile_StraitOfMagellan_Kaweskar_100BP.SG	blue1	8	California_Baja_LH	Mexico_Baja_Comondu_Unknown.SG	palevioletred1	1	351784	8672	40566	13978	NA	NA	NA	NA	3821	5733	66649	55629	386486	8907	43389	16930
Mbuti	AM74	SN-03	SouthPatagonia_LH	Chile_StraitOfMagellan_Kaweskar_100BP.SG	blue1	8	California_SouthernChannelIslands_LH	USA_CA_SanNicolas_1600BP.SG	violet	8	354113	5375	65.88	53909	NA	NA	NA	NA	387097	4509	85857	211415	386007	5888	65555	65727
Mbuti	AM74	BC25	SouthPatagonia_LH	Chile_StraitOfMagellan_Kaweskar_100BP.SG	blue1	8	California_Baja_LH	Mexico_Pericues.SG	palevioletred1	3	352617	5613	62817	41392	NA	NA	NA	NA	382309	4521	84557	184563	387208	5958	64986	54217
Mbuti	AM74	SN-20	SouthPatagonia_LH	Chile_StraitOfMagellan_Kaweskar_100BP.SG	blue1	8	California_SouthernChannelIslands_MH	USA_CA_SanNicolas_4800BP.SG	violet	23	357121	9346	38212	13747	NA	NA	NA	NA	396559	5689	69712	55078	407156	902	45.14	16727
Mbuti	AM74	SC-01	SouthPatagonia_LH	Chile_StraitOfMagellan_Kaweskar_100BP.SG	blue1	8	California_SouthernChannelIslands_LH	USA_CA_SanClemente_900BP.SG	violet	7	353554	5229	67613	46989	NA	NA	NA	NA	383783	456	84.17	185497	390707	6012	64984	56824
Mbuti	AM74	PS-17	SouthPatagonia_LH	Chile_StraitOfMagellan_Kaweskar_100BP.SG	blue1	8	California_SouthernMainland_LH	USA_CA_PointSal_1500BP.SG	palevioletred3	2	NA	NA	NA	NA	NA	NA	NA	NA	380894	6521	58407	42772	380924	10069	37831	13198
Mbuti	AM74	SN-52	SouthPatagonia_LH	Chile_StraitOfMagellan_Kaweskar_100BP.SG	blue1	8	California_SouthernChannelIslands_LH	USA_CA_SanNicolas_1600BP.SG	violet	8	358678	5429	66067	50143	NA	NA	NA	NA	384428	4516	85134	199723	384688	571	67369	59767
Mbuti	AM74	SHN-492	SouthPatagonia_LH	Chile_StraitOfMagellan_Kaweskar_100BP.SG	blue1	8	CentralAndes_LateHorizon_LH	Peru_Sacsahuaman3_LH.Capt	darkorange2	14	367531	3926	93625	159408	374447	6352	58949	29886	NA	NA	NA	NA	NA	NA	NA	NA
Mbuti	AM74	QKI-9-3	SouthPatagonia_LH	Chile_StraitOfMagellan_Kaweskar_100BP.SG	blue1	8	CentralAndes_LateHorizon_LH	Peru_Qotakalli1_LH.Capt	darkorange2	10	368124	3924	93808	148320	377015	6976	54043	27881	NA	NA	NA	NA	NA	NA	NA	NA
Mbuti	AM74	QKI-21-1	SouthPatagonia_LH	Chile_StraitOfMagellan_Kaweskar_100BP.SG	blue1	8	CentralAndes_LateHorizon_LH	Peru_Qotakalli1_LH.Capt	darkorange2	10	362949	5265	68939	46776	NA	NA	NA	NA	NA	NA	NA	NA	NA	NA	NA	NA
Mbuti	AM74	SC-05	SouthPatagonia_LH	Chile_StraitOfMagellan_Kaweskar_100BP.SG	blue1	8	California_SouthernChannelIslands_LH	USA_CA_SanClemente_900BP.SG	violet	7	354131	3584	98819	268555	361283	5533	65301	51075	383949	3906	98309	1161038	389385	4168	93415	352438
Mbuti	AM74	AR0517	SouthPatagonia_LH	Chile_StraitOfMagellan_Kaweskar_100BP.SG	blue1	8	Uspallata	LH-MFout|LH-F	goldenrod1	23	362694	4357	83245	86574	380193	8033	47.33	16336	392985	4165	94355	348456	398824	488	81.73	106022
Mbuti	AM74	2417J	SouthPatagonia_LH	Chile_StraitOfMagellan_Kaweskar_100BP.SG	blue1	8	CentralAmerica_LH	Mexico_SierraGorda_Postclassic.SG	darkviolet	3	361696	3825	94563	195215	369547	6255	59081	37184	388346	3842	101088	880362	394766	421	93758	266323
Mbuti	AM74	AR0149	SouthPatagonia_LH	Chile_StraitOfMagellan_Kaweskar_100BP.SG	blue1	8	Uspallata	LH-HG|LH-HG	darkorange4	23	367496	5595	65681	51464	NA	NA	NA	NA	395668	4424	89439	234180	39889	551	72398	71169
Mbuti	Anzick	PS-17	SouthernNorthAmerica_EH	USA_Anzick.SG	blueviolet	21	California_SouthernMainland_LH	USA_CA_PointSal_1500BP.SG	palevioletred3	2	NA	NA	NA	NA	NA	NA	NA	NA	379437	5067	74881	147686	385305	6589	58475	47063
Mbuti	Anzick	AR0162	SouthernNorthAmerica_EH	USA_Anzick.SG	blueviolet	21	Uspallata	LH-LF|LH-F	darkorange4	21	359166	3639	98.69	562043	361233	4669	77369	110566	384406	4369	87991	2475242	38776	4538	85451	780725
Mbuti	Anzick	NC	SouthernNorthAmerica_EH	USA_Anzick.SG	blueviolet	21	California_SouthernMainland_LH	USA_CA_NewCuyama_1300BP.SG	palevioletred3	1	35796	3479	102895	335732	356257	4936	72178	65646	382602	4022	95117	1438761	387412	4346	89.14	447693
Mbuti	Anzick	SC-03	SouthernNorthAmerica_EH	USA_Anzick.SG	blueviolet	21	California_SouthernChannelIslands_LH	USA_CA_SanClemente_900BP.SG	violet	7	353444	3592	98391	318310	359283	5147	69811	61683	383012	4177	91686	1355260	38718	4592	84308	418828
Mbuti	Anzick	KMA-2-2	SouthernNorthAmerica_EH	USA_Anzick.SG	blueviolet	21	CentralAndes_LateHorizon_LH	Peru_Kanamarka2_LH.Capt	darkorange2	6	360677	3444	104714	624636	362857	4401	82441	121181	NA	NA	NA	NA	NA	NA	NA	NA
Mbuti	Anzick	PS-02	SouthernNorthAmerica_EH	USA_Anzick.SG	blueviolet	21	California_SouthernMainland_LH	USA_CA_PointSal_1500BP.SG	palevioletred3	2	NA	NA	NA	NA	NA	NA	NA	NA	379605	4907	77365	125029	NA	NA	NA	NA
Mbuti	Anzick	CT-01	SouthernNorthAmerica_EH	USA_Anzick.SG	blueviolet	21	California_SouthernChannelIslands_LH	USA_CA_SanCatalina_400BP.SG	violet	6	35705	3519	101449	794362	359488	4328	83058	156563	38369	4338	88446	3545998	386021	4445	86845	1117563
Mbuti	Anzick	B-04	SouthernNorthAmerica_EH	USA_Anzick.SG	blueviolet	21	California_Baja_LH	Mexico_Baja_Comondu_Unknown.SG	palevioletred1	1	352147	5525	63737	44522	NA	NA	NA	NA	378767	4803	78858	189406	383437	5782	66319	59387
Mbuti	Anzick	SN-52	SouthernNorthAmerica_EH	USA_Anzick.SG	blueviolet	21	California_SouthernChannelIslands_LH	USA_CA_SanNicolas_1600BP.SG	violet	8	356112	3989	89281	147215	NA	NA	NA	NA	381739	4199	90911	608224	381358	4628	82406	188540
Mbuti	Anzick	AR0517	SouthernNorthAmerica_EH	USA_Anzick.SG	blueviolet	21	Uspallata	LH-MFout|LH-F	goldenrod1	23	358138	3761	95212	266505	366788	549	66815	52011	381031	4299	88623	1141564	382765	4694	81544	360461
Mbuti	Anzick	KCA-1364	SouthernNorthAmerica_EH	USA_Anzick.SG	blueviolet	21	CentralAndes_LateHorizon_LH	Peru_Kusicancha1_LH.Capt	darkorange2	8	360549	3333	108163	601288	36681	4348	84369	116427	NA	NA	NA	NA	NA	NA	NA	NA
Mbuti	Anzick	MX-01	SouthernNorthAmerica_EH	USA_Anzick.SG	blueviolet	21	California_Baja_LH	Mexico_Baja_IronSprings_Unknown.SG	palevioletred1	2	351231	4743	74057	70056	NA	NA	NA	NA	378441	4647	81436	301705	381905	5542	68917	96317
Mbuti	Anzick	AR0518	SouthernNorthAmerica_EH	USA_Anzick.SG	blueviolet	21	Uspallata	LH-MF|LH-F	goldenrod1	21	361689	3681	98251	777929	366392	444	82518	153103	386245	4529	85.28	3623121	388593	4673	83155	1140772
Mbuti	Anzick	PS-09	SouthernNorthAmerica_EH	USA_Anzick.SG	blueviolet	21	California_SouthernMainland_LH	USA_CA_PointSal_1500BP.SG	palevioletred3	2	357598	4848	73767	67392	NA	NA	NA	NA	381901	4531	84.29	291376	384891	5302	72597	90455
Mbuti	Anzick	PS-18	SouthernNorthAmerica_EH	USA_Anzick.SG	blueviolet	21	California_SouthernMainland_LH	USA_CA_PointSal_1500BP.SG	palevioletred3	2	359419	5124	70141	62832	NA	NA	NA	NA	38517	4581	84087	281933	394106	5494	71731	88180
Mbuti	Anzick	SN-20	SouthernNorthAmerica_EH	USA_Anzick.SG	blueviolet	21	California_SouthernChannelIslands_MH	USA_CA_SanNicolas_4800BP.SG	violet	23	362437	5886	61576	40719	NA	NA	NA	NA	390874	5043	77503	171204	404243	6649	60.8	53488
Mbuti	Anzick	AR0512	SouthernNorthAmerica_EH	USA_Anzick.SG	blueviolet	21	Uspallata	LH-MF|LH-F	goldenrod1	21	361097	3526	102416	849194	365147	4172	87523	167180	387259	4349	89054	3961182	390941	4512	86637	1246912
Mbuti	Anzick	OTT-1165	SouthernNorthAmerica_EH	USA_Anzick.SG	blueviolet	21	CentralAndes_LateIntermediate_LH	Peru_Ollantaytambo_LIP.Capt	orange1	13	360393	3606	99956	415108	359974	4758	75657	79991	NA	NA	NA	NA	NA	NA	NA	NA
Mbuti	Anzick	KMA-19-1	SouthernNorthAmerica_EH	USA_Anzick.SG	blueviolet	21	CentralAndes_LateHorizon_LH	Peru_Kanamarka3_LH.Capt	darkorange2	7	357902	3574	100135	653891	360341	442	81531	126405	NA	NA	NA	NA	NA	NA	NA	NA
Mbuti	Anzick	QKI-4	SouthernNorthAmerica_EH	USA_Anzick.SG	blueviolet	21	CentralAndes_LateHorizon_LH	Peru_Qotakalli2_LH.Capt	darkorange2	11	360696	3564	101213	540674	359384	4459	80603	104565	NA	NA	NA	NA	NA	NA	NA	NA
Mbuti	Anzick	KCA-1298	SouthernNorthAmerica_EH	USA_Anzick.SG	blueviolet	21	CentralAndes_LateHorizon_LH	Peru_Kusicancha1_LH.Capt	darkorange2	8	360516	3465	104044	554959	362278	452	80151	106912	NA	NA	NA	NA	NA	NA	NA	NA
Mbuti	Anzick	AR0519	SouthernNorthAmerica_EH	USA_Anzick.SG	blueviolet	21	Uspallata	LH-MF|LH-F	goldenrod1	21	360506	3349	107639	771114	363942	4091	88956	151872	386343	4254	90816	3558431	388588	4443	87.47	1120625
Mbuti	Anzick	AR0151	SouthernNorthAmerica_EH	USA_Anzick.SG	blueviolet	21	Uspallata	LH-HG|LH-HG	darkorange4	23	36273	3976	91232	275980	362449	5287	68.55	55376	387733	438	88517	1354820	386094	471	81975	432843
Mbuti	Anzick	AR0506	SouthernNorthAmerica_EH	USA_Anzick.SG	blueviolet	21	Uspallata	LH-MF|LH-F	goldenrod1	21	356619	3502	101836	436815	358131	4722	75841	84878	382092	4027	94878	1903837	38697	424	91266	592649
Mbuti	Anzick	AR0501	SouthernNorthAmerica_EH	USA_Anzick.SG	blueviolet	21	Uspallata	LH-MF|LH-F	goldenrod1	21	361965	3886	93.14	227227	364363	5727	63624	43959	389155	4551	85513	987051	395152	4861	81286	307904
Mbuti	Anzick	AR0180	SouthernNorthAmerica_EH	USA_Anzick.SG	blueviolet	21	Uspallata	LH-LF|LH-F	darkorange4	22	359031	4995	71885	80439	NA	NA	NA	NA	391442	4743	82535	386129	396472	5384	73644	123045
Mbuti	Anzick	Ala1	SouthernNorthAmerica_EH	USA_Anzick.SG	blueviolet	21	California_Central_LH	USA_CA_SanFranciscoBay_300BP.SG	palevioletred1	5	356701	3843	92828	271628	364095	5549	65.62	54331	378902	4351	87077	1261654	380604	461	82567	406900
Mbuti	Anzick	SC-04	SouthernNorthAmerica_EH	USA_Anzick.SG	blueviolet	21	California_SouthernChannelIslands_LH	USA_CA_SanClemente_900BP.SG	violet	7	357836	4109	87086	149361	NA	NA	NA	NA	381835	4374	87293	649084	386824	4811	80399	207763
Mbuti	Anzick	KCA-3089	SouthernNorthAmerica_EH	USA_Anzick.SG	blueviolet	21	CentralAndes_LateHorizon_LH	Peru_Kusicancha2_LH.Capt	darkorange2	9	361744	349	103.64	562086	361341	4514	80047	108410	NA	NA	NA	NA	NA	NA	NA	NA
Mbuti	Anzick	AR0149	SouthernNorthAmerica_EH	USA_Anzick.SG	blueviolet	21	Uspallata	LH-HG|LH-HG	darkorange4	23	360861	4229	85337	167541	NA	NA	NA	NA	383832	4527	84792	819716	385531	4969	77582	259376
Mbuti	Anzick	SN-15	SouthernNorthAmerica_EH	USA_Anzick.SG	blueviolet	21	California_SouthernChannelIslands_LH	USA_CA_SanNicolas_1600BP.SG	violet	8	361654	4111	87962	144701	NA	NA	NA	NA	384434	4554	84412	636670	387843	4977	77.92	203690
Mbuti	Anzick	PS-06	SouthernNorthAmerica_EH	USA_Anzick.SG	blueviolet	21	California_SouthernMainland_LH	USA_CA_PointSal_1500BP.SG	palevioletred3	2	359806	3527	102003	572921	362445	4591	78943	112021	385337	4266	90324	2440180	388875	4453	87321	767757
Mbuti	Anzick	SN-03	SouthernNorthAmerica_EH	USA_Anzick.SG	blueviolet	21	California_SouthernChannelIslands_LH	USA_CA_SanNicolas_1600BP.SG	violet	8	361146	4134	87.36	176268	NA	NA	NA	NA	386916	4561	84831	762264	389437	4906	79379	244923
Mbuti	Anzick	AR0504	SouthernNorthAmerica_EH	USA_Anzick.SG	blueviolet	21	Uspallata	LH-MF|LH-F	goldenrod1	21	356334	3477	102481	834591	362092	4216	85886	163903	382664	4287	89268	3813035	385768	4413	87423	1198225
Mbuti	Anzick	SHN-902	SouthernNorthAmerica_EH	USA_Anzick.SG	blueviolet	21	CentralAndes_LateHorizon_LH	Peru_Sacsahuaman2_LH.Capt	darkorange2	13	355151	3832	92679	225326	355799	5831	61021	42972	NA	NA	NA	NA	NA	NA	NA	NA
Mbuti	Anzick	PS-07	SouthernNorthAmerica_EH	USA_Anzick.SG	blueviolet	21	California_SouthernMainland_LH	USA_CA_PointSal_1500BP.SG	palevioletred3	2	361606	4	90409	170847	NA	NA	NA	NA	388622	4208	92.36	687820	390325	4702	83006	212918
Mbuti	Anzick	OTT-1144	SouthernNorthAmerica_EH	USA_Anzick.SG	blueviolet	21	CentralAndes_LateIntermediate_LH	Peru_Ollantaytambo_LIP.Capt	orange1	13	359681	3432	104797	570215	359545	4393	81852	110089	NA	NA	NA	NA	NA	NA	NA	NA
Mbuti	Anzick	SN-25	SouthernNorthAmerica_EH	USA_Anzick.SG	blueviolet	21	California_SouthernChannelIslands_MH	USA_CA_SanNicolas_4800BP.SG	violet	23	367144	5675	64698	44167	NA	NA	NA	NA	385296	5006	76.97	190092	394504	6145	64197	60861
Mbuti	Anzick	AR0526	SouthernNorthAmerica_EH	USA_Anzick.SG	blueviolet	21	Uspallata	LH-MF|LH-F	goldenrod1	21	358936	3375	106.35	680524	365622	4358	83.9	133565	386347	4278	90306	3062520	38907	4439	87644	964258
Mbuti	Anzick	AR0500and513	SouthernNorthAmerica_EH	USA_Anzick.SG	blueviolet	21	Uspallata	LH-MF|LH-F	goldenrod1	21	357852	3726	96042	391958	362225	5022	72127	76673	382947	435	88036	1756824	385573	4534	85037	550681
Mbuti	Anzick	AR0509	SouthernNorthAmerica_EH	USA_Anzick.SG	blueviolet	21	Uspallata	LH-MF|LH-F	goldenrod1	21	357197	3557	100411	669975	365042	4477	81543	131323	381761	4493	84.97	3048796	38601	4714	81886	958331
Mbuti	Anzick	AR0528	SouthernNorthAmerica_EH	USA_Anzick.SG	blueviolet	21	Uspallata	LH-MF|LH-F	goldenrod1	21	355311	3465	102546	479334	360233	4604	78236	93599	379367	4111	92278	2132808	382252	4262	89682	664836
Mbuti	Anzick	AR0521	SouthernNorthAmerica_EH	USA_Anzick.SG	blueviolet	21	Uspallata	LH-MF|LH-F	goldenrod1	21	362879	3427	105.89	560772	366727	4293	85417	109802	387088	4085	94757	2477714	391514	4212	92944	776619
Mbuti	Anzick	CCA-7-2	SouthernNorthAmerica_EH	USA_Anzick.SG	blueviolet	21	CentralAndes_LateHorizon_LH	Peru_CasaConcha2_LH.Capt	darkorange2	4	35806	3457	103579	657726	359247	4335	82862	127271	NA	NA	NA	NA	NA	NA	NA	NA
Mbuti	Anzick	SM-02	SouthernNorthAmerica_EH	USA_Anzick.SG	blueviolet	21	California_NorthernChannelIslands_LH	USA_CA_SanMiguel_650BP.SG	violet	1	362049	3567	101501	715203	370922	4391	84468	139989	389586	4243	91826	3167239	393133	4403	89284	995581
Mbuti	Anzick	SN-10	SouthernNorthAmerica_EH	USA_Anzick.SG	blueviolet	21	California_SouthernChannelIslands_LH	USA_CA_SanNicolas_1600BP.SG	violet	8	353445	4065	86948	186796	NA	NA	NA	NA	380576	4371	87075	775405	383722	4802	79903	242121
Mbuti	Anzick	F9	SouthernNorthAmerica_EH	USA_Anzick.SG	blueviolet	21	SouthernNorthAmerica_LH	Mexico_SierraTarahumara_PostClassic.SG	blueviolet	3	352562	3449	102.23	538334	352302	4403	80012	105377	379032	4082	92857	2632267	380232	4282	88801	817134
Mbuti	Anzick	SC-06	SouthernNorthAmerica_EH	USA_Anzick.SG	blueviolet	21	California_SouthernChannelIslands_LH	USA_CA_SanClemente_900BP.SG	violet	7	357914	449	79714	126235	NA	NA	NA	NA	383178	445	86116	533422	382816	491	77968	167794
Mbuti	Anzick	QKI-21-1	SouthernNorthAmerica_EH	USA_Anzick.SG	blueviolet	21	CentralAndes_LateHorizon_LH	Peru_Qotakalli1_LH.Capt	darkorange2	10	351352	4217	83313	129395	NA	NA	NA	NA	NA	NA	NA	NA	NA	NA	NA	NA
Mbuti	Anzick	OTT-1187	SouthernNorthAmerica_EH	USA_Anzick.SG	blueviolet	21	CentralAndes_LateIntermediate_LH	Peru_Ollantaytambo_LIP.Capt	orange1	13	354445	3575	99148	622002	35539	4524	78559	120625	NA	NA	NA	NA	NA	NA	NA	NA
Mbuti	Anzick	SN-16	SouthernNorthAmerica_EH	USA_Anzick.SG	blueviolet	21	California_SouthernChannelIslands_LH	USA_CA_SanNicolas_1600BP.SG	violet	8	357332	4399	81229	90930	NA	NA	NA	NA	383419	4316	88835	375247	386835	4936	78376	116832
Mbuti	Anzick	SN-17	SouthernNorthAmerica_EH	USA_Anzick.SG	blueviolet	21	California_SouthernChannelIslands_MH	USA_CA_SanNicolas_4800BP.SG	violet	23	361978	367	98644	745424	369232	4414	83646	147209	386887	4489	86193	3318497	389602	4621	84312	1058167
Mbuti	Anzick	SN-44	SouthernNorthAmerica_EH	USA_Anzick.SG	blueviolet	21	California_SouthernChannelIslands_MH	USA_CA_SanNicolas_4800BP.SG	violet	23	360656	358	100743	817891	365685	4291	85222	161176	385553	4418	87278	3705752	389012	455	85504	1174710
Mbuti	Anzick	SHN-575	SouthernNorthAmerica_EH	USA_Anzick.SG	blueviolet	21	CentralAndes_LateHorizon_LH	Peru_Sacsahuaman2_LH.Capt	darkorange2	13	361287	3515	102772	625403	361517	4397	82215	120892	NA	NA	NA	NA	NA	NA	NA	NA
Mbuti	Anzick	QKI-809	SouthernNorthAmerica_EH	USA_Anzick.SG	blueviolet	21	CentralAndes_LateHorizon_LH	Peru_Qotakalli1_LH.Capt	darkorange2	10	356142	3522	101.11	603192	35774	4353	82185	116991	NA	NA	NA	NA	NA	NA	NA	NA
Mbuti	Anzick	AR0520	SouthernNorthAmerica_EH	USA_Anzick.SG	blueviolet	21	Uspallata	LH-LFplc|LH-F	darkorange	22	359144	4015	89459	209598	366591	592	61919	41405	381716	4277	89249	949987	38657	4551	84946	301163
Mbuti	Anzick	OTT-1160	SouthernNorthAmerica_EH	USA_Anzick.SG	blueviolet	21	CentralAndes_LateIntermediate_LH	Peru_Ollantaytambo_LIP.Capt	orange1	13	35631	3503	101704	584664	357842	45	79516	112774	NA	NA	NA	NA	NA	NA	NA	NA
Mbuti	Anzick	KMA-15A-1	SouthernNorthAmerica_EH	USA_Anzick.SG	blueviolet	21	CentralAndes_LateHorizon_LH	Peru_Kanamarka1_LH.Capt	darkorange2	5	360499	3515	102575	675563	362427	4266	84947	130970	NA	NA	NA	NA	NA	NA	NA	NA
Mbuti	Anzick	AR0508	SouthernNorthAmerica_EH	USA_Anzick.SG	blueviolet	21	Uspallata	LH-MF|LH-F	goldenrod1	21	360111	3482	103424	460295	364474	4697	77603	89515	387598	4115	94197	2036700	390623	4363	89526	635600
Mbuti	Anzick	QKI-9-3	SouthernNorthAmerica_EH	USA_Anzick.SG	blueviolet	21	CentralAndes_LateHorizon_LH	Peru_Qotakalli1_LH.Capt	darkorange2	10	36082	3517	102578	414692	359229	4827	74413	79235	NA	NA	NA	NA	NA	NA	NA	NA
Mbuti	Anzick	OTT-1174	SouthernNorthAmerica_EH	USA_Anzick.SG	blueviolet	21	CentralAndes_LateIntermediate_LH	Peru_Ollantaytambo_LIP.Capt	orange1	13	358226	3645	98285	457582	35554	486	73153	88100	NA	NA	NA	NA	NA	NA	NA	NA
Mbuti	Anzick	B-03	SouthernNorthAmerica_EH	USA_Anzick.SG	blueviolet	21	California_Baja_LH	Mexico_Pericues_Unknown.SG	palevioletred1	4	354997	3805	93304	197392	351146	5772	60.84	38671	379475	4309	88062	852312	382277	4726	80882	268819
Mbuti	Anzick	SN-39	SouthernNorthAmerica_EH	USA_Anzick.SG	blueviolet	21	California_SouthernChannelIslands_MH	USA_CA_SanNicolas_4800BP.SG	violet	23	354909	4119	86154	150747	NA	NA	NA	NA	386702	4521	85539	630080	387802	4983	77831	198950
Mbuti	Anzick	SN-01	SouthernNorthAmerica_EH	USA_Anzick.SG	blueviolet	21	California_SouthernChannelIslands_LH	USA_CA_SanNicolas_1600BP.SG	violet	8	360015	4971	72427	71734	NA	NA	NA	NA	383504	4554	84207	299410	383857	5333	71972	94404
Mbuti	Anzick	SN_50	SouthernNorthAmerica_EH	USA_Anzick.SG	blueviolet	21	California_SouthernChannelIslands_LH	USA_CA_SanNicolas_1600BP.SG	violet	8	357606	3757	95184	306778	35783	5383	66471	59683	382408	4227	90476	1307278	38417	4514	85111	409479
Mbuti	Anzick	SHN-212	SouthernNorthAmerica_EH	USA_Anzick.SG	blueviolet	21	CentralAndes_LateHorizon_LH	Peru_Sacsahuaman1_LH.Capt	darkorange2	12	354786	4459	79557	87321	NA	NA	NA	NA	NA	NA	NA	NA	NA	NA	NA	NA
Mbuti	Anzick	KMA-28-1	SouthernNorthAmerica_EH	USA_Anzick.SG	blueviolet	21	CentralAndes_LateHorizon_LH	Peru_Kanamarka1_LH.Capt	darkorange2	5	354121	3371	105046	651463	35769	4228	84.61	126499	NA	NA	NA	NA	NA	NA	NA	NA
Mbuti	Anzick	CCA-5-1	SouthernNorthAmerica_EH	USA_Anzick.SG	blueviolet	21	CentralAndes_LateHorizon_LH	Peru_CasaConcha2_LH.Capt	darkorange2	4	358722	3383	106047	637394	360279	4188	86017	123705	NA	NA	NA	NA	NA	NA	NA	NA
Mbuti	Anzick	SM-01	SouthernNorthAmerica_EH	USA_Anzick.SG	blueviolet	21	California_NorthernChannelIslands_LH	USA_CA_SanMiguel_650BP.SG	violet	1	35844	4788	74857	77891	NA	NA	NA	NA	383033	4796	79.86	326871	385974	5394	71559	102140
Mbuti	Anzick	SHN-492	SouthernNorthAmerica_EH	USA_Anzick.SG	blueviolet	21	CentralAndes_LateHorizon_LH	Peru_Sacsahuaman3_LH.Capt	darkorange2	14	353532	361	97942	445976	35505	4773	74382	85543	NA	NA	NA	NA	NA	NA	NA	NA
Mbuti	Anzick	E8CdV	SouthernNorthAmerica_EH	USA_Anzick.SG	blueviolet	21	CentralAmerica_LH	Mexico_CanadaDeLaVirgen_MidClassic.SG	darkviolet	2	358737	3869	92732	220248	359394	6378	56353	42865	383207	4226	90685	1255830	382667	4435	86285	385089
Mbuti	Anzick	SN-11	SouthernNorthAmerica_EH	USA_Anzick.SG	blueviolet	21	California_SouthernChannelIslands_LH	USA_CA_SanNicolas_1600BP.SG	violet	8	352103	3354	104973	720957	359167	4202	85471	141920	376472	4038	93231	3223334	380977	4198	90758	1025106
Mbuti	Anzick	SN-13	SouthernNorthAmerica_EH	USA_Anzick.SG	blueviolet	21	California_SouthernChannelIslands_LH	USA_CA_SanNicolas_1600BP.SG	violet	8	353557	3559	99333	385751	353984	4846	73045	74960	378523	429	88229	1643890	383161	4557	84.09	515286
Mbuti	Anzick	333B	SouthernNorthAmerica_EH	USA_Anzick.SG	blueviolet	21	CentralAmerica_LH	Mexico_SierraGorda_Postclassic.SG	darkviolet	3	360989	3491	103.41	714896	364926	436	83704	139965	385099	4236	90908	3449337	387147	4347	89066	1075413
Mbuti	Anzick	SN-32	SouthernNorthAmerica_EH	USA_Anzick.SG	blueviolet	21	California_SouthernChannelIslands_MH	USA_CA_SanNicolas_4800BP.SG	violet	23	361963	4815	75176	79084	NA	NA	NA	NA	387034	4491	86.18	335354	391701	5373	72903	105779
Mbuti	Anzick	SHN-355	SouthernNorthAmerica_EH	USA_Anzick.SG	blueviolet	21	CentralAndes_LateHorizon_LH	Peru_Sacsahuaman2_LH.Capt	darkorange2	13	357577	3482	102706	547519	357079	4488	79561	106342	NA	NA	NA	NA	NA	NA	NA	NA
Mbuti	Anzick	AR0505	SouthernNorthAmerica_EH	USA_Anzick.SG	blueviolet	21	Uspallata	LH-MF|LH-F	goldenrod1	21	358927	3518	102016	828059	365174	4294	85044	162423	385017	4468	86172	3777007	388266	4645	83591	1181544
Mbuti	Anzick	KCA-1108	SouthernNorthAmerica_EH	USA_Anzick.SG	blueviolet	21	CentralAndes_LateHorizon_LH	Peru_Kusicancha1_LH.Capt	darkorange2	8	354792	3507	101172	576204	360006	4368	82416	110827	NA	NA	NA	NA	NA	NA	NA	NA
Mbuti	Anzick	2417Q	SouthernNorthAmerica_EH	USA_Anzick.SG	blueviolet	21	CentralAmerica_LH	Mexico_SierraGorda_Terminalclassic.SG	darkviolet	4	357515	3543	100896	844707	362268	4262	85	166781	379998	4259	89.23	4175032	380918	4401	86556	1307921
Mbuti	Anzick	SC-05	SouthernNorthAmerica_EH	USA_Anzick.SG	blueviolet	21	California_SouthernChannelIslands_LH	USA_CA_SanClemente_900BP.SG	violet	7	351939	333	105673	835878	358444	4243	84471	164268	378455	4084	92676	3790350	382789	4245	90169	1190577
Mbuti	Anzick	AR0510	SouthernNorthAmerica_EH	USA_Anzick.SG	blueviolet	21	Uspallata	LH-MF|LH-F	goldenrod1	21	356904	3479	102601	758160	362599	4179	86761	149177	382802	4357	87859	3518419	385354	4517	85313	1108448
Mbuti	Anzick	AR0527	SouthernNorthAmerica_EH	USA_Anzick.SG	blueviolet	21	Uspallata	LH-MF|LH-F	goldenrod1	21	357463	3551	100.67	511566	359401	4515	79602	99902	383594	4232	90648	2244628	386969	4412	87711	700768
Mbuti	Anzick	CR-01	SouthernNorthAmerica_EH	USA_Anzick.SG	blueviolet	21	California_NorthernChannelIslands_LH	USA_CA_SantaCruz_1000BP.SG	violet	2	359471	3353	107195	811251	362159	4138	87527	159833	386135	4133	93.43	3684782	389056	4268	91.16	1167774
Mbuti	Anzick	2417J	SouthernNorthAmerica_EH	USA_Anzick.SG	blueviolet	21	CentralAmerica_LH	Mexico_SierraGorda_Postclassic.SG	darkviolet	3	355289	336	105731	601541	359564	4383	82.03	118253	37916	4005	94666	2871279	380889	4173	91284	897963
Mbuti	Anzick	PS-03	SouthernNorthAmerica_EH	USA_Anzick.SG	blueviolet	21	California_SouthernMainland_LH	USA_CA_PointSal_1500BP.SG	palevioletred3	2	362421	4798	75531	77743	NA	NA	NA	NA	389446	4729	82353	329259	392732	5396	72778	104253
Mbuti	Anzick	AR0152	SouthernNorthAmerica_EH	USA_Anzick.SG	blueviolet	21	Uspallata	LH-HG|LH-HG	darkorange4	23	360904	4404	81957	108492	NA	NA	NA	NA	385877	4797	80449	529913	388676	535	72644	169119
Mbuti	Anzick	AR0514	SouthernNorthAmerica_EH	USA_Anzick.SG	blueviolet	21	Uspallata	LH-MF|LH-F	goldenrod1	21	355995	3577	99.51	462384	357515	4659	76737	90640	38324	4219	90.83	2038853	385199	438	87936	642242
Mbuti	Anzick	SC-01	SouthernNorthAmerica_EH	USA_Anzick.SG	blueviolet	21	California_SouthernChannelIslands_LH	USA_CA_SanClemente_900BP.SG	violet	7	352351	4126	85399	150587	NA	NA	NA	NA	377238	4388	85975	646710	37735	4893	77114	205745
Mbuti	Anzick	SN-53	SouthernNorthAmerica_EH	USA_Anzick.SG	blueviolet	21	California_SouthernChannelIslands_LH	USA_CA_SanNicolas_1600BP.SG	violet	8	358206	3817	93852	200490	356483	606	58822	39051	386413	4382	88181	843321	389355	4829	80636	262401
Mbuti	Anzick	SN-38	SouthernNorthAmerica_EH	USA_Anzick.SG	blueviolet	21	California_SouthernChannelIslands_LH	USA_CA_SanNicolas_1600BP.SG	violet	8	352497	5031	70067	62166	NA	NA	NA	NA	379469	4646	81683	263186	38471	546	70458	83316
Mbuti	AR0149	AR0508	Uspallata	LH-HG|LH-HG	darkorange4	23	Uspallata	LH-MF|LH-F	goldenrod1	21	390647	4844	80648	89612	NA	NA	NA	NA	418138	4521	92484	397460	416481	5175	80479	124984
Mbuti	AR0149	AR0505	Uspallata	LH-HG|LH-HG	darkorange4	23	Uspallata	LH-MF|LH-F	goldenrod1	21	391022	4321	90484	161139	NA	NA	NA	NA	415885	4722	88066	734901	415087	5114	81166	231745
Mbuti	AR0149	AR0151	Uspallata	LH-HG|LH-HG	darkorange4	23	Uspallata	LH-HG|LH-HG	darkorange4	23	403172	5409	74537	55389	NA	NA	NA	NA	431378	5018	85974	275787	428149	5799	73826	89115
Mbuti	AR0149	AR0518	Uspallata	LH-HG|LH-HG	darkorange4	23	Uspallata	LH-MF|LH-F	goldenrod1	21	39698	4459	89031	151750	NA	NA	NA	NA	419181	4553	92077	709827	416268	4872	85437	225913
Mbuti	AR0149	AR0506	Uspallata	LH-HG|LH-HG	darkorange4	23	Uspallata	LH-MF|LH-F	goldenrod1	21	387567	4838	80105	84459	NA	NA	NA	NA	418823	4521	92633	370025	41938	5278	79457	115903
Mbuti	AR0149	AR0500and513	Uspallata	LH-HG|LH-HG	darkorange4	23	Uspallata	LH-MF|LH-F	goldenrod1	21	391803	4986	78578	76321	NA	NA	NA	NA	4134	4621	89452	344298	413849	5196	79.65	109327
Mbuti	AR0149	AR0526	Uspallata	LH-HG|LH-HG	darkorange4	23	Uspallata	LH-MF|LH-F	goldenrod1	21	388695	4428	87783	132371	NA	NA	NA	NA	416858	453	92032	598747	417732	5012	83339	189973
Mbuti	AR0149	AR0521	Uspallata	LH-HG|LH-HG	darkorange4	23	Uspallata	LH-MF|LH-F	goldenrod1	21	391378	4479	87378	108906	NA	NA	NA	NA	41297	4457	92655	482762	414273	4921	84181	152631
Mbuti	AR0149	AR0517	Uspallata	LH-HG|LH-HG	darkorange4	23	Uspallata	LH-MFout|LH-F	goldenrod1	23	384422	5258	73112	52100	NA	NA	NA	NA	404805	4553	88901	225705	40855	5309	76957	71763
Mbuti	AR0149	AR0520	Uspallata	LH-HG|LH-HG	darkorange4	23	Uspallata	LH-LFplc|LH-F	darkorange	22	376443	5952	63245	41172	NA	NA	NA	NA	406163	4735	85778	188616	401515	5715	70253	60758
Mbuti	AR0149	AR0504	Uspallata	LH-HG|LH-HG	darkorange4	23	Uspallata	LH-MF|LH-F	goldenrod1	21	390251	4144	94168	162754	NA	NA	NA	NA	412079	4366	94378	746163	413754	4686	88286	236359
Mbuti	AR0149	AR0519	Uspallata	LH-HG|LH-HG	darkorange4	23	Uspallata	LH-MF|LH-F	goldenrod1	21	392307	4334	90529	150315	NA	NA	NA	NA	418824	4549	92.06	697371	417489	4968	84036	221636
Mbuti	AR0149	AR0180	Uspallata	LH-HG|LH-HG	darkorange4	23	Uspallata	LH-LF|LH-F	darkorange4	22	400486	8806	45479	16238	NA	NA	NA	NA	425582	5942	71619	78492	434183	8012	54192	25133
Mbuti	AR0149	AR0152	Uspallata	LH-HG|LH-HG	darkorange4	23	Uspallata	LH-HG|LH-HG	darkorange4	23	38331	7584	50543	21632	NA	NA	NA	NA	41017	5381	76229	107749	392907	7045	55767	34879
Mbuti	AR0149	AR0528	Uspallata	LH-HG|LH-HG	darkorange4	23	Uspallata	LH-MF|LH-F	goldenrod1	21	389963	4761	81905	92525	NA	NA	NA	NA	417081	4626	90163	414590	4123	5137	80268	130609
Mbuti	AR0149	AR0509	Uspallata	LH-HG|LH-HG	darkorange4	23	Uspallata	LH-MF|LH-F	goldenrod1	21	396531	4273	92804	130749	NA	NA	NA	NA	419667	4433	94677	598838	420557	4897	85.88	190047
Mbuti	AR0149	AR0527	Uspallata	LH-HG|LH-HG	darkorange4	23	Uspallata	LH-MF|LH-F	goldenrod1	21	391392	4646	84248	99206	NA	NA	NA	NA	417129	4681	89112	435353	420233	5196	80881	137205
Mbuti	AR0149	AR0510	Uspallata	LH-HG|LH-HG	darkorange4	23	Uspallata	LH-MF|LH-F	goldenrod1	21	390539	4332	90158	148089	NA	NA	NA	NA	413745	4607	89816	690676	411296	5028	81.8	219497
Mbuti	AR0149	AR0514	Uspallata	LH-HG|LH-HG	darkorange4	23	Uspallata	LH-MF|LH-F	goldenrod1	21	385905	4832	79867	90261	NA	NA	NA	NA	413183	4726	87432	400984	413533	5287	78224	126933
Mbuti	AR0149	AR0512	Uspallata	LH-HG|LH-HG	darkorange4	23	Uspallata	LH-MF|LH-F	goldenrod1	21	391587	4242	92318	165765	NA	NA	NA	NA	416832	4604	90532	775152	413957	5041	82125	246100
Mbuti	AR0149	AR0162	Uspallata	LH-HG|LH-HG	darkorange4	23	Uspallata	LH-LF|LH-F	darkorange4	21	390208	4678	83413	109147	NA	NA	NA	NA	414602	4558	90967	483466	410691	5065	81079	153740
Mbuti	AR0149	AR0501	Uspallata	LH-HG|LH-HG	darkorange4	23	Uspallata	LH-MF|LH-F	goldenrod1	21	395369	5737	68911	43819	NA	NA	NA	NA	421895	4866	86706	192672	424269	6038	70.27	60659
Mbuti	AR0151	AR0518	Uspallata	LH-HG|LH-HG	darkorange4	23	Uspallata	LH-MF|LH-F	goldenrod1	21	391314	3895	100471	250303	388013	5658	68576	50159	416628	4599	90601	1179332	413396	4792	86272	378279
Mbuti	AR0151	AR0514	Uspallata	LH-HG|LH-HG	darkorange4	23	Uspallata	LH-MF|LH-F	goldenrod1	21	388055	4166	93156	148422	383848	6738	56965	29480	419995	4542	92469	664818	416364	5011	83094	212898
Mbuti	AR0151	AR0500and513	Uspallata	LH-HG|LH-HG	darkorange4	23	Uspallata	LH-MF|LH-F	goldenrod1	21	389028	4331	89831	125546	389083	7161	54334	24938	417059	4617	90331	569420	413742	5121	80793	181556
Mbuti	AR0151	AR0520	Uspallata	LH-HG|LH-HG	darkorange4	23	Uspallata	LH-LFplc|LH-F	darkorange	22	387276	5289	73217	68309	393162	9176	42845	13787	409291	4577	89426	314699	409737	5175	79178	101566
Mbuti	AR0151	AR0526	Uspallata	LH-HG|LH-HG	darkorange4	23	Uspallata	LH-MF|LH-F	goldenrod1	21	393319	3838	102468	217960	39578	5848	67677	43499	423369	4397	96297	993613	423079	465	90987	318590
Mbuti	AR0151	AR0506	Uspallata	LH-HG|LH-HG	darkorange4	23	Uspallata	LH-MF|LH-F	goldenrod1	21	386039	4213	91636	138610	382381	6952	55	27555	41466	4441	93372	609510	413332	4771	86641	192856
Mbuti	AR0151	AR0528	Uspallata	LH-HG|LH-HG	darkorange4	23	Uspallata	LH-MF|LH-F	goldenrod1	21	385433	4039	95.42	152806	380292	6217	61165	30516	415709	4384	94822	684969	412779	4743	87021	216989
Mbuti	AR0151	AR0508	Uspallata	LH-HG|LH-HG	darkorange4	23	Uspallata	LH-MF|LH-F	goldenrod1	21	393546	4381	89839	147005	395937	6727	58858	29144	41975	4593	91.39	656033	418684	5035	83158	208580
Mbuti	AR0151	AR0504	Uspallata	LH-HG|LH-HG	darkorange4	23	Uspallata	LH-MF|LH-F	goldenrod1	21	387281	3738	103601	267936	389253	5403	72048	53616	417444	4078	102368	1237708	41472	4329	95.79	396013
Mbuti	AR0151	AR0162	Uspallata	LH-HG|LH-HG	darkorange4	23	Uspallata	LH-LF|LH-F	darkorange4	21	390686	4246	92007	179338	388132	6387	60768	35794	420266	4534	92699	800639	41859	4846	86374	256558
Mbuti	AR0151	AR0505	Uspallata	LH-HG|LH-HG	darkorange4	23	Uspallata	LH-MF|LH-F	goldenrod1	21	389184	3786	102795	265161	391389	5599	69901	52981	418278	4312	97005	1217426	417942	4484	93211	387170
Mbuti	AR0151	AR0527	Uspallata	LH-HG|LH-HG	darkorange4	23	Uspallata	LH-MF|LH-F	goldenrod1	21	387519	4122	94003	162342	382279	611	62563	32213	419906	4485	93621	717355	418796	4767	87846	227377
Mbuti	AR0151	AR0501	Uspallata	LH-HG|LH-HG	darkorange4	23	Uspallata	LH-MF|LH-F	goldenrod1	21	393595	4826	81549	72531	394534	8996	43857	14142	422919	4528	93408	319400	421238	5224	80637	101450
Mbuti	AR0151	AR0152	Uspallata	LH-HG|LH-HG	darkorange4	23	Uspallata	LH-HG|LH-HG	darkorange4	23	394724	6504	60689	36069	NA	NA	NA	NA	424727	5204	81.62	180410	422691	6037	70021	58728
Mbuti	AR0151	AR0517	Uspallata	LH-HG|LH-HG	darkorange4	23	Uspallata	LH-MFout|LH-F	goldenrod1	23	380445	4565	83334	85896	377371	8062	46808	17193	406607	4506	90244	373670	408686	5056	80827	120074
Mbuti	AR0151	AR0519	Uspallata	LH-HG|LH-HG	darkorange4	23	Uspallata	LH-MF|LH-F	goldenrod1	21	392438	3847	102015	247508	387989	5587	69442	49733	419436	4489	93441	1156906	417149	4833	86304	370929
Mbuti	AR0151	AR0521	Uspallata	LH-HG|LH-HG	darkorange4	23	Uspallata	LH-MF|LH-F	goldenrod1	21	387224	3918	98836	178896	388424	6405	60644	35675	417553	4299	97124	798315	41711	4732	88146	254442
Mbuti	AR0151	AR0512	Uspallata	LH-HG|LH-HG	darkorange4	23	Uspallata	LH-MF|LH-F	goldenrod1	21	388713	3637	106866	273055	385102	5379	71592	54806	419857	4197	100044	1286608	418987	4402	95186	412330
Mbuti	AR0151	AR0510	Uspallata	LH-HG|LH-HG	darkorange4	23	Uspallata	LH-MF|LH-F	goldenrod1	21	395581	3808	103881	243610	397548	6004	66212	48892	420334	4239	99149	1146113	418611	4412	94.89	367760
Mbuti	AR0151	AR0180	Uspallata	LH-HG|LH-HG	darkorange4	23	Uspallata	LH-LF|LH-F	darkorange4	22	39142	6542	59832	27286	NA	NA	NA	NA	418342	5256	79595	133511	415896	6825	60941	43467
Mbuti	AR0151	AR0509	Uspallata	LH-HG|LH-HG	darkorange4	23	Uspallata	LH-MF|LH-F	goldenrod1	21	390066	3877	100619	214979	394403	5846	67464	42824	418777	4383	95549	992300	415721	4746	87587	317567
Mbuti	AR0152	AR0514	Uspallata	LH-HG|LH-HG	darkorange4	23	Uspallata	LH-MF|LH-F	goldenrod1	21	392227	5073	77313	58416	NA	NA	NA	NA	419379	4699	89239	259928	420701	5624	74806	82912
Mbuti	AR0152	AR0506	Uspallata	LH-HG|LH-HG	darkorange4	23	Uspallata	LH-MF|LH-F	goldenrod1	21	394434	5553	71033	54392	NA	NA	NA	NA	423909	4702	90.16	238619	423845	5614	75496	75475
Mbuti	AR0152	AR0512	Uspallata	LH-HG|LH-HG	darkorange4	23	Uspallata	LH-MF|LH-F	goldenrod1	21	39031	4546	85866	107364	NA	NA	NA	NA	42213	4538	93019	503286	420715	5108	82368	161176
Mbuti	AR0152	AR0162	Uspallata	LH-HG|LH-HG	darkorange4	23	Uspallata	LH-LF|LH-F	darkorange4	21	395348	5145	76847	70706	NA	NA	NA	NA	425646	4448	95686	313168	426316	54	78955	100500
Mbuti	AR0152	AR0501	Uspallata	LH-HG|LH-HG	darkorange4	23	Uspallata	LH-MF|LH-F	goldenrod1	21	398981	6784	58811	28604	NA	NA	NA	NA	434477	5417	80206	124862	435872	6782	64266	39688
Mbuti	AR0152	AR0526	Uspallata	LH-HG|LH-HG	darkorange4	23	Uspallata	LH-MF|LH-F	goldenrod1	21	396433	4699	84367	85620	NA	NA	NA	NA	424715	4603	92273	388815	425737	5219	81578	124383
Mbuti	AR0152	AR0505	Uspallata	LH-HG|LH-HG	darkorange4	23	Uspallata	LH-MF|LH-F	goldenrod1	21	389704	4671	83433	104383	NA	NA	NA	NA	420578	4566	92106	476820	422372	5109	82676	151540
Mbuti	AR0152	AR0517	Uspallata	LH-HG|LH-HG	darkorange4	23	Uspallata	LH-MFout|LH-F	goldenrod1	23	38033	6388	59.54	33483	NA	NA	NA	NA	410194	5016	81773	146876	407128	646	63021	47183
Mbuti	AR0152	AR0528	Uspallata	LH-HG|LH-HG	darkorange4	23	Uspallata	LH-MF|LH-F	goldenrod1	21	390184	5296	73677	60122	NA	NA	NA	NA	424037	4844	87532	267994	418626	5418	77261	84947
Mbuti	AR0152	AR0520	Uspallata	LH-HG|LH-HG	darkorange4	23	Uspallata	LH-LFplc|LH-F	darkorange	22	39804	699	56945	26669	NA	NA	NA	NA	419821	4976	84375	122995	415677	6316	65813	39503
Mbuti	AR0152	AR0527	Uspallata	LH-HG|LH-HG	darkorange4	23	Uspallata	LH-MF|LH-F	goldenrod1	21	40187	5202	77254	64027	NA	NA	NA	NA	429824	4714	91176	280889	431194	5375	80216	89051
Mbuti	AR0152	AR0508	Uspallata	LH-HG|LH-HG	darkorange4	23	Uspallata	LH-MF|LH-F	goldenrod1	21	391687	5494	71299	57598	NA	NA	NA	NA	42166	4874	86.52	255787	419705	572	73373	81254
Mbuti	AR0152	AR0518	Uspallata	LH-HG|LH-HG	darkorange4	23	Uspallata	LH-MF|LH-F	goldenrod1	21	399206	4889	81648	98537	NA	NA	NA	NA	42759	4839	88368	461491	428437	5405	79266	148062
Mbuti	AR0152	AR0521	Uspallata	LH-HG|LH-HG	darkorange4	23	Uspallata	LH-MF|LH-F	goldenrod1	21	397595	5253	75.69	70465	NA	NA	NA	NA	429022	4559	94114	312631	427815	5264	81274	99534
Mbuti	AR0152	AR0180	Uspallata	LH-HG|LH-HG	darkorange4	23	Uspallata	LH-LF|LH-F	darkorange4	22	397831	10081	39464	10640	NA	NA	NA	NA	431356	6657	64797	51691	441152	945	46683	16756
Mbuti	AR0152	AR0510	Uspallata	LH-HG|LH-HG	darkorange4	23	Uspallata	LH-MF|LH-F	goldenrod1	21	400642	4822	83081	95810	NA	NA	NA	NA	429197	4561	94099	447589	425547	514	82788	143398
Mbuti	AR0152	AR0509	Uspallata	LH-HG|LH-HG	darkorange4	23	Uspallata	LH-MF|LH-F	goldenrod1	21	405474	4835	83859	84510	NA	NA	NA	NA	430671	4696	91701	387768	430605	5235	82253	124050
Mbuti	AR0152	AR0504	Uspallata	LH-HG|LH-HG	darkorange4	23	Uspallata	LH-MF|LH-F	goldenrod1	21	395121	4648	85003	105360	NA	NA	NA	NA	422708	4632	91256	483919	421994	5079	83092	154525
Mbuti	AR0152	AR0500and513	Uspallata	LH-HG|LH-HG	darkorange4	23	Uspallata	LH-MF|LH-F	goldenrod1	21	401688	5634	71299	49405	NA	NA	NA	NA	429666	4917	87386	223196	424841	5921	71751	71002
Mbuti	AR0152	AR0519	Uspallata	LH-HG|LH-HG	darkorange4	23	Uspallata	LH-MF|LH-F	goldenrod1	21	397097	4809	82575	97255	NA	NA	NA	NA	424445	4555	93189	452108	424095	5149	82364	144876
Mbuti	AR0162	AR0527	Uspallata	LH-LF|LH-F	darkorange4	21	Uspallata	LH-MF|LH-F	goldenrod1	21	39933	3854	103614	337441	402581	5395	74625	65867	431226	4351	99114	1391454	435149	4583	94945	435410
Mbuti	AR0162	AR0509	Uspallata	LH-LF|LH-F	darkorange4	21	Uspallata	LH-MF|LH-F	goldenrod1	21	395789	3769	105023	440274	400865	5015	79934	86263	427605	4276	99991	1866136	430068	4499	95584	587558
Mbuti	AR0162	AR0514	Uspallata	LH-LF|LH-F	darkorange4	21	Uspallata	LH-MF|LH-F	goldenrod1	21	395915	3889	101814	304233	397374	5298	75006	59623	428306	4356	98315	1265694	430468	4545	94.72	398659
Mbuti	AR0162	AR0504	Uspallata	LH-LF|LH-F	darkorange4	21	Uspallata	LH-MF|LH-F	goldenrod1	21	391337	364	107511	546481	394878	4545	86875	107173	426233	4199	101509	2332646	429808	4323	99414	734869
Mbuti	AR0162	AR0517	Uspallata	LH-LF|LH-F	darkorange4	21	Uspallata	LH-MFout|LH-F	goldenrod1	23	382807	3905	98019	175782	387294	6268	61785	34321	413007	4177	98871	716683	416587	4641	89.76	225928
Mbuti	AR0162	AR0510	Uspallata	LH-LF|LH-F	darkorange4	21	Uspallata	LH-MF|LH-F	goldenrod1	21	392548	3769	104145	496801	395464	4902	80679	97652	423049	4288	98657	2134637	42674	4453	95825	674204
Mbuti	AR0162	AR0521	Uspallata	LH-LF|LH-F	darkorange4	21	Uspallata	LH-MF|LH-F	goldenrod1	21	399444	3781	105643	369245	398539	5155	77311	72111	430855	4125	104449	1533103	434356	4335	100187	480959
Mbuti	AR0162	AR0506	Uspallata	LH-LF|LH-F	darkorange4	21	Uspallata	LH-MF|LH-F	goldenrod1	21	398411	3713	107306	288568	400229	544	73567	56045	430588	4184	102922	1185883	433123	4502	96215	369369
Mbuti	AR0162	AR0519	Uspallata	LH-LF|LH-F	darkorange4	21	Uspallata	LH-MF|LH-F	goldenrod1	21	395632	3797	104196	505271	398907	4912	81215	99198	426493	4473	95352	2165955	430531	4673	92132	683393
Mbuti	AR0162	AR0518	Uspallata	LH-LF|LH-F	darkorange4	21	Uspallata	LH-MF|LH-F	goldenrod1	21	399078	3879	102.89	509129	404193	4841	83.5	100038	430901	4413	97639	2194929	432157	4546	95071	693366
Mbuti	AR0162	AR0512	Uspallata	LH-LF|LH-F	darkorange4	21	Uspallata	LH-MF|LH-F	goldenrod1	21	397204	3692	107585	555314	397417	4694	84656	109167	430128	445	96652	2402244	431807	4572	94436	758663
Mbuti	AR0162	AR0520	Uspallata	LH-LF|LH-F	darkorange4	21	Uspallata	LH-LFplc|LH-F	darkorange	22	386055	4379	88162	137286	3906	7091	55085	27144	41427	4278	96.83	583154	415739	476	87342	185126
Mbuti	AR0162	AR0508	Uspallata	LH-LF|LH-F	darkorange4	21	Uspallata	LH-MF|LH-F	goldenrod1	21	397208	3862	102853	303913	401224	5316	75.47	58960	429825	4244	101288	1261394	433424	4527	95.74	394436
Mbuti	AR0162	AR0528	Uspallata	LH-LF|LH-F	darkorange4	21	Uspallata	LH-MF|LH-F	goldenrod1	21	392155	3934	99672	316943	396054	5314	74525	61695	425602	4178	101872	1318902	427891	442	96808	411761
Mbuti	AR0162	AR0526	Uspallata	LH-LF|LH-F	darkorange4	21	Uspallata	LH-MF|LH-F	goldenrod1	21	393286	3827	102779	446862	401517	4886	82178	87615	426209	4452	95.73	1883063	429479	4568	94017	593699
Mbuti	AR0162	AR0505	Uspallata	LH-LF|LH-F	darkorange4	21	Uspallata	LH-MF|LH-F	goldenrod1	21	397872	3838	103673	542368	402556	4837	83228	106196	431359	4559	94618	2307041	436295	474	92052	724101
Mbuti	AR0162	AR0501	Uspallata	LH-LF|LH-F	darkorange4	21	Uspallata	LH-MF|LH-F	goldenrod1	21	40219	4332	92831	150161	404816	68	59533	28970	435268	4467	97448	617219	437483	4954	88307	192812
Mbuti	AR0162	AR0180	Uspallata	LH-LF|LH-F	darkorange4	21	Uspallata	LH-LF|LH-F	darkorange4	22	388356	555	69974	52507	NA	NA	NA	NA	426827	4969	85898	231323	42532	5959	71.38	74129
Mbuti	AR0162	AR0500and513	Uspallata	LH-LF|LH-F	darkorange4	21	Uspallata	LH-MF|LH-F	goldenrod1	21	394819	3963	99629	258339	390022	5577	69937	50617	425439	4333	98196	1081781	426434	4701	90707	339533
Mbuti	AR0180	AR0500and513	Uspallata	LH-LF|LH-F	darkorange4	22	Uspallata	LH-MF|LH-F	goldenrod1	21	395282	6241	63333	36826	NA	NA	NA	NA	422951	5371	78753	164116	425234	6498	65441	52220
Mbuti	AR0180	AR0512	Uspallata	LH-LF|LH-F	darkorange4	22	Uspallata	LH-MF|LH-F	goldenrod1	21	392387	5017	78213	79616	NA	NA	NA	NA	427906	5025	85.15	369584	425442	5647	75335	118165
Mbuti	AR0180	AR0521	Uspallata	LH-LF|LH-F	darkorange4	22	Uspallata	LH-MF|LH-F	goldenrod1	21	396456	5523	71789	52312	NA	NA	NA	NA	42312	4754	89006	230790	428177	5832	73425	73259
Mbuti	AR0180	AR0501	Uspallata	LH-LF|LH-F	darkorange4	22	Uspallata	LH-MF|LH-F	goldenrod1	21	38754	7507	51621	21208	NA	NA	NA	NA	425618	558	76282	92653	432995	7538	57439	29405
Mbuti	AR0180	AR0505	Uspallata	LH-LF|LH-F	darkorange4	22	Uspallata	LH-MF|LH-F	goldenrod1	21	391258	4894	79953	77520	NA	NA	NA	NA	424878	4863	87367	351249	426779	5606	76129	111423
Mbuti	AR0180	AR0517	Uspallata	LH-LF|LH-F	darkorange4	22	Uspallata	LH-MFout|LH-F	goldenrod1	23	38625	6943	55635	25279	NA	NA	NA	NA	412141	5356	76947	108628	414763	7449	55682	35021
Mbuti	AR0180	AR0506	Uspallata	LH-LF|LH-F	darkorange4	22	Uspallata	LH-MF|LH-F	goldenrod1	21	401675	6057	66311	40592	NA	NA	NA	NA	425945	4892	87063	176350	424653	59	71981	55813
Mbuti	AR0180	AR0504	Uspallata	LH-LF|LH-F	darkorange4	22	Uspallata	LH-MF|LH-F	goldenrod1	21	394042	4962	79406	78106	NA	NA	NA	NA	426284	4784	89.11	356498	424537	5411	78456	113652
Mbuti	AR0180	AR0510	Uspallata	LH-LF|LH-F	darkorange4	22	Uspallata	LH-MF|LH-F	goldenrod1	21	398331	524	76021	71093	NA	NA	NA	NA	428419	5226	81975	328027	429348	5928	72431	105306
Mbuti	AR0180	AR0528	Uspallata	LH-LF|LH-F	darkorange4	22	Uspallata	LH-MF|LH-F	goldenrod1	21	38902	5787	67228	44744	NA	NA	NA	NA	422974	4958	85307	197903	422237	6234	67726	62302
Mbuti	AR0180	AR0526	Uspallata	LH-LF|LH-F	darkorange4	22	Uspallata	LH-MF|LH-F	goldenrod1	21	394174	5149	76552	63538	NA	NA	NA	NA	42833	4979	86023	286161	427223	5756	74221	91420
Mbuti	AR0180	AR0509	Uspallata	LH-LF|LH-F	darkorange4	22	Uspallata	LH-MF|LH-F	goldenrod1	21	396279	5116	77464	62670	NA	NA	NA	NA	425699	5072	83931	285023	42546	5904	72068	91196
Mbuti	AR0180	AR0520	Uspallata	LH-LF|LH-F	darkorange4	22	Uspallata	LH-LFplc|LH-F	darkorange	22	389198	7141	54.5	20051	NA	NA	NA	NA	421082	5337	78893	90822	413243	7327	56402	29300
Mbuti	AR0180	AR0519	Uspallata	LH-LF|LH-F	darkorange4	22	Uspallata	LH-MF|LH-F	goldenrod1	21	39923	5168	77257	72427	NA	NA	NA	NA	425394	4808	88467	333034	424152	5685	74603	106482
Mbuti	AR0180	AR0514	Uspallata	LH-LF|LH-F	darkorange4	22	Uspallata	LH-MF|LH-F	goldenrod1	21	39037	5786	67468	43538	NA	NA	NA	NA	426889	5103	83662	192030	428524	6542	65507	61641
Mbuti	AR0180	AR0518	Uspallata	LH-LF|LH-F	darkorange4	22	Uspallata	LH-MF|LH-F	goldenrod1	21	388704	5217	74514	72843	NA	NA	NA	NA	425204	5097	83416	338072	422718	5769	73271	108153
Mbuti	AR0180	AR0508	Uspallata	LH-LF|LH-F	darkorange4	22	Uspallata	LH-MF|LH-F	goldenrod1	21	391889	5901	66412	43253	NA	NA	NA	NA	424258	5126	82773	190532	425127	6137	69267	60378
Mbuti	AR0180	AR0527	Uspallata	LH-LF|LH-F	darkorange4	22	Uspallata	LH-MF|LH-F	goldenrod1	21	38931	5944	65.5	47666	NA	NA	NA	NA	419781	4899	85691	208281	426652	5834	73.13	65973
Mbuti	AR0500and513	AR0508	Uspallata	LH-MF|LH-F	goldenrod1	21	Uspallata	LH-MF|LH-F	goldenrod1	21	404787	4209	96182	213013	407549	6068	67158	41269	43737	4745	92.17	894272	442561	4984	88797	278325
Mbuti	AR0500and513	AR0528	Uspallata	LH-MF|LH-F	goldenrod1	21	Uspallata	LH-MF|LH-F	goldenrod1	21	427172	447	95562	221101	429377	6481	66251	42788	458871	4815	95306	933547	460597	512	89957	290017
Mbuti	AR0500and513	AR0506	Uspallata	LH-MF|LH-F	goldenrod1	21	Uspallata	LH-MF|LH-F	goldenrod1	21	414638	4135	100274	202584	417361	6501	64201	39159	443212	4607	96214	840934	443666	4922	90144	260681
Mbuti	AR0500and513	AR0521	Uspallata	LH-MF|LH-F	goldenrod1	21	Uspallata	LH-MF|LH-F	goldenrod1	21	409889	4093	100142	258410	417663	5659	73811	50329	441244	4513	97777	1084745	444407	4733	93901	338872
Mbuti	AR0500and513	AR0519	Uspallata	LH-MF|LH-F	goldenrod1	21	Uspallata	LH-MF|LH-F	goldenrod1	21	410311	3818	107472	352784	414712	5151	80518	69125	439495	4347	101104	1532808	441871	4602	96023	481062
Mbuti	AR0500and513	AR0512	Uspallata	LH-MF|LH-F	goldenrod1	21	Uspallata	LH-MF|LH-F	goldenrod1	21	406504	3844	105744	387413	408762	5112	79959	75818	436809	47	92932	1698979	438693	4917	89218	533327
Mbuti	AR0500and513	AR0501	Uspallata	LH-MF|LH-F	goldenrod1	21	Uspallata	LH-MF|LH-F	goldenrod1	21	415792	475	87527	105311	414849	8337	49758	20300	446376	4723	94503	437879	449122	5296	84802	135860
Mbuti	AR0500and513	AR0509	Uspallata	LH-MF|LH-F	goldenrod1	21	Uspallata	LH-MF|LH-F	goldenrod1	21	408395	3898	104763	307098	414896	5621	73.81	59818	439825	4677	94042	1321594	442003	5041	87688	413990
Mbuti	AR0500and513	AR0520	Uspallata	LH-MF|LH-F	goldenrod1	21	Uspallata	LH-LFplc|LH-F	darkorange	22	389102	4521	86066	96532	390336	8202	47589	18956	420138	4366	96227	414394	422558	5105	82771	130544
Mbuti	AR0500and513	AR0526	Uspallata	LH-MF|LH-F	goldenrod1	21	Uspallata	LH-MF|LH-F	goldenrod1	21	404805	3909	103567	312086	408014	558	73122	60840	437126	4689	93228	1329629	438032	4975	88.04	416652
Mbuti	AR0500and513	AR0517	Uspallata	LH-MF|LH-F	goldenrod1	21	Uspallata	LH-MFout|LH-F	goldenrod1	23	38031	4193	90706	123802	392903	7349	53466	23918	405875	4186	96957	508146	405324	4627	87605	159341
Mbuti	AR0500and513	AR0514	Uspallata	LH-MF|LH-F	goldenrod1	21	Uspallata	LH-MF|LH-F	goldenrod1	21	404785	4126	98118	213855	406309	579	70175	41736	43704	4585	95319	897382	437979	492	89014	281327
Mbuti	AR0500and513	AR0510	Uspallata	LH-MF|LH-F	goldenrod1	21	Uspallata	LH-MF|LH-F	goldenrod1	21	413252	3977	103898	346855	41544	5429	76523	67791	445334	4611	96586	1511239	444969	4754	93597	474334
Mbuti	AR0500and513	AR0505	Uspallata	LH-MF|LH-F	goldenrod1	21	Uspallata	LH-MF|LH-F	goldenrod1	21	403851	3906	103393	378400	413041	5182	79706	73795	437607	4619	94737	1629176	44176	4843	91.21	508568
Mbuti	AR0500and513	AR0504	Uspallata	LH-MF|LH-F	goldenrod1	21	Uspallata	LH-MF|LH-F	goldenrod1	21	415769	4077	101.99	380931	421437	5403	78005	74348	447744	4821	92881	1647010	451999	5015	90125	515838
Mbuti	AR0500and513	AR0527	Uspallata	LH-MF|LH-F	goldenrod1	21	Uspallata	LH-MF|LH-F	goldenrod1	21	411745	414	99461	235966	416136	5818	71525	45819	443347	4773	92883	985075	446784	494	90436	306191
Mbuti	AR0500and513	AR0518	Uspallata	LH-MF|LH-F	goldenrod1	21	Uspallata	LH-MF|LH-F	goldenrod1	21	408379	3962	103081	356032	413069	5338	77388	69575	438717	4616	95035	1555303	440083	4865	90453	488617
Mbuti	AR0501	AR0509	Uspallata	LH-MF|LH-F	goldenrod1	21	Uspallata	LH-MF|LH-F	goldenrod1	21	414874	4215	98432	178573	424333	6642	63.89	34257	451588	4668	96732	751066	457002	5138	88942	233935
Mbuti	AR0501	AR0520	Uspallata	LH-MF|LH-F	goldenrod1	21	Uspallata	LH-LFplc|LH-F	darkorange	22	390215	5435	71.79	56036	398995	10345	38568	10802	422036	4628	91196	235125	423423	5514	76796	73580
Mbuti	AR0501	AR0527	Uspallata	LH-MF|LH-F	goldenrod1	21	Uspallata	LH-MF|LH-F	goldenrod1	21	411084	4357	94343	137576	409972	731	56086	26395	44619	4443	100422	563251	452468	4981	90.84	174342
Mbuti	AR0501	AR0526	Uspallata	LH-MF|LH-F	goldenrod1	21	Uspallata	LH-MF|LH-F	goldenrod1	21	408809	4172	97984	181376	416933	6487	64275	34968	441373	4792	92097	757463	445187	5128	86.81	236019
Mbuti	AR0501	AR0504	Uspallata	LH-MF|LH-F	goldenrod1	21	Uspallata	LH-MF|LH-F	goldenrod1	21	428813	4375	98022	220756	442166	6048	73104	42630	463468	5008	92538	934471	468925	5285	88733	291179
Mbuti	AR0501	AR0519	Uspallata	LH-MF|LH-F	goldenrod1	21	Uspallata	LH-MF|LH-F	goldenrod1	21	408966	408	100245	204810	40829	6274	65077	39631	438775	4423	99201	870218	440262	4838	91007	271821
Mbuti	AR0501	AR0508	Uspallata	LH-MF|LH-F	goldenrod1	21	Uspallata	LH-MF|LH-F	goldenrod1	21	405301	4664	86891	124379	413133	7819	52.84	23706	438665	4681	93713	511202	443304	5269	84128	158062
Mbuti	AR0501	AR0510	Uspallata	LH-MF|LH-F	goldenrod1	21	Uspallata	LH-MF|LH-F	goldenrod1	21	404794	428	94578	201278	407146	6329	64333	38901	437022	4666	93653	856505	439503	4834	90915	267425
Mbuti	AR0501	AR0517	Uspallata	LH-MF|LH-F	goldenrod1	21	Uspallata	LH-MFout|LH-F	goldenrod1	23	383836	4732	81109	72262	380881	9091	41896	13823	415998	4601	90424	291408	417114	5522	75532	90924
Mbuti	AR0501	AR0518	Uspallata	LH-MF|LH-F	goldenrod1	21	Uspallata	LH-MF|LH-F	goldenrod1	21	422157	4184	100892	206499	427705	6292	67975	39947	454657	4639	98018	881112	457332	5015	91197	275109
Mbuti	AR0501	AR0505	Uspallata	LH-MF|LH-F	goldenrod1	21	Uspallata	LH-MF|LH-F	goldenrod1	21	414523	4336	95598	219359	425582	6335	67183	42298	448903	497	90325	924658	455327	5352	85078	287154
Mbuti	AR0501	AR0528	Uspallata	LH-MF|LH-F	goldenrod1	21	Uspallata	LH-MF|LH-F	goldenrod1	21	413925	4478	92432	129063	419846	7397	56758	24736	449568	4781	94034	533289	454687	528	86.11	164660
Mbuti	AR0501	AR0514	Uspallata	LH-MF|LH-F	goldenrod1	21	Uspallata	LH-MF|LH-F	goldenrod1	21	40486	433	93.5	124067	409113	736	55587	23886	436604	4546	96038	511678	441093	5065	87078	159069
Mbuti	AR0501	AR0512	Uspallata	LH-MF|LH-F	goldenrod1	21	Uspallata	LH-MF|LH-F	goldenrod1	21	433081	4263	101603	224247	436891	6211	70339	43406	468488	4899	95.63	960848	473793	5179	91481	300065
Mbuti	AR0501	AR0506	Uspallata	LH-MF|LH-F	goldenrod1	21	Uspallata	LH-MF|LH-F	goldenrod1	21	407122	4526	89.96	118124	416495	7931	52513	22696	438318	4748	92323	481464	440901	523	84305	148144
Mbuti	AR0501	AR0521	Uspallata	LH-MF|LH-F	goldenrod1	21	Uspallata	LH-MF|LH-F	goldenrod1	21	424766	4753	89.37	150159	432543	7351	58838	28735	458252	4991	91814	617830	461199	5434	84866	191379
Mbuti	AR0504	AR0517	Uspallata	LH-MF|LH-F	goldenrod1	21	Uspallata	LH-MFout|LH-F	goldenrod1	23	374662	3733	100362	259586	382441	5507	69446	50498	405558	4239	95684	1088049	408313	4482	91093	342671
Mbuti	AR0504	AR0508	Uspallata	LH-MF|LH-F	goldenrod1	21	Uspallata	LH-MF|LH-F	goldenrod1	21	401099	3852	104118	447752	408549	4951	82512	86885	433803	4469	97064	1918022	436214	4714	92529	598529
Mbuti	AR0504	AR0520	Uspallata	LH-MF|LH-F	goldenrod1	21	Uspallata	LH-LFplc|LH-F	darkorange	22	384106	394	97.48	203716	396277	5927	66861	40022	411344	4224	97373	891693	415284	4525	91782	282144
Mbuti	AR0504	AR0505	Uspallata	LH-MF|LH-F	goldenrod1	21	Uspallata	LH-MF|LH-F	goldenrod1	21	41585	3822	108815	803666	427192	4673	91427	157219	450882	4652	96.93	3538096	455184	4875	93375	1107455
Mbuti	AR0504	AR0514	Uspallata	LH-MF|LH-F	goldenrod1	21	Uspallata	LH-MF|LH-F	goldenrod1	21	405795	3757	108023	449372	410747	4944	83077	87847	439925	4572	96222	1926759	443183	4746	93374	605735
Mbuti	AR0504	AR0506	Uspallata	LH-MF|LH-F	goldenrod1	21	Uspallata	LH-MF|LH-F	goldenrod1	21	405551	3818	106229	424808	410181	5063	81.01	82389	436585	4348	100409	1799246	442019	4493	98389	559769
Mbuti	AR0504	AR0527	Uspallata	LH-MF|LH-F	goldenrod1	21	Uspallata	LH-MF|LH-F	goldenrod1	21	414668	3912	105994	496668	419173	4938	84879	96667	44863	4717	95113	2111682	452915	4886	92694	659086
Mbuti	AR0504	AR0526	Uspallata	LH-MF|LH-F	goldenrod1	21	Uspallata	LH-MF|LH-F	goldenrod1	21	40481	3712	109065	660739	411115	4636	88678	129327	437544	4559	95967	2873162	440276	4665	94382	903268
Mbuti	AR0504	AR0519	Uspallata	LH-MF|LH-F	goldenrod1	21	Uspallata	LH-MF|LH-F	goldenrod1	21	400967	3672	109208	748834	408917	4435	92201	146962	433132	4462	97062	3320096	436365	4616	94539	1044962
Mbuti	AR0504	AR0518	Uspallata	LH-MF|LH-F	goldenrod1	21	Uspallata	LH-MF|LH-F	goldenrod1	21	414177	3888	106531	754542	421693	4764	88514	148089	446822	4615	96815	3365762	450049	4747	94813	1060057
Mbuti	AR0504	AR0528	Uspallata	LH-MF|LH-F	goldenrod1	21	Uspallata	LH-MF|LH-F	goldenrod1	21	415335	4063	102228	465823	420102	5018	83713	90708	448126	4655	96263	2002387	451593	4793	94212	623708
Mbuti	AR0504	AR0521	Uspallata	LH-MF|LH-F	goldenrod1	21	Uspallata	LH-MF|LH-F	goldenrod1	21	421009	3785	111.23	544310	429789	4806	89428	106277	454916	4407	103223	2331669	459047	4534	101245	729564
Mbuti	AR0504	AR0509	Uspallata	LH-MF|LH-F	goldenrod1	21	Uspallata	LH-MF|LH-F	goldenrod1	21	414382	3942	105116	650386	423343	4786	88454	127071	446834	4859	91967	2850392	451892	5073	89.07	895325
Mbuti	AR0504	AR0510	Uspallata	LH-MF|LH-F	goldenrod1	21	Uspallata	LH-MF|LH-F	goldenrod1	21	405515	3713	109226	735774	413167	4548	90836	144420	436022	4524	96.37	3270128	439885	4673	94129	1030071
Mbuti	AR0504	AR0512	Uspallata	LH-MF|LH-F	goldenrod1	21	Uspallata	LH-MF|LH-F	goldenrod1	21	413729	3685	112.28	823771	418986	4591	91272	161733	448341	4556	98403	3692958	45242	4749	95259	1162645
Mbuti	AR0505	AR0509	Uspallata	LH-MF|LH-F	goldenrod1	21	Uspallata	LH-MF|LH-F	goldenrod1	21	415384	3934	105586	645336	426091	4866	87568	125930	447834	4888	91.62	2816473	454027	5101	89011	881362
Mbuti	AR0505	AR0514	Uspallata	LH-MF|LH-F	goldenrod1	21	Uspallata	LH-MF|LH-F	goldenrod1	21	404181	3743	107.99	446328	409031	5035	81232	87225	437019	4591	95198	1903218	441828	4842	91244	596231
Mbuti	AR0505	AR0526	Uspallata	LH-MF|LH-F	goldenrod1	21	Uspallata	LH-MF|LH-F	goldenrod1	21	402957	3608	111699	656031	410987	4599	89357	128226	437438	4536	96447	2839711	441321	4698	93.93	889710
Mbuti	AR0505	AR0528	Uspallata	LH-MF|LH-F	goldenrod1	21	Uspallata	LH-MF|LH-F	goldenrod1	21	405986	3746	108382	462998	413884	5029	82302	90141	440923	4499	97996	1984319	443956	4694	94577	616378
Mbuti	AR0505	AR0512	Uspallata	LH-MF|LH-F	goldenrod1	21	Uspallata	LH-MF|LH-F	goldenrod1	21	409924	3726	110011	817384	415707	4531	91.74	160284	443371	4762	93115	3651062	448585	493	90998	1144868
Mbuti	AR0505	AR0517	Uspallata	LH-MF|LH-F	goldenrod1	21	Uspallata	LH-MFout|LH-F	goldenrod1	23	382576	3728	102635	257574	3901	5551	70278	50182	413146	4285	96422	1074437	416419	4546	91603	337280
Mbuti	AR0505	AR0518	Uspallata	LH-MF|LH-F	goldenrod1	21	Uspallata	LH-MF|LH-F	goldenrod1	21	413442	3868	106882	748659	419714	466	90063	146650	444495	485	91646	3325623	447631	4978	89924	1042960
Mbuti	AR0505	AR0521	Uspallata	LH-MF|LH-F	goldenrod1	21	Uspallata	LH-MF|LH-F	goldenrod1	21	413324	3914	105.59	541021	418449	4988	83887	105550	445743	4754	93755	2308208	449971	4915	91549	720543
Mbuti	AR0505	AR0508	Uspallata	LH-MF|LH-F	goldenrod1	21	Uspallata	LH-MF|LH-F	goldenrod1	21	408143	4069	100309	444935	412041	5215	79003	86103	443365	4915	90206	1898567	448219	5136	87272	590504
Mbuti	AR0505	AR0527	Uspallata	LH-MF|LH-F	goldenrod1	21	Uspallata	LH-MF|LH-F	goldenrod1	21	417638	3942	105954	493460	421928	4973	84837	96064	452326	4743	95372	2092283	457904	4917	93133	650770
Mbuti	AR0505	AR0519	Uspallata	LH-MF|LH-F	goldenrod1	21	Uspallata	LH-MF|LH-F	goldenrod1	21	41454	382	108507	742403	420555	4624	90944	145573	446185	4615	96675	3277998	450319	4774	94322	1027689
Mbuti	AR0505	AR0510	Uspallata	LH-MF|LH-F	goldenrod1	21	Uspallata	LH-MF|LH-F	goldenrod1	21	425964	3815	111649	729003	434223	4678	92819	142912	462404	4693	98535	3227084	467008	4856	96162	1012573
Mbuti	AR0505	AR0520	Uspallata	LH-MF|LH-F	goldenrod1	21	Uspallata	LH-LFplc|LH-F	darkorange	22	386627	4179	92507	202095	402996	5985	67333	39816	418212	444	94192	878700	420836	48	87678	276888
Mbuti	AR0505	AR0506	Uspallata	LH-MF|LH-F	goldenrod1	21	Uspallata	LH-MF|LH-F	goldenrod1	21	404703	3742	108.16	422272	413654	5128	80667	81777	436179	4381	99564	1781981	440978	4622	95404	552766
Mbuti	AR0506	AR0527	Uspallata	LH-MF|LH-F	goldenrod1	21	Uspallata	LH-MF|LH-F	goldenrod1	21	410527	4085	100496	264434	417493	5884	70956	50999	441814	4587	96309	1082659	447611	4919	91	334318
Mbuti	AR0506	AR0518	Uspallata	LH-MF|LH-F	goldenrod1	21	Uspallata	LH-MF|LH-F	goldenrod1	21	402336	3859	104252	396760	408906	5132	79674	76980	431853	4255	101497	1693704	433897	4469	97.09	528036
Mbuti	AR0506	AR0519	Uspallata	LH-MF|LH-F	goldenrod1	21	Uspallata	LH-MF|LH-F	goldenrod1	21	405308	3803	106563	393750	408768	4965	82325	76459	435109	4391	99082	1671597	436668	459	95126	520837
Mbuti	AR0506	AR0512	Uspallata	LH-MF|LH-F	goldenrod1	21	Uspallata	LH-MF|LH-F	goldenrod1	21	408895	3783	108085	431515	412539	4944	83447	83821	440103	4412	99759	1849908	443566	4611	96204	576884
Mbuti	AR0506	AR0508	Uspallata	LH-MF|LH-F	goldenrod1	21	Uspallata	LH-MF|LH-F	goldenrod1	21	399079	3906	102182	238629	407602	6066	67195	45689	433138	4279	101233	981737	436394	4644	93968	303038
Mbuti	AR0506	AR0526	Uspallata	LH-MF|LH-F	goldenrod1	21	Uspallata	LH-MF|LH-F	goldenrod1	21	40251	371	108.48	348396	415866	5308	78345	67531	433658	4342	99868	1455407	437565	467	93704	452703
Mbuti	AR0506	AR0517	Uspallata	LH-MF|LH-F	goldenrod1	21	Uspallata	LH-MFout|LH-F	goldenrod1	23	376478	4107	91674	138015	389848	6788	57433	26431	407282	4115	98966	556170	409567	4524	90532	173059
Mbuti	AR0506	AR0510	Uspallata	LH-MF|LH-F	goldenrod1	21	Uspallata	LH-MF|LH-F	goldenrod1	21	397316	382	103996	386833	398959	5175	77096	75050	427261	4283	99758	1646014	430326	4524	95121	513425
Mbuti	AR0506	AR0528	Uspallata	LH-MF|LH-F	goldenrod1	21	Uspallata	LH-MF|LH-F	goldenrod1	21	405879	4058	100023	247930	41077	5969	68818	47673	438243	4544	96453	1025674	442286	4959	89194	316154
Mbuti	AR0506	AR0520	Uspallata	LH-MF|LH-F	goldenrod1	21	Uspallata	LH-LFplc|LH-F	darkorange	22	385471	4581	84138	107454	390465	7454	52.38	21008	412768	4273	96.6	449931	412616	4908	84063	140974
Mbuti	AR0506	AR0521	Uspallata	LH-MF|LH-F	goldenrod1	21	Uspallata	LH-MF|LH-F	goldenrod1	21	417083	3963	105256	288526	423945	5813	72936	55682	446491	4359	102439	1189854	449605	4641	96872	368707
Mbuti	AR0506	AR0514	Uspallata	LH-MF|LH-F	goldenrod1	21	Uspallata	LH-MF|LH-F	goldenrod1	21	399243	4008	99606	238234	402869	5956	67638	45973	434181	4472	97089	982096	439145	4805	91.39	305002
Mbuti	AR0506	AR0509	Uspallata	LH-MF|LH-F	goldenrod1	21	Uspallata	LH-MF|LH-F	goldenrod1	21	414039	392	105625	342954	418866	5609	74683	66319	444076	4588	96797	1442010	44988	4951	90875	448551
Mbuti	AR0508	AR0510	Uspallata	LH-MF|LH-F	goldenrod1	21	Uspallata	LH-MF|LH-F	goldenrod1	21	414684	4094	101289	407500	420643	5316	79123	79012	448331	4702	95342	1755434	453089	487	93043	548677
Mbuti	AR0508	AR0527	Uspallata	LH-MF|LH-F	goldenrod1	21	Uspallata	LH-MF|LH-F	goldenrod1	21	400693	3882	103224	278160	400283	5492	72.89	53611	434678	456	95326	1149630	437055	4874	89667	356140
Mbuti	AR0508	AR0520	Uspallata	LH-MF|LH-F	goldenrod1	21	Uspallata	LH-LFplc|LH-F	darkorange	22	388141	4523	85824	113410	39412	7602	51846	22154	415653	4415	94141	480130	41984	4897	85731	150478
Mbuti	AR0508	AR0512	Uspallata	LH-MF|LH-F	goldenrod1	21	Uspallata	LH-MF|LH-F	goldenrod1	21	405024	3731	108568	454992	409157	4877	83901	88491	437795	4506	97155	1974331	440977	473	93223	617360
Mbuti	AR0508	AR0528	Uspallata	LH-MF|LH-F	goldenrod1	21	Uspallata	LH-MF|LH-F	goldenrod1	21	404068	3971	101745	260616	406591	5717	71114	50198	435969	4549	95836	1090066	43969	4905	89642	336971
Mbuti	AR0508	AR0519	Uspallata	LH-MF|LH-F	goldenrod1	21	Uspallata	LH-MF|LH-F	goldenrod1	21	433256	4312	100474	414001	437943	5466	80127	80533	468961	5054	92795	1778919	472244	527	89609	556260
Mbuti	AR0508	AR0518	Uspallata	LH-MF|LH-F	goldenrod1	21	Uspallata	LH-MF|LH-F	goldenrod1	21	425552	4229	100638	417659	426829	5327	80123	81101	460026	5029	91481	1805620	460907	5275	87.38	564539
Mbuti	AR0508	AR0526	Uspallata	LH-MF|LH-F	goldenrod1	21	Uspallata	LH-MF|LH-F	goldenrod1	21	405056	3792	106828	366718	413907	5081	81465	71026	438644	4402	99642	1549230	442437	4624	95681	483756
Mbuti	AR0508	AR0517	Uspallata	LH-MF|LH-F	goldenrod1	21	Uspallata	LH-MFout|LH-F	goldenrod1	23	377751	3931	96089	144875	385481	6599	58417	27890	407192	4283	95078	591082	409195	4608	88802	184259
Mbuti	AR0508	AR0521	Uspallata	LH-MF|LH-F	goldenrod1	21	Uspallata	LH-MF|LH-F	goldenrod1	21	404827	4102	98695	303400	408991	5797	70.55	58636	43608	4549	95852	1263420	440052	4784	91984	392813
Mbuti	AR0508	AR0514	Uspallata	LH-MF|LH-F	goldenrod1	21	Uspallata	LH-MF|LH-F	goldenrod1	21	426728	4144	102974	250329	432867	6217	69628	48394	462276	4778	96756	1042497	465057	5183	89726	325132
Mbuti	AR0508	AR0509	Uspallata	LH-MF|LH-F	goldenrod1	21	Uspallata	LH-MF|LH-F	goldenrod1	21	412433	4119	100125	361848	417916	5582	74865	69948	446416	4674	95507	1537599	450208	4985	90319	479537
Mbuti	AR0509	AR0520	Uspallata	LH-MF|LH-F	goldenrod1	21	Uspallata	LH-LFplc|LH-F	darkorange	22	388134	4212	92154	164273	401965	6353	63273	32244	41447	4402	94162	714123	415787	4857	85607	226322
Mbuti	AR0509	AR0528	Uspallata	LH-MF|LH-F	goldenrod1	21	Uspallata	LH-MF|LH-F	goldenrod1	21	410864	3796	108233	376406	417163	507	82273	73246	443321	4436	99929	1606946	445325	4674	95268	500776
Mbuti	AR0509	AR0521	Uspallata	LH-MF|LH-F	goldenrod1	21	Uspallata	LH-MF|LH-F	goldenrod1	21	414579	3877	106936	439009	421505	5035	83723	85531	446304	4567	97726	1865815	449878	4777	94185	584049
Mbuti	AR0509	AR0517	Uspallata	LH-MF|LH-F	goldenrod1	21	Uspallata	LH-MFout|LH-F	goldenrod1	23	383318	3784	101308	209841	394123	596	66129	40760	410409	4192	97907	873489	413215	4456	92.74	275096
Mbuti	AR0509	AR0518	Uspallata	LH-MF|LH-F	goldenrod1	21	Uspallata	LH-MF|LH-F	goldenrod1	21	448245	4245	105594	605911	455255	5108	89128	118746	482985	5137	94.02	2685653	486175	5336	91115	845924
Mbuti	AR0509	AR0526	Uspallata	LH-MF|LH-F	goldenrod1	21	Uspallata	LH-MF|LH-F	goldenrod1	21	404425	3659	110522	532152	412877	4742	87077	103858	436565	4418	98822	2297233	439777	4631	94956	722481
Mbuti	AR0509	AR0519	Uspallata	LH-MF|LH-F	goldenrod1	21	Uspallata	LH-MF|LH-F	goldenrod1	21	410275	3725	110135	602072	413097	4742	87112	117917	439976	4599	95666	2651853	442434	4862	90996	834841
Mbuti	AR0509	AR0510	Uspallata	LH-MF|LH-F	goldenrod1	21	Uspallata	LH-MF|LH-F	goldenrod1	21	414251	396	104617	591724	419358	4794	87479	115942	445777	4782	93227	2614917	448903	4959	90532	824080
Mbuti	AR0509	AR0527	Uspallata	LH-MF|LH-F	goldenrod1	21	Uspallata	LH-MF|LH-F	goldenrod1	21	416981	3826	108976	401256	41891	501	83617	77884	448564	4628	96917	1691921	453145	4828	93856	527716
Mbuti	AR0509	AR0514	Uspallata	LH-MF|LH-F	goldenrod1	21	Uspallata	LH-MF|LH-F	goldenrod1	21	406555	376	108125	362570	409234	5157	79359	70778	438116	4542	96458	1543123	443023	4835	91631	485391
Mbuti	AR0509	AR0512	Uspallata	LH-MF|LH-F	goldenrod1	21	Uspallata	LH-MF|LH-F	goldenrod1	21	415027	371	111878	661362	422472	4713	89643	129578	447519	465	96244	2941551	451217	4913	91837	926387
Mbuti	AR0510	AR0514	Uspallata	LH-MF|LH-F	goldenrod1	21	Uspallata	LH-MF|LH-F	goldenrod1	21	40928	3753	109047	408898	410408	4968	82602	80159	441959	4458	99136	1764092	444879	4642	95836	556756
Mbuti	AR0510	AR0517	Uspallata	LH-MF|LH-F	goldenrod1	21	Uspallata	LH-MFout|LH-F	goldenrod1	23	380231	371	102475	236676	388625	5651	68774	46112	407795	4079	99976	996008	410453	4404	93208	314558
Mbuti	AR0510	AR0526	Uspallata	LH-MF|LH-F	goldenrod1	21	Uspallata	LH-MF|LH-F	goldenrod1	21	400052	3785	105708	601350	408611	4672	87464	117834	430439	4641	92741	2632156	432647	4731	91455	830281
Mbuti	AR0510	AR0518	Uspallata	LH-MF|LH-F	goldenrod1	21	Uspallata	LH-MF|LH-F	goldenrod1	21	413616	3938	105029	686091	417567	4657	89668	134945	44286	4757	93091	3090146	445229	4866	91501	976206
Mbuti	AR0510	AR0512	Uspallata	LH-MF|LH-F	goldenrod1	21	Uspallata	LH-MF|LH-F	goldenrod1	21	408157	3567	114441	748565	410363	4402	93221	147326	440481	4452	98941	3380549	443056	4573	96.89	1067074
Mbuti	AR0510	AR0527	Uspallata	LH-MF|LH-F	goldenrod1	21	Uspallata	LH-MF|LH-F	goldenrod1	21	414246	3852	107542	452071	417152	4906	85028	88237	444571	4481	99217	1932736	448738	4671	96075	604584
Mbuti	AR0510	AR0520	Uspallata	LH-MF|LH-F	goldenrod1	21	Uspallata	LH-LFplc|LH-F	darkorange	22	385556	4182	92183	185403	400381	6331	63239	36514	412519	4288	96204	818608	416448	4712	88379	260279
Mbuti	AR0510	AR0521	Uspallata	LH-MF|LH-F	goldenrod1	21	Uspallata	LH-MF|LH-F	goldenrod1	21	413844	3775	109.62	495253	417716	4937	84606	96896	446027	4519	98709	2133313	448104	4641	96561	669552
Mbuti	AR0510	AR0519	Uspallata	LH-MF|LH-F	goldenrod1	21	Uspallata	LH-MF|LH-F	goldenrod1	21	41766	3855	108332	679935	418993	4623	90642	133731	449022	4578	98092	3041601	452453	4811	94055	960459
Mbuti	AR0510	AR0528	Uspallata	LH-MF|LH-F	goldenrod1	21	Uspallata	LH-MF|LH-F	goldenrod1	21	408142	3952	103288	423930	41205	5121	80.47	82629	439365	4589	95747	1834872	441246	4762	92651	573372
Mbuti	AR0512	AR0518	Uspallata	LH-MF|LH-F	goldenrod1	21	Uspallata	LH-MF|LH-F	goldenrod1	21	426036	3899	109259	767105	430929	4682	92037	150955	46043	491	93777	3477650	462679	5056	91.51	1097484
Mbuti	AR0512	AR0514	Uspallata	LH-MF|LH-F	goldenrod1	21	Uspallata	LH-MF|LH-F	goldenrod1	21	408276	3683	110864	456927	4076	4833	84329	89647	441762	465	95.01	1983951	44363	4861	91269	625511
Mbuti	AR0512	AR0528	Uspallata	LH-MF|LH-F	goldenrod1	21	Uspallata	LH-MF|LH-F	goldenrod1	21	40644	3782	107.46	473479	408271	4962	82279	92382	44013	467	94251	2063512	443316	4876	90912	644280
Mbuti	AR0512	AR0527	Uspallata	LH-MF|LH-F	goldenrod1	21	Uspallata	LH-MF|LH-F	goldenrod1	21	410765	3843	106881	504729	411323	4937	83312	98575	443115	4633	95.64	2173776	447514	4846	92355	680027
Mbuti	AR0512	AR0526	Uspallata	LH-MF|LH-F	goldenrod1	21	Uspallata	LH-MF|LH-F	goldenrod1	21	408849	3957	103312	671725	416877	4779	87237	131759	444749	4888	90992	2962171	448509	5055	88733	933697
Mbuti	AR0512	AR0521	Uspallata	LH-MF|LH-F	goldenrod1	21	Uspallata	LH-MF|LH-F	goldenrod1	21	412257	3774	109226	553537	415952	489	85057	108371	44393	4529	98022	2401771	447487	4703	95.15	753501
Mbuti	AR0512	AR0519	Uspallata	LH-MF|LH-F	goldenrod1	21	Uspallata	LH-MF|LH-F	goldenrod1	21	404226	3633	111267	761683	406614	4374	92.97	149978	432345	4578	94438	3429803	434342	4702	92377	1082149
Mbuti	AR0512	AR0517	Uspallata	LH-MF|LH-F	goldenrod1	21	Uspallata	LH-MFout|LH-F	goldenrod1	23	384598	3471	110788	263561	384861	5242	73413	51428	410919	4143	99183	1118297	414121	4407	93974	353060
Mbuti	AR0512	AR0520	Uspallata	LH-MF|LH-F	goldenrod1	21	Uspallata	LH-LFplc|LH-F	darkorange	22	390985	4121	94883	207293	398626	592	67337	40943	418703	4237	98819	920184	421322	4574	92106	292052
Mbuti	AR0514	AR0521	Uspallata	LH-MF|LH-F	goldenrod1	21	Uspallata	LH-MF|LH-F	goldenrod1	21	407325	3938	103431	304531	414182	5431	76258	59575	438912	4414	99432	1267763	443138	4709	94095	397038
Mbuti	AR0514	AR0526	Uspallata	LH-MF|LH-F	goldenrod1	21	Uspallata	LH-MF|LH-F	goldenrod1	21	404834	3746	108077	367786	407461	5137	79315	71929	439032	4548	96535	1555375	441747	4815	91748	489401
Mbuti	AR0514	AR0527	Uspallata	LH-MF|LH-F	goldenrod1	21	Uspallata	LH-MF|LH-F	goldenrod1	21	405217	392	103378	277813	402483	5509	73057	54026	438545	4541	96566	1149167	441669	4737	93237	358822
Mbuti	AR0514	AR0517	Uspallata	LH-MF|LH-F	goldenrod1	21	Uspallata	LH-MFout|LH-F	goldenrod1	23	383386	4038	94952	145507	382649	6642	57609	28257	413431	4297	96208	595589	411808	4735	86964	187146
Mbuti	AR0514	AR0518	Uspallata	LH-MF|LH-F	goldenrod1	21	Uspallata	LH-MF|LH-F	goldenrod1	21	413743	39	106101	419397	418926	5074	82566	82161	44774	4718	94907	1814354	448219	4877	91902	572123
Mbuti	AR0514	AR0519	Uspallata	LH-MF|LH-F	goldenrod1	21	Uspallata	LH-MF|LH-F	goldenrod1	21	43147	4131	104459	415761	435455	5224	83357	81474	464703	4858	95661	1789250	46775	5114	91464	563769
Mbuti	AR0514	AR0520	Uspallata	LH-MF|LH-F	goldenrod1	21	Uspallata	LH-LFplc|LH-F	darkorange	22	387712	4208	92127	113897	400036	7181	55708	22355	412475	4306	95782	485641	417903	4871	85791	154048
Mbuti	AR0514	AR0528	Uspallata	LH-MF|LH-F	goldenrod1	21	Uspallata	LH-MF|LH-F	goldenrod1	21	397266	385	103196	261251	396118	5548	71396	50825	429722	441	97448	1090614	431605	4861	88.78	340117
Mbuti	AR0517	AR0519	Uspallata	LH-MFout|LH-F	goldenrod1	23	Uspallata	LH-MF|LH-F	goldenrod1	21	385841	3653	105609	240449	39512	5537	71365	46874	413291	4138	99878	1011308	415405	4467	92996	319132
Mbuti	AR0517	AR0528	Uspallata	LH-MFout|LH-F	goldenrod1	23	Uspallata	LH-MF|LH-F	goldenrod1	21	376735	3899	96628	150789	386487	6402	60366	29175	408154	4177	97714	617071	411233	4552	90348	192026
Mbuti	AR0517	AR0526	Uspallata	LH-MFout|LH-F	goldenrod1	23	Uspallata	LH-MF|LH-F	goldenrod1	21	383077	3781	101318	212631	38702	5718	67.69	41376	408459	4215	96904	880357	410653	4521	90829	276868
Mbuti	AR0517	AR0518	Uspallata	LH-MFout|LH-F	goldenrod1	23	Uspallata	LH-MF|LH-F	goldenrod1	21	381651	3782	100921	242404	385273	5498	70077	47413	410029	4147	98877	1024265	410575	4462	92022	323522
Mbuti	AR0517	AR0520	Uspallata	LH-MFout|LH-F	goldenrod1	23	Uspallata	LH-LFplc|LH-F	darkorange	22	383423	4906	78.15	65719	387206	9012	42967	12817	40307	433	93078	274117	404954	5349	75701	86816
Mbuti	AR0517	AR0521	Uspallata	LH-MFout|LH-F	goldenrod1	23	Uspallata	LH-MF|LH-F	goldenrod1	21	383336	383	100098	176116	390837	6207	62.97	34256	409952	4037	101557	718686	41244	4446	92.77	225327
Mbuti	AR0517	AR0527	Uspallata	LH-MFout|LH-F	goldenrod1	23	Uspallata	LH-MF|LH-F	goldenrod1	21	3788	4081	92831	161222	384701	6391	60196	31272	408292	4367	93504	651541	411098	4816	85365	203709
Mbuti	AR0518	AR0520	Uspallata	LH-MF|LH-F	goldenrod1	21	Uspallata	LH-LFplc|LH-F	darkorange	22	389445	4067	95757	190296	392696	6182	63521	37659	416632	4274	97483	842724	417171	4706	88649	267837
Mbuti	AR0518	AR0519	Uspallata	LH-MF|LH-F	goldenrod1	21	Uspallata	LH-MF|LH-F	goldenrod1	21	418315	3852	108602	697872	423923	4603	92.09	137406	447646	4714	94952	3132166	449408	4862	92.44	988784
Mbuti	AR0518	AR0527	Uspallata	LH-MF|LH-F	goldenrod1	21	Uspallata	LH-MF|LH-F	goldenrod1	21	412152	4012	102728	463668	412998	5011	82426	90519	443757	4785	92745	1988917	447535	4954	90331	621901
Mbuti	AR0518	AR0526	Uspallata	LH-MF|LH-F	goldenrod1	21	Uspallata	LH-MF|LH-F	goldenrod1	21	404806	3854	105.03	616315	411652	4737	86897	120758	435637	4667	93334	2708643	436253	48	90895	854392
Mbuti	AR0518	AR0521	Uspallata	LH-MF|LH-F	goldenrod1	21	Uspallata	LH-MF|LH-F	goldenrod1	21	415213	398	104.33	508154	419135	4968	84367	99440	444992	4575	97.27	2196428	446047	4731	94276	689098
Mbuti	AR0518	AR0528	Uspallata	LH-MF|LH-F	goldenrod1	21	Uspallata	LH-MF|LH-F	goldenrod1	21	410984	3963	103709	435434	417108	5072	82235	84967	442842	4501	98381	1888871	444296	469	94736	589769
Mbuti	AR0519	AR0521	Uspallata	LH-MF|LH-F	goldenrod1	21	Uspallata	LH-MF|LH-F	goldenrod1	21	406953	3985	102124	504613	413609	4982	83018	98666	437792	4545	96333	2167880	439061	4708	93265	679785
Mbuti	AR0519	AR0520	Uspallata	LH-MF|LH-F	goldenrod1	21	Uspallata	LH-LFplc|LH-F	darkorange	22	385982	4054	95207	188588	387046	5898	65624	37259	413271	4249	97261	830583	413074	4611	89594	263547
Mbuti	AR0519	AR0527	Uspallata	LH-MF|LH-F	goldenrod1	21	Uspallata	LH-MF|LH-F	goldenrod1	21	408682	375	108994	460182	407827	4899	83249	89732	439864	4598	95669	1962324	443665	4792	92586	613412
Mbuti	AR0519	AR0528	Uspallata	LH-MF|LH-F	goldenrod1	21	Uspallata	LH-MF|LH-F	goldenrod1	21	400175	3631	110215	431763	405864	4847	83731	84122	430297	4408	97617	1863869	431612	4649	92831	581857
Mbuti	AR0519	AR0526	Uspallata	LH-MF|LH-F	goldenrod1	21	Uspallata	LH-MF|LH-F	goldenrod1	21	403472	3695	109.18	610972	409323	45	90968	119773	436111	4535	96172	2669124	437892	4646	94258	840882
Mbuti	AR0520	AR0521	Uspallata	LH-LFplc|LH-F	darkorange	22	Uspallata	LH-MF|LH-F	goldenrod1	21	384762	4331	88.84	137181	391552	6957	56283	26901	415262	4243	97878	584298	419064	4659	89938	184322
Mbuti	AR0520	AR0527	Uspallata	LH-LFplc|LH-F	darkorange	22	Uspallata	LH-MF|LH-F	goldenrod1	21	387764	4318	89792	125291	391961	7085	55323	24559	416761	4345	95922	527849	420098	4828	87018	165839
Mbuti	AR0520	AR0526	Uspallata	LH-LFplc|LH-F	darkorange	22	Uspallata	LH-MF|LH-F	goldenrod1	21	391427	417	93873	166433	406227	6567	61859	32725	417681	4287	97422	718985	419072	4633	90462	227669
Mbuti	AR0520	AR0528	Uspallata	LH-LFplc|LH-F	darkorange	22	Uspallata	LH-MF|LH-F	goldenrod1	21	38977	4503	86551	117939	398979	7562	52758	23016	417583	4444	93962	501517	419165	499	83994	157129
Mbuti	AR0521	AR0527	Uspallata	LH-MF|LH-F	goldenrod1	21	Uspallata	LH-MF|LH-F	goldenrod1	21	408145	3893	104846	337278	416921	5393	77306	65364	440793	4576	96.33	1395644	444807	4898	90822	433790
Mbuti	AR0521	AR0526	Uspallata	LH-MF|LH-F	goldenrod1	21	Uspallata	LH-MF|LH-F	goldenrod1	21	409087	3648	112.15	445782	419439	4895	85689	86755	442542	4301	102901	1881844	444593	4475	99.34	589750
Mbuti	AR0521	AR0528	Uspallata	LH-MF|LH-F	goldenrod1	21	Uspallata	LH-MF|LH-F	goldenrod1	21	417017	4078	102268	315895	423563	5727	73963	61270	449361	4576	98189	1321253	453432	4849	93518	409756
Mbuti	AR0526	AR0527	Uspallata	LH-MF|LH-F	goldenrod1	21	Uspallata	LH-MF|LH-F	goldenrod1	21	399805	3735	107044	407722	402074	4975	80826	79340	433707	4598	94317	1708282	436169	4853	89885	533530
Mbuti	AR0526	AR0528	Uspallata	LH-MF|LH-F	goldenrod1	21	Uspallata	LH-MF|LH-F	goldenrod1	21	398896	3762	106.04	381970	404876	5281	76664	74239	431286	4515	95519	1618577	433924	475	91356	504594
Mbuti	AR0527	AR0528	Uspallata	LH-MF|LH-F	goldenrod1	21	Uspallata	LH-MF|LH-F	goldenrod1	21	409677	4062	100862	289551	413605	5535	74731	55984	444539	4688	94833	1201886	4493	4882	92024	371815
Mbuti	B-03	SN-53	California_Baja_LH	Mexico_Pericues_Unknown.SG	palevioletred1	4	California_SouthernChannelIslands_LH	USA_CA_SanNicolas_1600BP.SG	violet	8	373976	5387	69425	48713	365001	10439	34967	9448	407072	4834	84204	195668	406743	6031	67444	60834
Mbuti	B-03	MX-01	California_Baja_LH	Mexico_Pericues_Unknown.SG	palevioletred1	4	California_Baja_LH	Mexico_Baja_IronSprings_Unknown.SG	palevioletred1	2	390853	8116	48.16	16910	NA	NA	NA	NA	409504	5692	71949	69579	411216	7957	51682	22275
Mbuti	B-03	AR0162	California_Baja_LH	Mexico_Pericues_Unknown.SG	palevioletred1	4	Uspallata	LH-LF|LH-F	darkorange4	21	361217	4338	83262	129856	362804	69	52.58	25363	391604	4437	88257	533617	395558	4914	80498	168060
Mbuti	B-03	AR0149	California_Baja_LH	Mexico_Pericues_Unknown.SG	palevioletred1	4	Uspallata	LH-HG|LH-HG	darkorange4	23	358277	5876	60974	38678	NA	NA	NA	NA	383082	4997	76665	168906	384211	649	59.2	53855
Mbuti	B-03	AR0512	California_Baja_LH	Mexico_Pericues_Unknown.SG	palevioletred1	4	Uspallata	LH-MF|LH-F	goldenrod1	21	363806	3924	92714	195427	360799	5631	64075	38270	391609	4384	89324	835931	394979	469	84216	263776
Mbuti	B-03	SM-02	California_Baja_LH	Mexico_Pericues_Unknown.SG	palevioletred1	4	California_NorthernChannelIslands_LH	USA_CA_SanMiguel_650BP.SG	violet	1	374959	4077	91968	169244	37536	6192	60618	32972	40539	4387	92411	706074	406747	4868	83.56	221861
Mbuti	B-03	PS-07	California_Baja_LH	Mexico_Pericues_Unknown.SG	palevioletred1	4	California_SouthernMainland_LH	USA_CA_PointSal_1500BP.SG	palevioletred3	2	382632	5689	67262	41492	NA	NA	NA	NA	408075	4872	83752	160691	409052	622	65764	50041
Mbuti	B-03	2417J	California_Baja_LH	Mexico_Pericues_Unknown.SG	palevioletred1	4	CentralAmerica_LH	Mexico_SierraGorda_Postclassic.SG	darkviolet	3	365537	3882	94166	140773	365465	6266	58324	27430	389526	4142	94044	595938	391715	467	83872	187497
Mbuti	B-03	2417Q	California_Baja_LH	Mexico_Pericues_Unknown.SG	palevioletred1	4	CentralAmerica_LH	Mexico_SierraGorda_Terminalclassic.SG	darkviolet	4	37134	3908	95024	194592	376536	5932	63475	38189	394961	45	87777	843721	395879	5002	79147	266150
Mbuti	B-03	NC	California_Baja_LH	Mexico_Pericues_Unknown.SG	palevioletred1	4	California_SouthernMainland_LH	USA_CA_NewCuyama_1300BP.SG	palevioletred3	1	369713	4478	82556	79090	352256	7884	44682	15367	397851	4304	92439	318512	397202	5064	78.43	99127
Mbuti	B-03	AR0517	California_Baja_LH	Mexico_Pericues_Unknown.SG	palevioletred1	4	Uspallata	LH-MFout|LH-F	goldenrod1	23	360525	5008	71996	62113	359535	9003	39936	12015	39303	4393	89467	251331	397959	5523	72052	79037
Mbuti	B-03	SN-15	California_Baja_LH	Mexico_Pericues_Unknown.SG	palevioletred1	4	California_SouthernChannelIslands_LH	USA_CA_SanNicolas_1600BP.SG	violet	8	370562	6146	60.29	34920	NA	NA	NA	NA	398769	5171	77123	146577	398052	654	60866	46646
Mbuti	B-03	SN-16	California_Baja_LH	Mexico_Pericues_Unknown.SG	palevioletred1	4	California_SouthernChannelIslands_LH	USA_CA_SanNicolas_1600BP.SG	violet	8	36708	7013	52341	22227	NA	NA	NA	NA	40037	5289	75695	88139	401683	7281	55166	27358
Mbuti	B-03	SN-17	California_Baja_LH	Mexico_Pericues_Unknown.SG	palevioletred1	4	California_SouthernChannelIslands_MH	USA_CA_SanNicolas_4800BP.SG	violet	23	364163	4042	90093	174514	365075	6206	58827	34343	390549	4575	85373	735275	394909	4968	79494	233406
Mbuti	B-03	SC-01	California_Baja_LH	Mexico_Pericues_Unknown.SG	palevioletred1	4	California_SouthernChannelIslands_LH	USA_CA_SanClemente_900BP.SG	violet	7	37458	5877	63739	36365	NA	NA	NA	NA	399049	5008	79682	149136	40057	6453	62075	47151
Mbuti	B-03	AR0514	California_Baja_LH	Mexico_Pericues_Unknown.SG	palevioletred1	4	Uspallata	LH-MF|LH-F	goldenrod1	21	359707	4327	83123	107286	358667	7295	49163	21021	391197	457	85.61	442621	392568	5179	75795	139356
[truncated: 58,400 more rows]

## Sheet: B. MDS from F3
Individual	MajorGroup	Group	Color	Point	Dim1_1240K	Dim2_1240K	Dim3_1240K	Dim4_1240K	Dim5_1240K	Dim6_1240K	Dim7_1240K	Dim8_1240K	Dim9_1240K	Dim10_1240K	Dim11_1240K	Dim12_1240K	Dim1_1240K.TVs	Dim2_1240K.TVs	Dim3_1240K.TVs	Dim4_1240K.TVs	Dim5_1240K.TVs	Dim6_1240K.TVs	Dim7_1240K.TVs	Dim8_1240K.TVs	Dim9_1240K.TVs	Dim10_1240K.TVs	Dim11_1240K.TVs	Dim12_1240K.TVs	Dim1_SG	Dim2_SG	Dim3_SG	Dim4_SG	Dim5_SG	Dim6_SG	Dim7_SG	Dim8_SG	Dim9_SG	Dim10_SG	Dim11_SG	Dim12_SG	Dim1_SG.TVs	Dim2_SG.TVs	Dim3_SG.TVs	Dim4_SG.TVs	Dim5_SG.TVs	Dim6_SG.TVs	Dim7_SG.TVs	Dim8_SG.TVs	Dim9_SG.TVs
[truncated: 350 more rows]
[truncated: 3 more columns]

[truncated: 5 more sheets: C.  F4(Out,Modern;UV,ancientSA), D. F4(Out,SNA; UV1,UV2), E. F4(Out, UV; SNA1,SNA2), F. F4(Out,North Central;UV,SA), G. F4 with SNA, LH-HG and LH-F]
