# Supplementary material for: Local agricultural transition, crisis and migration in the Southern Andes
Source: Research Square preprint supplement (doi:10.21203/rs.3.rs-6450570/v1), 2025-05-05
Supplement: Supplementary file 8 [file e5ef215eee2c5a35214bf2fc.xlsx]

## Sheet: SupplementaryTable1_
Warnings	Individual	Skeletal Element	Library_ID	Skeletal Element Type	archaeologistID	Site	Laboratory	strandness	UDG	#bp trimmed in 5'	#bp trimmed in 3'	Lib.GenomicSex	Sample.GenomicSex	% Endogenous DNA	% Duplicated reads	MeanReadLength	Nuclear.BreadthOfCoverage	Nuclear.DepthOfCoverage	Sample.Nuclear.BreadthOfCoverage	Sample.Nuclear.BreadthOfCoverage	Nuclear1240K.BreadthOfCoverage	Nuclear1240K.DepthOfCoverage	Sample.Nuclear1240K.DepthOfCoverage	Sample.Nuclear1240K.BreadOfCoverage	MT.BreadthOfCoverage	MT.DepthOfCoverage	Sample.MT.BreadthOfCoverage	Sample.MT.DepthOfCoverage	NuclearContam	NuclearContam.se	ContamMix	ContamMix.se	ContamLD	ContamLD.se	ContamLD.Ref	ContamLD.Comment	Schmutzi_auto	Schmutzi_auto.lower	Schmutzi_auto.upper	Schmutzi_table	Schmutzi_table.lower	Schmutzi_table.upper	Haplocheck.Status	Haplocheck.Level	Haplocheck.Coverage
LowCov	AR0147	AR0147.1	AR0147_1_02	Tooth	4	Barrancas B6	Globe, Copenaghen; CAGT	double	full	1	5	Male	Male	0.207155	7.4572	103.8948313	0.000400042	0.000401687	0.000401687	0.000400042	0.000418029	0.000418029	0.000418029	0.000418029	0.152997	0.164222	0.152997	0.164222	NA	NA	0	1.00E-06	NA	NA	NA	NA	0.99	0.98	0.99	NA	NA	NA	ND	ND	2
LowCov	AR0148	AR0148.1	AR0148.1.0201	Tooth	5	Barrancas B6	Globe, Copenhagen	single	half	3	3	Male	Male	0.840456	0.0977	67.35712152	0.00287185	0.00289324	0.003254795	0.0032301	0.00319735	0.00320952	0.003577142	0.00356498	0.858048	1.90983	0.947191	2.94061	NA	NA	0.19	9.00E-04	NA	NA	NA	NA	0.99	0.98	0.99	0.99	0.98	0.99	ND	ND	2
LowCov	AR0148	AR0148.1	AR0148_1_06	Tooth	5	Barrancas B6	Globe, Copenaghen; CAGT	double	full	6	6	Unassigned	Male	0.099038	3.6359	74.40062178	0.00036076	0.000361555	0.003254795	0.0032301	0.000367622	0.000367622	0.003577142	0.00356498	0.666667	1.03078	0.947191	2.94061	NA	NA	0	1.00E-04	NA	NA	NA	NA	0.99	0.98	0.99	NA	NA	NA	ND	ND	2
	AR0149	AR0149.1	AR0149_1_02	Tooth	12	Barrancas B6	Globe, Copenaghen; CAGT	double	full	3	3	Male	Male	6.5141975	0.08	118.7458175	0.190129	0.213938	0.213938	0.190129	0.201206	0.225475	0.225475	0.201206	0.999879	17.4219	0.999879	17.4219	-0.002416	0.002149745	1	8.00E-04	-0.046	0.007	PEL	Model_Misspecified	0.01	0	0.02	NA	NA	NA	ND	ND	13
	AR0151	AR0151.1	AR0151_1_01	Tooth	19	Barrancas B6	Globe, Copenaghen; CAGT	double	full	3	3	Male	Male	6.741369	0.0453	110.5816513	0.318777	0.396273	0.396273	0.318777	0.333366	0.410833	0.410833	0.333366	1	28.4336	1	28.4336	0.002574	0.003787992	0.74	8.00E-04	-0.043	0.007	PEL	Model_Misspecified	0.01	0	0.02	NA	NA	NA	ND	ND	21
	AR0152	AR0152.1	AR0152_1_01	Tooth	30	Barrancas B6	Globe, Copenaghen; CAGT	double	full	3	3	Male	Male	8.905672	0.1052	108.867902	0.123561	0.133931	0.133931	0.123561	0.130066	0.139963	0.139963	0.130066	0.999336	10.1204	0.999336	10.1204	-0.001299	0	0.44	9.00E-04	-0.075	0.01	PEL	Model_Misspecified	0.01	0	0.02	NA	NA	NA	ND	ND	8
LowCov	AR0155	AR0155.1	AR0155.1	Petrous	16	Barrancas B6	Institute of Genomics, Tartu	double	none	10	10	Male	Male	0.300436	0.0882	46.92883405	0.0011024	0.00110851	0.00110851	0.0011024	0.00135751	0.00136098	0.00136098	0.00135751	0.122397	0.129217	0.122397	0.129217	NA	NA	0	1.00E-06	NA	NA	NA	NA	NA	NA	NA	NA	NA	NA	NA	NA	NA
	AR0161	AR0161.1	AR0161.1.02	Tooth	BR3	Barrio Ramos	Globe, Copenaghen; Institute of Genomics, Tartu	double	full	2	3	Female	Female	5.452194	0	97.67002356	0.136678	0.149141	0.3646988	0.290737	0.144911	0.157251	0.3872728	0.309746	1	25.567	1	63.437	NA	NA	0.41	5.00E-04	-0.056	0.009	PEL	Model_Misspecified	0.01	0	0.02	NA	NA	NA	ND	ND	19
	AR0161	AR0161.1	AR0161_1_2_l16	Tooth	BR3	Barrio Ramos	Globe, Copenaghen; CAGT	double	full	2	2	Female	Female	5.443218	22.9245	96.13362825	0.0786328	0.0827448	0.3646988	0.290737	0.0845661	0.0885638	0.3872728	0.309746	0.999215	14.7207	1	63.437	NA	NA	0.53	5.00E-04	-0.065	0.011	PEL	Model_Misspecified	0.01	0	0.02	NA	NA	NA	ND	ND	11
	AR0161	AR0161.1	AR0161_1_2_l40	Tooth	BR3	Barrio Ramos	Globe, Copenaghen; CAGT	double	full	2	2	Female	Female	5.084865	19.4876	97.65818733	0.122993	0.132813	0.3646988	0.290737	0.131606	0.141458	0.3872728	0.309746	1	23.1493	1	63.437	NA	NA	0.41	5.00E-04	-0.056	0.008	PEL	Model_Misspecified	0.01	0	0.02	NA	NA	NA	ND	ND	18
	AR0162	AR0162.1	AR0162_1.i705.i501	Petrous	5	Barrio Ramos	Institute of Genomics, Tartu	double	half	3	3	Female	Female	30.035928	2.903	50.7365031	0.585626	0.965005	0.965005	0.585626	0.69104	1.19883	1.19883	0.69104	1	115.274	1	115.274	NA	NA	0.39	6.00E-04	-0.042	0.005	PEL	Model_Misspecified	0.01	0	0.02	0.01	0	0.02	ND	ND	97
	AR0180	AR0180.1	AR0180_1_3_l18	Tooth	239	Tumulo II	Globe, Copenaghen; CAGT	double	full	2	2	Female	Female	1.859217	7.9923	80.69118931	0.0427029	0.0441587	0.0987422	0.0924967	0.0445718	0.0457424	0.103127	0.0973815	0.934396	3.13501	0.990585	7.31076	NA	NA	0.35	7.00E-04	-0.1	0	PEL	None	0.01	0	0.03	NA	NA	NA	ND	ND	3
	AR0180	AR0180.1	AR0180_1_3_l43	Tooth	239	Tumulo II	Globe, Copenaghen; CAGT	double	full	2	2	Female	Female	2.272897	6.5656	76.43040277	0.0525141	0.0545835	0.0987422	0.0924967	0.0555796	0.0573846	0.103127	0.0973815	0.963848	4.17575	0.990585	7.31076	NA	NA	0.48	5.00E-04	-0.062	0.015	PEL	Model_Misspecified	0.01	0	0.03	NA	NA	NA	ND	ND	4
LowCov	AR0182	AR0182.1	AR0182_1_02	Tooth	242	Tumulo II	Globe, Copenaghen; CAGT	double	full	6	6	Unassigned	Unassigned	0.131259	2.9339	95.09393822	0.000592942	0.00059533	0.00059533	0.000592942	0.000638775	0.000638775	0.000638775	0.000638775	0.441789	0.594967	0.441789	0.594967	NA	NA	0	1.00E-04	NA	NA	NA	NA	0.99	0.98	0.99	NA	NA	NA	ND	ND	2
LowCov - Cont_SchmuA	AR0183	AR0183.1	AR0183_1_02	Tooth	243	Tumulo II	Globe, Copenaghen; CAGT	double	full	10	10	NotTested	NotTested	0.011584	0.8323	55.56165268	2.97E-05	2.97E-05	2.97e-05	2.97E-05	2.69E-05	2.69E-05	2.69e-05	2.69E-05	0.000784598	0.000784598	0.000784598	0.000784598	NA	NA	NA	NA	NA	NA	NA	NA	0.67	0.38	0.96	NA	NA	NA	NA	NA	NA
LowCov	AR0185	AR0185.1	AR0185.1.0201	Tooth	810a	Potrero Las Colonias	Globe, Copenhagen	single	half	6	7	Male	Male	0.198486	0.0583	61.43222419	0.000867081	0.000870222	0.00354994	0.00352337	0.00100379	0.00100553	0.003801367	0.00379007	0.92836	2.74012	0.994447	8.299598	NA	NA	0.28	8.00E-04	NA	NA	NA	NA	0.01	0.01	0.02	0.01	0.01	0.02	ND	ND	2
LowCov	AR0185	AR0185.1	AR0185_1_03	Tooth	810a	Potrero Las Colonias	Globe, Copenaghen; CAGT	double	full	6	6	Male	Male	0.166906	3.0173	88.20132809	0.00254594	0.00256292	0.00354994	0.00352337	0.00266721	0.00266982	0.003801367	0.00379007	0.965719	4.63148	0.994447	8.299598	NA	NA	0.61	6.00E-04	NA	NA	NA	NA	0.01	0	0.02	NA	NA	NA	ND	ND	4
LowCov	AR0185	AR0185.1	AR0185_1_06	Tooth	810a	Potrero Las Colonias	Globe, Copenaghen; CAGT	double	full	10	10	Unassigned	Male	0.029926	5.6358	75.65127981	0.000116623	0.000116798	0.00354994	0.00352337	0.000126017	0.000126017	0.003801367	0.00379007	0.60233	0.927998	0.994447	8.299598	NA	NA	0	1.00E-04	NA	NA	NA	NA	0.01	0.01	0.02	NA	NA	NA	ND	ND	2
LowCov	AR0186	AR0186.1	AR0186_1_01	Tooth	807a	Potrero Las Colonias	Globe, Copenaghen; CAGT	double	full	2	2	Female	Female	0.590753	66.8211	105.025729	0.0014004	0.00141464	0.00141464	0.0014004	0.0013801	0.00138532	0.00138532	0.0013801	0.138693	0.154928	0.138693	0.154928	NA	NA	0	1.00E-06	NA	NA	NA	NA	0.01	0.01	0.02	NA	NA	NA	NA	NA	NA
LowCov	AR0187	AR0187.1	AR0187_1_01	Tooth	308	Potrero Las Colonias	Globe, Copenaghen; CAGT	double	full	3	6	Male	Male	0.228908	38.3017	104.0253782	0.000440794	0.000444156	0.000444156	0.000440794	0.000426719	0.000428458	0.000428458	0.000426719	0.0531716	0.0550425	0.0531716	0.0550425	NA	NA	0	1.00E-06	NA	NA	NA	NA	0.01	0.01	0.02	NA	NA	NA	NA	NA	NA
LowCov	AR0191	AR0191.1	AR0191_1_03	Tooth	302	Potrero Las Colonias	Globe, Copenaghen; CAGT	double	full	10	10	NotTested	NotTested	0.036543	2.0199	79.33862791	7.54E-05	7.56E-05	7.56e-05	7.54E-05	7.73E-05	7.73E-05	7.73e-05	7.73E-05	0.744644	1.4532	0.744644	1.4532	NA	NA	0	3.00E-04	NA	NA	NA	NA	0.01	0.01	0.02	NA	NA	NA	ND	ND	2
LowCov	AR0192	AR0192.1	AR0192_1_01	Tooth	300	Potrero Las Colonias	Globe, Copenaghen; CAGT	double	full	2	1	Male	Male	0.120655	22.0623	93.45985495	0.000998407	0.00100633	0.00100633	0.000998407	0.00101509	0.00101683	0.00101683	0.00101509	0.920333	2.805	0.920333	2.805	NA	NA	0	6.00E-04	NA	NA	NA	NA	0.01	0.01	0.02	NA	NA	NA	ND	ND	3
LowCov	AR0193	AR0193.1	AR0193_1_01	Tooth	299	Potrero Las Colonias	Globe, Copenaghen; CAGT	double	full	2	2	Female	Female	0.325893	12.3386	106.9980949	0.0011627	0.00117018	0.00117018	0.0011627	0.00120107	0.00120368	0.00120368	0.00120107	0.46587	0.60402	0.46587	0.60402	NA	NA	0	1.00E-06	NA	NA	NA	NA	0.01	0.01	0.02	NA	NA	NA	NA	NA	NA
LowCov	AR0194	AR0194.1	AR0194_1_01	Tooth	298	Potrero Las Colonias	Globe, Copenaghen; CAGT	double	full	5	4	Male	Male	0.066548	16.9053	99.44016637	0.000281237	0.000282625	0.000282625	0.000281237	0.000320691	0.000320691	0.000320691	0.000320691	0.839701	1.78526	0.839701	1.78526	NA	NA	0	5.00E-04	NA	NA	NA	NA	0.01	0.01	0.02	NA	NA	NA	ND	ND	2
	AR0195	AR0195.1	AR0195.1.0101	Tooth	297	Potrero Las Colonias	Globe, Copenhagen	single	half	1	2	Female	Female	6.160106	0.1567	68.12372949	0.0204055	0.0207499	0.021136366	0.0207801	0.0230828	0.0233922	0.023771989	0.0234487	0.997827	8.66842	0.997888	9.417832	NA	NA	0.34	9.00E-04	-0.1	0	PEL	Model_Misspecified	0.01	0.01	0.02	0.01	0	0.02	ND	ND	7
	AR0195	AR0195.1	AR0195_1_05	Tooth	297	Potrero Las Colonias	Globe, Copenaghen; CAGT	double	full	7	7	Female	Female	0.120567	2.9152	67.16619718	0.00038485	0.000386466	0.021136366	0.0207801	0.000379789	0.000379789	0.023771989	0.0234487	0.501901	0.749412	0.997888	9.417832	NA	NA	0	1.00E-06	NA	NA	NA	NA	0.01	0.01	0.02	NA	NA	NA	ND	ND	2
	AR0500and513	AR0500.1	AR0500_1.i706.i501	Petrous	290 and lote Petr. Der. #1	Potrero Las Colonias	Institute of Genomics, Tartu	double	half	5	6	Female	Female	11.97966	0.4483	52.35324878	0.269986	0.322764	0.951552	0.450867	0.319432	0.386597	1.13914	0.524548	0.999638	35.2045	0.999698	88.4174	NA	NA	0.58	0.0011	-0.042	0.007	PEL	Model_Misspecified	0.01	0	0.02	0.01	0	0.02	NO	ND	23
	AR0500and513	AR0513.1	AR0513_1.i713.i501	Petrous	290 and lote Petr. Der. #1	Potrero Las Colonias	Institute of Genomics, Tartu	double	half	4	7	Female	Female	26.982068	0.1715	56.8615474	0.450867	0.628788	0.951552	0.450867	0.524548	0.752543	1.13914	0.524548	0.999698	53.2129	0.999698	88.4174	NA	NA	0.73	0.0011	-0.041	0.007	PEL	Model_Misspecified	0.01	0	0.02	0.01	0	0.02	NO	ND	37
	AR0501	AR0501.1	AR0501_1.i707.i516	Petrous	292	Potrero Las Colonias	Institute of Genomics, Tartu	double	half	5	6	Male	Male	13.9973875	0.2482	50.11552322	0.261715	0.312645	0.312645	0.261715	0.322171	0.391676	0.391676	0.322171	0.999336	44.3807	0.999336	44.3807	0.023215	0.0107146	0.62	0.001	-0.061	0.007	PEL	Model_Misspecified	0.01	0	0.02	0.01	0	0.02	ND	ND	29
LowCov	AR0502	AR0502.1	AR0502.1	Petrous	293	Potrero Las Colonias	Institute of Genomics, Tartu	double	none	10	10	Male	Male	1.060721	0.0811	51.40686112	0.00506866	0.00510716	0.00510716	0.00506866	0.0065129	0.00652855	0.00652855	0.0065129	0.619712	0.974651	0.619712	0.974651	NA	NA	0	0.0018	-0.004	0.169	PEL	Model_Misspecified	NA	NA	NA	NA	NA	NA	ND	ND	2
	AR0503	AR0503.1	AR0503.1	Petrous	809	Potrero Las Colonias	Institute of Genomics, Tartu	double	none	10	10	Female	Female	12.605404	0.2019	47.3003994	0.0538515	0.0558822	0.0558822	0.0538515	0.0686532	0.0712274	0.0712274	0.0686532	0.998974	8.88726	0.998974	8.88726	NA	NA	2.9	0.0061	-0.033	0.018	PEL	None	0.02	0.01	0.03	0.02	0.01	0.03	ND	ND	5
	AR0504	AR0504.1	AR0504.1	Petrous	387 (lote)	Potrero Las Colonias	Institute of Genomics, Tartu	double	none	10	10	Female	Female	57.2430735	1.8073	48.3446192	0.679865	1.42759	5.14606	0.921632	0.81673	1.87336	6.67104	0.992377	1	91.1098	1	209.5978	NA	NA	3.8	0.008	-0.056	0.009	PEL	None	0.02	0.01	0.03	0.02	0.01	0.03	NO	ND	60
	AR0504	AR0504.1	AR0504_1i710507	Petrous	387 (lote)	Potrero Las Colonias	Institute of Genomics, Tartu	double	none	10	10	Female	Female	58.6256575	1.9033	45.99150397	0.877462	3.71847	5.14606	0.921632	0.978503	4.79768	6.67104	0.992377	1	118.488	1	209.5978	NA	NA	4.4	0.0091	-0.057	0.008	PEL	None	0.02	0.01	0.03	0.02	0.01	0.03	NO	ND	81
Cont_Hap	AR0505	AR0505.1	AR0505.1	Petrous	471a	Potrero Las Colonias	Institute of Genomics, Tartu	double	none	10	10	Male	Male	31.4713065	1.7354	48.76113501	0.616782	1.2031	4.80123	0.925486	0.76793	1.6424	6.51096	0.9922	1	109.109	1	244.984	0.009381	0.003874952	4.4	0.01	-0.039	0.006	PEL	None	0.02	0.01	0.03	0.02	0.01	0.03	YES	0.073	77
Cont_Mix	AR0505	AR0505.1	AR0505_1i711506	Petrous	471a	Potrero Las Colonias	Institute of Genomics, Tartu	double	none	10	10	Male	Male	33.7483745	2.4508	46.16193332	0.865765	3.59813	4.80123	0.925486	0.974773	4.86856	6.51096	0.9922	1	135.875	1	244.984	0.008776	0.001809768	5.9	0.0114	-0.041	0.007	PEL	None	0.03	0.02	0.04	0.03	0.02	0.04	NO	ND	98
	AR0506	AR0506.1	AR0506_1.i708.i515	Petrous	471b	Potrero Las Colonias	Institute of Genomics, Tartu	double	half	5	6	Female	Female	28.7889805	0.2171	50.44630032	0.490351	0.726483	0.726483	0.490351	0.589983	0.914105	0.914105	0.589983	0.999457	84.6005	0.999457	84.6005	NA	NA	0.45	0.001	-0.04	0.006	PEL	Model_Misspecified	0.01	0	0.02	0.01	0	0.02	NO	ND	61
	AR0507	AR0507.1	AR0507_1.i709.i514	Petrous	471c	Potrero Las Colonias	Institute of Genomics, Tartu	double	half	4	5	Female	Female	31.581476	0.6333	53.8996403	0.427491	0.585408	0.585408	0.427491	0.504051	0.710429	0.710429	0.504051	0.999638	74.3781	0.999638	74.3781	NA	NA	0.59	0.0013	-0.048	0.007	PEL	Model_Misspecified	0.01	0	0.02	0.01	0	0.02	NO	ND	57
	AR0508	AR0508.1	AR0508_1.i710.i513	Petrous	471g	Potrero Las Colonias	Institute of Genomics, Tartu	double	half	4	6	Female	Female	13.9377225	0.1629	53.52546757	0.510327	0.766334	0.766334	0.510327	0.603368	0.94498	0.94498	0.603368	0.999517	85.3421	0.999517	85.3421	NA	NA	0.58	0.001	-0.06	0.008	PEL	Model_Misspecified	0.01	0	0.02	0.01	0	0.02	NO	ND	66
	AR0509	AR0509.1	AR0509_1.i711.i503	Petrous	471j	Potrero Las Colonias	Institute of Genomics, Tartu	double	half	4	6	Male	Male	51.558699	0.2529	54.43258655	0.724458	1.48847	1.48847	0.724458	0.832701	1.84855	1.84855	0.832701	0.999578	107.399	0.999578	107.399	0.00523	0.001600542	0.54	8.00E-04	-0.049	0.005	PEL	Model_Misspecified	0.01	0	0.02	0.01	0	0.02	NO	ND	84
	AR0510	AR0510.1	AR0510_1.i711.i512	Petrous	471k	Potrero Las Colonias	Institute of Genomics, Tartu	double	half	4	6	Male	Male	68.225698	0.3545	54.95602612	0.816715	2.09646	2.09646	0.816715	0.91493	2.58513	2.58513	0.91493	1	118.144	1	118.144	0.007618	0.001364852	0.67	8.00E-04	-0.05	0.006	PEL	Model_Misspecified	0.01	0	0.02	0.01	0	0.02	NO	ND	95
	AR0511	AR0511.1	AR0511_1.i712.i502	Petrous	471m	Potrero Las Colonias	Institute of Genomics, Tartu	double	half	5	6	Male	Male	42.714251	0.2241	55.10625485	0.562784	0.895032	0.895032	0.562784	0.662238	1.10878	1.10878	0.662238	0.999457	97.7941	0.999457	97.7941	-0.000158	0.001784271	0.49	0.001	-0.057	0.008	PEL	Model_Misspecified	0.01	0	0.02	0.01	0	0.02	NO	ND	73
Cont_Hap	AR0512	AR0512.1	AR0512_1i708511	Petrous	811a (811 on plastic bag)	Potrero Las Colonias	Institute of Genomics, Tartu	double	none	10	10	Male	Male	63.6697425	2.9658	48.39996523	0.914079	5.57731	5.57731	0.940631	0.990325	7.2844	7.2844	0.992932	1	126.139	1	126.139	0.009796	0.00144031	4.5	0.0085	-0.065	0.013	PEL	Model_Misspecified	0.02	0.01	0.03	0.02	0.01	0.03	YES	0.075	88
	AR0514	AR0514.1	AR0514_1.i713.i510	Petrous	lote Petr. Der. #2	Potrero Las Colonias	Institute of Genomics, Tartu	double	half	4	5	Male	Male	41.7662175	0.321	50.39737316	0.505094	0.753425	0.753425	0.505094	0.602152	0.933452	0.933452	0.602152	0.999336	58.9625	0.999336	58.9625	0.004319	0.002944532	0.75	0.0013	-0.043	0.005	PEL	Model_Misspecified	0.01	0	0.02	0.01	0	0.02	NO	ND	45
	AR0515	AR0515.1	AR0515_1.i714.i516	Petrous	lote Petr. Der. #3	Potrero Las Colonias	Institute of Genomics, Tartu	double	half	5	6	Female	Female	50.5235285	0.2225	50.63212739	0.80151	1.9896	1.9896	0.80151	0.898983	2.39863	2.39863	0.898983	0.999638	95.1487	0.999638	95.1487	NA	NA	0.8	9.00E-04	-0.054	0.007	PEL	Model_Misspecified	0.02	0.01	0.03	0.02	0.01	0.03	NO	ND	73
	AR0516	AR0516.1	AR0516_1.i714.i509	Petrous	lote Petr. Der. #4	Potrero Las Colonias	Institute of Genomics, Tartu	double	half	5	6	Female	Female	54.966549	1.1314	52.8992242	0.782525	1.81207	1.81207	0.782525	0.878333	2.18112	2.18112	0.878333	0.999638	87.9316	0.999638	87.9316	NA	NA	0.68	0.001	-0.056	0.005	PEL	Model_Misspecified	0.01	0	0.02	0.01	0	0.02	NO	ND	64
	AR0517	AR0517.1	AR0517_1.i715.i508	Petrous	lote Petr. Der. #5	Potrero Las Colonias	Institute of Genomics, Tartu	double	half	5	5	Male	Male	7.967374	0.1656	47.21592702	0.302747	0.37379	0.37379	0.302747	0.37288	0.469317	0.469317	0.37288	1	42.4184	1	42.4184	0.015354	0.008069866	0.66	0.001	-0.022	0.005	PEL	Model_Misspecified	0.02	0.01	0.03	0.02	0.01	0.03	ND	ND	31
	AR0518	AR0518.1	AR0518_1.i718.i512	Petrous	lote Petr. Der. #6	Potrero Las Colonias	Institute of Genomics, Tartu	double	half	5	6	Male	Male	61.21619	0.3534	53.90234105	0.840628	2.37591	2.37591	0.840628	0.935857	2.93193	2.93193	0.935857	1	117.49	1	117.49	0.007484	0.001295509	0.72	9.00E-04	-0.061	0.007	PEL	Model_Misspecified	0.03	0.02	0.04	0.03	0.02	0.04	NO	ND	92
	AR0519	AR0519.1	AR0519_1.i719.i511	Petrous	lote Petr. Der. #7	Potrero Las Colonias	Institute of Genomics, Tartu	double	half	5	5	Male	Male	60.1922485	0.2099	52.56918298	0.824749	2.23978	2.23978	0.824749	0.927062	2.79317	2.79317	0.927062	1	104.604	1	104.604	0.007322	0.001353318	0.65	8.00E-04	-0.045	0.007	PEL	Model_Misspecified	0.01	0	0.02	0.01	0	0.02	NO	ND	80
	AR0520	AR0520.1	AR0520_1.i720.i510	Petrous	lote Petr. Der. #8	Potrero Las Colonias	Institute of Genomics, Tartu	double	half	4	5	Female	Female	28.5771295	4.9025	56.46442635	0.247064	0.290231	0.290231	0.247064	0.280715	0.330686	0.330686	0.280715	0.999155	28.2989	0.999155	28.2989	NA	NA	0.74	0.0015	-0.045	0.008	PEL	Model_Misspecified	0.02	0.01	0.03	0.02	0.01	0.03	ND	ND	22
	AR0521	AR0521.1	AR0521_1.i701.i515	Petrous	lote Petr. Der. #9	Potrero Las Colonias	Institute of Genomics, Tartu	double	half	4	5	Female	Female	43.505444	0.237	51.70643127	0.606529	1.03389	1.03389	0.606529	0.712756	1.28303	1.28303	0.712756	0.999336	61.7414	0.999336	61.7414	NA	NA	0.89	0.0012	-0.049	0.005	PEL	Model_Misspecified	0.01	0	0.02	0.01	0	0.02	NO	ND	48
	AR0522	AR0522.1	AR0522_1.i702.i514	Petrous	lote Petr. Der. #10	Potrero Las Colonias	Institute of Genomics, Tartu	double	half	6	6	Male	Male	50.1152785	0.2243	49.68721184	0.571139	0.933333	0.933333	0.571139	0.686879	1.19066	1.19066	0.686879	1	73.8413	1	73.8413	0.007812	0.002778237	0.56	0.001	-0.054	0.006	PEL	Model_Misspecified	0.01	0	0.02	0.01	0	0.02	ND	ND	52
	AR0523	AR0523.1	AR0523_1.i703.i513	Petrous	lote Petr. Der. #11	Potrero Las Colonias	Institute of Genomics, Tartu	double	half	5	5	Female	Female	53.297537	0.2505	50.00667597	0.799445	1.99852	1.99852	0.799445	0.903809	2.45132	2.45132	0.903809	0.999457	95.5225	0.999457	95.5225	NA	NA	0.69	9.00E-04	-0.059	0.007	PEL	Model_Misspecified	0.01	0	0.02	0.01	0	0.02	NO	ND	72
	AR0524	AR0524.1	AR0524.1	Petrous	301	Potrero Las Colonias	Institute of Genomics, Tartu	double	none	10	10	Male	Male	4.522721	0.0969	47.44202084	0.0163549	0.0165761	0.0165761	0.0163549	0.0217792	0.0220425	0.0220425	0.0217792	0.855996	2.05456	0.855996	2.05456	0	0	1.1	0.0025	-0.1	0	PEL	Model_Misspecified	0.02	0.01	0.03	0.02	0.01	0.03	ND	ND	2
	AR0526	AR0526.1	AR0526_1.i704.i512	Petrous	471 s/Letra 1	Potrero Las Colonias	Institute of Genomics, Tartu	double	half	4	5	Male	Male	65.9443805	0.6632	51.31770324	0.722188	1.49629	1.49629	0.722188	0.839446	1.89714	1.89714	0.839446	1	121.617	1	121.617	0.005156	0.001606009	0.48	8.00E-04	-0.033	0.003	PEL	Model_Misspecified	0.02	0.01	0.03	0.02	0.01	0.03	NO	ND	96
	AR0527	AR0527.1	AR0527_1.i705.i511	Petrous	471 s/Letra 2	Potrero Las Colonias	Institute of Genomics, Tartu	double	half	5	5	Male	Male	20.3075535	0.19	51.87559345	0.547551	0.873251	0.873251	0.547551	0.665276	1.12794	1.12794	0.665276	0.999396	85.8408	0.999396	85.8408	0.003947	0.002297612	0.51	0.001	NA	NA	NA	NA	0.02	0.01	0.03	0.02	0.01	0.03	NO	ND	64
	AR0528	AR0528.1	AR0528_1.i706.i510	Petrous	471 s/Letra 3	Potrero Las Colonias	Institute of Genomics, Tartu	double	half	4	6	Female	Female	41.319993	0.2869	55.51969626	0.528287	0.811161	0.811161	0.528287	0.622359	0.997334	0.997334	0.622359	0.999517	83.2894	0.999517	83.2894	NA	NA	0.47	0.001	-0.049	0.006	PEL	Model_Misspecified	0.01	0	0.02	0.01	0	0.02	ND	ND	64
